# Supplementary material for: iRSpot-PseDNC: identify recombination spots with pseudo dinucleotide composition
Source: PubMed Central journal article supplement — Nucleic Acids Res. 2013 Jan 8;41(6):e68. doi: 10.1093/nar/gks1450 (PMC3616736; doi:10.1093/nar/gks1450), 2013-01-08
Supplement: supp_gks1450_nar-02748-met-n-2012-File002.pdf [file supp_gks1450_nar-02748-met-n-2012-File002.pdf]

**Supporting Information S1.** The benchmark dataset  $\mathcal{S}$  consists of a positive dataset  $\mathcal{S}^+$  and a negative dataset  $\mathcal{S}^-$ . The positive dataset contains 490 recombination hot spots, while the negative dataset contains 591 recombination cold spots.

(1)  $\mathcal{S}^+$ : 490 recombination hot spots

>YYDL087C 1.67 Hot

```
ATGTCAACTATGTCAACGCCTGCCGAGAACAAACGAAACTCGTTCGAACAGCTGATGGGCAG
GGACTTCAGTTTCCGCCACAACAGGTATTCGCATCAAAAAAGAGACCTCGGACTACACGATC
CCAAGATCTGCAAGTCATACCTTGTGGCGAGTGCCCTACGACCTGTTTCAGGGACCAAG
CAGAGCCTGGGAAAATGCCCGCAGATGCATCTTACCAAGCATAAAATTCAGTACGAGAGAGA
GGTCAAGCAGGGCAAACGTTTCCCGAATTCGAAAGAGAATATCTGGCCATTCTATCTCGGT
TTGTTAATGAGTGTAAATGGCCAGATATCCGTAGCACTACAAAATCTAAAACACACCGCTGAG
GAACGAATGAAGATTCAGCAGGTTACCGAAGAAGTAGATGTCTTGGACGTGCGGATAGGCCT
AATGGGACAAGAGATTGATTCTTTAATTCGTGCAGATGAAGTCAGTATGGGTATGCTACAGT
CAGTCAAATTACAAGAACTGATTAGTAAAAGGAAAGAAGTTGCAAACGTGTACGAAACATT
ACAGAAAACGTGGGCCAGAGCGCCAGCAAAAAGTTACAGGTTTGCAGGTTGTGTGGGGCATA
CCTATCGCGTTTGTAGATACAGACAGAAGGCTTGCTGACCATTCTTGGGGAAGATTTCATCTGG
GATATGTCAAGATGAGAGAGGATTATGATCGGCTAATGAAGAATAACCGGACAACCTAACGCC
AGCAAGACAGCTACTACTACCCGGAAGACGCTTTGTGTAG
```

>YBR268W 1.71 Hot

```
ATGTTGGCGCGCAGTTTGGGTTACAGGTTGATATCGACCAGTCGTATCTTATATAATAAAC
CACGGTTAAGTCAGTGGTGTCTGTCGTCTGCGGGAACATCGCTTAACTTAAACATATGGA
AGAGCGGTAAAGACGCAGTGGCACTCGAGGACAAGGAGTATCCAAATTGGTTATGGAGCGTA
TTGGATAGTGATCACGTTGTGCAACATGCGGCTGAGGACCCAGAGGGACAGGCTCTCTTAAA
GAGAAGAAAGAACATAAGGAAGGCGAACAGGCAGCGAATCAAGCAAAACAATTTCTTGAGCC
AACTTTAA
```

>YAL046C 1.56 Hot

```
ATGAAGCTCCACAGACCATGCTACGTTCTATATCTGTGAAGCATGTCCGGTGGCCAAGGAT
TCTGACGGGCTCAAAGCTTTGGTACTCAACGCAGATGGCAATGACTCCGGAGGAGAAGATGA
TCACCGATAAACTACAACAGGAACTGGAACCTGAAGTGTGTAAGTGAAGACGTTTCCGGT
GGCTGCGGATCCATGTTTGGCTATCAACATAACAAGCAAGAAGTTCAACGGACTGAGTCTCAT
CAAGCAGCACCAGCTGGTGAACAGAATTTTGGAGGACGATATTTCCAGATGGCATGGCCTAC
AATTGACCACTAAGAAGTCAACTGGGAAGGGTCCGGCATCATCATGA
```

>YLR232W 2.04 Hot

```
ATGGGGGCTAGTAGTGGAAGAATAGGTAAGTCAATGCTGACCCAAGGCACCTTTCCTCTGGC
TTCTTCAGGATGTTTGAATGCGATTCCACAGCACAATCGCTCCACGCATCTAGCTCAGCAT
TAATTGAATTCCTAGTTGACTTCGGCATCAAACCTAAAGAATTTCCGCATAAGTACGTCACA
GGCTTATCGTCCGACGATAGTCCCATGGATTTAAATGTAGGGATGTTGAATTCATCCCTCAG
AGATTCCGGATATTCTCCGTCTAATTTCAAAGCTTCTCCATAATTACCAGTTTGTTCCTTT
TTTCCACAGAATATTTAGGCTTAATATGTACGTATTGA
```

>YOR173W 2.12 Hot

```
ATGGGTTCCCAAGATTTAGCTAGTTTAAATTGGGAGGTTTAAATACGTCAGGGTGTAGATTC
GAACCTCATACAAAGGTAATCTCACTACTAGGCAGCATAGATGGGAAGGATGCCGTGTTAA
CTGCTGAAAAGACGCATTTTCATATTTGATGAAACGGTACGTAGACCCTCTCAAAGTGGCCGT
AGCACTCCGATTTTCTTTTCATCGTGAAATAGACGAGTACTCCTTTTTTAAACGGTATTACTGA
TCTGAAGGAATTAACCTTGAATGACATCTACTACTGGGGTTGTCTGTTTGAAGCAGCATA
TTTTGCATAAACCAACTGCGAAGGTTAACTTAAATTTGGCCCGCCTCGCAGTTCCACATCAAG
GGATACGACCAGCAGGATTTACATGTCTGTCAGAGAACTCCTGATATGTATAGAAACATAGT
TGTGCCCTTTATCCAAGAGATGTGTACCAGCGAAAGAATGAAATGGGTAAACAACATTTCTTT
ACGAGGGCGCCGAGGATGATAGAGTTGTTTATAAGGAATACAGTAGCAGGAATAAAGAGGAT
```

GGATTCGTCATCTTGCCCGATATGAAGTGGGACGGAATCAACATTGATTCGTTATACCTGGT  
 CGCGATCGTGTACAGGGACGACATCAAATCTTTGAGAGATTTGAACCCAAACCATAGAGATT  
 GGTAAATTAGACTCAATAAGAAGATTAAGACCATCATCCCCAGCACTATGACTATAATGTA  
 AACCCGACGAGCTAAGAGTTTTTCATTCATTATCAACCTTCATATTACCATTTTTTCATGTCCA  
 TATAGTGAATATAAGGCATCCAGGAGTAGGCGAGGAGAGAGGCTCCGGAATGACAATACTGT  
 TGGAAGATGTTATAGAAGCGTTGGGTTTTCTTAGGTCCTGAAGGTTATATGAAGAAGACGCTT  
 ACTTATGTCATTGGTGAAAATCATGATTTATGGAAAAAGGGCTTTAAGGAAGAAGTTGAAAA  
 GCAACTGAAGCATGATGGTATCGCAACCAGTCCTGAAAAAGGCTCTGGGTTCAATACCAATT  
 TGGGTTGA

>YKL087C 1.72 Hot

ATGATGTCTTCAGACCAACAGGGGAAATGCCCGTAGATGAGGAAACCAAAAAGTTATGGCT  
 ACGAGAACATGGCAACGAAGCGCATCCTGGTGCTACTGCCCCAGGCAATCAACTAGAGTGCT  
 CTGCAAACCCACAAGATAACGATAAAAACGCCTGAATATCACACCACGGTGGATCTCTCTCAG  
 TCCAGAGAGGTTTCCACCATACCAAGGACGAATTCTGACAGAACTGGATATACCCGTCGGA  
 GAAACAATTTTACGAGGCAATGATGAAAAAAAATTGGGATCCGAACTCAGATGACATGAAGG  
 TGGTTGTGCCTTTACATAACTCCATCAATGAGCGGGTTTTGGAACACATTAAGCTGGGAA  
 GACAAGCAGGGTGGTGAAGCGTGTGGCGGTATCAAATTAACAAATTTTAAAGGTGATTCCAA  
 AAAACTGACACCAAGGGCCTGGTTCAGGTCCCCTATCTTGCACCTGGCCAAACCTTTTGATA  
 GACATGATTGGCAGATAGATAGATGCGGTAAAACCGTCGACTACGTAATCGATTTCTATTCC  
 ACCGATCTGAACGATGCAAACCTCGCAGCAACAACCACTTATTTATCTCGATGTTAGACCAA  
 ATTAACAGTTTTTGGGGCTTTAGATTACGGTTCCTGGAAATCTTTAGGCTTTTTGA

>YGR086C 1.5 Hot

ATGCACAGAACTTACTCTTTAAGAAATTCAGGGCACCTACCGCCTCTCAATTACAGAACCC  
 ACCGCCACCACCATCTACAACCAAAGGTAGATTCTTTGGGAAGGGTGGTCTAGCTTACAGCT  
 TTAGGAGAAGTGCTGCTGGAGCTTTTTGGCCAGAATTATCCAGAAAGTTGTCTCAATTGGTT  
 AAGATTGAAAAGAATGTTTTGAGGTCCATGGAATTGACAGCCAACGAAAGACGTGACGCTGC  
 TAAGCAATTGTCTATTTGGGGTTGGAAAACGATGACGATGTTTCCGACATCACTGATAAAT  
 TAGGTGTCTTGATCTATGAAGTTAGTGAATTAGACGACCAATTTATCGATCGTTATGACCAA  
 TACAGATTGACTCTAAAGTCCATCAGAGATATCGAAGGTTCTGTTCAACCATCTAGAGACCG  
 TAAGGACAAGATCACCGACAAAATCGCCTACTTGAATAACAAAGATCCTCAATCACCTAAGA  
 TTGAGGTCTTGGAAACAAGAATTGGTGCCTGCTGAGGCTGAATCTTTGGTCGCTGAAGCTCAA  
 TTATCTAATATCACAAGGTCAAAGTTGAGAGCTGCTTTCAACTACCAATTTGACTCCATCAT  
 CGAACATTCAGAGAAAATTGCTTTAATCGCTGGTTACGGTAAGGCTCTCTTGGAACTATTGG  
 ACGACTCTCCTGTCACTCCAGGTGAAACCAGGCCTGCTTACGATGGGTATGAAGCCTCTAAA  
 CAAATCATTATTGATGCTGAAAGCGCACTGAATGAATGGACACTAGACTCTGCCCAAGTCAA  
 GCCTACTTTAAGTTTCAAGCAGGATTACGAAGACTTCGAACCTGAAGAAGGCGAAGAAGAGG  
 AAGAGGAAGACGGTCAAGGCAGGTGGTCCGAAGACGAACAAGAAGATGGACAAATTGAAGAA  
 CCTGAACAAGAAGAAGGTGCTGTTGAAGAACATGAACAAGTCGGACACCAGCAAAGTGA  
 GTCTCTTCCCAACAAACAACAGCTTAA

>YIL155C 2.16 Hot

ATGTTTTTCGGTAACGAGAAGAAGAGCTGCCGGTGCAGCTGCTGCCATGGCCACAGCCACGGG  
 GACGCTGTACTGGATGACTAGCCAAGGTGATAGGCCGTTAGTGCACAATGACCCGAGCTACA  
 TGGTGCAATTTCCCACCGCCGCTCCACCGCAGGTCTCTAGACGAGACCTGCTGGACCGTCTG  
 GCCAAGACGCATCAATTCGACGTGTTGATCATCGGTGGCGGGGCCACGGGGACAGGATGTGC  
 CCTAGATGCTGCGACCAGGGGACTCAATGTGGCCCTTGTGAAAAGGGGGATTTTGCCTCGG  
 GAACGTCGTCCAAATCTACCAAGATGATTCACGGTGGGGTGCAGTACTTAGAGAAGGCCCTTC  
 TGGGAGTTCTCCAAGGCACAACCTGGATCTGGTCATCGAGGCACTCAACGAGCGTAAACATCT  
 TATCAACACTGCCCCTCACCTGTGCACGGTGTACCAATTCGATCCCCATCTACAGCACCT  
 GGCAGGTCCCCTACATCTATATGGGCTGTAAATTTCTACGATTTCTTTGCCGGTTCCCAAAAC  
 TTGAAAAAATCATACCTACTGTCCAAATCCGCCACCGTGGAGAAGGCTCCCATGCTTACCAC  
 AGACAATTTAAAGGCCTCGCTTGTGTACCATGATGGGTCTTTAACGACTCGCGTTTTGAACG  
 CCATTTTAGCCATCACGGCTGTGGAGAACGGCGCTACCGTCTTGAACATATGTCGAGGTACAA  
 AAATGATCAAAGACCCAACCTCTGGTAAGGTTATCGGTGCCGAGGCCCGGGACGTTGAGAC  
 TAATGAGCTTGTGAGAATCAACGCTAAATGTGTGGTCAATGCCACGGGCCATACAGTGACG

CCATTTTGCAAATGGACCGCAACCCATCCGGTCTGCCGGACTCCCCGCTAAACGACAACCTCC  
 AAGATCAAGTCGACTTTCAATCAAATCGCCGTCATGGACCCGAAAATGGTCATCCCATCTAT  
 TGGCGTTCACATCGTATTGCCCTCTTTTTACTGCCCGAAGGATATGGGTTTGGTGGACGTCA  
 GAACCTCTGATGGCAGAGTGATGTTCTTTTTACCTTGGCAGGGCAAAGTCCTTGCCGGCACC  
 ACAGACATCCCATAAAGCAAAGTCCCAGAAAACCTATGCCACAGAGGCTGATATTCAAGA  
 TATCTTGAAAGAACTACAGCACTATATCGAATTCGCCGTGAAAAGAGAAGACGTGCTAAGTG  
 CATGGGCTGGTGTGACACCTTTGGTCAGAGATCCACGTACAATCCCCGCAGACGGGAAGAAG  
 GGCTCTGCCACTCAGGGCGTGGTAAGATCCCACCTTCTTGTTCACCTTCGGATAATGGCCTAAT  
 TACTATTGCAGGTGGTAAATGGACTACTTACAGACAAATGGCTGAGGAAAACAGTCGACAAAG  
 TTGTGCAAGTTGGCGGATTCCACAACCTGAAACCTTGTACACAAGAGATATTAAGCTTGCT  
 GGTGCAGAAGAATGGACGCAAACTATGTGGCTTTATTGGCTCAAACTACCATTTATCATC  
 AAAAATGTCCAACCTACTTGGTTCAAACTACGGAACCCGTTCTCTATCATTTGCGAATTTT  
 TCAAAGAATCCATGGAAAATAAACTGCCTTTGTCTTAGCCGACAAGGAAAATAACGTAATC  
 TACTCTAGCGAGGAGAACAACCTGGTCAATTTTGATACTTTCAGATATCCATTCACAATCGG  
 TGAGTTAAAGTATTCATGCAGTACGAATATTGTAGAACTCCCTTGGACTTCCTTTTAAGAA  
 GAACAAGATTGCGCTTCTTGGACGCCAAGGAAGCTTTGAATGCCGTGCATGCCACCGTCAA  
 GTTATGGGTGATGAGTTCAATTGGTCGGAGAAAAGAGGCAGTGGGAACCTTGAAAAAAGTGT  
 GAACTTCATCAAGACGTTTGGTGTCTAA

>YDR230W 1.92 Hot

ATGTTGCATATATACATAGGAAAACGGTTAAAAGGCCCTGCTTCTACCTTCTGTTTCCCCCT  
 CGTTCTTTTACCAGAACTTGTACCATTTCTTCTCAGAGGAGGCCTGAGATAAATTCTGGTT  
 ACTTTGTTCAAACCTGACTCTGCTTTTTCATTTTTGGCGGCCTCCCATTGCCCGGCAGAGATG  
 GGTTCATGAGGGACATTATGGAGCATTGGTTTTTCTTTTTCGCCACGGTTTCTTTGCCAAT  
 TGTGCGATCTGGAACTTTTTTGTCTCTTTAGCCTACATTGCTCCCATCCGACAATCGAGCC  
 CAGTATCAGAGAGCTCATCGCCCAATTCGTGGCCTTAG

>YJR071W 1.54 Hot

ATGTATTGCATGGCCTTTTTGGCTTCTCTGGCTTAGTGGCAAATTCCTCAGCAACAGTCTT  
 TAAGTTGAACAGAGCTCTAAATCTGTTGGCCAAAACCTGTTTTGCCGGACTTGTGACTAAGA  
 TGTCCCTTAGTTGCTCTAGAGTGCATTTCATCGACGTTTTCTTGGAAATGTTTTTCAAAGTTA  
 GTAGACATGTTTTTTTTTTTTCTTCTTTCGCTGGTATGTTAGAAGGACTACAGTTTTATCCTAA  
 CCTAAACCTAGAGCTACCGTCAAATATACACGTGTATTCACTGGATTTGCCCTTATGTAATTT  
 ATATGATAAAAACTTTTTCAGCTCATCGAGAAAATTTTTCTTCTCCTCCCACGCAGGATAG

>YMR244W 1.56 Hot

ATGGTACTTTGCAAATTACTGACACCATATTTCTTACTGTCAATTTTGAGTGTGCGCGTGT  
 CACGGCGACCGCCGCGCCATCGCCAGTATTCAAATGACGGAATAACAAATCAAGATCATC  
 ATGAGCATGCCAAGCGTGGAGGAACGTGTGCGTTCCCTAACCTACGATGGGATGGTTCGCAGTA  
 CAAAAAGGTGGATCTAATGGAGGATGGGCTATGAGCCCTGACCAAGAATGTTTCTACGGTTC  
 ATGGTGCCCTTACGCTTGCAAACCAGGTCAACTAATGGGGCAATGGGACCCTTCGGCTACCA  
 CATACTCTTATCCTAAATGTCAAATGGAGGTTTGTACTGTGATTCTAACGGTAACTTGCAA  
 AAGCCAAACAGTGATAAAGACTATTGTTATGATGGGAAGGGAACCGTAATAGCGAAAAACAA  
 CGCTAACAGCGGTGACGTTGCATTTTGCAGACCGTGTCTCCGGGCAACGAAGCTATGCTGA  
 TCCCAACCTTAGTCGGCTCTGGGTCAAAGCAAACGCTGGCTGTGCCTGGTACAGACTACTGG  
 GCCTCCAGCGCGTCGCATTACTACGTAATGCTCCCAGGTGTAAGCGTAGAGGATGCATGCCA  
 GTGGGGTAGTAGTGCAAATCCACAGGGGAACCTGGGCCCATTTGTAGCTGGTTCCAACATGG  
 ACGACAACCAGAACACTTTTTGTAAAGATTGGATGGAACCCCGTCTACCTGGAATCGTCATGT  
 CCGTTCAAGAACGTTAAGCCTTCATTCGGTATTAGAATTACTTGTGATGACGAATCACAATG  
 TGAAGGCCTACCATGCTCCATTGACCCAAGTTCTAATGGAGTCAACGAAGTGACAAGTCTG  
 GCGGTGTTTCTTCCGGGGCTGGTGGTGGAACTTTTGTGTTGTCACCGCCAGAAACGGCGCC  
 AAGGCCAACATCGAAGTTTTTGTGATTTGGTAGCGGCTCATCTTCTAAAGGCAAGAGAGAACT  
 GAATCCGCTAGACGTTATTACCACAACGGTCACCGAGACCAAGTACAAGACAGTCACCGTCA  
 CTGCCAAAACCTTAG

>YDR517W 1.64 Hot

ATGTTTAGAATAGCTAAAAACCTCGTACGGACTTTTGGAGCAGAGCGTGCAAGATACCCTGGC  
 ACTCTCGCAGGACTCGAGCAATCTGGACGCTTTCTTTTTCAGTCTATAACCACCAATTTGTTGT  
 CTGCTCAGTTGGAATCACCCGTAGATGCGGTTTCTGAAGGTGTTAAGCACACCAACGTC AAT  
 GAAACGCTTTCCGGTCTCCGCATTTGTTTGGGTGGACGAGATGCAGTTCCAAGTGCAGTCCTT  
 TTTGACTATATAGTAGTTTCAATGATGATCCGGTGCCGGTGGTCAGTAATCAACACGGAT  
 TTTGCTACCCAGATTACCGTCGTATCACATCCATCTTCAATGAACACTGTGGCCGAACCTTG  
 AAGGTCAACATATGGTCAGCTAAAGGAGGCACGTTTCAGAGACGAGTATATCAGCATTATATC  
 GAAGGAGAGCGACGATTTGGACGATGTTTCTCTAAACCATGACGAGAGGAGGCCATCTAGTG  
 GGAAGCGCACCAAGTCCAAGCACTCGGGTTCAAAGTCCAATGGACGCCCTTTGATAGCTTCC  
 ACTTTCACATACCATATCCTGAACGTGAACATCCCAGATGGACCCGCCAATCGGCAGGGCT  
 CATCCCAGATGAAGACTACATTATCGGCTGCCAAGATGGCCTGTTGGCCACGGGAGGGGAGA  
 CGCTTTTACAAGATATTGTTAGATCAAGAGCAAACACTACGATCTGGTCTTTATGTCTACAAC  
 AAAGTTTCTGACTGTGTGAGACCAATCACAGTTCATATAGGTCCCGACGGCAGGTTGGGTTG  
 CAACGTTGGATACGGGTTTCTTTCACAGGATTTCAAACAGTAAAGCACTGTCCACAACAAGCAC  
 AGCAGCAGGGCAAGATGACAACCCTGTTCTGTTCTGTTCCAGTAGAATCTGAGACGGCT  
 TTTGTGCCATCAGCATTACAGCACCACCGGTGCCAACAAGAAGAAATCAAAAAATAAAAA  
 GGGTACCCAGCCATTGGCAATGGATGACTATTTTAATGAAGGCAGAGATAAGTCATCTACCG  
 CTGCGAAGTCAGCAGAATCTGACATCCTCGCCCCACCACCACAAAAACAGTCATCCTCTGAT  
 TAA

>YLR379W 2.22 Hot

ATGATGGGCGAAACACCCAATTCAGTAAAAGTACCACGGTTGGAGGCCAGCATGGCACGTAG  
 CCAGTACAGAGGGTTCGGAAGTCTCACTGGACACGATCCCGTACAGCGGAATCTGGCCAGAA  
 TCAAAAAGATCAGTAGAGAAAACGCCTGTCCAGATAAGTTTCTGGTTGTATGGAACCTTCCTT  
 TCTGGAGCAATCACTTCCGGCAGGAAAGATTCAAATGGCTTAAACAAGTCTAGAACACGGTT  
 GGAGGACATTTTCAAAGTAAAGCGTGAACCAGTGTGAGTTTTTCTACTTGCTACTATATTTA  
 ACTATGTTTTTTTTCTTTTGCTTTCACCAACTGAACCTTGTAGTAAATGGAGTGAGGTTGAAT  
 TGA

>YOL085C 1.75 Hot

ATGAAGGCAAAAGACAAATATAAGGGTTCGAACGAAAAATAAAGTGAAAAGTGTTGATATGAT  
 GTATTTGGCTTTGCGGCGCCGAAAAACGAGTTTACGCAATTGCACAATCATGCTGACTCTG  
 TGGCGGACCCGCGCTCTTGCCGCCCCGGCGATAACGCTGGGCGTGAGGCTGTGCCCGGCGGA  
 GTTTTTTGCGCCTGCATTTTCCAAGGTTTACCCTGCGCTAAGGGGCGAGATTGGAGAAGCAA  
 TAAGAATGCCGGTTGGGGTTGCGATGATGACGACCACGACAACCTGGTGTCATTATTTAAGTT  
 GCCGAAAGAACCTGAGTGCATTTGCAACATGA

>YDR491C 1.59 Hot

ATGGAGGCTCTCGTTGCCTTGCAGCAGACACTATCTTGGTTTCTTCTTCTAGTAGTGGTGAT  
 ACTCATTTTTTTTTCTTCTTTTATCTTGTGCTGACTCAATTAAGGCGACTAATAACAAAACGAA  
 TGACGAAAATGGAAAACAATAGAAAAGTTAGGAACCAGAATCACTTTTGTAAAGTTAATATT  
 GCGCTTGGCGGAGCTCCTTACTGTTTCAACTGATGATACTGATATGCCTTTAGAAAAGAAATC  
 AAATTCATTAACAGAAGGGTGCCAACATGTACGTATATATATATGTGTGCGTGTGTATATA  
 TGTCTGACATATACATGAGTAACCGGCTAAGTAAGGTTTTTACGTTGATTGCTGCATCCATC  
 GGTCTGAGTATTGTCAAATTGCCGATGCCCTGCAGGCAAAAAACCGTTGAAAAATCGTTG  
 GAAAAATGGGCTTGCCCGACTGTCCGATTTAAGGGCTTGGACCCTAAAGGTTGCATGA

>YGR209C 1.85 Hot

ATGGTCACTCAATTAATAATCCGCTTCTGAATACGACAGTGCTTTAGCATCTGGCGACAAGTT  
 AGTCGTTGTTGACTTTTTTGGCACATGGTGTGGGCCATGTAAAATGATTGCACCAATGATTG  
 AAAAGTTTGCAGAACAAATATTCTGACGCTGCTTTTTACAAGTTGGATGTTGATGAAGTCTCA  
 GATGTTGCTCAAAAAGCTGAAGTTTCTTCCATGCCTACCCTAATCTTCTACAAGGGCGGTAA  
 GGAGGTTACCAGAGTCGTCCGTGCCAACCAGCTGCTATCAAGCAAGCTATTGCTTCCAACG  
 TATAG

>YJR017C 1.61 Hot

ATGCCATCTGACGTAGCATCGAGGACCGGGCTGCCAACCCCGTGGACCGTCAGGTATAGTAA  
 GTCCAAGAAAAGAGAGTATTTTTTCAATCCAGAGACGAAGCACTCGCAATGGGAGGAGCCTG  
 AGGGCACCAACAAGGACCAGCTACACAAGCACTTAAGAGACCATCCAGTGCCTGTAAGATGC  
 CTGCACATTCTCATCAAGCACAAGGATTCAAGAAGACCCGCATCGCATAGATCCGAGAACAT  
 TACGATATCCAAGCAAGACGCTACGGACGAACGAAAACCTTAATCACGAGGTTGGATGACG  
 ACTCTAAGACGAACCTCTTCGAGGCCCTGGCTAAAGAGAGATCAGATTGCTCTTCATACAAG  
 CGAGGCGGCGACCTCGGCTGGTTCGGGAGAGGCGAGATGCAGCCTAGCTTTGAAGACGCTGC  
 CTTCCAGCTCAAGTTCGGCGAGGTAAGCGATATCGTTGAATCAGGAAGCGGTGTTTCATGTGA  
 TCAAGCGGGTAGGTTAG

>YJL077C 1.82 Hot

ATGCACATATCGCTCCCTACGAGAAACAAATCCTATTTTTCGAATACGTACACGTACATATCA  
 AATAGGCTTATATCATTCTGACTCTTACCAATCAGGGACATATCAGTACTACATCTGTAA  
 TAGCAACGTTATGCACTATTTTTTTTTTCCAATTTTTTTTTTCGTTGAGTAAAGTTCAGGTCGTA  
 CAGTGGCAAGGAACGACTATTTCTAAAACTGTATTGCCTTAACCATGCTTTCCCTTGAA  
 CGCTATCCCTGGCATGTATCTGATAATTGCTTTCCCTCGTCTACAAACAGTAATTTCCCTGC  
 AGCGAAATACTCCTGTTTGAATACGAAATCGGTGATAGTAAAGGCGCAGTGAGCGTGCCA  
 CGGATCTCCTCTCCGATGCACTAG

>YGR239C 1.52 Hot

ATGCCCAGTGTCTGCCATACAAGCCCGATAGAAAAGATTATCCAACAAGGGCATCGCATACA  
 GAATGATTCCCTTAATACCGTCAAAACGCACCAAGCTGGCCCATACGGAATTAACAGCACACT  
 ATGCCACTGAAGACTCGCATGTGGAAAAACACTTTTTTGCATAATGGTAGTAATTTTGACGGC  
 ATTGACAATGTAAGGTATCAAAATCAACCTCTCCATTAACCTTCATTACTCCAAACAACAC  
 TGTAGATTCCAGTGATTGGGTTCCGCAGTCTCGTCTATGAAGATTGACGATTCACTAGAGT  
 TTAGCTCAGAATATAAAAAGGTTGTATTCCAATTACGAGTCACAGCAGCGCCTGAATTCGAAGC  
 AGACAACACTTACCTTTAAGAATTGTATGATAAGGAAGACAAGTTGCACTTACCCACCTCA  
 AAAGACGCTTCGACAGCAACGCCAAGGAAACCGGACAACCCAACGGATGCGTTTTCAATTCG  
 ACGCGGAGTTCCAAGTTTTGGAGAGAGAAATCAAAAAGAGCGGTACGAGCCATAACACGT  
 CGGGACGAGAAATGGTTCGACCAAGATCAGTCGGAACGCAAAGGATTGCCACAGATATAGT  
 AAAATGCTGTACTCCACCGCCTTCGTCTGCATCCTCCTCTTCTACTCTTTCCCTCCTGTGCG  
 AATCAAAACTATCTGAGTCGAAGTTTTATTAGTTAATGAGAAACATTAGTAGCGGTGACGTG  
 ACTTTAAAGAAAAATGCAGATGGAATTCGCAAGCGAGTTATTCTCATCCAACAACGGGGA  
 ACTGGTCGGAACAGGCACATTTTCGTCAAGGACGAAATTCACAAAGACATACTTGATTGA

>YAL054C 1.53 Hot

ATGTCGCCCTCTGCCGTACAATCATCAAACTAGAAGAACAGTCAAGTGAATTTGACAAGTT  
 GAAAGCAAAAATGTCCCAGTCTGCCGCCACTGCGCAGCAGAAGAAGGAACATGAGTATGAAC  
 ATTTGACTTCGGTCAAGATCGTGCCACAACGGCCCATCTCAGATAGACTGCAGCCCGCAATT  
 GCTACCCACTATTCTCCACACTTGGACGGGTTGCAGGACTATCAGCGCTTGACAAGGAGTC  
 TATTGAAGACCCTGCTAAGTCTTCGGTTCTAAAGCTACCCAATTTTTAAACTGGTCTAAGC  
 CATTCGATAAAGGTGTTTCATCCAGACCCTAAAACGGGCAGGCCCTCCTTCCAGAACAATGCA  
 TGGTTCCTCAACGGCCAATTAACGCCCTGTTACAACGTGTTGACAGACATGCCTTGAAGAC  
 TCCTAACAAGAAAGCCATTATTTTCGAAGGTGACGAGCCTGGCCAAGGCTATTCATTACCT  
 ACAAGGAACTACTTGAAGAAGTTTGTCAAGTGGCACAAGTGCTGACTTACTCTATGGGCGTT  
 CGCAAGGGCGATACTGTTGCCGTGTACATGCCATGGTCCCAGAAGCAATCATAACCTTGT  
 GGCCATTTCCCGTATCGGTGCCATTCCTCCGTAGTCTTTGCCGGGTTTCTTCCAACCTCCT  
 TGAGAGATCGTATCAACGATGGGGACTCTAAAGTTGTCTACTACAGATGAATCCAACAGA  
 GGTGGTAAAGTCATTGAGACTAAAAGAATTGTTGATGACGCGCTAAGAGAGACCCAGGCGT  
 GAGACACGTCTTGGTTTATAGAAAGACCAACAATCCATCTGTTGCTTTCCATGCCCCAGAG  
 ATTTGGATTGGGCAACAGAAAAGAAGAAATACAAGACCTACTATCCATGCACACCCGTTGAT  
 TCTGAGGATCCATTATTCTTGTGTATACGTCTGGTCTACTGGTGCCCCAAGGGTGTTC  
 ACATTCTACCGCAGGTTACTTGTGGGAGCTTTGTTGACCATGCGCTACACTTTTGACACTC  
 ACCAAGAAGACGTTTTCTTACAGCTGGAGACATTGGCTGGATTACAGGCCACACTTATGTG  
 GTTTATGGTCCCTTACTATATGGTTGTGCCACTTTGGTCTTTGAAGGGACTCCTGCGTACC  
 AAATTACTCCCGTTATTGGGATATTATTGATGAACACAAAGTCACCCAATTTTATGTTGCGC  
 CAACTGCTTTGCGTTTGTGAAAAGAGCTGGTGATTCTTACATCGAAAATCATTCTTAAAA

TCTTTGCGTTGCTTGGGTTCCGGTCGGTGAGCCAATTGCTGCTGAAGTTTGGGAGTGGTACTC  
 TGAAAAAATAGGTA AAAATGAAATCCCCATTGTAGACACCTACTGGCAAACAGAATCTGGTT  
 CGCATCTGGTCACCCCGCTGGCTGGTGGTGTACACCAATGAAACCGGGTCTGCCTCATT  
 CCCTTCTTCGGTATTGATGCAGTTGTTCTTGACCCTAACACTGGTGAAGA ACTTAACACCAG  
 CCACGCAGAGGGTGTCTTGGCGTCAAAGCTGCATGGCCATCATTGCAAGA ACTATTTGGA  
 AAAATCATGATAGGTATCTAGACACTTATTTGAACCCTTACCCTGGCTACTATTTCACTGGT  
 GATGGTGTGCAAAGGATAAGGATGGTTATATCTGGATTTTGGGTCGTGTAGACGATGTGGT  
 GAACGTCTCTGGTCACCGTCTGTCTACCGCTGAAATTGAGGCTGCTATATCGAAGATCCAA  
 TTGTGGCCGAGTGTGCTGTTGTCGGATTCAACGATGACTTGACTGGTCAAGCAGTTGCTGCA  
 TTTGTGGTGTGAAAAACAAATCTAGTTGGTCCACCGCAACAGATGATGAATTACAAGATAT  
 CAAGAAGCATTGTTGCTTTACTGTTAGAAAAGACATCGGGCCATTTGCCGCACCAAAATGGA  
 TCATTTTAGTGGATGACTTGCCCAAGACAAGATCCGGCAAAATATGAGACGTATTTTAAGA  
 AAAATCCTAGCAGGAGAAAGTGACCAACTAGGCGACGTTTCTACATTGTCAAACCCTGGCAT  
 TGTAGACATCTAATTGATTCCGGTCAAGTTGTAA

>YJR078W 1.52 Hot

ATGAACAACACTTCCATAAACC GGACCACAAGTACTACATAGAACAAAAATGAGACC ACTACC  
 AGTGTAGAAAAATACTGTATCTCGCCACATCATGGGTTTTTGGACGACCGGTTACCC TTGA  
 CCAGACTGAGCAGCAAGAAATATGAAATGGGAAGAAAATCGTTGCTGACCTGCCCTCTCTT  
 TTGCAAGAGGATAACAAGGTGCGGAGCGTCATCGATGGGCTGGATGTCTTGACTTGATGA  
 GACGATCTTGGGCGACGTCAGGGAGCTCAGAAGAGCATATTCATTTTGGGGTTTATGGCGC  
 ACGCTTATATTTGGGCCAGCGGA ACTCCCCGGGATGTATTACCGGAGTGTATTGCAAGGCCA  
 CTGTTGGAGACAGCACATATTTTGGGTGTGCCACCGTTAGCTACGTACTCCTCGTTGGTGT  
 ATGGA ACTTCAAAGTGACCGACGAGTGCAAGAAAACGGAAACCGGGTGT TGGACTTGAAAA  
 ATATTACAACGATAAACACATTTACGGGAACCGTTGACGAAAGTTGGTTTTATCTGGTCAGC  
 GTGCGGTTTTGAAAAAATCGGCAGCGCTTGT TTAACCATGGGTTGCAGATATTGAGAGCCAT  
 TAGAAGCGGTGATAAAGGAGACGCTAACGTGATAGACGGGTTGGAGGGCTTGGCTGCAACGA  
 TCGAAAGGTTATCGAAAGCCTTGATGGAATGGAGCTTAAGTGTGAACCCAATGTATTTTAT  
 TTCAAAGATAAGACCATTTTTTGGCCGGGTGGACGAATATGTCGCATATGGGGTTACCACAGGG  
 TGTTAGGTATGGAGCGGAAGGACAGTATCGGATCTTTTCTGGCGGGTCCAATGCGCAAAGCT  
 CGTTGATACAGACACTGGACATCCTTTTGGGTGTGAAACACACTGCGAATGCTGCGCATTTCT  
 TCCCAAGGAGACAGCAAGATCAATTATCTGGACGAAATGAAAAAATACATGCCAAGAGAACA  
 TCGTGAATTTCTTTACCATTTGGAATCGGTATGTAATATTCGCGAATACGTTTCTCGTAACG  
 CTTCTAACCGTGCATTGCAAGAGGCCATGGACGTTGCATTTCCATGCTGAAAAATATTTAGA  
 GATAACCACATTCAAATTGTTACCAAGTACAT TATTTTGCCCTCCAATCAAAGCAACACGG  
 CTCCAATAAGCCGAACGTACTAAGTCCAATCGAGCCCAATACCAAAGCAAGTGGTTGTTTAG  
 GGCATAAAGTTGCCCTCATCTAAGACTATCGGAACCGGTGGTACAAGATTAATGCCCTTCTTA  
 AAGCAGTGCAGGGACGAGACTGTCGCCACTGCGGACATTA AAAATGAAGATAAAAAATTGA

>YEL058W 1.79 Hot

ATGAAGTTGATTACGAGCAATTGTGCAA ACTCTACGATGACACGTGCCGCACAAAGAATGT  
 GCAGTTCAGTTACGGTACGGCCGATT CAGAACGCTGGCCAAGAATTTGGATACGGTGATGT  
 TCAGTACTGGTATACTGGCGGTTCTCAGGTCGCTGAAGCTTCAGGGTCAGTATGTGGGGTG  
 ATGATCACGGCGTCGCACAACCATAACCAGGACAACGGGGTCAAGATCGTGGAAACCAGACGG  
 ATCGATGCTTTTGGCCACATGGGAGCCATATGCCATGCAGTTGGCCAATGCGGCCTCTTTTG  
 CCACTAATTTTGAAGAATTTCTGTGTTGAGTTGGCCAAGCTGATTGAACACGAAAAGATTGAT  
 TTGAATACAACCGTCTGCTCCTCACATCGTGGTTGGGAGAGACTCTAGGGAAAGTAGTCCATA  
 CTTGCTGCGCTGCTTGACTTCTCCATGGCCAGCGTCTTCCACGCGCAAGTTTTGGACCTAG  
 GCTGTGTCACTACGCCTCAATTGCATTACATTACTGATTTGTCCAACAGGCGGAAACTGGAA  
 GGAGACACAGCGCCAGTTGCCACAGAACAGGACTACTATTCGTTCTTTATAGGAGCCTTCAA  
 CGAGCTCTTCGCCACGTATCAGCTGGAGAAGAGGCTGTCTGTCCCAAAATTTGTTCATAGACA  
 CAGCCAATGGTATCGGTGGTCCACAGTTGAAAAA ACTACTGGCCTCCGAAGATTGGGACGTG  
 CCAGCGGAGCAAGTTGAGGTAATCAACGACAGGTC CGATGTTCCAGA ACTGTTGAATTTTGA  
 ATGCGGTGCGGATATGTGAAGACTAACCAGAGATTACCCAAGGGTCTTTCTCCATCCTCGT  
 TTGATTCGCTATATTGCTCCTTTGATGGTGACGCAGACAGGGTTGTGTCTACTATGTGAC  
 TCAGGATCAAAATTTCAATTTGTTGGATGGTGACAAAATTTCCACTTTGTTGCAAAGTTCTT  
 GTCTAAACA ACTAGAATTGGCACACCTAGAACATTTCTTTGAAGATTGGTGTGTGCAA ACTG

CCTATGCAAACGGCAGTTCCACCGCTTACATAAAAAATACGTTGCACTGTCCCCTGTCTTGC  
 ACTAAGACAGGTGTTAAACACTTGCATCATGAAGCTGCCACTCAGTACGATATTGGCATTTA  
 TTTGCAAGCAAATGGACATGGTACGATTATATTCAGCGAAAAATTTTCATCGAACTATCAAAT  
 CTGAATTATCCAAGTCCAAGTAAATGGTGATACGTTAGCTTTGAGAACTTTGAAGTGTTC  
 TCTGAATTGATTAATCAGACCGTGGGAGATGCTATTTTCAGACATGCTTGTCTCCTTGCTAC  
 TTTGGCGATTTTGAAAATGTCGCCAATGGATTGGGATGAAGAGTATACTGATTTGCCCAACA  
 AGCTGGTTAAGTGCATCGTTCCCTGATAGGTCAATTTTCCAAACCACGGACCAGGAAAGAAAA  
 TTGCTCAATCCAGTGGGGTTGCAAGACAAGATAGATCTTGTGGTAGCCAAGTATCCCATGGG  
 AAGAAGCTTTGTCAGAGCCAGTGGTACGGAGGATGCGGTGAGGGTTTATGCGGAATGTAAGG  
 ACTCCTCTAAGTTAGGTCAATTTTGTGACGAAGTGGTGGAGCACGTTAAGGCATCTGCTTGA

>YNL125C 1.67 Hot

ATGTC AACGCACTCAAACGACTACTTTTTCTGCTTCTTCCGGAATGGTCTCTGAGACATCGTC  
 CGAGGTTTTCTTCGATAAACTCTTCACAGCCTGTATCATTCTCTAAGGCTTCTATTGCTGCTC  
 CGGTTCCATGCTCTGATCTACACAGCACCAAGTCGAACGATGCATCGAGAAAATTGCTTATT  
 AGTAGGACGTTAACTAATCGGCTCAACGACATTA AAAAAGGCTGTCGATGACGACAACTTGCA  
 GACGGAAGAAAATTCGCGAGACGTTAATAAAAATATTAGAATCTAGATTTGACGTGGCCGATG  
 CCATTAGGCTACAGCACAATGAGTCAGTCCAGTCAAAGTTAAACATCCAGTCACACACACC  
 ACGACTGCAGGCGCCTCGTTGTCGGCACCATCTTCCTCTGCTTTCTCTGCTTCTTCTATTCA  
 AAAATGATACTACAGAACATAAAAGCTTCCATGGACTCCAAACTCATGAGGAATAGACTATATC  
 CGGCTTCCACGAAACACTCCGGTAAGGATCTTGAGGCCCAAGGAATAACCGAATTCGAGCCT  
 GATGAACCGACTGTAAAAAAGTATTCACCAACAAGTCTACCGGGCAGCTGGAAGTCCCC  
 CGACGGTGGTTATGGCTGGGTGCTGACATTTCTGTGTGTTCTTGACCATGTTTTCCACGTGGG  
 GCTGCAACGCATCCTTCGGTGTGACCTTGCCACTACTTAAACCATGATACTTACCCTGGT  
 GCTTCGAAGTACGATTATGCCTTAATTGCTGGCCTAACTGTCTTTCTCGGTCAACTCTTATC  
 CCCCCTTGATGGCACTGATGAGAATAATTGGTCTGCGGACCACCATGCTTTTTTGGTGATG  
 CTGTAATGCTTGCCGCATATCTCTTGGCCTCCTTTACTACCAAGTTATGGCAATTGTATGTC  
 ACCCAAGGTTTTATGGTTCGGTTGTTCAATATCACTGATTTTTCGTTCCAGCAACAACCGTCTT  
 ACCAGGATGGTTCTTGAAAAAAGAGCTGTCGCAATGGGTGTCCTCATTATTGGGTACCGGTG  
 CTGGTGGTGTGCTTTACGGTTGGCTACAAACAAAATGCTTTCTGACTTTGGAAATACCCGG  
 TGGTGCCTTCGTATCATAGGCATATCGTGTAGCATAAGTGTCTAGTTGCTATTGCGCTCTT  
 AAAAGAAAGAAACCCTACACCTGCCATAGGATTGAAATCGCCTCGGGCCATGTTTGAACAGC  
 TCAAAGCAATGTTTTTCATTAAAGGTTATAACTAAGCCATTTGTGGTACTTATTGCATTATGG  
 TTCATGTTTCGCATTATTTGCCCTACAATATGATGGTTTTTTACTTTATCTTCATACGCAATCTC  
 GAAAGGATTATCATCGCACGACGCTTCCACATTTGACTGCCATTTTGAACGGCTCGCAATCCA  
 TCGGAAGACCTCTGATGGGTTTAGCGGGAGATAAGTTTGGTAGGGCAAACGTAACGATCGTA  
 TTAACCACTTTGTTAACAATATATATGTTTGCCTTCTGGATCCCCGCTCATACTTTGTTCA  
 ACTCATCTTTTTTTCAATTCTAGTTGGCTCATGCGTTGGTGTGCGCAACGTCATGAATACCG  
 TTCTGATTGCCGATATGGTTAAACCAGAAGAGTTTTTTGCCCGCTTGGGCCCTTCGTCACCTAC  
 TGTGGTGCACCTTCTTATTGGTTTTGTGAGGTGATTGCCAGGCATTGACGGTGGAGAAAGA  
 TAAGAGCAATCCTTACTTACATGCACAAATTTTTTGCCTGCTGCTTTATTGCCGCACTAA  
 TTTTAATTTCTATCCTTCGTGAATATTCTATCAGGATGAAATTAACGGAAAGACAAGCTATG  
 ACAACGAGAAGTTAAAAGAAATGGAAGGCAAGCGAATACGATACCGATTCTGCCGATGAAGA  
 TTGGGGTAAATTAAGAAGAAAGAAAGACTAAATATGACCTCTTTTAGGTCCGGGCATTA AAA  
 AATACTTCCCTAAGAATGGTATATCCAATGAAGGTCTAG

>YEL045C 2.13 Hot

ATGAAATGTCACGCGAAACGGACCCTTGCCTTTTTGGCGACGGCACTTCCCCTATCTGGAAA  
 AAGCCGAGCATGCACCCGTACCCACAAAGCTTCGCTTCCGGTTTCCGGGCAGCAGCGCCGT  
 TTCTTTTTTCCCCTGCTTCGCCCTTTGTATTACTCATTGCGCACTTTTCACTTGCCATAT  
 TCGTTCACCGGTTTTTCTTTTTATTCTTCGTCTTTTTTCTGCTTTTTTCTTCACTGGATATA  
 CGCTTTTTTGCATTTGCAATAGCACATATGTGTATATATAAAGCAAGTGTGAGCTTGCCCTG  
 TCAAATCCTCCATGTGTCCTTCTCGTCTATCTTGTCTGCTGTTGTTATAGAGTAATACTTACA  
 TACATATACGTACATTGTTTCCGCTGGCTAGTTTCGTAACCACCTCCTTTCCTAG

>YJR147W 1.61 Hot

ATGGATGCAACATCGAGGATGGAGCAGCCTGATGTCTTTGTAAGCAAACCTCTACCACCTGCT  
GCAGGGGAACGCTTACTCGAACATAATAACAATGGTCGACTGATGGCAGCAAGCTCGTCATTT  
GGAATCCGGACCAGTTCACCAAAGTCATCCTAGAGCGATTTTTTTGGTATTCACACCTTTGCA  
GCATTCGTTAAGCAATTGAGCAAATATAACTTCCAGAAGGCGGGCCCGCCGACTGCGTGGA  
GTTTTCCAACATTCATTTTTCAAAAAGATAACATTAATAGCCTCTCACTGGTTAAAGCTCATC  
AGTCTGCCGCCACTCCCAATGTCGCCGCCGTCATAATATGAATAAGCAGTGTACTTTTCAC  
TGGGACCCTTTCAAAGTGAACCTCATTCTAAGCAAGGCCATCGGCAAGCCTTCCTTCGAGAA  
ATTAGTGA AAAATGTTGACAGGCTTCAGGGCAATCTTGATGAGCTTAAGTCGACAAACGCAG  
ATAGTCTGCGTATTATAAGGGAAATTAACGCCAGCTTACAGACAATCTCCTACCACCAGTTT  
CACGCCTACCAAACCGCTAACTTCCTTCAAGAAAATTTTGAAGCCATCAAAAAGGTTGTATG  
CCCGACTCTTGTCTACAACACCAGCAACGCCAACCAAGCGCCCCAAACGCTACTCGTTGC  
TGTTACTAATAACCAAACGCATCCGAATTGTCAGAAACACCTTTGATGCGCTTCGCCGGCGTG  
TTCGAATTTATGAACTGCTCTTTGGATACGGCCACTCAGTGGCACCCGCGAGTTGCATCCCGA  
GGCATAACGACCTTCTTTTCGTCACCGTGTGCCCCAACATGCAACAAGAACATCTCATCTACT  
TCAAGAGACTGAGAAACCTACTCCCAAGCTTTCCTGTAATAGCCATTATTAACAGACCCGTC  
TCCCCTCAAGATAACAGCATTGCTCCCTCCAACCTACTCTCGCTATTATTTCCACCATTTTTT  
GCAGTTGGGGTTCAGTGACATCCTAGTTAGCCCCTTCACCCCAACACAACCTTATAACGCTCC  
TTTCCAACATCTTCGAACGTGA

>YKR012C 1.71 Hot

ATGAACGTCGTTAGAGTCTGGCCATTTTTCTACACGAACTATACCTTGTACCCTACAGTGGC  
AGCTTGGTGGACATGTTGCGTGACAGTCACAGCAACTGGGGCAGATAAAAGCGACAGATGCAG  
ATGCGGCCAGTAGTGAGACTTTAGAAAATTTTCATCTTTGTAAGTTTTATTAAAGGAATGGTA  
TTGTTTTATGATGGGCTGTTTCGAGGAACGATGATACCAAGAGCCAACAGATCCATCACAGC  
AATATGTAACACTCTGCGACAAGCATATATATATACAAAAGATCCAAAGCATTGCCTTTGAAC  
GACGTCTATGTTTCCAAAACATTACATATAGAGAAGTGCGTGAGATACACGAAATGTACTGT  
AAATAG

>YIL136W 1.61 Hot

ATGTCATCAAGAATAATTGTCGGCAGTGACAGCATTGGCAGCTGCCATCACAGCTAGCATCAT  
GGTCAGAGAACAGAAGGCCAAGGGTCAGAGAAGAGAGGGCAACGTCTCCGCTTACTACAACG  
GCCAGGAGTACGGCAGTTCAGCACCCCCACAGTTGGGAAAGCTACATAACATAAAGCAAGGC  
ATAAAGGAAGATGCCCTTGTGCTTAAAAGACGCGCTTCTGGGCGTATCTCAAAGGCTAGGGA  
AGAGGCTCCAAAGGTAACCTAAGCGTGTGATATCACCGGAAGAGGATGCTCAGACACGCAAGC  
AGCTAGGCCAAAAAGCCAAGGATTCCTTCCTCGCAAAGCATCTTCAATTGGGGGTTTAGTGAG  
GCTGAAAGAAGGAAAGCCATAGCCATCGGGGAATTTGATACTGCTAAGAAGCGTTTCGAAGA  
GGCAGTGGATCGTAATGAGAAGGAGCTCTTGTCCACGGTGATGAGAGAGAAGAAGGCCGCTC  
TGGACAGAGCATCCATTGAGTACGAAAGGTACGGGAGAGCCAGAGACTTTAATGAGCTTTCG  
GACAAGCTAGACCAACAGGAAAGGAACAGTAATCCTTTGAAACGCCTGTTGAAGAATAACAC  
GGGTGACGCTAATACTGAAGAAGCCGCTGCAAGAAGTGTCGAAGGCTGGGGTGATACGGCAC  
AGGAGTTTTGGTAGAGAAGAGTTGGAGGAAGCCAAGAGAAATGCTTCTTCAGAGCCAAGCGAG  
GCGCAAAAACGCTTTGACGAGCTGAAGAAGATCAAGGAAAAGGGCTGGTTTGGTTACAACAA  
AGGGGAGCAAAGCGAGCAACAGATTGCTGAACGGGTAGCCAGAGGTTTAGAAGGATGGGGTG  
AAACAGCCGCTCACTTTCCAAGGACGAAATGGACGATTTAAGATGGAATTATGAGAATTCA  
AAGAAACAACTGGATAAGAACGTGTCCGATGCCATGGACTCGTTATCTAAGGCCAAGGAGGA  
CTTGAACAGTACGGCAGCCACTGGTGGTCTGGATGGACTTCCAAGGTCGACAATGACAAGC  
AGGCTTTAAAAGATGAGGCCCAAGAAGTACGATGAAGCGTTGAAAAGTACGATGAAGCC  
AAGAACAATTCAAAGAATGGAATGATAAGGGTGATGGTAAATCTGGAGCTCGAAAAAGGA  
CTAG

>YGR204W 1.69 Hot

ATGGCTGGTCAAGTGTGGACGGCAAAGCATGCGCTCAGCAGTTTAGAAGCAATATTGCTAA  
TGAAATCAAAGCATTCAAGGTCACGTGCCCTGGGTTTTGCACCTAACCTGCCATCATTCAG  
TAGGCAACAGACCAGACTCAGCCACATATGTACGCATGAAGCGTAAGGCAGCTGAAGAGGCC  
GGCATTGTTGCTAATTTCAATTCATTTAGATGAATCCGCTACTGAATTTGAAGTTCTGCGTTA  
CGTGGACCAGCTGAATGAGGACCCACATACACACGGTATTATCGTGCAACTACCATTACCCG  
CTCATTTGGACGAGGATAGAATCACCTCGAGAGTGTGGCAGAAAAGGACGTGGACGGGTTT



GGGCCACCAACATTGGCGAATTGAATAAGAAGAACGGACACCCATTCTTTTTGCCCTGCAC  
GCCAAGGGGATCATTGAGCTGCTTACAAAGCCAACGTCACGATTGAAGGTTCCCGGTCCG  
TTGTGATCGGAAGATCTGACATTGTTGGCTCTCCTGTTGCAGAATTGTTAAAATCTCTAAAC  
TCCACCGTCAACATCACTCATTCTAAAACCCGTGATATCGCATCATACTTACACGACGCGGA  
CATCGTAGTTCGTTGCCATCGGCCAACCAGAATTTGTGAAGGGTGAATGGTTCAAAACCAAGAG  
ACGGCACTTCCAGTGATAAGAAAACCGTGGTAATTGATGTTGGCACCAACTACGTTGCTGAT  
CCTTCCAAAAGTCCGGTTTCAAATGTGTTGGTGACGTTGAGTTCAATGAAGCAATCAAATA  
CGTCCATCTAATCACTCCAGTGCCCGTGGTGTGGGCCCATGACGGTGGCTATGTTAATGC  
AAAATACCTTGATTGCTGCCAAACGCCAAATGGAAGAATCCTCGAAGCCTTTCAGATTCCCT  
CCCTTGCCATTGAAGTTGCTAACACCTGTTCCCTCCGATATAGACATCTCCAGAGCACAAACA  
GCCAAAGCTTATCAACCAGCTTGCTCAAGAATTGGGTATTTACTCTCATGAGTTGGAGCTGT  
ACGGACATTACAAGGCCAAAATTTCTCCTAAAGTCATCGAAAGGCTGCAGACGCGCCAAAAT  
GGTAAGTACATCTTGGTGTCTGGTATCACACCAACACCACTGGGAGAGGGTAAATCCACTAC  
AACAAATGGGTCTTGTCCAGGCACCTAACGGCTCACTTGGGCAAGCCAGCCATTGCGAACGTCA  
GACAACCTCCCTAGGACCCACTTTAGGTGTCAAAGGTGGTGTGCGGGTGGTGGTTATTCC  
CAAGTCATCCCAATGGACGAATTCAACTTACATTTGACTGGTGACATTCACGCCATTGGTGC  
GGCTAACAAACCTACTTGCTGCCGCTATTGACACTAGAATGTTCCATGAGACCACTCAAAGA  
ACGACGCTACCTTCTACAACAGACTAGTGCTTAGAAAGAACGGAAAGAGAAAAGTTTACTCCC  
TCCATGCAAAGAAGATTGAACAGACTGGGTATTCAAAAGACCAACCCCGATGATCTAACACC  
CGAAGAGATCAACAAATTCCGCCAGATTGAACATTGACCCGGACACTATTACTATCAAGAGGG  
TGGTCGATATCAACGACAGAATGTTAAGACAAATCACCATTGGTCAAGCCCTACCGAGAAG  
AACCACACAAGAGTTACTGGATTTCGATATCACCGTTGCTTCTGAATTGATGGCTATTCTTGC  
TCTTTCAAAGGACTTGAGGGACATGAAGGAACGTATTGGAAGAGTCGTTGTTGCTGCTGACG  
TAAACAGGTCTCCAGTCACTGTTGAAGATGTGGGTTGTACCGGTGCCTTAACCGCTTTATTA  
AGAGACGCTATCAAGCCCAACTTGATGCAAACCTTAGAAGGTACTCCTGTCTTGGTCCATGC  
CGGCCATTTGCCAACATCTCTATCGGTGCCTCTTCTGTTATTGCTGATCGCGTGGCTTTGA  
AATTGGTTGGTACCGAGCCAGAGGCCAAAACAGAAGCTGGTTATGTGGTTACTGAAGCAGGG  
TTCGATTTCACTATGGGTGGTGAAGATTCTTCAACATCAAGTGCCGTTCCCTGATTGAC  
ACCTAATGCTGTGGTCTTGGTTGCTACTGTTAGGGCATTGAAGTCACACGGTGGTGTCCAG  
ATGTCAAACCTGGCCAACCTTTACCTTCCGCATACACTGAAGAGAATATCGAGTTTGTGCAA  
AAAGGTGCCGCTAACATGTGTAAACAAATTGCCAACATTAAGCAATTTGGCGTCCCCGTGCT  
TGTCGCAATTAACAAGTTTGAACCTGACACTGAAGGTGAAATAGCCGCCATTAGAAAAGCCG  
CTTTGGAAGCTGGTGCATTTGAAGCCGTAACCTCTAACCATTTGGGCCGAAGGTGGTAAAGGT  
GCTATCGACTTGGCCAAGGCCGTCATCGAAGCTTCCAACCAACCAGTGGACTTCCATTTCCCT  
ATATGACGTTAACTCCTCCGTTGAAGACAAATTAACTACTATCGTTCAAAGATGTACGGTG  
GTGCCGCAATCGATATCTTGCTGAAGCACACGCAAGATTGACATGTACAAGGAACAAGGT  
TTCGTAACCTTGCCAATTTGTATCGCCAAGACACAATACTCTTTATCCCACGATGCAACTTT  
GAAAGGTGTTCCAACCGGGTTCATTTCCCCATCAGAGACGTCAGATTGTCTAATGGTGCTG  
GATACTTATACGCTCTTGGCCGCGAAATACAAACCATTCTGGTTTGGCTACCTATGCTGGT  
TACATGGCCGTGGAAGTCGATGATGACGGTGAGATCGATGGCCTGTTCTAA

>YJL175W 1.64 Hot

ATGTTTTTAACGTCACCAATTTGAATCCTGTATTGTGCTGCTTTCCTTAATAGCAGGCTTATT  
GTTTTCAATTGTCTACCGGGTTCGTAGGTATACTAGGAGTGTTCCTCATTTGTTGAAACAG  
AACTCTCGGTTTCGCCAAAGAGATTATCACTATCCTCATTTATCTTGGCCAAAGACGTTCTGG  
GCCCTGCTTTCTCTGTAGAAAGGTGTTTCTGGGAATCTAGCTTATTGCTTGCATAGTCGG  
CTGCTGCTTTGCCGTTACCGTTATCGCCTCACTTCTGCATCGCGTGTGTTCCGGAACAGTTG  
CTTCATCCTTCAGAGACTCATCTTGTGCTGCGATTCTTCACCAGCAGTATCTGTATTGGCA  
ACCCCTGCCACAGCTGCATTAGCGTTGCTATCACTATTGTTGTGCTATTGCCATGTTGGTCCAC  
GTCCACGGAAGCGTTTACCGTGGACCCCTCACCCAGTGTATTCTCCATGCTTGCAAAACCGTA  
TCACAATTTGGTCTCTGA

>YGR248W 1.78 Hot

ATGGTGAATTAACAAGGTTTAGCGAAAAGAAAAGCCTCATACACGAATTCGGCAAGTTTAT  
CCTTGAAAAGCAAGAATCGGCGTTAACGGGCGACGCTGATGCAGTGTTCATATCGCCATCA  
GTGGAGGATCGATGAACCAAGCGCTGTACGAAAGTTTGGTAAATGACAAAACATTTTCCA  
CATATTAAGTGGCCACAATGGAGAATCTTCTTCTGTGACGAAAGATTGGTTCATTTGAGGA

TCCGCAAAGTAACTATGGTCAGTTCAAAAAACAGTTTTGGACCCGCTAGTGCATCAGGGCA  
 ACCAATTGAACTTAGGCCCCACTGTATACACTATCAACGAATCATTAATCGGTGGCGGTGAA  
 ACGGCCAATAGAAAGATTGCCGAAGAATACGCTTCCATGCTGCCTGCATCATTCGACCTAAT  
 CTTACTCGGATGCGGAGAAGATGGACATACATGCTCGTTGTTTCCCGGGGTTGAATTTAATT  
 ACCTTGTAGAAGAGATGGACCGCAAGTTTTATGGTGTAATAATTCGCCCAAGGCACCCAAG  
 GACAGGATCACCTTTACATTAGCAGTAGTAGCCGAGGCTAAAAGTGTGTGCTTTCTCGTTAG  
 GGGAGCTGCTAAAAAGGCTATCATGCATGACGTGTTAATCGTAAAAAATAGCGAACTACCTA  
 GTGTGCTGGTTAATGAAATGGTCGGAACCAAAGTAACTTGGTTTTCTCGACGACGAAGCTGGC  
 GCCTTGATTCCCTGAAAACCTGCTAA

>YFR026C 1.89 Hot

ATGACGCCCTATGCAGTAGCAATTACCGTGGCCTTACTAATTGTAACAGTGAGCGCACTCCA  
 GGTCAACAATTCATGTGTGCTTTTTCCGCCATCAAATCTCAGAGGCAAAAATGGAGACGGTA  
 CTAATGAACAGTATGCAACTGCACTACTTTCTATTCCCTGGAATGGACCTCCTGAGTCATTG  
 AGGGATATTAATCTTATTGAACTCGAACCGCAAGTTGCACTCTATTTGCTCGAAAATTATAT  
 TAACCATTACTACAACACCACAAGAGACAATAAGTGCCCTAATAACCCTACCTAATGGGAG  
 GGCAGTTGGGTAGCTCATCGGATAATAGGAGTTTGAACGATCCGCAAACGATGCTATGGCCG  
 GAAAAGAAGGAAGACGAAAAAACTGCCAAGAACTTTTTAAAGGGGCTGTTTCGTGTACCAA  
 AAGGTTTTGCAAGGTTATTTCTCTGTAAATATTTTTGGGATAAACCTGAATATATCTTATA  
 GCTCTGGAAAGTGA

>YDL182W 1.79 Hot

ATGACTGCTGCTAAACCAAATCCATATGCTGCCAAACCGGGCGACTATCTTTCTAATGTAAA  
 TAATTTCCAGTTAATCGATTTCGACGCTGAGAGAAGGTGAACAATTTGCCAACGCATTCTTCG  
 ATACTGAAAAAAGATCGAAAATGCTAGAGCCTTGACGATTTTCGGTGTGGACTACATCGAG  
 TTAACCTCACCAGTAGCATCTGAACAATCAAGAAAGGACTGTGAAGCTATATGTAAACTAGG  
 TTTAAAGGCCAAGATCCTTACACACATTCGTTGTCATATGGATGACGCCAAAGTCGCCGTAG  
 AGACTGGTGTGACGGTGTGATGTCGTTATCGGCACCTCCAAATTTTTAAGACAATATTC  
 CACGGTAAGGATATGAACTACATCGCCAAGAGTGCTGTTGAAGTCATTGAATTTGTCAAATC  
 CAAAGGTATTGAAATCGATTTTCCTCTGAAGATTCCTTCAGAAGTGATCTCGTTGATCTTT  
 TGAACATTTATAAAACCGTTGACAAGATCGGTGTAATAGAGTCGGTATTGCCGACACAGTT  
 GGATGTGCCAACCCAAGACAAGTATATGAACTGATCAGAACTTTGAAGAGTGTGTTTCATG  
 TGACATCGAATGCCATTTCCACAACGATACTGGTTGTGCCATTGCAAACGCCTACACTGCTT  
 TGGAAGGTGGTGCCAGATTGATTGACGTCAGTGTACTGGGTATTGGTGAAAGAAACGGTATC  
 ACTCCTCTAGGTGGGCTCATGGCAAGAATGATTGTTGCCGCACCAGACTATGTCAAGTCCAA  
 ATACAAGTTGCACAAGATCAGAGACATTGAAAACCTGGTCGCTGATGCTGTGGAAGTTAACA  
 TTCCATTCAACAACCCTATCACCGGTTCTGTGCATTACACATAAAGCAGGTATCCATGCC  
 AAGGCCATTTTGGCTAACCCATCTACCTACGAAATCTTGGACCCTCACGATTTTCGGTATGAA  
 GAGGTATATCCACTTCGCCAACAGACTAACTGGCTGGAACGCCATCAAAGCCAGAGTCGACC  
 AGTTGAACTTGAACTTGACGGATGACCAAATCAAGGAAGTTACTGCTAAGATTAAGAAGCTG  
 GGTGATGTCAGATCGCTGAATATCGATGATGTTGACTCTATCATCAAGAACCTCCACGCAGA  
 GGTGACACTCCTCAAGTACTATCTGCAAAAAAGAACAAGAAGAATGACAGCGATGTACCGG  
 AACTGGCCACCATCCCCGCCGCCAAGCGGACTAAGCCATCCGCCTAA

>YAL038W 3.27 Hot

ATGTCTAGATTAGAAAGATTGACCTCATTAACGTTGTTGCTGGTTCTGACTTGAGAAGAAC  
 CTCCATCATTGGTACCATCGGTCCAAAGACCAACAACCCAGAAACCTTGGTTGCTTTGAGAA  
 AGGCTGGTTTTGAACATTTGTCGGTATGAACTTCTCTCACGGTTCTTACGAATACCACAAGTCT  
 GTCATTGACAACGCCAGAAAAGTCCGAAGAATTTGTACCCAGGTAGACCATTGGCCATTGCTTT  
 GGACACCAAGGGTCCAGAAATCAGAACTGGTACCACCACCAACGATGTTGACTACCCAATCC  
 CACCAAACCACGAAATGATCTTCACCACCGATGACAAGTACGCTAAGGCTTGTGACGACAAG  
 ATCATGTACGTTGACTACAAGAACATCACCAGGTCATCTCCGCTGGTAGAATCATCTACGT  
 TGATGATGGTGTGTTTGTCTTTCCAAGTTTTGGAAGTCGTTGACGACAAGACTTTGAAGGTCA  
 AGGCTTTGAACGCCGGTAAGATCTGTTCCCACAAGGGTGTCAACTTACCAGGTACCGATGTC  
 GATTTGCCAGCTTTGTCTGAAAAGGACAAGGAAGATTTGAGATTCGGTGTCAAGAACGGTGT  
 CCACATGGTCTTCGCTTCTTTTCATCAGAACCGCCAACGATGTTTTGACCATCAGAGAAGTCT  
 TGGGTGAACAAGGTAAGGACGTCAAGATCATTTGTCAAGATTGAAAACCAACAAGGTGTTAAC

AACTTCGACGAAATCTTGAAGGTCCTGACGGTGTATGGTTGCCAGAGGTGACTTGGGTAT  
 TGAATCCCAGCCCCAGAAGTCTTGGCTGTCCAAAAGAAATGATTGCTAAGTCTAACTTGG  
 CTGGTAAGCCAGTTATCTGTGCTACCCAAATGTTGGAATCCATGACTTACAACCCAAGACCA  
 ACCAGAGCTGAAAGTTTCCGATGTCGGTAACGCTATCTTGGATGGTGCTGACTGTGTTATGTT  
 GTCTGGTAAAACCGCCAAGGGTAACTACCCAATCAACGCCGTTACCACTATGGCTGAAAACCG  
 CTGTCATTGCTGAACAAGCTATCGCTTACTTGCCAAACTACGATGACATGAGAACTGTACT  
 CCAAAGCCAACCTCCACCACCGAAACCGTCGCTGCCTCCGCTGTCGCTGCTGTTTTCGAACA  
 AAAGCCAAGGCTATCATTGTCTTGTCCACTTCCGGTACCACCCAAGATTGGTTTTCCAAGT  
 ACAGACCAAATGTCCAATCATCTTGGTTACCAGATGCCCAAGAGCTGCTAGATTCTCTCAC  
 TTGTACAGAGGTGTCTTCCCATTCGTTTTCGAAAAGGAACCTGTCTCTGACTGGACTGATGA  
 TGTGAAGCCCGTATCAACTTCGGTATTGAAAAGGCTAAGGAATTCCGGTATCTTGAAGAAGG  
 GTGACACTTACGTTTCCATCCAAGTTTTCAAGGCCGGTGCTGGTCACTCCAACACTTTGCAA  
 GTCTCTACCGTTTAA

>YBR222C 1.59 Hot

ATGACAAGTGCCGCTACTGTTACTGCTTCGTTCAACGATACTTTTTAGCGTATCCGATAATGT  
 CGCCGTTATTGTTTCTGAAACGGACACTCAGGTGACCTACAGGGATCTATCCCACATGGTGG  
 GTCAC'TTCCAGACCATGTTTCACAAATCCTAAT'TCTCCATTGTACGGAGCTGTTTTTCAGACAA  
 GATACAGTGGCGATATCCATGCGTAATGGGCTGGAATTTATCGTCGCTTTCCTCGGTGCTAC  
 TATGGACGCTAAAATTGGCGCGCCCTTGAATCCCAATTATAAGGAAAAGGAGTTCAATTTTT  
 ATTTGAATGACCTGAAATCTAAGGCGATTTGCGTCCCAAAGGGTACCACAAAGTTACAGAGT  
 TCTGAAATTTCTAAAATCTGCCCTCCACGTTTGGATGTTTTATCGTAGAGCTGGCCTTCGATGC  
 GACCAGTTTTAGGGTAGAGTATGATATATACTCTCCAGAGGACAACCTACAAAAGGGTTATTT  
 ACCGGTCTTTGAAACAACGCCAAAATTTGTCAACACAAATCCCGTTAAATTCCTGGGTTTGCC  
 CGTTCAGTGACGTTGCCCTGATTTTTGCATACCAGTGGTACCACCTCCACTCCAAAAACGGT  
 GCCTTTGTTACATTTGAACATTTGTGAGAAGCACGTTGAACATTTGCTAACACTTACAAGCTAA  
 CGCCCTTGACAGATCTTATGTCGTGATGCCCTTTTTTCCACGTCCATGGGTTAATTGGTGT  
 TTACTTTCCACTTTTAGAACTCAGGGTTCTGTTGTGGTTCCCGATGGATTCCATCCAAAGTT  
 ATTCTGGGACCAATTTGTTAAGTACAACCTGTAATTTGGTTTCCGATGGATTCCATCCAAAGTT  
 TGATTATGCTGAACATGCCCAAACCAACCCCTTTCCACACATTAGATTTCATCAGATCGTGT  
 TCTTCTGCTTTGGCTCCAGCAACGTTCCATAAGCTGGAGAAGGAATTCATGCACCTGTCTT  
 GGAGGCCTATGCGATGACCGAAGCATCACATCAAATGACCTCAAACAATCTGCCTCCAGGAA  
 AGAGAAAGCCTGGTACTGTGGGCCAGCCACAAGGAGTCACCGTCGTCATTCTAGATGACAAT  
 GACAATGTCTTGGCCCCGGGCAAAGTCGGCGAAGTTTCCATCAGAGGGCGAAAACGTCAC'TTT  
 GGGTATGCTAATAATCCAAAAGCTAACAAGGAGAAC'TTCCAAGAGAGAGAACTATTTCA  
 GAACCGGTGACCAAGGTTATTTTCGACCCTGAGGGGTTTTTGGTCTTACAGGCAGAATCAA  
 GAGCTTATCAACAGGGGTGGTGAAGAGATTTCAACCATTTGAGCTCGACGGCATTATGCTATC  
 GCATCCAAAGATCGATGAAGCCGTTGCATTTGGTGTTCCTCGACGATATGTACGGCCAAGTAG  
 TTCAAGCCGCCATTGTTTTGAAGAAGGGAGAAAAAATGACCTACGAAGAAGTGGTGAAC'TTC  
 TTAAGAAGCACCTAGCCTCTTTCAAATTTCCAACCAAGGTGTACTTTGTTGATAAGCTACC  
 AAAACCGCTACAGGTAAAATCCAGAGAAGAGTTATCGCAGAAACTTTTGCTAAGAGCAGCA  
 GAAATAAGAGTAAGTTGTAG

>YCR050C 1.96 Hot

ATGGTGGCAGTTCATAAGGTCAGGTACAACGTCATAATGATACTGGGCCCTGAACAGACACC  
 AAACGAAAAGACAACGTTGGACAACCTGCGGTCTTGCCCGTAGAACTTGGTGTGCTCAAAG  
 CAGTCCACACAAACTGCGACAGTTGGAACATGAACAGATATCCTCTAACCTTCTGAAAATG  
 GCGAACATGGCCATTTCTGTTGAACACGGCCTCAAGAAAAAAGTAAATAATGTAGCTTGGCT  
 CTTGCTCAAATGCAATGCGCCATGGAGCTGTGGTACACGTGTCTTAGTAAAAATTTGTGA

>YIL046W 2.5 Hot

ATGAGGAGAGAGAGGCAAAGGATGATGAGTTTCGAGGACAAGGACAAGGACGACCTTGACAA  
 TAGTAATAGTAATAACAGCAGTGAAATGACAGATACGGCGATGATGCCACCATTAAGAGAT  
 TGCTTATTACGGGCAGTAGCGATGATTTGGCACAAGGATCATCGGGTAAGAAGAAGATGACG  
 ATGGCGACGAGGTCGCCATCGTCATCACCCGATTTGGCGACAAACGACAGCGGCCTAGGGT  
 ACAGCCATTGCCAGAATATAACTTCACCAAGTTCTGCTATCGGCATAACCCGGACATTCACT  
 TCTCACCAACTCATACAGCGTGCTACAAGCAGGATTTGAAACGAACGCAAGAGATTAATGCT

AATATCGCGAAGCTACCCCTGCAGGAGCAATCCGACATCCACCACATTATCTCGAAGTACAG  
 CAATTCCAATGACAAGATACGGAAGCTGATTCTGGATGGGATCCTATCGACGAGTTGCTTCC  
 CACAGCTTTCCTACATTTTCGTCACCTCGTTACACACATGATCAAGATCGACTTCATCAGCATT  
 CTGCCGAGGAGCTGTGCGTGAAGATCTTGAGTTATCTGGATTGCCAATCTCTTTGCAACGC  
 CACGAGAGTGTGCCGCAAGTGGCAGAAGCTCGCGGATGACGACAGGGTATGGTACCACATGT  
 GCGAGCAGCACATAGACAGGAAATGTCCCAACTGTGGCTGGGGGCTGCCTCTTTTGCACATG  
 AAACGTGCGCGGATACAACAGAATAGTACAGGATCTAGCAGCAACGCAGATATCCAGACGCA  
 AACTACGCGACCTTGGAAAGTCATCTACAGAGAACGGTCAAAGTGGAGTCAAACCTGGAGAA  
 AGGGCCACTGCAGGATTCAGGAATTCAAGGGCCACATGGATGGTGTGTTAACGCTCCAGTTT  
 AACTACAGGCTTTTGTTCACAGGCTCGTACGACTCCACCATAGGTATATGGGACTTATTCAC  
 GGGGAAGCTAATACGAAGGCTCAGCGGCCATTCGGACGGCGTCAAGACATTATATTTTGACG  
 ATAGAAAGCTGATTACGGGCTCGCTCGACAAGACGATCCGTGTTTGGAACTACATAACCGGT  
 GAATGCATTTCCACGTATCGAGGCCACTCGGATAGCGTTCTGAGCGTAGATTTCATAACAGAA  
 GGTATCGTTTCCGGCAGTGTGACAAGACGGTCAAGGTATGGCACGTGGAGTCCAGGACAT  
 GCTACACCTTGAGAGGCCACACGGAATGGGTAAATTGCGTCAAATTGCATCCGAAAAGCTTT  
 TCATGTTTTAGTTGCAGTGACGATACCACAATCCGAATGTGGGATATCAGGACCAATTCATG  
 CCTAAAAGTGTTCAGGGGTCATGTAGGGCAGGTGCAAAAAGATCATAACCGTTACCATTAAGG  
 ATGTAGAGAATCTAGCCACCGACAACACTTCTGATGGCAGCTCTCCGCAGGATGACCCAACA  
 ATGACTGATGGTGCAGACGAATCAGACACACCGTCAAGCAGCAAGAACTGTCTTAGATGA  
 AAACATACCTTATCCAACACATCTACTATCTTGCGGACTGGATAACACAATCAAACCTATGGG  
 ACGTCAAAACCGGTAAATGCATAAGAACACAGTTTGGGCACGTGGAAGGTGTTTGGGACATC  
 GCCGCTGACAACCTCAGAATTATAAGTGGTTCTCACGACGGAAGCATTAAAGTCTGGGACTT  
 GCAAAGCGGGAAGTGTATGCACACGTTCAACGGTCAAGACTACAAAGAGAACTCAGCACA  
 CACAAACACAATCCTTGGGTGATAAAGTCGCCCTATCGCTTGTGTTTGTATTGGAGATTCA  
 GAATGCTTTAGTTGATGAATTTGGGTGCGTAAAAATGTACAAATTCGATCTCAATGATTA  
 G

>YLR355C 1.92 Hot

ATGTTGAGAACTCAAGCCGCCAGATTGATCTGCAACTCCCGTGTCTACTGCTAAGAGAAC  
 CTTTGTCTTTGGCCACCCGTGCTGCTGCTTACAGCAGACCAGCTGCCCGTTTCGTTAAGCCAA  
 TGATCACTACCCGTGGTTTTGAAGCAAATCAACTTCGGTGGTACTGTTGAAACCGTCTACGAA  
 AGAGCTGACTGGCCAAGAGAAAAGTTGTTGGACTACTTCAAGAACGACACTTTTTGCTTTGAT  
 CGGTTACGGTTCCCAAGGTTACGGTCAAGGTTTGAACCTGAGAGACAACGGTTTTGAACGTTA  
 TCATTTGGTGTCCGTAAAGATGGTGTCTTCTTGAAGGCTGCCATCGAAGACGGTTGGGTCCA  
 GGCAAGAACCTGTTCACTGTTGAAGATGCTATCAAGAGAGGTAGTTACGTTATGAACTTGTT  
 GTCCGATGCCGCTCAATCAGAAACCTGGCCTGCTATCAAGCCATTGTTGACCAAGGGTAAGA  
 CTTTGTACTTCTCCCACGGTTTCTCCCAGTCTTCAAGGACTTGACTCACGTTGAACCACCA  
 AAGGACTTAGATGTTATCTTGGTTGCTCCAAAGGGTTCGGTAGAACTGTCAGATCTTTGTT  
 CAAGGAAGGTCGTGGTATTAACCTTCTTACGCCGTCTGGAACGATGTCACCGGTAAGGCTC  
 ACGAAAAGGCCCAAGCTTTGGCCGTTGCCATTGGTTCCGGTTACGTTTACCAAACCACTTTC  
 GAAAGAGAAGTCAACTCTGACTTGTACGGTGAAAGAGGTTGTTTAATGGGTGGTATCCACGG  
 TATGTTCTTGGCTCAATACGACGCTTGTAGAGAAAACGGTCACTCCCCATCTGAAGCTTTCA  
 ACGAAACCGTCGAAGAAGCTACCCAATCTCTATACCCATTGATCGGTAAGTACGGTATGGAT  
 TACATGTACGATGCTTGTTCACCACCGCCAGAAGAGGTGCTTTGGACTGGTACCCAATCTT  
 CAAGAATGCTTTGAAGCCTGTTTCCAAAGACTTGTACGAATCTACCAAGAACGGTACCGAAA  
 CCAAGAGATCTTTGGAATTCAACTCTCAACCTGACTACAGAGAAAAGCTAGAAAAGGAATTA  
 GACACCATCAGAAACATGGAATCTGGAAGGTTGGTAAGGAAGTCAGAAAGTTGAGACCAGA  
 AAACCAATAA

>YAL042W 1.67 Hot

ATGAAAAGGTCCACGTTGCTGTCGCTGGACGCATTCGCTAAGACCGAAGAGGACGTACGAGT  
 CCGCACCAGGGCCGGCGGGCTGATCACTTTATCGTGCATCTTGACCACGTTATTTCTGCTGG  
 TGAACGAGTGGGGACAGTTCAATTCTGTGGTAACAAGGCCACAATTGGTGGTGGACCGTGAC  
 CGACACGCAAAGCTGGAGCTTAATATGGATGTGACATTTCCATCGATGCCATGTGACCTGGT  
 GAATCTCGATATATGGACGACTCTGGAGAGATGCAACTAGACATTCTTGACGCAGGGTTCA  
 CGATGTCTAGGTTGAATAGCGAGGGTCGCCCGTGGGAGATGCTACTGAGTTGCATGTGGGT  
 GGGAACGGCGACGGAACCGCGCCGGTTAATAACGATCCTAACTATTGTGGGCCATGTTACGG

TGCCAAAGATCAGTCGCAGAATGAGAATCTAGCACAGGAAGAGAAGGTTTGCTGCCAAGACT  
 GTGATGCAGTGAGATCAGCATACTTGGAGGCAGGCTGGGCTTTTTTCGACGGGAAGAATATC  
 GAGCAGTGTGAAAGAGAGGGCTATGTGAGCAAGATTAACGAGCACTTGAATGAAGGCTGCAG  
 GATCAAAGGTTCTGCACAAATTAACAGAATTCAGGGGAATCTTCACTTTGCCCTGGAAAAC  
 CCTACCAGAATGCATATGGACATTTTCATGATACTTCTTTGTACGACAAGACTTCGAATTTG  
 AACTTCAACCACATCATCAATCATTTGAGCTTTGGGAAGCCGATCCAGTCCCACAGTAAGTT  
 GTTAGGAAACGATAAGCGCCACGGCGGCGCGGTAGTTGCCACTTCTCCCTTGGACGGACGCC  
 AGGTGTTCCCGGACAGGAACACACACTTTCACCAGTTCTCGTATTTTGCCAAGATTGTCCCC  
 ACCAGATATGAGTACTTGGATAATGTTGTCAATTGAGACCGCGCAGTTCAGCGCCACTTTTCA  
 TTCCCGACCTCTTGGCGGTGGAAGGGACAAGGATCATCAAACACACTTCACGTTAGGGGTG  
 GTATCCCTGGTATGTTTCGTCTTTTTCGAAATGTCTCCATTGAAAGTCATCAATAAGGAACAG  
 CACGGGCAGACTTGGTCGGGCTTCATCTTGAATTGTATCACCAGCATTGGTGGTGTCTTAGC  
 TGTGGGCACTGTTCATGGACAAGCTATTCTACAAAGCACAGAGATCGATCTGGGGCAAGAAGA  
 GCCAGTAG

>YPR039W 1.7 Hot

ATGGCTTCTTTTACTATCTGTTTCATCCCTTCGTTCCCTTGCACAATCTGTCCAGACTTTCC  
 TCTTTACAAATCACCAGCCTTCCCGTCTTCTTGTCTTCATCACCACGTTTATTGTTAATG  
 ATAAAGCCTTTTGTCTTTATTTTTGGTTCCCTTTTCCCGCTTCGTTTACCAGGTGGTTAAC  
 TTTCTCTTCCATCTTGTAAATATAATAACAAAATGCATCACCATACTTACGCACCCCATAT  
 ACATGACCTAAGGGCAGCTTTAGACACAACAGCTCCCCAGAAAAAATGTCCAAAAGAAACAC  
 TCCACCGCTCAGATCATCAGGGATAA

>YEL077C 1.52 Hot

ATGACGCTTGGTAACAGTTATGACGCTTTTTAATCATGATCCTTGGATGGATGTGGTGGGATT  
 TGAGGATCCAAATCAAGTAAACAAATCGAGACATTTTCGAGGATAGTTTTGTATTCTACATGT  
 TTCTGAATACCGCGAAGGGCTGTCTGGTTGAATACGCAACTTTTCGGCAGTACATGAGGGAA  
 CTTCCGAAGAATGCACCTCAGAAGCTGAATTTTCGGGAGATGCGTCAGGGGTTGATTGCCCT  
 AGGACGGCACTGCGTAGGTAGCAGATTTGAAACAGATTTGTACGAGTCCGGCAGCAGTGAAC  
 TCATGGCCAATCATTCGTTCAAACAGGGCGAAATATTTACGGTGTGGATTCTTTTTCGTTA  
 ACTAGTGTGAGTGGGACGACCGCCACTTTATTGCAGGAACGAGCTTCCGAGCGCTGGATTCA  
 ATGTTTAGGCCTTGAAGCGACTACCATTGTTTATTCTCTAGTACTCGGAATGCGGAAGACG  
 TAGTGGCAGGTGAGGCGGCGAGTTCAGATCATCACCAAAAAATCTCAAGAGTAAACGCGAAAA  
 AGGCCCCGAGAGCCCAAGAGTACAACGATATCCTCGTTGCAGGCCAGAACTCTTTGGCAG  
 CTCTTTTGAATTCAGGGACTTGCATCAGTTGCGCTTATGTTATGAAATATACATGGCAGACA  
 CACCCTCTGTGGCAGTACAGGCCCCACCGGGCTATGGTAAGACGGAGTTATTTTATCTCCCC  
 TTGATAGCACTGGCGTCTAAGGGCGACGTGAAATATGTGTCGTTTCTGTTTGTACCGTACAC  
 AGTGTGCTTGTCTAATTGCATGATCAGGTTGGGCCGATGCGGTTGCTTGAATGTGGCCCCTG  
 TAAGAACTTTTATTGAAGAAGGTTACGATGGCGTTACTGATTTATACGTGGGGATCTACGAT  
 GATCTTGCTAGCATAATTTACAGACAGGATAGCTGCGTGGGAGAATATTGTTGAGTGCAC  
 CTTTAGGACCAACAACGTAAAATTGGGTTACCTCATTGTAGATGAGTTTCAAACTTTGAAA  
 CGGAGGTCTACCGGCAGTCGCAATTTGGGGCATAACTAACCTTGATTTTGACGCTTTTGAG  
 AAAGCAATCTTTTGGAGCGGCACAGCCCCGTGAGGCTGTAGCTGATGCTGCGTTGCAGCGTAT  
 TGGGCTTACGGGACTGGCCAAGAAATCGATGGACATCAACGAGCTCAAACGGTCGGAAGATC  
 TCAGCAGAGGTCTATCCAGCTATCCAACACGGATGTTTAAATCTAATCAAGGAGAAATCCGAG  
 GTGCCTTTAGGGCATGTTTATAAAATTCGGAAGAAAGTGAATCACAGCCCCGAAGAAGCACT  
 GAAGCTTCTTTTAGCCCTCTTTGAAAGTGAACCAGAGTGAAGGCCATTGTAGTTGCAAGCA  
 CAACCAACGAAGTGAAGAATTGGCCTGCTCTTGGAGAAAGTATTTTAGGGTGGTATGGATA  
 CACGGGAAGCTGGATGCTGCAGAAAAGGTGTCGACAAAAGGAGTTTGTACGGACGGTAA  
 CATGCGAGTTCTCATCGGAACGAAATTAGTGAAGGAAATTGACATTAAGCAATTGATGA  
 TGGTGATCATGCTTGATAATAGACTTAATATATTGAGCTCATTCAAGGCGTAGGGAGACTA  
 AGAGATGGGGGCTCTGTTATCTATTATCTAGAAAAACAGTTGGGCGGCAAGGAATCGTAA  
 GGGTGAATTACCACCAATTAAGGAAGGCTGTATAACCGAACAGGTACGCGAGTTCTATGGAC  
 TTGAATCAAAGAAAGGAAAAAAGGGCCAGCATGTTGGATGCTGTGGCTCCAGGACAGACCTG  
 TCTGCTGACACAGTGGAACTGATAGAAAGAAATGGACAGATTGGCTGAAAAACAGGCGACAGC  
 TTCCATGTGATCGTTGCGTTACCGTCTAACTTCCAGGAGAGCAATAGCAGTGACAGGTACA  
 GAAAGTATTGCAGCAGTGATGAGGACAGCAACACGTGCATTCATGGTAGTGCTAATGCCAGT

ACTAACGCCAGTACTAATGCGATTACCACTGCTAGTACCAACGTCAGGACTAATGCGACTAC  
 CAATGCTAGTACTAATGCGACTACCAATGCCAGTACCAATGCGACTACCAACTCCAGCACTA  
 ATGCTACTACCCTGCCAGCACCAACGTCAGGACTAGTGCTACTACCCTGCCAGCATCAAC  
 GTCAGGACTAGTGCTACTACCCTGAAAGTACCAACTCCAGCACTAATGCGACTACCCTGC  
 CAGCATCAACGTCAGGACTAGTGCTACTACCCTAAAAGTATCAACTCCAGCACTAATGCTA  
 CTATCACTGAAAGTACCAACTCCAACACTAATGCTACTACCCTGAAAGTACCAACTCCAAA  
 ACTAGTGCTACTACCCTGCTAGCACCAACTCCAACACTAGTGCTACTACCCTGAAAGTAC  
 CAACTCCAAAAGTACTAGTGCTACTACCCTGCTAGCACCAACTCCAACACTAGTGCTACTACCA  
 CCGAAAGTACCAACTCCAACACTAGTGCTACTACCCTGCTAGCACCAACTCCAGCACTAAT  
 GCTACTACCCTGAAAGTACCAACGCTAGTGCCAAGGAGGACCCAATAAAGATGGCAATGC  
 TGAGGATAATAGATTCCATCCAGTCACCGACATTAACAAAAGAGTCGTATAAGCGGAAAGGA  
 GTCAAATGGTTTTGCTAGAGAGAAAAGAACTGAAAGCACAATTTCCCAATACTTCCGAGAAT  
 ATGAATGTCTTACAGTTTCTTGGATTTCCGGCTGACGAAAATTAACATCTTTTCTCTATGG  
 TATTGACATATACTTCTGCCAGAGGGCGTATTCACACAATACGGATTATGCAAGGGCTGTC  
 AAAAGATGTTGAGCTCTGTGCTGTTGGGCTGGCCAGAAAGTATCGTATAGGAGGATGGCT  
 TGGGAAGCACTAGCTGTGGAGAGAATGCTGCGAAATGACGAGGAATACAAAGAATACTTGGGA  
 AGACATCGAGCCATATCATGGGGACCCTGTAGGATATTTGAAATATTTTAGCGTAAAAAGGA  
 GAGAGATCTACTCTCAGATACAGAGAAATATGCTTGGTACCTGGCCATTACTAGAAGAAGA  
 GAAACAATTAGTGTATTGGATTCGACAAGAGGCAAGCAAGGGAGCCAAGTTTTCCGCATGTC  
 TGGAAAGCAGATCAAAGAGTTGTATTATAAAGTATGGAGCAACTTGCGTGAATCGAAGACAG  
 AGGTGCTGCAGTACTTTTTGAACTGGGACGAAAAAAGTGCCAGGAAGAATGGGAGGCAAAA  
 GACGATACGGTCTTTGTGGAAGCGCTCGAGAAAGTTGGAGTTTTTTCAGCGTTTTCGTTCCAT  
 GACGAGCGCTGGACTGCAGGGTCCGCAGTACGTCAAGCTGCAGTTTAGCAGGCATCATCGAC  
 AGTTGAGGAGCAGATATGAATTAAGCCTAGGAATGCACTTGCAGATCAGATTGCGCTGGGA  
 GTTACCCCATCTAAAGTGCCGCATTGGACGGCATTCTCTCGATGCTGATAGGGCTGTTCTA  
 CAATAAAACATTTCCGGCAGAACTGGAGTATCTTTTGGAGCAGATTTCCGAGGTGTGGTTGT  
 TACCACATTGGCTTGATTTGGCAAACGTTGAAGTTCTCGCTGCAGATAACACGAAGGTACCA  
 CTGTACATGCTGATGGTAGCGTTTCACAAAAGAGCTGGATAGCGATGATGTTCCAGACGGTAG  
 ATTTGATATAATATTACTATGTAGAGATTTCGAGCAGAGAAGTTGGAGAGTGA

>YBL111C 1.64 Hot

ATGAAAGTTTTCCGATAGGCGTAAGTTTGAAAAAGCAAACCTTGACGAGTTTGAGTCCGGCTCT  
 AAATAACAAAAACGACTTGGTACATTGTCCCTCAATAACTTTATTTGAATCGATCCCCACGG  
 AAGTGGGTCATTCTACGAAGACGAAAAGTCTGGTCTAATCAAAGTGGTAAAATTCAGAACT  
 GGTGCAATGGATAGGAAAAGGTCTTTTGAAAAAATTGTCTTTCCGTCATGGTCCGGAAAAA  
 TGTACAAAAGTTCCCTGACGTTTGTGAAAGACGAACCAGATTTCCAGGGCGGACCAATCCCTT  
 CAAAGTATCTTATTCCCAAGAAAATCAACTTGATGGTCTACACGTTGTTTCAAGTGCATACT  
 TTGAAATTC AATAGAAAGGATTACGATACCCCTTTCTCTTTTTTACCTCAACAGAGGATACTA  
 TAATGAGTTGAGTTTCCGTGCTCCTGGAACGTTGTTACGAAATAGCGAGTGCCAGGCCGAACG  
 ACAGCTCTACGATGCGTACTTCACTGACTTTGTTTCTGGCACACCTATTGTAAGGAGTCTT  
 CAGAAAAGCACCATTAAGGAAATATGGATACAATTTGGCACCCCTACATGTTCTTGTACTACA  
 CGTAGATGAGCTATCGATTTTTTCTGCATACCAAGCAAGTTTACCTGGCGAAAAGAAAGTCG  
 ACACAGAGCGGCTGAAGCGTGATCTATGCCACGTAACCCACTGAGATAAAGTACTTTTCA  
 CAGATATGTAACGATATGATGAACAAAAAGGACCGATTGGGTGATGTTTAGCTACAGCGCA  
 ACGTATACGTCGACGATAACAAGAACGGTTCATCGGAGCCTCGACTAAAGACGCTTGACG  
 GACTCACTTCCGAGCGCTGGATTCAATGGTTAGGCCTTGAAAGCGACTACCATTGTTTCATTC  
 TCTAGTACTCGGAATGCGGAAGACGCTAGTGGCAGGTGAGGCGGCGAGTTCAGATCATGATCA  
 AAAAAATTC AAGAGTAACGCGAAAAAGGCCCGAGAGCCCAAGAGTACAAACGATATCTCG  
 TCGCAGGCCGAAACTCTTTGGCAGCTCCTTTGAATTCAGGGACTTGATCAGTTGCGCTTA  
 TGTATGAAATATACATGGCAGACACACCCCTCTGTGGCAGTACAGGCCCCACCGGGCTATGG  
 TAAGACGGAGTTATTTTCATCTCCCTTGATAGCACTGGCATCTAAGGGCGACGTGAAATATG  
 TGTCTTTCTGTTTGTACCGTACACAGTGTGCTTGTAAATTCATGATCAGGTTGGGCCGA  
 CGCGGTTGCTTGAATGTGGCCCTGTAAGAACTTTATTGAAGAAGGTTGCCATGGCGTTAC  
 TGATTTATACGTGGGGATCTACGATGATCTTGTAGCACTAATTTACAGACAGGATAGCTG  
 CGTGGGAGAATATGTTGAGTGCACCTTTAGGACCAACAACGTAATAATGGGTTACCTCATT  
 GTAGATGAGTTTCAAACTTTGAAACGGAGGCTACCGGCAGTCGCAATTTGGGGGCATAAC  
 TAACCTTGATTTGACGCTTTTGGAGAAAGCAATCTTTTTGAGCGGCACAGCCCCTGAGGCTG

TTGCTGATGCTGCGTTGCAGCGTATTGGGCTTACGGGACTGGCCAAGAAGTCGATGGACATC  
AACGAGCTCAAACGGTTCGGAAGATCTCAGCAGAGGTCTATCCAGCTATCCAACACGGATGTT  
TAATCTAATCAAGGAGAAATCCGAGGTGCCCTTAGGGCATGTTTCATAAAAATTTGGAAGAAAG  
TGGAATCACAGCCCGAAGAAGCACTGAAGCTTCTTTTAGCCCTCTTTGAAATTGAACCAGAG  
TCGAAGGCCATTGTAGTTGCAAGCACAACCAACGAAGTGGAAGAATTGGCCTGCTCTTGGAG  
AAAGTATTTTAGGGTGGTATGGATACACGGGAAGCTTGGGTGCTGCAGAAAAGGTGTCTCGC  
ACAAAGGAGTTTGTCACTGA

>YJR148W 1.56 Hot

ATGACCTTGGCACCCCTAGACGCCTCCAAAGTTAAGATAACTACCACACAACATGCATCTAA  
GCCAAAACCGAACAGTGAGTTAGTGTGGCAAGAGCTTCACGGACCACATGTTAACTGCGG  
AATGGACAGCTGAAAAAGGGTGGGGTACCCAGAGATTAACCTTATCAAAATCTGTCTTTA  
GACCCTTCCGCGGTGGTTTTCCATTATGCTTTTGGAGCTATTCGAAGGGATGAAGGCTTACAG  
AACGGTGGACAACAAAATTACAATGTTTCGTCCAGATATGAATATGAAGCGCATGAATAAGT  
CTGCTCAGAGAATCTGTTTGCACCGTTCGACCCAGAAGAGTTGATTACCCTAATTGGGAAA  
CTGATCCAGCAAGATAAGTGTCTTAGTTCCCTGAAGGAAAAGTTACTCTTTATATATCAGGCC  
TACATTAATCGGCACTACGGCCGGTTTTAGGGGTTTTCCACGCCTGATAGAGCCTTGCTATATG  
TCATTTGCTGCCCTGTGGGTCTTATTACAAAACCTGGATTTAAGGCGGTGAGACTGGAAGCC  
ACTGATTATGCCACAAGAGCTTGGCCAGGAGGCTGTGGTGACAAGAAACTAGGTGCAAACTA  
CGCCCCCTGCGTCTGCCACAATTGCAAGCTGCTTCAAGGGGTTACCAACAAAATTTATGGC  
TATTTGGTCCAAATAACAACATTACTGAAGTCGGCACCATGAATGCTTTTTTTCGTGTTTAAA  
GATAGTAAAACGGGCAAGAAGGAAGTACTGCTCCACTAGACGGTACCATTTTGGAAAGG  
TGTTACTAGGGATTCCATTTTAAATCTTGTCTAAAGAAAGACTCGAACCAAGTGAATGGACCA  
TTAGTGAACGCTACTTCACTATAGGCCAAGTTACTGAGAGATCCAAGAACGGTGAACACTT  
GAAGCCTTTGGTCTGTTACTGCTGCGATTGTTTCTCCCATTAAGGAAAATCGGCTGGAAAGG  
CGAACAAATTAATATTTCCGTTGTTGCCCGGCGAACAAACCGGTCCATTGGCCAAAGAAGTTG  
CACAAATGGATTAATGGAATCCAATATGGCGAGACTGAGCATGGCAATTGGTCAAGGGTGT  
ACTGATTTGAACTGA

>YBL006C 1.64 Hot

ATGAGTGGAAAGTAATATGGGATACTATGACGTAICTCGCAGGGCTTTCAGCGCTGGAAAAGTC  
ATCCCAGGTAGTGTTCAGTGCAGCTGAGCTTCAACAGCTTACGCAACAATCTCATGCTACCG  
ACAAGGGCATAGAGGGCAGTGAGAATAGTAAAGCGAAGGTATCCAAGCCCCAAAAGAGTAGCT  
GTACATGGTTACCTAGGCGGTAAAGTGTGCTCGCCGATGCGGCACAGGTGGAGTATGAAGT  
AGGCCATTCACTGCTGGGCAGTTATGTGCCACGCCAGCAGTTGGAAGCCCTGTCAAGTGTG  
ACTTTTCGCACCAATTTCCACCGCACATTAGAATGCAAAGCTGCTCTAGAGACACACGATGTT  
TTTCTTGGCGGCGCAGGACAATTGTCTCTACCCTTCCAATCACACATAGAGAGCCCCAGGAA  
TAGCGAGGCTAAAAGGAAAAGAAAAGTGATAATATGCAAACGGTGTCAATCACGATTTATAG  
GTTCCCATAGGCGGTCTCAACTTAGAGAACATGCCTGCGTAGATTAA

>YCR049C 2.04 Hot

ATGGCGCTGTCCAGGAGCGTGGGGCGAGGATCAAACCTCACGTCCCCAAAAAACGACACATA  
CTTGCTAGCATCCTTTTCGGTGGAACTTCGACCGAGACTTGCTCTTCAGGTGTGAAAGGTACT  
TTTGCATGTGGGCGTCCACAGGGTACTCCTCCTCCTGCTCCTGCTTCCCTGCCACACGTTCC  
GCCTCAGTCGACTCCACTCCTTCAGTCGACTCCACTGGCTCCACCAGCGACGTGGTAGACGA  
CCGTGGCGAAACCTCCATGGACTCCTGTGGCAGGATCACGTTATCGTACGTGACCGAATGCC  
GTTTGTGGCTTCTGCGGAATTGAGTCTGCGGATCTTAAGAAACTCTTCGTCTTGCAACAAA  
TCCTTAGTCTCCGTCAATCTTGTCAATCTGTTTTGGCGCTCTTGCTGCAAGCCGTGCTGAACA  
ACCACCTGCGTGA

>YAL040C 1.54 Hot

ATGGCCATATTGAAGGATACCATAATTAGATACGCTAATGCAAGGTATGCTACCGCTAGTGG  
CACTTCCACCGCCACTGCCGCTCTGTGAGCGCTGCCTCATGTCCTAATTTGCCCTTGCTCT  
TGCAAAAGAGGCGGGCCATTGCTAGTGCAAAGTCTAAAAACCTAATCTCGTTAAAAGAGAA  
TTGCAAGCACATCACTCAGCGATCAGCGAATAACAATAATGATCAATTGGACCACTATTTCCG  
TCTTTCCACACAGAAAGGCCGCTGTACAACCTGACTAACTTCAACTCTCAGCCACAAGTTA  
ATCCGAAGATGCGTTTTCTTGATCTTTGACTTCATCATGTACTGTACACAAGACTCAATCTA

TCGACCTCGACTTTGTTCCCTTACTTTCACTATCTTGGACAAGTATTCCTCGCGGTTTCATTAT  
 CAAGAGTTACAACCTACCAGCTCTTGTCCCTTGACCGCGCTTGGATTTTCGTCCAAATTTTGGG  
 ACTCCAAGAATAGAATGGCCACTTTGAAAGTCTTGCAAACTTGTGTTGCAATCAATATTCT  
 ATAAAGCAATTCACGACTATGGAAATGCATCTTTTCAAATCACTCGATTGGTCCATCTGTCA  
 GTCGGCAACATTCGACTCCTACATCGACATCTTCTTGTTCGAATCTACGTCCCCGTTATCGC  
 CTGGCGTTGTCTTTCTGCCCCTTTGGAAAGCTTTCATTCAACAGAACTGGCCTTATTAAT  
 AACGCTGCTGGTACTGCTATTAATAAATCGTCCTCTTCTCAAGGCCCTCTTTGAACATCAA  
 CGAGATCAAATGGGTGCCATTATGTTGTGCGAGTTAGCTTCCTTCAATCTCGAATTATCAT  
 TTAATATGATCGTTCACTAATTGCGCTGGGTGCAATTAACCTCATCAAATTTATCTTTGAAC  
 TACTATAATTCAAACCTTTGGGAAAATATCAATCTGGCTTTGGAGGAAACTGCCAAGACCT  
 AGATATTAATTTGTCAGAAATCTCTAATACTTTATTGGATATAGCAATGGACCAAATTTCTT  
 TCCCCTCCAGTTTCAAATCAAATATTTGAATAGCAATAAGACATCTTTAGCAAATCTCTC  
 TTAGACGCATTACAAAATTTGTTTCAATTTGAACTGGAAGAATTCTACCGTTCACAAGA  
 ATTTGAAACCATGTACAATACTATCTTTGCTCAGTCCTTTGACAGCGATTCAATGACTTGTG  
 TTTACTCAAATGCTACTACTCCAAAGAGCGCTACGGTTTCATCTGCGGCCACAGACTATTTT  
 TCGGATCACACTCATTTAAGAAGGTTGACCAAAGATAGCATTTCTCCACCATTTGCCCTCAC  
 TCCAACCTCATCTTCATCTCTCCATCTCCATTCAAATTTCCCCTTACAAGACTTCAAGTTCAA  
 TGACGACCCCAGACTCTGCATCACACCATTACATTACAGGTTTCGTTCTCTTCTACCCAAAAT  
 TCTTTTAAAAGGTCACTGAGCATCCCACAAAATTTCAAGCATCTTTTGGCCAAGCCCCTAAC  
 TCCCACCACCCCATCTCTAATGTCAAATAGAAAATTATTACAAAATTTATCTGTGCGTTCAA  
 AAAGATTATTTCTGTTAGACCCATGGCCACTGCTCACCCATGCTCTGCCCCACCCAACTG  
 AAAAAGAGATCAAATTCCTCTGTGGATTGTGATTTAATGATAGTAGCAACCTCAAGAAAAC  
 TCGCTGA

>YLR074C 1.75 Hot

ATGGGTAGATATTCGGTGAAGAGATACAAGACTAAAAGAAGAACACGAGACTTGGACCTGAT  
 CTATAACGATTTGTCCACCAAGGAATCAGTACAGAAGCTTCTGAACCAGCCATTGGATGAAA  
 CCAAACCGGGCTTGGTACGACTATTGCATACACTGTGCCAAATACATGGAGACTGCTATA  
 GCGTTAAAACGCATTTAAAGGGCAAAGTGCACAAAAGAAGAGTCAAGGAGTTGAGGGGTGT  
 CCCTTACACACAAGAAGTCTCTGATGCTGCTGCGGGCTACAATTTGAACAAGTTCTTGAACC  
 GTGTACAGGAGATCACGCAATCGGTGGGTCCGGAGAAGGAAAGTAATGAGGCCCTTGCTGAAG  
 GAGCATTTGGACAGTACCTTGGCAAACGTCAAACAACAGAACCTACTCTACCGTGGGCGGC  
 TGCTGATGCCGAGGCGAATACCGCTGCCGTAACAGAGGCAGAGTCTACTGCCTCAGCCAGTA  
 CTTAA

>YNL290W 1.61 Hot

ATGTCGACAAGTACAGAGAAGAGGAGCAAAGAAAACCTTCCATGGGTTGAAAAATACAGACC  
 CGAAACGTTGGACGAAGTGTACGGACAAAATGAGGTGATCACCACAGTTCGTAAATTTGTAG  
 ATGAAGGTAAATTGCCACATCTTCTATTCTATGGGCCTCCAGGTACCGGTAAAACCTTCTACA  
 ATTGTTGCTTTGGCACGTGAGATATATGGTAAGAATTACTCGAACATGGTTTTTGGAGCTGAA  
 TGCATCCGATGACAGAGGTATTGATGTGGTGAAGGAATCAAATTAAGACTTTGCCTCTACAA  
 GACAAATCTTCTCTAAAGGGTTCAAGTTAATTATACTGGATGAAGCAGATGCCATGACCAAT  
 GCCGCACAAAATGCGTTGAGAAGAGTTATAGAACGGTACACCAAGAATACGCGGTTCTGTGT  
 ATTTGGCCAATTATGCGCATAAACTTACACCTGCGTTATTGAGTAGGTGCACGAGATTCAGAT  
 TTCAGCCCTTGCCCCAAGAGGCCATTGAGCGTCCGATAGCCAACGTCTTGGTGCATGAGAAG  
 CTGAAGTTGTCTCCTAATGCGGAGAAGGCCCTTAATAGAACTTTCTAATGGGGATATGAGACG  
 TGTGTTAAACGTTTTGCAGTCTTGCAAAGCTACTTTAGACAATCCCACGAGGATGAGATCA  
 GTGACGACGTTATCTATGAATGCTGTGGGGCACCCAGACCAAGTGACTTAAAGGCAGTATTG  
 AAGTCGATACTGGAGGACGATTGGGGTACCGCCACTACACACTTAATAAGGTACGCAGTGC  
 CAAGGTCTCGCGTTGATCGACCTAATCGAGGGCATAAGTGAAGATACTGGAAGACTACGAAC  
 TTCAAATGAGGAAACAAGAGTGCATTTGCTTACCAAATGGCCGATATAGAGTACTCGATA  
 TCCAAGGTTGGCAACGACCAGATTCAGGGCAGCGCGGTTCATTGGCGCCATCAAGGCCAGCTT  
 CGAGAACGAACTGTTAAAGCCAACGTATAA

>YLR202C 1.65 Hot



ATGCCCAACTTTCATCTTATAAATATATGCGTTTTCTACCGTTATTATAATTTTTTTCTTAT  
 TTGCCATGACATATCCTTTCTTTTCGGACTATATTAGGCGGAAGAAAAATAGCAATAACAA  
 TAGTAAGAAACAATAATACGGGGTTTTTTTTTTTTTTGGGCCACATAAGGTACTTCACCCCA  
 ATTTGGAAAGAGATAACAGAGTCTTTACCACATTATAAATCATGCTTTGTGCGCAATACTGCC  
 AGAACGGGCTGTAAATTCCTTCGTTTATATCATTCGAACCCATCGAACATGTTAAACCAAT  
 TCATATTAACCTTTAA

>YDR234W 1.82 Hot

ATGCTACGATCAACCACATTTACTCGTTCGTTCCACAGTTCCTAGGGCCTGGTTGAAAGGTCA  
 GAACCTAACTGAAAAAATTGTTTCAGTCGTATGCGGTCAACCTTCCCGAGGGTAAAGTTGTGC  
 ATTCTGGTGACTATGTATCGATCAAGCCGGCACACTGTATGTCCCACGATAATTCGTGGCCT  
 GTAGCTTTGAAATTCATGGGGCTTGGCGCTACCAAGATCAAGAATCCTTCACAGATTGTGAC  
 CACTCTGGACCACGATATTCAGAACAATCAGAGAAAAATTTGACCAAGTACAAGAACATCG  
 AAAATTTTGCTAAGAAACACCATATAGACCACTACCCTGCCGGTAGAGGTATTGGTCATCAA  
 ATTTATGATTGAGGAGGGCTATGCTTTCCCTTGAACATGACTGTGCGCATCTGACTCGCATT  
 AAACACCTACGGTGGTCTGGGGTCTGGGCACTCCAATAGTGAGAACAGACGCTGCAGCCA  
 TATGGGCCACGGGACAGACGTGGTGGCAGATCCCACCAGTGGCTCAGGTTGAGTTGAAAGGT  
 CAATTGCCTCAGGGTGTTCGGGAAAAGATATCATTGTGCGCATTATGTGGGCTTTTCAACAA  
 TGATCAAGTTCTAAATCACGCCATTGAATTCACGGGTGACTCTTTGAATGCATTGCCATATCG  
 ATCACAGACTCACTATTGCTAACATGACCACCGAGTGGGGGGCTCTTTCTGGTTTGTTCCTCC  
 GTGGACAAAACCTTTGATCGACTGGTATAAAAACCGTTTGCAAAAGCTGGGCACCAATAATCA  
 TCCAAGGATTAATCCAAAGACTATCCGCGCACTAGAAGAAAAGGCGAAGATTCCGAAAAGCAG  
 ACAAGGATGCACATTATGCCAAGAACTGATCATCGATCTAGCCACGCTAACTCACTACGTC  
 TCAGTCCAAATAGTGTTAAGGTCTCCAACACCGTGCAAGATCTATCTCAACAAGACATCAA  
 GATAAATAAAGCTTATCTAGTGTATGTACAACTCCCGTCTATCTGATTGCAATCTGCAG  
 CGGATGTGGTTTGTCTACTGGAGACTTAAACAAAGTCAACAAGGTGGCTCCAGGTGTGGAG  
 TTCTATGTGCTGCTGCCTCTTCAGAAATTGAGGCTGATGCCCGTAAATCAGGCGCTTGGGA  
 AAAGCTGCTAAAGGCTGGCTGTATCCCACTGCCTTCTGGTTGTGGTCCATGCATCGGTCTAG  
 GTGCGGGATTACTGGAACCAGGTGAAGTTGGTATCAGTGCCACAAACAGAACTTCAAAGGT  
 AGAATGGGTTCCAAGGATGCATTGGCTTACTTAGCTTCCCTGCTGTAGTCGCCGCTTCTGC  
 CGTGTGGGTAAGATTAGTTCCTGCTGAGGTATTGTCCACAAGCGAAATTCATTACAGCG  
 GCGTTAAGACTGAGATAATTGAGAATCCCGTGGTTGAAGAGGAAGTTAACGCTCAAACAGAG  
 GCTCCAAAACAATCCGTTGAGATATTAGAAGTTTCCAAGAGAGTTTTCTGGTGAATTAGT  
 TTTATGTGATGCCGATAACATCAATACCGATGGTATATATCCTGGTAAGTACACTTATCAGG  
 ATGATGTGCCTAAAGAAAAGATGGCGCAAGTTTGTATGGAAAATTATGATGCCGAGTTCAGA  
 ACCAAGTTTCATCCAGGTGATATAGTGGTCAGTGGGTTCAATTTCCGTACCGGTTCTCTCCAG  
 GGAACAAGCGGCCACCGCTTATTGGCTAAAGGTATCAACTTAGTTGTTTTCAGGATCTTTTG  
 GTAATATTTTTTCAAGAACTCCATTAACAATGCTCTTCTGACCTTGGAAATCCCAGCATT  
 ATCAAAAATTACGTGAGAAATATCAAGGTGCTCCAAAAGAACTTACAAGAAGAAGTGGTTG  
 GTTTTGAATGGGATGTAGCTGATGCTAAAGTGGTTCGTTACCGAAGGTTCTTTGGACGGCC  
 CTGTGATCTTGGAGCAAAAAGTGGGTGAGCTAGGTAAGAACCACAAGAAATTATTGTAAAA  
 GGAGGCTTGAAGGTTGGGTCAAATCCCAACTATAA

>YIL023C 1.69 Hot

ATGAAGGCGTCGCACATTTGCTCTTATTTGCTAAGCATTGCACCCCTAGTGGTGTCCCATGG  
 AGTACATCATAATCGAGATCATGGCCACGAGGCAAACCATGAGTCCAAGCAAAGTTTCTTGA  
 TTTTGAAGCAAGAATCCATTTTTACTCTCTAGTTTGTCTTCTGCAGAACCACCTCTTTGTC  
 CTGGGACCCCGTTACAATGCGATTGTGGCTATCCTAATCATACAACCTTATGCCGTGTCTTTT  
 CGTACTGTTTTGTTCCCTGGACTGCGCAAGAACGATCGTGCCAGCTTGACACTGTCCTTACTAG  
 TTTCTTTTCTCTAGGAACACTCCTGGGTGATATTTTATTACACGTGATACCTGAAAGTCTC  
 AGCGGCGTAACTGATGTCACAATGGTTGGAGGAGCCATATTTCTGGGGTTATAAGCTTCTT  
 GACTCTGGATAAAACGATGCGTATTCTGTGAGGACGTTCCAACGATGACGGCAGCATAACATT  
 CTCATTCTCATAGTCATACTCCACAACAACTGCAGAGAAGAAAGCGGGCTTTAACATGTCT  
 GCGTATCTGAATGTCATATCCGGCATTGCTCATCACATCACGGATGGCATAGCGCTGGCTAC  
 GTCATTCTATAGTTCCACACAAGTTGGCATAATGACCAGCATAGCTGTCACTTTCCATGAGA  
 TCCCTCATGAGCTAGGTGACTTCGCCATTCTGCTTTCCAGTGGGTTTACGTTCCACAAGCG  
 ATAAGAGCCCAAGCGGTGACAGCTTTCGGCGCCGTCGTTGGAACGTCCATTGGCTGCTGGAT

GAACGAAATCGGGAACAACAGCCATAAAGCAACGTCTTCATCCGCGAACGCATCTGAACTTA  
 TGCTGCCGTTACGGCGGGCGGCCTCATATACATAGCCACTACTAGCGTTGTACCGCAGATC  
 TTACATAGCTCCGCACCCGATAGCAAGCTTCGAGAGTTTAAGAAGTGGGCCTTGCAGCTAGT  
 CTTCATTTTTGTAGGATTTGCCGTTATGGCGCTCATGGATGAGCATTGA

>YLR279W 1.75 Hot

ATGCGATTTCAGGTCCTCAACGTGCAGTGTGCAGGAGCAGGAACTATTCAATGTATTGTTGTTT  
 CAGGGTTTTTGTTCGCAACCCACGTCTTGACCGACGGTACCCGCAGGTGAAAATTTTAGCAA  
 AGTTACACTTTTTTTTTTCATTTTTTTTTTTCTTTTTCTCTCCATCTAATTTACCTGCGGTT  
 ACCGGCGGAATAACTCGCGCACCATTTCTCTGTCTCGGGCTCGCGTTCCTTTTTTCGACT  
 CGAGCGGCCTCTTCACGCTGCTCGTACTTCGCGACGCTGCGCCGGCGCTGCGAGCGTTTCTG  
 TTGACGGTGCCACTGTAGAAGCGCCTCCTCTCTGGACGGCATCGTGTCTGACGCGCCGCAA  
 GTTCGCGCGGAGCTTAA

>YJL119C 1.61 Hot

ATGAACCACTTGACAACGGTCTTGGCCGCACGTAACAACTGTGTGGTGCAGAGAAGCAACGAA  
 TCTGTATACAGTTGATACAGAACGTTCGGATCAACAAAATGGGGCGTGATGAAGAAAAAAGT  
 GCGGATCCCGTGGAGGACATTGGTGCATGGATGATTCAATCATAAATTTACGACATTTAAC  
 CAAAGTTGCACTCTGATGGGCTCAACGACTGCTACTCGTGCCAATAATGAACTGAAAAGCA  
 TGAAGCCATCACTGTTTTTTTTCGTGGTCTTTCTATATATAAACAAGCCTCTGTAAAGTTTT  
 TTTTTTTCGCATAA

>YDR048C 1.96 Hot

ATGTCCTTCTACTTCAACTTCTCGCAGTGTGGAGTCAAAGCTCATCAATTTCAATGAATTC  
 AGAAGTTGCTCAGACAAATCAAAAATATAAAGATCATTCTTTTTTAGTGAGCCAGTCATTTT  
 ACTCGCCTTTTGTGAATTCATGCTATTGGAAGCTTGTCAACAGGCGTGCAGATCTTTTGAAA  
 ATCCTTTTTTCTTCGAAGGAAAGGTGATATGCATTCTCATTTATTTTCATATACCTTCATCTT  
 TTATTTTCTTCTATTTAAGATTTTGTCACTACATCCATTCAGAGAACCCTGCAAAAATAAATA  
 TCTGA

>YEL038W 1.58 Hot

ATGGGAGACAATTACTCGACTTACTTGCTTGATATTGAAGGGACAGTGTGCCCGATCTCGTT  
 CGTGAAGGAGACTTTATTCCCTTATTTTACGAATAAAGTGCCGCAATTGGTTCAACAGGATA  
 CAAGGGACTCCCCGGTTTCCAACATTTCTGTTCGAGTTTACATCGACAATAAGGAGCAGTTG  
 CAGGCGCATATTTTGGAGTTGGTGGCCAAGGATGTGAAGGATCCAATCTTGAAACAGTTGCA  
 AGGCTACGTCTGGGCTCACGGATACGAATCTGGGCAGATTAAGGCGCCGTTTTATGCAGATG  
 CTATTGACTTTATCAAGAGGAAGAAGCGTGTGTTTTATCTACTCTAGTGGATCTGTAAAGGCA  
 CAGAAATTGCTGTTTCGGGTATGTTTCAGGATCCCAACGCGCCTGCGCATGATTCGTTGGATTT  
 GAATCTTTATATAGATGGTTATTTTCGACATCAACACTTCTGAAAGAAAACCGAAACACAGT  
 CTTACGCCAACATCTTTCGGGATATCGGTGCGAAGGCTAGCGAGGTACTGTTCTTGAGCGAT  
 AATCCATTGGAATTGGACGCAGCGCCGGCGTTGGAATAGCTACTGGGTAGCTTCCCGACC  
 TGGTAATGCACCTGTCCCCGATGGGCAAAAAGTACCAGGTATACAAGAATTTTGAAACTCTTT  
 AA

>YPR151C 1.59 Hot

ATGATTTTATTAAAGAGGACAAAAATTAGGGGCGTCAGCGTCTCTTTTGTAAAGCTTGCAAAG  
 AAGGACTCACAGCAGACTGGTGAACCCCATAGGCAGCAACATCAACAAATTACCAAGCAA  
 GGAGTTCAAAGATTTTAAAGAATGCGCATTTCTATGACTTTAGATCGCTGCCCAAAGTACCT  
 ACTACACAGTATTTGGAAGCTAGGGAGCTCACCCGCGATATTTCTGTATAGCGGATACAGGCC  
 AGTAATGTACCCAGTGAAGGAAAACCCGCTATTCAGAGATAAGAAGAGAAAGTCTTTGCAA  
 CGTTATTAACAATGAACGAGAAAACAAACGCAGAGGCGAAGACGATCGATGAGAAAAAGCAC  
 AAGAACATATTGTTTGGTGAACGTGGCACTGGTGGTATAATGTCAGGTGGCGTGAACGGTAC  
 ATGGAAGTACAATCCCACCGTACCCAATGAGCTGTTGCCATTCATTTGGTGGTCTACGTCCA  
 GTATGGGTATGGAATATTTTCTGAAATGGAAAAACGTGCCCCCATATATGATGAGAAAGTTG  
 AAGCCGTTTGAACAAGGCACTGCAAATGCGGTTGACACACAAAAGCAAAAAAAGATGAAATA  
 A

>YOR327C 1.56 Hot

ATGTCGTCATCAGTGCCATACGATCCATATGTGCCTCCAGAGGAGAGTAACTCAGGCGCAAA  
 CCCAAATTCCCAAAACAAGACTGCTGCTTTGAGACAAGAGATTGATGACACGGTGGGAATAA  
 TGAGAGATAATATCAACAAGGTTGCTGAACGTGGTAAAAGGCTAACATCCATTGAGGACAAA  
 GCTGATAAAGTTGGCTATCTCCGCACAAGGATTCAGAGAGGGCGCCAACAGGGTCAGAAAAGCA  
 AATGTGGTGGAAAGATCTAAAAATGAGAATGTGTTTATTCTTAGTTGTTATTATTTTACTAG  
 TGGTAATTATCGTTCCTATCGTCGTCCATTCAGCTAA

>YER035W 2.04 Hot

ATGGGTTCCGAGACAAAACATTCCTGCAAAAAGTCAAGATTGTCACAAGGGAAAGTCCTCCTTC  
 CGCAAGGAGCACATGCGCCCCACTAAAACCTCAAATATTAGTTCCACCGACGCAGAGTTTGC  
 CCAATGGCAAGAAACCAAACCTTCGGTAAAGTCTACAAAACAGCGGCGAGAACCCTAGGGAACGC  
 ACCTCGAAGACGGGACACGAGGACGATAAGGCAACGATGGTCACTGTAAACATAGATGCCTT  
 CCTACATGATAAGGCCCTAAAAAAAATCGTGCAAAATACAAGAAGAAGAAAACGAGACAGT  
 ACCAGGATAGGGCGGCGGCGTTCGATCGATTGAAACCGCACGTAGCTGGTCATACGGCCTTT  
 GCCGGTGTTCGTTTACAACAGATATCCACATGAGGCAGCGCTACCCAAACCTAGTTTTGT  
 TTGA

>YNL322C 1.89 Hot

ATGATGCGTGCACGCTATTACATTCATTCGCTACGCTGCTACTTTCTTTGTGCTTGTGGTC  
 AGCTGCGGTTCATGGCAGCTGTGACAACCTCAGGTTACAGTGGTAACAAATGTCGCAGGGGCC  
 TGGTTACGGAGACCACAATATGGGACCCTGCCACCGCTGCTGCTGCTACAACCTACCGCT  
 CAAACAGGTTTCTTCACTACGGTATTCACTACCACTAACGATGTCGGAACCACCGTCACTCT  
 TACTCAGACAGTCAACAGAGCCACTATGCTACCAACCACGACGACTTCTACCTCATCTACTG  
 GTAAGACAACCACCACTGTTCCCTACCGCAACTTCATCGTTGTCTTCGGGACTGTATTTATCT  
 ACAGTTACCACGACAAACGATTTGGGTACCACAGTTACATTGACTCAAACGTTTACACATTC  
 TAGCACCAGTGCTACTTCATCCGCCTCCTCGTCTGTGTCCCTCGTCTGTATCTTCGTCTGGTT  
 CATCCTCCAGTGTAAGACGACCACATCGACAGGGAGCGCAGTAGCTGAAACAGGCACCAGG  
 CCAGACCCCTCCACAGACTTCACAGAACCTCCTGTGTCTGCTGTCACTAGTCTATCTATTGA  
 CTCATACATTACCATCACTGAAGGTACAACCTCCACTTACACAACCACACGTGCGCCAACGT  
 CCATGTGGGTCACTGTTGTTAGACAGGGCAACACTATCACTGTGCAAACTACTTTTGTCCAG  
 CGTTTCTCCTCCAGTACGTAACAGTCGCTTCTCCCTCCGTGGGGTCTATTGGGATGGGTAC  
 TTTAACCAGTACTGTAGGCGTTATTAATCTGCAATAAAGAAAACAGTTTCGCATAATGAGG  
 CCCAGCATCTAGGTATGAGTTCGTTTACTTCAATTTTGGGTGGGCTATTAACGGTTTTAATT  
 TGGTTCTTATAA

>YLR231C 2.05 Hot

ATGGAGAAAGCTTTGGAATTAGACGGAGAATATCCGGAATCTCTGAGGGATGAATTCACAT  
 CCTACATTTAAATCCATGGGACTATCGTCCGACGATAAGCCTGTGACGTACTTATGCGGGA  
 ATCTTTTAGGTTTGATGCCGAAGTCAACTAGGAATTCAAATTAATGCTGAGCTAGATGCGTGG  
 AGCGATTGTGCTGTGGAATCGCATTTCAAACATCCTGAAGAAGCCAGAGGAAAGGTGCCCTTG  
 GGTGAGCATTGACTTACCTATCTTCCACTACTAGCCCCATCGTGGGTGCTCAAGAAAATG  
 AAGTTGCAGTAATGAATAGTCTCACTGCAAAATTTGAATTCATTGTTAATTACGTTTTATAAA  
 CCTACTGAGAAAAGATTCAAGATCCTTTTTGAAAAGGGCTCCTTTCCATCAGACTATTATGC  
 TTTCTACAACCAGTGCAAAATTCATGGAATTCGGAACCTGAGAATGTTTTTATTTCAGATCG  
 AGCCACGCGAGGGAGAGACTTATATCAGAACTCAAGATATCCTGGATAACCATAGAGGTAAT  
 CAAGATGAATTGGCGCTGGTCTGTTTGTGAGGTGTTTACAGTATTACACGGGGCAATATTTTCA  
 TATTGGCCGAATCACCTCATTTGCCACCAATTTCCCGACATATTGGTTGGATGGGATTTAG  
 CACACGCTGTAGGGAACGTCCCATTTGCAACTTCATGATTGGGGTGTGACTTTGCCTGTTGG  
 TGTCTTACAAGTACTTGAATGCCGGGCTGGTGGAAATGGTGGCTTATTTGTCCACTCGAA  
 GCATACTAAACCAGACCCTGCTAAGGAAAGTTTGCCAAGATTAGCTGGTTGGTGGGGCAATG  
 ATCCTGCTAAGCGATTTCAAATGCTGGAAGTATTCGAGCCGATTCAGGAGCATTGGGATTC  
 AGGCAATCTAATCCAAGCGTTATTGACACAGTGGCATTGAGAAGTTCATTGGAATTTATTTGC  
 GAAGTTTAAATGGTATTAATGAAGTTCGTAAGATCGTTGTTGCTGACGAACATATGACGG  
 AACTGTTGGAAGCCTCCAAGTATTACAAACACCCTTTAAGGATCGAGAAATACCATGTTTT  
 TTTACAATATTAATCCAACAAGCACAGATGAAGAACATGGCGCCAATTTGTCATTTACTT  
 CGATTCTGACACTGGAAAAGAGGATATTATGCCCAAAGTTTTCCAATATTTGCATGACCATG

GTGTCATTGGCGATGCAAGAAGACCAAACGTAATTAGATTGGCTCCTGCTCCCTTATATAAT  
ACATTTTCAGATGTATACATTGCGGTGAATGCACTAAATGAGGCGATGGATAAGTTGTAG

>YGR180C 1.52 Hot

ATGGAAGCACATAACCAATTTTTGAAGACTTTCCAAAAAGAACGTCATGATATGAAAGAAGC  
TGAAAAGGATGAAATCCTTTTGTATGGAAAACAGCCGTAGATTCGTGATGTTCCCTATCAAAT  
ACCACGAAATCTGGGCTGCTTACAAGAAGGTTGAAGCCTCTTTCTGGACTGCGGAAGAAATC  
GAATTGGCTAAGGACACTGAAGATTTCCAAAAATTGACTGATGACCAGAAGACCTACATCGG  
TAACTTGTTAGCCTTGTCATTTCTTCTGACAACCTTGTCACAAGTACTTGATCGAAAACCT  
TTTCTGCCAATGCAAAACCCTGAAGGTAAGAGTTTCTACGGGTTCCAGATTATGATGGAA  
AACATCTACTCTGAAGTTTACTCCATGATGGTTGATGCCTTCTTCAAGGACCCTAAGAACAT  
CCCTCTATTCAAGGAAATTGCCAATTTGCCTGAAGTCAAGCATAAGGCTGCTTTCATCGAGA  
GATGGATTTCCAACGATGACAGCTTGTATGCTGAAAGACTAGTAGCATTGCTGCAAAGGAA  
GGTATTTTCCAAGCTGGTAACTATGCTTCTATGTTCTGGTTGACTGACAAAAAGATTATGCC  
AGGTTTAGCAATGGCCAACAGAAACATCTGTAGAGACAGAGGTGCCTACACTGACTTTTCAT  
GCTTGCTATTTGCCAATTTGAGAACCAAGCCAAACCCCAAGATCATTGAAAAAATCATTACC  
GAAGCCGTGGAAATTGAAAAGGAATACTACTCAAACCTTTGCCAGTAGAAAAATTTGGTAT  
GGATTTGAAGAGCATTACACCTACATAGAATTTGTGCTGACGGTCTATTACAAGGTTTCG  
GTAACGAAAAATACTACAACGCCGTCAACCCATTGCAATTCATGGAGGATGTCGCTACCGCT  
GGTAAGACCACCTTCTTTGAAAAGAAGGTTTCCGACTACCAAAGGCCAGTGACATGTCTAA  
GTCCGCTACCCCATCCAAGGAAATTAACCTTTGATGATGACTTCTAA

>YNL104C 1.87 Hot

ATGGTTAAAGAGAGTATTATTGCTCTTGCTGAGCATGCGGCCTCCAGAGCCTCAAGAGTTAT  
TCCCTCAGTGAAGCTAGCCTATAAAAATATGCTTAAGGACCCTTCCCTCCAAGTACAAGCCAT  
TTAACGCTCCAAAGCTATCTAATAGAAAGTGGCCGGATAACCGGATCACGAGGGCTCCTCGT  
TGGTTATCAACAGATTTGAGAGATGGTAAACCAATCTCTGCCGGATCCCATGTCAGTGGAAACA  
AAAGAAAGAATACTTTTACAAGCTGGTCAATATTGGGTTCAAAGAAATCGAGGTTTCCCTTCC  
CCTCTGCATCTCAAACAGATTTGACTTCACTAGATATGCTGTAGAAAACGCCCCAGACGAT  
GTTAGTATTCAATGTCTTGTCCAATCTAGAGAACACTTGATTAAGAGAACGGTGGAAAGCATT  
AACAGGTGCTAAAAAGGCTACTATACATACTTACTTGGCAACAAGTGATATGTTCCGTGAAA  
TTGTTTTTAATATGTCTAGAGAGGAAGCTATTTCCAAGGCAGTAGAGGCCACCAAACCTAGTT  
AGGAAACTAATAAGGATGACCCCTTCCAACAAGCCACTCGTTGGTCCATGAGTTTTCCCC  
CGAATGTTTTCAGTGATACTCCAGGTGAATTTGCTGTAGAAATTTGCGAAGCTGTTAAGAAGG  
CTTGGGAACCTACCGAGGAAAATCCAATCATTTTCAACTTACCTGCTACCGTAGAAGTTGCC  
TCTCCAAATGTTTATGCTGATCAGATTGAATACTTCGCTACCCATATTACTGAGCGTGAGAA  
GGTTTGCATCTCTACACATTGTCACAATGACCGTGGTTGCGGTGTCGCCGCCACAGAGTTAG  
GTATGCTTGCAGGTGCCGACCGTGTAGAAGGATGTCTCTTTGGTAATGGTGAACGTACAGGT  
AATGTGGACTTGGTTACTGTTGCTATGAATATGTATACCCAAGGTGTTTCTCCTAATTTGGA  
TTTCTCTGACTTGACCTCTGTCTTAGATGTGGTTGAGCGTTGTAATAAGATCCAGTATCGC  
AAAGAGCACCATACGGCGGTGACTTGGTTCGTTTGTGCCTTTTCCGGTTCTACCAAGACGCC  
ATTAAGAAGGGTTTCAACTTACAAAACAAGAAGCGTGCTCAAGGTGAAACTCAATGGAGAAT  
CCCATACTGCCATTGGATCCAAAGGACATTGGCCGTGATTACGAAGCTGTCATCAGAGTCA  
ACTCTCAGTCTGGTAAAGGTGGTGGCCGCTTGGGTTATTTTGAGATCTTTGGGTTTGGATCTA  
CCAAGAAACATGCAAATCGAATTTTCTAGCGCCGTTCAAGACCATGCTGACTCCTTGGGTAG  
AGAACTAAAATCAGATGAGATTTCCAAGTTATTCAAAGAGGCTTACAACCTACAATGACGAAC  
AGTACCAAGCTATTAGTTTAGTCAATTATAATGTTGAAAAATTCCGCCTGAACGTAGAGTG  
TTCCTGGTCAAGTCAAAGTAGGCGACCAGATCGTCGATATTGAAGGTACAGGTAATGGTCC  
AATCTCTTCTTTGGTTCGACGCCCTATCAAACCTGTTGAACGTGAGATTTGCCGTAGCAAACCT  
ACACAGAGCATTCTCTAGGTTCTGGTTCTTCTACGCAAGCTGCTTCTTACATCCATCTATCG  
TATAGGCGTAATGCCGACAACGAAAAGGCCCTACAAATGGGGTGTAGGTGTCTCCGAAGATGT  
CGGTGATTCTTTCAGTGAGAGCCATCTTTGCCACCATTAACAATATTATCCATTCTGGTGATG  
TGTCCATTCCATCTTTGGCCGAGGTGCAAGGTAAGAATGCTGCGGCATCTGGCTCTGCATAA

>YOL039W 1.52 Hot

ATGAAGTACTTAGCTGCTTACCTATTATTGAACGCTGCTGGTAACACCCCAGATGCCACCAA  
GATTAAGGCTATTTTGGAAATCCGTCCGGTATCGAAATCGAAGACGAAAAGGTTTCCCTCCGTTT

TGTCCGCTTTGGAAGGTAAGTCTGTTGACGAATTAATTACTGAAGGTAACGAAAAGTTGGCT  
 GCTGTTCCAGCTGCTGGTCCAGCTTCTGCTGGCGGTGCTGCTGCTGCCTCTGGTGATGCTGC  
 TGCTGAAGAAGAAAAGGAAGAAGAAGCCGCTGAAGAATCTGACGACGACATGGGTTTTCGGTT  
 TATTCGACTAA

>YOR271C 1.59 Hot

ATGGCATCATCAGTCCCAGGGCCCATCGATTTGCCCGAATCCCCTATGACTTATCCACGTA  
 TTGGGGTAGAATCCGCCATTGCGCAGAGATTTCCGACCCACTATGTTGTAACTACTGAGA  
 AGGACCTGGCGCATGCTAGAGAAATCATCAGTGCATATCGTCACGGTGAACAAAAGAGACT  
 ACTCCGGAGTTCTGGCGAGCCAAGAAACAACCTGGACTCCACCGTGCATCCGGACACAGGGAA  
 GACAGTTCTTTTGCCTTCCGTATGTCTTCCAACGTGCTATCAAACCTAGTCGTTACTGTAG  
 GTATGCTGACGCCTGGTTTTGGGTACGGCAGGGACTGTATTTGGCAATGGGCAAATCAATCG  
 CTAACCGTCGCCGTTAATTCCGCTAACGCAAACAATCTCATCCTATGTCCACGTCCCAATT  
 GCTCACCAATTACGCTGCCGCTGTAACCTGCGTCTGTGGTGTGCGTTAGGTCTAAATAACC  
 TAGTTCCCAGGTTGAAAAACATTTCTCCACATTCAAAGTTGATCTTGGGCCGTTTTGGTGCCA  
 TTTGCCGCCGTTGGTCAGTGCCGGTATTGTCAACGTCTTCCTAATGAGAGGCAACGAAATTAG  
 AAAGGGTATTTCTGTGTTTTGACTCTAACGGTGACGAAGTCGGAAAGTCCAAGAAGGCTGCCT  
 TCATGGCAGTTGGTGAAACTGCATTAAGTAGAGTGATTAACGCCACTCCAACATATGGTCATC  
 CCACCTTTGATTTTGGTTAGACTACAACGCGGTGTCTCAAAGGTAAGTCTCTCGGTGTGCA  
 AACTTTGGCCAATTTGGGGTTGATCTCAGTCACAATGTTCTCAGCTTTGCCATTTGCACTCG  
 GTATCTTCCCTCAAAGACAAGCAATCCATTTAAATAAACTAGAACCTGAACTACATGGCAAG  
 AAGGATAAGGATGGGAAGCCAATTGAAAAGGTCTATTTTAAACAGAGGTATTTAG

>YDL155W 1.7 Hot

ATGCATCATAACTCACAGTCTTTGAGCTCTGGACACATCAGGAGCCCCGAGGATGAAAAATGT  
 GGCACCTATAGGTAATCTTAAACACAGGACTGGATCCCTCAGTCATATTTTCATCTGCGCACC  
 CGAGGGTTCGCACTTAGCGACGTTACCAATATAGTTGCGACAACTCTAGCAACAACAGCATA  
 AGTAAGCCAAAAGTCGCCCAATTAAGAAAGATTGGATTTCAGCTGCGATAATTGAGGAAGA  
 AAGCTGGATGCGAATAGTGTGACAGAGAAAAGAAGCTGATCATAACGATTTGTTAACGG  
 ACAGGGAACAAGAGGAACCCGTTGAAGACGACGGAGAAAAGCGAAGAGGATGAAGAAGAAGAC  
 CAGGAGCCTCTACTGTTGCAACATTATGCTAGTGATACATTGGTCTGGGAGCATGCATTTAG  
 AACTTACTATAGAACTACATTAGATCCCAATGATGATGACGTGTACGATGTGGTCATGTTG  
 CCGAATTATCTAATGAGATATTCGAGTATATGAGGAAATTGGAAGACCTGTATAAACCCAAC  
 CCGTACTACATGGATAAACAACCAGAGTTAAGATGGTTCGTTTCGAAGCACACTGATTGATTG  
 GATCGTCCAAGTACATGAAAAATTTCAACTTTTACCTGAAACTCTATATCTCTGCATTAATA  
 TAATAGACAGATATCTGTGCAAAGAAGTTGTTCCCTGTAAATAAGTTCCAACCTTGTGGGTGCA  
 GCCTCACTCTTCATTGCTGCTAAATATGAGGAAATCAACTGTCTTACAATCAAGGATTTTCGT  
 ATACATGTGAGAAAACCTGCTACTCAAGGAACGACCTGCTGGACGCAGAAAAGAACTATTTTGA  
 ACGGCTTAGAATTTGAATTGGGTTGGCCTGGTCCGATGTCATTTTTTACGAAGAATCAGTAAG  
 GCAGACGATTACGAGCATGATACGAGAACACTGGCCAAATATCTATTGGAATCCACAATAAT  
 GGACCATCGACTGGTTTTCCGCTCAACCTAGTTGGTTAGCTGCCGGTGCATACCTTTCTAAGTA  
 AGATTATTCTGGGCCAAAATCAGTGGTCTCTGGCGCACGCTACTATTCCAATTATACACAA  
 GAACAAATTCTTCCGTTGGCCACCATTATTTTAGAAAATTGCAGATATGCCTCTAAACGTCA  
 TAACGCCATATGGAGAAAATATCTTTCACGTCGTTATTTGCATTCTTCACAGATCGTAGCGA  
 AGTGGATAGCATTAGCTGAACACAGAGTAGAAAAGATCTAACTAA

>YHR210C 1.63 Hot

ATGTCAAATAATAAGGCTGGCGGTGAATATGAAGTCATCACTATTGGTGATGCAAAAAAGCT  
 TCAAGCAACAATTTTCAGAGCTTGGCGCTACTTTGCTTGACTTGAAAGTGAACAACGAATCGA  
 TTGTTCTAGGATACCTGATATTCATGGCTATATATCAGATGGCTACAACATACATTGGTGCT  
 ACTGTTGGCCGTTATGCAAATCGTATTTACAAGGGCATGTTTCAGTATGGAAGATGGACCTCA  
 TCAGTTGACAGTGAACAATTGTGGAACACCAACCACAGTAGCATCAGCTCCTTCCATCTCA  
 AGAAGTATAAGGCATCCAAAGTCCAAAATCCTCTTGATGACCTTTACATTGTTGAATTTACG  
 TTATTGGATGACCGCACACTGCCCAATGAATTTCCGGGAGATCTAGCTGTAAACTTAAAGTA  
 CACATTGAACGTTGCTGACATGACCTTGGACTTGGAAATACGAGGCAAAACTGGTCAGCGGTG  
 AGGCTACTCCCATCAACATGACGAATCACACGTAATTTCAATTTAAACAAAACCTATGGATAAA  
 AAATCCATTAGCGGTACGGAGGTTAGGCTCTGCTCAGATAAATCATTGGAAGTAAGCGAAGG

AGCACTAATTCCAACCGGTAAAATCGTTCAAAGAAAAATTGCTACTTTTGACTCCTCCAAAC  
 CTACCATTCTGCAGGATGATGGCCCGATTTATGACTACGCTTTCATTGTTGATGAAAATAAG  
 AATTTGAAAACGACAGACTCAGTAAGTGTAAACAAGCTCGTCCCTGCCTTCAAGGCTTATCA  
 TCCGGCATCACGACTTTCATTGGAGGTTTCAACAACAGAACCAACTGTCCATTTTACACAG  
 GTGACAACCTTGTGTGATGGATTTACGCCGAGATCTGGCTTGGCCGTTGAACAAGGCAGATAT  
 GTTGACGCAATCAACCGTGATGGATGGAGAGACTGCGTTCCTTTGAGACGTGGTGAGGTATA  
 TACTTCTAAGACTCGATATCGTTTTGCGGTGTAG

>YGL198W 2.26 Hot

ATGTCATACGGAAGAGAAGACACTACGATTGAGCCCGACTTCATAGAACCAGATGCACCTTT  
 GGCTGCTTCCGGGGGTGTTGCTGACAACATAGGCCGGAACATGACAGAATTCAGGCAGCAGAG  
 GGACGCTCGACGAGACTGTGCTGCAAACACTAAAGCGAGATGTGGTGGAGATTAATTCCAGA  
 CTGAAACAAGTGGTATACCCGCATTTCCCTCATTCTTTAGCCCTCTGATGACGGGATAGG  
 GCGGCTGATAACGACATTTCCAGCCAATTGCGACCTGTGGGCGCCCTTGCCTTATCATAT  
 TGTATTCTCTATTTGTATCGCATGCGCGGTGCTGTTCTCGAGCCTATTTGTGTCTAGTTGG  
 TTCATTTTGTGGTGTGATGGCATTGCATCTGAGACTCACCAAGCCACACCAGAGGGTGTGCT  
 GATTTTCGTACATCTCCATTTCCGGGTATTGCTTATTCCCACAAGTGCTGAATGCCTTAGTCT  
 CGCAGATACTACTTCCATTGGCTACCATATTGGAAAGCAAATCGCTGGATTGTGAGGGTCT  
 CTGTGCTCGTCAAAGTGGTGGTTCATGGCGCTGTGCTGATGTGGTCTGTGGCCGCGTTTC  
 GTGGGTTACCAAGAGCAAGACCATTATCGAGATATACCTCTGGCACTCTGTCTTTTGGCA  
 TGGCCTGGTGTCAACTATTTTATAA

>YOR376W 1.67 Hot

ATGAAAAACAGAAAATTTTCCAATCTTCTTACTTAGATTACGTATACTTTGCTTTAACAA  
 GAAGCCGGCCTTTGCTGCTACTTCTTACGCTTCTTCTTCCGCAATTTTTCAGTGCTGATTT  
 TCATTATGGTACCTGATGAAAAAGAAAACGGCGCAGCAGCTGATAACAGCTTCTCTCTGCTG  
 ATTTGGACGTGGGGTCTGACTATTTCTTTTTTATTGCCCCACCGCACTGAAAATGCATGGGCC  
 GGTTCGGCGCATTTGGTTCTGCGATAAGAATATCGAGGCCATCCAATCAGATGGTCAGATAA  
 GGTATTAAGATCAGGCCCGTTCCATGGAGTCATGGAACCTGCATAAGGGGAGCCTGA

>YNL072W 1.79 Hot

ATGGTACCCCCACGGTAGAAGCATCCTTGGAGTCTCCTTACACTAAGTCGTACTTTTCCACC  
 TGTCCCAAGCGCGCTCTTGGAACAGAATGACTCTCCAATAATAATGGGTATCGATGAAGCTG  
 GCAGAGGGCCCGTATTAGGGCCAATGGTCTACGCAGTAGCCTATTCTACACAGAAATATCAG  
 GACGAAACTATAATCCCTAACTACGAGTTTGACGACTCTAAAAAAGTTACAGATCCCATCAG  
 AAGAATGCTGTTTTCCAAGATATACCAGGACAACGAAGAATAACCCAGATCGGCTACGCAA  
 CTACGTGCATCACTCCGTTGGATATCTCTAGAGGAATGAGCAAGTTCCACCGACGAGAAAC  
 TATAACTTGAATGAGCAGGCGCACGATGTCACAATGGCACTCATTGATGGCGTGATAAAGCA  
 GAACGTGAAGCTCAGTCACGTGTATGTGGATACTGTTGGACCACCAGCGTCCATCAGAAGA  
 AACTGGAGCAACGATTTCTGTTGTCAAGTTTACGGTCCGCAAGAAGGCAGACTCGCTCTAC  
 TGCATGGTTCAGTGTGGCGAGTGTGCTGCAAAAAGTGACCAGAGATATACTAGTCAATCCTT  
 GAAGAGGGATCCCGATGAGATCCTGGGTTCTGGATAACCCCTCCGACCCGAAGACAGTCGCAT  
 GGCTGAAGCGCAACCAGACAAGTCTTATGGGCTGGCCCGCAACATGGTAAGATTCTCATGG  
 CAGACATGCCAGACTCTGTTAGATGACGCCAGTAAGAATAGTATCCCTATCAAGTGGGAAGA  
 ACAATATATGGACAGCAGGAAGAAGCCGACAAAAAACAAGCAATTGCAGCTCCAGATGG  
 TCGCTAAGCCTGTTAGAAGGAAGAGGCTGAGAACCCTAGATAAATTGGTACCGGTGA

>YIL040W 1.67 Hot

ATGGACGCTACTCAACCGCAATACGAACATCCGTTAGTAACACAATGCCTAAAGTCTGCCAT  
 TGACGTCATCCAATGGTTGATTCCCTACTATTACTAAGTTCAGCCAATCACACCCGTTAGTTT  
 TCCAACATATTGTTTATTTTCTTACATTTTATGTCTTTTACAAGTTGTTGATGAACTTCATT  
 ACTCTGGTCAAAAAGATTCCCTGTATTTGACGTTGGTAGTAACATGTATCGGTATTTATATGCC  
 TGGTTCGCAGCAGTTTTTACTGTGGACCTGTTGAATTTCTACAATTTCTGTCATGTCAAATA  
 GATACTACGCATTTAAAATTTATACTCTGTTTATTAATGCCCTGGAAAGAGAAATCAACACT  
 GTTATCATTTGGCGCAGATGAAAATGGAACAGTTGCTTAAATAG

>YAL034C 1.52 Hot

ATGGGATTATATTCCTCTGAATCTGAAAAGTCTCAATTAATATGAATTACATTGGTAAGGA  
 TGATTCGCAGTCCATTTTCAGACGTCTGAATCAGAATTTGAAAGCAAGTAACAACAATAACG  
 ATAGTAATAAAAAACGGTTTAAACATGAGTGATTATAGCAATAATTCACCCATATGGGCGCTCG  
 TACGACGTAAGAATTAACCAGAACTCACAAAATAATGGCAATGGATGCTTTTCTGGCAGCAT  
 TGACTCCTTGGTTGATGAACATATAATACCATCGCCACCTTTGTCTGCCAAGCTGGAGTCGA  
 AAATTAGCCACAATGGCTCACCCCGCATGGCCTCTCAGTGCTAGTGGGATCTACGCCTAAA  
 GGCCTGTAGAGAATGTGCTGTTCTGTAAGCCTGTATGGCCCAATGGGTATCAAGAAAAAG  
 GTACCGCTACGCCACCTACGGGTTTCTGTCTCAATACAAAATTTTCAGCAATTTGGCCCAAC  
 CATATTCTAAGAACATTATCAACCGGTACAACAATCTGGCCTATAATGCTAGACATAAATAT  
 TCCAAATACAATGATGATATGACTCCTCCTCCTCTGCCTTCCTCTTCTCTAGATTACCTTC  
 CCCGTTAGCATCTCCGAATTTGAATAGACAAGCAAGATATAATATGAGGAAACAGGCTCTCT  
 ACAATAACAATCTAGGAAAGTTTGAATCCGACACTGAATGGATACCACGGAAACGCAAGGTA  
 TACTCACCACAAAAGAAGAACGATGACTACCAGTCCACATCGCGCCAAGAAGTTCTCACCCTC  
 TGCATCCACTCCTCACACTAACATTGCATCCATTGAGGCGATTATGATGCTCCTCAATATA  
 TACCAAACGTCTCATGGAAAAAATTACCAGATTACTCTCCGCCCTTATCTACGCTTCTTACA  
 GACAGTAACAAGTCACTCAAGATCGAGTGGAAAGGGTCTCCAATGGACCTGTCCACAGACCC  
 GCTGAGGAACGAGCTACACCTGCTGAACTAGTTCTCGCTCAAACCTCTAAGGTTACCTTGTG  
 ATTTGTATCTGGATTCTAAGAGAAGGTTATTTTTGGAAAAAGTTTATAGACTAAAGAAAAGGG  
 TTGCCGTTTAGAAGGACCGACGCCAAAAAGCCTGTAGGATCGACGTTAATAAAGCATCAAG  
 ACTATTCGAAGCTTTCGAGAAGGTTGGCTGGCTACAGGATTCGAATTTTACGAAGTACTTAT  
 AA

>YGR210C 1.93 Hot

ATGCCCAGGGATCCATTGATTGGTATTGTGGGTAAGCCATCTTCAGGGAAATCCACCACATT  
 AAATTCCTTTGACGGACGCAGGTGCGGCGGTAGGAGCATTTCCTTTTACCACGATCGAGCCAA  
 ATCAGGCAACCGGCTACTTGCAAGTTGAGTGTGCTTGCTCCAGATTTGGCAAGGAAGATCTT  
 TGTAACCTAACTACGGGTGGTGTAGCAAGGGTAAGAGGCATATCCCCATCAAACCTGTTGGA  
 TGTGGCAGGGCTTGTGCCTGGAGCGCATTCCGGCAGAGGGCTTGAAATAAATTTCTTGATG  
 ATTTAAGACACGCAGATGCTCTTATTATCATGTGGTGGACGTTAGTGGAAACCACAGATGCAGAG  
 GGAAGAACACAAGAGGATATGATCCATTGAACGATATAGAATGGCTGCAAGACGAAATCAG  
 GCTTTGGGTTGAGGGAAACCTGAAGAAAAGATGGGGTCTATTGTGCGTAAACATACAGCAA  
 CGAAATCTAGCATAGTGGACACACTTCAAGCGCAATTCGGTGGGTACGGTTCCATGCGCCC  
 ATGATCCAAAAAGCCCTGGACAGGTTGAAGGGACTACCACCTTTGGAAAAATGGGATGACGA  
 ATGGATCACTCGAGTGGTCAAGTCCCTTTATGATGGAGAAATTTCCAACCTGTGTTGGCACTCA  
 ACAAGATTGACCACCCTGACGCCGATAAAAAATGTTTCTAAAATCATGCTAAAGTATCCTGAC  
 ACCAAAGCTGTACTGACCAGTGCAGTGCAGGAAAGTTTTTTTTGAGGAAATGAAAAAGCAAGG  
 TTTTATATTATACGAGGAGGGCACGGAATTTGTTGACACATTTGAGGACGAGCCAGACAAAC  
 TAAAGCCACTGGACGACAAGATCCTTAACAGAATTGAAAATATCAGAGATTTGGTCTCTGAT  
 AGATTCCGATCTACGGGTGTTGTTTCAGGTTCTGCAAGCAGCAACGGACATCCTTGGTCTAAT  
 ACCGGTGTACACTGTGAAGAACATCCAGACTTTTACGGGTGGCAACGGAACCAACGATTTTA  
 GAGATTGTTTTTTGGTCAAGCGAGGAACCCCTGTTGGCAAAGTTGCCAGGTATATCATGGGT  
 GCGAGGTCACCATTTGCAAGCATTGAAACCGTTGGCGGCGTGAGAGTCAGTGAAGAAAAGTCT  
 TGTGAGCCCGGTAAGAATGACATACTCGGCTTCAAGATCGCTCCAAGATCAGCATAA

>YJR079W 1.58 Hot

ATGAAGATAAAAAATTGACATTATACATTTTATTAACGCCCCCCCTTTTTTTTTTTTTTTTGT  
 TGATGCAGAAGCCTCGCAACTTAAAGCTTTTCAGTTGTTTCTTCTTGGTCATATTTTTTATA  
 CATATATACATACATATATTTGTGATTTTGATGAGTTCGAGACTAAAGACCTTGCAGAGGGA  
 AAGATAGGCGATTTGATTTCCAGACTGGAGTCTGTTCAAATGCGATAATTGAATCCTTGCC  
 AAATACATTCGAATCCTTTGTCCCGGTCAAATTCAGTACGGACAAGCTTCTTGAAGAATCGA  
 AAGGTCTTCTCGATGTTTGA

>YLR378C 1.83 Hot

ATGTCCTCCAACCGTGTCTAGACTTGTTTAAGCCATTTGAATCTTTCCTGCCGGAAGTGAT  
 TGCTCCAGAAAGGAAGGTTCCATACAACCAGAACTTATCTGGACAGGCGTTTCTCTACTGA  
 TCTTTTTGATTCTGGGCCAGATTCGCTGTACGGGATCGTGTCCAGTGAGACTTCCGACCCT  
 CTGTAAGGCTACGTGCCATGCTGGCCTCCAACCGTGGTACTTTACTGGAATTTGGGTGTTTCT

GCCATCATCACTTCATCTATGATTTTCCAATTTTTGCAGGGTACTCAGCTTTTACAAATCA  
 GACCTGAGAGCAAGCAGGACAGAGAGCTGTCCAAATTGCTCAAAGGTGTGCGCTATTATT  
 CTGATCTTGGGCCAAGCCCTTGTGGTCGTCATGACAGGTAACACGGTGCCCTTCGGACCT  
 CGGATTGCCATCTGTTTGTGTTAATCTTCAATTGATGTTTGCATCGCTGATTGTGATGT  
 TATTAGACGAATTGCTATCTAAGGGTTACGGCTTGGGTCCGGTATTTCTCTGTTACGGCA  
 ACCAATATTGCCGAACAAATTTCTGGAGAGCGTTTGGCTCCTACTACAGTCAATTCCGGTCG  
 TGGTAAGGAGTTCGAAGGTGCTGTGATTGCCTTTTTCCATCTTTTGGCTGTCAGAAAGGACA  
 AGAAAAGAGCCCTTGTGCGAGGCCTTTTACCGTACCAATCTACCTAATATGTTCCAAGTGTG  
 ATGACCGTGGCCATCTTCTCTTTGTTTTATATTTACAAGGCTTCCGTTACGAATTGCCCAT  
 CAGGTCAACCAAAGTGAGAGGTCAAATTGGTATCTACCCATCAAACCTTTTTATACTTCCA  
 ACACCCCAATCATGTTGCAGAGTGCATTGACTTCTAACATTTTCTTGATCTCTCAAATCCTT  
 TTCCAGAAATACCCAACCAATCCATTGATTGCTTTGATCGGTGTTTGGGGTATCAGGCCGGG  
 CACCCAGGGCCCTCAAATGGCCTTGAGCGGGTGGCCTACTACATCCAACCATTAATGTCTT  
 TATCCGAAGCTCTTCTGGACCTATCAAGACCATCGTCTACATCACATTTGTTCTTGGTTCA  
 TGCGCAGTATTTTCCAAGACATGGATCGAAATCTCCGGCACTTCCCCACGTGACATTGCCAA  
 ACAATTCAAAGATCAAGGCATGGTCATTAACGGTAAGAGAGAAACCTCCATTTACAGAGAAT  
 TGAAGAAGATCATTTCCAACCTGCTGCTGCTTTCGGCGGTGCTACCATCGGTGCTCTTTCTGTT  
 GGCTCCGACCTACTAGGTACTTTAGGTTCTGGGGCATCCATTTTGATGGCTACTACCACCAT  
 CTACGGCTACTACGAAGCTGCCGCCAAGGAAGGTGGGTTTACTAAGAACCCTCGTTCCAGGAT  
 TTTCTGATTTGATGTGA

>YNR017W 1.85 Hot

ATGTCGTGGCTTTTTGGAGATAAGACACCTACCGATGATGCGAATGCTGCCGTGGGCGGCCA  
 AGATAACAACCAAGCCTAAGGAACATCGTTGAAGCAGAGTTTAGGTTTCGAGCCAAACATCA  
 ATAACATAATATCAGGTCCTGGTGAATGCATGTCGACACCGCTAGGCTGCATCCTTTGGCT  
 GGTCTAGACAAGGGTGTGGAGTATTTAGATCTGGAAGAACAACATATCCTCGTTAGAAGG  
 CTCACAGGGTCTGATCCCTTCCCGTGGGTGGACCGATGACCTATGTTACGGTACCGGTGCCG  
 TCTACCTGCTGGGACTTGGTATCGGAGGGTTTTCTGGTATGATGCAGGGTCTGCAGAAATTT  
 CCGCCCAATAGTCCCGGAAAATTGCAATTGAACACCGTCTGAATCACATTACTAAGAGAGG  
 TCCCTTCTTAGGTAATAATGCGGGGATTTCTCGCGTTGAGCTACAATATCATCAATTTACAA  
 TAGATGCACCTAAGAGGCAAACATGACACCGCGGGCTCCATTGGCGCTGGGGCCCTCACGGGC  
 GCTTTGTTCAAGCTTTCAAAGGTTTTGAAACCCATGGGTTATTCCTCGGCAATGGTGGCCGC  
 TGCGTGCGCCGTCTGGTGTAGTGTCAAGAAAAGACTACTTGAAAAATGA

>YJL065C 1.88 Hot

ATGAACAACGAGACTAGTGGTAAAGAAACGGCGTCTGCACCTCTGTGTTCCGCCAAGTTACC  
 TGTAGAAAAAGTGCAGAGAATAGCCAAGAATGATCCAGAATATATGGACACTTCGGATGACG  
 CATTCGTAGCCACAGCGTTTGGCTACAGAATCTTTCGTCCAGGTGCTGACACATGAGTCCCTA  
 CATAGGCAACAGCAGCAGCAACAACAACAGGTACCGCCGCTCCCAGATGAACTCACGCTGTC  
 GTACGATGACATCTCTGCCGCAATTGTGCACCTTCTGACGGCCATCTGCAGTTTTTTGAATG  
 ATGTGATACCAACAACAAGAATTTGAGGCTTCTAGTGGAAGAAAACCGAGTTAGATATACT  
 ACAAGTGTGATGCCCCCTAATGAAGTTTACTCCGCCTATGTGGTGAACGATACGGCTCCGAA  
 GCCCAACATTGTCGAGATTGATCTTGATAATGACGAAGACGACGACGAAGACGTTACTGATC  
 AAGAATAA

>YBL076C 1.58 Hot

ATGTCCGAGAGTAACGCACACTTCTCATTTCCAAGGAGGAAGAAAAAGTTCTATCTCTTTG  
 GGATGAAATAGATGCCTTTTCATACTTCATTAGAATTAACAAAAGACAAACCGGAGTTTCCCT  
 TCTTCGATGGGCCTCCATTTGCCACCGGTACTCCTCATTACGGTCATATTTCTTGCTTCCACT  
 ATTAAGGATATTGTTCCAAGATACGCTACCATGACAGGCCACCACGTGGAAAGAAGATTCGG  
 TTGGGATACACACGGTGTTCCAATTGAACATATCATTGACAAGAAATTAGGTATCACGGGTA  
 AAGATGACGTCTTCAAGTATGGTCTTGAACACTACAACAATGAGTGTAGATCCATTGTTATG  
 ACTTATGCCAGTGATTGGAGAAAACTATTGGTCGTTTGGGTCGTTGGATTGATTTGCACAA  
 CGATTACAAGACTATGTATCCATCCTTTATGGAGTCCACATGGTGGGCTTTCAGCAACTTC  
 ATGAAAAAGGTCAAGTTTACCGTGGATTCAAAGTTATGCCTTATTCTACTGGCCTAACCACT  
 CCTTGAGTAACTTTGAAGCTCAGCAAACTATAAAGATGTTAACGACCCAGCTGTGACCAT  
 TGGTTTCAATGTATTGGCCAGGAAAAAATCAATTGGTTCGATGGACTACGACTCCATGGA



CTTTACCTTCCAATTTGTCGTTATGTGTTAACGCTGATTTTCGAATATGTAAAGATTTACGAC  
GAAACCAGAGATCGTTATTTTCATCTTATTAGAATCTTTGATTAACCTTGTATAAGAAGCC  
TAAGAATGAAAAATATAAGATTGTGGAAAAAATTAAAGGTTCTGATTTGGTTGGTTTGAAGT  
ATGAACCATTGTTCCCATATTTTCGCTGAACAGTTCCATGAAACAGCTTTTAGAGTTATTTCA  
GATGATTATGTTACTAGTGATTCCGGTACTGGTATTGTTTCATAACGCTCCCGCTTTTCGGTGA  
AGAGGATAATGCTGCTTGTGTTGAAGAACGGCGTCATATCCGAAGATTAGTGTACCTAACG  
CCATTGATGACCTTGGTAGATTACGAAAGACGTTCCCTGATTTTGAGGGTGTATTATGTCAAG  
GACGCTGATAAGTTGATTATTAAGTACTTAACATAACTGGAAATTTGTTATTGGCATCCCA  
AATTCGCCATTCCATCCATTCTGTTGGAGATCCGATACCCATTGTTATACCGTTCTGTTTC  
CAGCTTGGTTCGTTTCGTTGTTAAAAACATTGTCCTCAAATGTTGGATTCTGTGATGAAATCT  
CACTGGGTTCCTAACACCATCAAGGAAAAGAGGTTCCGCAACTGGATCGCCAATGCCCGTGA  
CTGGAACGTTTCCAGAAATAGATATTGGGGTACTCCAATTCCTTTATGGGTTTCAGACGATT  
TTGAGGAGGTCGTCGTGTTGGTCTATCAAAGAATTGGAAGAATTGACCGGTGTGCGTAAC  
ATCACTGACTTGCATCGTGATGTCATTGACAAATTGACAATTCATCCAAGCAAGGTAAGGG  
TGACTTAAAGAGAATTGAAGAAGTTTTTGGATTGTTGGTTGAATCTGGTCTATGCCTTATG  
CTTCTCAACATTATCCATTTGAAAACACAGAAAAATTTGACGAAAGAGTTCAGCTAATTTTC  
ATCTCTGAAGGTTTGGATCAAACAAGAGGTTGGTCTACACGTTAGCTGTCTTAGGTACCCA  
TCTATTTGGCTCTGTTCCATACAAGAAGTCATCGTCTCTGGTATTGTCTTAGCTGCCGATG  
GTAGAAAGATGTCTAAATCCTTGAAAAATTACCCTGATCCATCCATTGTTCTGAACAAAATAT  
GGTGC GGATGCATTAAGATTGTACTTGATAAACTCACCTGTTTTAAAAGCTGAAAGTTTGAA  
ATTCAAAGAAGAGGGTGTAAAGGAGGTTGTTTCAAAGGCTTACTACCATGGTGGAACTCCT  
TTAAATTTTTGGACGGTCAAATTCCTTGTGAAAAAGATGTCTAACATCGACTTCCAATAT  
GATGATTCTGTGAAAAGTGATAATGTCATGGACAGATGGATTTTAGCTTCTATGCAATCTCT  
AGTACAATTCATTCACGAAGAAAATGGGTCAGTACAAATTATACACTGTCGTTCCAAAACTTT  
TGAAATTTTCATTGATGAATTGACAACTGGTATATTAGATTTAATCGTCGTCGTTTGAAGGGT  
GAAAACGGTGTGAGGACTGTTTGAAGCATTAATTTCTTTATTCGATGCCTTATTCACATT  
TGTCCGTGCCATGGCTCCATTCACCCATTTTTTGTGAGAAAGCATTTATTTGAGACTGAAGG  
AATACATCCCAGAAGCTGTCTTAGCAAATAACGGTAAGGACGGAAGATCAGTCCATTTCTTA  
TCTTACCCAGTGGTCAAGAAAAGATACTTTGACGAGGCCATCGAAACTGCAGTTTCTAGAAT  
GCAATCCGTTATCGATTTGGGTAGAAACATTCGTGAAAAGAAAACATTTCTTTAAAAACTC  
CATTGAAGACTTTGGTTCATCCTTCACAGTGATGAATCATACTTGAAGGATGTAGAAGCCTTG  
AAAACTACATTATCGAGGAATTAATGTTCTGATGTTGTTATCACCTCCGATGAGGCAA  
ATATGGTGTGAGTATAAAGCAGTTGCTGATTGGCCTGTATTGGGTAAGAAGTTGAAAAAAG  
ACGCAAAGAAGGTTAAAGATGCCCTACCATCAGTCACTTCTGAGCAAGTACGGGAATATTTG  
GAAAGCGGAAAGTTGGAGGTTGCCGGTATTGAACTGGTTAAAGGAGATTGAAATGCTATTAG  
AGGCTTGCCAGAATCTGCTGTCCAAGCTGGACAAGAAACCAGAACCAGCAAGACGTGTTAA  
TCATCATGGATACAAATATTTACTCTGAACTAAAGAGTGAAGGTTCTCGCAAGAGAGCTGGTC  
AACAGAATCCAAAAATTGAGAAAGAAGTGTGTTTTGGAAGCCACCGACGATGTTTTAGTGG  
GTACGAATTAGTTAAAGATACTATCGACTTTGAAGCCATTGTCAAAGAACATTTTGTATATGT  
TAAGCAAGACCTGTAGATCCGACATTGCCAAATATGACGGCTCAAAGACAGACCCAATTGGT  
GATGAAGAACAATCTATTAATGACACCATTTTCAAATTAAGTGTTCAAATTATGA

>YEL046C 2.13 Hot

ATGACTGAATTCGAATTGCCTCCAAAATATATCACCGCTGCTAACGACTTGCGGTTCAGACAC  
ATTACCCTCCAACGCAGAGATGATGGAGCCGCTTTAGAGCCCTCTATCGGTGACGCTG  
TCTACGGTGAAGATGTTGACACCGTTAGGCTCGAACAGACCGTTGCCCGCATGGCTGGCAA  
GAAGCAGGTTTGTCTGTGTCTCTGGGACTTTGTCCAACCAGATTGCCATCAGAACTCACTT  
GATGCAACCTCCATACTCTATTTCTATGTGATTACAGGGCTCACGTTTACACTCACGAAGCCG  
CTGGACTGGCGATCTTGTCTCAAGCGATGGTGGTTCCTGTGGTTCCTTCCAACGGTGACTAC  
TTGACCTTGAAGACATCAAGTCACACTACGTCCCAGACGACGGTGATATTCACGGTGGCC  
CACCAGATTGATTTCTCTGGAAAACACTTTACACGGTATTGTTTTATCCATTGGAAGAATCG  
TCCGCATCAAAGCTTGGTGTATGGAAAATGGTCTCAAACACTACATTGTGACGGTGCCAGAATC  
TGGAATGCCGCTGCACAATCTGGCGTGCCATTAAAGCAATATGGGGAAATCTTCGACTCCAT  
CTCCATCTGTCTATCCAAGTCTATGGGTGCTCCTATTGGGTCCGCTTGGTTGGGAACCTTA  
AGTTTGTCAAGAAGGCCACCCATTTAGAAAACAACAAGGTGGTGGTATTAGACAATCTGGT  
ATGATGGCTAGAATGGCTCTTGTAACATCAACAACGATTGGAAGTCCAATTGCTGTACTC  
GCACTCTTTGGCTCATGAATTAGCCGAATATTTGTGAGGCAAAGGGCATCCCGCTAGAGTCTC

CAGCAGACACCAACTTTGTCTTTATTAACCTGAAGGCCGCTAGAATGGACCCAGATGTCCTT  
 GTTAAGAAGGGTTTGAAGTACAACGTTAAGCTAATGGGTGGTAGAGTCTCGTTCCACTATCA  
 AGTCACCAGAGATACTTTGGAAAAAGTCAAATTTGGCCATCTCCGAGGCCCTTCGACTATGCTA  
 AAGAACATCCTTTCGACTGTAACGGACCTACCCAGATTTACCGTAGTGAATCCACCGAGGTC  
 GACGTTGATGGCAACGCTATCCGCGAAATAAAAACCTACAAATACTGA

>YAL033W 1.54 Hot

ATGGTACGTTTAAAAAGTAGATATATCCTTTTTGAAATTATATTTCCACCTACAGACACCAA  
 CGTTGAGGAATCTGTGTGCGAAAGCAGACATCTTGCTTTTCGCATCACAGAGCATCGCCTGCGG  
 ATGTGTCCATAAAGTCGATACTCCAAGAGATACGACGCTCGCTGTCGTTGAATCTGGGCGAC  
 TATGGGTCTGCAAAATGTAACCTCTCTTTCGAGTTGAAATACTTTTCAAATAAGACGTCCTAC  
 GGGGATAATCCGATGCCATCGAGAGGATTGCGACCTTGTATCATGGCATTGATGTTGATGT  
 CGAAAATTGGCGACGTCGATGGACTGATCGTGAACCCCGTCAAGGTAAGTGGGACCATCAAG  
 AAAATAGAGCAGTTTGCTATGAGAAGGAATTTCTAAAATTTCTGAACATAATCAAGTGTAGTCA  
 ATCATCACACCTCAGCGATAATGACTTTATTTATCAATGATTTCAAGAAAAATTGGAAGGGAAA  
 ACGAAAACGAAAACGAGGACGATTAG

>YGR205W 1.62 Hot

ATGTGTGATAAGTCAAAAACGGTATTGGACTACACGATAGAATTCTTTGGATAAATATATACC  
 TGAATGGTTTTGAGACGGGAAAATAAATGCCCTTGTTTCATTTTCTTCTCGGGCCCAAGGCT  
 CAGGCAAAAGTTTTACAAGTATCCAAATCTATAACCATTTGATGGAAAAATATGGGGGTGAA  
 AAATCTATCGGTTACGCCTCAATTGATGATTTTTATTTAACTCACGAGGACCAATTGAAACT  
 CAATGAGCAATTCAGAACAATAAGCTGTTACAAGGACGTGGTTTTACCAGGTACTCATGATA  
 TGAATTGTTGCAAGAGGTATTGAACACCATCTTCAATAATAATGAACATCCGGATCAAGAT  
 ACTGTCGTACTACCCAAGTACGATAAATCCCAATTTAAAGGAGAAGGGGACCGTTGCCCCAC  
 TGGTCAAAAAATCAAGCTACCAGTCGATATTTTTATCTTAGAAGGTTGGTTCCCTCGGGTTCA  
 ACCCCATTTTGAAGGAATTGAGAATAATGATCTTCTTACTGGGGACATGGTTGATGTCAAT  
 GCCAAGCTCTTCTTCTATAGCGACTTGTTGTGGCGCAACCCAGAAATCAAATCTTTAGGGAT  
 AGTATTCACCACCGATAACATTAACAATGTTTATGGCTGGAGACTACAACAGGAGCATGAAC  
 TAATATCAAAGGTCGGAAAGGGGATGACCGACGAACAAGTGCATGCTTTTGTGGATAGATAC  
 ATGCCCTCCTATAAACTTTATTTGAACGACTTTGTCCGGAGTGAAGTTTAGGTTCCATTGC  
 TACATTTGACGTTAGGAATCGACTCCAACAGGAATGTATATTCTACGAAAACGAGATGTATTG  
 AATAG

>YLR350W 2.44 Hot

ATGATTGACCGCACATAAAAACGAATCTCCAGCTTTTGAAGAGTCTCCGCTTACCCCCAATGT  
 GTCTAACCTGAAACCATTCCCTTCTCAAAGCAACAAAATATCCACTCCAGTGACCGACCATA  
 GGAGAAGACGGTCATCCAGCGTAATATCACATGTGGAACAGGAAACCTTCGAAGACGAAAAT  
 GACCAGCAGATGCTTCCCAACATGAACGCTACGTGGGTGCGACCAGCGAGGCGCGTGGTTGAT  
 TCATATCGTCGTAATAGTACTCTTGAGGCTCTTCTACTCCTTGTTTCGGGTGCGACGCCAAAT  
 GGACGTGGACTTTAACAACATGACCTACATCGGATTTCTATATCATGTTCCACCTTGTC  
 AAAGGTACGCCCTTCGACTTTAACGGTGGTGCCTACGACAACCTGACCATGTGGGAGCAGAT  
 TAACGATGAGACTTTGTACACACCCACTAGAAAATTTCTGCTGATTGTACCCATTGTGTTGT  
 TCCTGATTAGCAACCAGTACTACCGCAACGACATGACACTATTCCTCTCCAACCTCGCCGTG  
 ACGGTGCTTATTGGTGTCTGTTCCCTAAGCTGGGAATTACGCATAGACTAAGAATATCCATCCC  
 TGGTATTACGGGCCGTGCTCAAATTAGTTAG

>YOL021C 1.59 Hot

ATGTCAGTTCCCGCTATCGCCCCAGACGGAAAGAGACTTGCAGATGGTTTAAAGCGTCACTCA  
 GAAGGTGTTTTGTAAGGTCTCGTAATGGAGGCGCTACCAAGATCGTAAGAGAACACTATTTAA  
 GATCGGACATCCCATGTCTTTTCGAGAAGTTGTACCAAGTGTCCGCAAAATGTCGTCCCCGAT  
 GCTCAAAATGAGTTGCCGAAGTTCATCTTGTGATTTCTCCCTTAGAATTAAGCGCACCCAT  
 TGGTAAGCATTACGTCGTCTTGGATACCAACGTGGTGTACAGGCAATTGACCTTTTAGAGA  
 ATCCGAATTGTTTTTTTCGACGTCATTGTCCCCAGATTGTCCCTAGATGAAGTGAGAAACAAG  
 TCATATCCGGTGTACACGAGATTAAGAACTCTATGCAGAGATAGTGACGATCATAAGAGATT  
 CATCGTGTTCATAACGAATTTAGTGAACATACTTTTGTGGAAAGGCTTCCAAATGAAACGA  
 TTAATGACAGAAAACGACAGGGCTATAAGGAAAACCTGTCAATGGTATAGTGAGCACTTGAAA

CCTTATGACATAAACGTCGTTCTTGTACCAACGATCGTTTGAATAGAGAAGCTGCCACTAA  
 GGAAGTGGAGTCCAATATAATAACCAAGAGCTTGGTACAGTATATCGAGTTACTACCAAATG  
 CAGACGACATCAGAGACTCTATTCCTCAAATGGATTCTTTTGATAAAGATCTTGAAAGGGAC  
 ACATTTTCAGATTTACGTTCCCGGAGTACTATTCTACAGCAAGAGTAATGGGTGGTTTGAA  
 AAATGGCGTTTTGTACCAGGGCAATATTCAAATATCAGAGTACAACCTTCTAGAAGGTTGAG  
 TGAGTTTACCAAGATTTTCCAAACCAGTGTAAATTGTTGGGCAGAAAAACCTAAATAGAGCA  
 TTCAACGGTGACCAGGTTATCGTGGAAGTCTACCTCAATCAGAATGGAAGGCACCCTCATC  
 CATGTCTTGGATTCTGAACATTTGACGTTAACGATAACCCCGATATTGAGGCTGGCGATG  
 ACGATGACAATAATGAGTCCTCTTCCAATACCACCGTGATTTCCGACAAGCAGCGCAGGCTG  
 CTTGCTAAAGATGCTATGATAGCTCAAAGATCGAAAAAAATTCAGCCCACGGCAAAAGTTGT  
 ATATATACAAAGAAGATCCTGGAGACAGTACGTCGGTCAACTAGCACCAAGTTCTGTTGATC  
 CACAAAGCAGTAGTACACAGAAATGTCTTCGTTATTTTGATGGACAAATGTCTTCCAAAAGTC  
 AGAATCAGAACAAGGCGTGCTGCTGAATTATTGGATAAAGAGGATTGTCAATTTCCATTGATTC  
 GTGGCCCACTCATAAATACCCATTAGGTCACCTTGTGAGAGACCTCGGTACAATTGAAT  
 CTGCTCAAGCTGAAACAGAGGCCCTTATTGTTGGAGCATGATGTTGAATATAGGCCTTTTTCC  
 AAGAAAGTTCTAGAATGTTTGCCCGCAGAAGGCCACGATTGGAAGGCCCAACAAAACCTGGA  
 CGATCCTGAGGCTGTTTTCAAAGGATCCATTATTGACAAAAAGAAAGGATCTCAGAGATAAAC  
 TTATATGTAGTATCGATCCTCCAGGATGTGTTGATATTGACGATGCCCTACATGCGAAAAAG  
 CTTCCAAACGGTAATTGGGAAGTTGGTGTTCATATTGCTGATGTTACTCACTTCGTTAAACC  
 GGGCACTGCCCTGGATGCGGAAGGTGCTGCAAGAGGTACTTCTGTATATTGGTAGACAAAC  
 GTATTGACATGCTGCCCATGCTTCTAGGTACCGACCTGTGTTCTCTAAAACCATACGTTGAT  
 AGATTTCGATTCTCTGTCAATTTGGGAATTGGATGATAGTGCTAATATTGTAATGTTAATTT  
 TATGAAATCCGTCATCAGATCTAGAGAAGCTTCTCATAACGAACAAGCACAACCTGAGAATTG  
 ATGACAAAACCCAAAATGATGAATTAACGATGGGTATGAGGGCTCTCTTGAAATTGTCTGTA  
 AAACCTGAAGCAAAAGAGACTAGAGGCAGGTGCCCTTGAACCTAGCTTCTCCTGAGGTTAAGGT  
 CCATATGGATAGTGAGACTTCAGATCCAAATGAAGTGGAATCAAAAAATTAAGTGGCGACAA  
 ATTTCTTTAGTTGAAGAATTTATGTTGTTGGCTAATATATCAGTGGCAAGGAAGATATACGAT  
 GCCTTCCCTCAAACGGCGATGCTAAGAAGACACGCAGCTCCGCCATCTACCAATTTTGAAAT  
 CTTAAATGAAATGTTAAACACAAGAAAGAAATATGTCAATTTGTTGGAATCGTCCAAGGCCT  
 TGGCCGATTCTTTAGACAGGTGTGTGGATCCCGAAGATCCATATTTAATACATTGGTTTCGT  
 ATCATGTCGACTCGCTGTATGATGGCAGCCCAATACTTTTATTCTGGAGCTTATTCTTATCC  
 TGACTTTAGACACTATGGTTTAGCCGTTGATATCTACACACATTTACATCACCTATTAGAC  
 GTTACTGTGATGTTGTGGCCCATAGACAATTAGCAGGTGCCATTGGGTATGAACCCCTAAGT  
 TTGACTCATCGTGATAAGAATAAAATGGACATGATTTGCAGAAATATCAACAGAAAGCACAG  
 AAACGCCCAATTCGCCGGTAGGGCAAGCATAGAATACTATGTCGGGCAAGTAATGAGGAATA  
 ACGAGTCCACAGAAACTGGATATGTTATTAAGGTATTTAATAATGGTATAGTCGTACTGGTT  
 CCCAAGTTTGGCGTGGAAAGGCTTGATAAAGACTGGATAAATTTGACTGAGGATCCTAACCTCAGC  
 CGCTTTTGTGATGAGGTGGAATACAAATTAACCTTTGTGCCCTACAAATTCAGATAAACCCGAGG  
 ATGTTTACGTTTTTCGATAAGGTCAAGTTCAAGTTAGGTCGGTGATGGATCCAATTACTAGC  
 AAGCGTAAGGCAGAATTATTGTTAAATAG

>YDR413C 1.54 Hot

ATGCGACTGCATATCTCCTACGCTTGTGTCGTTTGCCTTCTTTGGTTTATTCTTCGTTTC  
 ATTTTGGTCAAATATCTGAACTTTTTTACTCTTGGCTTCTTCTTTTGTCTCATCCACGC  
 CCAGAACTTCGCGTATTTGGTGGCTCTATTTATGCTTTTGTGAGTACTTTTTCTGCCTTT  
 TCTAATTTGACATATTTAGCTGGGCTAAATATTCAAAGTTATCATTGGGTTCCAATGTCTC  
 CAATTCACAGTAGTTGAGTCATCGTATATTTCCGTGATTGCTCCTTTCTTCAAATAGGCT  
 TTACGCTACTTTCAATATTGTGCTTATCGCCGTCATCTTTATCAGAATCAAACCCGTGCCAG  
 GATTCATCAGATTTACCTGCAAATCCTCCGTCTTATCATTTTTTCGCATCCTCTATCTCAGC  
 TTCCAAGTTTAACTCTCTTTAAACGCTTTAACTGTTCTTCCATCACCTCCTTACGTTCTT  
 GCCGAATCTTCTGTCTTTCTTCAATTTTTCTAAGCCTTCTCTGCTCCTTAATAAACTCTTGT  
 GCTTCTTTTGTCTTTGA

>YGL165C 1.64 Hot

ATGGTTACGTATCCTGTGCAGCCTTGGACAAATTTTATAATTGTATATATCTATGTATATGT  
 ATACGAATGGAAAAATTTATCCGAATCTCGGCCCGACTGCCAGCTTGGCCGGGAGAACAAACA  
 ACCGCCAATATATGTATATGTATATTTATATAGATGTCCAGATGCATTATTGTGAATGTGAG

TTATGCGAAGATACTTGTGGTATAGCTCGTTCAACTCATTGATGGAGAATGGAATGTCAAT  
 ATCGTTTAGTGTGTGTTTCGTAGTTGTATATGCGCTTCTGTTTCATTGATACTAACAGGTT  
 CCATAGATATACTAGGGCTTTGCTCAAGCGGATCGAGGGAAGCCAAATCAAGATTGTCAATG  
 CTGTCGGCCTTAATTTCTCCGTTTTGTCAGAGGTGGCTTCAAACCTCGGCAATGTGGTTGTCAT  
 GTCTACATCCGACGAGCGACCATTTAGGCCAAAAGAACGTCCAGATCTGCAATACCGAGAC  
 CATTGACATGCGCTGCTTCATCATTGCCCCCTCTGTGGCATGACCCTCCCTTTGATTTCCGG  
 CTGCTTTTCTCTTGGTATGA

>YAL012W 1.96 Hot

ATGACTCTACAAGAATCTGATAAATTTGCTACCAAGGCCATTCATGCCGGTGAACATGTGGA  
 CGTTCACGGTTCGGTGATCGAACCATTCTTTGTCCACCCTTTCAAACAATCTTCTCCAG  
 CTAACCCTATCGGTACTTACGAATACTCCAGATCTCAAAATCCTAACAGAGAGAACTTGGAA  
 AGAGCAGTTGCCGCTTTAGAGAACGCTCAATACGGGTTGGCTTTCTCTCTGGTTCTGCCAC  
 CACCGCCACAATCTTGCAATCGCTTCCCTCAGGGCTCCCATGCGGTCTCTATCGGTGATGTGT  
 ACGGTGGTACCCACAGATACTTCACCAAAGTCGCCAACGCTCACGGTGTGGAACCTCCTTC  
 ACTAACGATTTGTTGAACGATCTACCTCAATTGATAAAGGAAAACACCAAATTTGGTCTGGAT  
 CGAAACCCCAACCAACCCAACTTTGAAGGTCACCGACATCCAAAAGGTGGCAGACCTTATCA  
 AGAAGCACGCTGCCGGCCAAGACGTGATCTTGGTTGTGCGACAACACCTTCTTGTCCCCATAT  
 ATCTCCAATCCATTGAACTTCGGTGCAGACATCGTTGTCCACTCCGCTACAAAGTACATCAA  
 CGGTCACTCAGACGTTGTGCTCGGTGTCCTGGCCACTAATAACAAGCCATTGTACGAGCGTC  
 TGCAGTTCTTACAAAACGCCATTGGTGTATCCCATCTCCTTTTCGATGCTTGGTTGACCCAC  
 AGAGGTTTTGAAGACTTTTGCATCTACGTGTGAGACAAGCTGCCCTCAGCGCCAACAAAATCGC  
 TGAATTTCTTGGCAGCAGACAAGGAAAACGTTGTGCGAGTCAACTACCCAGGTTTTGAAGACAC  
 ACCCTAACTACGACGTAGTGTAAAGCAACACCGTGATGCCCTTGGTGGTGGTATGATCTCC  
 TTCAGAATCAAGGGTGGTGTGAAGCTGCTTCCAAGTTTCGCCCTCCTCCACAAGACTGTTTAC  
 ATTGGCCGAATCCCTTGGTGGTATCGAATCTCTATTGGAAGTGCCCGCTGTGATGACCCACG  
 GTGGTATCCCAAAGGAGGCCAGAGAGGCTCTGGTGTGTTTTGACGACTTGGTTAGAATCTCT  
 GTCGGTATTGAAGACACTGACGATCTTTTGAAGACATCAAGCAAGCCTTGAAACAAGCCAC  
 CAACTAA

>YPL266W 1.53 Hot

ATGGGAAAGGCTGCGAAAAGAAGTACTCCGGAGCAACTTCGTCCAAACAAGTCTCTGCCGA  
 GAAACATTTGAGTTCAGTATTTAAATTCACACAGATCTAGGTCAGCATATTTTGA AAAATC  
 CTTTGGTGGCGCAAGGTATTGTTGATAAGGCACAGATTAGACCCTCAGATGTTGTTTTGGAG  
 GTTGGTCTTGGTACAGGTAACCTAACTGTAAGGATCCTCGAACAAGCAAAAAACGTAGTGGC  
 AGTAGAAATGGATCCCAGAATGGCTGCAGAATTAACCTAAGAGGGTACGTGGCACACCTGTGG  
 AGAAAAAGTTAGAAATCATGCTTGGAGATTTTATGAAGACTGAATTACCATACTTTGATATC  
 TGTATTAGTAACACTCCTTACCAGATCTCATCGCCTCTGGTTTTTCAAATTAATTAACCAACC  
 AAGACCACCAAGAGTATCTATTCTTATGTTTCAAAGAGAGTTTGCTTTAAGATTACTGGCAA  
 GACCAGGTGACTCATTATACTGTAGATTATCCGCCAATGTACAAATGTGGGCTAATGTTACA  
 CACATCATGAAAGTGGGTAAGAATAACTTCAGACCGCCACCACAAGTGGAATCCAGCGTTGT  
 TAGACTAGAGATTA AAAATCCAAGACC GCAAGTGGATTACAACGAATGGGATGGTTTGTGTA  
 GAATCGTCTTTGTGAGGAAAAACAGAACGATTTTCAGCTGGCTTCAAATCGACCACCGTGATG  
 GACATTTCTGGAGAAGAATTATAAGACATTTTGGCGATGAACAACGAAATGGTGGATGATAC  
 AAAGGGTTCTATGCACGATGTCGTCAAGGAAAAGATTGACACAGTTCTGAAGGAGACCGACT  
 TAGGCGACAAAAGAGCGGGTAAATGTGATCAAAATGATTTCCCTAAGGCTATTATATGCTTTT  
 CACCAGGTTGGTATCCATTTTTCATGA

>YFR034C 1.95 Hot

ATGGGCCGTACAACCTCTGAGGGAATACACGGTTTTTGTGGACGATCTAGAGCCCAAGAGCAG  
 CATCTTGATAAAGTCGGGAGACTTTATCACCGTAAACACGAAACGGCATGATGGGCGCGAGG  
 ACTTCAACGAGCAAAAACGACGAGCTGAACAGTCAAGAGAACCACAACAGCAGTGAGAATGGG  
 AACGAGAATGAAAATGAACAAGACAGTCTCGCGTTGGACGACCTAGACC GCGCCTTTGAGCT  
 GGTGGAAGGTATGGATATGGACTGGATGATGCCCTCGCATGCGCACCCTCCCGAGCTACAA  
 CTGCTACAATCAAGCCGCGGCTATTATATTCGCCGCTAATACACACGCAAAGTGCGGTCCC  
 GTAACCATTTCCGCCAACTTGGTTCGCTACTGCTACTTCCACCACATCCGCTAACAAAGTCC  
 TAAAAACAAGAGTAATAGTAGTCCGTATTTGAACAAGCGCAGAGGTAAACCCGGGCCGGATT

CGGCCACTTCGCTGTTTGAATGCCCCGACAGCGTTATCCCAACTCCGAAACCGAAACCGAAA  
 CCAAAGCAATATCCGAAAGTTATTTCTGCCGTCGAACAGCACAAGACGCGTATCACCGGTCAC  
 GGCCAAGACCAGCAGCAGCGCAGAAGGCGTGGTCGTAGCAAGTGAGTCTCCTGTAATCGCGC  
 CGCACGGATCGAGCCATTTCGCGTCTGAGTAAGCGACGGTCATCGGGCGCGCTCGTGGAC  
 GATGACAAGCGGAATCACACAAGCATGCAGAGCAAGCACGGCGTAATCGATTAGCGGTTCG  
 GCTGCACGAACTGGCGTCTTTAATCCCCGCGGAGTGGAACAGCAAAATGTGTGCGCCGCGC  
 CGTCCAAAGCGACCACCGTGGAGGCGCCTGCCGGTACATCCGTACCTACAGCAGAACGTG  
 AGCACGTGA

>YNL173C 1.64 Hot

ATGCAATCGAGCTTACCTCAATTTACGTTCAAATGGCCCAAAGGACCCGAAGCAATTAATTTCT  
 GACAGGCACGTTTCGACGACTGGAAAGGTACTTTGCCGATGGTGAAGGACCCAGTGGCGCCT  
 TCGAAATAACGCTGCCAGTAACGTTTGATAGCCCTAGCAGCAAGTTTTATTTCAAGTTTATT  
 GTTGATGGCCAAATGGCTGCCAAGCAAAGACTACAAGGTGAACATCGACGAGGGAGTGGAAAA  
 CAACTTTATTACCGAGGAAGACGTAATAAAGCAACGCGAAAATGGCTCTAGCACGCTGGTAC  
 CTGAAAGTGCCGGATTAGCTGTTTCAAAGAATGCCCTCTTATCGAACCAGAAGCTGAAAAA  
 CGTGCAAAAAAATTAAGAAAGTTCAAGATCAAGAGAGTGATCAAGACAAAATAAACAAACCGG  
 AGAAAGGTCGATATTTTCCCAAGAAGTGGTTGAATTGCCGATAGCGAGGATGAAACCCAGC  
 AGGTGAACAAAACGGGCAAGAATGCGGATGGCTTAAGCGGTACTACAACGATAATTGAGAAT  
 AATGTTGGTGTAACGAGGAAAAAGCAATCAAGCCGTATGAAGAGAATCACCCCAAAGTTAA  
 TCTAGTTAAGAGTGAAGGATATGTTACGGACGGTTTGGGTAAGACGCAATCTTCTGAGTCTA  
 GATTATATGAACTATCGGCCGAAGATCTTGAAAAGGAAGAAGAGGAAGAGGACGAAGATAAA  
 GCGGCGGTAAGGACACCAGTACAAGTGCAGACGCTGAAGCTTCAGAAGATCAAAAATAAGGA  
 ACCATTAAGTAAATCCGCTAAATTTGAAAAACCGGAAGAAAAAGTACCTGTAAGCTCAATTA  
 CAAGCCATGCTAAAGAGACTTCTGTGAAACCAACCGGCAAGGTTGCGACTGAGACTCAAACCT  
 TACGAGACGAAACAGGGCGCTCCTACCGCTGCCGCAAAAAAATCGAAGCTAAGAAAAGCTAC  
 TAGACCTTCGAAACCTAAGGGCAGAAAGAAACACCAAATAAAGGTGTCCAAAAGAACCCTG  
 CTAAGAATGGAGGGTTCTTTAAAAAGTTGGCCAGCTTTTGAAGTGA

>YER119C 1.66 Hot

ATGGTAGCTAGTATTAGATCAGGTGTGCTGACACTTTTACACACGGCGTGCGGTGCTGGTAT  
 CCTGGCCATGCCGTACGCATTCAAGCCGTTTGGATTAATTCCTGGAGTGATAATGATAGTGC  
 TGTGTGGGGCGTGCCTATGCAAAGCTTGTTCATACAAGCTCGTGTAGCTAAATACGTACCA  
 CAGGGGAGGGCCTCGTTCAGTGCTCTGACGCGGTTGATTAACCCAAATCTAGGTATTGTGTT  
 TGACCTAGCGATCGCTATCAAGTGTTTTGGTGTGGGCGTCTCTTATATGATTGTAGTTGGGG  
 ATCTGATGCCCCAAATAATGTCTGTGTGGACCAGAAATGCTTGGCTGTTGAACAGGAACGTG  
 CAAATTTCACTGATCATGCTTTTTTTTTCGTGGCCCCGCTGCTTTTTCTGAAGAAGTTGAATTC  
 GTTGAGGTACGCTTCCATGGTGGCCATCTCTTCTGTAGCGTACTTGTGTGTTTTGGTGTGTT  
 TGCACATATGTAGCACCATCAGATGAGATTCTTCGCTTGAAGGCCGGATCTCCTACCTCCTG  
 CCACCACAATCGCATGATTTGAACGTGCTAAACACTCTTCCAATTTTTGTCTTTGCCTACAC  
 ATGTCACCACAATATGTTTTCAATAATCAATGAGCAGAGGTCAAGCCGGTTCGAGCATGTGA  
 TGAAGATTCCTACTGATAGCAATATCTTTGGCTCTCATCTTATATATTGCGATCGGCTGTGCT  
 GGATACCTGACATTCGGCGACAACATCATTGGAACATTATCATGCTGTACCCGCAAGCGGT  
 CTCGAGCACCATCGGCAGAATAGCGATTGTGTTGTTGGTGATGCTGGCGTTCCTACTACAGT  
 GTCATCCTGCAAGAGCTTCAATCCATCAGATTTTGAACACTTCGCCGAGGAAAATGTAAGT  
 ATAAGTGCTACATCGGCGGATGAACCCACTGTTGCTACCGAAAGTTCTCCGTTGATTTCGCGA  
 CAGTAGCCTTGACCTCAATGAGGTAATTGAAGAAGAATCTATTTATCAGCCTAAGGAGACTC  
 CATTGAGAGGCAAGAGCTTTATTGTTATAACGTGCAGCATTTTAGTTGCATCATATCTTGTG  
 GCCATTTCCGTTTCTCCTTGGCCCGTGTACTGGCCATTGTTGGGGCCACAGGCTCCACTTC  
 TATTTCTTTTCAATCTGCCCGGGCTCTTTGGCTACAAGCTTATAGGAACTGAGCACAAGACAG  
 CCGTGCCATTGACGACAAAGATTTTCAAATACACAGGTCTTCTCTTGTATTATCTGGGGGCTA  
 ATAATCATGATCACCTGCCTGACCGCAGCTTTGAAGCTAAACTAA

>YPR036W 1.82 Hot

ATGGGCGCAACCAAATTTAATGGACAGTACTCATTTCATGAGATCCGTTAGTATAATCCG  
 TTCGAGGTCAGTGGCATGGGACGCCTTAGCCAGATCTGAGGAATTGAGCGAAATTGATGCGT  
 CTACTGCAAAAGCGTTAGAATCCATTCTGGTGAAGAAGAATGGTGACGGTTTATCATCT

TCGAACAATGCACATTCGGGTTCAAAGTGAATGGCAAGACGTTGATACCATTAATTCACCTT  
 ACTTTCCACCTCAGACAACGAAGACTGCAAAAAATCTGTGCAGAACCTAATAGCTGAATTGT  
 TATCGTCTGACAAGTATGGAGACGATACCGTGAAGTTTTTCCAAGAAGACCCCAAGCAATTG  
 GAACAATTATTTGATGTGTCACTCAAGGGAGACTTCCAGACTGTGCTAATCTCTGGGTTCAA  
 CGTGGTCTCACTCTTAGTGCAAAATGGGTTGCACAATGTGAAACTAGTGGAAAAGCTGTTGA  
 AAAACAACAACCTTGATCAATATCTTGCAAAACATTGAGCAGATGGACACTTGTTACGTGTGC  
 ATCAGACTATTGCAAGAAGTGGCCGTGATACCAGAGTATCGTGACGTGATATGGTTGCATGA  
 GAAGAAGTTCATGCCACCTTATCAAGATCCTGCAACGTGCCACGGACTCTCAATTGGCCA  
 CGCGGATAGTTGCAACAAACTCCAACCACCTGGGTATTCAATTGCAGTACCCTCTTTACTA  
 TTGATATGGTTGCTGACCTTTAACCAGTTTTTGCAAACGAGCTAGTCCAGAAATACTTGAG  
 TGATTTCTTGACCTCTTGAAATGGTTAAGATAACCATAAAGGAGAAAAGTGTCCAGATTGT  
 GCATATCCATCATCCTGCAATGTTGCTCCACGCGCGTCAAGCAGCACAAGAAGGTGATTAAG  
 CAACTTTTGTGCTCGGCAACGCGTTGCCACCGTACAGAGCTTGAGCGAAAAGAAAGTATTC  
 CGACGAAGAATTGCGTCAAGACATCAGCAACCTCAAGGAAATCCTAGAAAACGAGTACCAAG  
 AATTGACCTCCTTCGATGAATACGTCGCCGAATTGGACTCCAAGTTGCTGTGCTGGTCTCCA  
 CCACATGTCGACAACGGTTTTCTGGTCCGATAACATTGACGAGTTCAAGAAGGACAACATAAA  
 GATCTTTAGACAATTGATCGAACTCTTGCAAGCAAAGGTCCGTAACGGCGACGTCAACGCGA  
 AACAAAGAAAAGATCATTATCCAAGTCGCCTTGAACGACATCACTCACGTGGTTCGAGCTTCTA  
 CCAGAGAGCATCGACGTTCTCGACAAGACTGGCGGCAAAGCCGACATCATGGAGTTGCTGAA  
 CCATTAGATTCTAGGGTGAATAACGAGGCCCTCAAGGCCACGCAGGCAATCATTGGATATA  
 CCTTCAAATAA

>YPL177C 1.85 Hot

ATGAATTATAACTGCGAAATACAAAACAGGAACAGTAAGAATGTTGACAATCAAGTCAGTCT  
 ACCCCCTATCCAAGTTCTATTTAACTCCATAGAAAACGGAGTATGCCCGAGTTGGCATTTTT  
 CGAACATAGAATACTCGCATGGGAACCTTCGGTCTAGTACCGAGGAACAAAACCTATCCTGCG  
 CCTGTGTTACTTCCACAGCATCATTGATTGCGTATCCCGCAATTAATTTGGCGGTACTAG  
 TACTACTGCTACTCCTACTGCTTCTACAGTTGAAACGTCCAAGACGAGTAGCAGTGTATGG  
 ATACACAATCTCAATATGGCAGTTCAAAGAAGTCAAAATCGGCGTCCGATGATGCAAAGCCC  
 TGCTACAAATCCGCCCAATATATGAAATAATCAATAAGGAAAAGGATGCGGGGCGACAATA  
 CAACAGGCCATTTTCGGATTTTGTAGAATCTAAATCAAGGAGGAAGCAAAATTCGGGCAGGA  
 GGTCTAACCTGCCAAAGGAAACAGTGCAGATACTGAATACTTGGTTGCTGAACCACCTGAAT  
 AACCCCTACCCAACCTCAACAAGAAAAGAGGGAGTTGTTAATCAAAACTGGGCTAACCAAGAT  
 TCAACTTTTCTAATTTGGTTTATAAATGTGAGAAGACGCAAAATATTTAGTGATTACTATACCC  
 TGGTAAACTCAATTCCTAATGACAACGCGAATAATACCCAGTGGAACGAGTTCAAAACGTC  
 TCAGCATATCATAACACATTATCTGCCACAAATAATACTATGTACGATGCTACGTCAACCTG  
 CTCCACGGATTATGAATTATCCAAGAGATTTGCTCATGCCCCGTTACACGCCGTAAAAAAC  
 TAATTGATAGGCTGGAAGAATTGAAAAGCTATCCAACCTGATATGAATTGA

>YJL067W 1.61 Hot

ATGAGTAAAAAAGGAAACGAAAATATGTCCTAATTGCTTTCGTCAACACTCACCCTTTAT  
 GCTTCACCTGGGGACTGGAACCTTGGAGGTAGTGGTGGTAGTAATGTCTACCGTGCCATCG  
 TCAAAGTAGATTTTTTTCAGTTTTGACGGTGTGGGTTTTGCATCATTGGAATCCTTCGTGGT  
 ACTAATGGACTGTGCCCTTCCAACAATTTTCTGGATCCATCTGCAGAAGCATATTCAGCAT  
 CGTTGCCAGATGCAAGTCTCCAATTCACATGAGGTCTTCTGGAGTCTTAGCCAGAGGC  
 TCTACGGCAGTGCTCCTAGTCTTGATTCTTTGTTTTTGTAG

>YIL108W 1.62 Hot

ATGGTAGGCTCGAAGGATATTGATCTATTCAACCTGAGAGAGAACGAGCAAATCGTTTCTCC  
 TTGCTTATCGTGCACGGAAAATGCAATAAGCAAAATGGTGCAGAACCGTTCAAGTGCAGC  
 ATCCACAATTGCCTCCAATTACTTACCCATACATAATCAGTTCTTCAAGGCCACTGTGATA  
 TTGACTCCTGGTGAGAACAAGTTGACCTTTGTTACAGACACTAACACCGCTAGGACAATCGT  
 ATGTTACTACACCACTGACGCAGAACCCTCCCGTACACCTGTGTCTGATCTTGCCAAGG  
 ATTCGCCTTTACAGTTTACTCTCCTCGAGAACAGAAGGACAGAGAGGGCGGGAATGGCCTC  
 GAATTGGCAATCAAGAAGCTAAGACTTGGGGCCAGACTCATGCAAGCGTACACGAACGAGCA  
 AATGCTGAGAAAACAGTATGGGAAATAGGACGTTTCCCTTTGTTGAAGAAATTTACCTGGGACA  
 CGCTGTTCAACGGCCTGCTATGAGAAAACACCATCAAAATACATGTAGTTCGTTCCGAAAAG

ACGGTGAAGGAAATCCAGGACCCTGACATAGCTCAACAGAATTCCAAAGGGAAAAACACCGG  
CGCCCTTTTTGGGATAGCCATGGACGCCCTTAAAAGTTACGGCGGACCCTTCACCAATAACG  
AAAAGCCTGTTTCAGGCAGCTTGTATGTTTCTAGACACCCACTGGGATGGTAAGTTGATTAGA  
GGCCACGCCGCATTTGGGTGGGGGTGACGACAGCATTAAAGCTCGCCATTTTTGGGTGCGACGG  
GCTTTACTCATGGCCTACTTGTCTCGAGCAATTGGTGCCTTATTTTACTGATGAGACAAGAT  
CCTCCACCAGTGAAGTCGCCAACGACTGTAATGAGTGTGGTACTTACTGGGAATGTTGACT  
ATCACGTTGGGAGCATTTATGCATGAGATTGGTCACTTACTGGGTTGTCCATCAGGAAAG  
CGGTGTTATGCTAAGAGGCTATAACCACTTTGAATAGGTCTTCTTACTAAAGAGGCTTATT  
CTGTAAGAATAATTCAACTGGTGCTAGTCCCTCCCATCTTCCCAAGGAAGAATGTACCTGG  
AACCGTCTCGATACGGTAAGATTTTTGTACCACCCCTCTTCACTTTACCACAGGATTATTA  
CGATCCATCGTTCATGAGACCTACAAAATTGGGCGGATACCCCAATATAAAAACACTCTGTAT  
ATCCTTTGGGTAACGGCAGTTGCCGCATATTATCGCCACAGGAATCTATTTGATTGAAATT  
ATATGTGATGATTTGGCCAGGGGCCATATTGAATACTTGCCGGTTTCCCTAGGTGGACAGGG  
GCCTCAACGGGAAGTTATAGTAACATTAGATGATTTACGTGCCAGGTTGCCAAGAATGAAC  
TCGCCAAGTTTGGCAATACCTTCAAATTTGAAAATTTCTTTCTGTTAATGCACCGGAAACCGAG  
TTCGACAAGTTCCCATCTTTGTTAGATGTTTACGCCATTAGACATGTCGAAATATGGGTTTTTC  
TAAAAATGTTCAAGGTATCAAATCACCCTTTATGGTTCGACGCGACGGTGGTAATGCTGTCG  
GCGTCGTCGCTTTTGATGTTAGATTAGTCACTGCTGTGAGAATATAACCATGGCTATGCATTA  
GATGGTGTGAGGTTTTATTACAAGGAAAAACCAACTGGAACAAAGGATGCTCCCGCATCCAA  
GCCCTCTGTACCACCAAGAAAATTTTTCTCAAAAATTACACATAGTATCAAAAATCATGCTT  
CAATAAACGAAGAAAATCTAAAAAGTGTACTCTTTGGACATGAAACACAAAATTTTACGGAT  
GCTACACTAGAACCGGGTGAAAATAATCATTGGGTTTAAATCTGAGGTGCGGAGCTTGGGTTGA  
TGCTATCCAAATTATAACGAGTCATGGGAGAATGACCGACATGTTTGGTAACAAAGACGGAG  
GTGGGTTTCGCTGAATTGCAGCCACCTAATGGCCAATATATCCTAGGTGTGACTGGCAGAGTC  
GGTCAATGGGTCGACGCCTTCGGAATTATTTACGGAGCTTTATAG

>YHR218W 1.87 Hot

ATGGATAGGAAAAGGTCTTTTTGAAAAAATTGTCGTTTTCCGTCATGGTTCGGGAAAAATGTACA  
AAAGTTCCCTGACGTTTTGTTGAAGACGAACCAGATTTCCAGGCGGACCAATCCCTTCAAAGT  
ATCTTATTTCCCAAGAAAATCAACTTGATGGTCTACACGTTGTTTTCAAGTGCATACTTTGAAA  
TTCAATAGAAAGGATTACGATACCCTTTTCTCTTTTTTTACCTCAACAGAGGATACTATAATGA  
GTTGAGTTTTCCGTGTCCTGGAACGTTGTTACGAAATAGCGAGTGCCAGGCCGAACGCACAGCT  
CTACGATGCGTACTTTCACTGACTTTGTTTCTGGCACACCTATTGTAAGGAGTCTTCAGAAA  
AGCACCATAAGGAAAATATGGATACAATTTGGCACCCCTACATGTTCTTGTACTACACGTAGA  
TGAGCTATCGATTTTTTTCTGCATACCAAGCAAGTTTACCTGGCGAAAAGAAAGTCGACACAG  
AGCGGCTGAAGCGTGATCTATGCCACGTAACCCACTGAGATAAAGTACTTTTTACAGATA  
TGTAACGATATGATGAACAAAAAGGACCGATTGGGTGATGTTTTAGCTACAGCGCAACGTAT  
ACGTCGACGATACAACAAGAACGGTTCATCGGAGCCTCGACTAAAGACGCTTGACGGACTCA  
CTTCCGAGCGCTGGATTCAATGTTAGGCCCTTGAAGCGACTACCATTGTTCAATTCTCTAGT  
ACTCGGAATGCGGAAGACGTAGTGGCAGGTGAGGCGGCGAGTTCAGATCATGATCAAAAAAT  
TTCAAGAGTAACGCGAAAAAGGCCCGAGAGCCCAAGAGTACAACGATATCCTCGTCGCAG  
GCCGAAACTCTTTGGCAGCTCCTTTGAATTCAGGGACTTGCATCAGTTGCGCTTATGTCAT  
GAAATATACATGGCAGACACACCCTCTGTGGCAGTACAGGCCCCACCGGGCTATGGTAAGAC  
GGAGTTATTTTCACTCTCCCTTGATAGCACTGGCATCTAAGGGCGACGTGAAATATGTGTCGT  
TTCTGTTTGTACCGTACACAGTGTGCTTGTCTAATTGCATGATCAGGTTGGGCCGACGCGGT  
TGCTTGAATGTGGCCCCGTGAAGAACTTTATGAAGAAGGTTGCGATGGCGTTACTGATTT  
ATACGTGGGGATCTACGATGATCTTGCTAGCACTAATTTACAGACAGGATAGCTGCGTGGG  
AGAATATTGTTGAGTGCACCTTTAGGACCAACAACGTAATAATTTGGGTTACCTCATTGTAGAT  
GAGTTTCACAACCTTTGAAACGGAGGTCTACCGGCAGTCGCAATTTGGGGGCATAACTAACCT  
TGATTTTGACGCTTTTGAGAAAGCAATCTTTTTGAGCGGCACAGCCCCGAGGCTGTTGCTG  
ATGCTGCGTTGCAGCGTATTGGGCTTACGGGACTGGCCAAGAAGTCGATGGACATCAACGAG  
CTCAAACGGTCGGAAGATCTCAGCAGAGGTCTATCCAGCTATCCAACACGGATGTTTAACT  
AATCAAGGAGAAAATCCGAGGTGCCTTTAGGGCATGTTTCAATAAATTTGGAAGAAAGTGGAAT  
CACAGCCCCGAAGAAGCACTGAAGCTTCTTTTAGCCCTCTTTGAAATTGAACCAGAGTCGAAG  
GCCATTGTAGTTGCAAGCACAACCAACGAAGTGAAGAATTTGGCCTGCTCTTGGAGAAAAGTA  
TTTTAGGGTGGTATGGATACACGGGAAGCTTGGGTGCTGCAGAAAAGGTGTCTCGCACAAG  
GAGTTTGTCACTGA

>YGR207C 1.51 Hot

ATGTCCTGCAAAACAGCAACTACGTATATTAGTTCCGGTGAAAAGGGTAGTTGATTTCCAGAT  
 CAAGCCTAGAGTAAATAAGACCTTAACTGGGATTGAAACCAGTGGAATCAAATTCAGTATCA  
 ACCCTTTCGATGATATTGCTGTCGAAGAAGCCATCAGAATTAAGAAAAGAACAAGAGTTTA  
 GTAGAATCTACGCATGCAGTTTCTATTGGCTCCGCCAAAGCTCAGGATATTCTAAGAAATTG  
 CCTTGCTAAGGGAATAGACACCTGTAGTTTAATTGACTCTGTGGGTAAAGAAAACATAGAGC  
 CCTTAGCAATTGCTAAAATCTTAAAAGCTGTTGTTGAAAAGAAGGGTTCTAATCTGGTTTTG  
 ATGGGAAAGCAAGCCATTGATGATGACTGTAACAACACCGGTCAGATGTTGGCAGGTTTATT  
 AAAATGGCCACAGGCAACAAATGCGGCAAAGGTGGAATTCCTTGATAATGGTAGAGTTCAGG  
 TAACAAGAGAAAATTGACGATGGAGAAGAAGTAATTGAAGCTTCCTTACCAATGGTTATTACT  
 ACAGATTTGAGATTGAACACTCCGCGTTACGTAGGACTGCCCAAATAATGAAGGCGAAGAA  
 AAAGCCTATTGAAAAATTGGATATAGCAAAAAGATTTTCTGAAATTAATATTGAACCTCAGT  
 TAAAGATAGTGTGATGGAAGAGCCAAAGACTAAGTCACCTGGTGTGAAAATTGAATCTGTG  
 GATGAATTGATTGAAAAGTTAAAAGAAGTTAAGGCCATTTAA

>YOR334W 1.52 Hot

ATGAATCGGGCTCTCCTGGTACGTTCTATATCTTGTTCCTTCCAACTTTGTCGAGAATAACTTT  
 TGGAAGACCAAACACGCCATTTCTTAGAAAAGTATGCTGACACATCCACTGCTGCAAAACCA  
 ACAGCACCATATTGCGGAAACAGTTACTATCGTTGAAGCCCATTTCTGCCCTCTGATTCACTG  
 TTCATTTTCGTGTACGGTATTCAATTCTAAGGGAAATATTATCTCAATGTCGAGAAGTTTCC  
 TAAATGGTCTTTTTTAACTGAACATTCCTTTTTCCCCAGAGACCTGAGGAAAATAGATAACT  
 CCTCTATTGATATTATTCCAACCATCATGTGTAAGCCAAACTGTATTGTCATCAACTTATTG  
 CATATCAAAGCTCTTATCGAACGAGATAAGGTCTACGTCTTCGATACAACAAACCCTTCGCG  
 CGCTGCCAAACTGAGTGTACTTATGTATGACTTGGAGTCTAAGTTGTCTCCACCAAGAATA  
 ACTCTCAATTTTACGAGCATAGAGCCCTCGAGAGTATTTTCATCAACGTAATGAGCGCACTG  
 GAAACAGATTTCAAGCTTCACTCACAAATCTGTATTCAAATCTTAAATGATCTGGAAAACGA  
 GGTCAATAGACTTAAACTGCGGCATCTTTTTAATTAAGTCCAAAGATCTTACGCTTTTTTACC  
 AAAAACTTTTATTGATTAGAGATCTATTAGATGAACTATTAGAAAACGACGATGATTTAGCA  
 AACATGTACTTACAGTTAAGAAGTCTCCTAAGGACAATTTTTCGGACTTGGAATGCTTAT  
 AGAGACGTACTACCCCAATGTGATGAATACGTTTCAGCAATCAGAATCTTTGATTCAGGATA  
 TCAAATCTACTGAAGAAATTGTCAACATCATATTGGACGCAAATAGAAATTCCTTAATGTTG  
 TTGGAGTTGAAAGTTACCATCTACACGTTGGGATTACAGTAGCATCTGTTCTGCCGGCATT  
 CTATGGTATGAATTTAAGAATTTTCATCGAGGAGAGTGAATGGGGGTTTACTTCAGTGGCGG  
 TATTTTCTATTGTTTCTGCCCTTTATATCACCAAGAAAAATTTTAATCTTTAAGATCCGTG  
 ACAAAGATGACCATGTATCCAAACTCACCCGCAAACCTCCAGTGTGTATCCTAAAACATCAGC  
 GTCTATTGCCCTGACAAATAAACATAAGCGAAGGCGGAAGTGGTGGAAATCAACCAAGCAGC  
 GGTGGGAGTGTACTTTTATGGCAGCAGCTACACTAATAAGGCTAACCTGTCGAATAATAAG  
 ATTAATAAAGGTTTTTCAAAGGTGAAGAAATTTAACATGGAGAATGATATTAAGAACAAGCA  
 GAACAGAGATATGATTTGGAATGGTTGATAGAAGACAAGAAAAATTGA

>YIL045W 1.56 Hot

ATGGCCACCACGCAACCACAAAATATACTGATGGATGAACCTTTAAATCTTCCCTAATAA  
 CAGTGCCCAACAATAACTATGGAAACATAAATGCGAATAAAGAATTTTGCTGGTATGA  
 GCATGCACATGCACCCTGCCAGGCTGAACTCTCTGGAGTTTTTGCACAAGCCCAGGAGACTA  
 TCTAATGTAAAACCTGCACAGATTACCTCAGGACGAGCTTCAAAGAAATACGGACATGAATAA  
 GGAATGTATTTAATGGGAAACAAGTTCATGCCATCACCCGTTTATAAATCTGGAGCGA  
 ACTTTAACGCACATCATCAAGACGTCAGTAAATTAGGCGAGGAGGAAGACGAAATCTCTCCT  
 CTATCACATGATAATTTCCAGTATGAATCCGAGGAAAATGGTAATCCTTACCTCCCATTTA  
 CAAGAAATCTGGAGAACTGGTTAAGAGTTCATTA AAAAAGAAGATCCAAGTCCCTACCCATTA  
 CTCCCAAATCTATATTCAACAAAACCTGGCTCTAAGAGTAAACATGTCAATTTAGATCATGTA  
 GATACTAGGCTATTGCAAAGAAGTAAAAGTGTCCATTTTCGATCGTGTTTTACCAATAAAGCT  
 GTTCAATGAAAATGAGAAACCCATAGATGTTGGCAAACAAATGGTTCAACAAGATGTTCTGA  
 ATTTCAAGCATAAGCCTTTGACGAGACTAAGTGCCCTTAATGGCGGTAGTGATAGCGTACCT  
 ATAGAAGATTTACTATCTGAAAACAACCAAAAACGAATATGGAGATACATGGCTACAAAACCC  
 GAAGGGTGTATTCCTATTTGGTACAAATTTAATAATCGTAGAAATAAAAAAAGAAGTTTA  
 AACTAAGTGACGATGACAGTGATATTGAAAATGACAATGATAGTGACGACGCTATAAACCGT



TTAGTAAGGCAACAAGACAAAGACCAAGCTCATCTTGCGCACGGGTTGAAGAATTTGTTAAT  
 AAACGATGACGACGATTATTTAGAAACAAGAACAATTTCTGCTAAATCAGGAGCCAACTTGT  
 TTATTGGAAACTCTAAAAGAATTGTTGGTCTTTACAACAAGAACTTTCCAATATTAAGTGAC  
 AGGAACCGTAAGAGTTTAAAACCTTAACATATTTCTGAATCTTTCCCGTGGAAGGCCGTTTT  
 TTTGCAAGAAATTACGCTACTAACTGGCTTCCACAACATGGTTATAATTGGCAAAGTCTTTG  
 TGAAAAACATATACTTTGATAAGAAGATTATCGTAAGATATACATGGGATGCATGGAGA  
 ACTTTTCATGAATCAGAATGCGTGTATTTTTCTAATGCCAATGGCATCTTACCAGGAAGCAATAT  
 GGATATTTTTAAGTTCTCCATGATGATATACACAATCCAAATGATAAAGATAGCAATATAT  
 CACAATTGGAGTTTGTATTCAATACTTAACTTGGGGCGTTGATCGTTCTAGGAAGGAATAT  
 TGGGACAATAATGATTTCGGCAAACATAAAAATTGACGTGGTAACGAATGAAACGAGGACAGG  
 GCCACAACAGACGTCAATGATAACTACGAGATGAAACATAGTCTTTTCAGAAACCCATTC  
 ATTAA

>YCR052W 1.61 Hot

ATGGTAACACAGACCAATCCGGTCCCTGTTACATATCCAACGGATGCTTATATCCCCACGTA  
 TCTGCCCGATGATAAGGTCTCCAATCTGGCAGATTTGAAAAAATTGATAGAAATGGATTCCA  
 GACTAGATTTGTATCTGACAAGAAGGAGGCTGGATACGTCCATCAATTTACCTACAAACACC  
 AAGACCAAGGACCATCCCCCAATAAAGAGATGCTGAGGATTTACGTCTACAACACTACGGA  
 AAGCAGCCCTCGCAGCGATTCTGGCACCCCAGCGGACTCAGGCAAGACTACATGGACACTGA  
 GAATAGAAGGTAAGCTTCTGCACGAGTCCGCAAACGAAAGCACCCATTTAGTGAGTTTTTTG  
 GAAGGTGTGCGGGTGCAGCTTTAAAAGACTGAAACCGCTGGGCATGGGCAAGAAGAGGAAACG  
 CGATTCGTCATTGAGCCTTCTTTGAATCTGCAACAACCCGAATACAATGATCAAGATAGCA  
 CCATGGGCGATAACGACAACGGCGAGGATGAGGACAGTGCAGAGGCAGAATCCAGGGAGGAA  
 ATTTGTAGACGCACTGGAATGGAACCTACGATGAAAACAACGTTGTGGAGTTTGTATGGTATCGA  
 CATCAAGAGGCAAGGCAAGGATAATTTGCGATGCAGTATAACCATCCAGTTGAGGGGTGTCG  
 ACGGTGAAAAAGTACAGTACTCGCCCAACTTAGCTACCTTGATAGGTATGCAAACGGGCTCC  
 GTTAATGACGCGGTTTTATTTCGATCTACAAGTACATTTTGTATCAACAATCTGTTTGTACGGA  
 ACAACAGAGGCTCAAGATGGTTCCAACGATGCCGAAGACAGCAGTAACGAGAATAACAATA  
 AAAACGGTGTGTTGACGATGATGGCGTCGAGGGAAGTACTCCAAAGGATAAGCCCGAATTG  
 GGTGAAGTGAAGCTAGATTCACTCTTACAAAAGGTATTGGATACAAACGCCGCGCACCTCCC  
 CTTGATGAATGTTGTGCAAACCGTGAACAACTGGTATCACCCCTACCGCCCATCATCCTAG  
 ATTATACAATTGATCTTTCCAAGATAACCCTATGGTGCTACCACCTTGGATGTAGATGTG  
 TCGCACATTCTCCACCAGCCTCAACCCAGCCAAATTTACAAAAGAGGAAGAAACAGATGC  
 TGAAGACACAGCAAAACTACGTGAAATCACAAAGCTTGCCCTTGCAGTTGAACTCTAGTGCTC  
 AAAAATACCAGTTTTTCCACGAAGTGTCTTTGCATCCAAGAGAAACGCTGACTCACTACTTA  
 TGGTCTTCCAAGCAAACGAGCTTGTGCTGCAGGGCGACCAATACTTCAATGAAGATGCTGC  
 AAGAACGAGTGACATATACAGTAACAACAACATGACAGGTCCTAATGGGCAATATCTCAC  
 TACTGTACTCCCAAGGAAGACTATAA

>YCL029C 1.72 Hot

ATGGATAGATATCAAAGAAAGATAGGATGTTTTCATACAAATCCCAAATTTGGGGCGCGGACA  
 ACTGAAATACGTGGGTCCAGTGGACACGAAAGCTGGAATGTTTGCTGGTGTAGACTTACTTG  
 CCAACATTGGTAAGAACGATGGATCATTTCATGGGGAAGAAGTATTTTCAAACGGAGTATCCT  
 CAAAGTGGACTATTTATTTCAGTTGCAAAAAGTTCGATCATTTGATCGAGAAGGCATCGATATC  
 GCAAACCTCGAGAAGAACGACAATGGAACCGCTATCAATACCCAAAAACAGATCTATTGTGA  
 GGCTACTAACCAGTTCTCTCCCATGGATGATCCTAAATCCCCACACCCATGAGAAGTTTC  
 CGGATCACCAGTCGGCACAGCGGTAATCAACAGTTCGATGGACCAGGAGGCATCGGATCACC  
 TCAACAGCAAGAATTTGGTTACGATAACAGAGAAGACAGAATGGAGGTCGACTCTATCCTGT  
 CATCAGACAGAAAGGCTAATCACAAACACCAGCGATTGGAAACCGGACAATGGCCACATG  
 AATGACCTCAATAGCAGCGAAGTTACAATTGAATTACGAGAAGCCCAATTGACCATCGAAAA  
 GCTACAAAGGAAACAACACTACACTACAAAAGGCTACTCGATGACCAAAGAATGGTCTCTGAAG  
 AAGTGCAACCGACTTTTGTAGGTATGAAGCCACAATACAAGAAAGAGAGAAAGAGATAGAC  
 CATCTCAAGCAACAATTTGGAGCTCGAACGCAGACAGCAAGCCAAACAAAAGCAGTTTTTTGA  
 CGCTGAGAATGAACAGCTACTTGTGCTGTAAGCCAACTACACGAAGAGATCAAAGAAAACG  
 AAGAGAGAAATCTTCTCATAATCAACCCACTGGTGCCAACGAAGATGTCGAACTCCTGAAA  
 AAACAGCTGGAACAATTACGCAACATAGAAGACCAATTTGAGTTACACAAGACAAAGTGGGC  
 TAAAGAACGCGAACAATTGAAAATGCATAACGATTCGCTCAGTAAAGAATACCAAAATTTGA

GCAAGGAACTATTTTTGACAAAACCACAAGATTCCTCATCGGAAGAGGTGGCATCCTTAACG  
 AAAAACTTGAAGAGGCTAATGAAAAATCAAACAGTTGGAACAGGCTCAAGCACAAACAGC  
 CGTGGAAATCGTTGCCAATTTTCGACCCCCCTGCACCAGTCGATACCACGGCAGGAAGACAAC  
 AGTGGTGTGAGCATTGCGATACGATGGGTCATAATACAGCAGAATGCCCCATCACAATCCT  
 GACAACCAGCAGTTCTTCTAG

>YOR176W 1.6 Hot

ATGCTTTCCAGAACAATCCGTACACAAGGTTCCCTTCCTAAGAAGATCACAACCTGACCATTAC  
 AAGATCATTTCGGTTACATTCAACATGCAGAATGCACAAAAGAGATCACCCACAGGAATTG  
 TTTTGATGAACATGGGTGGCCCCCTCTAAAGTTGAGGAAACATATGATTTTTTTGTATCAATTA  
 TTTGCCGATAATGACCTAATTCCCATTAGTGCTAAGTATCAGAAGACAATTGCTAAATATAT  
 TGCTAAGTTTTCGTACCCCCAAGATAGAGAAGCAATATAGGGAAATTGGTGGGGGCTCCCCAA  
 TCCGGAATGGTCTGAGTATCAAGCCACTGAGGTCTGTAAAATCTTAGATAAAAACCTGTCCA  
 GAAACGGCGCCTCATAAGCCTTACGTGGCGTTTCGTTACGCAAAGCCGCTAACCAGGAAAC  
 TTATAAACAAATGCTAAAAGATGGCGTGAAGAAGGCAGTGGCCTTTTCTCAATATCCTCATT  
 TCTCTTATTCCACTACCGGGTCATCCATCAACGAATTGTGGAGACAGATTAAGGCATTGGAC  
 TCCGAGAGATCTATATCTTGGTCGGTTATTGATCGTTGGCCTACAAATGAAGGTCTAATCAA  
 GGCTTCTCCGAAAATATCACCAAAAAACTACAAGAGTTTCGCAACCTGTCAGAGACAAGG  
 TTGTTTTATTGTTTTCCGCACATTCTCTACCCATGGATGTTGTTAACACCGGTGATGCCCTAC  
 CCAGCTGAGGTAGCTGCGACGGTTTTACAACATCATGCAAAAATTAAGTTTAAAAACCCCTTA  
 TAGGTTGGTTTTGGCAATCCCAAGTTGGACCAAAACCATGGTTGGGAGCGCAGACAGCTGAAA  
 TTGCGGAATTTTTAGGCCCCAAAGTTGATGGCCTAATGTTTTATTCCCTATCGCCTTTACCTCT  
 GATCATATTGAAACATTGCATGAAATTGACTTAGGCGTCATTGGGGAATCGGAATATAAGGA  
 TAAATTTAAGAGATGCGAATCTTTAAATGGCAACCAGACCTTTATTGAAGGCATGGCAGATC  
 TCGTCAAAGCCACTTACAGAGTAACCAACTCTATTCTAATCAACTACCTTTGATTTTTGCA  
 CTTGGCAAGTCCAATGATCCTGTAAAGGACCTTTCATTGGTATTTGGCAATCACGAATCTAC  
 TTGA

>YCL040W 1.75 Hot

ATGTCATTTCGACGACTTACACAAAGCCACTGAGAGAGCGGTCATCCAGGCCGTGGACCAGAT  
 CTGCGACGATTTTCGAGGTTACCCCCGAGAAGCTGGACGAATTAAGTCTTACTTCATCGAAC  
 AAATGGAAAAAGGTTCTAGCTCCACCAAAGGAAGGCCACACATTGGCCTCGGACAAAGGTTCTT  
 CCTATGATTCGGCGTTCGTCACCGGGTCACCAACGGGACGGAGCGCGGTGTTTTACTAGC  
 CGCCGACCTGGGTGGTACCAATTTCCGTATATGTTCTGTAACTTGCATGGAGATCATACTT  
 TCTCCATGGAGCAAATGAAGTCCAAGATTCCCGATGATTTGCTAGACGATGAGAACGTCACA  
 TCTGACGACCTGTTTGGGTTTCTAGCACGTCGTACACTGGCCTTTATGAAGAAGTATCACCC  
 GGACGAGTTGGCCAAGGGTAAAGACGCCAAGCCATGAAACTGGGGTTCACCTTCTCATAACC  
 CTGTAGACCAGACCTCTCTAAACTCCGGGACATTGATCCGTTGGACCAAGGGTTTTCCGCATC  
 GCGGACACCGTCGAAAGGATGTCGTGCAATTGTACCAGGAGCAATTAAGCGCTCAGGGTAT  
 GCCTATGATCAAGGTTGTTGCATTAACCAACGACACCGTCGGAACGTACCTATCGCATTGCT  
 ACACGTCCGATAACACGGACTCAATGACGTCCGGAGAAAATCTCGGAGCCGGTCATCGGATGT  
 ATTTTCGGTACCGGTACCAATGGGTGCTATATGGAGGAGATCAACAAGATCACGAAGTTGCC  
 ACAGGAGTTGCGTGACAAGTTGATAAAGGAGGGTAAGACACACATGATCATCAATGTCGAAT  
 GGGGTCCCTTCGATAATGAGCTCAAGCACTTGCCTACTACTAAGTATGACGTCGTAATTGAC  
 CAGAACTGTCAACGAACCCGGGATTTCACTTGTGTTTTGAAAAACGTGTCTCAGGGATGTTCTT  
 GGGTGAGGTGTTGCGTAACATTTTAGTGGACTTGCCTCGCAAGGCTTGCCTTTTGAACAGT  
 ACAGGTTCAAGGAACAACCTTCCTCGCCACTTGACTACACCTTTCCAGTTGTCATCCGAAGTG  
 CTGTGCGATATTGAAATTGACGACTCGACAGGTCACGTGAAACAGAGTTGTCATTATTACA  
 GAGTCTCAGACTGCCCAACTCCAACAGAGCGTGTTCAAATTTAAAAATTTGGTGCAGCGCA  
 TTTCTAGGAGATCTGCGTATTTAGCCGCCGTGCCGCTTGCCGCGATATTGATCAAGACAAAT  
 GCTTTGAACAAGAGATATCATGGTGAAGTCGAGATCGGTTGTGATGGTTCCGTTGTGGAATA  
 CTACCCCGGTTTTAGATCTATGCTGAGACACGCCTTAGCCTTGTACCCCTGGGTGCCGAGG  
 GTGAGAGGAAGGTGCACTTGAAGATTGCAAGGATGGTTCCGGAGTGGGTGCCGCCTTGTGT  
 CGCCTTGTAGCATGA

>YIL056W 1.86 Hot

ATGAACGGTCCTCCAACATTCACCTCAATATAGAATAAATAAGTTTTCTGGAATGGAGCAAC  
 TCATAAGATTAGAGAATTACTCAATTTTAATGATGAAAAGAAATGGAAACAGTTTTTCGAGCA  
 GAAGGCTGGAGCTGATAGACAAATCCAACCTAAGTCAATATAAGGCAAGCGAACAAAGATCAA  
 AACATAAAGCAGATTGCTACAATATTAAGAACGGAGTTTGGATACCCTGTAAGCTGCTCTAA  
 GGAATTCGAAAAGTTAGTCACTGCTGCTGTGCAATCAGTGAGAAGGAATAGAAAACGATCAA  
 AAAAACGCTACGCTCTCAGCATAGCCAATGGCAGTGGCGCAATGTCAACAACAGCATCTCG  
 TCAAATTTCTACTTCTGACGACGAGATCTCTCCGTCGATCTACCAGCGCTCCAATTCGGACTT  
 CCTGCCTAGTTCTAATTATGCTGCAGATTTCCAGTTTTCAAACAAGTTCAGCCTCTCATGA  
 GTCACCAGAGTCATAACGGAACCATTTTTCCAACCGTGGGCACCCAAAATGACTCATCTCCA  
 TCGGTTACTTCGACCCAAACAAAAGTATAACGATATAGTCACCATGCTAGTGCACGATCTTGT  
 TACGAATGTGCTACCCCTATCAGAACAAGCTCTCAAGGACCCATATACTGGGCCAAACCTGT  
 CACATTTTGTACGTCTTCACTCAGCCAGCAACCTAACATTACCACAAAACATCCCAGATAGAT  
 TCTACCGTGCCATTTTTCTGAGGGAAAAGTTACTCCTACAAATCCAAAAGATCAAGAACTTG  
 TCAGGACATTTTCGAGGCTGCAGGATCCATTGATATATACGCAAATCTGGAGATTTTGGGTG  
 AAAATGTCAATCCGAATGTCTATTGCATTCGTTATCGAACGATTTTTCTCCAACCTGGTCTCT  
 TCTTCAATGAAGTATATCACTGCCAAGACGTGCTCTCCTGAAAATCTGGCTTTGTTGTCTCA  
 AAGACTGTTTCGGTGCCGCTACAAGACATAACTTATCTCATTTCCCGCGGCTCAGGTACAAC  
 TAAGGCTACTGTATTTGGTTCATAGGTGGTATTGTCAAGGATTTTGGCTTCGACCCACGCTT  
 TACCCTTTAAGTGAATCATAACATCATATTGTGATGGTTCAGTATCCTTTGGCTAGTTCCCTG  
 TGCGTCAGAACCACCATCATCTTACCTAACAAAGAGGGTTAAGAGAAGCCCTCCTGTCTGTTT  
 CAAGTGACGTTATGTTGAATAATAATAACACTCTATCGAATAGAGCTACACTTTTAACTACG  
 CTACCAATGAAGCCTCAATCGGCCAATAAAGATGTTAATCGCAGAGTGATCATTAGATTTAA  
 TGATCGCGAGCAAGCCTTTACTTTCCACCAGTTGAGCAATGGACCACCCACGGTGTCTGAAG  
 TTTTGGAAAACGTGAAAAATTTATTTAATATTATCAACAAGAACAAGAAATTTTGGTATTTTC  
 CATAACGATAACCTCTTGAACGATGAAAGTTTGGCAAAGTTATTTGATTCCTTTTCCACGAG  
 CGAGATTCATCTCGTAATTAAGGACATTTCCACCATTCCACTACAAGATGCAAAAATACCAG  
 TGCCCATTACGTTGCCCAAAATGTCATGCATAGGTGAAAACCCCTCTATGCCTTCTATTCCA  
 TTGGTACCACAAGAAAAGATGATCCAAAAAATCAAGCTTAACTGCCTTTGATAACATCCT  
 TAATAGGATCTCTAAATCGCCAATGAATGAAGAAAATAGCAACACTACTTTAAACACTGGCA  
 CCTCCACCTCCAACACAAATAATAATGACCACAACGAGTCTGTGCCAGCGCCATACGTTACA  
 AAGAACAAAATTCCTTTTCAAATGGCAATTTACCACAGCCGGTTTTCCAGCCTTTACTTTG  
 A

>YCR047C 1.76 Hot

ATGTCACGTCCTGAGGAGTTGGCACCACCGGAGATTTTCTATAATGATAGCGAAGCACACAA  
 GTACACGGGTTTCGACCAGAGTGCAGCATATCCAGGCGAAGATGACGCTGAGGGCGTTGGAGC  
 TTTTGAATCTGCAGCCGTGCAGTTTTCATTCTGGATATCGGGTGCGGGTCCGGACTGTCTGGG  
 GAGATTTTGCAGCAGGAGGGAGACCATGTGTGGTGTGGTTTGGATATATCGCCAGCATGCT  
 TGCGACCGGTCTTAGTAGAGAGCTGGAGGGCGACTTGATGTTGCAGGATATGGGCACCGGGA  
 TACCGTTCCGGGCGGGCTCGTTTGACGCGGCTATTAGTATCAGTGCATCCAATGGCTGTGC  
 AATGCGGACACTTCATAACAACGATCCATAACAGCGGTTGATGAGGTTTTTCAACACATTGTA  
 TGCTGCACTGAAGAAGGGAGGGAAAATTTGTGGCCAGTTCTACCCGAAAACGACGACCAGG  
 TGGACGACATACTGCAGTCTGCCAAGGTGGCAGGGTTCAGTGGCGGGCTTGTGGTGGACGAC  
 CCAGAGTCTAAAAAGAATAAGAAGTACTACCTTGTGTTGAGCAGTGGGGCCCCACCGCAGGG  
 GGAGGAGCAGGTGAATTTGGACGGTGTGACCATGGACGAGGAGAACGTCAACTTGAAGAAAC  
 AACTGCGCCAGCGCTTGAAGGGAGGCAAAGACAAGGAGTCTGCCAAGAGTTTCATTCTAAGA  
 AAGAAGGAGCTCATGAAAAGACGTGGGAGGAAAGTTGCGAAGGACTCCAAGTTCACCGGGAG  
 GAAAAGAAGACACAGGTTCTAG

>YOR268C 1.79 Hot

ATGGTTTTTGTTTTCCCCTTCCATTTTTTTCTTATGGTTTTTCCAGTTTTCTAGAAGCCGG  
 AAAAAAGGCAAGCTACAAAATGTACTACGCGGAGCCAGAATTA AAAAACCACGCGGACGGGAC  
 GGGCCGTGGCTTGTGACGCCGGATCCCCGCGTATAATCCGTGTCACGCTAAAGGACAAAATC  
 GGTTTATCCGAGCGGTTTACGGGAAGGGTCTTTTGTCTATCTCGCAGTAGCGTGTGCCTGGTT  
 ATCCCAATACTACCACCACACCTGTGCTTTTTTTTATCTTGTACGTGCATGTATGCGTATGTT  
 TTCTTTTTTTCCGTTGGTGTCTATTTCGCTACCGTCTCGTTGATCCATGAATCACAACACAA  
 GCCGTTCTGCTTACTATACAAAATAG

>YJL066C 1.57 Hot

ATGGGCTTTTATGAAGGCGATGACAATGATGCCAACACCAAGGCATTTAATGACAAATATAT  
 CAAAGATCAAAAAGTTCGCAACGGCACCCCTTCTGGAACCTCTTTCCAAAGTTAAGGGATATTG  
 ATGAATACGATAATCCACTCCTACCCTGCCCCTCAATTTCAACTTCAGAGATCTTGGAGAT  
 AGTGCACCTTGCCATGGCGTCCGGAATCCCTACGGTGAAGCAGTTTGACAAGTGCGAAGA  
 TAAGGGCCAGTCTGCATGGACCACCAAGGGATTTGAAAATGTCTTGTCCCAAGTAAGGCTA  
 TCCCCCTCTACCACAATTGGACTTCCTCTTACCTCTGGAGGAGATCAAATCTGACAAGTCG  
 CACTCTCATGGGTGTTCTTCAATGATTTCAACCTCTTTTGAAGTGGAGGTGCGACATGAA  
 TAGACTACAAAAACAAAGAATCAAGACTAGGAGCACTGCCGTAGAGCCTCTGGCTAGA  
 CAGAACCTCATGTTGAATTGGGACGACTTGCATCTGGGCAACGATGCTGAATATGCTTCT  
 GCAGATGGATCCAAGAAAATTTGTTGGAAGGGCACAGTCCATTAGTACCACGAAGGATCCAA  
 TGATGCAAAACCCAGCACCGTCAAACTGAAAAAATCTACTTTGACGATGGCACGGTAGACA  
 TTACTACCACCCTACCTCCAAGGGTTCCAGTCCCCAGGTGAAGCATAAAGTGGTGAGTGT  
 GACGAAGACAATTAG

>YKL190W 1.69 Hot

ATGGGTGCTGCTCCTTCCAAAATTTGTGGATGGTCTTTTAGAAGATACAAAATTTGATAGAGA  
 TGAAATTTGAAAGGTTAAGGAAGAGATTCATGAAATTAGATAGAGATAGCTCAGGGTCTATTG  
 AAAAAATGAATTTATGAGCATTCCTGGCGTTTCGTCAAACCTCTTGCTGGACGTATAATG  
 GAGTTTTTCGATGCTGATAATAGTGGGGACGTGGATTTTCAAGAGTTCATCACAGGATTATC  
 CATTTTCAGTGGGCGTGGGTCCAAGGACGAAAAGTTAAGATTCGCCTTCAAATCTACGACA  
 TTGACAAGGACGGTTTTCATATCCAATGGTGAGTTGTTTCATCGTGTGAAAGATTATGGTAGGT  
 TCTAATCTGGACGATGAACAGCTGCAACAGATAGTAGATAGGACGATAGTGGAAAACGATAG  
 CGACGGCGACGGACGTTTTAAGTTTCGAGGAGTTTTAAGAATGCTATCGAAACCACAGAAGTGG  
 CCAAGAGTCTGACATTGCAATACGATGTGTAA

>YJL052W 2.22 Hot

ATGATCAGAATTGCTATTAACGGTTTTCGGTAGAATCGGTAGATTGGTCTTGAGATTGGCTTT  
 GCAAAGAAAAGACATTGAGGTTGTTGCTGTCAACGATCCATTTATCTCTAACGATTATGCTG  
 CTTACATGGTCAAGTACGATTCTACTCATGGTAGATACAAGGGTACTGTTTCCCATGACGAC  
 AAGCACATCATCATTGATGGTGTCAAGATCGCTACCTACCAAGAAAGAGACCCAGCTAACTT  
 GCCATGGGGTTCTCTAAAGATCGATGTGCGTGTGACTCCACTGGTGTTTTCAAGGAATTGG  
 ACACCGCTCAAAGCACATTGACGCTGGTGCCAAGAAGGTTGTCATCACTGCTCCATCTTCT  
 TCTGCTCCAATGTTTGTGTTGGTGTAAACCACACTAAATACACTCCAGACAAGAAGATTGT  
 CTCCAACGCTTCTTGTACCACCAACTGTTTGGCTCCATTGGCCAAGGTTATCAACGATGCTT  
 TCGGTATTGAAGAAGTTTTGATGACCACTGTTCACTCCATGACCGCCACTCAAAGACTGTT  
 GATGGTCCATCCCACAAGGACTGGAGAGGTGGTAGAACCGCTTCCGGTAACATTATCCCATC  
 CTCTACCGGTGCTGCTAAGGCTGTGCGTAAGGCTTTGCCAGAATTGCAAGGTAAGTTGACCG  
 GTATGGCTTTTCAGAGTCCCAACCGTTCGATGTTTCCGTTGTTGACTTGACTGTCAAGTTGAA  
 AAGGAAGCTACTTACGACCAAATCAAGAAGGCTGTTAAGGCTGCCGCTGAAGGTTCAATGAA  
 GGGTGTGTTTGGGTTACACCGAAGATGCCGTTGTCTCCTCTGATTTCTTGGGTGACACTCACG  
 CTTCCATCTTCGATGCCTCCGCTGGTATCCAATTGTCTCAAAGTTCGTCAAGTTGATTTCC  
 TGGTACGATAACGAATACGGTTACTCCGCCAGAGTTGTTGACTTGATCGAATATGTTGCCAA  
 GGCTTAA

>YOR174W 1.55 Hot

ATGCTGTCCAAGATACTAAAGCGGTAGAGTTTTCTATGGGTCACATCAGATCATCCTCTGT  
 ATCCCTGGTAGCAGAGGCTACTTCAAACACGAATAGTGAAGACAAATTATCTAAGGTCCAAC  
 TCTACGAAGATTTGTGCCGGTACGAGGATACATTGAGTAAGTTGGTGGAACTCTGTAGATCGT  
 TTCAAACCAAACCTTGATATTGCCAAGGATTTGATCAGAATGATGAGGCCTTGTGTTGAAA  
 CGTCAAACCTGTTAGCTGAATATGACAATATCTACCGCAACTTACAGAAGATTGACAAAGACT  
 CTGAAGAACTAGATTTCTAAAACAGGAAGATATTGAAAATCTAAATGAATGTCATGACGAG  
 TTTAAAAGCACTACCGATGCTTGAACAAGTAGAGTTCGAGAAAAACAAATTTTACAGCAAAG  
 ATCGAAAATCAATTCGACAGAGTTGTTGGATTATGCCACCAAACCTCTCCAAGTTTACCAAAA  
 TACCACCAACGTTTCGACAAGGGAGCTGTGGGACCAACAATTTTATATGGCCCGCAGAGGAT  
 GCCCTACGAAGAGGAATGCTTGTCTATGGCTCATTACATAGTAAAGAGCTAACTAGAATACC

CGGTGAAGAAGTAGAAGAAACAGAAGTACCGACCGTACCGCCATCTCAAAGTGAAGAACAAA  
 AAGGGCAGATGGCCAAGAAAGAAGGTACACCAAAGACAGACTCGTTTATATTTGATGGTACT  
 GCTAAAGAAGTTGGTGATGAGGCAGACAATACCAAAGATAAAGAAAAGGAAGAAAATAATGA  
 TGATGCCCTAGATCTTGATCTTGATCTGTTTGATCCGGACGACTTCTAG

>YOR140W 1.89 Hot

ATGAGTGAAGAGGAAACGGTCTCAGCCCCAGCTCCAGCTTCTACACCGGCCCGGCTGGAAC  
 CGATGTAGGTAGTGGTGGAGCAGCAGCTGGAATAGCTAATGCTGGTGCTGAAGGCGGCGACG  
 GTGCCGAGGATGTTAAGAAACATGGGTGCAAGATGCTAGTGGGGCCAGGCGCCACAAAAT  
 GCGATATTCATCCATAAGCTATACCAGATTCTGGAGGACGAATCGCTACACGACTTGATATG  
 GTGGACCCCTTCGGGCTTATCCTTCATGATTAAGCCTGTGGAACGGTTTAGTAAGGCTTTGG  
 CTACATATTTCAAGCATACTAATATCACGAGCTTTGTAAGACAGTTGAACATTTACGGCTTT  
 CACAAGGTGTGCGATGATCATAGCAGCAACGACGCTAATAGTGGCGACGACGCCAATACTAA  
 TGATGACAGCAATACTCACGATGATAATAGTGGCAACAAAAACAGTAGTGGCGACGAAAATA  
 CCGGTGGCGGTGTCCAAGAAAAGGAGAAAAGTAACCCCACTAAAATCTGGGAATTTAAGCAT  
 AGTTCCTGGTATTTTCAAGAAAAGGTGACATTGAGGGACTCAAACACATTAAGAGAAGAGCTTC  
 TTCCCGTAATAACTCCTCAATTAACAGTCGAAAGAATTCTAGTAATCAAAACTACGATATAG  
 ATTCCGGTGCAAGAGTAAGACCCCTCTTCGATTCAAGACCCGTCCACCAGTTCCAATTCCTTT  
 GGTAATTTTCGTTCCGCAAATTCGGGGCGCAATAACTCTATCCCGAGTACTTTAATAACTC  
 TCATGTAACCTTACGAAAACGCAAACCATGCCCGCTGGAATCCAATAACCCGGAAATGCAAG  
 AGCAAAACAGACCTCCGAACCTTCAAGATGAAACACTGAAACATTTGAAAAGAAATAAAATTTT  
 GATATGGTTAAGATTATAGAGTCTATGCAGCATTTCATATCTTTGCAACACAGTTTTTTGTTT  
 ACAGAGTTTACCTTCAAGAATGTGAGCAAGAAAAAATCGGAAAATATCGTGAAGGATCACC  
 AAAAGCAACTTCAGGCATTCGAAAGCGATATGTTAACTTTCAAACAGCACGTCATGTCGAGG  
 GCCCACCCTACAATAGATTCTCTTTGTGCTGTAATGCTGCCGCTACCGCTGCCTCTGTGCG  
 CCCTGCACCCGCGCCACATCCACATCTGCATATGCACCCAAATCTCAGTATGAGATGATGG  
 TTCTCCAGGGAACCAGTATGTCCCGCAGAAATCTTCTCGACCACGAACATCCCTTCGAGA  
 TTCAACACGGCTTCAGTGCCGCCCTCGCAACTTTTTGTACAATACCAACCGCAGTCGCAACCA  
 ACATGTGACTTATGCGAGCGAACCGGCACATGTACCAAACCTTTATCAATCAGCCGATACCCA  
 TCCAACAACCTACCTCCACAATATGCAGACACTTTTAGCACTCCACAAATGATGCACAATCCT  
 TTTGCCTCGAAAAATAACAACAAACCGGGCAACACGAAGAGGACCAATAGTGTTCTCATGGA  
 CCCGCTGACTCCCGCAGCGAGTGTTGGAGTTCAGGGTCCACTAAACTATCCTATCATGAATA  
 TTAATCCTTCTGTCCGTGACTACAACAAGCCTGTCCCTCAAATATGGCTCCGAGTCCAATA  
 TATCCTATTAATGAACCAACAACGAGATTGTATTCTCAACCAAAAATGAGAAGTCTCGGGTC  
 TACAAGCTCTTTGCCAACGATAGAAGAAACAGTCTCTGAAGCTGACACCGAGATCATCGT  
 TGAATGAAGATAGTCTGTATCCCAAACCTAGAACTCTCTCAAATCCAGTATTTTCGGGCACG  
 TCTTTATCCTCCTCTTTTACACTAGTTGCCAACAATCCAGCCCAATTCGGTACTCTCAGCA  
 GGGATTGCTTCGCTCATTAAACAAGCTGCTAATTGTGCTCCAGATTTCGGTAACTCCATTAG  
 ACTCGTCTGTCTTACGGGCCCTCCTCCAAAAACATGGACAATCTTCTGCTGTTTCTTCA  
 AATTTAATAAACTCCCCATGAACGTGAGCACAGCTCAAGCCTATCACAAGCAGAACCCTGC  
 ACCACAAATAGAACTACCGCAGCCATCTTTGCCCAACGAGCACCCTAAGAATACTGGCG  
 AGGCTGACAATAGTAAGAGAAAAGGGAGCGGTGTTTATTCTTTACTGAATCAAGAGGATAGC  
 AGCACGTCCAGTGCTGATCCTAAAACCTGAAGATAAGGCCGCTCCGGCACTCAAAAAGGTTAA  
 GATGTGA

>YBR106W 2.26 Hot

ATGAATCCTCAAGTCAGTAACATCATCATCATGTTGGTCATGATGCAACTCTCCCGTCGCAT  
 TGACATGGAGGACCCAACCATCATCATGTACATTAGAATTTTATACTGTTCTTCCATCGGTA  
 TCTCTTGGATCATCTACCAAATGGCCAGAAAGAGAATTGTTGCTAAAAACGACATGACTACC  
 ATGAAGTACGTCGAACCTGGTAATGCTATGTCCGGCGAAGGTGAGAAGCTGCAAGTTACTAC  
 CGTCAGAGACTACGATTTGAAGGAAATAGACAGTGCTATCAAGTCTATCTACACTGGTATGG  
 CTATGATGGGTTTCATGCATTTGTAAGTGTACTTGAATAACCAACCCATTGTTTCATGCAATCCATT  
 TCTCCAGTGAAAAGCGCTTTGGAACACAACGAAGTAAAAATTCACCTCTTCGGTAAGCCTGC  
 AACCGGCGATTTGAAGAGACCATTCAGGCTCCATCTTTGTTTGGTGGTATGGGTCAAACCTG  
 GTCCAAGACCGACAAGAAATCTATCGAAGAAGCTGAAAGAGCCGGTAACGCTGGTGTAAAG  
 GCTGAATGA

>YGR175C 2.51 Hot

ATGTCGTGCTGTTAACGTTGCACCTGAATTGATTAATGCCGACAACACAATTACCTACGATGC  
 GATTGTCATCGGTGCTGGTGTATCGGTCCATGTGTTGCTACTGGTCTAGCAAGAAAGGGTA  
 AGAAAGTTCTTATCGTAGAACGTGACTGGGCTATGCCTGATAGAATTGTTGGTGAATTGATG  
 CAACCAGGTGGTGTAGAGCATTGAGAAGTCTGGGTATGATTC AATCTATCAACAACATCGA  
 AGCATATCCTGTTACCGTTATACCGTCTTTTTCAACGGCGAACAAGTTGATATTCCATACC  
 CTTACAAGGCCGATATCCCTAAAGTTGAAAAATTGAAGGACTTGGTCAAAGATGGTAATGAC  
 AAGGTCTTGGAAGACAGCACTATTCACATCAAGGATTACGAAGATGATGAAAGAGAAAGGGG  
 TGTGCTTTTTGTTTCATGGTAGATTCTTGAACAACCTTGAGAAACATTACTGCTCAAGAGCCAA  
 ATGTTACTAGAGTGCAAGGTAACGTATTGAGATATTGAAGGATGAAAAGAATGAGGTGT  
 GGTGCCAAGGTTGACATTGATGGCCGTGGCAAGGTGGAATTC AAGGCCACTTGACATTTAT  
 CTGTGACGGTATCTTTTTACGTTTCAGAAAGGAATTGCACCCAGACCATGTTCCAACGTGCG  
 GTTCTTCGTTTGTGCGGTATGCTTTTGTTC AATGCTAAGAATCCTGCTCCTATGCACGGTAC  
 GTTATTCTTGGTAGTGATCATATGCCAATCTTGGTTTACCAAATCAGTCCAGAAGAAACAAG  
 AATCCTTTGTGCTTACAACCTCCAAAGGTCCAGCTGATATCAAGAGTTGGATGATTAAGG  
 ATGCCAACCTTTCATTCCAAAGAGTCTACGTCCTTCATTTGATGAAGCCGTCAGCCAAGGT  
 AAATTTAGAGCTATGCCAAACCTTACTTGGCCAGCTAGACAAAACGACGTCCTGTTATGTG  
 TGTATCGGTGACGCTCTAAATATGAGACATCCATTGACTGGTGGTGGTATGACTGTGCGGTT  
 TGCATGATGTTGTCCTTGTGATTAAGAAAATAGGTGACCTAGACTTCAGCGACCGTGAAAAG  
 GTTTTGGATGAATTACTAGACTACCATTTTCGAAAGAAAGAGTTACGATTCGGTTATTAACGT  
 TTTGTCAGTGGCTTTGTATTCTTTGTTTCGCTGCTGACAGCGATAACTTGAAGGCATTACAAA  
 AAGGTTGTTTTCAAATATTTCCAAAGAGGTGGCGATTGTGTCAACAAACCCGTTGAATTTCTG  
 TCTGGTGTCTTGCCAAAGCCTTTGCAATTGACCAGGGTTTTCTTCGCTGTGCTTTTTTACAC  
 CATTTACTTGAACATGGAAGAAGCTGGTTTTCTTGGGATTACCAATGGCTTTATTGGAAGGTA  
 TTATGATTTTGTATCACAGCTATTAGAGTATTCACCCCATTTTTGTTTGGTGAGTTGATTGGT  
 TAA

>YER085C 1.75 Hot

ATGAATTTCAAGGAGCCGCTAGTGAATTTTTTAAAATGCGTCTTGAATAACATAAACTCGGC  
 ATTTTCGCATAGGATTGATCAATTGCAATTGCAGCTGTTGCGGGAAACAAATATCTTGAGGG  
 TTTTGAACAGGGGAATAGAGAGACTGTTTAGCGAGAATCCAAGGACCCATTCCTGTTTCCCGT  
 ATCGTGGTGGAAAAAGATGTGGGCTGCAGAATTGGACGATATGTGGAAGTTCTAAATATGA  
 ACTGGTAGAGTCCAGGGCGAAAGAAATACAAATATATTATGAAAGGATGTTTTTGAATAA  
 CACAAGAATTGAAAGGGGACAAGCGGGTGTTCCTTGATTGCAAATCTTCCCAAAGATAT  
 AGCGCAGAGAGGAAAGAAATACGAAATGTAAAGGTGCATGTTGGGCGGCCATGTAATGAGAA  
 CGAATTCAGGTGATTCCGATAAGATTCAAACCTATTAATTTGGAAAGAAGAGCACGACTGA  
 TAAGAAAGAAGAAGACTATTAATTAA

>YKL186C 1.89 Hot

ATGAACACCAATAGTAATACTATGGTAATGAATGACGCAAATCAAGCACAAATAACGGCCAC  
 ATTTACGAAGAAGATATTAGCGCATTTGGATGATCCGGACTCCAACAAATTTGGCCCAATTCG  
 TACAGCTTTTTTAATCCAAACAACCTGCAGAATAATATTTAATGCTACCCCTTCGCGCAAGCA  
 ACAGTTTTTCTGCAAATGTGGCAAACACAGGTGCTACAAACACAACATGCCCTAACAGGAGT  
 AGACTATCACGCTATTCCGGGATCCGGCACGTTGATATGCAACGTCAATTGCAAAGTCAGAT  
 TCGACGAAAGCGGCAGAGACAAGATGGGGCAAGACGCGACTGTTCCCATTC AACCAAATAAC  
 ACTGGGAACAGAAATCGACCCAACGATATGAACAAGCCAAGACCTCTATGGGGTCCATATTT  
 TGGCATTTCCCTGCAGCTGATCATCGACGACCCGATATTTAGAAATGATTTTAAATGGTGTA  
 TATCGGGGTTTTAACTATAACATGGTTTACAAACCCGAGGATTCCTCTGCTAAAAATTTAG

>YDR229W 1.64 Hot

ATGCCTGACAATAACGGAGCAATTGCAGGGATCTCCTTCAAGTGACCAGAGACTGAGGGT  
 TGACTGGGACAACGGTAACCATTTTGACGCTCTCTCCCGACAGATACGCGCCTCATCTATCTG  
 AATTTTACCCAATTGTAAATAGTAAAAGACCAGTGGCTAGCAGTGCTGGCTCAGAAAATAAC  
 GACCATCTGGACGACATGAACCATTTACGTTTCATCCAAAGTGTATTCAAAGGCCCGTCTGGGC  
 ATCGAGCATAACTTCTGGTACGAGCACAATAAACGACTTGCAAACGCTAATCACAAGAGAG  
 ATGTGAAAGAGACCCAGGAAGCCCTATCGACATTACTCAGGAACTCGAATGCTTATTCGGAT  
 TCGTTATTAAGACATCTCAGAATGGGGCAGAAATTGCCCATTCCTTAGAAAACATTGCCAA

GTTGAAGGGTTGCAATGATGAAACGGCGGAGAACTATTGAGTGCCAGTGGGTTATTCTACC  
TTTTATCTAATCATCAGCTTATAATGTCAAAGTATTTCAATGACTTGTGGGAGATAATTTA  
ATTGATGATATTGATGAATTCGAATTACAGACCAAGATAATGGAGAACAAGTTCAAAGCACA  
AAGCAAAGAGCAAAGTTTAAAAATTGAAATTGCAGGAAAGACATAACTTCGATATCTCGAAAA  
GAAAAATAAGGAATTTAATCTCATAACCGAGAGAGCCTTTCTAGCTTGCAAGCAAGGTTAGAT  
CAACTGGAGACACTAAAGCACGATTTTTTACATGGATTTCATACGAACTTGTGGAAAATACATG  
CAACAAAGTACTCAGCAAAGTTGCCACGGTATCTAGGGCACAAGTGGAAAATTTCTGAAAATA  
TTGCAAGGAAAGGTTGGTCTGGAGGCGGGCTAGACGAACTACTTTGTGATGCAGACGACCCC  
TTCAGCAAAAAAGCAGATGGGCCATACGGGACCATCGGTGGTGTGATGGAGAGACTGCTGGAGA  
AGCATAACAACAGCGATGAGGAAACGGGTGGGAATGACGTGGTGTCAATGAACTACTAGAAG  
GAACCAGCCAACCTTCCACATCAAAAACATCTTTACCCAAATCCAAGGGGTCTCAACGGTA  
TCCACACCGAATCATTACAGTCAAGTTCAAACAAGGACGGGGTACGAAAACATGGCGGCGG  
CAAAAATGGCGAAGATGAGGATACAGACAATTTGATGGGAACAGAAAATTCATTTTCTTTAC  
CGCTACGAGAACTCTGCCGAGGAAACCACACAACGTTTAAACAATTGTCCATTAAGAA  
GATAATGACAATCACAGCAGCGATACGGACGGCATGCAAGACCAGTCAAGTAATATATAA

>YDR232W 1.82 Hot

ATGCAACGCTCCATTTTTGCGAGGTTTCGGTAACTCCTCTGCCGCTGTTTCCACACTGAATAG  
GCTGTCCACGACAGCCGCACCACATGCGAAAAATGGCTATGCCACCGCTACTGGTGTGGTG  
CCGCTGCTGCCACTGCCACAGCGTCATCAACACATGCAGCAGCAGCAGCAGCCGCTGCTGCC  
AACCATTCACACCAGGAGTCGGGTTTTCGATTACGAAGCCTGATAGATTCGAACTGCAGAA  
GAAAAGACTTGACAAATCGTACAGATATTTCAACAATATCAACCGATTGGCCAAGGAGTTCC  
CCCTAGCTCATCGCCAGAGAGAGGCGGACAAGGTCACCGTTTGGTGTTCACGACTATTTA  
GCATTTTCCAAGCACCTGAGGTATTGGACGCCATGCATAAACTATCGACAAGTATGGTTG  
TGGTGCCGGTGGTACAAGAAACATTGCTGGCCATAACATCCCACTTTGAATCTGGAAGCCG  
AATTGGCCACTTTACACAAGAAGGAAGGTGCCTTAGTTTTTTCGTTCATGTTACGTAGCCAAC  
GATGCCGCTTTATCCCTACTGGGTCAAAAAGATGAAGGACTTGGTGTATTTCTCCGACGAACT  
CAACCATGCGTCCATGATTGTCGGTATTAAGCATGCTAACGTAAAAAACACATTTTCAAAC  
ATAATGACTTGAACGAATTGGAACAACCTGCTCCAGTCATACCCCAAATCCGTTCTAAACTA  
ATTGCTTTTCGAATCAGTATATTCTATGGCCGGTTCAGTGGCCGACATAGAAAAATTTGCGA  
CTTGCCGACAAAATACGGTGTCTTTGACCTTCTTGGATGAAGTACATGCGGTCCGGCCTGTACG  
GCCCTCACGGTGCAGGTGTTGCAGAACATTGTGATTTTGAAAGTCACCGTGCAGTGGTATT  
GCTACCCCAAAGACCAATGACAAGGGCGGCGGAAGACTGTGATGGACCGTGTGACATGAT  
CACCGGCACTTTAGGTAAGTCTTTTCGGTAGCGTAGGTGGCTACGTGCGAGCCTCTAGGAAAT  
TGATCGATTGGTTCAGATCGTTTGCACCTGGTTTTCATTTTACCACGACTTTACCACCTTCA  
GTTATGGCAGGCGCTACCGCAGCAATTAGATACCAACGTTGCCACATCGACCTAAGAACCTC  
GCAACAGAAACATACCATGTACGTAAGAAAGCTTTCCATGAGTTGGGCATTCCAGTTATTC  
CAAATCCTTCTCATATCGTCCAGTGTGATTGGTAATGCTGATTTGGCTAAGCAAGCTTCT  
GACATCTTAATCAATAAGCATCAAATCTACGTACAAGCTATCAACTTCCCTACGGTTGCTCG  
CGGTACCGAAAGATTGAGAATTACCCCAACGCCAGGTACACCAACGATTTATCTGACATCT  
TAATCAATGCAGTTGATGATGTGTTCAATGAGCTACAGTTACCACGTGTCAGAGACTGGGAA  
AGCCAAGGTGGCTTATTGGGTGTTGGAGAGAGCGGATTTGTGGAAGAGTCAACTTATGGAC  
ATCAAGCCAACATCTTTAACTAATGACGACTTGAACCCTAATGTTAGAGACCCCATCGTTA  
AACAACTAGAGGTTTCTAGTGGTATCAAGCAGTAA

>YJR060W 1.71 Hot

ATGAACTCTCTGGCAAATAATAAAGCTTTCTACTGAGGATGAGGAAATCCATTTCGGCAAG  
AAAAAGAGGGCTATAACGAGGAGCAGAACTACAGCGAGGCCAGGAAAAAGCAAAGAGATCAAG  
GCTTGTGTGTCACAAGAGAGCAATGACGGAAATATTGACTCTGCTCTGTTGAGCGAAGGGGCT  
ACGCTAAAAGGGACTCAAAGTCAGTATGAAAGCGGACTGACGTCTAACAAAGATGAGAAAGG  
AAGTGATGACGAAGATGCGTCAGTGGCTGAGGCTGCTGTTGCCGCTACCGTCAATTATACAG  
ACTTAATCCAGGGCCAGGAAGATAGTTCTGATGCCCACACATCTAATCAAACGAACGCGAAT  
GGTGAGCACAAGGATTCCTTAATGGGGAAAGAGCCATAACCCCATCAAATGAAGGAGTCAA  
GCCAAACACCTCCCTGGAGGGAATGACGTCTTACCAATGGAATCTACACAGCAATCTAAAA  
ACGACATGCTCATACCATTTGGCAGAACACGATCGTGGGCCAGAACACCAACAGGATGATGAA  
GACAAATGATGACGCTGACATTGATCTCAAAAAGGATATAAGCATGCAGCCGGGTGCTGTTGG  
AAGAAAACCTACTACTTTGGCCACAACAGACGAGTGGAAAAAGCAAAGAAAAGACTCCCATA

AAGAAGTCGAAAGGCGTCGCCGCGAAAACATCAACACTGCAATCAACGTTTTAAGCGACCTC  
 CTGCCCGTGAGAGAATCAAGTAAGGCAGCAATATTGGCGTGTGCCGCTGAATACATTCAAAA  
 ATTGAAAGAAACCGATGAAGCAAACATCGAAAAGTGGACGTTACAAAAATTGCTTAGCGAGC  
 AAAACGCATCGCAATTAGCCAGTGCAAATGAGAACTGCAGGAAGAACTGGGAAATGCTTAC  
 AAAGAAATCGAGTACATGAAACGCGTTTTAAGGAAGGAGGAATAGAATACGAGGATATGCA  
 CACTCACAAGAAACAAGAGAACGAAAGAAAAAGCACTAGGAGCGATAATCCACATGAGGCTT  
 GA

>YDL111C 1.64 Hot

ATGTCCTTTTTCGGTCGCCGAAAAGTCGTACCTATACGATTCCTAGCAAGCACGCCTTCAAT  
 TAGGCCCGATGGAAGACTACCTCATCAATTCAGACCTATAGAAATATTTACTGACTTCCCTAC  
 CAAGTTCCAATGGATCGTCCAGAATTATAGCTAGTGATGGAAGTGAATGTATCGTGAGCATT  
 AAGTCCAAAGTTGTGGATCATCATGTGGAGAATGAACTACTTCAGGTCGATGTAGATATCGC  
 AGGCCAAAGAGATGACGCGCTGGTAGTAGAGACAATCACTTCTTTACTGAACAAGTTTTGA  
 AGTCTGGTAGCGGAGTAGATTCCCTCAAAGTTGCAATTGACAAAAAGTACAGCTTCAAAATA  
 TTTGTGCGATGTTCTGGTCATTTTCATCACATTCACACCCAGTTTCTTTAATATCCTTTGCTAT  
 TTATTCAGCGTTGAACTCCACATACCTACCGAACTTATTTTCAGCTTTTGACGACTTAGAGG  
 TGAAGAAGTTCTTACGTTTCATGATTACGACATGGTTAAGCTTGACATTAATCCGCCTTTA  
 GTGTTTATATTGGCCGTTGTAGGCAACAATATGCTATTGGACCCTGCAGCCAACGAAAGCGA  
 AGTGGCCAATAATGGCCTAATCATTTCCTGGTCTAATGGTAAGATTACATCACCTATCAGAT  
 CAGTAGCATTGAATGATTCAAACGTTAAAAGCTTTAAACCTCATTGTGTTGAAGCAAGGTCTT  
 GCAATGGTGGAGAAATACGCCCCCGACGTAGTACGATCACTGGAGAATTTATAA

>YCR068W 1.52 Hot

ATGTTGCATAAAAAGCCCTTCAAGAAAGAGATTTGCTTCTCCTTTGCATCTAGGATGCATTCT  
 AACGCTTACAGTGCTCTGCCTTATTGCTTACTACTTTGCTTTACCGGATTATTTATCGGTAG  
 GGAAGAGCTCATCCAGGGGTGCCATGGATCAAAAATCTGATGGAACCTTTAGACTTAAGTCT  
 ATCTACAGGCATGGCGTCGGAGCAAACCATCGGCTACACCAGAGGCTGGAGGTCCTCCAGA  
 AGTTATTTCTGCCGCTGGAATGCTGTATCAAGAAACCACAACCTCAAGGACAGGATTTTGAAG  
 ACCAAGAACCCCTATGGACTACTAATGCCGAATATGCCACCCTAACCCATTTCGATTTTGAAG  
 TTTGAGCTACGAAGGATGCCGCTATTGATGAAGCGGATGAAGGAAAGAGATCCTGAATTCAT  
 AGAGTCGTACATTTACGGAGAAACATACATGACGGAGGAGGAAGAACACGCCATGTGGATAG  
 ATGATGACATTGTGGACCCAATATCACAGATAGAGGTACAGTAGTGCTTAGCATTAAATG  
 TCGTCTAATGCTTACGTGAGAATACCGCAAACGGGAGACTGGCGTAACGTCACGGAGCCGTG  
 GAATGAAACAGAGCCGGAAGATTTTGGTTGGGATGGTGATGGTATACGTGGTCACGCTTTTT  
 ACAATGAAGTGGAGAATATCGTGGTACTCTCGATAAAGGGAACCAGCGCTCAGGGTTTGCCA  
 GGGTCTGGCGAAGATGAGACAACCTGGAACGACAAGATCAACGATAATTTGTTATTTTCGTG  
 TTGTTGTGCAAGAGTGAGCTACCTGTGGACTACCGTGTGCGATTGCTATGTGAAGTCGTATA  
 TATGCGATGAGTCTTGCCTGGAAAAGGAACTGAGACGTAAGGATAGATTTTACTCTGCAGTC  
 GTTGACATATACAAAGGCGTCCCTCAAAGAATACCCCGATGCGCCATATGGGTACAGGCCA  
 CTCCTGGGAGGCGCATTGGCCAGTTTACTGGGCCGCACTTTTGGATTGCCGCTGCGGTCGCAT  
 TCGAGTCCCCTGGAGAGCTACTACCTTCAAAAAGACTTCACTTACCATTCCCACGGGACTT  
 CCTCATAACATGGAGGGTATCTGGCACTTCGGTCAACGCAGACCCAATCTTCATGGGTAC  
 ATGCAACGGAGCTAGTTCAAGTTGCTCACTGGTGGGCTACGCTATGGAACCCGCGTGCCACA  
 CTGGTAGAGTCTGTGTCTACGATGTGGTCAACGACAAGGGCTGGAGTGTAACATGTTCAAC  
 CACAGAATCCACAAAGTCATTGACGAAGTTCTCCTTGGATACGAGCAGGCTGCCAAGTGCCT  
 TGAACCAGAGCCCTGCGTAGATTGCTACAACCTGGAAGTTTATTCCAAGCAGAGACTGGGAAT  
 CCTCATCGAGGCTCATTACCAAGACTAAAAGCCACGCTGCACCAACCACGACTCGCACC  
 ACTGCTACTACTACCTCTTCATCTACCTGTGTAGGCCGCAATTTGGCTTGGCTTCTGCACCAA  
 ATACGAGTTGTAA

>YIL062C 1.54 Hot

ATGGAAGCCGATTTGGAGGAGAATTGACATCGATGCATTTGATCCAGAGAGTGGCAGACTAAC  
 CGCTGCCGATCTGGTACCACCATAACGAACTACTGTACATTACAAGAATTACAACCTCGAA  
 TGAATCAATTGCGCTCGCTTGCCACAAGTGGTACTCTTTGGGAGCCGTTCAATTACTCACA  
 ACCGATCCTCCATACAGTGCAGATGCTCCAACAAAGGAGCAATATTTAAGAGCGTCTTGA  
 AGCATTGACACAAGTCAGGCAAGCCGATATTGGTAATGTAATCAAAAATTTGAGTGATTTCTC



AGAGGGACGTGCTGGTAAAGTATCTCTACAAAGGAATGTCCGTACCTCAGGGCCAGAAACAA  
GGGGGTGTCTTGGCTTGCCTGGCTGGAAAGAATTACTCAAGTCAGTGGTGTACACCTATCGT  
TCATTATATATCGGATAGAAGAACTGTATGA

>YIL099W 2.56 Hot

ATGGCAAGACAAAAGATGTTTTATAACAAATTACTCGGCATGCTCAGCGTAGGATTCGGGTT  
TGCTTGGGCGCTCGAGAACATTACTATATACGAATTTGACTTTGGCAAGGGCATTCTCGATC  
AAAGCTACGGCGGTGTATTTTCAAACAACGGCCCTTCGCAAGTGCAGCTGCGGGATGCAGTC  
TTGATGAATGGGACAGTGGTATACGATTCAAACGGCGCTTGGGACAGTAGTGCCTGGAGGA  
ATGGCTCCAGGGACAGAAAAAAGTTTTCCATCGAAAAAATATTTGAAAAATTTGGGCCAGCG  
CCGTGTATCCGTCTATTTTCGCTGGGGTGTGATTGCGTCACCATCGCAAACGCATCCAGAC  
TACTTCTACCAATGGATAAGGGACAGCGCTTGACGATAAACAGTATTGTCTCTCATTCTGC  
GGGCCCGCAATAGAGACGTTATTGCAGTACCTGAACGTTTCATTCCACTTGCAAAGAAGCA  
ACAACACATTGGGCGCTGGCATTGGTTACACTAACGATACAGTGGCTTTGGGAGACCCTAAG  
TGGAACGTCGACAACACGGCTTTCACGGAAGATTGGGGTGTCTCCTCAAAACGATGGGCCCTGC  
TCTTCGAAGCATTGCCATCTTAAAAATCATCGACTACATCAAGCAATCTGGCACTGATCTGG  
GGCCAAGTACCCATTCCAGTCCACCGCAGATATCTTTGATGATATTGTACGTTGGGACCTG  
AGGTTTATTATTGACCACTGGAATTTCTCCGGATTTGATCTATGGGAGGAAGTCAATGGCAT  
GCATTTCTTTACTTTACTGGTACAACGTCTGCAGTGGACAAGTCGCTGTCTGATTTTTAACG  
CCTCAGAACGGTGTCTCCCTTTGTTGAAGAATTGCGTCAGACACGCCGGGACATCTCCAAG  
TTTTTTAGTGGACCCTGCGAATGGGTTTATCAACGGCAAGTACAATTATATTTGTTGGGACACC  
CATGATTGCCGACACATTGAGATCCGGACTGGACATATCCACTTTTATTAGCTGCGAACACCG  
TCCACGATGCGCCATCTGCTTCCCATCTTCCGTTTCGATATCAATGACCCTGCCGTCTGAAC  
ACGTTGCACCATTTGATGTTGCACATGCGTTCGATATACCCCATCAACGATAGCTCCAAAAA  
TGCAACGGGTATTGCCCTGGGCCGGTATCCTGAGGACGTATATGATGGATATGGCTTTGGCG  
AGGAAAATCCCTGGGTCTGGCCACGTGTACCGCTTCAACAACGCTTTATCAGCTCATTAC  
AGACACATCTCTGAGCAGCATGACTTGGTTGTCCCAATGAACAACGATTGTTGCAACGCATT  
TTGGAGCGAGCTGGTATTCTCCAACCTCACGACTTTGGGAAATGACGAAGGCTATTTGATTT  
TGGAGTTCAATACACCTGCCTTCAATCAAACCATACAAAAAATCTTCCAACCTAGCTGATTCA  
TTCTTGGTCAAGCTGAAAGCTCACGTGGGAACAGACGGGAACTAAGTGAACAATTTAACAA  
ATACACAGGGTTTATGCAGGGTGCCCAACACCTTACCTGGTCTTATACTTCATTCTGGGATG  
CCTATCAAATAAGACAAGAAGTTTTACAGAGTTTGTAG

>YBR213W 1.55 Hot

ATGGTCAAATCGCTACAGCTAGCCATCAATTAAGACAAGAAAATACTACTAATCGGAGG  
CGGAGAAGTCGGCTTGACAAGGTTATATAAGCTGATACCTACAGGTTGCAAGCTGACTTTAG  
TATCTCCTGACCTACACAAATCCATTATTCCGAAGTTTGGAAAATTCATCCAGAACGAGGAT  
CAGCCCGACTACAGAGAAGACGCTAAACGCTTTATCAATCCGAACCTGGGACCCACGAAGAA  
TGAAATTTACGAGTACATCCGCAGTACTTCAAAGACGAATACCTCGACCTAGAAGACGAGA  
ACGACGCGTGGTACATAATAATGACCTGTATACCCGACCACCCTGAAAGCGCAAGAATATAT  
CACCTTTGTAAGGAAAGATTCCGTAAGCAGCAGCTGGTCAATGTGGCGGACAAACCTGATCT  
CTGTGACTTTTTATTTTCGGCGCCAACCTGGAGATAGGAGACCCTACAGATTCTGATCTCTA  
CCAACGGCCTTTCTCCGCGCTTTGGCGCTCTAGTAAGAGATGAGATCCGTAACCTATTACACA  
CAAATGGGGGATCTGGCGCTGGAGGACGCTGTCTGTCAAACTAGGTGAGCTGAGAAGAGGAAT  
TAGGCTGCTGGCACCAGACGACAAGGATGTCAAGTACCGCATGGATTGGGCCAGACGCTGCA  
CAGACCTTTCGGCATTTCAGCACTGCCACAACATCGACGTAACGCTCTGCTGGATCTTTTC  
AAGGTCATGTTTCAAGAACAAGAACTGTTCTTGCAGTTCCCTCCCAGAGAACGGTTGCTTAG  
CGAGTACTGCTCGTCTTGA

>YLR101C 1.67 Hot

ATGCCTTTTTTGCTTTCACGTGTATATATATATCAGTTGATATGCGTTTTTCTATACAGACATACA  
TGTATATACACACATATATATATATACATATGTACGCAGAGATATATTAATGGGGGTCTA  
GTTTCAACAATTTGATCTTTCAGTTTCTCGTCCCATTCCAGTTTCTTCTTCTGTATATAAGC  
GAAGACATCAGACATTCCAGTAGGGTCTATTTCTGCGTCTTGATATATGGCATAACCATCCC  
TAGAGGTAGCAGAACCCTATTTACGTCTTGTCTCAAAGTTTGGATTGGCCAATCTAGTT  
ACGTATACTGGGGCATTGGCAGCTTTATAACCATCAATATTTGTGCCATGGAGACCCCAACAG  
CCTGGCCAATAGAACAAGCATAG

>YCR076C 1.5 Hot

ATGATTGAGAATAAGGTTGAACTGGTAGCAGAAGTGTGTTGGAGTCCATCGGTAAAACCTGA  
GGTGGTGTACGCCATACAGAGGGAACCAAATCATGCCAAGTGAGTTTTTCGCATTAAGATT  
CTCCAGTGAGAAGGGTTCAACATCGTTTTCTCTCTGAGCTAGTGGTGATTCAGACTCTGGAT  
GACAATGACAAGTATACTGTTGTTATTTCGTCATGGTACGTCGATCACCATGGCATGTGTGGT  
GGGTTACAGCGATTTTAAATTGCCACAGAATTGAAATGGCCACTAGAAAAGAGAAAGCTTAC  
CTGTGGAGCCAGACCTGAAACCTATAATGACACAACCTAAAAGACAAAACCTGCAGGTAGTGC  
GACATGCCAAAATTTGACGATGAGTACCAGGCACAAGCAAGACAAAACCAGGGAACAGCACC  
GTTGAACCCATATCCCGGACTTACGGTAACTGAACCGAGCTTCGCTAACCCAGCAGGAGGGT  
ATGCGGATGGTGATCTGTATCCTGTTGGCACAAGCCATCCGGATTGGTCTGGAGGGCTTCCC  
AATCCTCTGGGGAATCCAAGTAGCCAAGGCGGTATGATTTTTCGATCCAAATAGAAGACCTGC  
CCCAAGACGGGAAGATATGCCGCCAGGATGGATGCCTGGATCCAAGTACGACGAACCATTTG  
GTCTGGATCTGGCGGATTTGGAGGTTTCCAGGATCCGGCGGATTTGGAGGGTCAGGATCTGGC  
TTTATTTAA

>YDR125C 1.77 Hot

ATGCTTTTTAATAAAGAGGTACTTGATGGACCTGAAAGTTTAAGGAGGCAGATAATGAATGT  
ATATAAATGTTACATGTGGAAGAGAGCGTTCCACAGTAATAGAAGCCTACTGGAAGTTAAAC  
GTCTGTAAGAGAGTCTCCAGAGAAAAATTTTGGAAAGGATTTCTTAGACCCAAGGAGGAAAAAT  
GCTGTCAAAAAATCTGGATTCAAGCTATGGTCAAGCCATTTGAATAACCCACACAAAACCTTA  
TATGCGGCTGGAGGAATTACAGAGACGTATTATGGAAGAGGTACACGTTGAAGGTATTTAAA  
AGAATGATAAGTTATTCAACGAAATAAATCAATGGCATTTCAAAATGAAAACACAAGTACT  
GTTGGAACACCAACATTGCTGATACATGGCTATGCCGCATCTTCAATGTCTTTTTTTCAGAAA  
TTATCCAGGTCTGTCCAAGCACATCCGAAATTTATACTCAATTGACATGCCAGCGAGCGGAT  
TGTCTTCAGTACCGTCTTTAGAGATCAATACAACAACACCTCTGCCGTTAGATATCAAAATTT  
ATTGGAGAAAATAAATTTAAGGTTCCATATACAATAAATGCAAATCACAATAAATTTGTGAT  
TCAAATGTACGAAGATTTCTATCTCGACAGAATCGAGCAATGGCGCATTGATAACAAATTTGG  
GCAAATGAATGTTGTGGGGCATTTCTTTTGGCGGATATTTATCTTTTAAATATGCTGTTAAA  
TATCCAAACTCGGTAAACAAAACCTTTGCTTGGTATCCCCACTAGGAGTGGAAGGAATATCTG  
GTCTGTAAATAAATAATTTCCACTCCAACACTCTTTATACTATCGATTTTAAAAATCCAAATTT  
CCAAGTTTTACTCCAAGAAATATGATTCCAATAACTTATTTGAACAACAATTTTCACATT  
TTGAGAATGATGGGACCATTAGGAGCTAAGTTATGTTGGAATTACATAATGGCGGCATATAG  
CCGAGTCCCATCGTTGGCATAACAAGAGTACATATTTGAACTGTTTTACGGTAAGGGAGGTA  
TACCGGAGGTTACGACAGATATTTTCAAAGCGTTATTTTCAAGATGTATCCTAGCAAAGGAC  
CCCTTGATGGATTCTCTGCAATATTTAAATGTTAAGAAATTTATTGATAGTATATGGGCAATA  
TGATTGGATGAATAAAAAAGCCGGTATGTTTCATGGTCAAAGAGTTGAACAATTTAAAGA  
ACTGTCTAGAAGGAGCAAGTTATTTAGAAATACCTTCTTCCGGTCACAATCTTTTTTTTAGATAAC  
CCAGAATCATTCAACCAATCTATAGTGTCTTCTTATCAGACGAAACTAAATCGCCTTGA

>YPL049C 1.82 Hot

ATGGCCGTATCAGCCCCTTTGAGAACGACTGCCGAGGATACATCCATTGCTAAATCAACACA  
AGATCCAATTTGGTGATACAGAAATCAGTGTAGCAAATGCTAAGGGCAGCAGCGATAGCAACA  
TTAAGAATTCGCCAGGCGGAAACAGCGTTGGTTCAGGAGTCGGAGCTAGAGCATGTCCCTGAG  
GAGGATGACTCTGGTGACAAGGAAGCAGATCATGAGGATCTGAGACAGCCACTGCGAAGAA  
GAGGAAAGCCCAACCATTGAAGAATCCGAAGAAATCATTGAAGAGGGGCAGAGTCCCAGCGC  
CTTTGAATTTATCGGATAGCAACACTAATACACACGGTGGTAATATTAAGGACGGCAACTTG  
GCTTCGTCTAACTCTGCACATTTTCTCCTGTTGCTAATCAAACCGTGAAGAGCGCGCCCGC  
ACAAGTTACTCAGCATTCCAAGTTCCAGCCCCGTGTCCAATACTTGGGAAAGGCCAGTTCTA  
GACAACTATAACAAGTGAATAATAGCAGCAATAGTTATGGGAAACCACACATGCCCTCGGCG  
GGCATCATGAGCGCCATGAACCCTTACATGCCCATGAATCGCTACATAATGTCACCATATTA  
TAATCCGTACGGTATCCCTCCACCTCACATGCTGAACAAGCCCATAATGACACCCTACGTGT  
CGTATCCATATCCAATGGGACCGCGGACCTCCATTCCTTATGCTATGCAAGGTGGCAACGCT  
AGGCCCTACGAAGAAAATGAGTATAGTGTAGCAATTACAGAAACAAGAGGGTTAACGACTC  
ATATGATTCGCCCTTTGAGTGGCACCCTTCCACTGGGAAAACCAGACGATCCGAGGAAGGCT  
CAAGAAATTTAGCGTAGGATCAAGTGCGAATGCCGGTCTACGCAACAGCGCGGGATCTA  
CGCCAGCAGATATGATACCTGCTGAAGAATACCACTTTGAACGGGATGCATTACTCTCGGC

CAACACGAAAGCCAGAAGCGCAAGCACAAGCACAAGTACAAGCACAAGCACAACCCGGGACA  
 GGAGTTCATGGCATGAGGCAGAACCCAATAAAGACGAAGAAGAGGGTACGGACTTGGCCATC  
 GAGGACGGAGCGGTCCCCACTCCACTTTTACTACGTTCCAGCGGACCTCGCAGCCGCAGCA  
 GCAATCACCTAGTCTTCTTCAAGGCGAAATCCGACTCTCATCGCATATTTTTGCCTTCGAGT  
 TCCCCCTGAGCTCTAGCAATGTAGACAAGAAAATGTTTATGAGCATATGTAATAAAGTATGG  
 AATGAATCAAAGGAGCTGACAAAAAATCATCATCACATCACAGAACC GGAAAATAG

>YHR181W 1.85 Hot

ATGCTGTTAGAATTGATTTCTTATGCAGGAACCGTTTCAGGGTTTCTTTTTTAACTTTTC  
 AATTGCATCGGGTTTATACTACATTAGTGAAC TTGTTGAAGAACACACAGAACC CACAAGAC  
 GGTTCCTCACAAGGGCTATTTATGGTATAATATTAATATTAATTCTGCTACTGTTACTAGAC  
 GGTTCCTCCGTTCAAACCTTACACTTTTTTCCATTGCATGTTACATAGTATATTACCAAACTT  
 AAAAAGTTTCCCATTTATTTTCGTTAACAGCCCAACTTTCTATTAAGCTGCGTATGTGTGG  
 TCTTGAATCACTACTTCTGGTTCAAATATTTAATGATACGGAAGTTCCCCACAGTTCAA  
 TTTGATCCAAATTATATAACCACGCAGACGTGCTAGTTTCGCTGAAGTAGCCTCATTTTTTGG  
 TATATGCGTTTGGTTCATACCATTTGCCTTATTTGTTTCTCTGTCTGCTGAGTGGTATTATGTGC  
 TACCAACGACTAGTGAGCAACATATGGCTAAGAAAAATGATGACATCACAAACGAACAACCAG  
 CCAAAATTTTCGTAAAAGGGCTGTTGGGTTAGTCTCGTGTAGTCATCAACTCGGTAAGGAAGTA  
 CATCTACTCTCTAGCCCGTGTATTCGGTTATGAGATAGAACCCTGACTTTGATAGATTGGCTG  
 TTTAG

>YDR037W 1.75 Hot

ATGCTCAACAAGATAATGTCAAAGCCGCGCTGAAGGTGTTGCTAACCTACATCTCGACGA  
 AGCTACCGGGGAAATGGTCTCCAAGTCTGAATTGAAGAAGCGTATCAAGCAAAGACAAGTCG  
 AAGCTAAAAAGGCCGCCAAAAAGGCTGCCGCTCAACCAAAACCGGCTTCCAAAAAACA  
 GATTTGTTTCGCTGACCTGGATCCATCGCAATATTTGAAACAAGATCTCGCCAAATTCAGA  
 ATTGAGAAAGACTCACGAACCAAATCCATACCACACAAGTTTCACGTTTCTATATCCAATC  
 CTGAGTTCTTGGCCAAATATGCGCATTGAAAAAAGGTGAAACCTTACCTGAAGAGAAGGTT  
 TCAATTGCTGGTAGAATTCATGCCAAAAGAGAATCTGGCTCCAAATTGAAATTCATGTTCT  
 TCACGGTGATGGTGTGAAGTTCAATTGATGTCCCAATTGCAGGACTACTGCGACCCAGACT  
 CTTACGAAAAGGATCACGACCTTTTGAAGGGGTGATATCGTTGGTGTGAGGGTTACGTC  
 GGAAGAACTCAACCAAAGAAAGGTGGTGAAGGTGAAGTTTCCGTTCTCGTTAGCAGAGTGCA  
 ATTATTGACACCATGTTTGCACATGTTACCTGCCGACCACTTTGGTTTCAAAGACCAGAAA  
 CCAGATACAGAAAGCGTTATTTGGATTTGATCATGAACAAAGACGCCAGAAACCGTTTATT  
 ACCGTTCTGAAATATCCGTTACATCAGAAGATTTTTGGACCAAAGAAAGTTTATTGAAGT  
 AGAAACTCCAATGATGAACGTTATTGCTGGTGGTGTACCGCTAAGCCATTTATTACCCACC  
 ATAATGACCTTGATATGGACATGTACATGAGAATTGCTCCAGAATTGTTCTTGAACAATTG  
 GTTGTGCGGTGGTTTGGATCGTGTTTACGAAATTTGGTAGACAATTCAGAAATGAAGGTATCGA  
 TATGACACATAATCCAGAATTCACCACCTGTGAGTTTTATCAAGCCTACGCTGATGTTTATG  
 ATTTGATGGATATGACTGAATTGATGTTTTTCAGAAATGGTCAAGGAGATCACTGGTTCTTAT  
 ATTATCAAATACCATCCGGACCTGCTGATCCAGCCAAAGA ACTAGAATTGAAC TTTTCTAG  
 ACCATGGAAGAGAATCAACATGATTGAAGAATTAGAAAAGGTATTCAACGTTAAGTTCCCAT  
 CTGGTGTATCAATTACATACAGCTGAGACTGGTGAATTTTTGAAAAGATTC TTGTGCGACAAC  
 AAATTAGAATGTCCACCTCCACTAATAATGCTCGTATGTTAGATAAGCTTGTGCGGTGAATT  
 AGAAGATACATGTATCAACCAACTTTTCATTTTTGGCCACCCTCAAATGATGTCTCCATTAG  
 CCAAGTACTCAAGAGATCAACCGGGTCTATGTGAGCGTTTCGAGGTCTTGTAGCTACAAAG  
 GAAATTTGTAATGCCTACACTGAATTGAACGATCCATTTGACCAAAGGGCACGTTTCGAAGA  
 ACAAGCTAGACAAAAGGATCAAGGTGATGACGAAGCTCAATTAGTCGATGAAACCTTCTGTA  
 ATGCTCTAGAATACGGTTTACCACCAACTGGTGGTTGGGGTTGTGGTATTGATAGACTGGCC  
 ATGTTCTTGACCGACTCCAACACCATTAGAGAAGTCTTATTGTTCCCAACTTTGAAGCTGA  
 TGTTTTGAGAGAGGAAGTCAAAAAGGAAGAAGAAAATTA

>YNL194C 1.52 Hot

ATGTCCTACAAAAGTTTGTGTACTTTATTAACCTTTTCTTCTACTAGGGGCTACATTGTT  
 GACTTTTTTTCTGATACTAGCAGGTGGCAGGACCACAGGAGTGTGAAGAATTTTTATTGGT  
 TTCAGGCATCCACTTCGGGCTTTAACTCGGCGCCCTCCGTAACCAGATGGTACAATTATAAC  
 TGGTGCGGCTGGGAAAGCCGCGGAATAGCAGTCAACTGCTCTTCTAAGATGGCAGCTCAGCC

GTTTTACCAAGGGACAACCTTTGGCAGTTCCCCCTCATGCCCTCAACTTTTTTAAACAACA  
 GAAATGCCTACTATTATCTTTCAAGAGTGGGCTGGGCAATGCTTCTAATCGGGCTTTTCTTT  
 TTGTTAATCACGTTAGTTTTCGGTTATTGCCAGTTTAATCAGATACAATAGACGTACCGCCGC  
 TCTGGCAACTGCAATGAGCTGGATCACGCTTTTCTTCATAACCCTATCCGCTTGTCTGTACA  
 CAGGATGTTACGCTAAGGCAGTAAAGGCGTTTACCATGAGAATCGTGATGCTAGACTAGGT  
 CCCAAGAATTTTGGGCTTATTTGGACCACAGTATTTTTGTTAATTGTAAACGCCATTTGCTG  
 TACTATCATGGTGGCTACTCATAAAAGAAACGAGTACATCTATGACCGCAGTTTTCGCTTCTA  
 CCAAGACAGTGGACTCACAACTCCAACCTCAGTTCCAACAAATGGAGGAATACCTTCCCTCG  
 GTGCCTGTAAGTGGGTTCCAACAATCTCAATCCCACCAGAATCATAGGTTCTTTAAGAAATT  
 GAGAACGAAAAAGAGAACTGTGACTAGCGCAGGCGATGAACCAGACCGGGTTCAAGAGGAAC  
 CGCTCTATACTGAACAGAATGTTCCCTGTTGTATCATAG

>YOR348C 2.09 Hot

ATGGTAAATATACTGCCCTTCCACAAGAACAATAGACACAGCGCGGGAGTCGTACCTGCGC  
 GGACGATGTTAGCGGCGACGGTAGCGGCGGCGACACCAAGAAGGAGGAGGATGTTGTCCAGG  
 TAACGGAATCACCATCGTCCGGGTCGCGCAATAATCATCGCAGCGACAATGAAAAAGATGAC  
 GCCATCCGTATGGAGAAAATATCTAAGAACCAGTCCGCGTCGTCCAACGGCACCATCCGCGA  
 GGATTTGATTATGGACGTGGACTTGGAGAAATCGCCCTCCGTCGATGGCGATAGCGAGCCGC  
 ACAAACTAAAAACAAGTTTTGCAGTCGCGCCATGTGCAACTGATCGCGCTGGGCGGCGCCATC  
 GGTACCGGTTTTGCTGGTGGGGACTTCATCCACGTTTACATACGTGCGGTCCGCGGGGGCTGTT  
 CATATCGTACATTATTATTTCCGCGGTGATCTACCCGATCATGTGCGCGCTGGGCGAAAATGG  
 TGTGCTTTTTTGCCGGTGATGGTTCTGACAGTGCCGGGTCGACGGCCAATCTGGTCACTAGG  
 TACGTTGACCCTTCGTTGGGCTTCGCCACTGGGTGGAATTACTTCTACTGCTACGTCATTTTT  
 AGTGGCCCGCGAGTGTACGGCGGCATCCGGTGTGGTGAATACTGGACCACCGCGGTTCCCA  
 AGGGCGTTTTGGATCACGATCTTTCTATGCGTGGTTGTTATACTAAACTTTTCCGCGGTCAA  
 GTGTACGGCGAATCCGAGTTTTGGTTTCGCGTCTATCAAGATATTATGCATTTGTGGGACTGAT  
 CATTCTGTCTTTATTTTTGTTTTGGGGTGGTGGCCCAACCATGACCGTCTTGCTTCAGAT  
 ACTGGCAACATCCGGGCGCTTTTGCGCATCACCTCACGGGCGGATCGCTGGGTAACCTCACA  
 GATATCTACACTGGGATTATCAAGGGCGCCTTCGCCTTCATCTTGGTCCGGAACCTGGTGTG  
 CATGACTTCCGCGGAATGCGCGGACCAGCGTAGAAATATCGCTAAGGCTTCGCGCCGCTTTG  
 TATGGAGACTGATCTTCTTCTACGTTCTGGGGACGCTGGCCATCTCCGTTATTGTTCCATAC  
 AATGACCCAACATTTGGTAAATGCGCTGGCGCAGGGCAAACCGGGAGCCGCTCGTCAACCTT  
 TGTGATCGGAATTCAAAACGCCGGGATTAAGGTTCTTCCCCACATTATCAATGGGTGTATCT  
 TGACCAGCGCGTGGTCTGCCGCCAATGCGTTTATGTTTGCAGACGAGATCACTGTTGACC  
 ATGGCGCAAACGGGACAGGCACCCAAATGTTTGGGCAGAATCAACAAATGGGGTGTTCATA  
 CGTGGCTGTGGGTGTTTTCTTCTTGTGTTCTTGTGTTGGCATATCTGAACGTGTCTTCATCCA  
 CGGCAGACGTGTTAATTGGTTTTTCCAATATCAGCACCATTTCGGGTTTTCTGGGCTGGATG  
 TGCGGCTGCATCGCGTACCTGAGATTCGCGAAGGCTATTTTCTACAATGGCCTCTACGACAG  
 ATTGCCTTTTCAAGACGTGGGGACAGCCTTACACCGTGTGGTTCTCTCTCATTGTTATAGGCA  
 TCATCACCATTACCAACGGGTATGCCATTTTTCATCCCTAAGTACTGGAGAGTAGCAGATTTT  
 ATTGCTGCCTACATCACCTACCCATCTTCCCTGTTTTGTGGTTTCGGCCATAAGCTGTATAC  
 TCGGACGTGGAGACAATGGTGGCTCCCTGTGTCCGAGATCGATGTTACTACAGGGTTAGTCG  
 AGATCGAGGAGAAATCAAGAGAAATTGAGGAGATGAGATTACCCCCACCGGTTTTCAAAGAC  
 AAGTTCTTGGACGCCTTGTGTAA

>YCL033C 1.85 Hot

ATGAATAAGTGGAGCAGGCTGTACGTTATAACTGTACGCAGGACTTTTCCAGGGAGAAGAAA  
 CATTGTAAGTACGACGACTGGAATAAGAGCAAGAAAATGAGTGACGAATCGAATGACGTGA  
 AGTGAACGATGCCCTGACACCATTGCAGCTGATGGTGTGAGAGATAAGGCCACTGAAAGG  
 CCCAACACCGGTGCGTATTTACACACCAACGAGTCCGGTGTCTACCATTGTGCCAACTGCCA  
 CAGACCGTTGTATTCGAGCAAGGCCAAGTTCGACGCTCGTTGTGGATGGCCCCGATCTACG  
 AAGAGGTATCCCTGGAGCCATCACATATCATCGTGACAATTTCTTAATGCCTGCGAGGGTG  
 GAGATATGTTGTGCAAGGTGTGGTGGACACTTGGGACATGTGTTTGAAGGTGAAGGCTGGAA  
 ACAGTTGCTAAACTTGCCCAAGGACACCAGACACTGTGTGAACAGTGCCTTTTAAACCTCA  
 AGAAGGATTAA

>YNL055C 3.79 Hot

ATGTCCTCCTCCAGTTTACAGCGATATCTCCAGAAATATCAATGACCTATTGAACAAGGATTT  
 CTATCATGCTACCCAGCTGCCTTTGATGTGCAAACAACAACCGCCAATGGCATTAAAGTTCT  
 CATTGAAGGCTAAACAGCCTGTCAAAGACGGTCCACTGTCTACTAACGTGGAAGCAAAGTTG  
 AATGACAAGCAAACCGGCTTGGGTCTAACTCAAGGCTGGTCTAACACAAAACACTTGCAAAC  
 CAAATTAGAGTTTGCCAACTTGACCCCTGGTCTAAAGAACGAATTGATCACTTCTTTGACTC  
 CAGGCGTCGCCAAGTCCGCCGTCTTAAACACTACGTTACACAAACCTTCTTCCACCGCAAGA  
 GGTGCCTTTGACTTGTGTTTGAAGTCACCAACATTTGTTGGTGACTTAACTATGGCCACGA  
 AGGTATTGTTGGTGGCGCAGAGTTTGGTTACGATATCAGCGCCGGTCCATTTCTCGTTATG  
 CCATGGCTTTAAGTTATTTGCGCCAAAGACTACTCCTTGGGCGCTACATTGAACAACGAGCAA  
 ATAACTACCGTTGACTTCTTCCAAAACGTCAACGCCTTTTTACAGGTCCGGTGTAAAGGCTAC  
 AATGAACTGCAAACCTAACTCCAATGTCAACATCGAATTCGCCACTAGATATTTGCCTG  
 ATGCATCTTCCCAAGTTAAGGCTAAGGTGTCCGATTCCGGTATTGTCACTTTGGCTTACAAG  
 CAATTGTTAAGACCTGGCGTCACTCTGGGTGTCCGGTCTCTTTCGATGCTTTGAAGTTGTC  
 TGAACCTGTTACAAGCTAGGTGGTCTTTGTCCTTCGACGCTTGA

>YDR233C 2.67 Hot

ATGTCGCGCTCAGCTCAACATAGCCAAGCCCAACAACAACAACAACAAAAAGCTGTAATTG  
 CGATTTGCTATTATGGAGGAACCCTGTTCAAACCGGTAAATATTTCCGGTGGGTCTCTGTTAG  
 CCTTGTTAATTTTGA AAAAAGTTAACTTGATCACTTTCTTTTTTGAAGGTTGCCTACACTATC  
 TTATTACAAACAGGATCTATTGAATTCGTATCCAAGCTCTTTTTTGGGACAAGGTTAATCAC  
 CAAGTATGGTCTTAAAGAATGTCCAAATATCGCCGGCTTTATTAAGCCTCATATCGATGAAG  
 CTTTGAACAGCTACCAGTCTTCCAAGCCACATAAGAAAAGACTGTATTTCGCTCAAGTCCCT  
 AAGCACACTTTCAAGACCGCTGTTGCCTTATTTCTACTACACAAATTTCTTCTCCTGGTTCTC  
 TATCTGGACCATCGTCTTTGTTGCTGACATTTTTTACCTTCACTTTGCCAGTTATCTACCATT  
 CCTACAAGCATGAAATTGATGCTACTGTGCTCAAGGTGTAGAAATTTCTAAGCAAAAAGACC  
 CAAGAGTTTTCTCAAATGGCTTGCGAAAAGACAAAACCATACTTGGACAAGGTTGAATCTAA  
 ATTGGGCCCAATTTCCAACCTGGTCAAATCTAAGACTGCTCCTGTGTCTTCTACTGCCGGTCTC  
 CTCAAACCGCCAGCACTTCTAAGTTGGCCGCTGATGTTCCATTGGAACCAGAGTCTAAGGCT  
 TACACATCTTCAGCTCAAGTTATGCCAGAAGTTCACACAACACGAACCTTCCACTACCCAAGA  
 ATTTAACGTGATGAATTGCTAATGAATTGAAGAAAAGTACAAAAACTTGCAAAATGAAT  
 TGGAAAAACAACGCTTGA

>YJR058C 2.27 Hot

ATGGCAGTACAGTTTATACTGTGCTTTAATAAGCAGGGTGTGGTGCAGGTTGGTGGAGATGGTT  
 CGATGTACACAGTTCGGATCCTCAGCGTAGCCAGGATGCCATTGCGCAGATTTATAGACTCA  
 TATCTTCCAGAGATCATAAGCATCAGAGTAAC TTCGTAGAGTTTTCCGATTCGACGAAACTC  
 ATATACAGGAGGTATGCGGGTCTGTATTTTTGTGTCATGGGTGTGGACTTACTTGCAGATGAACC  
 CATATATTTGTGCCACATCCATCTGTTTGTGGAGGTGCTAGATGCATTTTTTCGGCAATGTCT  
 GTGAACTGGATATCGTATTCAACTTTTTACAAAAGTCTATATGATAATGGACGAGATGTTTATT  
 GGAGGGAAATACAAGAAATTTCAAAGGATATGCTGTTAGAAAGACTAAGTATTTTAGATAG  
 ACTAGACTAG

>YJR016C 2.13 Hot

ATGGGCTTGTTAACGAAAGTTGCTACATCTAGACAATTTCTCTACAACGAGATGCGTTGCAAA  
 GAAGCTCAACAAGTACTCGTATATCATCACTGAACCTAAGGGCCAAGGTGCGTCCCAGGCCA  
 TGCTTTATGCCACCGGTTTTCAAGAAGGAAGATTTCAAGAAGCCTCAAGTCCGGGTTGGTTCC  
 TGTGGTGGTCCGGTAACCCATGTAACATGCATCTATTGGACTTGAATAACAGATGTTCTCA  
 ATCCATTGAAAAAGCGGGTTTTGAAAGCTATGCAGTTCAACACCATCGGTGTTTCAGACGGTA  
 TCTCTATGGGTACTAAAGGTATGAGATACTCGTTACAAAAGTAGAGAAATCATTGCAGACTCC  
 TTTGAAACCATCATGATGGCACAACACTACGATGCTAACATCGCCATCCCATCATGTGACAA  
 AAACATGCCCGGTGTCATGATGGCCATGGGTAGACATAACAGACCTTCCATCATGGTATATG  
 GTGGTACTATCTTGCCCGGTCACTCAACATGTGGTTCTTTCGAAGATCTCTAAAAACATCGAT  
 ATCGTCTCTGCGTTCCAATCCTACGGTGAATATATTTCCAAGCAATTCCTGAAGAAGAAAG  
 AGAAGATGTTGTGGAACATGCATGCCAGGTCCCTGGTTCTTGTGGTGGTATGTATACTGCCA  
 ACACAATGGCTTCTGCCCGCTGAAGTGTAGGTTTTGACCATTCCAACCTCCTTCTTCCCTCCCA  
 GCCGTTTTCCAAGGAGAAGTTAGCTGAGTGTGACAACATTTGGTGAATACATCAAGAAGACAAT  
 GGAATTTGGGTATTTTACCTCGTGATATCCTCACAAAAGAGGCTTTTTGAAAACGCCATTACTT

ATGTCGTTGCAACCGGTGGGTCCACTAATGCTGTTTTGCATTTGGTGGCTGTTGCTCACTCT  
 GCGGGTGTCAAGTTGTCACCAGATGATTTCCAAAGAATCAGTGATACTACACCATTGATCGG  
 TGACTTCAAACCTTCTGGTAAATACGTCATGGCCGATTTGATTAACGTTGGTGGTACCCAAT  
 CTGTGATTAAGTATCTATATGAAAACAACATGTTGCACGGTAACACAATGACTGTTACCGGT  
 GACACTTTGGCAGAACGTGCAAAGAAAGCACCAAGCCTACCTGAAGGACAAGAGATTATTA  
 GCCACTCTCCACCCAATCAAGGCCAACGGTCACTTGCAAATTCTGTACGGTTCATTGGCAC  
 CAGGTGGAGCTGTGGGTAATAATTACCGGTAAGGAAGGTACTTACTTCAAGGGTAGAGCACGT  
 GTGTTGCAAGAGGAAGGTGCCTTTATTGAAGCCTTGAAAGAGGTGAAATCAAGAAGGGTGA  
 AAAAACCGTTGTTGTTATCAGATATGAAGGTCGAAGAGGTGCACCAGGTATGCCTGAAATGC  
 TAAAGCCTTCCCTCTGCTCTGATGGGTTACGGTTTGGGTAAAGATGTTGCATTGTTGACTGAT  
 GGTAGATTCTCTGGTGGTTCACGGGTTCTTAATCGGCCACATTGTTCCCGAAGCCGCTGA  
 AGGTGGTCTTATCGGGTTGGTCAGAGACGGCGATGAGATTATCATTGATGCTGATAATAACA  
 AGATTGACCTATTAGTCTCTGATAAGGAAATGGCTCAACGTAAACAAAGTTGGGTTGCACCT  
 CCACCTCGTTACACAAGAGGTACTCTATCCAAGTATGCTAAGTTGGTTTCCAACGCTTCCAA  
 CGGTGTGTTTTAGATGCTTGA

>YLR229C 1.55 Hot

ATGCAAACGCTAAAGTGTGTTGTTGTCGGTGTGGTGTGTTGGGAAAACGTGCCTTCTAAT  
 CTCTTATACAACGAATCAATTTCCAGCCGACTATGTTCCAACAGTGTTCGATAACTATGCGG  
 TGACTGTGATGATTGGTGTGTAACCATATACGTTAGGTTTGTGTTGATACGGCCGGTCAAGAA  
 GATTACGATCGATTGAGACCTTGTTCATATCCTTCTACTGATGTATTTTTGGTTTTGTTTCAG  
 TGTATTTTTCCCCACCCTCTTTTGAACCGTTAAAGAAAAATGGTTCCCTGAAGTACATCACC  
 ATTGTCAGGTGTACCATGCCTGGTTCGTCGGTACGCAGATTGATCTAAGGGATGACAAGGTA  
 ATCATCGAGAAGTTGCAAAGACAAAGATTACGTCCGATTACATCAGAACAAGGTTCCAGGTT  
 AGCAAGAGAAGTGAAGCAGTAAAATATGTCGAGTGTTCGGCACTAACACAACGCGGTTTGA  
 AGAATGTATTTCGATGAAGCTATCGTGGCCGCCCTTGAGCCTCCTGTTATCAAGAAAAGTAAA  
 AAATGTGCAATTTTTGTAG

>YDR246W 1.91 Hot

ATGGCCATCGAAACAATACTTGTAAATAAACAAATCAGGCGGACTAATCTATCAGCGGAATTT  
 TACCAACGACGAACAGAAATTGAACAGCAATGAATACTTAATTTCTTGCTAGTACACTGCACG  
 GTGTATTCGCCATCGCGAGCCAGCTGACTCCGAAGGCATTACAGCTAACTCAACAAACGAAC  
 ATCGAAAATACCATCCCATATATACCTTACGTGGGCATGTCCAGCAATAGGAGCGATACAAG  
 AAATGGAGGTGGCAATAACAACAACACACTAATAATGAAAAACTGGGCAGTTTTTAAAGGAG  
 ATGATTTTTTCAAAGAACCATTTACGAACTGGAACAAGAGCGGATTGAGACAACCTATGCACG  
 GATCAGTTCACGATGTTTATATATCAGACCCTAACCGCCTGAAGTTTGTGCTATCAGCTC  
 CAGCGTCATGCCCCAGAGACAGCCAATATAGCCACCACCGACAAGCCTGACCGACCCAAGA  
 GTACATCCAATTTGGCCATCCAAATAGCCGACAACCTCCTAAGGAAGGTTTACTGTTTGTAT  
 AGTGACTACGTATGAAAGACCCATCTTACTCAATGGAAATGCCTATAAGATCTAACCTGTT  
 CGACGAAAAGTCAAAAAATGGTAGAAAACCTACAATAG

>YOR229W 1.83 Hot

ATGGCGAAAAGCAAATCCAGTCAGGGTGCAGTGGAGCACGCCGTAAACCGGCACCTTCTTT  
 ATACCAACACATTTCTAGCTTTAAACCACAATTCAGCACAAGAGTCGACGATGTTTTACATT  
 TTAGCAAGACACTGACATGGAGAAGTGAGATTATTCCAGACAAATCCAAGGGCACCTTGACG  
 ACTAGTCTTTTATATTCTCAAGGTAGTGATATTTACGAAATAGACACTACTTTACCATTAAA  
 GACATTTCTATGACGACGACGACGACGACGACAACGACGACGACGACGAAGAAGGTAACGGCA  
 AGACGAAGTCTGCAGCCACCCCAAATCCAGAGTATGGTGTGCTTTCCAAGATGTTGAGGGG  
 AAACCATTGCGCCCAAAGTGGATTTACCAGGGCGAAACAGTGGCAAAAATGCAATACTTGGGA  
 AAGCTCAGACGACAGTACGGCGATCGCGATGTCCAAGAACGGCTCTTTGGCATGGTTCAGAG  
 ATGAGATCAAGGTTCCCGTTCATATCGTACAGGAAATGATGGGCCCTGCTACTAGATACTCT  
 AGTATTCACTCTCTAACCCAGACCAGGTTTATTAGCAGTGTGAGATTTTGTGTTGTCGACAAA  
 TATGGATACGGTAGTAAAGTCAAAAGTAACGGCTACGAGGAGGACAGCATCTTGAAAATCA  
 TCGACAACCTCCGATAGACCGGGAGATATATTACGTACAGTGCACGTTCCAGGGACCAACGTG  
 GCTCACTCAGTTAGATTTTTTAAACAACCATTTATTTGCATCTTGTTCAGATGACAACATTTT  
 AAGATTTCTGGGACACAAGAACAGCGGACAAACCGCTTTGGACGCTAAGCGAACCAGAAAATG  
 GACGACTAACGTCCCTCGATTCTCTCAAGTACTGAAAACCTATTTGTCACTGGGTTTCAGC

ACGGGTGTCATCAAGCTATGGGATGCGCGTGCTGTGCAACTGGCTACTACTGACCTCACACA  
 TAGGCAGAACGGCGAGGAACCGATCCAAAACGAAATAGCCAAGTTGTTCCATTCTGGCGGCG  
 ATTCCGTTGTCGATATCCTGTTCTCACAAACCTCTGCAACAGAATTTGTTACGGTTGGAGGA  
 ACGGGTAATGTCTACCACTGGGACATGGAGTACTCTTTTTCAAGAAACGACGATGACAACGA  
 AGACGAAGTTCGAGTGGCTGCTCCGGAGGAACCTCAGGGTCAATGTTTAAAATTTTTCCACA  
 CAGGTGGCACAAGAAGATCGAGCAACCAATTCGGGAAGAGGAACACTGTGGCGCTACACCCC  
 GTAATCAATGATTTTGTGGCACTGTTGATTCAGATAGTCTTGTACTGCCTACAAACCATT  
 TCTGGCCAGTGACTTCATTGGCAGAGTTACGACGATTAA

>YLR316C 1.65 Hot

ATGGTTAAGAAAAGTTAATAATCCGCTAAAAATCGATTATCAGAACGGGATAATAGAAAATCG  
 GCTTCTGCAAATTAGAAATTTCAAAGATGTAAATACGCCCAAATAATCAATGTATGGAGTA  
 TAAGAATAGATCCAAGAGACTCGAAGAAAGTAATAGAGCTAATTCGAAACGATTTTCAGAAA  
 AATGACCCTGTTTCATTGAGACATTTGAAAAGGATCCGCAAGGACATCGAGACCTCCACCTT  
 GGAAGTGGTGTGTGTTGCGAAAAGATATATTTGCGACGAAGGTGAAATAAACAATAAAATGA  
 AGAGTATTTGGGTTGGAACGAAAAAGTATGAACTGAGTGATGATATCGAAGTGCCTGAGTTT  
 GCGCCCAGCACAAAGGAACTGAACAATGCCTGGTCTGTGAAGTACTGGCCGTTGATTTGGAA  
 CGGCAACCCCAATGATCAAATATTGAACGACTATAAAAATAGACATGCAGGAAGTACGAAATG  
 AGCTATCGCGTGCCTCGACGTTGTCTGTGAAGATGGCAACGGCAGGAAAACAGTTTCCAATG  
 GTGAGCGTCTTTGTTGACCCATCAAGAAAAGGACAAAAGTGGTGGCAGAAGATGGCAGAAA  
 CTGCGAAAACCTCGCTACCCATCGACCACAGTGTAATGGTGGGCATCCGTGCGGTAGGCGAAA  
 GACTCAGGGAGGGTGTAGACGAAGACGCAAACCTTATCTGTGTCTTGATTACGACGCTAT  
 TTGACCCATGAGCCGTGCTCAATGTGCTCCATGGCCCTGATCCATTCTCGTGTGAGACGAGT  
 GGTCTTCCTTACAGAGATGCAGCGCACCGGGAGCTTAAAAATTAACGAGTGGTGACGGGTACT  
 GCATGAACGATAACAAACAGCTAAACTCAACATACGAAGCCTTTCAATGGATCGGCGAGGAA  
 TATCCTGTGGGCGAGGTTGACCGGGATGTCTGCTGCTAG

>YIL100W 2.07 Hot

ATGTATATATATGTTGAAGTGTGTACACACGTACACGCACAAGCTACAGACGCCACGCGGCC  
 CGGCATTCATATATGTACATACATTTATGCACATATATATATATATATATATATATATATGTA  
 ATGTATATATACAGCTTGTGATTTTCGCGCGCCGAATGGGCTGAAAAGCACAGTATAGTGGAG  
 AAGAAGAGAGAGGAGAAGGGGAGAGGGGCAATAGCAATGGATGTGGTAGAATACAGGGGAAGG  
 CCAAGCTGTTGTTCAATGGATGCGGTTTCGAGGCCAGCGCAAGGGGGGCGCTTCGAAGCATA  
 GAACATTATCCGCGGAAACGGGTATTAGGGGTGAGGGTGAATAA

>YEL039C 1.79 Hot

ATGGCTAAAGAAAGTACGGGATTCAAACCAGGCTCTGCAAAAAAGGGTGTCTACATTGTTTAA  
 AACGAGGTGTCAGCAGTGTCAATAAGAAGAGGGTGGTCCTAACAAAGTTGGACCTAATT  
 TACATGGTATTTTTGGTAGACATTCAGGTCAGGTAAAGGGTTATTCTTACACAGATGCAAAC  
 ATCAACAAGAACGTCAAATGGGATGAGGATAGTATGTCCGAGTACTTGACGAACCCAAAGAA  
 ATATATTCCTGGTACCAAGATGGCGTTTGCCGGGTTGAAGAAGGAAAAGGACAGAAACGATT  
 TAATTACTTATATGACAAAGGCTGCCAAATAG

>YJL100W 2.56 Hot

ATGAGTAACGAAGCTTACCAGCATGATCATAACCGTAAATCCTCACCAGAAGATAGTTGTGAA  
 CAGCTACGATTGGTTACAGTTCCGTGATGAGCAAGATCACTGTAAGTAAGAACCCGATAA  
 CGCACGCTTCTCCAGGGGTCGGTTTCGAATGCACAGAATTCAGACATAGCGGAGGCCCTCAG  
 GTATTCCACCCCTTCCATCAATCTCTGGTCAACGTACCGTCCGAGAGCCCAGACCTGATCA  
 GACTTCAGGGTCCAATCCTGCCGTTGGACTGCTTCATAATGCAGAGGACAAAGCGTCAGGGC  
 AAGAAGAAGAAGGAAGTCAATATGAGATTCAATATTCCGGTATTTTCGTCGCTGCATGCATAT  
 CCAACCAAGGGCCTAGCATATGAGCAGCTCCGAAGAAAAGAACAAGAACAGAGGGAAAA  
 CTTCAACCATTTGGTTTCTGACTGTATTGAGGCTGTAGAGACATTTGGACGCGAACTCGAGA  
 GAATCCAAACTGGCTCAAGTGGGTCGTAATTTGTGTATGGAACACGGGCCGACGAAAGCGTT  
 CCGGTGGGGGCTTCAAGCCCAAGGATGAGGAACCATATGGCCATTTTCTCCAAATGGAC  
 CAAATGGGCACACCGCACGTTTTTCCCATGTCTGTTTGGCAGAAGTTGTCTGATTCCAAACC  
 TCGGGTACATCTGTGAAAGTGCGGCTAGTTTGTGGATAGGCGACTGGAAACGCATCTAGTA  
 CCCTATACAGATACTGCATCTATAGAGTCTTTAATTTTTTATGATAATAGAAAAAATGGGT

ATTGGGATACAACCTTCAGAAGAAGAAACAAAAAAGCTGGGTCTTTCCAACTTTTTTTGA  
 AGGAGTACATCAACGCCGATGAGTTCTTTCATAAATACCCATTACCTGGGATGTATTTCAGAT  
 GTTAAACATTCATTTTCATCGTAAGTCATCCGGCGAAGATATCAATCATAAACCAGAGACAAC  
 CAGGAACCTAACAGATGAGACAGAACCGTCCAAGCAAATAAATTCCTCTCCAATTTTCGACGG  
 AATCTGAAGAAAAATTCGAAATTTGAATGGACAGAATCAAGTTTGAGTCAGTTTCAGATTGGAA  
 CTAGAAAACTAATTTATCCTTGATTATATAATGAGAAACACAGATAGAGGTCTAGACAATTG  
 GATGGTGAACCTAATCAAACCTTCAAAACAATAAGTGGAGACTCAAGTTAGCCGCCATCGACA  
 ATGGGTGTCTCTTCCCTGGAAGCATCCTGATGAGTGGCGTCTGTACCCATATGGCTGGTTG  
 TATTTGCCTCTGCAACTACTAGCCAAACCATTTTCTGAGCAAATGAGATCTCATTTCCTACC  
 GATATTGACAAGCACTAATTGGTGGGAAGAGTCGTACCAAGAATTCTTGGCCCTATTTAGCA  
 GGGACCAAGATTTTAACGTCCGAATGTGGAAGAAGCAATGGGCAGTATTAAGGACAGGCG  
 TTCAACGTTGTGCGAAACATTGAAAGACCCACGACAAGGCCCTTGAATTTGGTTAGAAGGAC  
 AAGGTGCCAGGTAATAGATGAGAAGATGCAAGTTCCCTGTTGCCACCTCCAGTTTCTATTT  
 TCAAAAACGCCATAGACGAACCTATTGGATCATATCCACTTCACCAATGGTACTCCCTAGC  
 ACCCAAGCACAATTCATTTTCATGCACATAACCAAGCAATAGTAATCCTGTATACTATGA  
 TTCCACTCTGCACCCATTTGCTAATAAAAACAGTGATAGCAGAGCGGCTACAAATAGTCAATT  
 CCACCCCGTATTCACCTGGTGTGA

>YMR295C 1.5 Hot

ATGATGCATTTTAGAAAGAAAATCCAGTATCAGTAACACGAGTGATCATGACGGAGCGAACCG  
 TGCTCAGATGTCAAGATTTCTGAAGATGACAAGGCAAGATTGAAGATGCGTACTGCTTCCG  
 TTGCTGATCCTATTCTAGACGCTGTGCAGGAAGCCCAACCTTTTGAACAAGCTGCTGATACC  
 TTCCACGACAACATGAACAGACAATCTTATTTTCCAACGAAGAAGGTCATGTTCTGTGTGA  
 TGTTTTCGGTCAACCCATCACACAGGCAGATATATCGAATCCAAGTGGGCAAGAGACGAAA  
 GACCTTTGGACACTATAAGAAGTTTCGAGTATGCTGTCTCCGGAGACCCGGTCTGGGCCCAA  
 CAGTTGGAGACTCCAACCTTACGGGTTCCGCGTAAGACCTGATTTCCCTGTGTTTGGTGTGC  
 TGTGACTTACGATGCGAACGGTATGCCACAGCAAGTGGGTGGTCTTCCAGTCAAATGTATG  
 GTGAACAAGCAGTGTATCAGCCACAACAACACGTACAGACTGAGGAAAAGCAAAGAAGAAG  
 AAGAAGGGATTGTTTGGTAGAATGAAGAAGAAATA

>YLR280C 1.59 Hot

ATGGCGGCAGAGGGCCCGGTGGCCAAAAGATTAATAAGTGTAAATCTAAGGTACAACCTACGG  
 CATGAACCCACTGGGATCGTTGTGCGAGTGCCAAGAAACGCGGTCACGTGAGCAAAATCGAAA  
 GCTTGCCCGGCTTAAAGCTCGCGCGGAACCTTGGCGGTCGTACGACACGATGCCGTCCAGAG  
 AGGAGGCGCTTCTACAGTGGCACCGTCAACAGAAACGCTCGCAGCGCCGCGCAGCGTCGCG  
 AAGTACGAGCAGCGTGAAGAGGCGCTCGAGTCAAAAAGAGGAACGCGAGGCCCGAGACAG  
 AGAAATGGTGCAGGATTATTCCGCCGGTAACCGCAGGTGA

>YIL160C 1.67 Hot

ATGCTCAAAAGACTACAAAGTATCAAGGATCATTTGGTGGAGAGCGCCATGGGTAAGGGTGA  
 ATCGAAGAGGAAGAAGCTCGTTGCTGGAGAAAAGACCCGAAGATGTAGTTATTGTGGCTGCTA  
 ACAGGTCTGCCATCGGTAAAGGTTTTAAAGGTGCCTTCAAAGATGTAAACACAGACTACTTA  
 TTATACAACCTTCTCAATGAGTTCATCGGGAGGTTTCCGGAACCTTTGAGGGCTGATTGAA  
 CTTAATCGAAGAAGTTGCCTGTGGAATGTCTCAATGTGAGGCGGTGCTACAGAACACA  
 GGGCTGCATGCTTGGCAAGTGGGATTCCTACTCGACGCCATTTGTCGCTTTAAACAGACAA  
 TGTCTTTCAGGTTAACGGCGGTGAACGATATTGCCAACAAGATTAAGGTTGGGCAAATGA  
 TATTGGTTTTGGCGCTGGGAGTGAATCAATGACCAATAACTACAAAACGTCATCCCTTGG  
 GCATGATCTCCTCTGAAGAGCTGCAAAAAACCGAGAAGCGAAGAAATGTCTAATAACCAATG  
 GGCATTACTAATGAGAATGTTGCCGCTAATTTCAAGATCAGTAGAAAGGATCAAGACGAGTT  
 CGCTGCGAATTCATATCAAAAAGCTTACAAGGCGAAAAATGAGGGGCTTTTCGAAGATGAAA  
 TTTTACCTATAAAATTACCAGATGGCTCAATTTGCCAGTCGGACGAAGGGCCACGCCCTAAC  
 GTCACCTGCGGAGTCGTTTTCAAGCATCAGGCCCTGCCTTTATCAAAGACAGAGGAACCAAC  
 TGCGGGCAATGCATCCCAGGCTCCGATGGTGTGGCAGGTGTCTTGTAGCCCGCAGGTCCG  
 TAGCCAACCAGTTAAATCTGCCTGTGCTAGGTCGCTACATCGATTTTCAAACAGTGGGGGT  
 CCCCCTGAAATCATGGGTGTGGGCCCTGCATACGCCATAACAAAAGTCTTGGAAAGCTACTGG  
 CTTGCAAGTCCAAGATATCGATATTTTTGAAATAAATGAAGCATTTCGCGGCCCAAGCATTAT  
 ACTGCATCCATAAACTGGGCATCGATTTGAATAAAGTAAATCCAAGAGGTGGTGAATCGCG



TTAGGCCATCCCTTGGGTTGTACTGGCGCAAGGCAAGTAGCTACCATACTAAGAGAACTGAA  
 AAAGGATCAAATCGGGTTGTAGTATGTGTATCGGTACTGGTATGGGTGCCGCCCATCT  
 TTATTAAGAATAG

>YDL197C 1.52 Hot

ATGCCAAAAATCGTGGTGTCTTGGATGCCATCACTCGCAGTGTGATAGATGGTAGTGATCA  
 GGAGTCGAGCTCATCTTTCAACTCGGACAAGGAATATGCGGCTGTGACGAAGGGCCTCAGCA  
 GCTCAAGAGTACAAAAGAAGTCATCTTTAAGGCAGATGAAAAGCAAAGTCAAGGAGCTTCAA  
 TCTTTAGTGAATCATTACCGAGAAAATGAAGCCGCTTTAGTGTCTAGCGCCAAGTTATTGTC  
 CGGCGAGATCATAGGCTATGAAATTAAGATGGCTAGTTTACATGGAAAAATGAAAAGTATCC  
 TGGATGAGAACAACGCGTTAAAGGAAACGCACAAGAGCTCTGCTGAAAAGAGAATCGAACTT  
 GTTCGACTTCCCTCTAGCAAGAAGAACGCAACTACGATGAATACACTTTGCTTGTAAATCT  
 CAAGAAGGAAATCTGCGCCAAGTTACAGGACTACAAAAACGTCCAGAACACGGTGAACACCA  
 AGTTAGATGAGATTCACACGTTCCATGAAAAATACTACGAAGGACTAGAACTAAGTTTAGAC  
 AGCAAGGTGTTTGATGCAGAAAAGCTCAAAAAGAGCTGGCCAAAGTGAGGCGAGAACTGAATAA  
 CGTGAGAAAAAATCCGAAATCAAAGTGAATAAATTGAAAAATGCAACTGCTACAAGCAACCA  
 AATCACTGGAGCACTTGAAGAAGCAGGCTAAAGCAAAGGATGACTATCTTAAATGTATTCTT  
 GAGCTGGTCGACAAAGCCAATCTCACGATGTTATCCTACAAGAAAAGCATCGCTAACCAGAG  
 GGAGACTATCGAAGCATTACAAGCAGAACTATCGCAACAATCAGAAAACAAAGGGGCAAAATAG  
 AAACAGAAACACAAAATCAAGTACAAATCCCCACCAATGTGACTTTGGTGGACCCCTTTGAG  
 GAAAAAATCCAGAGGATTTGTTTCGCTATCCAGGAACAGGAATTGCAAGATCTAAGGTTGCA  
 TAAGAAAATGGCCGATGAGAGGAGCCGAACTACCCACTTGCATTTAGAAAAGAAAAATAATA  
 CCATCAAGCTACTGCAGAGTTACGTGCAATCATTAATTCAACGGCTACCACCAGCCCAGCGC  
 AAACACCATTTGGGCATATTCCAAAAACTTGGTAGCGAAAAATCGTGTCCACTCGCCCCGC  
 TGTGGCAAGTACATATGCGCCTCTTCTACTCTTATCCAGCATTCGAACCATCAAGAAAATG  
 ACAACACCCCTCAACGGCTTCTATTAGCGGCTCCAGACGGGCAGTCATATTCGAAAAAGAGC  
 ACAACACTAAACCTTGATTACTCATCAAGGAAATCCTACTTATCAAGACTACAACCACCACA  
 TATAGCCAACCTGAAGTCTTTGACTCTGAAAACCTTGCCAAGGGTGCCACGGACAGTCCCTC  
 AACTTCCTTCAAAGACAAATCTCAAGAGACTGCAAAGAAAGACGATCGGCCAAAATTTGGTG  
 GCAAATGAACCAGTCACACTAGACACATCAACTCCTCCTGTGGCACAAAGCTTGGCGGATTC  
 AAAGCATTGTTTCAGGACTACATAAATAA

>YOL082W 1.59 Hot

ATGAACAACCTCAAAGACTAACCAACAGATGAACACCTCAATGGGGTACCCCTTAACCGTCTA  
 CGATGAATGTAACAAATTCCAACATAATTGTGCCAACTTTAGATGCAAATATCATGCTTTGGT  
 GTATTGGACAACCTTCACTGCTGAATGATTCTAACGGTTGTAAGCATTGTTTTGGCAACCG  
 AATGACAAGTCAAATGTCCGAATCTTACTAAATAATTATGACTATGGTCACTTGTTCAAATA  
 CTTGCAATGTCAAAGAAAATGCTCAGTTTATATCGGAGAAGGAACGCTTAAAGAAATATAATT  
 TGACTATTTCTACATCCTTTGACAACCTTTTTGGACCTGACGCCCTCCGAGGAGAAGGAAAGC  
 TTATGTAGAGAAGACGCACACGAAGATCCCGTATCTCCAAGGCTGGTTCGGAAGAAGAGAT  
 AAGCCCTAATTCCACCTCTAATGTGGTTGTGTCAAGAGAATGCTTGGATAACTTCATGAAAC  
 AACTCCTTAAGTTGGAAGAATCGTTAAATAAGTTGGAATTGGAGCAAAAAGGTCACAAATAAA  
 GAACCTAACACAGAATAAGCGGTACGATTGACATACCAGAAGATAGGTCCGAACCTAGTGAA  
 CTTTTTCACAGAGTTGAAAACAGTCAAACAACCTTGAGGACGTTTTTCAACGTTACCATGACT  
 ATGAGAGGTTATCACAAGAATGTGACAGTAAGACGGAAATCGCCTCTGACCATTGAAAAAG  
 GAACTAAAATAGAAGTGGAACCCCAATGAGCGCTCATTGCAAATCACAATGAACCAAAG  
 GGACAATTCATTGTATTTCCAGTTGTTTAAACAACACAAACTCTGTTTTGGCAGGCAACTGCA  
 AACTGAAGTTTACTGACGCTGGCGATAAGCCAACCACGCAAATATTGACATGGGTCCCTCAT  
 GAAATAGGAATAAAGGAGTACAAGGAATACCGATACTTTCCATACGCACCTTGATTTAGAGGC  
 CGGCTCCACTATCGAGATTGAAAATCAGTATGGAGAAGTGATCTTCTTGGGCAAGTATGGCT  
 CTTCTCCAATGATTAACCTTAAAGGCCACCTTCAAGATTATCTGCAGAAAAGTTTACAGGCATCC  
 CAAGAGCCATTTACTCCTTTCAAATCGATACGTTACCAGAAGTGGATGACTCTAGTATCAT  
 CAGTACATCCATTTACTCTCTTATGACGGTGACGACAATGAAAAGCCCTGACTTGGGAAG  
 AACTCTAG

>YFL022C 1.81 Hot

ATGTCCTGATTTCCAATTAGAAATCTAAAAAACTAGATGAATTGGATGAGATCAAGTCCAC  
 ACTGGCAACTTTCCCTCAGCACGGCTCTCAAGATGTTCTTTCCGCTTTGAACTCTTTGAAAG  
 CCCACAACAAGTTAGAGTTTTCCAAGGTCGACACGGTTACGTATGACTTGACCAAAGAAGGT  
 GCTCAAATTTTGAATGAAGGTTTCGTACGAAATTAAGCTAGTCAAGCTCATCCAAGAGTTGGG  
 TCAACTTCAAATCAAAGATGTGATGTCCAACTGGGTCTCAAGTTGGTAAGGTCGGTCAGG  
 CTAGAGCTTTCAAGAACGGCTGGATCGCCAAAAACGCCTCAAACGAGCTTGAACTCTCCGCA  
 AAATTGCAAAATACCGATTTAAATGAGCTTACTGATGAAACGCAATCTATTTCTAGCGCAAAT  
 CAAGAACAACCTCGCATCTGGATAGCATTGACGCCAAGATTTTGAACGACTTGAAGAAAAGAA  
 AGTTAATTGCTCAAGGTAATAATCACAGATTTCAACGTTACCAAAGGGCCAGAGTTCTCGACC  
 GACCTCACCAAATTGAAACCGATCTTACCTCCGACATGGTCTCCACCAATGCATACAAGGA  
 CTTGAAGTTCAAGCCTTACAATTTCAATTTCAAGGTGTGCAAATATCTTCAGGTGCTCTTC  
 ACCCCTTAAACAAAAGTCAGAGAGGAATTTAGACAAATTTTCTTTTCCATGGGATTCACAGAG  
 ATGCCCTCGAACCAATACGTGCGAGACAGGTTTCTGGAACCTCGATGCCCTTTACGTCCCACA  
 ACAGCATCCTGCTCGTGACCTGCAAGACACTTTCTACATCAAGGACCCACTAACCGCTGACT  
 TGCCCGATGACAAGACATACATGGACAATATCAAAGCCGTTACGAACAGGGGAGATTCGGG  
 TCCATCGGTTATCGTTACAACCTGGAAGCCAGAAGAATGTCAAAAATTTGGTCTTGAGAACTCA  
 CTCCACAGCCATCTCTGCCAGAATGCTGCACGATTTGGCCAAAGATCCAAAGCCCACCAGAT  
 TGTTTTCTATCGACCGTGTTCCTGCGTAACGAAGCAGTTGACGCCACCCATTTGGCCGAATTC  
 CACCAGGTGGAAGGTGTTCTTGCCGACTACAACATTAATCTGGGTGACCTGATCAAGTTCAT  
 GGAAGAGTTTTTCGAAAGAATGGGTGTCACCGGTTTGAGATTCGAAGCTACCTACAATCCTT  
 ACACCGAGCCATCAATGGAATCTTTTCTTGCCACGAAGGTTTGCAAAAATGGGTGCAAAATC  
 GGTAACCTCTGGTATGTTTCAAGACAGAAATGCTCGAGTCCATGGGTCTACCAAAGGATCTAAG  
 AGTCCTTGTTGGGGGTTATCCTTGGAAGACCTACCATGATCAAATATAAGGTTCAAAAACA  
 TCAGAGAACTGTTAGGTCATAAAGTCTCTTTGGACTTTATCGAAACCAATCCTGCTGCTAGA  
 TTGGACGAAGACTTGTACGAATAA

>YDL124W 1.79 Hot

ATGTCATTTACCAACAGTTCCTTACCTTGAATAATGGAATAAAAATCCCCGCAATCGCCAT  
 CATTTGGACAGGTACTAGATGGTATAAAAACGAAGAAACGGATGCTACCTTTTTCGAACAGTT  
 TGGTCGAACAGATTGTTTATGCTCTGAAGTTACCTGGCATTATTCACATTGATGCTGCTGAG  
 ATCTACAGAACATATCCAGAAGTTGGGAAGGCACCTTAGCCTCACCGAAAAACCAAGAAATGC  
 AATATTTCTTGACAGACAAGTACTCACCTCAAATCAAGATGTCAGATTCCCAGCGGATGGAC  
 TAGATTTAGCTTTGAAGAAGATGGGCACTGACTATGTCGATCTATACCTTTTTCATAGCCCA  
 TTTGTTTCCAAAGAGGTCAACGGGTTAAGTTTGGAGGAAGCCTGGAAGGACATGGAGCAATT  
 GTACAAATCAGGTAAAGCTAAAAATATCGGTGTTTCCAACCTTTGCTGTGGAAGACTTGCAAA  
 GAATTTCTGAAAGTTGCGGAAGTCAAGCCCCAAGTTAATCAAATTTGAGTTCAGTCCCTTCTTG  
 CAGAATCAAACACCAGGGATCTACAAATTTTGCCAAGAACATGATATATTGGTAGAAGCATA  
 CTCGCCACTAGGTCCCTTACAAAAGAAAACAGCACAAGATGACTCTCAACCGTTTTTTCGAAT  
 ACGTGAAAGAGTTATCCGAGAAATATATCAAATCTGAAGCCCAAATTTATCCTACGTTGGGTG  
 ACCAAACGTGGCGTGTTCGCTGTAACCACCTTTCCAAACCTCAAAGAATTTCTGACGCGCA  
 AAATTTATTCTTTTCGACTTGACGGCTGAGGAAGTCGATAAGATAACGGAGTTGGGCTTGG  
 AACATGAACCGCTAAGATTGTATTGGAATAAATTTGTACGGTAAATACAACCTACGCTGCTCAA  
 AAAGTATAA

>YGR174C 1.72 Hot

ATGCAGTGC GCGATAACTCCTAGAGAGGCAGTAATAGCAAAACAAAGACAGTATAAGCATT  
 TTTGGGTATGGAAAGACCATTGTGGGTACGTTGGTTGAAAGTCTATGCAATTGGTGGCGCTA  
 TTATTGGAAGCGGTTTCTGCTTTTCAAGTACACAACGCCAACAGATCAACAGTTAATCAGC  
 CAGCTTTCCCAGAATTACGTTTACAATATGAGAGGGAGAAAAAACTACGTCAGTCGGAGCA  
 GCAGGCTTTGATGAAAATTTGTTAAGGAACTTCTCAAAGTGACGATCCAATTTGGAAGACGG  
 GCCCCTTCAATCACCTTGGGAAAGGAACGGTGATAACGTTCAAAGCAGAGATCACTTTGCT  
 AAGGTGAGGGCGGAGGAGGTGCAAAAAGAAGAGTTGGCTAGGATCAGAAATGAACTGTCTCA  
 GCTAAGATCTGAAACGGAGGAGAAAACAAAGGAAATAGTCCAGGATAAGCAGGTTAAAAGCT  
 GGTGGCGCTTCTGGTAG

>YER146W 1.79 Hot

ATGAGTCTACCGGAGATTTTGCCTTTGGAAGTCATAGATAAAAACAATTAACCAGAAAAGTGT  
 GATTGTGCTGCAGTCGAACCGCGAGTTTCGAGGGCACGTTAGTTGGTTTTCGACGACTTCGTCA  
 ACGTTATACTGGAAGACGCTGTCGAGTGGCTTATCGATCCTGAGGACGAGAGCAGAAATGAG  
 AAAGTTATGCAGCACCATGGCAGAATGCTTTTAAGCGGCAACAATATTGCCATCCTTGTGCC  
 AGGCGGCAAAAAGACCCCTACGGAGGCGTTGTAA

>YJR057W 2.04 Hot

ATGATGGGTTCGTGGCAAATTAATACTGATAGAAGGATTGGATAGGACTGGTAAAACCACGCA  
 ATGTAATATTCTTTACAAAAAATGCAACCAAACGTAAACTATTGAAGTTCCCGAAAAGGT  
 CTACCCGAATCGGAGGACTCATAAACGAATATTTGACGGATGATAGTTTCCAATTATCAGAT  
 CAGGCAATTCACCTCTTGTTCGGCAAATAGATGGGAAATAGTTGACAAGATAAAGAAAGA  
 TTTACTAGAAGGCAAGAACATTGTCATGGACAGATATGTTTATTCTGGAGTGGCATATTCTG  
 CCGCTAAGGGGACAAATGGAATGGATTTGGATTGGTGCTTGCAACCCGATGTAGGGTTGCTG  
 AAACCGGATTTGACATTATTTTAAAGCACTCAAGATGTGACAATAACGCCGAAAAATCTGG  
 ATTTGGTGACGAAAGATACGAAACTGTTAAGTTTCAAGAAAAAGTGAAGCAAACCTTTTATGA  
 AGCTATTGGATAAAGAGATAAAGGAAAGGCGATGAGTCAATCACGATTGTAGACGTTACTAAT  
 AAGGGCATTACAGGAAGTTGAAGCGCTTATTTGGCAAATCGTTGAGCCTGTTTTGAGTACGCA  
 TATTGATCATGATAAATTTTCGTTCTTCTAG

>YMR265C 2.14 Hot

ATGGAAGAATTTGAAGAATTTGGAAGGAAAAGGGGAGATGTCCAGCAGATGTGGCAATCACCG  
 TGTGCTCAGAAAAATGGAATAGTTGCGCTTTCGAGTTGGCCGTGCCCTTTGAGGTTCCCTGAGC  
 ATGCGATTACGAAATTCACATATACGACTTCGACAATACATTATTTGCAACGCCGGGTCTT  
 ACAGAGCAATTGTATACACGTGAGCTACTAAAATTTGTTGACATCGAGCACGCTACCGAATGG  
 AGGCTGGTGGAAATGAGCCGGGGTTTTCTGCAGGCTGCTATTGAGATCTCGAAGACTAAACCGA  
 GAAGGTATTTCGTGGAATGCGGATATCGTTAAAATGGCGGAGGAGTCATATTTCTGCCAAGGAT  
 ACTATCTCGATCGTTTTTAACGGGCAGAGAGGAAAGTAAAGTTCCATAAGTTGATTGAGCATGC  
 TTTACAGACGGCAAGGAGCCATTGGAATGCTCAGAAAAATGAGTTTAGGTTCAATGCAGTTT  
 GCCTAAAAAAAGAGCAATTTCTGAGTACACTAGCAAATATAAAAAAGAGTTGATGCGGGAT  
 TTCTTAGAATATTATCCCTCTCTGCGGGAGTTGTCCATATATGATGATAGAATACACCAAAT  
 AGATGCATTCAAGTCTTTCTTCCATTCTTTGGATCTACCACGTCTGAAATGGTCTGCGATCC  
 CCGTACGACCATTACCAAATCGCTGCCAAGAGAGCAGGAACCTTGAATGGTGATGGACATG  
 GTACGAAAGAACAATAGCCAAGCTCTCAGCACCTCACAAAAGTTTGATTTAAGACGGACTCC  
 AAGACAAATTTGGTTATATCCTTTGCACGGCATCTCATCGTCTATTATCAATAGAGGTCATCA  
 AGTACTTAAAGCGGCGTAAGGGGAGAAGAACGTTTCAGACCCAAGCTGTATGAACATCCCTTG  
 TATATACCGTGCAGCAACCCGTAAGGATATCCCTGCACTTGAATCGCTAAGGTATGGTC  
 AAACAATGACACTCGCACGTTTGATTCTGAGAAGAAAGTACAGCATATTTACAAAATTTTTT  
 ATCTGGAACAGCCTGGGAAGTGCATCGTACACTTCCAAGTCACAGACCTTGCCGTCATCGCG  
 TCGGCCACCACAACAGAAGAAAGCCATTGGAGTTTTATTTCAAAGCCACACCCGAACCAA  
 CAGATACACTTTCCTCTCTTCCAGAATATATAGTCACTGGTCAATTTTTACAAAAGAGACC  
 GAATTGAAGATTTAGAAGTGGTAACAGAGCGTCTAATAAACTGCAAGGAAGATATTCCTGG  
 GTTCCGTTAGACAATAACAATAAAGGCATTTTTTCGGGCGATTTGCCAAGTTGGCAGC  
 AATACCGTGTCCAATGCTTAA

>YFR024C-A 1.64 Hot

ATGGGTATTAACAATCCTATTCCAAGGAGTTTAAAGAGTGAGACAAAAAAGCAGCGAAGAT  
 TTTGGCTAGTTTTGTCAAACCAAACCAAGTTTTTGGTGCGGACCAAGTCATTCCCTCCAGACG  
 TTTTGAAAAGAGCTAAAGGGTTGGCTATCATAACGATCTTAAAAGCAGGTTTTCTATTTTCA  
 GGTAGAGCTGGTTCGGTGTGATTGTCGCAAGATTAAGGATGGTACTTGGTCAGCTCCATC  
 TGCCATTGCCATGGCAGGTGCTGGTGGCGGTGGGATGGTTGGTATAGAATTGACTGATTTTG  
 TTTTCATTTTAAATACTCAGGATGCTGTTAAGTCGTTTTCTGAATTTGGGACCATCACGTTG  
 GGTGGTAACGTCTCCGTTTTCTGCTGGGCCTCTTGGTAGAAGTGCAGAAGCAGCTGCATCAGC  
 CTCCGCCGGTGGTGTGGCTGCAGTTTTTGCCTATTCTAAGAGTAAAGGTCTATTTGCAGGGG  
 TTTCTGTGGAAGGTTTCGGCTATTATAGAAAAGAAGAGAGGCTAACAGAAAAATTTTATGGTGAC  
 AATTGTACCGGAAAATGATTTTGTCTGGTAGGATAAGACCCGCTCCAGCAGTTGATCCATT  
 GTTTCGTGTTTTAGAGTCCAGGGCGTTTAAATTACAGACCCCTCCAACGGTGGTCTGGCAGTT  
 TCGATGACGACGAAGACGATTACTATGACGACGACGATTACTATAATGACATTCCTAGTTCA

TTCAGTTCTACAGATGCTTCTCCTCCACTAGACCTAACACAAGATCCACAAGGAGAAGAGCCCA  
 AAGCGGTTCTCGTTATACGTTTCGACGATGATGATGACGATGATGATTATGGTACTGGCTATT  
 CAAGGAATTCAAGACTGGCTCCTACCAACAGTGGCGGTAGTGGTGGTAAATTGGATGACCCA  
 TCTGGAGCTTCAAGTTATTATGCCAGCCACAGAAGATCAGGAACTGCTCAGTCAAGGGCTCG  
 TTCTTCAAGAAATCGTTGGGCTGATGATGAATACGATGATTATGATGATGATTATGAATCCG  
 GGTATAGACGCGGGAATGGAAGAGATAGGACAAAAGACCGTGAAGTCGATGACTTGTGCAAC  
 AGATTTTCTAAATCTAGAATCTCGTCCGCTTCAACACCGCAAACCTAGTCAGGGCAGATTCAC  
 TGCTCCAACATCCCCATCCACGTCTTCTCCAAAGGCCGTGGCATTATATAGCTTTGCAGGAG  
 AAGAGTCCGGAGATTTACCATTTCAGAAAGGGTGACGTGATCACAATTTTGAAAAAATCAGAT  
 TCTCAAATGACTGGTGGACCGGAAGAGTCAACGGTAGAGAAGGTATATTTCCAGCAAATTA  
 CGTTGAAGTAGTTTAA

>YAL062W 1.79 Hot

ATGACAAGCGAACCAGAGTTTCAGCAGGCTTACGATGAGATCGTTTTCTTCTGTGGAGGATTC  
 CAAAATTTTTGAAAAATTTCCACAGTATAAAAAAGTGTACCTATTGTTTCTGTCCCGGAGA  
 GGATCATTCAATTCAGGGTCACGTGGGAAAAATGATAATGGCGAGCAAGAAGTGGCTCAAGGA  
 TACAGGGTGCAGTTCAATTCAGCCAAGGGCCCTTACAAGGGTGGCCTACGCTTCCACCCATC  
 AGTGAACCTGTCTATCCTAAAAATTTTTGGGTTTTGAAACAGATCTTCAAGAATGCGCTCACTG  
 GGCTAGATATGGGCGGTGGTAAGGGTGGCCTGTGTGTGGACTTGAAAGGCAAGTCTGACAAC  
 GAGATCAGAAGGATTTGTTATGCGTTCATGAGAGAACTGAGCAGGCATATTGGTAAGGACAC  
 AGACGTGCCCGCAGGAGATATTGGTGTGCGGTGGCCGTGAAATTTGGCTACCTATTTCGGCGCTT  
 ACAGATCATAACAAGAACTCCTGGGAAGGTGTGTTGACTGGTAAGGGTTTTAAACTGGGGTGGC  
 TCACTTATCAGGCCGGAGGCCACCGGGTTTCGGCTTAGTTTACTATAACGCAAGCAATGATCGA  
 TTATGCAACAAAACGGCAAGGAGTCTTTTTGAGGGCAAACGTGTGACAATCTCCGGAAGTGGCA  
 ATGTTGCGCAATATGCAGCTTTGAAAGTGTGAGCTGGGTGGTATTGTGGTGTCTTTATCC  
 GATTCGAAGGGGTGCATCATCTCTGAGACGGGCATTACTTCTGAGCAAATTCACGATATCGC  
 TTCCGCCAAGATCCGTTTTCAAGTCTTTAGAGGAAATCGTTGATGAATACTCTACTTTTCAGCG  
 AAAGTAAGATGAAGTACGTTGCAGGAGCACGCCATGGACGCATGTGAGCAACGTCGACATT  
 GCCTTGCCCTGTGCCACCCAAAACGAGGTCAGTGGTGACGAAGCCAAGGCCCTAGTGGCATC  
 TGGCGTTAAGTTCGTTGCCGAAGGTGCTAACATGGGTTCTACACCCGAGGCTATTTCTGTTTT  
 TCGAAACAGCGCGTAGCACTGCAACCAATGCAAAGGATGCAGTTTGGTTTGGGCCACCAAAG  
 GCAGCTAACCTGGGCGGCGTGGCAGTATCCGCTCTGAAATGGCTCAGAATTCTCAAAAAGT  
 AACTTGGACTGCCGAGCGGGTCGATCAAGAACTAAAGAAGATAATGATCAACTGCTTCAACG  
 ACTGCATACAGGCCGCACAAGAGTACTCTACGGAAAAAATACAAACACCTTGCCATCATTG  
 GTCAAGGGGGCCAACATTGCCAGCTTCGTTCATGGTGGCTGACGCAATGCTTGACCAGGGAGA  
 CGTTTTTTTAG

>YLR255C 1.69 Hot

ATGGGTGTGGGTGGAACGAGGATTGTATCGTTTAGACAGCCGAATTATTACCCGGTTACTCA  
 AAAAAAGGGGCAAGCCAGACAGGTGCAGTGGCTCAGCCGTACAGCTCGTACTGTGGTTTGC  
 TAATGCGCTGGGCGGTTGTTGAGATAAGAAGAAGAGGGAAAGGGAAAGGAAGAAAGAGGAAG  
 AGAGAGAGAGAGAAAGGGCACACGAAATTCAGGATACGGCGGAGGAGTTATCTTTATTTAT  
 ACGGTCTTGCCCTGTAAAGGCCCTACTCAAGCGGGAACAAGAAAAACAGTTGTAGCTTCCACA  
 AGATGTTGGCTATAGAGATTGTTCTGTGCTTAAAGGCTCGCTAA

>YLR374C 1.75 Hot

ATGTTTCAATATTAGGCAGTGTGCGGATGTGTCGAGGCGGACGAAGCCTCGCCATTATATTGTCT  
 CTCGGCTGCCTTGATAAGGTTGTCAAATGACGAGATGGGAGGCAACGTGATGTGGTTCATAG  
 CACTATTGTTTGCATTACTCATCGCTCGCTGCACATGCCACACAAAAAACACCCACCCCTGAT  
 TTCTCGAAACCAACTTTTTGTCAACCAACATGCAGCGCTTACCAACAGTCTGTCTTCTTTATA  
 CCGTTGCTTTGTTCAGATGGTACTGCCATGCTTCCAACGGCTACAAAAAAAACACCGCAAC  
 GGCGAAAAAATGGCGCAATTATTCACCGTGTAGTCATTTACCACGGCCGGGAAAGCGCGAAT  
 GGGATCAGCAAACAATAA

>YKL037W 1.92 Hot

ATGCAGACAATGGGCGGGGAGCACCTTCTTCTTTTACAGCTAAAGGGGTCTTTCTTTCTCCT  
 ACTTTTGGCATACTTTTTTTCAGGGGCAGAAGTCCTTATTACGCACGTTGCTACCGCCGGCTTG

CTGTTACACCTGGTGCCATCACTATTGCCATTGCCATTGCTACAGATTCAATTCGGGCGCTT  
 GCAAAGTCCAAAGTTCTGGTGTGCGTTTTGTCTCACACAGATCCCTGTACAGCGTCTTGTA  
 CCTGATCCCCTTCCCCGCCCTTCTCGAACAGCCTGACGCGCTTCTCTTTTGTGGGCT  
 CGGCCGTTTTTGCATTTCCCTTCCCTGTTTTGGATTGAGTATATAA

>YOR223W 1.65 Hot

ATGTCGCGAGAACCATTATTACCCACACATAACGGATCGCAGGGAGGGGAAGTGAGGTCCCC  
 AGATCAGAAGTTCATTGTGATACGGTTTTCCGACGTATCAGTAAGGGATCTGCAGTTGAACA  
 TATCAAATGTACCATTTTTCGAATATAAATACCCACTGGCTACGTCGGATGTGTAGAGAATTG  
 AGGCCCAACAAACACAAAAAGAAGACTGAAGTTTATAAGGAACGGGAGTATTCTGAATAC  
 GCATTCCAAGATTGCTGAGGAACGACGCATTACTTCGATACTGCTAATAACTCTAACGTCG  
 CAACAGGCACCAGCGTGGCACCAGAGCAGAACAATACTATATTTCATTGTATAATTGGTACA  
 GAGGAGCTGACACAAGCAGAGTTAGCCAACGAAGATCTAAAGGACGATGCAACTCCGTCCAA  
 TGACTCCATGACCACGCAGGCCATCGGGTTTGATAGGCTACGATCCGTGGGATTTACTGAGC  
 AAGAAATCGAACTGCTGAGGCAACAGTTTTCGGGCCACGTATGGAGATTTGGAGGAGGAGGAG  
 GAGAGACTTGCTCAAAATGGCAACAGAGATGATGAGGGCCATGACATTAGACAGTTGGAGGA  
 ACAGTGGATGGAAAGCGGGAGTGGGACCGCTCAGGGGAATGGGGCCGGAGGCGCAATGAAG  
 ACAGGTTTTAACTCTGTGCCGATCGCTAACATAAAGCACAACAAAGACTTGCTTTTAGGTATA  
 TGTGTGCGATTCTTCTTCGGCGTCTTTGGTATACTATTAATGAAGTTTGTGATTGTTCAA  
 CAGACGGCAAAAAATGGCGATTTTTGCCGGTGTGATTGTTAATGTTATGTTTTGTCTTGTGA  
 GAGTTTTTTAG

>YJR115W 2.33 Hot

ATGTTACAAAATACACGTACAATATTAATATACAATAGTAAGGTGATGAACACACACACACA  
 CACACACACACACACACACACACATATATATATATACAGGAGATCAAGTTAGTGTGAGGG  
 GACGACTACTGAGTTTTGAAGTTCTTTTAAAGTGTAAAGTTATTTTTCCCTCTCCACCTCG  
 TTGGCAACCTCTCACCACCGCTTAGCAGCATGTCTCCGTACATGACCATACCTCAGCAATA  
 CTTATACATAAGCAAGATACGTTCCAAGCTGTCTCAGTGCGCCCTTACTCGACACCACCACA  
 GAGAACTTGATCTACGAAAAATGGTGGGCCACGCCAATATGCTGGACAGGATCCTCGACGAA  
 ATAGACGAAATCGACAGCGAGGTAGTACTGTGTGACGCTGCCGATGGTTCCTTACTGCAGA  
 AGCTCATTCCGCTTCCCCAGCATCCAGCGACTCTTCTCCTCTCACTAATAACATCCGGCCCA  
 TTAGCATTATGTGA

>YHL006C 1.82 Hot

ATGCAGTTTTGAAGAGCGGTTGCAACAGCTAGTAGAAAGCGATTGGAGCCTGGATCAGTCAAG  
 CCCAAACGTACTGGTGTAGTCCTTGGAGACACTGCCAGGAAGTACGTAGAGTTAGGAGGAC  
 TGAAGGAGCACGTGACTACGAACACTGTGGCAGGTCACGTGGCAAGCCGGGAGCGGGTATCC  
 GTAGTTTTTTTTGGGCCGGGTAAAGTACTTATACATGTACCTCACCCGGATGCAAGCGCAGGC  
 GAATGGTCCGCAATACTCTAATGTACTCGTCTATGGATTGTGGGATCTCACCGCGACACAAG  
 ATGGACCGCAACAGCTGCGGCTACTTAGCCTTGTGTTACGGCAGTGCCCTCAGTCTGCCATCT  
 AAAGTTGAATTCTATCCAGAACCSCCTTCTAGTAGCGTGCCGCTGCCCGGCTATTGCGATTCTG  
 GGACCATATTATCAGATAG

>YHR019C 5.09 Hot

ATGTCATCTTTGTACATTAAGGAGGCTACCGGTGTAGACGAATTGACCACAGCCGGTTCACA  
 AGACCATCCATTCAAACCCCAGCATATGCTTTGTTTCGCATCTCAACAGAAGAGCGATGCCA  
 CGGAACCTAAGCTTTTCGTGTTAAGACAGAAGACAACGAGTACCAGGAAATCAGTGCTTCT  
 GCTTTGAAGAAGGCTCGTAAGGGCTGTGATGGTTTGAAGAAAAGGCAGTCAAGCAAAAGGA  
 ACAGGAGTTGAAGAAACAACAAAAAGAGGCAGAAAATGCTGCCAAGCAATTGTCTGCTTTGA  
 ATATCACCATTAAGGAGGACGAATCGCTACCAGCTGCCATTAAGACTAGAATTTATGACTCT  
 TATTTCCAAGGTCCGACAAAGAGTTAAGGTTTCCGGTTGGATCCATAGATTACGTTCTAACAA  
 GAAGGTTATTTTCGTCTCCTCAGAGACGGATCTGGTTTCATTCAATGTGTCTTGTCCGGTG  
 ATTTGGCATTGGCTCAACAAACTTTGGACCTGACTTTGGAATCCACCGTTACTCTGTACGGT  
 ACCATAGTCAAATGTCCTGAGGGTAAAACCGCTCCAGGTGGTGTGAAATGAATGTGACTA  
 TTACGAAGTTGTAGGTTTGGCCCCGGTGGTGAAGACTCCTTTACAAACAAAATCGCAGAGG  
 GCTCAGACCCTTCTTTACTGTTGGACCAACGTCATTTGGCCTTGAGAGGAGATGCCTTGTCT  
 CGAGTCATGAAAGTCCGTGCTGCTCTACTGAAAAGCGTTAGACGTGTTTATGATGAAGAACA

TTTGACAGAAGTTACCCACCATGTATGGTGCAAACCTCAAGTCGAAGGTGGTTCCTTGT  
TCAAGATGAACTATTACGGCGAGGAAGCTTACTTGACCCAAAGTTCCCAATTATATTTAGAA  
ACCTGTTTTGGCTCCCTAGGTGATGTTTATAACCATCCAAGAATCTTTCAGAGCTGAAAAGTC  
CCACACAAGAAGACATTTGTCCGAATATAACCCATATCGAAGCTGAATTGGCCTTCTTGACTT  
TCGACGATCTATTACAACATATTGAAACTTTGATCGTCAAATCCGTGCAATACGTTTTGGAA  
GACCCAATTGCTGGCCCACTCGTAAAACAATTGAATCCAACTTTAAGGCTCCAAAGGCTCC  
ATTCATGAGATTACAGTACAAGGATGCCATTACCTGGTTGAACGAACACGACATCAAGAACG  
AAGAGGGCGAAGACTTTAAATTTGGTGACGATATTGCAGAAGCTGCTGAAAGAAAGATGACC  
GATACCATCGGCGTCCCAATCTTTTTGACGAGATTCCAGTAGAAATCAAGTCTTCTACAT  
GAAGCGTTGTTCTGACGACCCCGCGTCACTGAATCCGTGACGTTTTTGATGCCAAACGTTG  
GTGAAATCACTGGTGGTTCTATGAGAATCGACGACATGGACGAACTAATGGCAGGGTTAAG  
CGTGAGGGTATTGATACCGACGCCTACTACTGGTTCATTGACCAAAGAAAATACGGTACTTG  
CCCACATGGTGGTTACGGTATCGGTACCGAACGTATTTTAGCCTGGTTGTGTGACAGATTCA  
CTGTCAGAGACTGTTCTTGTATCCACGTTTCAGCGGTAGATGTAAGCCATGA

>YPR045C 1.61 Hot

ATGCAGAATCCTTACGGTCACTTTACTAACAATACCACGGAGGACAGGGGAAGCTTCATCTCA  
AGGAGGACCATTCGGCCAAAGCCTGAATAGGCCCTTAGATTACGCCGGATCTTTCCTTCTC  
TGACATAACAATAATAAATTTTCATTGCCAATCAACAACCTTCTCTGCCCTTTGCCAGAACCA  
CGTTTTATCTTGGAAACAACGTCAACCAGGTTTCTAACCTTTGATGGTAACACCGCTTCCGGG  
ATTACAAAAACGTATGAACAAAAACATTA AAAAGAAATTAACCAAGAGTATCTAAGAAGGCAT  
CAGCCCTTTCTAACGGGGTATCCGGCAATGTAATGAGCAACAGTAATATAGTAGGGCATGGT  
GCTGTAGGTTCCGGCATCGGGATGGAAAGTTGAAATGGGTGGCAGTGATGAATTAGAGAGAAG  
AAAGAGAAGGGCAGAAAGATTCAGTCAGGGACCATCAGCGACGACGAATAGTAACGATAATT  
TGAATGAAGACTTTGCCAACCTAAATGCCATTAGTAGCAAATCTCATCAATATGACAAAAAG  
ATTCATGTGGTAGGGCGTTGCCAAACTCTAGAGAAATCTTATCTGAGACTAACTTCAGAGCC  
TAATCCTGACTTGATCAGACCCCCAAATATTCTACAAAAAATGTATTGCTTGTTAATGGACA  
AATACCAATCTAAAACAGCCACTTATACTTACCTTTGCGACCAGTTTAAATCAATGAGACAA  
GACCTAAGAGTGCAAATGATCGAGAACTCTTTCATTAATAAGTGTACCAAACGCATGCACG  
TATTGCCTTGGAGAACGGAGATCTTGGGGAATTTAATCAATGTCAAAAATAGGATTATGGCGT  
TATTCGAAAACCTTACAATACCAAAAAAATCTTATTCCGAATTTATATGCTATTCTGTTTTG  
TATTCGATGTTAACCGAAGACTATCCGTGATTTCTCATTTAAAACCTAAGTTAATAGACGA  
TGGCTCTTCGGAAATCTTGGAGGACGAACATGTCAAAAATGATATTTGAGTTGAGCGATATGA  
AACTAGTCGGCAATTATCACTACTTCATGAAAAACTACCTAAAACCTGCACAAATTTGAAAAA  
TGTCTAATTAATTCATTCTTAAATCTAGAAAAGTTGATATTTTTGACCATAATTTGTAAGAG  
TTATAACCAGGTCAATTTAGATTTTTGTTAAAAGTGAGTTAATTTCAACAGTATAGAAGAGA  
CAACAAATTTCTTGAATGAGCAAACTTGACGGAGTTCAATTAACAAACAAATCACTGAC  
AGTAATGGCAAAAGTAGTAATATCAAGATTTTGAATACCAAGGGATGTAGGGTACAGTTGAT  
ACAAAATTATATGAAGTCTAAAAAAATTTGATATAAAGGGACAAAAATGA

>YBR009C 1.51 Hot

ATGTCCGGTAGAGGTAAAGGTGGTAAAGGTCTAGGTAAAGGTGGTGCCAAGCGTCACAGAAA  
GATTC TAAGAGATAACATCCAAGGTATTACTAAGCCAGCTATCAGAAGATTAGCTAGAAGAG  
GTGGTGTCAAGCGTATTTCTGGTTTGATCTACGAAGAAGTCAGAGCTGTCTTGAAATCCTTC  
TTGGAATCCGTATCAGAGACTCTGTTACCTACACCGAACACGCCAAGAGAAAGACTGTTAC  
TTCTTTGGATGTTGTTTATGCTTTGAAGAGACAAGGTAGAACCTTATACGGTTTTCCGGTGTT  
AA

>YLR307W 1.52 Hot

ATGAAAATTTTCAATACAATACAATCTGTGCTGTTTCGCAGCATTTTTTCTAAAACAGGGAAA  
TTGCCCTTGCCTCAAATGGGAGTACCGCATTTGATGGGGGAAGTAGATATGCAAACGCCCTTTC  
CAGAGTGGTTAACAGAATTTACTAATCTTACACAATGGCCTGGAATTGACCCACCTTATATT  
CCGCTAGATTACATAAATCTTACTGAAGTGCCAGAATTAGATAGGTAATCCTGGCCAGTG  
TCCCAAATTTCTAGAGAGCAGTGCTCATTGACTGCTATAACTGCATCGATGTTGATGATG  
TAACCTTCGTGTTCAAATTTCCCAAACATTTGACGACGGTCCGGCCCCGGCGACAGAGGCA  
TTGCTCAAGAAATGAGACAAAGAACCCTTTTTTTGTTCTGGGGATAAACACTGTTAATTA  
TCCTGATATATATGAGCATATTTTAGAGAGGGGTCAATTTGATTGGTACACACACGTGGTCA

ATGAATTCCTTGCCAAGTTTATCAAACGAAGAAATTGTAGCCCAAATTGAATGGTCAATTTGG  
 GCTATGAATGCCACAGGCAAACATTTCCCCAAGTATTTTAGGCCTCCATACGGTGCAATTGA  
 TAATAGGGTTAGAGCTATAGTAAAACAGTTTGGCCTAACGGTTGTCTTGTGGGATCTCGATA  
 CTTTTGATTGGAAATTAATCACTAATGATGATTTTCAGAACAGAGGAAGAAATACTTATGGAC  
 ATAAATACTTGGAAAGGAAAACGGAAAGGTTTGATCTTAGAGCACGATGGTGCACGAAGAAC  
 AGTTGAGGTTGCTATTTAAAATCAACGAACTTATTGGTAGTGACCAATTGACAATTGCAGAAT  
 GTATTGGTGATACAGACTACATCGAACGCTACGACTAG

>YNR014W 1.72 Hot

ATGTCGTCCACGGATATCAAGCCTTGTGCCGTGAACATCCCTGTTTCCGCTCACATCACCTT  
 CCACTACAAGTCGATCGCGGACAGAAGCAGCAGCAGGAGCAGCAGCAGCAGCTCCTGCTCCT  
 CTGCTACATCTAAAGCCTGCTCCCCAGAGGCAGCTCCGTCGGCTTACCGCCTGCTTTATCA  
 ACTGACAATGAAATCGTCGAGACTGTACTTAATGTTTCCGCTCCCGTTGTAGCAGACCCCTAC  
 GCGGCCCTCATTGTTCAAGAGTAACTACACCGCAGCCTCGTGCTTGACTTCTGACCCAACCT  
 CGCCGTCACTACTGCCCTCTTCTAGGCGCAACTCTGTATTGCCGGCAAGCGACTTCCACCAA  
 TGCGCGCATCACAAAACTTTCAAAGAAGGGCCAGTGAGCCACAACCTGCCCTCCTTCGATAA  
 TCGCTCGTCCGAGATGAAAAGGTCCGCTCTCGTACGCCCAGCATAGCATGATGTTCCCCA  
 TCAGTGACCAACAGGAGCCGCAAACATCCGCGTCTCCTAACGACCACTCAGACCCGCTTGT  
 CCTTGCAACAGACATCACCACAGAAGAACTCGGTCGCCGTCAAGTTTGACAAACCATTGTA  
 TGAGAGACTAGAGACGTAG

>YGR060W 1.89 Hot

ATGCTGCGGTTTTCAACAACGCTACCCTTTCAGGTCTAGTCCAAGCAAGCACCTACTCACA  
 AACTTTGCAAAATGTCGCCCATTACCAACCTCAATTGAATTTTCATGGAGAAATACTGGGCCG  
 CATGGTACAGTTACATGAACAATGATGTTTTGGCCACCGGTCTAATGTTCTTTTTATTGCAT  
 GAATTTATGTATTTCTTTAGATGTTTTGCCATGGTTCATCATCGACCAAATTCATACTTTAG  
 AAGATGGAAGTTACAACCAACTAAGATTCCAAGTGCTAAGGAACAACCTATACTGTTTGAAT  
 CCGTCTTTCTATCTCATTCTTGGTTCGAGGCCATCCCTATCTGGACCTTCCACCCAATGTGT  
 GAAAAATTAGGTATTACTGTGCAAGTTCCATTCCCATCTTTGAAAACAATGGCTCTAGAAAT  
 TGGTCTATTCTTCTGCTTGGGAAGATACATGGCATTACTGGGCTCACCGTCTATTCCACTACG  
 GTGTCTTTCTACAAGTACATTCACAAGCAACATCACAGATACGCTGCTCCATTCCGGTCTTTCT  
 GCTGAATATGCTCATCCTGCTGAAACTTTGTCTTTGGGTTTTGGTACCGTTGGTATGCCAAT  
 TCTTTACGTACATGTACACTGGTAAATTACACTTGTTCACTCTATGTGTATGGATCACCCATA  
 GATTATTCCAAGCTGTTGACTCTCATTCTGGTTATGACTTCCCATGGTCTTTGAACAAGATC  
 ATGCCATTCTGGGCTGGCGCTGAACACCACGATTTGCATCATCACTACTTTATTGGTAACATA  
 CGCTTCCTCTTTTACAGATGGTGGGATTACTGTCTAGACACTGAATCTGGTCCAGAAGCTAAGG  
 CCTCCAGAGAAGAAAGAATGAAGAAGAGAGCTGAAAACAATGCTCAAAGAAGACTAACTAA

>YOL086C 1.75 Hot

ATGCTATCCCAGAAACTCAAAAAGGTGTTATCTTCTACGAATCCCACGGTAAGTTGGAATA  
 CAAAGATATTCCAGTTCCAAAGCCAAAGGCCAACGAATTGTTGATCAACGTTAAATACTCTG  
 GTGCTGTACACTGACTTGCACGCTTGGCACGGTACTGGCCATTGCCAGTTAAGCTACCA  
 TTAGTCGGTGGTACGAAGGTGCCGGTGTGCTTGTTCGGCATGGGTGAAAACGTTAAGGGCTG  
 GAAGATCGGTGACTACGCCGGTATCAAATGGTTGAACGGTCTTGTATGGCCTGTGAATACT  
 GTGAATTGGGTAAACGAATCCAACGTCTCACGCTGACTTGTCTGGTTACACCCACGACGGT  
 TCTTTCCAACAATACGCTACCGCTGACGCTGTTCAAGCCGCTCACATTCCTCAAGGTACCGA  
 CTTGGCCCAAGTCGCCCCCATCTTGTGTGCTGGTATCACCGTCTACAAGGCTTTGAAGTCTG  
 CTAAC TTGATGGCCGGTCACTGGGTTGCTATCTCCGGTGTGCTGGTGGTCTAGGTTCTTTG  
 GCTGTTCAATACGCCAAGGCTATGGGTTACAGAGTCTTGGGTATTGACGGTGGTGAAGGTAA  
 GGAAGAATTATTAGATCCATCGGTGGTGAAGTCTTCATTGACTTCACTAAGGAAAAGGACA  
 TTGTCGGTGTCTTCTAAAGGCCACTGACGGTGGTGTCTACGGTGTCTACGTTTCCGTT  
 TCCGAAGCCGCTATTGAAGCTTCTACCAGATACGTTAGAGCTAACGGTACCACCGTTTGGT  
 CGGTATGCCAGCTGGTGCCAAGTGTGTTCTGATGTCTTCAACCAAGTCGTCAAGTCCATCT  
 CTATTGTTGGTCTTACGTCGGTAACAGAGCTGACACCAGAGAAGCTTTGGACTTCTTCGCC  
 AGAGGTTTTGGTCAAGTCTCCAATCAAGGTTGTCCGCTTGTCTACCTTGCCAGAAATTTACGA  
 AAAGATGGAAGGTTCAAATCGTTGGTAGATACGTTGTTGACACTTCTAAATA

>YCL009C 1.68 Hot

ATGCTGAGATCGTTATTGCAAAGCGGCCACCGCAGGGTGGTTGCTTCTTCATGTGCTACCAT  
GGTGC GTTGCAGTTCCTCGTCGACCTCCGCGTTGGCGTACAAGCAGATGCACAGACACGCAA  
CAAGACCTCCCTTGCCCACACTAGACACTCCTTCCTGGAATGCCAACAGTGCCGTTTCATCC  
ATCATTTACGAAACACCAGCGCCTTCTCGTCAACCAAGAAAACAGCATGTCTTGAAGTGT  
GGTGCAAACGAACCCGGTGTCTTGTCCAGAGTCTCGGGTACGTTAGCTGCCAGAGGCTTTA  
ACATCGATTTCGTTGGTTCGTGTGCAACACCGAGGTCAAAGACCTAAGTAGAATGACCATTGTT  
TTGCAAGGGCAAGATGGCGTAGTCGAACAAGCACGCAGACAAATCGAAGACTTGGTCCCCGT  
CTACGCCGTCTAGACTATAACCAATTCTGAGATCATCAAAAAGAGAGCTAGTGATGGCCAGAA  
TCTCTCTATTGGGTACTGAATACTTCGAAGACCTACTATTGCACCACCACACTTCCACCAAT  
GCTGGCGCCGCTGACTCCCAAGAATTGGTTCGCCGAAATCAGAGAAAAGCAATTCACCCCTGC  
CAACTTGCCCCGCCAGTGAGGTATTAAGGTTGAAGCACGAGCATTTGAACGATATCACCAACT  
TGACCAACAACCTTTGGAGGTTCGTGTTCGTGACATCAGCGAAAACAAGCTGTATTGTGGAGTTG  
TCTGCAAACCCACACGTATCTCTGCCTTCTTGAAGTTGGTTCGAGCCATTCGGTGTCTTAGA  
GTGTGCAAAGAAGCGGTATGATGGCATTGCCAAGAATCCTTTGAAGACAAGCACCGAGGAAG  
CTGCCGACGAAGACGAAAAGATCAGCGAAAATCGTTCGACATTTCCCAACTACCACCTGGTTAG

>YPL055C 1.63 Hot

ATGAGCGGATACACGGGAAATAATTATAGCAGATACTCATCCACTCCTCCGAGACAAAGGGG  
GGGTATACCCATGCGAGACGAAGTAGAGGTGGAGCAGGCGGATCGTATTACAGAGGCGGTA  
ATGCGTCTTATGGCGGAGATACAACAGTGACTATGAGCAGCCGCCCAAGAGGGAGACTTG  
AGACAAACCGGAGCATACTATCGAAACGGATACACAGATACAAGGCCGTACTATTCAGCTAA  
TAGCAGGCATTACCAAGCACAAACCATCCCCAGGTACAACAATGGTACAAATTCGTACCACC  
TACCGCAACGTGGCAATAGTCAAGATACGAACGGCAGGACCACGAGCGCTCGCAAGAAGAT  
AATGACGAAAAAAGAGTCAAGTCCAGATACCGGAACATGCAGGCAGATCATCCACGCCAACA  
ACCGATGAGCGTTGGCAGCACCAGCAGCAAATGGTAGTAGTGGGAACAGCAGCACTAGCA  
GCACCAGCAACGGGCTTCCGCCACCACCTTCAGTATCGTCTATAACCAACAATAGATCATAT  
CACAGCAGTGCTTATCCATATTCAGCAGCCATACTTACAATAATTACCACCACCGTGAGAC  
ACCACCGCCTCCCCATCGAATGGCTATTATGCAAAGGGTTACCCAGTACACGTACCAGAAA  
ATAGAAGTAACAGCGACGGCTCTAGCAGCAGCGTTCGTCAAGAAGAAAAGAATACTAGATATG  
AAAGATTCCCCCTTTATTTACTTGACAGATTTTGATAAAAAATGTGAAAAAGACAAACAACAC  
CGAAAGTGAATGTGAAAAGGCGAGGGAAGTTTCAAAGAGAGCGATTCCATCGATTCCGCTT  
TGGAAGAATAAACCTAAAAATCAATTCTAATGAGCTAGAATTGCGGCTCCTAAATAACCAG  
TGCGACAAGCATGCATTAATAATTCAACTGACCCAAGAAAAGCTGGACTCATTGTTATTAAT  
GCAGTAG

>YPR037C 1.96 Hot

ATGAAACAGATAGTCAAAGAAGCCATGCCATCAGAATAGTTGCAGCATTAGGAATCATAGG  
CCTGTGGATGTTTTTCTCGTCTAATGAACTATCCATCGCTACGCCGGGCCAATCAAGGCGA  
AGTCTGGTATAGATGAAGTGCAAGGGGCGGCTGCTGAGAAGAACGACGCTCGGTTGAAAGAG  
ATCGAGAAGCAAACCATTATGCCATTGATGGGCGATGACAAGGTGAAGAAGGAAGTGGGCAG  
GGCGTTCGTGGAAGTACTTCCATACCCTGCTGGCCCCGTTTTCCGGACGAGCCTACTCCTGAAG  
AAAGAGAGAACTGCACACGTTTATTGGGTGTATGCAGAACTCTATCCATGCGGGGAATGT  
TCATATCACTTTGTAAAGTTGATTGAGAAGTATCCCGTACAGACATCTAGCAGGACGGCTGC  
CGCAATGTGGGGATGCCACATTCACAACAAGGTGAACGAATACCTAAAGAAAGACATATATG  
ACTGTGCTACCATCCTGGAGGACTACGATTGTGGATGTAGTGACAGCGACGGTAAACGCGTG  
TCTCTCGAGAAGGAGGCTAAACAGCACGGTTGA

>YER145C 1.84 Hot

ATGCCTAACAAAGTGTTTAACGTGGCCGTTTTCTTCGTTGTGTTTCAGAGAGTGCTTGAAGC  
AGTGATTGTTATTTCCGTGCTGCTATCGTTTTTGAAACAGGCAATCGGGGAACATGACCGGG  
CGCTGTACCGTAAATTAAGGATTCAGGTTTTGGGTGGTGTGTTACTCGGGTTCATCATTTGT  
CTGGCCATCGGTGCAGGTTTCATCGGTGCGTACTATTTCGCTGCAGAAGGATATTTTCGGAAG  
CGCGGAAGACTTGTGGGAAGGTATCTTTTGTATGATTGCGACGATAATGATCTCGATGATGG  
GTATTCCTATGTTGAGAATGAATAAGATGCAGAGTAAGTGGAGAGTGAAGATTGCGCGGTCG  
TTGGTGGAGATTCCTCACCGTAAGAGAGACTATTTCAAGATTGGGTTCTTGAGTAGAAGATA  
TGCTATGTTCCCTTTTGCCGTTTATTACTGTCTTGAGAGAAGGTTTGAAGCTGTTGTGTTCCG



TTGCCGGTGCAGGTATTACCACACAGGGCTCGCACGCCTCTGCTTACCCATTGCCCGTTGTG  
 GTTGGTTTTGATATGTGGTGGTCTTGTGGGTATTTGTTGTACTATGGTGCCTCGAAATCCTC  
 GCTGCAGATTTTCTTGATTTTGTCTACTTTCGATCTTGTACCTGATCTCCGCCGGTCTTTTCT  
 CTCGTGGTGCCTGGTACTTTGAAAATTACAGATTCAACCTTGCCAGTGGTGGTGTGCTTCC  
 GAAGGCGGTGATGGTAATGGGTCTTATAACATCAGAAAGGCCGTTTACCATGTCAATTGTTG  
 CAACCCAGAACTGGACAATGGGTGGGATATCTTCAATGCTTGGCTTGGATGGCAGAACCCG  
 GCTACTTGTTCATCCATGCTTGTGTTACAACATCTATTGGTGGTCTTATCATTGTGTTGAGT  
 TTAATGATATTGGAAGAAAGGCGTGGTCACTTGCCTTTCACCAAAAACCTACAATTGAAACA  
 CTTGAACCCAGGATACTGGATCAAGAACAAGAAAAGCAGGAGTTGACGGAAGAGCAAAAAGA  
 GACAACCTGTTTGCCAAGATGGAGAACATCAACTTCAATGAAGATGGTGAGATCAATGTGCAA  
 GAGAACTACGAACTTCCCGAGCAAACCTACCAGTCATTCTCGTCTCAAAAACGTCGCCACAGA  
 CAAGGAAGTCTCCACGTTAAAGCCGACTCTCTTTGA

>YDL079C 1.61 Hot

ATGACCGATGTGTTGAGAAGCCTAGTGCGAAAGATTTCTTCAATAACTCAGATAACCTTCA  
 GCTAAAACACAAGACATCTATACAGAGTAATACTGCCCTAGAAAAGAAGAAGAGAAAGCCTG  
 ATACAATCAAAAAGGTAAGCGACGTTCAAGTTCACCATACTGTACCTAATTTCAATAACAGT  
 TCAGAGTACATCAACGCATAGAGAATCTTATAATATCTAAACTGATAGACGGGGGAAAAGGA  
 GGGTATTGCAGTTGATCACATTGAACACGCCAATATCTCGGACAGTAAAACAGATGGAAAAG  
 TTGCCAATAAGCACGAAAATATTAGTAGCAAGCTTAGTAAAGAGAAGGTTGAGAAAATGATT  
 AATTTTGATTATAGGTATATTTAAAACCAAGGAAAGGACTATTCATAAACGGGTTTATAAACA  
 TGACCGCAAAAACCTGATGTGCGACGAAAAAATCATGGAGGAACCTATCGACATCAGTTATCCTA  
 CGACAGAAGTGGTTGGCCATGGTTCATTTGGTGTGTTAGTACGACTGTAATAATTGAGACC  
 AATCAAAAAGTTGCCATAAAAGAAAGTACTACAAGATAGAAAGATATAAAAAATAGGGAGCTCGA  
 AACTATGAAGATGTTGTGCCATCAAATACTGTGGGTCTACAGTACTACTTTTACGAAAAGG  
 ACGAAGAAGATGAAGTATACCTCAATCTGGTTTTGGACTACATGCCTCAGTCGTTATACCAA  
 AGGCTTCGTCAATTTTGTAAATTTGAAAATGCAGATGCCGCGTGTGAAATTAATTTCTATGC  
 ATACCAACTATTCAAAGCTTTAAACTATTTGCATAACGTTCTCGAATCTGTACAGAGATA  
 TAAAACCGCAAAAACCTACTGGTGGATCCGACAACCTTTTTCTTTCAAGATTTGCGATTTTGGC  
 AGTGCCAAATGCTTGAAACCGGATCAGCCTAATGTGTCTTACATCTGTTCAAGGTACTATAG  
 GGCTCCCGAACTCATGTTTGGTGCCACTAATTACTCAAACCAGGTGCGACGTGTGGTCAAGCG  
 CTTGTGTCAATTGCTGAGTTGCTTTTGGGCAAGCCCTTGTCTCTGGTGAAAGCGGTATAGAT  
 CAGTTGGTGGAAATTTATTAAGATAATGGGCATACCCACAAAGGATGAAATTTTCAGGAATGAA  
 CCCAAATTTATGAAGACCATGTTTCCCAATATCAAGCCATTACTTTGGCTGAAATATTCA  
 AAGCCGAAGATCCCGATACTCTTGACTTGTTAACAAAAACTCTGAAGTATCACCTTGCAGAA  
 AGATTGGTACCTCTACAATGTCTATTATCAAGCTATTTTGGACGAAACCAAACGTTGTGATAC  
 CGACACTTACGTAAAAGCACAAAACCTGCGTATATTTGACTTCGACGTGAAACTGAGTTGG  
 GCCATGTTCCACTTGTGGAACGGCCCGCCATTGAAGAACGTTGAAACATTTTGTCTGCA  
 CCTTCATCGTCTTTGTGA

>YNL036W 2.33 Hot

ATGAGCGCTACCGAATCTTCATCTATATTACATTGAGTCACAACCTCAAACCTACAAGATAT  
 CTTGGCCGCAATGCCAAATGGGCCTCCAGATGAACAACATACAGCCAACCTTTGTTCCAG  
 ATCACAATGCGAAGGGCCAGTCCCCTCACACTCTTTTCATCGGCTGCTCCGATTTCGCGTTAC  
 AACGAAAACCTGTTTAGGTGTCTTGCCCGGCGAAGTGTTCACCTGGAAAAATGTTGCTAACAT  
 ATGTCACTCAGAGGATTTAACTTTGAAGGCCACTTTAGAGTTTGCCATTATTTGTCTAAAAG  
 TTAACAAAGTTATTTTGTGGCCACACTGATTGTGGTGGTATAAAGACATGTTTAACTAAC  
 CAAAGGGAAGCCTTACCAAAAAGTTAACTGTCTCATCTGTACAAGTACTTAGACGATATTGA  
 CACCATGTACCATGAAGAGTCACAAAATTTGATCCATTTGAAAACGCAACGTGAAAAATCTC  
 ATTACCTGTGCACTGTAACGTCAAAGGCAGTTTAAATAGGATTATTGAAAACCTACTGTG  
 CAAACTGCTGTACAAAATGGAGAATTACAGGTATACGGTCTGCTTTACAACGTAGAGGACGG  
 TCTACTGCAAAACAGTTAGCACTTACACAAAAGTTACCCCAAAATAG

>YDL131W 1.56 Hot

ATGTCGAAAATAACGAATTCAGAGTGTACCGAATCGACGACTGCTCCAACCACTAGTAA  
 CCCATATGGCCCAAATCCTGCGGATTATCTATCCAATGTTAAGAATTTCCAGTTGATTGATT  
 CAACACTAAGAGAGGGTGAACAATTTGCCAACGCATTCTTCGATACTGAAAAAAGATTGAA

ATTGCTAGAGCCTTGGATGATTTCCGGTGTGGACTACATCGAGTTAACCTCTCCCGTAGCATC  
 CGAACAAATCAAGAAAGGACTGTGAAGCTATATGTAAACTAGGTTTAAAGGCCAAGATCCTTA  
 CACACATTCGTTGTCACATGGACGATGCCAGAGTCGCCGTAGAGACTGGTGTGCACGGTGTG  
 GATGTTGTTATCGGCACCTCCAAATTTTTAAGACAATATCCCACGGTAAGGATATGAACTA  
 CATCGCCAAGAGTGCTGTTGAAGTCATTGAATTTGTCAAATCCAAAGGTATTGAAATCAGAT  
 TTTCTCTGAAGATTCCTTCAGAAGTGATCTCGTTGATCTTTTGAACATTTATAAAAACCGTT  
 GACAAGATCGGTGTAAATAGAGTCGGTATTGCCGACACAGTTGGATGTGCCAACCCAAGACA  
 AGTATATGAACTGATCAGAACTTTGAAGAGTGTGTCTCATGTGACATCGAATGCCATTTCC  
 ACAATGATACCGGTTGTGCCATTGCAAACGCCCTACACTGCTTTGGAAGGTGGTGCCAGATTG  
 ATTGACGTGAGTGTACTGGGTATTGGTGAAGAAACGGTATCACTCCTCTAGGTGGGCTCAT  
 GGCAAGAATGATGTTGCCGCACCAGACTATGTGAGATCTAAATACAAGCTGCACAAGATCA  
 GAGACATCGAAAACCTGGTCGCTGATGCTGTGGAAGTTAACATTTCCATTCAACAACCCCTATC  
 ACCGGGTTCTGTGCATTCACACATAAAGCAGGTATCCATGCCAAGGCCATTTTGGCTAACCC  
 ATCTACCTACGAAATCTTGGACCCTCACGATTTCCGGTATGAAGAGATATATCCACTTCGCCA  
 ACAGACTAACTGGTTGGAATGCAATCAAATCAAGAGTCGACCAATTGAACTTGAATTTGACG  
 GATGATCAAATCAAGGAAGTTACTGCTAAGATTAAGAAGCTGGGTGATGTCAGACCGCTAAA  
 TATTGATGATGTAGACTCCATTATCAAGGACTTCCATGCAGAATTGAGCACCCCACTTTTAA  
 AACAGTAAATAAGGGTACAGATGACGACAATATCGATATTTCCAATGGGCATGTTTCTAAA  
 AAGGCAAAGGTCACCAAATAG

>YBR051W 1.62 Hot

ATGCACATTCTTTTCTTGTATTTTTCCACTGTTTTGGCATTCAAAGACTTGATTTTTTTTTAA  
 GCAATACGTACCATTTGCAGCGGCGGGAGGATATCCCATATCGTTTTCTATTCATCAAAGTTC  
 TGACCGCCTCAACGAATTTACTACTTTTCTTCTCCTCTGGAGGGTCTTGAATAAGTTATCC  
 AAAGAGTCGCAATTACTCAAAGTCATTCTCACACACTTTCTTGTTCCTATTTTTTTTTTTCTT  
 ATTCCAATATATTTATTTATCAGAAGACAGACAGCAAGAACGACAGCCTAAGTTTTCGAGACA  
 ACGCTAAATTTGACGGACATGCGAAGACATGCCATATATAA

>YNL241C 2.22 Hot

ATGAGTGAAGGCCCCCGTCAAATTCGAAAAAAATACCGTCATATCTGTCTTTGGTGCCTCAGG  
 TGATCTGGCAAAGAAGAAGACTTTTTCCCGCTTATTTGGGCTTTTCAGAGAAGGTTACCTTG  
 ATCCATCTACCAAGATCTTCGGTTATGCCCGGTCCAAATTGTCCATGGAGGAGGACCTGAAG  
 TCCCGTGTCTACCCCACTTGAAAAAACCTCACGGTGAAGCCGATGACTCTAAGGTGCAACA  
 GTTCTTCAAGATGGTCAGCTACATTTCCGGGAAATTACGACACAGATGAAGGCTTCGACGAAT  
 TAAGAACGCAGATCGAGAAATTCGAGAAAAGTGCCAACGTCGATGTCCACACCGTCTCTTC  
 TATCTGGCCTTGCCGCCAAGCGTTTTTTTTGACGGTGGCCAAGCAGATCAAGAGTCGTGTGTA  
 CGCAGAGAATGGCATCACCCGTGTAATCGTAGAGAAACCTTTCCGGCCACGACCTGGCCTCTG  
 CCAGGGAGCTGCAAAAAAACCTGGGGCCCTCTTTAAAGAAGAAGAGTTGTACAGAATTGAC  
 CATTACTTGGGTAAAGAGTTGGTCAAGAATCTTTTAGTCTTGAGGTTTCGTAACCAGTTTTT  
 GAATGCCTCGTGAATAGAGACAACATTCAAAGCGTTCAGATTTTCGTTTAAAGAGAGGTTTCG  
 GCACCGAAGGCCGTGGCGGCTATTTCCGACTCTATAGGCATAATCAGAGACGTGATGCAGAAC  
 CATCTGTTACAAATCATGACTCTCTTGACTATGGAAAGACCGGTGTCTTTTGACCCGGAATC  
 TATTCGTGACGAAAAGGTTAAGGTTCTAAAGGCCGTGGCCCCATCGACACGGACGACGTCC  
 TCTTGGGCCAGTACGGTAAATCTGAGGACGGGTCTAAGCCCGCTACGTGGATGATGACACT  
 GTAGACAAGGACTCTAAATGTGTCACTTTTGCAGCAATGACTTTCAACATCGAAAACGAGCG  
 TTGGGAGGGCGTCCCATCATGATGCGTGCCTGTAAGGCTTTGAATGAGTCCAAGGTGGAGA  
 TCAGACTGCAGTACAAAGCGGTGCGATCGGGTGTCTTCAAAGACATTCCAAATAACGAACGTG  
 GTCATCAGAGTGCAGCCGATGCCGCTGTGTACCTAAAGTTAATGCTAAGACCCCTGGTCT  
 GTCAAATGCTACCCAAGTCACAGATCTGAATCTAACTTACGCAAGCAGGTACCAAGACTTTT  
 GGATTCAGAGGCTTACGAGGTGTTGATAAGAGACGCCCTACTGGGTGACCATTCCAACTTT  
 GTCAGAGATGACGAATTGGATATCAGTTGGGGCATATTCACCCCACTTACTGAAGCACATAGA  
 GCGTCCGGACGGTCCAACACCGGAAATTTACCCCTACGGATCAAGAGGTCCAAGGGATTTGA  
 AGGAATATATGCAAAAACACAAGTATGTTATGCCCGAAAAGCACCCCTTACGCTTGGCCCGTG  
 ACTAAGCCAGAAGATACGAAGGATAATTAG

>YJR075W 1.72 Hot

ATGGCCAAAACAACAAAAAGAGCCTCCAGTTTCAGGAGGTTGATGATATTCGCCATAATAGC  
 CCTCATCTCATTAGCATTGGAGTTAGATACCTATTTACAATTCTAATGCTACTGATTTAC  
 AAAAAATTCTGCAGAACTTGCCCAAAGAGATTTCCCAAAGCATTAAATAGTGCCAACAATATT  
 CAGAGTTCGGATTCTGATCTAGTTCAACATTTTGAGAGTTTGGCTCAGGAGATCAGACACCA  
 ACAGGAAGTTCAAGCAAAGCAATTTGATAAAACAACGTAAGATCCTGGAAAAAAAAATCCAAG  
 ACTTGAAACAAACACCTCCGGAGGCCACCCTAAGAGAACGCATAGCTATGACTTTCCCTAC  
 GATTTCCCATGTCAAGTTCCAGCATTTATTTGGCAAACCTGGTCCAATGATGAAGGTCCCGA  
 GCGTGTTCAGATATAAAGGGCATGTGGGAAAGCAAGAATCCGGGCTTTGCGCACGAAGTGT  
 TGAACCATGACGTGATAAACGCCTAGTACCCACTACTTCTACTCCATACCGGAAATCCTA  
 GAGACTTACGAAGCTCTGCCCTCCATCATCTAAAGATAGATTTTTTCAAATACTTAATACT  
 GTTAGTTCATGGAGGTGTTTATGCTGACATCGACACGTTCCCTGTTAGCCAATTTCAAACCT  
 GGATTCCTGAAGAGTTGTGCGCCATCCGACATTTGGGTTGATAGTTGGAGTTGAGGAAGACGCT  
 CAAAGAGCTGACTGGAGAACCAAGTATATCAGAAGACTTCAGTTTGGTACTTGGATTATACA  
 AGCAAACCTGGTCACCCTGTTTGGAGGGAAATCATTCTCGAATTATTGAGACCACTTTAC  
 AGAGAAAGAGGGACGACCAACTAAACGTCAATCTAAGGAATGATCTGAATATTATGAGTTGG  
 ACGGGTCTGGGTTGTGGACTGACACTATTTTACGTATTTCAATGACTTTATGAGAAGTGG  
 TGTGAGGGAGAAGGTTACATGGAAATTATTCCATAACCTAAATCAACCAAATTTGCTAAGTG  
 ATGTTCTGGTCTTTCCAAAATTTCTCTTTAACTGTCCAAACCAAATCGATAATGACGATCCA  
 CACAAGAAATTTCTATTTCACTACTATTTGGCATCACAATTTTGAAAAATACTCCAAAGGT  
 GGAGCAGAAATAA

>YDR187C 2.63 Hot

ATGAAACGGTTCGCTTGTCTAAGCAATTCACCCACAAGACACACAACCGTTCGTGGTCCCATC  
 GCCCGTGATTTTCATCCTGCGCGGCAGCTGCCCTAGCAATCAGTACCGCTGTAGGCGACTGGA  
 TCTGCATCTCGGTCAGCAACACTTTACCGTCCCTGGTTCAGCTTGATGTTACCAGCACCATCC  
 ACAAGCATCTTTAGCGTGCCCTTAGGGCCCAAGTTGGTCTCTAGGACGGATTGTAAGCCCTC  
 AGCAGATGTGACGTTAACCTTCAAAGCCGCATCCCTTCTCAACGATTCAGCCTTCGGATTCA  
 ACAATTGCAATGACATGCTTCTACTCTACTTATATTATAATCTTCTGCTTCTCACTGCTTCC  
 ACACCCTTAACCTTTACCTTTTCCACACACTGCACACATACACTGTTATACATAATCCTTTT  
 CGTCTTTTCGTTTCGTTTCTTACCAGAATAACAACCTACTAACACATCACCGAGCGAAAATTTG  
 CCACCAAAGCAAACTCCCGTAA

>YGR155W 2.13 Hot

ATGACTAAATCTGAGCAGCAAGCCGATTCAAGACATAACGTTATCGACTTAGTTGGTAACAC  
 CCCATTGATCGCACTGAAAAAATTCGCTAAGGCTTTGGGTATCAAACCACAAATTTATGCTA  
 AGCTGGAACATAACAATCCAGGTGGTTCCATCAAAGACAGAATTGCCAAGTCTATGGTGGAA  
 GAAGCTGAAGCTTCCGGTAGAATTCATCCTTCCAGATCTACTCTGATCGAACCTACTTCTGG  
 TAACACCGGTATCGGTCTAGCTTTAATCGGCGCCATCAAAGGTTACAGAATATCATCACCT  
 TGCCGAAAAAATGTCTAACGAGAAAGTTTCTGTCTTAAAGGCTCTGGGTGCTGAAATCATC  
 AGAACTCCAACCTGCTGCTGCCCTGGGATTCTCCAGAATCACATATTGGTGTGCTAAGAAGTT  
 GGAAAAAGAGATTCCCTGGTGTGTTATACTTGACCAATATAACAATATGATGAACCCAGAAG  
 CTCATTACTTTGGTACTGGTTCGCGAAATCCAAAGACAGCTAGAAGACTGAATTTATTTGAT  
 AATCTACGCGCTGTTGTTGCTGGTGTGCTGGTACTGGTGGGACTATTAGCGGTATTTCCAAGTA  
 CTTGAAAGAACAGAATGATAAGATCCAAATCGTTGGTGTGCTGACCCATTTCGGTTCATTTT  
 CCCAACCTGAAAACCTGAATAAGACTGATATCACTGACTACAAAGTTGAGGGTATTGGTTAT  
 GATTTTGTTCCTCAGGTTTTGGACAGAAAAATTAATTGATGTTTGGTATAAGACAGACGACAA  
 GCCTTCTTTCAAATACGCCAGACAATTGATTTCTAACGAAGGTGTCTTGGTGGGTGGTCTT  
 CCGGTTCTGCCTTCACTGCGGTTGTGAAATACTGTGAAGACCACCCTGAACTGACTGAAGAT  
 GATGTCATTGTTGCCATATTTCCAGATTCATCAGGTCGTACCTAACCAAATTCGTGATGA  
 CGAATGGTTGAAAAAGAACAATTTGTGGGATGATGACGTGTTGGCCCGTTTTGACTCTTCAA  
 AGCTGGAGGCTTCGACGACAAAAATACGCTGATGTGTTTGGTAACGCTACTGTAAAGGATCTT  
 CACTTGAACCCGGTTGTTTCCGTTAAGGAAACCGCTAAGGTCCTGATGTTATCAAGATATT  
 AAAAGACAATGGCTTTGACCAATTGCCTGTGTTGACTGAAGACGGCAAGTTGTCTGGTTTAG  
 TTAATCTCTCTGAGCTTCTAAGAAAATCAATCAATAATTCAAACAACGACAACACTATA  
 AAGGGTAAATACTTGGACTTCAAGAAATTAACAATTTCAATGATGTTTCTTCTTACAACGA  
 AAATAAATCCGGTAAGAAGAAGTTTATTAATTCGATGAAAACCTCAAAGCTATCTGACTTGA

ATCGTTTCTTTGAAAAAACTCATCTGCCGTTATCACTGATGGCTTGAAACCAATCCATATC  
GTTACTAAGATGGATTTACTGAGCTACTTAGCATAA

>YLR314C 1.52 Hot

ATGAGTTTAAAGGAGGAACAAGTGTCCATTAAGCAGGACCCGGAACAAGAAGAGCGTCAGCA  
TGATCAATTCAATGATGTTTCAGATCAAACAAGAGTCGCAGGATCATGATGGAGTGGACTCGC  
AGTACACGAACGGTACGCAAAATGACGACAGCGAGAGATTTGAGGCAGCTGAATCCGATGTA  
AAGGTGGAACCCGGCCTCGGTATGGGCATCACCTCCTCTCAGAGCGAAAAGGGTCAAGTTCT  
GCCTGACCAACCGGAGATTAAGTTCATTCGTCGTCAAATCAATGGTTATGTAGGGTTTGCTA  
ATTTGCCCAAGCAATGGCACAGAAGGTCCATAAAGAACGGATTTCAGTTTCAATCTCCTATGT  
GTCGGCCCTGATGGTATTGGTAAGACAACCTTAAATGAAAACCTTATTTAATAATGATGATAT  
TGAGGCCAATTTAGTGAAAGATTACGAGGAGGAACTTGCAAATGATCAGGAAGAAGAGGAGG  
GTCAGGGCGAGGGTACGAGAAACCAATCACAAGAACAAAGGCACAAGGTCAAATTAAGTCA  
TATGAGTCGGTTATTGAAGAAAATGGTGTAAACTGAATTTGAACGTGATCGATACTGAAGG  
ATTTGGTGATTTTTTAAATAATGATCAAAAAATCATGGGACCCGATCATTAAGGAGATTGACT  
CTCGTTTTGATCAATACTTGGATGCGGAGAACAATAACAGACATTCATAAACGATAAAA  
AGAATCCATGCATGTCTTTATTTTCATTGAACCTACAGGACATTACTTAAAGCCCTGGACCT  
GAAGTTTATGCAATCTGTATATGAAAAATGTAACCTTGATTCCTGTTCATTGCTAAATCTGACA  
TCTTAACTGATGAAGAGATCTTAAAGTTTCAAGAAGACCATTATGAACCAGTTAATCCAATCT  
AATATCGAGCTGTTCAAGCCTCCAATTTATTTCCAACGATGATGCAGAAAAATAGCCATTTATC  
CGAAAGACTATTTAGTAGTTTACCTTATGCTGTTATTGGTTCCAACGATATTGTAGAGAACT  
ACAGTGGAATCAAGTGAGAGGCCGTTTCTATCCATGGGGGGTGATCGAAGTGGACAATGAC  
AACCCTCTGATTTCAACCTTTTGAAAAATTTATTGATCAAGCAATTCATGGAGGAATTA  
GGAAAGGACAAGCAAGATACTATACGAAAACTACAGGTCTTCTAAATTGGCAAAACTTGGTA  
TTAAGCAAGATAATTCAGTTTTCAAGAGTTCGATCCAATATCTAAACAACCTAGAAGAAAA  
ACTTTACATGAGGCAAACTAGCCAACTAGAAATTGAAATGAAAACAGTTTTTCCAACAAAA  
AGTTTCCGAAAAGGAGAAAAAACTACAAAAATCAGAAACTGAATTGTTTGTAGACATAAAG  
AAATGAAGGAAAAATTAACATAAATAAAGCTTTGGAGGACAAGAAAAAACAGCTAGAA  
CTTTCAATAAATAGTGCTTCTCCAATGTTAACCCTCCCCCGTCCCTACAAAGAAGAAGGG  
ATTTTTACGTTAG

>YMR262W 1.61 Hot

ATGAATAAACTTGTGATGCCCACTGTCATGTTATAACCGACCCAGACAACACATTCTGCGG  
TGATGATGGAGGGTCCCAGGGTACGTTGCGTTGCGTTATGTCATCAAACCCATATGACTGGA  
ACAATTTGAAAAAATTTGGCTGGCAGAAGCACAAGTAAAAACGATATATGCGTGGGATTTGGT  
GTGCATCCTTGGTACAGCCACTTATTTTTATGTGGGAAGTCGGCGGACAAGTTTTCTACTA  
TCAAGATGTACTGGAGTATAAGAATGAAGAACAGTTTCGACAGTTTGGTTCAGGTGCTTCCCG  
AACCTCTAGATCTTGAAGAGTATATAAAAAGAGAGTTTAAACGACACTTTGGTTAGTGTGATT  
GGAGAAATCGGCTTTGATAAGCTCTTCAGACTTCCTGCAAATGGTTTCTACATGCAGAACGA  
GAAGGCAAGGCTTACGACAGTGAAGGTCAAACATATCGCATCAAGAAACAGTATTCAGGCGAT  
TTTGGCGACTGGCAAGGCACACAAGCAAGCCCATCTCTATACACGATGTAAAGTGCCACGGG  
AAACTAAACGATATCTGCAATGAAGAGCTCTTGACGTATCACTCTGTCAAGATATGTTTACA  
TTCGTACACAGGCTCCAAGGAAACGCTTCTGGGCAATGGCTCAAGAAGTTTCCCCCGGATC  
GTATTTTTGTGAGCCTATCCAAATGGATTAATTTTAAAGACCAGAAAGAGGGAGATGCCCTG  
GTCAGGAGCTTGCCCTCAACTGCATACTTACTGAAACCGACTATCCTATTGACAATCCAGA  
TCCGTCATAACAAAAGGCCCTTACAGAGCAGCTGCAGTATTTGAATGCACAAATCGCACGAG  
CATGGGACGAGACACTGGATGCCTCACAAGCCGCTTTGCGTGTATACGAAAACCTTTCAGAAA  
TTTATCAAGTGA

>YAL037W 1.72 Hot

ATGGATATGGAAATCGAAGATTCAAGCCCCATAGATGACCTGAAGTTACAAAACTGGATAC  
CAATGTTTTATTTGGACCCTGTGAGATATTGACACAACCTATTCTTTTGAATATGAAAATA  
TTAAGTTCATCATTTGGTGTCAATCTAAGTACTGAAAAGATAGCGTCGTTTTATACCCAGTAT  
TTCAGGAACTCTAATTCGGTAGTCGTGAATCTTTGCTCACCAACTACAGCAGCAGTAGCAAC  
AAAGAAGGCCGCAATTTGATTTGTATATACGAAACAATACTACTACTACAGAAATTCGTTG  
GACAGTACTTGCAGATGGGCAAAAAGATAAAAACATCTTTAACACAGGCACAAACCGATACA  
ATCCAATCACTGCCCCAGTTTTGTAATTCGAATGTCCTCAGTGGTGAGCCCTTGGTACAGTA

CCAGGCATTCAACGATCTGTTGGCACTCTTTAAGTCATTTAGTCATTTTGGAAATATCTTGG  
 TTATATCATCACATTCCTATGATTGCGCACTTCTCAAATTTCTTATTTCCAGGGTGATGACC  
 TACTATCCACTAGTGACCATCCAGGATTCTTTGCAATATATGAAAGCAACCCTGAACATATC  
 CATCAGTACATCCGATGAGTTCGATATTCTGAATGATAAAGAACTGTGGGAGTTTGGCCAAA  
 CCCAGGAAATTTCTAAAACGTAGGCAGACGAGCTCAGTCAAGAGGAGATGTGTCAATTTACCA  
 GAAAACCTACGATCGATAACAGAATGCTTATGGGTACCACAAAGCGAGGTCGCTTTTGA

>YDR275W 1.64 Hot

ATGTTTTTTTTTCCCGAAGCTTAGAAAACCTTAGAGTTCAACTGTGATCGATCAGGATACCAA  
 GAACTCATCAGGAAAGGAAGAGATCATGTCAAATAGCCGATTAGCACTTGTTATTATCAACC  
 ACGCCTTTGATAAGGTAATCTTTGACGTGGCACTGCGGGATATTATCCGAAATAAGATCA  
 GGACTGATGTTAATGTTTGGCATTTCAGTTGATGTGCTCTTTGGGTGTCATCGTATTGCT  
 GTTGCCTATTATCATACTGGACGCGATCGATCTATTCCCTCTACATGTGCAGGTTGCTTGATT  
 ACGGTTGCAAGTTATTCCACTACAATAGATCATCATTACCGGTGGCAGATGGAAAAGAAAAG  
 ACCAGTGGTCCCATAAGCGGAAAGGAGGAAAAGATTATTGATGAGGAGATAATTAATATGCT  
 AAATGAATCCTCAGAATCATTGATCAATCATACTACAGCTGGTCTGGAATATGATATTAGTT  
 CAGGTAGTGTAAACAAAAGTAGGCGTTTTGAATTCAACTAGTACAGTTACATTTGTGAAGCAG  
 AATAAECTTGTTAATGAAAGGAGGGAAGACGCCTACTACGAGGAAGAGGATGATGATTTCT  
 ATCAAATCCGAATTATGATAAGATATCATTGATCGAAAAATCATTACAGAGTCGTTTTGAAG  
 TGGCTTGTGAGCAGAAAGCTGCTTAA

>YLR327C 1.79 Hot

ATGACCAGAACTAGCAAATGGACAGTCCACGAAGCAAAGTCTAACCCAAAGTATTTACCCCA  
 TAACGGCAACTTTGGGGAGTCTCCAACCACGTCAAGAGAGGAGGCTATGGGAAAGGCAATT  
 GGGGCAAGCCTGGCGATGAGATTAATGACTTAATCGATTCTGGCGAAATTAAGACAGTCTTC  
 AACAGACCAGAAGGGGCTCTAACTCCCAAACAATGAAAGAAGGCTTTCTGATTTGCAACA  
 ATACCACATCTAA

>YJL122W 1.52 Hot

ATGCCTTCTAAAACTCCATCAACAGACCTAAGCTGACTTCAAATTTGCACCACAAGGTGCA  
 CTCTTTAAATAAGAAAAGAGCTCAAAGAGAAAAGAGCTGGTCTCTTGAAGCCAGCTAGATCCA  
 GCGTAAATTCGAAATCTGGGGAAATAAAATCAGTAGCGTTGGACCTATACTTCCAAAACAAG  
 AAGAACGAAAGTCAGAATTCACCTGCTGTGACATTACAAAATGCTTCATCTTCTCCGGCCTC  
 CATCACACGAGGACACTTTCCAAAAGAGAGCTAAGAAAATCGAGAGAACTTAAAATATG  
 CTACACAGAGAAAATTAATGGTTGACGCAAGCGCTAAGCTAGAAGACGAAATGGATATTGAT  
 CTAGATGGCGGTAAGAAAGTGAAAGAGAATGAAAAGAAGAGTTCTTTGACTTTGGTTAAGGA  
 AGCCTTATGGAGTGTCAATTGACGATACTGCATCCCAGGGATTGATCATCGAAAACGGACAAG  
 GCACCACCCTGGGCGGCCCATTTTTCCCATGA

>YIL065C 1.92 Hot

ATGACCAAAGTAGATTTTTGGCCAACCTCTTAAGGACGCATACGAACCACTCTATCCGCAGCA  
 GCTGGAGATTCTGCGCCAGCAAGTCGTCTCCGAGGGGGGGCCACCCTACCATACAGTCAA  
 GGTTTAACTACGCATGGGGGCTGATCAAATCCACTGACGTGAATGACGAAAGGCTTGGTGTG  
 AAAATCCTCACAGACATTTACAAAAGAGGCCGAGTCCCCTAGACGAGAATGCCTATATTTATCT  
 GACCATAGGTTGCTACAAACTCGGTGAATACTCTATGGCGAAGAGATATGTAGACACTTTAT  
 TTGAGCATGAGCGTAATAACAAGCAGGTGGGCGCTTTGAAGAGTATGGTAGAGGATAAGATC  
 CAGAAGGAAACACTCAAGGGTGTGTGTCGCTGGAGGCGTACTAGCCGGCGCTGTGGCCGT  
 GGCTAGTTTCTTCTTAAGAAAACAAGAGAAGGTAA

>YPR123C 1.61 Hot

ATGTCCATATCCATCCCTGAAGAGCTACTGTTATCAGACGATGACATACCTGACATGCCTGA  
 CATGCTAGAATCAGAAGTTGTCTGTGCACTGGCGGAGCTTGTTGGTGTACTGCTCATCGACA  
 TAGACATACCTGACATTGAACTGCTTCCCATCGACATACTTGCCATTGACGACATAGTCGAC  
 GCCAACGTTTTGCTCGCACTGGACATCGCTCCATGCTCATCGATGACATGCTCGATAATAT  
 CGTTTTGCTGGCACTAGACATCGCATCCATGCTCATCGACGCCATACTCGATGCTACTGTCT  
 TGGATGCACTAGACATGGCGTCCATATTCATGCTGCTACCCATATTCATACCTTCCATTTG

AATGTCAAATATAATACACTTTTTTTTTATTTTCTATTTCGATTCTTCCAACAAATGTAATTTG  
A

>YJR070C 1.69 Hot

ATGTCTACTAACTTTGAAAAACATTTCCAAGAAAACGTCGATGAATGCACTCTAGAGCAACT  
AAGGGACATCTTAGTCAACAAGTCCGGCAAAAACAGTTTTGGCCAACAGATTTAGAGCTCTGT  
TCAACTTAAAGACTGTTGCTGAAGAATTTGCCACTAAGCCAGAGGAAGCCAAAAAGGCCATC  
GAATACATTGCCGAATCCTTCGTCAATGACAAGTCTGAGTTGTTGAAGCACGAAGTGGCCTA  
CGTGTGGGTCAAACCAAGAACTTGGACGCTGCTCCAACTTAAGACACGTTATGTTAGATC  
AAAATCAAGAACCAATGGTGAGACACGAAGCCGCTGAGGCTTTGGGTGCCCTAGGTGACAAG  
GATTCGTTGGATGACCTAAATAAGGCTGCTAAGGAGGATCCACACGTTGCTGTGAGAGAAAC  
CTGTGAAGTGGCCATTAACAGAATCAACTGGACCCATGGAGGTGCCAAGGATAAGGAAAAC  
TGCAACAATCCCTATACTCGAGTATTGACCCAGCCCCACCTCTACCATTAGAAAAGGATGCT  
ACCATCCCAGAACTACAGGCCTTATTGAATGATCCTAAGCAACCTTTGTTCCAAAGATACAG  
AGCCATGTTTCAAGTCTGAGAGATATCGGTACTGATGAAGCAATCCTGGCCTTGGCCACTGGTT  
TCAGTGCAGAATCCTCCCTTTTCAAGCATGAAATCGCCTACGTCTTCGGTCAAATAGGTAGT  
CCGGCTGCTGTCCCAAGTTTGATTGAAGTTTGGGCAGAAAAGGAAGAAGCTCCAATGGTTAG  
GCATGAAGCTGCTGAAGCCTTGGGTGCCATTGCTTCTCCAGAAGTTGTGACGCTTGAAT  
CTTACCTCAACGATGAAGTCGATGTCGTGAGAGAATCTTGTATCGTTGCGCTAGATATGTAT  
GATTACGAAAACAGCAACGAACTAGAATATGCTCCAACCTGCTAATTAG

>YBR267W 1.85 Hot

ATGAGTAGCAGTGGTGTTTATACGTGTAATTCATGTGTCTGACCTTTGATTCAAGCGACGA  
GCAGCGGGCCACATGAAGTCCGATTGGCATCGCTACAATTTGAAAAGACGTGTTGCACAAT  
TGCCACCAATATCATTGAGACATTTGACTCCAAAGTGTCTGCAGCTGCTGCCAGTACTAGT  
AAGTCTGCTGAAAAGGAGAAAACCTGTTACCAAAAAGGAGTTGAAAAGAAGGGAAAAGCAAGC  
ATTGCTCGAAAAGAAAAGAAAACCTGTTGAAAATTGCCAGGGCTAATATGCTTGAAAACATGC  
AAAAGAGCCAAGAGGGAAATACTCCCAGCTAAGCAAGCTCTCTTTGCAAGAAAATGAGGAG  
AACAAAGAAAAGGAAGAACCTAAGAAGGAGGAGCCTGAACAGTTGACCGAGGAAGAAAATGGC  
GGAAAGAGTAATGCAAGAAAACGTACGCAACAGAGTCGATATCCACTGGAACAATGTCTAT  
TTTGTGAGCACAATAAGCACTTCAAAGATGTTGAAGAAAACCTGGAACACATGTTTAGGACC  
CACGGTTTTTATATCCCAGAACAGAAATATCTAGTCGACAAGATCGGCTTGGTAAAATACAT  
GTCGAGAAAGATTGGTCTTGGGAACATTTGTATTGTTTGTAAATTACCAGGGGAGAACGTTGA  
CCGCTGTAAGACAGCACATGTTGGCAAAGAGACACTGTAAAATTCCTACGAAAGCGAGGAT  
GAAAGGTTGGAGATATCTGAATCTACGATTTTACAAGCTCATAACGAAACTTTAATAGCAA  
CACAAACACCAGACAACGAAGATGACTGGGAAGACGTGGGCAGCGACGAAGCCGGAAGCGACG  
ACGAAGATCTGCCACAAGAGTACTTATATAACGATGGTATAGAGCTGCATCTACCAGACAGGC  
ATCAAAGTTGGCCACAGGTCTTGCAAAAGATACTACAAGCAAGACTTAAAGCCGAGGTGAT  
ACTGACCGAAGGCCAAGGTACCTGGTGCCTGCAGAGACGAGATCGTTCTTACCTGCCTTCG  
ACAAAAGGGCGTGCAGACTCAACAGCGTGTGGCAAACCTGAGAGGTTGACAAGAAAAGG  
CTCGATAAGAGAAGTGCCAAGTTCGTCAATAACCAACCACACTACAGAGACCAACTTCTGCA  
GTAA

>YGR068C 1.51 Hot

ATGTTTTCACTTAGTTCGCTATCTAGCAGCGGTGGGCATTCAGAGCAGAAGGAAAGAGAGAG  
AATAAGTTATTTGATATTAGAATAAACTCCCCGTACAAGGACATAATTTGATCCAAGGGT  
CACCGTTGGAAGTGTCTGCTATACCTTTATCAGGAAACTTAGTGATTTTCAGTGAAAAATGAG  
ATCGTAGTGAAGAAAATTTGCTGAGATTGGTAGGAAGATTCAAATTTGGAGTTTTTTCGAAGT  
TGGCCGATATAAGAAGAATAGCAGTAGTTTGGCAAAGTCTAGTTAAGGAAAAGCGTAAGATTT  
TCGAATGCTATTGGGACAACCTTATTGGTTTTCTCAAAGGGGATGTTTTAGTTCGGTGGGGAA  
AATGCGGAAAATCAACATAACAGTAGTAGCGGTTCGAGTACAAGCAACCAAGATATGGACAC  
CAGCGGCAACGCAATATTTCTAAGCAAGAGATCACTTTTCGAGCCCTGTTTTCAACAAAATAA  
TTCGAAGAAAGACCCATTCTTCCCACAGAAAATACTAGAGCTACCAGAAAATGGTGTTACA  
GGAACCCCTTTTCGAGGGTTTTAAGAGAAAACGCCCCGTAGTAGAAGCAGTAGTAGTAACCCCT  
CAATAACAATAGCCATAGTTATAGTAACAGAGACGGGTCTGGAAGTTTCGTACTTATTCTTAA  
TGAAAAGAGGCAACTACGAACTACCCTTCAATACAATGCTCCCCCAGAAGTGTGCGAAACA  
ATCGAGGGACTACAAAGTGGTAGCATACTGTATTCTTTGAAGCCATTATAGATGGACGTCA

GTTATGGGATACTGATCTGAGCGTTCATACTTCTCCTCACGGTCCAATCGGTAGCACAAGTACGAGCGGCAATGGTATGAGAACGAAGAATAAAATTATCATCAAAAAGTTCAGTATCTCAGATCCTTCGTACATTATCGATGGACAATCTTGCCATGCAAGAAGAAATTAGCGTGGGTAATAC TTGGCGTGACAAGTTGCAATACGAAACGTCCATCCCGAGTAGGGCTGTTCCCTATTGGTAGCA CAACCCCGTGAAGATTAAGATTTTCCCCTTCGAAAAGAACATTCGTTTGGATAGGATAGAA ATGGCGCTAATCCAATATTACGCAATGAAGGACAGCAGCGCACAAATTTATGATGATGAAAT AGCCGTCATGAAAATTACTCATCTAGCGGACTTCGGCCCCTGACGGACAACTTGACGTCG ATTGTCCCTTTACAATTCAGATAACCTCAAACAATAAATCAAGACTGCTGTCTGCAAGAC AACCTAATCCGTGTCATGCACAAATTGCAGGTACGTATTCTTTTACAACGTCAAGTGGATGG CGAATAACAAGAACCCTGGAGATCAAGGCGCAATTACCTATGTTATTATTTATTTTCGCCGCATC TGCTATGAAAGGCCGTCTAGTGTGTTTGGATAAACACGATGGCAAGATCCACTTCCGCCCT GCGAATTAGTACCCCTTTTTTTAACCCTTACCCCGCGCAGGGTCTGACTCCAGGCGTTGA ACTGAACTCCACTACAACGGCGCACCTCGCGCTGCCACAACCGCCACCGAATTATCACGAGA GCACCAACGATCATCTCATGCCGGCGCTACAGCCGCTCGGCGCCGATTCGGTGGTACTGACA GTGCCGTCATACGAGCAGGCGCAGGCGCAGGCATCGGCATCGTCTTACGTGACAGGGTCCGT ACCCGCTTACTGCGACGATGACTGA

>YLR234W 1.5 Hot

ATGAAAGTGTATGTGTGTCGAGAGAAAAATTCATAGCGAAGGCAGTTTCACAGATCCTAGG AGGAGGCAGATCAACTTCAAGGGATTCCGGCTACATGTATGTAAAGAACTATGATTTTCATGT TTAGTGGGTTCCCGTTTTGCCAGAAATGGGGCTAACTGCGAAGTTACCATGACTAGTGTGCA GGGCACCTAACAGGCATTGATTTTCAGCCATGATTCGCATGGGTGGGGAAAAATGCGCCATCCA AGAGTTATTTGATGCGCCACTGAACGAGATTATGAATAACAACCAAAAAAGATAGCAAGCA ACATCAAGCGAGAAGCGAGGAATGCAGACTATCTGATGATATGGACAGATTGCGACCCGGGAA GGAGAGTACATCGGTTGGGAGATATGGCAGGAGGCCAAGAGAGGCAACAGGCTCATACAAAA TGATCAAGTATAACGGGCAGTCTTTTTCGCATCTCGAAAAGACAACACATATTAATGCAGCAC GAAACCCAAGTCGATTGGATATGAAGAGTGTGCACGCTGTAGGCACGCGGATTGAAATCGAT CTTTCGAGCAGGTGTTACATTCACCAGACTCTTAACAGAAACGCTACGAAATAAACTGAGAAA CCAAGCCACCATGACCAAGGATGGTGCAAAACACCCGCGGTGGTAACAAGAACGACTCACAAG TCGTATCGTATGGTACATGCCAGTTTTCCAACGCTCGGCTTTGTAGTAGACAGGTTTGAAAGA ATACGAAATTTTGTTCCCGAAGAGTTCTGGTATATCCAATTGGTAGTCGAAAACAAAGACAA CGGCGGAACAACAACGTTCCAGTGGGACAGGGGCCACTTGTTCGACCCGCTGAGCGTGTAA CGTTTTTACGAGACATGCATCGAAACCGCCGGCAATGTTGCTCAAGTAGTAGACTTGAAATCA AAGCCAACAACGAAATACAGACCTTTACCTCTGACCACAGTGGAGCTACAAAAAACTGCGC CCGGTACCTGCGTCTGAACGCCAAACAATCACTAGACGCAGCAGAAAAGCTATAACAAAAGG GGTTCATATCGTATCCAAGAACAGAGACTGATACTTTCCACACGCAATGGACCTAAAATCC TTGGTTCGAAAAGCAAGCTCAATTGGACCAACTCGCTGCAGGCGGCAGAACCCTGGGCATC GTACGCGGCATCGCTGCTCCAACCCGAAAACACAAGTAACAATAACAAGTTCAAGTTCCAC GAAGCGGCTCCCATGACGACAAAAGCGCATCCACCAATCCACCCCATCGTAAGTCTGGGGCCT GAAGCAAATGTTTCGCCAGTGGAAGAAGAGTATACGAGTACGTGGCCAGGCACTTTTTGGC ATGCTGCTCAGAGGACGCCAAGGGCCAATCGATGACCCTTGTGTTGGACTGGGCCGTTGAAC GTTCTCAGCTTCAGGTCTCGTAGTCTTAGAGAGAAATTTCCCTCGATGTTACCCTTGGGCC CGATGGGAAACCACCAAGCAGTTACCGCGGCTTGAAATGAATGCCCTCGTAGACATCGCGAA GGCCGAAATGAAGGCGGGCACTACGGCGCCGCCAAGCCGATGACTGAGAGTGAACCTCATTC TCCTCATGGATACAAACGGCATTTGGCACAGACGCCACCATTGCGGAGCACATAGACAAGATC CAAGTACGTAATTACGTTAGGAGCGAGAAAGTAGGCAAGGAAACCTACTTACAACCCACGAC CCTGGGTGTCTCACTAGTGCACGGCTTCGAGGCCATCGGCCCTCGAAGACTCCTTTGCAAAGC CCTTCCAGCGCAGAGAAATGGAGCAAGACCTCAAGAAAATCTGCGAAGGTCATGCCTCCAAG ACTGATGTTGTAAAGGACATAGTCGAGAAGTATAGGAAGTACTGGCACAAGACGAATGCCTG CAAGAATACTCTTTGCAAGTTTATGACCGTGTCAAGGCATCCATGTAA

>YFR035C 2.09 Hot

ATGAGCGCGAGTGACAAAACAAAGCTCTGCAATAAGGGCATGAGCAGGACATCGCGAACCAC AACTTTCGTAATCACACCCGCTTCCGTGAGAGAGACGATGAGGGTGCCAATTCCTGTGTA AAGCTTCTTGAACACTTCTCGAACCTCAAATCAGGTATGTTCAAATGTTTGTGGGAGTT GCGCCGTTAGGTACGTTCAATTTCTACGTTCCACAGTTTTTCTTGTGCTGCCCTTCTTTG

CGTACGGTGTGTATGTGTATGTCTGTGTGCAAGTATTTCCCTATGCTGCAAGTGCATTTTCT  
CGTTTTCTATTTTTTTTTTTTTTTTTTGCCTCGCCTAA

>YBR219C 1.72 Hot

ATGACATTGTTAAATACCCTCAGCAACTTCGGTGGGACATGGCCGCGGTTAATCATTATGTC  
CATGATCAACTACTTCACCGTGTATCAGTGCCTATTCTGGCACAAATAAAGTATACGTAA  
CTCACGGCGGCAGCATGCAAGCGTGCACCGAGCTTTTGAATGGCACCGTGACCATCTGCGT  
GACGGCTATTACATACCAATCTCATATGTATTGTAGTGGACTTTTCTATATTTTGGATA  
TTTGAAGGAAAATCCTCCATTTACAAAGTCTGCCAATCAGTTCCTGGAGATTTTTTCATT  
TTTTTTTTTACAATTTTGGCAGTTACGTCTCGAGCTATTTATTATAAGAGTCAGAATTGGCGC  
AGGGAGTGTTAA

>YBR072W 1.75 Hot

ATGTCATTTAACAGTCCATTTTTTGGATTTCTTTGACAACATCAACAACGAAGTTGATGCCTT  
TAACAGATTGCTGGGTGAAGGCGGCTTAAGAGGCTACGCACCAAGACGTCAGTTAGCAAACA  
CACCCGCAAAGGATTCTACTGGCAAGGAAGTTGCTAGACCAAATAACTATGCTGGCGCTCTT  
TATGATCCCAGAGATGAAACCTTAGATGATTGGTTCGACAATGACTTGTCCCTGTTCCCATC  
TGGTTTCGGTTTTCCCTAGAAGTGTGCGAGTTCAGTTGATATTTTGGACCATGACAACA  
ACTACGAGTTGAAAGTCGTGGTTCTGGTGTCAAAGCAAGAAGGACATTGATATTGAGTACCAT  
CAAAACAAGAACCAAATTTTGGTTTCTGGTCAAATTCATCTACCTTGAATGAAGAGAGTAA  
AGACAAGGTCAAGTCAAGGAGAGCAGCTCTGGTAAGTTCAGAGAGTCATCACTTTGCCAG  
ACTACCCAGGTGTGGATGCAGACAACATTAAGCAGACTACGCAAATGGTGTTTTGCATTA  
ACAGTTCCAAAATTGAAGCCTCAGAAGGATGGTAAGAACCACGTCAAGAAGATTGAGGTTTC  
TTCTCAAGAATCGTGGGGTAACTAA

>YLR056W 2.94 Hot

ATGGATTTGGTCTTAGAAGTCGCTGACCATTATGTCTTAGACGACTTGTACGCTAAAGTTCT  
GCCCGCTTCGTTGGCAGCTAATATTCCTGTCAAGTGGCAGAAATTGCTAGGGTTGAACAGTG  
GGTTCAGCAATTCTACGATTTTGCAGGAGACTTTGAACTCCAAGAATGCCGTCAAAGAATGT  
AGAAGGTTCTACGGGCAGGTGCCATTCTGTCTTGTATATGTCGACGACGCTTTTTGCATCGCT  
ATTGCCCTCGTTCCAGCATCTTGAGAGAATTCCTCTCACTATGGGTTATTGTTACGATCTTTG  
GTTTACTACTTTACTTATTACAGGCTAGTCTCAGCTACGTGTTTGTGTTTGACAAGTCGATT  
TTCAACCATCCTCGTTACTTGA AAAACCAAATGGCAATGGAAATCAAGTTGGCAGTCAGTGC  
TATCCCATGGATGTGATGTTGACCGTTCCATGGTTTGTATGGAATTGAACGGCCATTCTA  
AACTATACATGAAGATTGATTATGAAAACACCGGTGTAAGGAAGCTCATTATCGAGTACTTC  
ACTTTCATCTTTTTACTGATTGCGGTGTGTATTTAGCGCACAGATGGTTGCATTGGCCAAG  
GGTCTACCGTGCTCTGCACAAGCCTCATCACAAGTGGCTGGTCTGCACACCTTTTCGCATCTC  
ATTCTTTCCATCCTGTAGACGGGTTTTTGAATCCATCTCGTACCACATCTACCCATTGATT  
CTGCCATTACACAAGGTTTTCTTATTTGATTCTGTTCACTTTTGTAACTTTTGGACTGTTAT  
GATTCATGACGGTCAATACCTATCAAACAATCCTGCCGTCAACGGTACTGCCTGCCACACGG  
TTCACCATCTATATTTCAACTACAACACTACGGTCAATTCACCACTCTGTGGGACAGACTAGGG  
GGTCTTACCGTAGACCAGATGACTCATTGTTGATCCTAAGTTAAGAGATGCTAAGGAGAC  
CTGGGACGCTCAAGTTAAGGAAGTTGAACATTTTCATCAAGGAGGTCAAGGTGATGATAATG  
ATAGAATCTATGAAAACGACCCAAATACCAAGAAGAACAACCTGA

>YEL017C-A 1.54 Hot

ATGTTGATGAGCACGTTACCAGGTGGTGTATCTTAGTTTTTATTCTAGTCGGTTTGGCTTG  
TATCGCCATCATTTCTACCATTATCTACAGAAAATGGCAAGCTAGACAAAGAGTTTTACAAA  
GATTCTAA

>YJL053W 1.69 Hot

ATGAGTATTTTTTCAAGCCGCGATTGATATTGAGATCCTTTTCGATAATGAGGAATCTCG  
CAAACACGTAGACATTGCAACAAGATCAAGTAATTCAGTTACAAATCAATGAAGGAAAGCT  
TGCCCGTCTATGAAGATGGCGAATCCCTTGGTGGAAATTGTTACTTTGAGAGTTCGGGATAGT  
AAAAAGGTAGACCACTTGGGCATAAAAAGTGTCCGTTATTGGATCCATTGATATGTTAAAATC  
TCATGGGAGCGGTAATTCATCTTCTAAAAAAGTTACCTCTAGCACATCATCTTCTCTCTA  
ATGGTTCAGTAGATGTGCGGAAGAATTCAGTTGATCAATTTTTTATGCCAAAGCTATGACCTC



TGTCCTGCTGGTGAATTACAACATTCTCAAAGTTTCCCATTCCTATTCAGAGATTTGAGTAA  
 AAGATACGAATCTTATAAAGGCCAAAATGTGGATGTAGCTTACTATGTTAAGGTAACAGTTA  
 TGAGGAAGTCCACAGACATCTCGAAAATAAAAAGATTTTGGGTCTATCTTTATAATAGTGTA  
 ACTACTGCGCCAAATACCCTTTCGCGAAATGAGACAAAGGCAACCCTAATGACATCGCTGG  
 TGGTAACTATGCTGCAGATAATGCGAGTGACAACACGCAAACAAAGAGCACCCAGGGTGAGG  
 CGGCAGACGTTAATCAAGTTTTGCCGATATCACATTCAAATAATGAGCCCAAGCCTGTTAGA  
 TTGGATATAGGTATAGAAAATTGCCTTACATTTGAGTTTGAATATGCCAAATCCCAGTACAG  
 CTTAAAAGAAGTCATTGTGGGGCGTATATATTTCCCTTTTAAACGAGACTAAGGATAAAAACATA  
 TGGAAATTAAGCTTGATCACAAGAGAATCTTCCGGCCTACAACTTCTAATGTAATGACAGAT  
 TCCACTGCTATCCGATACGAAAATAATGGATGGGTCTTCAGTGAAAGGTGAAACCATACCCAT  
 AAGATTATTCTTGAGCGGCTATGACCTGACGCCAATATGAGCTGCAACTACTTTAACGTCA  
 AGAATTATTTGAGCTTGGTTATTATCGATGAAGATGGCAGAAGATATTTTAAACAATCAGAA  
 ATAACATTGTACAGGACCCGGTAG

>YOR331C 2.19 Hot

ATGTCGTCCTTCATCGACTCGATTAAATCGACGTCTCTTTCAAGAGCCTTGACAATCGCCTT  
 AGGTTCCAACAACCTTCAAAGTGCCTCCACGATCAATGATTGCAAAATGGGCTTGACTCGT  
 CCCGGTTGTTGGCAATTCCTGACAACCTTTCCCTGGTTTTCTCGAATATCCCGTCTAGCGAC  
 TGTTACGAGCAGAAAAGAACCCTCAACCTCATTTTGTGTTGCTATCGTTGACTTAGTAATCTG  
 TTGCGAAAGCATGGCCTTCTTCAACTTGCTCTTGAAGTTGCCGTCAATGTTGTTGGTTTTCAT  
 TTCTTACGATGTTGGTCTTCTCGATTTCTGACTCTTGGTCAGCCTTCAATGGATTTCCCTC  
 GCTTTTTCTTACGCTTCCCTTCTGATGAAAAGCTTGATCTTGTTCATTCATCGTTCACTTG  
 GTTTGGTGTCAAAGCAGTAATAGCGGAGGACATGCTGTATCGGATGGTGCCTGGCCTGTTCT  
 GTGCCTCTTTTGTAAAACAGTTACAAACAACCTTTTCTTGCAACTGCTATTGTTCTTTGCTGA

>YPL222W 1.91 Hot

ATGGGGGAAAAAAGGACAATAATCAAAGCGCTGAAAAACTCTGCAGCGTCCCACTTCATCAA  
 GAAGTTGACCGCAGATACTTCCCTGTCTCCATACAAGAGGCAATAAACGTCGTGCAGCAGT  
 ACAATGCAACGGATCCCGTGAGATTAAAGCTTTTCCATACGCCTCGGATGGTTTTGCAGGGG  
 GCTCATTTTTGCATTTTTGTTTGGCCACTAAGAAACCACATTACAAGCCATTACTGCTTTCGCA  
 AAACGCACTTGATGAGTTTAATTTGGTGCAGGATCAGGACTTGGAGAAAATACTATCCGGTG  
 AGAAAGTATATTATCCGATAGTATCTTTCCCTATAGTACAGTGTACTCCGGATTTCAATTC  
 GGCTCATTTGCTGCACAGCTGGGAGACGGACGTGTGGTAACTTGTGTTGATCTTAAGGACAA  
 GTGTAGCGGACAATGGCAAACGTTTTCAGTTGAAAGGTGCCGGTATGACGCCATTTTCTCGGT  
 TTGCAGATGGGAAAGCTGTGTTAAGATCAAGCATACTGAATTCATAATGAGCGAGGCGTTG  
 CACAGTATTGGAATTCATCCACAAGAGCTATGCAATTAACCTCTGTTACCGGGGACGAAGGC  
 GCAAAGGCACAATCAAGAACCGTGCCTGTTGTATGCCGTTTTGCGCCAGCTGGATCCGCT  
 TGGGTAACCTCAACCTATTCAGATGGCGGCACGACTTGAAGGGTTGATCCAACCTATCAGAT  
 TATTGCATTGAGGAATTGTTTGTGGGGGACCCAATTTGAGGGGAAACCCGACTTTAATAT  
 ATTCAAAGGGATTTTTTTTCTGACACTGAGACGAAGATTGATGAGCAGTGGAAAAGGATG  
 AAACGAGGTGAGTACCATGACCGGAGATAACATTTCCACATTGAGCAAATATGATGAGTTT  
 TTCAGACATGTAGTTAGCTTGAATGCAAACACAGTGGCCCATTTGGCAAGCGTATGGGTTTGC  
 TAACGGTGTGTTTGAATACGGATAACACCTCCATTATGGCCCTGACAATTGATTATGGCCCT  
 TTGCCTTCTTGACAAGTTTGAACCAAGCTTTACCCCGAACCATGATGACACAGCGAAGAGA  
 TATTCGTTTTGCCAACCAAGCATTATATGGTGGAACTTGCAACAGTTTGCCAAGGATCT  
 CGCATGTCTGCTGGGTCTGAGGCCCGTGACCTTGAATTGTTACTTAAAGGGCGAAGTGAATT  
 CTGTTGATGACGCCCTAGAGAAAACCATGATTGAAAGGGTCCAGAAGTTGGTAGAGCTCAGT  
 GCTAATGAGTACAAGTATGTGTTTACGACAAGGTACGCGCAGATAATGTCTCAAAGACTCGG  
 TGTAGATCTGGATCTGGAAAAGTGCATGTCTTCTACAAACCTCAAAGATATCGAACATGCAG  
 CCGAGAAGGCTAAAGAGTTCTGCGATGTTATCGTCAACCATTTGCTAGATATCTGCAGGCC  
 ACAAAGTCTGACTATAACAATTTTTTTATCCATCTACAAAATTACAAGGGGCCCTTCTTCAT  
 CAAAGATAAAAAGTGACACCGCAACACTTTTTGGAGCATTCGATGAAGAGTACTTGGGTATGT  
 TCTTCAACTCCAAGCAACTGCAGCAAATGGCAGAACTGAAGAGGCCTTCGCGGCTGGTGGAG  
 AAGGTCTTTGACGCTAACGGCGAATTGCGTGTGCTCAACGAAAAATTGCAAGAAATACGCAA  
 TTGGACCCAAGACTATTTGACCTTGGTCCCACCCACGGAACTGCTGCAAGAGCGTGCCTTG  
 CCAAGAAAGCCAACCCGTTGTTGTCCCCAGAAGTTGGGTACTGGAGGAAGTAGTCGACGAT  
 TTAATGTACAGTCAAAGGGATGGCCTACAAGATCCCAGTTCGGAGCTAGATACATCTGCGTT

GAAGAAGCTATACCTAATGAGCGTAAACCCATACGACCGCACGAAATGGGATGTCACTCTGC  
GGCCAGAACTGGAGACAAAATGGGCTGACCTTCCACCAAGATGACGCTAAGTTTATGATG  
CAAGCTTCCTGCAGTAGCTAA

>YOR344C 1.72 Hot

ATGAAGTCTATTTTAGACAGAAATGTTAGATCTAGCGAAACTACTTTAATTAACCTGAATC  
TGAATTTGATAATTGGTTGTCGGATGAAAATGACGGAGCTAGTCATATCAACGTCAACAAGG  
ACTCCTCGTCAGTCTTTCTGCATCTTCTCCACATGGTTCGAACCATTGGAAAACATTATC  
TCCCTGTCATCCAGCTCCTCGATAGGCTCTCCAATCGAAGACCAGTTTATATCTTCCAACAA  
CGAGGAATCTGCTCTTTTTCCAACAGATCAGTTTTTTCAGTAATCCTTCCCTCATACTCGCATT  
CTCCCGAGGTTAGCAGCTCGATAAAAAGAGAAGAGGATGACAATGCCCTTTCGTTGGCAGAT  
TTTGAACCGGCTTCTTTGCAATTAATGCCTAACATGATAAATACTGATAATAATGACGATAG  
TACCCCACTTAAGAATGAAATCGAGCTAAACGACTCGTTTATAAAAAACAAATCTAGATGCTA  
AGGAAACGAAAAAGAGGGCTCCAAGAAAAAGACTGACCCCTTCCAAAAGCAAGCTCACAAAC  
AAGATTGAAAAACGCTACAGAAATAACATCAACACAAAGATTGCAAGACTGCAGCAGATTAT  
CCCATGGGTAGCAAGTGAACAAAACAGCTTTCGAAGTAGGTGATTCTGTAAAAAAACAGGACG  
AAGACGGCGCAGAAACTGCCGCTACTACTCCTTCCATCTGCCGCTGCTACAAGCACGAAG  
CTAAATAAAAGCATGATCCTAGAAAAAGCTGTTGACTATATTTCTATATCTACAAAATAACGA  
ACGACTATACGAAATGGAAGTTCAAAGGTTGAAAAGTGAATCGACACTTTGAAACAAGACC  
AAAAATAA

>YLR211C 1.51 Hot

ATGAGTACTTTAGCGGAAGTTTATACTATTATTGAGGACGCCGAACAGGAATGTTCGAAAAGG  
AGATTTTACAAATGCAAAAGCGAAGTATCAAGAAGCCATTGAAGTTTTAGGTCCGCAGAACG  
AGAATTTGTCTCAAAATAAATTAAGTTCTGACGTTACGCAAGCCATTGACCTATTAACAAACAG  
GACATTACAGCCAAAATCCAAGAATTGGAACCTTTTGATTGAAAAGCAGTCATCAGAAGAAAA  
TAATATTGGAATGGTCAACAACAATATGCTTATTGGCTCTGTTATTTTTAAACAACAAATCTC  
CGATAAATGGAATAAGCAATGCTAGGAATTGGGATAACCCAGCATATCAGGACACTTTAAGT  
CCCATAAACGATCCACTTCTTATGTCAATTTTAAACCGCTTACAATTTAATTTGAATAATGA  
TATTCAAATTGAAAACAGAAGGAGGAAAAAATTCAAAAACTCGGAAATGAAGATTAACTTAA  
GACTGGAACAATTCAAAAAGGAGTTGGTATTATATGAGCAGAAAAAATTTAAAGAATATGGT  
ATGAAAATTGACGAAATTACGAAAGAAAAATAAAAAATTTGGCTAATGAAATTTGGGCGATTAAAG  
AGAACGCTGGGACAGCTTAGTAGAAAGTGCGAAGCAAAGAAGGGATAAGCAAAAAAACTAG

>YJR047C 1.52 Hot

ATGCTGACGAAGAACACACCTTTGAAAATGCTGACGCTGGTGCCTCCGCCACCTACCCAAT  
GCAATGTTCTGCCCTTGAGAAAAGAAATGGTTTTGTTGTCATCAAAGGTAGACCATGTAAGATTG  
TCGACATGTCCACTTCCAAGACCGGTAAGCACGGTCACGCCAAGGTCCATTTGGTTACCCTT  
GATATCTTCACTGGTAAGAAGTTGGAAGATTTGTCTCCATCCACTCACAACTTGGAAAGTTCC  
ATTTGTCAAGAGAAGCGAATACCAATTGTTGGATATTGATGATGGCTACTTGTCTTGTGATGA  
CCATGGACGGTGAAACCAAAGACGATGTCAAGGCACCAGAAGGTGAATTGGGTGACAGCATG  
CAAGCTGCTTTCGATGAAGGTAAGGATTTGATGGTCACTATCATTCTGCCATGGGTGAAGA  
AGCTGCCATCTCCTTCAAGGAAGCTCCAAGATCTGATTAG

>YGR147C 2.12 Hot

ATGATGGTACCCAGGATTAGTGCTTACCAGTTTTTCAAGAGGATATTTCTTCGATGGGGATT  
TGTAACTTTACCATAACAGAAAACCGTATCCATAACACTGCGCAGGGACTTTAGTGCCCCTT  
GTAGGAGTATGGTAAAATGCCCTTCTCCTACGACCTGGGATAAGTGTGCACCTCAGCACAAAGAC  
AGAAAATTTTACAGTACAGAGGAAAAAAGTAGTCAGTTTGTGATGAAAATAAAAGCAAAAAGTAA  
CAATGGGAAGAAAAATGAGCCACACGGTATTAAGGATTAATGGCTAAGTATGGTTATTCTG  
CACTGATCGTATATATCCTCTTAACCTTGTGTTGATTTGCCATTATGTTTTCTGGGAGTCCAC  
TCACTAGGTGAAGAGAAGATTAAGATCTATCTGAACAGAGGTAAGCAATTGATTGGGATGGG  
TGAGCCTGACGAAAGCAAAGTCATTCAAGATGTTAGAAGGAAACAGGCTCATCGCGAAGCAG  
TGCAAGCAGAGAATGCTGACAAGGTGGAGGACGCATCGAGGAAAACCTTCAATGAGAGATGG  
CAAGAGATGAAGGACAGCACGTTGTTGGCCGAATTGCTAATTGCGTATGGCATAACACAAGAG  
TTTGATCATCGTTAGAGTACCCCTGACGGCAGTGCTAACGCCATCCTTCGTCAAGCTTCTGC  
AGAGGTTTTGGCATCGACTTGATGAAGAAGCAGAAAAAGGTATTCCAACAGATGGCCTCTGGT

GCCAAAATAAGATACAAAGGGAACAACCCCTAGCGATTTTCATCAAGAATGAGGGCACAGCGCT  
CGACATTACAAAGCGCAAACCAAGAACCAAAGGCCAGAAATGGTTTGTATGGCCTAATGTGA

>YGL236C 1.68 Hot

ATGCTGCGTGTAACAACCTTGGCGTCTTCGTGTACTTCATTTCCCTTACAGGTCTCAGGAG  
GCGGTTGACCATATCTTCTTTGACAAGCTTCCAACCCACAACCAAGACACAGGTTCGTGGTCA  
TCGGTGCTGGACATGCAGGCTGCGAAGCTGCAGCTGCGTCATCTAGGACTGGTGCACATACT  
ACTCTCATTACACCATCGTTAACAGATATTGGTAAGTGTTCGTGCAACCCCTCTATTGGTGG  
AGTGGGTAAGGGCATCCTTGTAAAGGAAATCGACGCTCTCGATGGGCTGATGGGCAAAGTAA  
CTGATCTCGCTGGAGTGCAATTCAAAATGCTGAACAGAAGCAAGGGTCTGCTGTGTGGGGG  
CCCAGAGCCCAGATAGACAGAGAGTTATATAAGAAATACATGCAAAGGGAACCTTCCGACAA  
GAAAGCACACCCCAACTTGTCTCTGCTGCAGAACAAAGTTGCTGACTTGATCTTGTATGACC  
CCGGATGTGGCCACAAGGTCATCAAAGGTGTGGTTCTGGATGACGGTACCCAGGTTGGGGCA  
GATCAGGTCATAATCACTACAGGTACGTTTCTCAGTGCAGAAATTCACATCGGCGACAAGCG  
TATTGCAGCAGGAAGAATTGGCGAGCAGCCAACATATGGGATCAGCAATACTCTACAAAATG  
AGGTGGGCTTTCAGTTAGGGCGTTTGAAAACAGGCACTCCGGCTAGGCTGGCCAAGGAATCC  
ATTGATTTTCAGCGCTCTGGAGGTCCAGAAGGGAGATGCGTTGCCTGTCCCTATGAGTTTTCT  
GAATGAAACCGTGTGTCAGTCGAACCCACGAAGCAACTGGATTGCTTTGGCACACATAACCACAC  
CTCAAATGCACGACTTTTTTTCGCAATAAATGTCATCAATCCATTCATATTCAGGACACGACC  
ATCAAAGGCCCCCGCTATTGTCCCTCCATCGAAGCTAAGATTCTAAGGTTTCCTGATAGATC  
TTCCCATAAAGATATGGTTGGAACCAGAAGGTTTCAACTCCGACGTCATTTATCCGAACGGGA  
TATCCAATTCTATGCCTGAGGATGTCCAGTTACAAATGATGAGGCTCATCCCGGGCATGGCA  
AACGTTGAGATCTTGCAGCCGGCATAACGGCGTGAATACGACTACGTAGACCCACGGCAATT  
AAAGCCTAGCTTGGAAACAAAAATTGGTGGATGGACTATTCTTGGCCGGACAAATAAATGGTA  
CTACAGGCTACGAGGAAGCCGCTGCACAGGGGATCATTGCAGGTATCAATGCAGGATTACTA  
TCGCGCCAAGAACGGGAGCAATTGGTCTTGAAAAGGTCCGAAGCGTACATTGGTGTGCTCAT  
TGACGATCTAATCAATAATGGCGTCATAGAACCATATAGAATGTTTACTTCCAGATCAGAAT  
TCAGAATCAGCGTAAGAGCCGATAACGCAGACTTCAGACTGACGCCATTGGTGTCAACTA  
GGGATTATATCTCCTGTCCGTTAAGTCAATATTCAAGAGACAAGCACCTATATGATGAAAC  
AATACGGGCGCTTCAAATTTCAAGCTAAGCTCTCAAAAATGGTCTAGCTTACTACAGGCTA  
ATATCGCGCCACAGGCTGAAAACAGATCTGCTTGGGAAATATTCAGATTCAAAGATATGGAT  
CTACATAAACTCTACGAGTGCATTTCCCGATTTACCCATTAATTTGCTGGACATCCCAATGCA  
TGTGTGCACCAAAATTAACATTCAAGGTAAATACGAACCTTACATTGTCAAACAGAACCAGT  
TTGTGAAGGCATTTTCAGGCAGACGAAAATATGCTGTTGCCGCAAGATTACGATTACCGTCAG  
TTACCCACGCTTTCCTACTGAATGCAAACACTCTTGAACCGCGTACAGCCATTGACCATAGG  
CCAAGCAAGACGGATTCAAGGTATCACTGCGGCAGCCCTATTTGAACTCTACCGTGTGGCAC  
GGAAGCCAAGCCAACCAGTCATGTAA

>YLR185W 1.9 Hot

ATGGGTAAGGGTACTCTTCATTCGGTAAACGTCACAACAAGTCCCACACTTTTGTGTAACAG  
ATGTGGTTCGTCGTTCTTTCCATGTTCAAAGAAGACCTGTTCCCTCCTGTGGTTATCCAGCTG  
CTAAGACCAGATCTTACAACCTGGGGTGCCAAGGCTAAGAGAAGACACACTACTGGTACTGGT  
AGAATGAGATACTTGAACACGTTTCAAGAAGATTCAAGAACGGTTTCCAACCCGGCTCTGC  
TTCTAAGGCTTCTGCTTAA

>YDL181W 1.5 Hot

ATGTTACCACGTTTCAGCATTAGCACGCTCATTGCAATTACAGCGCGGTGTGGCCGCAAGGTT  
CTACTCTGAAGGTTCTACCGGCACCCCAAGAGGGTCAGGCTCAGAGGATTCGTTTGTAAAA  
GGGAAAGGGCCACGGAAGACTTCTTCGTTAGGCAGCGTGAGAAGGAGCAACTACGCCATTTG  
AAAGAACAACCTGGAAAAACAACGAAAGAAGATTGATTCTTTGGAAAATAAAATTGACTCGAT  
GACCAATAA

>YNL098C 1.71 Hot

ATGCCTTTGAACAAGTGAACATAAGAGAGTACAAGCTAGTCGTCGTTGGTGGTGGTGGTGT  
TGGTAAATCTGCTTTGACCATACAATTGACCCAATCGCACTTTGTAGATGAATACGATCCCA  
CAATTGAGGATTCATACAGGAAGCAAGTGGTGATTGATGATGAAGTGTCTATATTGGACATT  
TTGGATACTGCAGGGCAGGAAGAATACTCTGCTATGAGGGAAACAATACATGCGCAACGGCGA

AGGATTCCCTATTGGTTTACTCTATAACGTCCAAGTCGTCTCTTGATGAGCTTATGACTTACT  
 ATCAACAGATATTGAGAGTCAAAGATACCGACTATGTTCCAATTGTGGTTGTTGGTAACAAA  
 TCTGATTTAGAAAACGAAAAACAGGTCTCTTACCAGGACGGGTTGAACATGGCAAAGCAAAT  
 GAACGCTCCTTTCTTGGAGACATCTGCTAAGCAAGCAATCAACGTGGAAGAGGCGTTTACA  
 CTCTAGCACGTTTAGTTAGAGACGAAGGCGGCAAGTACAACAAGACTTTGACGGAAAATGAC  
 AACTCCAAGCAAACCTTCTCAAGATACAAAAGGGAGCGGTGCCAACTCTGTGCCTAGAAATAG  
 CGGTGGCCACAGGAAGATGAGCAATGCTGCCAACGGTAAAAATGTGAACAGTAGCACAACCTG  
 TCGTGAATGCCAGGAATGCAAGCATAGAGAGTAAGACAGGGTTGGCAGGCAACCAGGCGACA  
 AATGGTAAGACACAACTGATCGCACCAATATAGACAATTCACGGGCCAAGCTGGTCAGGC  
 CAACGCTCAAAGCGCTAATACGGTTAATAATCGTGTAAATAATAATAGTAAGGCCGGTCAAG  
 TTTCAAATGCTAAACAGGCTAGGAAGCAGCAAGCTGCACCCGGCGGTAACACCAGTGAAGCC  
 TCCAAGAGCGGATCGGGTGGCTGTTGTATTATAAGTTAA

>YLR315W 1.59 Hot

ATGAACTCTGAACAGCTGCTGCATAACTATGTTTCGGATTTCGCTACTCACTACTCTGATAAG  
 TTTTCAAGAGTTCAAGCAGCAACTACAGTCGTACACGAGCGACGAGCAACAACCTGCAACATT  
 GGTACGAATTGCTTCAGGCCAGGGATGCGCGAGTGACCTCTGAGTTAGAAGCACGAATCAAG  
 CAGTTTTTTCATAACGTTGCGCTCTAGATTACTGCGATTTCTGGAAAGCGAGCAACTATCACA  
 CTCCCTTAGCCTCGAGACACTGATCGACGCGTGTACAAGATTAATGACCTGTTGCAACAGC  
 GTTTGCAGATTCTGGATGATGCTATTCAGGAAAAGACCTCGGAACTAGCAGAATTTGAAAAT  
 ATGGTTCGCTCACCGAGTGCAGGAGACAATGCCATTCCTGGCCTATTACAAATTATACAATC  
 TTATATTAATCTATTAGAGGAAAACCTAG

>YBR025C 1.59 Hot

ATGCCTCCAAAGAAGCAAGTCGAAGAAAAAAGGTCTTATTGGGTTCGTCCAGGTAATAACTT  
 GAAAGCCGGTATTGTCGGTTTGGCCAATGTTGGTAAGTCTACCTTTTTTCCAAGCCATCACTA  
 GATGTCCATTGGGTAACCCAGCTAACTATCCATTTCGCTACCATTGATCCAGAAGAAGCCCGT  
 GTTATTGTCCCATCTCCAAGATTTGATAAGTTGTGTGAAATCTACAAGAAGACAGCTTCGGA  
 AGTTCAGCTCATTGACCGTTTACGATATTGCTGGTTTGACTAAGGGTGCCTCTGCTGGTG  
 AAGTTTTGGGTAATGCTTTCTTGTCTCACATCAGATCAGTCGATTCTATCTACCAAGTCGTT  
 CGTTGTTTTCGATGATGCTGAAATTATCCACGTTGAGGGTGACGTTGATCCAGTTTCGTGATTT  
 AGAAATTATTAACCAAGAAGACTAAGATTGAAAGATATTGAATTCGCACAAAAGGCTTTGGAAG  
 GTGCTGAAAAGATTGCCAAAAGAGGTGGTCAATCTTTGGAAGTCAAACAAAAGAAGGAAGAA  
 ATGGATTTGATTACGAAAATCATTAAATTGCTAGAGAGTGGTCAAAGAGTTGCTAATCACTC  
 CTGGACTTCAAAGAAGTTGAAATTATCAACTCCATGTTCTTGTGACTGCTAAGCCATGTA  
 TCTATTTGATTAATTTATCTGAAAGAGATTACATCAGAAAGAAAAACAAGCATCTGCTAAGA  
 ATCAAGGAATGGGTAGACAAGTACTCTCCAGGTGACTTGATCATTCCATTGAGTGTCTCTCT  
 AGAAGAAAGACTATCTCATATGTCCCCAGAAGATGCTGAAGAAGAATTGAAGAACTGCAGA  
 CAATATCTGCCTTGCCAAAGATTATCACTACCATGAGACAAAAGTTAGATTTGATTTCTTTT  
 TTCACCTGCGGTCCAGATGAAGTTTCGTGAATGGACCATCAGAAGAGGTACTAAAGCTCCACA  
 AGCTGCTGGTGTATTATCATAACGATTTAATGAATACCTTTATTTTGGCTCAAGTTATGAAAT  
 GTGAAGATGTCTTCGAATATAAGGACGATTCTGCCATCAAGGCCGCTGGTAAGTTGATGCAA  
 AAGGGTAAAGACTATGTCGTTGAAGACGGTGATATCATTACTTCAGAGCTGGTGCTGGTAA  
 GAATTGA

>YOR374W 1.98 Hot

ATGTTTCAGTAGATCTACGCTCTGCTTAAAGACGTCTGCATCCTCCATTGGGAGACTTCAATT  
 GAGATATTTCTCACACCTTCCATGACAGTGCCTATCAAGCTGCCCAATGGGTTGGAATATG  
 AGCAACCAACGGGTTGTTTCATCAACAACAAGTTTGTTCCTTCTAAACAGAACAAAGACCTTC  
 GAAGTCATTAACCTTCCACGGAAGAAGAAATATGTCATATTTATGAAGGTAGAGAGGACGA  
 TGTGGAAGAGGCCGTGCAGGCCGCCGACCGTGCCTTCTCTAATGGGTCTTGGAACGGTATCG  
 ACCCTATTGACAGGGGTAAGGCTTTGTACAGGTTAGCCGAATTAATTGAACAGGACAAGGAT  
 GTCATTGCTTCCATCGAGACTTTGGATAACGGTAAAGCTATCTCTTCCTCGAGAGGAGATGT  
 TGATTTAGTCATCAACTATTTGAAATCTTCTGCTGGCTTTGCTGATAAAAATTGATGGTAGAA  
 TGATTTGATACTGGTAGAACCATTTTTCTTACACTAAGAGACAGCCTTTGGGTGTTTGTGGG  
 CAGATTATTCCTTGAATTTCCCACTGTTGATGTGGGCTGGAAGATTGCCCTGCTTTGGT  
 CACCGGTAACACCGTTCGTTGAAGACTGCCGAATCCACCCATTGTCCGCTTTGTATGTGT

CTAAATACATCCCACAGGCGGGTATTCCACCTGGTGTGATCAACATTGTATCCGGGTTTGGT  
 AAGATTGTGGGTGAGGCCATTACAAACCATCCAAAAATCAAAAAGGTTGCCTTCACAGGGTTC  
 CACGGCTACGGGTAGACACATTTACCAGTCCGCAGCCGCAGGCTTGAAAAAAGTGACTTTGG  
 AGCTGGGTGGTAAATCACCAAACATTGTCTTCGCGGACGCCGAGTTGAAAAAAGCCGTGCAA  
 AACATTATCCTTGGTATCTACTACAATTCTGGTGAGGTCTGTTGTGCGGGTTCAAGGGTGT  
 TGTGAAGAATCTATTTACGACAAATTCATTGAAGAGTTCAAAGCCGCTTCTGAATCCATCA  
 AGGTGGGCGACCCATTTCGATGAATCTACTTTCCAAGGTGCACAAACCTCTCAAATGCAACTA  
 AACAAAATCTTGAAATACGTTGACATTGGTAAGAATGAAGGTGCTACTTTGATTACCGGTGG  
 TGAAAGATTAGGTAGCAAGGGTTACTTCATTAAGCCAACGTCTTTGGTGACGTTAAGGAAG  
 ACATGAGAATTGTCAAAGAGGAAATCTTTGGCCCTGTTGTCACTGTAACCAAATTCAAAATCT  
 GCCGACGAAGTCATTAACATGGCGAACGATTCGAATACGGGTTGGCTGCTGGTATTCACAC  
 CTCTAATATTAATACCGCCTTAAAAGTGGCTGATAGAGTTAATGCGGGTACGGTCTGGATAA  
 ACACCTATAACGATTTCCACCACGCAGTTCTTTTCGGTGGGTTCAATGCATCTGGTTTGGGC  
 AGGGAAATGTCTGTTGATGCTTTACAAAACACTTTGCAAGTTAAAGCGGTCCGTGCCAAAT  
 GGACGAGTAA

>YLR312C 1.67 Hot

ATGTCAGAAGAAGACGATCATTGGAATTTAGTTAGATTACGTAGATTACGTAAAGGGAGAGA  
 AGGGGAAGAACAGTCATCGAAGTCAGAAATATCTTTGGATAGTTTGCATGAAAGCTCCTTTG  
 CAGGAGAGGACGACGAGGACTTCGATGCAGATGTCCTATCGAACACTAGCAGTGAAGAGTCT  
 GCACAGATGAATCGTATTTACGATTTTGAACATCTAATGAATTTAGTAATGCTGGAGTTAA  
 TATTGATCAAACCTGGAGTTCCCACTATTTTCAGAGTCATTTGATACTTTGTCCGGCTCAAATG  
 TTGGCGGAACGGTATTGCCAAGTATGGAGGGGTGAAACTGAAGGATAGTACGATAAGGAAT  
 TCTAGCACACTATCGGATCATATCATAGATAAAAAGTGAGGGTAAATCTGCTAAATTGAAGAT  
 GTGGCATGTTATCATGCTATCTTCATTGCTTTCCATGACCTTTTCATACCTCGCCCTCGAAT  
 ATTCCCTGACTGGTGTGATGTGTTGGCAGGTTTAAATCACAAACAGTCATTACGTAATAATGAA  
 AGGAAGCTGTTGTACGGCAATATCGATTTTTGTTGATAAAAAATCTTACGATTCATCAAGTGA  
 CTCTTTAAGTCAGTGGGCTCCTTCAGGAAAATACTACGTCGACTTCGACAATCATATTGCAT  
 ACCCATTAAGGATGATGACCTAATGGGCTGGAGACGATACAAAACAGACTTAGTTATTTTA  
 TGGTATACAACAAAAGCTCGAATGAAAGACGGTTGGCACAAGAGAATTAACAAAATAAACGG  
 AGGAAGAATAAAGTTACACCTATTTCTCAAGAATTCCTTTTAAATCCGCTCAAGAAAGTTTAA  
 GGGTATTGCATAAAGAACAGAAACGCCGCTGAAAAGGCTCTTTGTGCTACTTCATAATAAA  
 TACAGGCAATTTTCTCCACATATTAAGGTTATTTTCGATCATTCTTGCCAAAAGCAAAACA  
 ATGTTGGTTCGGGATCCAGATTGCAGTTGCGCAAGCTTCGTTTCAAGTCAATGAAACCATTC  
 GAGTTTTTTCAGTTTAAAGTTTCGCAAAGATACCAACTGGTGTGTAAGCAGCTGAAACGGTTC  
 GGATTGAAATTACAGCATTTCGAGGATGTATAAAGCGATGTCAGAATGCAGGAAAAAAATTA  
 TTTTAAGTGCAAACACTAG

>YBR266C 1.57 Hot

ATGTGTTCCAGGTTTTCTTCAACATCTTTGAAGTGCTTATTGTGCTCACAAAATAGACATTG  
 TTCCAGTGGAAATATCGACTCTGTTGCGTACGTTTTCTTGCATTACTCTTCCGCCATTTCTT  
 CCTCGGTCAACTGTTTCAGGCTCCTCCTTCTTAGGTTCTTCTTTTCTTCTTCTCCTCATT  
 TCTTGCAAAGAGAGCTTGCTTAGGTCGGGAGTATTTCCCTCTTGGCTCTTTTGCATGTTTT  
 AAGCATATTAGCCCTGGCAATTTCCAACAGTTTCTTTTCTTTTTCGAGCAATGCTTGCTTTT  
 CCCTTCTTTTCAACTCCTTTTGGTAACAGTTTCTCCTTTTCAGCAGACTTACTAGTACTG  
 GCAGCAGCTGCAGACACTTTGGAGTCAAATGTCTCAAATGATATTGGTGGCAATTGTGCAAC  
 ACGTCTTTTCAAATTGTAG

>YFL021W 2.13 Hot

ATGCACGTTTTTCTTCCCTTTGCTTTTCCGCCCTTCCCCTGTTCTGTTTCATCGCATGTGCATA  
 TATATATATAGATATATATATACATTGTACACGGTGCACGGTAGTGAACATAACTATGAGCA  
 CGAACAGAGTCCCGAACCTCGACCCGGACTTGAATTTAAACAAAGAAATCTGGGACCTGTAC  
 TCGAGCGCCAGAAAATATTGCCCGATTCTAACCGTATTTTGAACCTTTCTTGGCGTTTGA  
 TAACCGCACGTCTTTCCATCGAATTAACCGCATAATGCAACATTCTAACTCTATTATGGACT  
 TCTCCGCCCTCGCCCTTTGCCAGCGGCGTGAACGCCGCTGGCCCAGGCAACAACGACCTCGAT  
 GACACCGATACTGATAACCAGCAATCTTCTTTTCAGACATGAACCTCAACGGATCTTCTGT  
 TTTTGAATGTGTTTACGACGATGACGATGATGATGACGTGGAGACGCACTCCATTGTGC

ACTCAGACCTGCTCAACGACATGGACAGCGCTTCCCAGCGTGCTTACATAATGCTTCTGGT  
 TTCCTAATTTTTCTGGACACTTCCTGCTCGTCCTCCTTCGATGACCACTTTATTTTACCAA  
 TAACTTACCATTTTTAAATAATAATAGCATTAATAATAATCATAGTCATAATAGTAGTCATA  
 ATAATAACAGTCCCAGCATCGCCAATAATACAAACGCAAACACAAACACAAACACAAGTGCA  
 AGTACAAACACCAATAGTCCTTTACTGAGAAGAAACCCCTCCCCTCTATAGTGAAGCCTGG  
 CTCGCGAAGAAATTCCTCCGTGAGGAAGAAGAAACCTGCTTTGAAGAAGATCAAGTCTTCCA  
 CTTCTGTGCAATCTTCGGCTACTCCGCCTTCGAACACCTCATCCAATCCGGATATAAAAATGC  
 TCCAACCTGCACAACCTCCACCCTCCGCTGTGGAGGAAGGACCCCAAGGGTCTTCCCCTGTG  
 CAATGCTTGCGGCCCTTTCCTCAAGCTCCACGGCGTCACAAGGCCTCTGTGCTGAAGACTG  
 ACATCATTAAGAAGAGACAGAGGTCGTCTACCAAGATAAAACAACAATATAACGCCCTCCA  
 TCGTCGTCTCTCAATCCGGGAGCAGCAGGGAAAAAGAAAACTATACAGCAAGTGTGGCAGC  
 GTCCAAGAGGAAGAACTCACTGAACATTGTGCGACCTTTGAAGTCTCAGGACATACCCATTC  
 CGAAGATTGCCTCACCTTCCATCCCACAATACCTCCGCTCTAACACTCGCCACCACCTTTCG  
 AGTTCGGTACCCATCGAGGGCGAAACGTTCTCCAGCTTTCGGCCTGATATGAATATGACTAT  
 GAACATGAACCTTCAACGCCTCAACCTCCTCCTTCAACAATGAAGCCTTCTGGAAGCCTT  
 TGGACTCCGCAATAGATCATCATTTCTGGAGACACAAATCCAAACTCAAACATGAACACCCT  
 CCAAATGGCAATCTGAGCCTGGATTGGTTGAATCTGAATTTATAG

>YJL173C 1.64 Hot

ATGGCCAGCGAAACACCAAGAGTTGACCCACAGAAATCTCCAACGTCAATGCTCCTGTGTT  
 TAGGATAATAGCGCAAATCAAATCACAACCCACTGAATCTCAGTTGATTTTACAATCGCCAA  
 CCATATCATCGAAAAACGGCAGCGAGGTTGAAATGATTACGTTGAACAATATTCGTGTATCT  
 ATGAATAAAACATTTGAGATCGACTCGTGGTATGAGTTTGTGTTGCAGGAACAATGATGACGG  
 CGAGCTAGGATTTTTGATTCTAGACGCTGTACTATGCAAATTCAGGAGAACGAAGATTTAA  
 GCTTAAACGGTGTGGTTGCTTTACAGAGACTATGTAAGAAATACCCAGAAATATACTAG

>YJR025C 2.68 Hot

ATGTTTAATACTACACCAATTAATATCGACAAATGGTTGAAGGAGAACGAAGGCCTTTTGAA  
 ACCACCGGTGAATAATTATTGCTTACATAAAGGGGATTCACTGTGATGATTGTGCGGTGGGC  
 CTAATGAAAGAACCAGTTATCACATCAATCCAACCTCCGAAATGGTTCTATCAAAAAAAGGA  
 TCTATGCTTTTTAAAGGTTGTGGATGAGACAGACGCTGAACCAAAGTTCATTTGATATCATCAT  
 CAATGAAGGCGATTTCATATTTATTGCCAGGAAATGTTCCCTCACAGTCCGTTCGGTTTGTG  
 ATACTGTGGGTATTGTTGTGGAACAAGATAGGCCTGGGGGAGAAAACGATAAGATAAGGTGG  
 TACTGTTCTCATTGTGCGCAAGTGGTCCACGAGAGTGAACGCAAATGTTAGACTTAGGTAC  
 CCAAGTGAAAGAAGCCATTTTAGATTTTGAAAATGATGTCGAAAAGAGGACATGTTTCCATT  
 GCAAGACGTTAACTACGCACGCCCTCAATCTAATTAA

>YNR018W 1.75 Hot

ATGAAGATTTTAACCCAAAGACGAAATTTGAAGCTCATCGCTCACATACGCTAAAAGGTGGTAT  
 TGAAGGTGCCCTTGCCGGATTGCAATCTCTGCTATAATTTTCAAAGTCTTACCAAGAAGGT  
 ACCCAAATTTCAAGCCTTCGACTCTAACATGGTCCATAAAAACCGCCCTTTGGATCACCCCT  
 CCCACGGTCTTGACTGCTATATGTGCGGAGGAGGCCTCGAACAATTTTCGACGCTACAATGTA  
 CGGATCCGGTTCCTCCTCGGAAGACGCACTAGATGAGCACAGAAGATGGAAGAGTTTGAGTA  
 CAAAGGACAAGTTTGTGCAAGGTCTATCTAATAACAAGTATAAGATCATCACCGGTGCCTGG  
 GCCGCTTCGCTGTATGGGTGCTGGGTAATCGTGAACAAAGACCCCATCATGACCAAAGCTCA  
 GAAGATCGTGCAGGCAAGAATGTACGCTCAATTCATTACCGTCGGGCTGCTGCTGGCCTCCG  
 TTGGTTTGAGCATGTACGAGAATAAGTTACATCCTAACAAAACAAAAGGTCAACGAAATGCCG  
 CGCTGGGAAAACGCACTGAGGGTCCCGAAGAGGAAAGAGAGACTCGAGAAAGAGGGAAGAAG  
 GACCGGCTACGTTTCTAACGAAGAAGAATAAACTCCAAGATCTTCAAGTCGTA

>YIL047C 1.59 Hot

ATGAAGTTTGCTGACCATCTAACCGAGTCTGCCATCCCGGAATGGAGGGACAAATATATTGA  
 TTATAAGGTCCGCAAGAAGAAGCTTCGCCGCTACAAGGAGAAGCTGGATGCCGAAGAAGAGC  
 AATCCAGCTCCTACCGGAGCTGGATGCCCTCTGTGTGGTATACCAGACTGCATTTACAGCAG  
 AGAGAGCCCGCAAAGTTCGACGCGACGGAGACTATCGCTCCGGACCTGCGTTCAAGAAGGA  
 CTATTTCTGCTTTGCAGAGGGAGTTTCGTTGCTGACTTCATTGAAGACTGGTTGATCTCGTTCC  
 AGTTGAGTAAGTGTAAACGAGTTTTACCTTTGGTTGCTAAAGGAGTGCAGACAAGAAGTTTGAG

GTTTTACAGTCGCAACTGCACTATTACTCGCTGCAGAAGAATTATGAGCGCGACAACCTTGAA  
 CCGGTCTAGTTTGAATGTTGACATGTCCACGAGTCTATATGCGGCAGGGCTTGCTGGTTCGTT  
 CTGACTCCAGGGTCAATAGCATCGACAGCGATAGCCGGTCTGTTATGTATGGGTCAATGCC  
 TGCACCAAAGAGGCCAAGAAGCCGCGTTTTGTCGCTGCTAGCGTACTGTCAGAAAGTTCTTAA  
 GGACAATAGGCTGCTGCCATCGTGGCCCAAACGTGGATTTTCTCTGCTACAGGACTTGAGAC  
 AGGATGCGTCCCTCAAGAGGCCGCGAGACGTTTGGCTTTTGGCGCTTCTTTTCTGGGACTATG  
 ACGACAACCCAGGCTAGAACTTGTAAAGCAACGCTATAATCGAGTACTATCTGTACTTGCA  
 ATTGGTCAAATCGTTCGGGATATCAACGTCACCGGGTCCGTAAAATGGTCAAGAAATTCG  
 ACAAACGTGTCACACAAGAGAGCTGACCAGTTCATGTCGTACGCCAGGACCCACTACACC  
 CTTTTCAAGCACGCGGATGCCAACGTGCAGTTGGTGGCACAGAAGATGCAACAAATAACCAG  
 TTCGCAACCAACCCCACTTCGGAGCTCTCTTCCGCCCAAAGAGACAAAGAGCCCATCACTT  
 GGTGGAAACGCAGATCACCGAGTGGTTCACCACTGCGTTGACCAATTCGCCTAAGGACAGG  
 AAGCACAATACCCATAAGTTGAAGAAATTGACCATTAGTACTCTATCTCCGAACAAATGGT  
 TCATAGAAACAACAGATCGATTGTGCAGATGCTGGTTGTCGGGCTGGGCATAGGTGTGTCAA  
 TGACTTTGATCACTTACACTTTGTATTTGGGCATTAGCTCTGAAGAAACGTCATTTACGCAC  
 AAGATTCTGTTCCCACTGTGGGGTGGTGGTACATGGTTTTGTTGATCGCGTTTTCTCTTTCT  
 TGTTAATTGTTTTATCTGGCATAGAACC GGATTAATTATAGATTTATTATGCTGGGTGAGA  
 TTCAATCCAAGAATGGTACGCAATTTTTCAACAATGATTTTGCCACGAGTAAAATTCGCTC  
 AAGTTGATTTCTTGACATTTTCATAGTACCTTGTGCGGTCTGTTCCATGTTAAGTTTCGC  
 TTTGGAGAAGCTCACACCCTTAGGCTTTTTATATATTGGTATTGTGTCTTTCTTATTTTTAT  
 GTCCCTCTGGTCTAATTCATATTTGGGACAAAGTTGTACACACTAGAAAATGGCTGGTGGTT  
 ACTCTTATTAGACTGATGATGCTGGTTTTTTCCCTGTTGAGTTTGGTGATTTCTTTTTTGGG  
 AGATATTATTTGTTGCTTGACGTATTCTATTGCCGATATTGCCATGTTCTTCTGTGTTTACT  
 CTCATACGCCCAACAATCTATGTGGCTCTTCACATTCCAGAGCAATGGGTGTTTTATCATGT  
 TTACCAAGTTATTGGAGATTCATGCAATGTTTACGAAGATTTGCTGATTCGGGTGATTGGTT  
 CCCTCATCTTTTGAACGCGCGCAAATACACTTTGGGTATAGCGTATAATGCCACACTTTGTG  
 CTTACAGATTGTCAGACCGTCTGAACAAAGGAGAACCCCTTTTATCGTGTGCGCTACGTTG  
 AATTCGATCCTTACTTCCGCTGGGATTTAGTTATGGATTGGTCCTTTGTCTACAATACTAC  
 TTCTTACAATTGGTTGCTAAGAGACGACTTGTATTTAGCTGGTAAAAAAATTTGGGAAAACG  
 GCAGTTATTCATTCAGTAGGAAGTTAGTTTTATTACTTTGCTATGATTTGGGATATCCTCATT  
 AGATTTGAGTGGATTGTATACGCAATTGCTCCTCAAACAATTCAGCAGAGTGCTGTGACGTC  
 GTTTATATTGGCCCTTTTGGAGTTTTTAAGAAGATTCGTTTGGATCATCTTCAGAGTCGAAA  
 ATGAACATGTTGCCAATGTTACCTATTACAGGTTACCGGTGACGCTCCTCTGCCTTATCCA  
 ATTGCGCAGGTCGGTGATGATTCTATGGATAGTAGTATTGGGTTCAAAGCCTTTTCATC  
 ACTTAACGACATACCTATCACGCCCTTCACATGACAATAATCCTCACAGTTTTGCCGAACCTA  
 TGCCCGCTTACCGTGGGACTTTCAGAAGAAGTCCCTCCGTGTTTGGAGAACATTTTCGAGATCC  
 ATTCTTGGGCACATGCAACTGATTTCCAAAGACCAACTGTCAATACCGTGGATGATAGGTC  
 TCCCGAAACAGATAGTGAAAGTGAAGTGGAAAGTATTATGTGA

>YDR388W 1.64 Hot

ATGAGTTTTTAAAGGGTTTACCAAGGCTGTTAGTAGGGCTCCTCAGTCCCTCCGTCAAAGTT  
 CAAGATGGGTGAGCAGACAGAGGATCCTGTTTACGAGGATGCAGAACGTCGTTTTCAAGAAT  
 TGGAGCAGGAGACAAAAAATTAAGTGAGGAATCGAAGAGATACTCGACTGCGGTGAATGGA  
 ATGCTGACACACCAAATTGGATTTGCCAAATCCATGGAGGAAATTTTCAAACCTATCAGTGG  
 TAAAATGAGTGACCCTAACGCTACCATAACAGAGGACAACCCACAAGGTATTGAAGCAAGTG  
 AACAGTATAGGGCAATTGTGCGAGAATTACAGGAAACATTGAAACCGGATCTGGCTTTGGTG  
 GAAGAAAAAATTTGTTACGCCATGCCAGGAACTGTTGAAGATTATTACTTATATTTCGTAAAAT  
 GGCCACCAAGAGAAATCACAAAAAATTAGATTTAGATAGACATCTAAACACTTATAACAAGC  
 ATGAAAAGAAGAAGGAACCAACCGCCAAAGACGAAGAAAGATTGTATAAAGCACAAGCTCAA  
 GTGGAAGTGGCTCAACAAGAATATGATTACTATAACGACTTGCTAAAGACTCAATTACCAAT  
 ACTGTTTCAGTTTGGAAAGCTGAATTTGTGAAACCATTATTTGTCTCATTTTATTTTATGCAAT  
 TGAACATTTTTTACACTTTGTATAATAGACTTCAAGACATGAAGATTCCATATTTTGGATTTG  
 AACAGTGACATTTGTAGAGTCGTACATTGCCAAGAAAGGCAATGTGGAAGAACAACCGGACGC  
 CTTGACTATTACACACTTTAACTCGGTTACTCTAAGGCAAAATTTGGAGATGACCAGAAGGA  
 AGTATGGTGTAGCAACCGCCGAAGGCTCACCCGTCAGTGGCGCATCAAGCGGTGTCCGATAT  
 GGTGCTGGGTATGATCCAGCAACTGCCACTTCTCCAACCCCTACAGGATACGGTTATGGTGC  
 CGCAGACCAAGTTACGCCGCTCAACCTGCTGCCAGTATGGTACTGCTGCCCGCGTTGGTA

CTGCTGCTGCTGTTGGTACTGCTGCTGGTGCTGCTGCTGGCGCTGTTCCGGGTACTTATCCA  
 CAGTATGCTGCTGCGCAATCTCCACCGCTCACTGGGCTAGGCTTCCAACAATCACCACAGCA  
 GCAACAGGGACCACCACCGCCTACTCTAATCCTCTAACATCACCTGTTGCGGGCACACCAG  
 CCGCGGCCGTAGCGGCAGCTCCTGGCGTTGAACTGTTACCGCATTGTATGACTACCAAGCT  
 CAAGCTGCTGGTGATTTGTCTTTCCCTGCCGGCGCAGTTATAGAAATTGTCCAGCGTACTCC  
 GGACGTGAACGAATGGTGGACAGGAAGATAACAATGGCCAGCAAGGTGTGTTTCCCTGGGAAC  
 ACGTGCAACTCAACAAGAACTAG

>YFL031W 1.84 Hot

ATGGAAATGACTGATTTTGAACACTAGTAATTCGCAATCGAACTTGGCTATCCCTACCAA  
 CTTCAAGTCGACTCTGCCTCCAAGGAAAAGAGCCAAGACAAAAGAGGAAAAGGAACAGCGAA  
 GGATCGAGCGTATTTTGAGAAAACAGAAGAGCTGCTCACCAGAGCAGAGAGAAAAAAGACTA  
 CATCTGCAGTATCTCGAGAGAAAATGTTCTCTTTTGGAAAAATTTACTGAACAGCGTCAACCT  
 TGAAAACTGGCTGACCACGAAGACGCGTTGACTTGCAGCCACGACGCTTTTGTGGCTTCTC  
 TTGACGAGTACAGGGATTTCCAGAGCACGAGGGGCGCTTCACTGGACACCAGGGCCAGTTCCG  
 CACTCGTCTGATACGTTTACACCTTACCTCTGAACTGTACAATGGAGCCTGCGACTTT  
 GTCGCCCCAAGAGTATGCGCGATTCCGCGTCGGACCAAGAGACTTCATGGGAGCTGCAGATGT  
 TTAAGACGGAAAATGTACCAGAGTCGACGACGCTACCTGCCGTAGACAACAACAATTTGTTT  
 GATGCGGTGGCCTCGCCGTTGGCAGACCCACTCTGCGACGATATAGCGGGAAACAGTCTACC  
 CTTTGACAATTCATTTGATCTTGACAATTGGCGTAATCCAGAAGCGCAGTCAGTTTGAATT  
 CATTTGAATTGAATGATTTCTTTCATCACTTCATGA

>YDR411C 1.56 Hot

ATGGCAGGCCCAAGGAATGTGCGTACATTACATGGAAATGGAGGCCGTAATAATGATGTGAT  
 GGGCCCAAAAGAAATTTCTGGTTAAATATCCCCCAATAACAAGAATTTATTTACTCTAGCGA  
 TCGTTATGACGATCGTCGGCCGTTGAATCTAATCAATCCGTGGTACTTTATTTATGTTTGG  
 AATTTGACGTTCAAGAAGGTTTCAAGATATGGAGACTTCTTACTTCTTGTGTAATGCTTTCGTC  
 TCGTGCCATGCCGCTAATGGAATATATAGTATTTATGACAGGTCCTCACAGTTGGAGC  
 GAGGGCATTTTGGTCCCCTTGTCCAATAGACGAGGACCGATGGTAACAGTAGACTATGCC  
 TACTACCTGTGCTTTTTGTATACTAGCCATCACTACGGCCACTACAATCATTTATGGGTCCTA  
 CTACCCTGTTGTGCTCACCTCTGGGTTTATATCATGCATTACATATACTTGGTCGATCGACA  
 ATGCCAACGTGCAGATCATGTTTTATGGTTTGATTCCTGTTTGGGGGAAGTACTTCCCCTTA  
 ATTCAATTGTTTTATCTCTTTCTGTTTTTAAATGAGGGTGATTTGTAATCTCATTGATCGGTTT  
 TACTACAGGGTACCTTTATACATGCTTAGATACCATACTGGGGCCAATATGGGGGATGA  
 TATCCAGAAAAGCTGATCCAACCTACGGAATCTCGCCAATGGGAAATTTCAACGCCATGG  
 TGGTTTACTAGTCTATATGCTCGCATAACGGGTGCCCAATGAACTGCAACATTCAACAA  
 CAACTTTGCCAATGTGCCATCTTCGCAAAGAGAAACGAGAACTTTTAGTGGAAGAGGTCAAC  
 GATTGGGTACGGCCCCGTCGAACATTGTCTCAAACCAGTGGCACAGATTCAGGCAGAGCTTCT  
 GGAAGTCAATTAAGAAGTGGCCCATCGAATTTGAACCAATTTCAAGGCCGGCCAACGAGT  
 AGGACAAACAAACAGCCCCTCCGACTCACAATAA

>YLL065W 1.5 Hot

ATGCTACAGTATATACCACCTCTCAAACCTACCCTACTCTCACATTCCACTCCATCACCATC  
 TCTCACCATCAGTACCAAATGCATCGCATCATTATGCACGGCACTTGCCTCAGCGGTTTAT  
 ACCCTGTGCCATTTACCCATAAAGTCCATCATTATCCACATTTTAATATCTATATCTCATTC  
 GCGACCCCAAAATATTGTATAACTGCCCTTAATACATACGTTATAACCCTTTTGCACCATAT  
 ACTAACCCTCAATTTATACACACTTATTTCAATATACCCACAAAATCACCACCAAAATCAC  
 CTAACATAAAAATTTATTTATCTTTCAACTTTACGAAATAA

>YER046W 1.83 Hot

ATGGGCAAAAACCAATTTCTTGAAGGATTTCTCTGCTTTACCGGAGGACGTACTCATAGAAAA  
 CGAGAGAGGCATAACTTTACTTGGTTACCCACTATTTTCTCCCAAGATTTACTGCCTCACG  
 TTGACCCACCACAATTTCAAAGACTAAACACTGAAAATGGCTCGTTAATTGCCCTGTGAAA  
 AATACTATATCGAACTTCATAGAAGTGTATCCTATCGATCTGAGTACTGAACGCACTGCAGG  
 CAGTAGCAGTTACAGATGACAAAGTGGTTCGTAAGTACTGATGGATTACAAGGAAAAGTACGATA  
 TTGACGATCAAGGATGGTGTATAGCTGGAATTTCAATAACTTAGGTGGAATCGAAAAAT  
 GGCTTGGTGAGAAGAAGGGTCTGGGTAAGACTACCTACGACCAGTCATGGATTAGATTAG



>YBR241C 2.5 Hot

ATGGCTGAAACTGAAAGACTAATGCCTAACGGTGGTTCCCGCGAAACAAAACCGTTAATTAC  
 GGGCCATTTAATCTTGGGCACGATAGTTGCTTGTGGGGTCGATCCAGTACGGATAACCACA  
 TCGCAGAGTTGAATGCGCCTCAAGAATTCTTATCGTGCTCCAGATTTGAGGCACCAGACGAA  
 AACATCTCATAACGATGACACTTGGGTTGGGCAACACGGACTCAAGCAATGCATTGCGTTAAC  
 CGATTCTCAATACGGCGCAATTACGTCTATATTCAGCATAGGCGGACTGTTTGGGTGCTACT  
 ACGCCGGTAACTGGGCCAACCGATACGGAAGAAAGTACGTGAGCATGGGCGCCTCGGCCATG  
 TGCATGGTTTTCTTCTCTGCTGCTTTTTCTTTTCCAACCTCTACTTGCAGTTGCTATTTGGCAG  
 GTTCTGGTAGGCATGTCTGCGGCACCGCCATTGTGATCACACCCTTATTTATCAACGAGA  
 TTGCCCCCGTGGAGTGGAGAGGCGCTATGGGATCTATGAATCAGGTTTCTATCAATCTAGGT  
 ATCCTGCTGACCCAAACCTTGGCACTCAAGTACGCAGACTCCTATAACTGGAGGTGGCTTCT  
 CTTTTCCGGATCCGTGATTGCGGTAGCGAATATTTTAGCTTGGCTCAAAGTGGACGAATCTC  
 CAAGGTGGCTGGTGAGCCACGGATTTCGTCTCGGAAGCTGAAACTGCTCTGTTCAAGTTGCGT  
 CCAGGAACGTACCAACAAGCGAAGCAAGAAATTCAGGATTGGCAGCGTAGCCATGGGCACAA  
 CCGCGACCCGGAGTCAAGCGAAGAGACTCATTCAGGACCCACACTATGGCAATATGTTACCG  
 ATCCCTCATAACAAGAAACCGCGCACAGTTATACTCGCCATCTTGTCTGCGCCAGCAATTTTGC  
 GGCATCAACTCTATTATCTTCTACGGTGTAAAAGTGATCGGCAAGATTCTACCGGACTACTC  
 GATTCAGGTAAATTTTGGCCATTTCCATCCTCAATGTCTGTTGTCACTCTAGCAGCATCTGCGA  
 TCATCGACCACGTCGGGCGCCGTCCATTATTGCTTGCCTCGACTACGGTGATGACCGCCATG  
 TCGCTGCTGATCAGTGTAGGTCTCACCTTGAGCGTATCCTTTTTTACTGGTCACGGCCACTTT  
 TGTCTATATTGCCGCATTGCCCATCGGTCTGGGACCCATCCCCTTCTTGATCATTGGTGAGC  
 TATCCTACCCGCAGGATGCCGCTACAGCTCAAAGTTTTTGGTACTGTGTGCAACTGGCTTGCC  
 ACCTTCATCGTCGGATACCTCTTCCCAGATAGGCCACGGCCTCATGGGCGGCTACGTATTTGC  
 GATCTTCGCCCGCCATCGCTGCCATGTTTGTCTACATATGTGTACAAGCGTGTACCCGAGACAA  
 AGGGCAAGACTACATACAGCGAGGTTTGGGCTGGCTACTGA

>YDR036C 1.96 Hot

ATGCTCAGAAATACGCTAAAATGTGCCCAATTGTCTGCTCTAAATACGGATTTAAAACCTACCAC  
 ACGTACATTCATGACTACTCAACCCCAGCTAAATGTCACCGACGCACCACCTGTGCTATTTA  
 CCGTTCAAGATACAGCTAGAGTTATCACGCTAAATAGGCCCAAAAAGCTCAATGCTTTGAAC  
 GCCGAAATGTCAGAATCCATGTTCAAGACTTTGAACGAGTATGCAAAGAGCGATACTACAAA  
 CTTAGTCATTTTAAAGTCATCCAACCGACCACGTTTCGTTCTGTGCTGGTGGTGATGTAGCTA  
 CTGTGGCAATATTCAATTTTAAACAAAGAATTTGCCAAGTCCATCAAATTTTTTACTGATGAA  
 TATCTTTTGAATTTTCAAATAGCAACTTACTTGAACCAATTGTTACCTTCATGGACGGTAT  
 CACCATGGGTGGCGGCGTTGGTCTATCCATTCACACGCCCTTTAGAATTGCTACAGAAAACA  
 CCAAATGGGCCATGCCCGAGATGGACATTGGTTTTTTTTTCCAGATGTAGGCTCAACTTTTGCT  
 CTCCCTAGAATCGTGACATTGGCTAACTCAAACCTCACAAATGGCCCTGTATCTATGTCTTAC  
 AGGAGAAGTAGTCACAGGAGCAGACGCTTATATGCTCGGCTTAGCGTCTCATTACGTCAGTA  
 GTGAAAATTTAGATGCTTTGCAGAAAAGATTAGGTGAAATTAGCCCCCTTTTAAATAACGAT  
 CCACAATCTGCATACTTCTTCGGGATGGTTAACGAATCCATCGACGAATTCGTATCACCAT  
 ACCAAAAGATTATGTTTTCAAGTATTCTAACGAGAAATTAACGTTATTGAAGCCTGTTTTA  
 ACTTGTCTAAAAATGGTACTATTGAAGACATAATGAATAACTTACGTCAATATGAAGGTTCT  
 GCGGAAGGTAAGGCTTTTCGCACAAGAAATCAAACGAAATGTTTAACCAAGTCACCATCCTC  
 TCTCAAATCGCCTTGAGATTGGTGCAAGAGAATTCAGAGATCACATAGAATCTGCTATCA  
 AAAGAGACTTATACACAGCAGCTAACATGTGCATGAACCAGGACTCTTTGGTGGAAATCTCT  
 GAAGCCACAAAGCATAAACTTATTGATAAACAAGGGTCCCCTATCCATGGACAAAGAAGGA  
 ACAGTTATTTGTATCTCAGTTGACATCTATCACATCTCCTAAACCATCGCTACCAATGTCAT  
 TACTAAGAAATACCTCGAATGTTACTTGGACTCAATATCCCTACCATTCTAAATACCAATTG  
 CCTACAGAACAGGAAATCGCTGCGTATATTGAAAAGAGAACGAATGATGACACTGGCGCCAA  
 AGTTACCGAAAGAGAAGTACTAAATCACTTTGCCAATGTGATTCTTCTAGAAGAGGGAAAC  
 TGGGTATCCAATCGCTATGTAATAATGTTTGTGAAAGAAAATGTGAAGAAGTTAACGATGGC  
 TTAAGATGGAAATAA

>YHR096C 1.96 Hot

ATGTCGGAACCTGAAAACGCTCATCAAGGCCCTTGGAAAGGTCTGCTACTGTGAGCACAAA  
 TTCTAACTCATAACGAGAAGTCAGGAAACTCGACTGCTCCTGGTACCGCCGGTTACAACG

ATAATTTGGCACAAGCTAAACCCGCTCAAGTTACATTTCCCATGAAGGCCCTCCCAAAGAC  
 GAACTGGAAGAGCTTCAGAAGGAGGTTGACAAACAACTAGAGAAGAAATCGAAGTCGGATTT  
 ACTATTTGTATCCGTCTGCTGTTTGATGGTTGCTTTTTGGTGGGTTTCGTGTTTGGGTGGGATA  
 CTGGTACTATATCTGGTTTTGTCAGGCAAACAGACTTCATTAGGCGATTTGGCAGCACCCGT  
 GCAAACGGGACTACCTATCTTTCCGATGTCAGAACCGGTTTGATGGTTTCTATTTTCAACAT  
 CGGCTGCGCTATCGGAGGTATAGTTTTGTCAAAGCTCGGTGATATGTATGGACGTAAGATTG  
 GTCTGATGACTGTTGTCGTCAATTTACTCAATTTGGGATCATCATCCAAATCGCCTCCATTGAC  
 AAATGGTATCAATATTTCAATTGGAAGAATCATCTCAGGACTGGGCGTTGGTGGTATTACAGT  
 TTTGGCGCCTATGCTAATTTCTGAAGTGTGCGCTAAGCAGTTGCGTGGTACTCTGGTTTCAT  
 GTTACCAATTAATGATCACTTTTCGGTATCTTTTTGGGATATTGTAATAATTTTGGTACCAAG  
 AATTACTCAAACCTGTCCAATGGAGGGTACCATTAGGCTTATGCTTTGCATGGTCTATTTT  
 TATGATTGTTGGTATGACGTTTCGTTCCCTGAATCCCCACGTTATCTGGTAGAAGTGGGAAAA  
 TTGAAGAGGCCAAGCGGTCCTTAGCAAGAGCTAACAAAACCACTGAAGACTCTCCTTTAGTA  
 ACTTTAGAAATGGAGAACTATCAGTCTTCTATTGAAGCTGAGAGATTGGCGGGCTCTGCTTC  
 TTGGGGGGAATTGGTTACTGGTAAGCCCCAGATGTTTCAGACGTACACTAATGGGTATGATGA  
 TTCAATCTTTACAACAGCTGACAGGTGACAATTTACTTCTTTTACTATGGTACTACAATTTTC  
 CAGGCTGTTGGTTTGGAAAGATTCATTTGAAACTGCTATTGTTTTGGGTGTTGTTAATTTTGT  
 TTCGACTTTTTTCTCGCTATATACCGTCGATCGTTTTGGTTCGTCGTAATTGTTTGTATGGG  
 GCTGTGTAGGTATGATTTGTTGCTATGTCGTCATGCCTCTGTTGGTGTACCAGATTATGG  
 CCAAACGGTCAAGATCAACCATCTTCAAAGGGTGTGGTAACTGTATGATTGTTTTTCGCATG  
 TTTCTACATTTTCTGTTTTCGCTACCCTTTGGGCCCCCGTTGCCTATGTCTTATCTCTGAGT  
 CGTATCCCTTAAGAGTACGTGGTAAAGCAATGTCGATTGCAAGTGCCTGTAAGTGGATTGG  
 GGGTCTTGATCAGTTTTTTCACTCCATTTATTACTTTCAGCAATCAATTTCTATTATGGCTA  
 TGTCTTTATGGGTTGTATGGTGTTCGCATACTTTTATGTGTTCTTCTTTGTTCCAGAGACAA  
 AGGGCTTAACATTAGAAGAAGTCAACGAAATGTATGAAGAAAATGTGCTACCTTGGAAAGTCT  
 ACCAAATGGATCCCACCATCTAGGAGAACAACAGATTATGACCTAGACGCTACTAGAAATGA  
 TCCGAGACCATTTTATAAAAAGGATGTTCACTAAAGAAAAATAA

>YPR063C 1.64 Hot

ATGACTTTGAATAACGTTGCAAGGCCCGACCTTTGTGTTTCGTACAAGAAAATTGCGCCACC  
 AAAAGGACTATATTTCTGCCACACCAAGCATATCTGGTGTGGTTAACCAATCCATGCCTATGG  
 CCGCTATTTTCTTGAGGAACAAGTTCAATTGCCCTGGTTCCTCCCTGATTCAGAGTGTACACTAC  
 TACCTGAACACCGACGAAGACATCATCGTTGCCATAAAGGAAAATAAGGCACCATCTCCAAT  
 GGACCAGCCTCCTGCAATCAAGCTATTTCATGAGTTAATCGGGTTATGCGTGTGTTACATGA  
 ACTTAGTTTTTCCCTCAACAAATAGCTCAACCATCGTCTAGCGGCTCTAAAGGTAATACTGAA  
 ACGACAATTGAGACAACCTACCGAAGTAGAGACGGAAACAGCTAAGCAGTAG

>YPR038W 1.62 Hot

ATGTTTTGCTTCTCGATCTCTTTCAACCGAGCGTCGTTCTTCTCAGCAGCCGCCCTTGCAC  
 TTCATCTATAACCAGACTTCGCCCTTGATTAGGCCCGGCGTAGCGATGGATAGTTCAATTAGACG  
 AGAAAAACATCCACAGGCCTATGATTCCTAATGCTGCAACTATTCTGATGGCATGGCTTCTT  
 TTGACTATCTGTTTCATCCCTTCGTTCCCTTGACACAATCTGTCCAGACTTTCCTCTTTACAAA  
 TCACCAGCCTTCCCGTCTTCTGTCTTCATCACCCACGTTTATTGTTAATGATAAAGCCTT  
 TTGTCCTTTATTTTGGTTCCCTTTTCCCGCTTCGTTTACCCGGTGGTTAA

>YGR096W 2.17 Hot

ATGTTCAAAGAGGAGGACTCGTTAAGAAAAGGGCAAATGTGGCCGCGTGGAAAACCTTGT  
 GGCTGGCGCCGTATCCGGGCTGCTTGCCCGTAGCATAACTGCTCCCATGGATACCATTAAGA  
 TCAGATTGCAATTGACCCCTGCAAATGGGCTGAAGCCCTTCGGAAGTCAGGTCATGGAGGTG  
 GCCAGAAGCATGATAAAGAACGAAGGCATCCGGTCTTTTGGAAAGGTAACATAACCCGGTTC  
 TTTGCTGTACGTTACCTATGGCTCAGCGCAGTTTAGTTTCATACTCCCTTTTAAATAGATATT  
 TAACTCCATTTGGACTAGAGGCGCGCTTACATAGTCTTGTGTGCGGAGCCTTTGCTGGCATA  
 ACCAGTTCATCGTTTCCCTACCCGTTTCGATGTTTTACGGACCCGACTAGTTGCCAACACCA  
 GATGCACTCAATGAGCATCACGAGAGAAGTGCCTGATATCTGGAAACTAGAAGGTCTCCCCG  
 GATTTTTCAAGGGCTCCATCGCGTCAATGACAACCATAACTCTAACCGCATCTATAATGTTT  
 GGAACATACGAAACAATCAGGATATACTGTGACGAAAACGAAAAACGACCCCGCGCATAA  
 AAAATGGGAACTGGTACTTTAAATCACAGCGCTGGTACCATTGGCGGCGTCATTGCTAAGA

TCATTACTTTCCCCCTCGAAACGATCCGTAGGCGAATGCAGTTCATGAATTCGAAGCATCTG  
 GAAAAGTTCTCCCGTCATTCGTCTGTATACGGTCTTATAAAGGGTACGGATTCGCAAGAAT  
 CGGTTTACAGATTTTGAACAAGAAGGTGTGAGTTCGCTTACAGAGGTATTCTGGTGGCCC  
 TTTCCAAGACAATACCCACCACCTTTTGTGAGTTTCTGGGGGTATGAAACTGCCATCCATTAT  
 TTGCGGATGTACTAA

>YJR080C 1.61 Hot

ATGATAAGCCCAAGGGTGAATACTCGAGTTTGGCAGAGATCAATTTCTCTTTTGGAGCCACA  
 AGCGGCCAAGACGGAGAGTAATGTCGTAACATAAGAAAGGACATATATCGGAACTTAAGCA  
 AGGATATTGCGACTTCCCGTTTCAGGCTAGTAGACGAAAATGGTAAAATTCATCTATCACT  
 GTTCAACCAGATATCCAAATTTGTATCAAAAAGGATTGCCTAGTTTCCATTCACAATTTGAA  
 CCATTTATCCCTTTCCTATAAAATGGCTGAATTTTGGTCAAACCTGATTAAATTTCTGTTTCA  
 TCAAATCTTCATTGTTTCATAGAATTATTGGATCCTCCGTTTGTAGAAAATCTGGCTGCCCA  
 AACTTTCAAACATCGAGAAGACCTTTCGATTCTTCAAGAAGCTTGTCCGTAAGTAAATTTGAC  
 CGGGACAAAGGATTGGAATGTATTTGGCAAGGATTCAATTATCGCATTTGAACAGAACTCCA  
 GTCTGGAATCAAATCGCCTATCTTCCCTCTGCAAGGTCTTTAGTCTCGAACTCATCAAAA  
 TCACAACACTACCACGGAAATTTCAAATTTCTGAATGGGAGAGGAAATGTGTTAGTATGTGGAGG  
 TGGGTTGGTATATTCAATTGAGTTAATTGATGAAAGCGACAAAATTTCTGGTTAATTCAGAA  
 ACATTTTGGCCATCAACGGCCAAAGTCAATTGGATATTGCAAATTCAGTGGAGAGACAAGAG  
 TTACACGTGGAAGGCGCGTACGTCGGAGATTCAAGTAATGATACGGTGGCACCTAAATTCAT  
 TAAGAACCACAAACGCTAAAATCTGCTTACGGACATACTGTTCAATTTTTCAAAGAATGCGCA  
 GTTGGATCCGTAACCAGTACGAAAAAGATACATTTATGGTGTGCGACTCGTACTTTATGAAG  
 ATTAAGGTCCAAGAACAATATTGATTCAAACGCATGAAATGACAACATCCAAAGATAATAT  
 TCTAACTAAACTAACGTCCAAGGGCCACGTTAAGAAGAGCAACGTGAATGATAACGGTGTCA  
 ATTTAGAGAAAACAAGTGGCTAACGATGTAAATTCAAAGATCATTGAGCTTGCCAACAGACCC  
 TCACTGTTTATTGCGACCGTCTCGCAAGATGGGAGGGTTGATTTTTCAAAGTACTTTCGAAGTT  
 CACATAA

>YJR049C 1.64 Hot

ATGAAGGAGAATGACATGAATAATGGCGTAGATAAATGGGTAAATGAGGAAGATGGTCAAAA  
 TGATCATCATAACAACAATAAATAACTTGGATGAAGAAGGCCATGATGAACAATGAGCAAAATG  
 ATAGAACTCAGGATATCGACAACGCCAAAGAAATGTTGAGGAAAATATCAAGTGAAGCAGC  
 TCGCGCAGAAGCTCCCTGTTGAATAAAGATTCATCTCTCGTGAACGGCAATGCAAACAGTGG  
 CGGTGGTACGAGCATTAAACGGAACAAGAGGAAGTTCTAAGAGTAGTAATACACACTTTCAGT  
 ATGCCCTCACGGCGTATGGTGTAAGAATGTTGAGTAAAGATATATCTAATACCAAAGTGGAA  
 CTGGATGTGGAAAATTTGATGATTGTTACGAAACTCAACGATGTCTCACTGTATTTCTTAAC  
 AAGAGAGTTGGTAGAATGGGTTTGGTACATTTTCCACGTGTGACTGTTTATGTGGATTCCG  
 AATTGAAAAACAGCAAAAATTTGCCGCTGGCGAGTTATGTGAAGATAGTAAATGTAGAGAA  
 TCAAGGATCAAGTATTGGACAAAGGATTTTCATCAGGGAACATGATGTTTTCTTCGATTTGGT  
 AGTGACTTTGGGTGGCGACGGTACTGTTCTTTTTGTAAGTTCATTTTTTCAGAGACATGTAC  
 CACCCGTTATGTCGTTTTTCATTAGGGTCTCTAGGATTTTTTAACAAATTTAAGTTTGAACAT  
 TTCAGGGAGGATTTACCTCGGATTATGAATCATAAAATCAAGACAAATTTACGGTTGAGGTT  
 GGAGTGCACAATTTATCGTAGACACCGCCCTGAAGTAGACCCAAACACGGGAAGAAAATAT  
 GTGTGGTGGAAAACTAAGCACACACCACATTTTGAACGAAGTGACCATCGATCGTGGTCCA  
 AGTCTTTTTCTATCCATGTTAGAATTGTATGGTGACGGCTCATTAATGACCGTTGCGCAGGC  
 GGACGGACTGATTGCTGCTACTCCGACTGGGTCCACGGCCTATTCTTTGAGTGCAGGTGGGT  
 CATTGGTATGCCCAACCGTCAATGCAATCGCTTTAACACCCATTTGTCCACATGCATTGAGT  
 TTCAGACCCATCATCTTACCAGAAAGTATAAATTTAAAAGTGAAGTCTCGATGAAGTCAAG  
 GGCTCCAGCATGGGCGGCTTTTGGTGGGAAAGATAGAATTGAATTGCAAAAAGGTGATTTTA  
 TAACCATATGCGCCAGCCCATATGCTTTTCCAACCGTGGAAAGCCTCGCCCGATGAGTTTATT  
 AACAGTATCAGTCGACAACACTGGAATGTGAGGGAACAACAAAAGTCCTTTACGCATAT  
 TTTGTCCCAAAAAGAACCAAGAAAAATATGCACATGAGGCGAACAAAGTCAGAAATCAAGCAG  
 AACCTTTAGAGGTAATAAGAGATAAATACTCTCTGGAAGCAGACGCTACTAAGGAAAAACAC  
 AACGGAAGCGATGATGAGAGCGACGATGAGAGTGTAAACTGCCAAGCTTGCAAATTAAGCC  
 TTCGAGCGTCCCAAAACCTTCTCAAGCAAGGTTTTTCAGTATAA

>YHR150W 1.74 Hot

ATGAGTGAGACCAGCTCAAGTCGCAGGAGCGCGAGTAAAGACGCTGTCAAATCTTACTTCGC  
 AGGCAAATACAATAAAGTGTGGATTCTATACTGGAGGCAGAAGCAGCAATATCAAAATCGC  
 CAACTGTAGCAGAAGATCTATCAGGAAGCTCCTCCAGCGGAAATTCTGAGATGAGCCATCCT  
 TCGCTAACCAGCTCCTCCGCAACAAGCCAAGGCATTAGCAAAAAGGAACTACTCCAACAAAT  
 TGCTGGTTCATTATTCAGTACGTCCATTGAGCGCCTGAAGACTGCCCACTCATCAGAAGTAT  
 CAAGTACTCCGGAATATTCAGTAAATGATTCGTATGGAGAGCAAGAGTGCAGGGAGTGCAT  
 GGTGTTTTCAAGTGTTCAGCGCACTTTGAGGGCGCGCCCGAATATTATGACGATGAAACCGA  
 ATCAGGGCCAGCTCTAGAACCTATGACTTCCAATAGTAAAAAGATCCTTTTATCGATGTAT  
 TTTTGGATAAACTAATATCGAGGTTGGTCCCTGAAAAGCTACCAGAAAAGAGAGCATTTTAGT  
 AGCAAAACCACCATTCAGCATGATCTAGACACAGGAAGGGTCCCGTGTTCAGCAACTAC  
 ATTGGGTAGTAATTTCAAAAAATTTGTCTAAGAAAATGGGCTCAATATTTGAACTCCAGGACT  
 CCATAGTTCGACTGCTGACTTGGAGAAAACCTACCAGGACGGTGACGTCGTTAATATTATTC  
 ACTTTGATATGTTTTAATCCAATGTACTTTGGTAATTTTGCCTATATTCCGCTTTGTCTATGG  
 TATTGTAGTTCCTGGCTATGTGCGTAAACATCCTTTACAAAAGGAGTATATATCCTCTGAAAC  
 GGAATCACGGATCATCATTGTTATATGATGTGTGCTATGAGGGAAAAAATGAGTACAGCTAC  
 GGTCAACAGTTTTTCTCCAAATCTTTTATGGACACTTTTGAATCAAGAAAATCAAGAAAATAGA  
 CGAAATATCAGAATTAGATAAAAAGAACCAGAAAACACAGGGGAATTGAAAACAAGGAATGAAAG  
 TACTAATTAATTTACGCGATATGCAAAAACATGACCTCTGGTACCCTTCATGTTATTGAGGCA  
 ATCAATAGTTTTCTTCGTAAGTCTTCTAGTTTTCAAAAACGAAGAGTGTCCACTAAACGTTT  
 TTTTACAGGATTTCTTTTGGATTGTTTTCTTAAAAATATTATCACCATTTGTGAATTGGAGCT  
 ATGTATGTAGCATATTCGCCTGGTGTACTGATATATATGCATCCAAGAGCTCATCCAAAA  
 ATAATAAGTTTTTTCAAAACAGGAACAATGGGAAAAGAATACAAAAACTTGAAAAAAGAGA  
 ACACCAGGCGCTTAACATGATATTCGATGAACAACCGGAACTAAATTCATCGAGATTTTTTG  
 AAAATATATAAAAAGGCCTTACTGCCGAACGACTGGAAGTTTTTCCGATATTCAAATAGAATT  
 TTCGATCCTCAAGATCCGTATAGAAGAGCACAGCAATTCACCCAGGGAGTAGATTCTTTGGC  
 TGATGTTATTCCCCACAGGCTGGTCATTTGATCCTAATTTTGAGTGAAAAATTGACAATG  
 ATGTGGATAGGTGGTGGTAGAACGTGGGTGAATCTGCCAATTACCGGCGAATTCCTTATTT  
 GATCCAATGTTCAAGAGGAGGAGACTGATACATCGTGTTATTAAGAATGCAACACCAGTAGC  
 ATAA

>YJL078C 1.58 Hot

ATGCTGGAGTTTCCAATATCAGTTCCTGCTAGGATGCCTAGTAGCCGTCAAGGCACAAACCAC  
 GTTCCAAACTTCGAGAGCGATGTGCTGAACGAGCATAACAAGTTCAGAGCGCTACATGTTG  
 ACACAGCGCCGCTCACCTGGTCCGACACTCTGGCCACCTATGCGCAGAACTACGCCGACCAA  
 TATGATTGTTCCGGTGTCTTAACGCATTCCGATGGCCCATATGGTGAGAACCCTTGCCCTTGG  
 TTACACAGACACGGGAGCGGTGACGCCTGGTACGGGGAGATAAGCAAGTATAATTATTCAA  
 ATCCCGGATTTTTCTGAATCCACGGGTCACTTCACACAGGTGGTTTTGGAAGTCAACCGCCGAG  
 ATTGGATGTGGTTATAAATATTGTGGTACGACATGGAACAATTATATTGTGTGCTCCTACAA  
 CCTCCTGGAAACTACCTGGGTGAGTTTGCAGAGGAAGTGAACCACTTATAAGCACTGTTT  
 CCTCGTCTCATCCTCGTCCTTCTACCTCACTACATCAGACACAGTCTCCACCATCTCA  
 TCCAGTATTATGCCCGCTGTAGCGCAAGGGTATAACAACGGTATCGTCTGCGGCTAGCAG  
 CAGTCTTTAAAATCGACGACCATAAACCCTGCCAAGACCGCTACCCTCACTGCGTCTCTT  
 CTACCCTAATTACTAGTAGCACAGAATCAGTTGGATCCTCCACTGTCTCATCAGCCTCAAGC  
 TCTCTGTCACTACTTCTATGCTACCTCCTCGAGTACCGTCTCTAGTGTGCTACTTCTC  
 ATCCACTACCACCACCTCATCGGTTGCTACATCGTCCAGTACCCTTCTTCCGACCCTACCT  
 CGAGCACTGCTGCTGCTTCTTCTGATCCTGCCTCAAGTTCGGCTGCCGCTTCTCCTCAGC  
 GCGAGTACCGAGAACGCCGCTTCTTCTAGCAGCGCCATCTCGAGCTCTTCATCAATGGTTTC  
 TGCTCCTTTGAGTAGTACTCTTACTACTTCCACCGCAAGCTCCAGAAGTGTAACCTCCAATT  
 CAGTTAATTCTGTAAAGTTTGCAAACACAACCTGTGTTTTCTGCTCAAACAACCTCTTCTGTA  
 AGCGCCTCATTATCATCATCTGTAGCTGCTGACGATATTCAGGGTAGCACTTCCAAGGAGGC  
 CACAAGCTCAGTTTCCGAACATACTAGTATAGTAACTAGTGCAACTAATGCTGCCAATATG  
 CAACGAGACTTGGGTCATCTTCCAGAAGTCTTCCGGGGCCGTCTCTTCTCAGCTGTGTCTG  
 CAATCTGTTCTGAATTCGGTTATAGCCGTCAACACCGACGTATCTGTAACCTCAGTTAGTAG  
 CACAGCCCATAACCACAAAGGACACCGCCACCCTTCAAGTAAACCGCCTCAGAAAGTATCACTT  
 CGGAAACTGCTCAGGCTTCAAGTTC AACAGAGAAGAATATTAGTAAACAGTGCCGCCACATCG  
 AGTAGCATTTACTCCAACAGTGCTTCTGTGTGTCAGGACACGGTGTAAACATACGCTGCCGAATA  
 CGCCATTACATCCGAGCAATCCTCTGCGCTTGCCACATCTGTGCCTGCTACAAATTGCTCTA

GTATCGTGAAGACCACAACCTTTAGAAAATTCGAGTACCACAACCATCACAGCCATTACTAAG  
 AGTACTACAACCTTGGCCACTACTGCTAACAACCTCCACAAGGGCAGCTACCGCAGTAACCAT  
 AGATCCCACATTGGACCCTACCGACAACCTCAGCTAGTCCAACCGACAATGCTAAACACACCT  
 CTACATATGGATCTTCTTCCACAGGCGCATCTTTAGATAGCTTACGCACAACCACCAGTATT  
 AGTGTCTCAAGCAACACCACACAGTTAGTCTCTACCTGCACCTCCGAGAGCGATTATCCGA  
 TAGTCCTAGCTTCGCCATCTCCACTGCCACCACCCTGAAAGCAATCTGATCACAACACCA  
 TCACAGCTTCTTGTAGTACGGATAGTAATTTCCCTACCTCCGCTGCTTCTTCTACAGATGAG  
 ACGGCCTTCACTAGAACAATCTCGACATCTTGTAGCACTTGAACGGCGCCTCAACCCAAAC  
 CAGTGAGCTAACCACATCGCCTATGAAAACCAACACGGTGGTTCCAGCTTCTTCTTTCCCTT  
 CAACTACAACCCTTGTCTAGAAAATGATGACACTGCCTTTTCTAGTATCTACACTGAAGTC  
 AACGCCGCAACTATCATTAACCCCGGAGAAAACATCTTCTCTCGCTAGCGATTTCGCCACATC  
 TGAAAAGCCAAACGAGCCCACTTCTGTCAAAATCCACCTCAAACGAAGGCACCTCTTCCACAA  
 CAACAACCTACCAACAGACTGTTGCTACACTGTATGCCAAGCCCTCCAGCACAAGCCTAGGT  
 GCAAGAACAACCTACTGGTAGCAACGGTTCGTTCAACTACCAGCCAACAAGACGGGTCTGCCAT  
 GCATCAGCCAACTTCCTCGATCTACACTCAACTAAAAGAAGGCACATCAACCACCGCAAAAC  
 TTTCTGCATACGAAGGTGCTGCAACACCTCTTCCATTTTCCAGTGCAATAGTCTAGCTGGA  
 ACGATTGCCGCTTTTGTCTAGCTGTTCTGTTCGCCTTCTAG

>YDR174W 1.68 Hot

ATGACTACAGATCCTTCTGTCAAATTGAAGTCGGCCAAAAGACTCCCTCGTCTCCTCCCTCTT  
 CGAGTTATCAAAAAGCTGCTAATCAGACAGCCTCCTCTATTGTTGATTTCTACAATGCCATCG  
 GCGACGATGAAGAAGAGAAGATAGAGGCTTTCACCCTTTGACTGAGTCTTTGCAAAACATTG  
 ACTTCTGGTGTAACCCTTGCACGGCATCAGCTCGGAGCTGGTTAACCTATTGATGATGA  
 TAAAGATGCTATTATCGCTGCTCCAGTCAAGGCTGTAAGAAGAAAGATCGAACGTGATCCAA  
 ATGCTCCAAAAGGCCACTGACTGTTTTCTTTGCTTACTCTGCGTACGTTGTCGAAGAACTT  
 CGTGAAGACAGACAAAAGGCTGGCTTGCACCTTTTATCCTCAACTGAGATTACTCAAGAAAT  
 CTCCAAGAAATGGAAGGAATTGAGTGATAACGAAAAAGAAAAATGGAAGCAGGCTTACAACG  
 TCGAGTTGGAGAATTACCAAAGAGAGAAATCCAAATACTTAGAAGCAAAGAAAAACGGTACC  
 CTACCACCAGCTTCCTTGGAAAACGGTCCAACCTCATGCGCCGGTTCCAATTCCTTTTCACTTT  
 ACAGCACGCCGCTGAACCTCCTGTGGAAGAGACCTCACGATGATGATGGATCTTCGGAAA  
 AGAAGAAGAAGAAGAAGAAGAAGGATAAGAAGAAGGACAAATCCAACCTTCTATTTGA

>YPL252C 2.1 Hot

ATGCTGAAAATTGTTACTCGGGCTGGACACACAGCTAGAATATCGAACATCGCAGCACATCT  
 TTTACGCACCTCTCCATCTCTGCTCACACGCACCACCACAACCACAAGATTTCTGCCCTTCT  
 CTACGTCTTCGTTCTTAAACCATGGCCATTTGAAAAAACCGAAACCAGGCAGAAGACTGAAG  
 ATAACTTTTTATTCTGAAGGATGGCTCCCAGAAGACGTACGAAGTCTGTGAGGGCGAAACCAT  
 CCTGGACATCGCTCAAGGTCACAACCTGGACATGGAGGGCGCATGCGGCGGTTCTTGTGCCT  
 GCTCCACCTGTACGTCATCGTTGATCCAGACTACTACGATGCCCTGCCGGAACCTGAAGAT  
 GATGAAAACGATATGCTCGATCTTGCTTACGGGCTAACAGAGACAAGCAGGCTTGGGTGCCA  
 GATTAAGATGTCAAAAAGATATCGATGGGATTAGAGTCGCTCTGCCCCAGATGACAAGAAACG  
 TTAATAACAACGATTTTAGTTAA

>YFR025C 2.17 Hot

ATGCACTCACACCATTACACTCCGGTGACTATAGTGCCACGGTACGGACCCTTTGGATTTC  
 CGTGGTCGATCAAGTGGTCAACCTCAACCTTTCACACGTACTGTTTGACAGAGCACATAACAA  
 GAATTGAGGCCAAGTTTATATACCCCGAAGAGCAGTCATTGGGCAAGAATCCTGAGGAAGTC  
 ATAACCAAGCTAGAAACATCGTTCAAGAATTTTCATGAGTCATGCGCAAGAAATCAAGACTCG  
 TTATGCTGATAGACCCGATGTGCGGACTAAATTCATTATAGGAATGGAGATCGAAAGTTGTG  
 ACATGGCTCATATCGAATATGCAAAGCGACTCATGAAGGAGAATAATGATATTTTGAAGTTT  
 TGTGTGGGTTCCGGTCCATCACGTCAACGGGATCCCTATTGATTTTCGACCAACAACAATGGTA  
 CAATTCATTGCATTCCTTCAATGATAATTTGAAACATTTTCTCCTGTCTTACTTCCAATCAC  
 AGTACGAAATGCTGATCAATATTAACCGTTGGTTCGTTGGTCACTTCGACCTTTACAAATTA  
 TTTTGGCCCAATGACATGCTAGTAAACCAGAAATCGGGCAACTGCAACGAAGAAACCGGAGT  
 TCCTGTAGCTTCACTGGACGTCATCAGTGAATGGCCAGAAATATACGATGCAGTTGTAAGAA  
 ATTTACAATTTATAGACTCCTATGGCGGCGCAATTGAAATCAATACGTCCGCATTAAGAAAG  
 CGCCTCGAGGAGCCGTACCCAGCAAAACCTTATGTAATCTGGTCAAGAAGCACTGTGGATC

CAGATTTGTTCTAAGTGATGACGCACACGGCGTGGCGCAAGTGGGTGTGTGCTATGACAAGG  
 TAAAGAAATACATAGTAGACGTGCTACAATTAGAGTATATTTGCTACCTTGAGGAAAGCCAA  
 TCACCAGAGAATCTGTAACTGTAAAGAGATTACCCATTTTCGCAATTCGTTAATGATCCCTT  
 TTGGGCCAATATATAA

>YFL016C 1.63 Hot

ATGGCTTTCCAACAAGGTGTATTGTCAAGGTGTTCCGGTGTCTTTAGACACCATGTGGGACA  
 TTCTCGCCATATCAATAATATTCCTTATAGACATGCCATCGCGTTTGCATCCATCGCTCCAC  
 GAATACCAAAATCTAGCTTCCATACTTCTGCAATCAGAAAACGAAGCATTCAAGGACCCG  
 TACGATACTTTAGGCTTGAAGAAATCTGCTACAGGTGCGGAAATCAAAAAGCATACTACAA  
 ACTGGCAAAGAAGTACCACCCGGATATCAACAAGGAACCGGATGCTGAGAAGAAATTCACG  
 ATTTACAGAACGCTTATGAAATTCGTGTCAGACGAAACGAAGAGGCAGCAGTACGATCAATTT  
 GGGCCCGCTGCCTTCGGCGGGCGGGTCCCGTGGAGGTGCCGGTGGTGGTAGTGGCTCTCC  
 CTTTGGTTCCCAATTTTCATGATTTCTCAGGATTCACCAGTGCAGGCGGCTCGCCATTTGGCG  
 GTATCAATTTTGAAGACCTGTTTGGTGTGCATTTGGTGGTGGTGGCCGCGGTAGCGGTGGC  
 GCAAGCAGGTCGTCATCTATGTTTCAGACAATATAGGGGCGACCCAATCGAGATTGTCCATAA  
 AGTGTCTTTCAAGGACGCAGTGTGGGTCCAAGAACGTTTCAGTTAAGATTCTCTGCGCTGG  
 ACCCTTGTAGTACCCTGTTTCAGGGACGGGAATGAAACCAAACACGCATAAGGTCAGTTGTAGC  
 ACTTGTACGGAACAGGAACCACTGTTTCACATTAGGGGCGGATTTTCAGATGATGTCGACTTG  
 TCCACTTGTCAACGGTGAAGGTACCATGAAACGGCCTCAGGACAATTGTACCAAGTGCCATG  
 GTGAGGGTGTTCAGGTCAACAGGGCAAAGACAATTACGGTGGACTTGCCACATGGATTACAG  
 GACGGCGACGTGGTTCAGGATCCCTGGCCAAGGCTCATAACCTGACATCGCTGTAGAGGCGGA  
 CTTGAAAGATTTCAGTCAAGTTATCAAGAGGTGATATTTTGGTGAAGAATTCGTGTGACAAGG  
 ATCCCAACTTTTCGATAAAGAACAAGTACGATATTTGGTACGACAAGGAGATTCCTATAACC  
 ACAGCTGCACTTGGTGGTACTGTCATATCCCCTGTTGGAGGGACAAAAGATCAGGATAAA  
 GGTGCTCCAGGGACTCAATACAATCAAGTGATATCCATTCCTAACATGGGTGTTCTTAAAA  
 CATCAACCATTTCGCGGTGATATGAAAGTCCAGTACAAGATCGTTGTTAAGAAACCGCAATCG  
 CTGGCAGAAAAATGCTTGTGGGAGGCACTGGCAGATGTCACCAACGATGACATGGCCAAGAA  
 AACCATGCAACCGGGCACAGCCGCGGGTACAGCCATTAATGAAGAGATACTGAAGAAACAAA  
 AACAGAAGAGGAAAAACACGCAAAAAGGATGACGACAACACTTTGAAGAGACTAGAAAAT  
 TTCATTACCAACACATTCAGGAAGATCAAAGGTGACAAAAAAATTA

>YHR175W 1.56 Hot

ATGGATGATAAGAAAACATGGAGTACAGTCACTTTGAGAACCCTTCAATCAGCTGGTAACGTC  
 TTCGTTAATTGGATACTCAAAAAGATGGATAGCATGAATCACAAGATGGAAGGAAATGCGG  
 GCCACGACCACAGTGATATGCATATGGGAGATGGAGATGATACCTGTTTCGATGAATATGCTA  
 TTTTCGTGGTCATACAAGAATACGTGTGTCGCTTTTGAATGGTGGCATAATCAAGACCCTGCC  
 TGGACTGATTTTAAAGTTGTTTAGCAATTTTGGTCTAGCCTACCTCTATGAGTACTTAAAGT  
 ACTGTGTCCATAAGAGACAATTATCCAGAGAGTATTGTTACCAAATAGATCTCTGACCAAG  
 ATCAACCAAGCCGACAAAGTGTCCAATAGTATTCATATGTTTGAAGTGGGATTCTCATT  
 CATGCTCATGCTTGTATTTCATGACTTATAATGGTTGGTTAATGTTAGCTGTCGTGTGGGG  
 CAATATGGGGTAATTACAGCTGGTGTACTTCGTATAGTCCCTGAGATAGATGACAGCTCCCTC  
 GCCTGCCATTAA

>YDR405W 1.52 Hot

ATGCCACGATTGACGGTTGGAACGAAGAATATGTTGTATCCTTTGCAAAAACACTTGCAGT  
 AGGAAGTTGCAAGCCAGAGCAGGTTCCAATAAGATCACTAGCCTCAGTGGTGGAGAGTTCCT  
 CAAAATACTCGACAAAAGCGGCAGCGATCGCGAAGTAGATATAAACGTAAGCGAGAAGATT  
 TATAAGTGGACAAAAGCGGGCATAGAGCAGGGAAAGGAGCATTTCAAAGTTGGAGGTAACAA  
 AGTCTACTTTCCAAGGCCAGGATCATCCTCTTGGAGCCCAACGCGAAGCACACACCGTATC  
 AAGCAAAATTCATCGTCCCAAAATCGTTCAACAAACTGGATCTCAGAGACTATCTTTATCAT  
 ATCTACGGCTTAAGAGCAATGAACATTACGACGCAGCTGCTTCATGGGAAGTTTAAACCGTAT  
 GAACCTACAGACGACGCGGTTTAGAGAACCGCAGATCAAGAAAATGACTATCGAGATGGAAG  
 AACCTTCATTTGGCCCCAAGAACCCCGTCCGGACGAAAACCTCTTCTGGGACAGCACCACG  
 CCTGACAACATGGAAGTACCGTGAAGAAAGACTTAACTGCTTGGGCTCAGACGCCAACAA  
 ACCCGGCACAGCATTCGACGGAGTCGTGGGGCCTTACGAACGGGTGGCCAGCCTTTTATAC

CTCGCTTCTTAAAACGAGAGATAGACAATAAGCGAGAGCGTCACGCCGCCGAACCTGCAGCGC  
GCAGATAAACTAATTGCCCTGAACAGGTACATAGAAGATCTACATTAG

>YPR183W 1.61 Hot

ATGAGCATCGAATACTCTGTTATCGTTCCCGCTTACCATGAAAAGCTGAACATCAAACCCTT  
AACCAACCAGATTGTTTGCCGGCATGAGCCCTGAAATGGCCAAGAAGACCGAGTTGATCTTTG  
TCGATGACAACCTCACAGGATGGCTCCGTTGAGGAGGTGGACGCCCTAGCTCACCAAGGCTAC  
AACGTCCGCATCATCGTCAGGACAAATGAACGTGGTCTATCCTCCGCCGTGCTTAAGGGTTT  
CTACGAGGCCAAGGGTCAGTACCTGGTATGCATGGACGCAGACCTACAACACCCTCCAGAGA  
CCGTGCCCAAGTTGTTTCGAGTCTTTGCACGATCACGCCTTACTCTGGGCACCAGATATGCC  
CCAGGTGTCGGCATTGACAAGGACTGGCCTATGTACAGACGCCTCATTTCCTCCACTGCTAG  
AATGATGGCCAGACCTTTGACCATCGCCTCCGACCCCATGAGCGGGTCTTCGGTCTACAAA  
AGAAGTACCTCGAAAACCTGCAACCCTAGGGACATCAACTCGCAAGGTTTCAAGATTGCCCTC  
GAGCTTCTCGCCAAGCTTCCCTTCCAAAGAGACCCTAGAGTGGCGATCGGCGAAGTGCCATT  
CACTTTCGGCGTGAGAACGGAAGGTGAATCCAACTGTCAGGTAAAGTCATTATCCAATACT  
TGCAACAACCTAAGGAGCTCTACGTCTTCAAGTTTGGCGCCAATAACCTTATCCTTTTCATT  
ACTTCTGGTCCATTCTGTTCTTCTACGTTTGCTACCAGCTATACCATTGTTGCTTTTAA

>YIL043C 1.72 Hot

ATGGCTATTGATGCTCAAAAAGCTTGTGGTGGTCATCGTGATCGTGGTTCGTGCCTTTGCTCTT  
CAAGTTCATTATCGGACCGAAGACCAAGCCTGTGCTGGATCCCAAAAAGGAATGACTTCCAAT  
CATTTCCGCTGGTTGAAAAAACCATCTTAAACGCATAATACTTCGATGTACAAGTTCGGGCTA  
CCTCATGCTGACGACGTACTCGGTTTTACCAATTGGTTCAGCATATCGTAATTAAGGCCAATAT  
CAATGGTAAGGATATTACCAGATCGTATAACGCCACATCGTTGGATGGAGATACAAAAGGAA  
ACTTTGAATTACTAGTGAAGTCTTACCCACAGGTAACGTTTCTAAGATGATTGGAGAGTTG  
AAGATAGGTGACTCGATCCAGATCAAGGGCCCTCGTGGGAACCTATCATTATGAGAGAAAACG  
CCGTTCCCATCTAGGGATGATTGCTGGTGGTACTGGTATTGCGCCCATGTATCAGATCATGA  
AAGCTATTGCCATGGACCCTCACGACACTACCAAGGTCTCTCTAGTCTTTGGGAACGTCAT  
GAGGAGGATATTCTGTTGAAGAAGGAACCTGGAAGCGTTGGTGGCCATGAAGCCTTCCCAATT  
TAAGATAGTTTACTACTTAGACTCTCCTGACCCTGAAGACTGGACTGGTGGTGTAGGATACA  
TTACCAAGGATGTCATCAAGGAACACTTGGCCGCTGCTACAATGGACAACGTTCAAATTTTG  
ATCTGTGGTCCCTCCAGCCATGGTTGCCTCAGTTAGAAGAAGTACCGTGGACTTGGGGTTCAG  
ACGTTCCAAACCGCTTTCCAAGATGGAAGACCAGGTGTTTGTGTTTTAA

>YOL020W 1.92 Hot

ATGACCGAAGACTTTATTTCTTCTGTCAAGCGTTCAAATGAGGAGCTGAAGGAGCGAAAATC  
TAACTTTGGATTGTTAGAAATACAAATCCAAGCAATTAACATCATCCTCATCACACAATTCAA  
ACTCATCGCATCACGATGATGACAACCAACACGGCAAGAGGAATATTTTCCAGCGATGTGTT  
GATCTTTTCAAGTCTCCTCTGGACGGCTCGTTCGACACAAGTAATTTGAAGAGGACTCTGAA  
ACCAAGGCACTTAATCATGATTGCCATTGGGGGCAGTATAGGTACTGGTTTGTGTTGTCGGTA  
GTGGTAAGGCAATCGCCGAAGGTGGTCCCTCTTGGTGTGTCATTGGTTGGGCTATTGCAGGC  
TCTCAAATCATCGGGACGATTCATGGGCTAGGTGAAATCACGGTGCGGTCCCCGTTGTCCG  
GGCCTTTGCCAATTACGGCACAAGGTTTTTGGATCCAAGTATAAGTTTTGTTGTTTCGACCA  
TATACGTGCTACAGTGGTTTTTTGTATTACCCTTAGAAATCATTGCGGCGGCAATGACCGTA  
CAGTACTGGAACCTCGTCTATTGACCCCGTAATTTGGGTAGCCATCTTTTATGCTGTTATTGT  
TTCCATAAATTTGTTTGGTGTACGAGTTTTTGGGGAAGCGGAATTTGCATTTTCCACCATAA  
AAGCAATAACAGTTTGGCGATTCAATTATATTGTGCGTTGTCCCTCATTTCGGTGGAGGTCCC  
GACCACGAGTTCATTGGCGCCAAATACTGGCACGACCCTGGTTGTTTGGCCAATGGGTCCC  
GGGCGTCTATCTGTTCTTGTGTTGCTTCGTATTCTCTCGGTGGTATAGAAATGACGTGCC  
TGGCATCAGGTGAAACGGACCCCAAAGGCTTACCAAGTGCTATCAAGCAAGTGTTTTGGAGG  
ATCTTATTTTTCTTTTTGATATCACTGACCCTGGTAGGATTCCTGGTTCATATACAAACCA  
AACTTACTGGGTGGTTCATCTGTGGACAACCTCACCTTTTGTTCATTGCCATAAAATTCATC  
ACATTAAGCCTTGCCCTCCATCGTCAATGCGGTTCATCCTTATCAGTGTTTTGGAGTGTAGGT  
AACTCCTGCATCTTCGCTTCAAGTAGAACGTTGTGTTTCGATGGCCCACCAAGGCCTTATTC  
ATGGTGGTTTTGGTTATATCGACCGTGTGGTAGGCCACTGGTTGGCATTATGGCAAATTCAC  
TATTTGGATTACTAGCATTCTTGGTCAAATCTGGCTCGATGTCTGAAGTTTTCAATTGGTTA  
ATGGCCATTGCCGGCCTGGCCACGTGCATTGTCTGGTTGAGCATCAACCTGTCACATATCAG

ATTTAGACTGGCGATGAAGGCTCAAGGGAAGTCTCTGGATGAATTAGAATTTGTTAGTGCTG  
 TCGGGATTTGGGGATCAGCGTATTCGGCTTTAATCAACTGTCTAATCTTGATAGCTCAATTC  
 TATTGTTCACTATGGCCATTGGTGGCTGGACCAGCGGCAAAGAAAGGGCTAAAATATTTTT  
 TCAAAATTATCTGTGTGCCTTAATCATGTTATTTATATTCATCGTCCACAAAATTTATTACA  
 AGTGTCAAACAGGCAAATGGTGGGGGTTAAGGCGTTAAAGGACATAGATTTGGAAACCGAT  
 CGTAAAGATATCGACATCGAAATAGTCAAGCAAGAAATTGCCGAAAAGAAAATGTACCTAGA  
 TTCCCGTCCATGGTACGTGAGACAGTTCCATTTCTGGTGTTAA

>YFL030W 2.56 Hot

ATGACTAAATCTGTAGATACGCTGCTGATCCCAGGCCCATTTATCCTAAGCGGAGCAGTCCA  
 GAAGGCCCTGGACGTTCCCTCTTTGGGCCACACCTCTCCTGAGTTTCGTCTCTATTTTTCAA  
 GGGTGCTAAAGAACAAGAGCTGTCTTCAAATCCGCTGCTGCCTCGAAGTCTCAGCCTTTT  
 GTGCTTGCCGGCTCTGGTACGTTGGGGTGGGACATATTTGCCTCGAACTTTATTCTTTTCGAA  
 GGCCCCAACAAGAACGTGCTGGTTCGTATCCACTGGGACATTTTCTGACAGTTTGTGCTGACT  
 GTCTGCGTAGCTACGGTGGCAAGTAGATGTTGTTAGGCCCTCAAGATAGGCGAATCAGTT  
 CCTTAGAACTGATTACTGAAAAGTTGTCGCAAAATAGCTATGGGGCTGTCACGGTTACGCA  
 CGTTGACACTTCAACGGCAGTGTGTCCGATCTGAAAGCCATTTTCGCAAGCGATTAAGCAGA  
 CTTTCGCCGAAACGTTCTTCGTAGTTCGATGCTGTATGCTCGATTGGATGCGAAGAGTTTGAA  
 TTTGATGAATGGGGGGTGGATTTTCGCCTTGACTGCTTCGCAAAAGGCTATTGGCGCTCCAGC  
 GGGTCTTTCTATCTCGCTATGCAGTAGCAGATTCATGGATTATGCACTCAACGACAGCAAAA  
 ATGGTCATGTACATGGGTATTTTTCTCCTCGTTGAGAAGATGGACACCAATAATGAAAAATTAT  
 GAGGCTGGTAAAGGAGCTTATTTTGCAACCCACCCGTACAACCTAATTAATAGCCTTGATGT  
 AGCCTTGAAAGAAATTCTCGAAGAGGGGTTGCATAAGAGATGGGATTTGCACCGTGAAATGA  
 GTGATTGGTTTAAAGACAGTTTGGTTAATGGCTTGCAATTGACATCCGTCAGTAGGTATCCT  
 TCTAACATGTCTGCGCACGGGTTGACAGCCGTATACGTAGCAGATCCTCCTGATGTCAATTGC  
 TTTTTTAAAGTCACACGGTGTAGTCAATTGCCGGAGGTATTCACAAGGACATCGGACCCAAGT  
 ATATCCGTATTGGACATATGGGTGTGACCGCTTGCAACAAGAATTTACCGTACATGAAGAAC  
 TGCTTCGACTTAATAAAACTAGCTCTTCAGAGGAAAAAGTGA

>YBR220C 1.72 Hot

ATGGAACCTAAGCGAAAGAGCGGGTCACTAGCCAAGCATGATTTGCCGCAATTTTATCTTTT  
 AATTATGTTATATTTGGCTCAAGGCATACCTGTAGGATTGGCCTTCGGTACCGTACCGTTTC  
 TACTGAAATCTTTAGCAAAGGAGACCTCGTTTACATCACTGGGAATTTTCTCTATGGCTACA  
 TATCCATATTTCTTAAAGATCATATGGTCAACCAATAGTAGACTCACTGTACAACAAGCGCAT  
 CGGTAGAAGAAGATCATGGATCATTCCAGTACAATTTGTTAGTGGATTTGTGCTATGGGCAT  
 TAGGGTGGTGCATATCACAAGGCATAATCTTCGATGGTGTGACGATGCGTTCCATAATCGC  
 GGTAATGGCACTTTACACAGTGTGAGTATAAAAAATTTGACGTGGTGGTTTGGCCTGTTAGT  
 TTTTCTGTGTGCCACTCAAGACATCGCAGTTGATGGTTGGGCGTTGACGATTTTGTCCAAAG  
 AATCCCTATCATATGCATCTACCGCGCAAACAATAGGTTTGAATATTGGTTATTTTATGTCA  
 TTTACCATTTTCTGTCGTTGAATTCCTCTGATTTTCGCCAATAAGTATTTAGAAACATCCC  
 ACTGGATCACGGGTTTATTAGTCTTGGTGGGTACATGAAATTTCTCGGGCATGCTTTACATTG  
 TAATAACCATATATATCATCTTTTGCACCAAGGAAAAACCTACGTAGAGTATTTGCCCAA  
 GTGGAGCCCATAAATACAAGTGACGGAGGGTCAAAGCCGATAAGTATTGAGTATGACGACGG  
 TGATGTGGTGTCAACTCAGAATACAAGCAGTATAAAGTACATTTACCGCTGCTTTATAAAAG  
 TGTGAAATTGAAGTCCGTAAGAAGCCTAGCCTTCATTCACATGATTTTCGAAATTTGCCTTT  
 CAATGCAACGAAGCCGCCACAAACCTGAAACTACTAGAGCAAGGCTTCAAAGAGAAGACTT  
 GGCTGTGACAGTACTCATAGACCTGCCGTTTCGAAATCATATTTGGGTACTATGTTGTTAAAT  
 GGAGTCCGACAAGGACCCCATGATTCGTGACAATAGAAGATTAAGAAACAGCACGGGCACC  
 AACAGGTCAAGTTCTTAGTTGGGGATGCCGGCGTTTAAACCCATGGTTGTGGGGCTT  
 TTTGGGCCGTCTGGCAGCCGCGTCTTGGGAAGTTACGTGGTGAAGCAATTTCCCAAGGATG  
 GTGAAATATCCACGGGTTATTTTTGTCTCGTGATATTCAGCACCTCTTAGGTTCTTTCATG  
 AATACTGTCCAGTTCATTGGAATATCGGCCCTCCATAACAAGAGTTGCAGACCCCGTGTGGG  
 TGGCACATATATGACATTGTTAAATACCCTCAGCAACTTCGGTGGGACATGGCCGCGGTTAA  
 TCATATATGTCCATGATCAACTACTTCACCGTGTATCAGTGCATTTCTTGGCACAAATAAA  
 GTATACGTAACCTCACGGCGCAGCATGCAAGCGTGCACCGAGCTTTTGAATGGCACCGTGAC  
 CATCTGCGTGACGGCTATTACATCACCAATCTCATATGTATTGTAGTCCGACTTTTCTTAT



ATTTTGGATATTTGAAAAGGAAAATCCTCCATTTACAAAGTCTGCCAATCAGTTCCTGGAGA  
TGTACGTAA

>YLR213C 1.84 Hot

ATGAGAATATCAATATTACAGCTGGTGCCGGTTGTTGGCTACATCGGATTTGCACTGGGAGA  
ATTATACAAACCCAAAACTCCATTTCTTGTCTCCAAATAACCCTTGTCCCGCAGAATGGC  
CGTGCTGCTCGCCGTATAATGAATGTGGCGCTGGACCGATATGTGTGGTGGCTGCAACGTG  
AGGTCATCTTTTCGACGAGGAAAGCTGTGCTCCTATACCTGCATTAGTCGCCAGTCAAAAACT  
TGAATTTGTTAGCACACCAAAGGTTCTTAAATTTATTGTGAACATCAACCTAAGCCACCAA  
TAAGAGAGGGAAAATGGACCGAATAAGGCAAAATACCAAGGTGGGTGTAGTAGAAGGGGAGCTA  
AATCCAAGAGAATCATACTACGCCAAATCTTGGTCACTCCAGACAGTAAAGAGGCAGA  
GAAAATGTTGGAAGATTTTCGATTTACACATAGCGGCTACACATCAATTGAAGCGAGTAGCG  
GGAATATTGTTCTGGCTATGCCAAAAAACTACCGGAAGTTTGATCACATCGACCAGGTGCG  
TTTCTATACGGCAAGGCAAGCGTGCGAATGAAAACGGCGAGGTGAGGGGTGTGGTGACTGC  
ATTTGACTTAAACATCCGCAATTGGGGACGAGATTGATTTTGAGTGGCTGGGTGGTGAATTA  
TGACGGCCCAATCAAATACTATTTCTCAAGGGCATTGGATTACACAAGAATGCAAAGATTT  
CCCGTAGGCGCTGACACTTGGGCCACTTACCACACTTATGAGATTGATTGGGACCCGGATAG  
GATAATATGGTATGTTGATGGTAAAATAGCTCGCACAGTCTGAAGAAGGATACCTGGGACC  
CCATTAGTAAAGAATATAGGTACCCACAAACGCCGATGAGACTAGAAATCGCTGTTTGGCCA  
GGCGGCTCGGAAACCAACGGACCCGGTACAATAAACTGGGCAGGTGGCCTCATAGATTGGGA  
AAATTCACCCGATATTATCGAAAAGGGCCAATTTACGGCGCATGTTGAACAAATCACCGTAA  
CGCCGTACCAAAAATAATTCACAGAACAAGTGCAGTTTTGTATAAAGGC AAAGAAAAAGGCA  
CCAACCTTTTCCCAAAAAGATTTGTCAAGAGTAGTCGTTTCGTATAACAGGCAAGACAGACT  
GAATCATCATGATGAGGGGTCTCTCAAATGGGACTGCTTTGTTACTCCAAAGATAAATGACT  
GGTTGAGTTCTTGGAAACGGTCAAATAG

>YIR036C 1.51 Hot

ATGGGCAAGGTTATTTTGAATTACAGGTGCCCTCCCGTGGGATTGGCCTGCAATTGGTGAAAAC  
TGTTATCGAAGAGGACGATGAATGCATCGTCTACGGCGTAGCAAGAACGGAAGCTGGTCTGC  
AGTCTTTGCAAAGAGAATACGGTGCAGACAAAATTTGTCTATCGTGTCTCGACATCACGGAC  
AGGTCCTCGAATGGAAGCGTTGGTGGAGGAAATCCGGCAAAAAGCATGGAAAACCTGGACGGTAT  
TGTCGCAAATGCGGGGATGCTAGAACCGGTGAAGTCCATCTCCAGTCCAACCTCCGAACACG  
ACATCAAGCAGTGGGAACGGCTGTTTCGATGTGAACTTTTTCAGCATTGCTCTTTTGGTGGCA  
CTGTGTTTACCCCTCTTGAAGAGCTCGCCATTTGTAGGCAACATTGCTCTCGTCAGCTCTGG  
AGCCAGTGTGAAACCATATAACGGATGGTTCGGCGTACGGCTGCTCGAAAGCCGCATTAACC  
ACTTTGCCATGGACATTGCCAGTGAAGAGCCCAGTGATAAAGTGCCTGCCGTGTGTATTGCA  
CCGGGCGTCGTTGACACGCAGATGCAGAAAGATATTAGGGAAACATTGGGTCTCAGGGCAT  
GACACCCAAGGCTCTCGAGAGGTTTACTCAATTTGTACAAGACTTCGTCACCTGCTGGACCAA  
AGGTGCCTGCGGCGGTACTAGCGCAACTCGTCCTGAAAGGTATTCGCGACTCTTTGAACGGT  
CAATATCTCCGCTACAACGATGAGCGACTGGGGCCGGTGCAGGGCTAG

>YJR076C 2 Hot

ATGTCCGGAATAATTGACGCATCTTCTGCATTAAGAAAAAGAAAGCATTGAAAAGAGGTAT  
AACCTTCACTGTGATGATCGTGGGCCAGTCCGGATCTGGTAGATCGACTTTTATAAATACTT  
TGTGCGGTGAGCAAGTTGTAGACACTTCGACGACAATCTTGTACCCACAGATACGTCCACA  
GAAATAGACTTACAATTGAGAGAGGAGACGGTCAATTAAGAAGATGATGAAGGTGTCAAGAT  
TCAACTTAATATCATCGATACTCCGGGATTCGGTGAATCTCTCGACAATCTCCATCTTTG  
AAATCATTTCGACTACATTGCGCCACCAATATGATGAAATCTTATTGGAAGAAAGTGCCTGTG  
AGAAGAAACCCAAGATTTAAGGACGGCAGAGTTCATTGTTGTCTTTACTTAATCAACCCAAC  
TGGCCACGGTTTAAAAGAGATTGATGTGGAATTCATCAGACAGTTGGGATCCTTAGTTAACA  
TCATCCCTGTGATCAGCAAATCAGATTCTTGACAAGAGATGAACTGAAACTGAATAAAAAA  
TTGATCATGGAGGATATCGACAGATGGAACCTGCCAATTTATAATTTCCCTTTTCGATGAAGA  
TGAAATATCAGACGAAGATTACGAAACCAATATGTACCTACGTACACTCTACCTTTTGCTA  
TTATTGGATCCAATGAAGTTTACGAAATGGGCGGCGATGTTGGGACAATTCGTGGCAGAAAG  
TATCCATGGGGCATACTGGACGTGGAAGATTCATCGATCTCTGATTTTGTATCTTAAGGAA  
TGCGTTATTGATCTCTCATTTACATGACTTAAAAACTACACACATGAGATATTATATGAAA  
GATATAGAACCGAGGCATTATCAGGTGAATCTGTGCGGCGAGAATCCATACGTCCAAATCTG

ACAAAATTGAATGGTTCGTTCATCGTCCACCACAACAAGGAGAAACACAAATCCCTTCAA  
 GCAAAGTAATAATATTAATAACGATGTTCTCAACCCAGCATCCGATATGCACGGGCAAAGCA  
 CTGGCGAAAATAACGAAACCTACATGACACGTGAGGAGCAAATACGGTTAGAAGAAGAGCGA  
 CTAAGGCATTTGAGGAGAGAGTTTCAGCAAGAAGTCTGTTGAAAAGACAAGAAGTGTGCA  
 AAGAGAAAAGGAATTAAGAGAAATTGAAGCCAGGTTGGAAAAAGAGGCGAAAATCAAACAGG  
 AAGAATGA

>YGR156W 2.64 Hot

ATGACAGATCCCAGAAGAAGAACAGGCCGTCATTTCTTGACACCGGAGAATTTATCCTCTAC  
 ATTACAAATCACAAACTTACCTCCAGAATGGAACCAAGATATAATTACTTCGGTTCGTGGCCG  
 GTTCTGGTCCAGTTATAGATATAAAAGCTAAGAATGACCCGAGAAGTGGTAAACTAACCGGT  
 GACTGTTCGATTATTTGACTAGTAAAGATTGTAACCGCGCTTGGGAAATTTTAAATAGAAT  
 TGAAAACCTTTCCCGTAAAGATAGAGCAAATAATCCCACCAAATTATAAGGACCATCTTAGAG  
 AAACAGCAAATAAAAATTCTCAAAGCAGGTATTACAACCTAATAGAGATTCGTACCCCTTC  
 GAGGCGGGTTTGGAGCTACCTTTCGAAATGGTGACAGAAGTCCCCATTCTTAGGCGACCACC  
 GCCACCACAGGCTGCAAATAACACAAACTCTGTATCAAATAACACAAACATTCAATTCCCCG  
 ACATACTAAGTAAAGCATCTAAACACTTGCCAAGTTTCCAAGATGGCTCGATTATTGCACCA  
 GACAAAATTTACAAAATTTAAGTAAAATTCGCGCGTTGCAACTTATTGAAATTATATCAA  
 TTTGAAAATATTATCAAACCAAGAAAACATCCAAAATCGCAATTAGAATCTTTCTTAGATA  
 CTAACAGTGATATCACAATATCAGTGACCCAAGCCCTACTAGAAATGGGATTTATAGACTAC  
 AGCGTGGTGACTAAAGTGTGAAATCCCAAGTTGGCGAGGCCCATCTTTGCTTTCGAGTAA  
 TAACACAAGTAATTGCAACACCCCGTAAGCGTAATTAGAAATAACACTCCGTTGCATGTAC  
 CTTCTAATGAAGTCAGCAACAATCCTAACAATATGCCACTGAACGTAGCTATGCCAATGCCT  
 ATGTCGACACCACATTTATCCCTTTACCTCTGCAACAACAACCGTTTCGGTTTTGCGCCACC  
 GGGCCCTTTCATGCCTCCAGCTCAAGGCCCTCCATGGGACAGCCTGTGTTGGCAAATCAAC  
 TCGGCCAGGTCCAGCAACAAAATATAAGTTCTACAGAAGGACCCTCTAACGCGAATAAAGCG  
 AATGACAGCGGCACCATTAATATGGCGAAACTGCAATTACTACCTGAAAACCAACAAGATAT  
 GATCAAACAAGTTCCTTACTTTGACACCTGCCAGATCCAAAGTTTACCAAGTGACCAGCAAC  
 TTATGGTGGAAAACCTTTAGAAAAGAATATATAATCTAA

>YPL048W 1.75 Hot

ATGTCCTCAAGGTACTTTTATATGCTAACTTCAGAATTAGAAGTTGGGTCCCAAGAGGTCTTGT  
 CAAGGCTTTGAAGCTGGACGTTAAGGTTGTTACGCCAGATGCCGCCGCTGAACAGTTCGCAA  
 GGGACTTTCCCTTGAAGAAGGTTCCGGCTTTCGTGGGTCCAAAGGGTTACAAGCTAACCGAG  
 GCAATGGCGATTAACCTATTATTTAGTAAAGCTTTCACAGGACGACAAGATGAAGACTCAACT  
 TTTAGGTGCCGACGATGACTTAAATGCCAAGCGCAAATCATCAGATGGCAATCTTTGGCCA  
 ACAGTGATCTGTGCATCCAGATTGCCAACACCATCGTTCCCTTGAAGGGCGGCGCCCCCTAC  
 AACAGAAGAGCGTTGATTCTGCGATGGACGCTGTTGACAAGATCGTCGACATCTTCGAGAA  
 CAGATTGAAAAACTACACCTATTGGCTACGAAAACATCTCCTTGGCCGACTTGGTGGCTG  
 CCTCGATTTTACCAGATACTTTGAAAGCCTGTTCCGTTACTGAATGGAGAGCTCAACATCCA  
 GCCATCGTGAGATGGTTCAACACCCTTAGAGCCTCACCCCTCTTGAAGGATGAATACAAGGA  
 TTTCAAGTTCGCTGACAAGCCATTGAGTCCCCCTCAAAGAAGAAGGAAAAGAAGGCCCCAG  
 CCGCCGCTCCCGCCGCTTCGAAGAAGAAGGAGGAAGCCAAGCCAGCTGCTACCGAAACTGAA  
 ACTTCTTCCAAGAAACCAAGCACCCATTAGAATTATTGGGCAAGTCAACTTTCGTTTTGGA  
 TGACTGGAAGAGAAAGTACTCCAATGAAGACACCAGACCAGTTGCTTTACCTTGGTTTTGGG  
 AGCACTACAACCCAGAAGAGTATCCCTGTGGAAAGTCACCTACAAGTACAACGATGAATTG  
 ACTTTGACTTTCATGTCCAACAACCTTGGTCGGTGGTTTTCTTCAACAGATTGTCCGCCTTAC  
 CAAGTACATGTTTCGGTGTCTGGTAGTCTACGGTGAAAACAACAACAACGGTATTGTTGGTG  
 CAGTTATGGTTAGGGGCCAAGATTACGTTCCAGCTTTCGATGTGCGACCAGATTGGGAATCT  
 TACGACTATGCAAAGTTGGATCCAACGACGACGACAAAAGAATTATCAATAACATGTG  
 GGCTTGGGATAAGCCAGTTTCCGTCAATGGCGAACCAAAAGGAAATTGTTGACGGTAAGGTCT  
 TAAAATAA

>YHR018C 4.21 Hot

ATGTCAGACGGCACTCAAAAACCTATGGGGTGGGAGATTCACCTGGTGAAACCGATCCTTTGAT  
 GCACCTTTACAATGCGTCTCTTCCGTATGATTATAAGATGTATAAGGCAGATTTAGAAGGAA  
 CTAAGTATACACAGCGGGCTTGCAGAAGTTGGGTCTTCTAACGGAGACAGAATTGGCAAAG

ATCCATGAAGGTTTGGCTGAAATCAAAAAAGAATGGGACGCTGACAAATTTGTCCGTCATCC  
AAACGACGAGGATATCCATACTGCGAATGAAAGACGTCTTGGTGAACATAATTGGCCGCGATA  
TTGCTGGTAAAGTCCACACCGGTAGATCCCCTAATGATCAAGTTGTTACCGATTTGAGAATA  
TACTGTCGTGACATTTGTCAATGACACCCTCTTTCCAGCTTTAAAGGGCTTGGTTGAAGTTCT  
AATTAAGAGGGCCGAAGGTGAGATAGATGTCTTAATGCCAGGCTACACACATTTACAAAGGG  
CACAACTATTAGATGGTCTCATTTGGTTGAGCTCTTATGCAACATACTTCACCGAAGATTAC  
AAGAGACTGGGTCAAATACTACACAGATTGAATCAATCACCCTGGGTGCAGGCGCTCTTGC  
TGGTCATCCTTACGGCATTGATAGAGAATTTTGGCTGAAGGTTTGGGTTTCAATAGTGTA  
TTGGTAACTCCTTGGTTGCTGTTTCTGATAGAGATTTTATCGTGGAGTTGATGTTTTGGGGA  
ACTTTGTTTCAATGACCATATTTCTCGTTTTGCTGAAGATTTGATTATATATTGTACAGCAGA  
ATTTGGTTTTCATACAGTTGAGCGACGCTATTTCAACAGGTTCTTCTTTAATGCCTCAGAAGA  
AGAATGCAGACTCGTTAGAGTTGTTAAGAGGTAAATCCGGTAGAGTATTTGGTGATCTGACA  
GGATTTCTGATGAGTTTGAAGGGTATCCCATCTACTTATGATAAAGACATGCAAGAAGACAA  
AGAGCCACTATTCGATTGCTTAACAACGTAGAGCACTCCATGCTGATTGCCACAGGTGTTA  
TTTCTACCTTAACTGTAATAAGGAAAAGATGGAAGCTGCTCTCACGATGGATATGCTAGCT  
ACCGACTTGGCAGATTACTTGGTCAGAAAGGGTGTTCATTTCAGAGAGACTCATCACATATC  
TGGTGAGTGTGTCGCTACTGCTGAAAGACTTGGTCTAAGCGGTATTGATAAATTAACCTTGG  
AGCAGTATCAAAAGATCGATTGAGATTCGGACAAGATCTTTTTGAAACTTTTAACTTTGAA  
CAAAGCGTTGAAAGACGAGATGCTACTGGTGAACCGCTAAATCTGCTGTATTGAAGCAATT  
GGATAATTTGAAATCCCAATTAAATTAG

>YKL102C 1.59 Hot

ATGTGTGCTTTTATTCGCTGAGGTTTTCATCGACAGCTGCAGCCAGTTGTTTCATTCGGTGTCT  
CTTGTGCAGCGGCTCAAATTTGTCAGGCTTGTAGGCTCCGAACGCCGTAAGGTACTTTATG  
TTTTTAATGTCAACGTTTGAAGAAAATGTCATCCTATTACTTTCTGAGGCATGATAACATT  
GTAATCCCTTATCTCTTGCCTTGTGGTATCAGATAAAGAAGCATCAAACAAGAACCCT  
CCTTCCTTTTCTCATGGATAAAGAGAGGTCGCACCATTTCTGAGGAATATGAATTAG

>YLR237W 1.51 Hot

ATGAGTTTTCGGTAGTAAAGTCTCCAGGGCTTTGAGATTTTTGGAAATTCCTGTCAAAGACAG  
GGCATCTGTGAGTTTCTTGAAGAACC CGGATTGCAACCTATTAAGTCGGCTAACCAAACAT  
GGGGTTCTGGTCTAATTTTGCATATTGGGGTGTATGTCTTTTTCAGTGGGTACATGGATG  
AGTGCCTCTTCTGCCTAGGTGTTGGATTAAGTTACCCAGAAACCATTGGTACATTTATCGT  
CGGTGATGTGTTGACCATTATTTTACATTGGCAAACCTCGTGTCTGGTTACGACTGGAAGG  
TCGGTTTTCACTTTGGCCCAAAGATTCGTCTTTGGTATTTACGGTTCTGCCTTCGGTATCATC  
ATCAGAATTTTGTGAGTATTGTCAACTACGGGTCCAACGCTTGGGTGGGAGGTCTTTGTAT  
CAATATGATCTTGGATTTCATGGTCTCACCATTATTTGCACCTGCCAAACACCTTATCTTCGA  
AAGTTGCCATGACCCTAAAGAATTAATTTGGTTTTTATCATCTTCCACGTCCTTACTGCATTC  
TGTTACTTAAATGAAACCCTACCACATGAACTACATTTTAAATTTGGTTCGTGTGTTGCTACATT  
TTTCTCTATGTTGGGTATGGTGATCTATTTAGCTAAACAGGCTCACGGTGTGGAGAATTGT  
TTACCTCCACTAAATCCACTGCCACTGGCTCCACCAAAGCTTGGGCTTGGGTTTATATGATC  
TCGTACTGGTTTCGGTTCCGTTTCTCCAGGTCCACCAAAGTGAATTAATCGAGATTTGG  
TTCCCTCCAATTGGGCTATCTGGGCCGGTACCATCTGTGCATTGTTAATCCAACCACTTTAA  
TCCAGTTTTTGGTGTATTGTTGTCCTCCACCTGTGACAAACTATAACGGTGAACAATATGG  
ATGCCATGGATATCTTCAACCATTTGGTTGACAACCTAATCTGCAAGGTGCTCGTGCCGG  
TGCGTTCTTCTGTGGTCTTTTCAATTTGTCTATCTCAAATGTCTTACACCATCTCCAACCTGTG  
GGTTTGCCAGTGGTATGGATTTGGCCGGTTTATTACCCAAGTATGTGACATCAAGAGGGGT  
GCCTTTTTGGCCGATGTGTCTCCTGGGCTTGTGTCATGGAACCTTCTACAACCTCTTCTTC  
TACTTTCTTACTGTCATGAGTTCTTTCCGGTGTGTCATGACTCCTATCATTCTGTGTCATGA  
TTTGGGATAACTTCTTGTGATCAGAAAAAGACAATACTCCATCACTAATGCCTTTATTCTCAAG  
GGTGAATACTATTTCACTAAGGGTGTAACTGGAGAGCTATTGTTGCCTGGGTTTGTGGTAT  
GACCCCGGTCTACCTGGTATTGCTTGGGAAGTCAATAATGACTATTTCCACAACACTGGTA  
TTGTCAATTTCTTTTACGGTGACTCCTTCTTCTCGTTTTTGGATCTCCTTTTTCTGCTATTGG  
GGACTATGCCTCCTTCCATTTCAAATTAATGTCAAACATGATGACAAAGATTATATGG  
TGCTTTTACTGACGAAGAAGCAAGAAGAAGGGCATGGTTCATACAGTGAAATTTCTGAAG  
AAGAAATCCGCGCTTACACATTAGGCGAAGGTTACACTACCGGCCACGAGTACAGACCTGAA

GGCTCCGACGATGAAATACCTGAGTTGGTCAAACCTAGCTCTGAAAACACCAATGAGTTTGA  
AATAGTTCATCATAAGAATAATGAAAAGCAATCCTCCACCGCCAGTAAAAAGCTGCTTAG

>YER019C-A 1.89 Hot

ATGGCAGCTTCAGTTCACCAGGAGGTGAGCGTATCTTGCAGAAGAGAAGACAGGCACAATC  
CATTAAGGAAAAGCAAGCAAAACAAACGCCACTTCCACCAGACAGGCTGGTTACGGTGGGT  
CTTCAAGCTCAATTTTGAAGTTATATACGGACGAAGCCAATGGATTTCAGAGTCCACTCCCTT  
GTCGTATTGTTCTTATCTGTGCGTTTCATCTTCTCCGTGATTGCTTTGCATCTATTGACGAA  
ATTTACACACATTATATAA

>YLR236C 1.54 Hot

ATGCATACTATTTGCCTTAGAAGCCCGATCGATGAATCCTCTCCTCTTCCATATAAATCAAT  
AAGGCAACCTCTAGAAAACGCCATTCCTGCCAAGCGCTTTGCAGCCTTATGGCCGTACTCT  
GTGCATCCGCTGCTCATCGGCTCTCTGAAACCTTCCCTATGCGTTTGGTAGTCGCGCGTGAA  
TATGCTAATTGGGGCGCCTTCCAACATGCGTTTACGCGGCGCGCTGGAGCTTCTGTGGCGGC  
GACTTCTGCATGGTTTGATGCAGTTGCGGCTGGTACTGAAAATGCACATATGCAGTCAGCTG  
AATCATGCAATTAA

>YLR235C 1.53 Hot

ATGCTAATTGGGGCGCCTTCCAACATGCGTTTACGCGGCGCGCTGGAGCTTCTGTGGCGGCG  
ACTTCTGCATGGTTTGATGCAGTTGCGGCTGGTACTGAAAATGCACATATGCAGTCAGCTGA  
ATCATGCAATTAAGCGGAGAGCTTTTTTTGAAGACAAAGGGCGGCAAAAACGCCCTTACATGGA  
TGCCTTGACACGGTCATAAACTTGCAAGAGAGTATTCTTGCAGGCATTCGTCTTGTGCCAGT  
ACTTCTATACTTCTCGACTATGTCTTTTACAACATCAGTCTTGGAGGCATGACCTTCGCAG  
ATTTTCTTGAGGCTTGTCTCCATTTCTCTGCGCTGGAAGGGCTTTGCAAAGGAGTCTTCGAG  
GCCGATGGCCTCGAAGCCGTGCACTAG

>YAL061W 2.29 Hot

ATGAGAGCCTTAGCGTATTTTCGGTAAAGGTAACATCAGATTCACCAACCATTTAAAGGAGCC  
ACATATTGTGGCGCCGATGAGCTTGTGATTGATATCGAATGGTGTGGTATTTGCGGTACGG  
ACCTGCATGAGTACACAGATGGTCCATCTTTTTTCCCAGAAGATGGACACACACATGAGATT  
AGTCATAACCCATTGCCACAGGCGATGGGCCACGAAATGGCTGGTACCGTTTTTGGAGGTGGG  
CCCTGGTGTGAAAACTTGAAAGTGGGAGACAAGGTAGTTGTGAGCCACAGGTACATGCA  
GAGACCGGTATCGTTGGCCCCGTGCGCCAAACGTTGACAAGGAATGGTGCAGCTGCTTGCAA  
AAGGGCTACTATAACATTTGTTTCATATTTGGGGCTTTGTGGTGCGGGTGTGCAGAGCGGTGG  
ATTTGCAGAACGTGTTGTGATGAACGAATCTCACTGCTACAAAGTACCGGACTTCGTGCCCT  
TAGACGTTGCAGCTTTGATTCAACCGTTGGCTGTGTGCTGGCATGCAATTAGAGTCTGCGAG  
TTCAAAGCAGGCTCTACGGCTTTGATCATTGGTGTGTCGGCCCATCGGACTGGGCACGATACT  
GGCGTTGAACGCTGCAGGTTGCAAGGACATCGTCTGTTTTCAGAGCCTGCCAAGGTAAGAAGAG  
AACTGGCTGAAAAAATGGGTGCCAGGGTTTACGACCCAACTGCGCACGCTGCCAAGGAGAGC  
ATTGATTATCTGAGGTCGATTGCTGATGGTGGAGACGGCTTCGATTACACATTTGATTGCTC  
CGGTTGGAAGTCACATTGAATGCTGCTATTCAGTGTCTCACTTTTCAGAGGCACCGCAGTGA  
ACTTGGCCATGTGGGGCCATCACAAGATACAGTTTTCTCCGATGGACATCACATTGCATGAA  
AGAAAGTACACAGGGTCCATGTGCTACACACACCACGATTTTGAGGCAGTAATAGAAGCTTT  
GGAAGAAGGCAGGATTGACATTGATAGAGCAAGACATATGATAACGGGCAGAGTCAACATTG  
AGGACGGCCTTGATGGCGCCATCATGAAGCTGATAAACGAGAAGGAGTCTACAATCAAGATT  
ATCTGACTCCAAACAATCACGGAGAGTTGAACAGGGAAGCCGATAATGAGAAGAAAGAAAT  
TTCCGAGCTGAGCAGTCGGAAGATCAAGAAAGACTACGAGAATCAATAAACGAGGCTAAAC  
TGCGTCACACATGA

>YOR138C 2.11 Hot

ATGATGGATAATCAGGCTGTAAAGTCACTGCTAGAAATGGGTATTCCACACGAAGTAGCTGT  
GGACGCCCTCCAAAGAACTGGCGGTAATTTGGAGGCAGCAGTTAACTTCATCTTTTTCGAACG  
AGCTGCCGGAGCAAGCGGAAATGGGTGAGGAGAATGATGGCAGTCAGCCTAGGATTTCTGAG  
AACAAAATAGTGGCTGGAACCAAGCCCTGCGATGTTCCGAACAACGGGGACCAAGACATTGA  
TATGCCGGATGTGAGTGGTGTGATGTTGATTATGATGACGATGAAGACATCACGGATGAAC  
GCAGCGGTTCTAATAGCACCAGCGGATGCAGGGTTACTGCTCAGAACTACGATCGTTATTTCT

ATATCGGAGACATCCATTCCCTCCCCCTCTTATAGTATAGTACAACACAACGAGTTCAAGTC  
 GAACGTGGGCGATCCTACGGTTGTGTTGCCGCTACCCTTGAATAGTCTAATTGAGAGCTATT  
 TTGGGCTGTTTGCCTGCTCACGGCCGTGATTTCCACACGTGTTCTTGAAACCGGACTTT  
 AAGGATTTGAACTATAGGGCAGACTGGTTCAAGGGCTCATCGTTTACGGAGCCCAAATACAG  
 ACTTGCATATTGCGAGGCAGAAGATGGTTCCACTACGTGCGAGATCGTGCTGGCCAGCGGAC  
 CTAATGAAGGGTTGCAACCGCATCTGCTCTGGCAGTTGCAAAAACCTCATCTCCGTGGTTAAC  
 ACGCGAAAGTGTGAAAGAGCCTTTGTTTCGGCCAAGGTGTTTACGTGCTCCTTGGAACCGCA  
 ATTGAGGTCCAAGCTGGCCGATTCCGAGCATCTTTATGAGGTGCTCCCAGCGTTTATCAAAT  
 CATTTGGCAGTGGATTTGGAAAATGTGCTCCTGGGATCAGAGACCGGGAAAACAAGAAGTCTCTTT  
 ATATCTTCTGCTTTGCATACTCCGAACAAGAATGAACCTCCAATGGAGACGTTTTTGTCTCT  
 GTTTCATTTTTCTTCCCTGAAGAGTACGATTCTAATCTATATAAAATGTTCAACGTTTTATTTGT  
 ACCCCGAAGAAGAGGAAGAAGAAGACGTGATTCGTGGTGGCGAGCAAGAAGAGGGCGAGA  
 TATGTGGAACCGGAGAATACTTTGAAGGAGGTGGCACCCGTATTAACAATCCTGTTCAATGA  
 ACTAGAAACAAAACAGAATCAGTGTCTCTACCCAATGGCGTGGATATACCGCTTGAGTTTT  
 ACCCACAGCTTTACACCAAACAGTGCAAAGACCAACTAATAAGACATATTTATTTCTAAACGA  
 AAGCAAGCGCGGACCAGATCCAGATGCTTGGCTTCAAGAGATCAACGAGTTAAAGAGTTACCA  
 AGGCAAAAACATATCCACTATTTCTAGAGTCGACGCTGGCGTATCTACAAAACATTCCTGACG  
 ATGCTAATAATGAAGCAGCAAAGCAGATCGCATCGTTGAAAAGATACATTAATTTCTGCGAGA  
 GCCGCTAAAATGGAGGAATATAAGGACTTGGCGTCCAAACTGCATGGAGAATGGAACCTTTC  
 ACATCCAGAGACACACATAATCAACACTGCAAAGCAATTGGGACTGATCGAAAATCCCTACA  
 TCCTCACAATGGCAGCACTATCGCCATATTCATACTTTATCAGAAGCAGAAAACGGTGCATGG  
 TCATGGATACAAAAGTAATACGTTGGGAACAGAATTCGAAGGTGAAAAAATGTTTCGTGCGCTTC  
 TGTCGTTCAAGAAGCCATCAAGCATGGCACGAAGTACGCAAGTGAAACTCCGCTGATGTTCA  
 TATACTGTGAAGAGGGTAAAATTTCCACGGAAGAAGTAGTCGCGGAAGCGTTGAAAAGCAAT  
 AGCGGGTGCTTAAAATTTGCTGAGGATGACCAAAATTCATTAAAAACATTGCGTTTCGCAATT  
 TTTTCGATGGTATGGGAGATCCTGAACAAGCCACCAACAATATTAACAATGGTAACGATAATG  
 ACAATGACGATGACATCGATTCTGATAATTAG

>YLR100W 1.53 Hot

ATGAACAGGAAAAGTAGCTATCGTAACGGGTACTAATAGTAATCCTTGGTCTGAACATTGTGTT  
 CCGTCTGATTGAAACTGAGGACACCAATGTCAGATTGACCATTGTGGTGACTTCTAGAACGC  
 TTCTTCGAGTGCAGGAGGTGATTAACCAGATTAAGATTTTTTACAACAAATCAGGCCGTGTA  
 GAGGATTTGGAAATAGACTTTGATTATCTGTTGGTGGACTTCACCAACATGGTGAGTGTCTT  
 GAACGCATATTACGACATCAACAAAAAGTACAGGGCGATAAACTACCTTTTCGTGAATGCTG  
 CGCAAGGTATCTTTGACGGTATAGATTGGATCGGAGCGGTCAAGGAGGTTTTTACCAATCCA  
 TTGGAGGCAGTGACAAATCCGACATACAAGATACAACCTGGTGGGCGTCAAGTCTAAAGATGA  
 CATGGGGCTTATTTTCCAGGCCAATGTGTTTGGTCCGTACTACTTTATCAGTAAAATTTCTGC  
 CTCAATTGACCAGGGGAAAGGCTTATATTGTTTGGATTTTCGAGTATTATGTCCGATCCTAAG  
 TATCTTTTCGTTGAACGATATTGAACTACTAAAGACAAATGCCTCTTATGAGGGCTCCAAGCG  
 TTTAGTTGATTTACTGCATTTGGCCACCTACAAGACTTGAAAAGCTGGGCATAAATCAGT  
 ATGTAGTTCAACCGGCATATTTACAAGCCATTCCTTCTCCGAATATTTGAATTTTTTTCACC  
 TATTTTCGGCATGCTATGCTTGTCTATTTGGCCAGGCTGTTGGGGTCTCCATGGCACAATAT  
 TGATGGTTATAAAGCTGCCAATGCCCCAGTATACGTAACCTAGATTGGCCAATCCAAACTTTG  
 AGAAACAAGACGTAAAATACGGTTCTGCTACCTCTAGGGATGGTATGCCATATATCAAGACG  
 CAGGAAATAGACCTACTGGAATGTCTGATGTCTTCGCTTATATACAGAAGAAGAACTGGA  
 ATGGGACGAGAACTGAAAGATCAAATTTGTTGAAACTAGAACCCCCATTTAA

>YJL123C 1.6 Hot

ATGTCGAAAATAAGAACTCTGAGGCTGAAGACGTATTTGAATTTTTTAGATTCTTTGCCAGA  
 AGCAAAGAATGGCGGGAAAATGGTTAATACTGACGTAAAGGGTAGCCAAGAAGGCGTTAAGG  
 GAGGTTCTAATCTGTGGCGGGCAAGACCGGGAATGATGGAAAGAAAGGTGACGATGATATC  
 TTTGAATCTTAGAAGAGTTGGAGAAGAGTAACTTAACTTAACTGACAAGAAAGGGGTTGA  
 AAAGAAGGCTCCAGTGAATCAGTTAATAATAAAGCACAAGACGAAAAGTAGAAGAATCAA  
 AAGAAAACAAAAATTCGGAGCAGGACGCTCACGGAAAGGAAAAGGAACCACAGCAGCAGGAG  
 AAAGAAGAAGAAGAGGAGGAAGAAGAAGAAGAAGAGGAGGAGGAGACCCCATTTGCA  
 TGACCCAATTTGCTTCTATTTCAAACCTGGTGGTCTCCTCTGGATCCGCAAAGGTATCGAGTA  
 TTTGGAATAAAAACCTGCAGAACAAGCATCCCAGATCAAAAACCGACTTGCCCAAGAACAGCTT

GATTTGACTTCAAAGATAAACACGAGCACGATTACTGAAATAGCCAGAACTTACAGAAAAT  
 CGTTGTTGGTGAGACTGAAGAGGTGCTGCGAATTCATCTAGTCCATGATTTGGTAACTATC  
 CCTCATTACAATACAATATTGAAAGCAAGTTTGATCAAGTCTAAGCTCACAAGTTGAGGGA  
 GGAATCAGAATATTTGTAGATGAATGGGGCCATCCTAACATAATGGAATTACACCTGTGGA  
 AAAAAAGCCTTCAGTTGCAGACGGTGAGTTAGGCAACTCTAAAAAAAATTACAGTTAATC  
 TATTCGACGGCAAGGTAACAGACGGTGAGAACTGGCATTGCAAACCTGGAAAATGCAGTC  
 AAACCTTCAATACTGCACATGAGGAATACCAGAAACAACAGAAAGAGGCTGATGCCACTCC  
 AGATGACGATAGGAGTTCTATTAGCAGTAACAGCAATAAAAATCAGTGATTTATTCATATCCA  
 TCTTACCAATTGCCATTCGCAAAAACAAAAAGATGCCGACGGTGACTTCAAGTGACCGAC  
 TCCAATACGCCAGGCAATTTCAATTTCAACCTTGTATTGAAAGACATAACTAACGATATTAC  
 CACCATAACAAGATCACAAGGATTCCTGTCAAATGGGTCAAATTGGCTAGAAGGATCCGTGG  
 AGAAAACAGGATCAACAGCAAGTGAGGAGAGGAATAAGTCATACGATCAAAAAGAAACAAAA  
 GAAAGTGAAGACGAAGACGAAGACGATGAGATCATTGATCCTAGTGAATGGGTAAAGGAATG  
 GATCGAAGATGGATTAAGCTTGTCAATTTGGGGTCATGGCACAGAATTATGTCATTGACCGTA  
 TGGGTCTTTGA

>YKL192C 1.56 Hot

ATGTTTAGATCCGTTTGCCGCATTTCTTCCCGCGTGGCACCTTCTGCGTACCGCACTATAAT  
 GGGCCGTTCCGTTATGTCCAACACCATACTCGCACAAAGATTTTATTCTGCAAACCTTGAGCA  
 AAGATCAGGTTTCTCAAAGGGTCATTGATGTTATCAAGGCGTTTGATAAGAACTCTCCCAAC  
 ATTGCCAACAAGCAAATCTCCAGCGATACCCAATTTCAAGGATTTGGGGTTGGACTCCTT  
 GGACACTGTGAGCTGCTCGTAGCTATTGAAGAAGAATTTGATATTGAAATCCCTGACAAAG  
 TGGCTGATGAGTTGAGAAGTGTGGTGAACGGTTCGATTATATCGCTTCCAATCCCGACGCA  
 AACTAA

>YGR192C 1.72 Hot

ATGGTTAGAGTTGCTATTAACGGTTTTCGGTAGAATCGGTAGATTGGTTCATGAGAATTGCTTT  
 GTCTAGACCAAACGTGCAAGTTGTTGCTTTGAACGACCCATTCATCACCAACGACTACGCTG  
 CTTACATGTTCAAGTACGACTCCACTCACGGTAGATACGCTGGTGAAGTTTCCACGATGAC  
 AAGCACATCATTGTCGATGGTAAGAAGATTGCTACTTACCAAGAAAGAGACCCAGCTAACTT  
 GCCATGGGGTTCTTCCAACGTTGACATCGCCATTGACTCCACTGGTGTTTTCAAGGAATTAG  
 AACTGCTCAAAGCACATTGACGCTGGTGCCAAGAAGGTTGTTATCACTGCTCCATCTTCC  
 ACCGCCCAATGTTGCTCATGGGTGTTAACGAAGAAAAATACACTTCTGACTTGAAGATTGT  
 TTCCAACGCTTCTTGTACCACCAACTGTTTGGCTCCATTGGCCAAGGTTATCAACGATGCTT  
 TCGGTATTGAAGAAGTTTTGATGACCACTGTCCACTCTTTGACTGCTACTCAAAGACTGTT  
 GACGGTCCATCCACAAGGACTGGAGAGGTGGTAGAACCGCTTCCGGTAACATCATCCCATC  
 CTCCACCGGTGCTGCTAAGGCTGTCGGTAAGGCTTTGCCAGAATTGCAAGGTAAGTTGACCG  
 GTATGGCTTTTCAAGTCCCAACCGTCGATGCTCCTCGTTGTTGACTTACTGTCAGGTTGAAC  
 AAGGAAACCACCTACGATGAAATCAAGAAGGTTGTTAAGGCTGCCGCTGAAGGTAAGTTGAA  
 GGGTGTTTTGGGTTACACCGAAGACGCTGTTGTCTCCTCTGACTTCTTGGGTGACTCTCACT  
 CTTCCATCTTCGATGCTTCCGCTGGTATCCAATTGTCTCCAAGTTCGTCAAGTTGGTCTCC  
 TGGTACGACAACGAATACGGTTACTCTACCAGAGTTGTGCACTTGGTTGAACACGTTGCCAA  
 GGCTTAA

>YFL010C 2.18 Hot

ATGGCTCAAAGTAAAAGTAATCCTCCTCAAGTGCCTTCTGGCTGGAAGGCTGTTTTTGGATGA  
 TGAATACCAGACTTGGTATTATGTAGATTTATCTACGAACAGCTCTCAGTGGGAACCACCAA  
 GGGGAACAACATGGCCAAGACCCAAAGGTCTCCACCAGGTGTTAACAATGAGAAGAGTTCT  
 CGTCAACAGGCAGACCAGGCTCCTCCACCTTATTCTTCTCAATCAACACCGCAAGTGCAAGC  
 AGGGGCCAAAGCACAGCAACCTCGTTACTATCAGCCTCAACAGCCTCAGTACCCTCAATACC  
 CTCAACAGCAGCGTTACTATCCTCAACAAGCCCTATGCCAGCAGCAGCACCACAGCAAGCA  
 TACTATGGAACCTGCGCCAAGCACCAGTAAAGGTAGTGGACACGGCGGTGCCATGATGGGTGG  
 TTTACTTGGTGTGGTGCGGGTTTGTAGGTGGAGCTATGCTAGAACACGCATTTGACGACC  
 ACAACTATGACGGACCAGACACTGTGCTTGTGCGAGAACAATTAATACTACGGTGTGATGCTGGT  
 GGGTCCGACGGCGGATTTGATGATGCTGGTGGGTTTCGACGGCGGATTTGATGATGGATTTGA  
 CCGTAGTGACTTTTAA

>YPR150W 1.52 Hot

ATGAGGAATCGTGTATAAAATCATTTCATATGTATATGCCAAATATTTATTATTTATTT  
 CATCTTTTTTTTTGCTTTTGTGTGTCAACCGCATTTCAGTGCCTTGTCAAACGGCTTCAACT  
 TTCTCATATATATGGGGGCACGTTTTTCCATTCAGGAAAATATTCCATACCCATACTGGAC  
 GTAGACCACCAATTGAATGGCAACAGCTCATTTGGGTACGGTGGGATTGTACTTCCATGTACC  
 GTTCACGCCACCTGACATTATAACCACAGTGCCACGTTCCACCAAACAATATGTTCTTGTGCT  
 TTTTCTCATCGATCGTCTTCGCCCTCTGCGTTTGTCTTCTCGTTCATTGTTAATAACGTTTGC  
 AAGGACTTTCTCTTCTTATCTCTGAATAGCGGGTTTTCTTCACTGGGTACATTACTGGCCT  
 GTATCCGCTATACAGAATATCGCGGGTGAGCTCCCTAGCTTCCAAATACTGTGTAGTAGGTA  
 CTTTGGGCAGCGATCTAAAGTCATAG

>YDR124W 2.41 Hot

ATGCGTATAGGTATGGAAGAGCTTAGAAGGGCGCTGGCGCTGCTAAATGGTCAAGGATATGA  
 GTTTATGGTGTTCATAAAGGAAAAAGACCATTTAATAAGTGAGTCAATTCCAAAAAACTTGT  
 TCTCAGAGAGTTTTATATCATCTTCAATTGAAAAAAACCCTCCACTCACGTTCCGATCCATTG  
 GAAAATAGGAAAAGAATAACTGTTTATGAAGAAAATATCCAACCAGCGATCATGCTACCCTT  
 AGATCAACCCCTACTAATACAGAATTATCTGTATACGGCTTTTAAATTATTAAGACAGGTCC  
 CATGCAAGGCGATTGCTAAGTTGTGGATAAAAAATTATTGAGCCAAGGAAGAAAACCAGGTTT  
 CCATACATTAAGGCAATGCTGGAAGGCCGGAATGGTGGCCAAAAGATGTAGAACATAAAGA  
 GCCGGACCACCTCCAGAAAGCGGATCGACTGAAATTGATGTGCACGATAATTATGAATGTTT  
 TACCGCAATCTCCCTTCAGCCTTGAGATTTTGGACGAGCTTACAGGAGTGACCGCCGCAATG  
 ACCATTTTTTAAGAAAGAAACTGTGAAGAAAAGTAATCATGAAAAATGTTTTCGAAATTGCGAA  
 ATGCTTGTGCAACAAAGATTTCAAGCAGAAAGCCATATCACTTGATGATTTAAATGACCTAG  
 CCCAAAAACAGAAAAAATCATAACCATAGTCGTCGATTTGATGTAAATAAAATGGTTAAGGTA  
 GAAAAAGATTTGTTACAACAGTCAAGTGGAAGCGATTCTTCCACCTCGATGATCCTTCCCTT  
 AAAAGAAAGTGACACAGAGTATTTCCCCAGGGAATATCCGAAAGACCTGTATCGGAGGATT  
 ATTCGAATAGCATATCTCGATTAGAAAATTTAGTGGAATTTGATCCGTTATTCTTCACTAAA  
 TTGGATGAATTAAC TAGTAGCGATGATTGTAAAGATTTTATTTGA

>YJL117W 1.92 Hot

ATGGCGGTTCAACAAAGAAAGAAAGAGGGTAGAAAGTCCGATAAAAAATGCCCCATCGGT  
 CCCACAAGTAGATGCATCATTAGACAAACCACCTTGATATTGATGCTCCTCCTACTATTTACA  
 GTGTTAATTTGAAACCAGAATATGGTACAGCTGCATTGAATTTGTCCGCGGATTTTCATCAGA  
 CAAGAACAGGCATTGGCTAATAAGTATTTGTTCTTCCATCCCGTCATCCTTGTGTTCTAAC  
 CATTGGGCTGCTTATTTACTTGACGCCAAGAATTGCTTTCCGATAAGGAATACAGGATCCG  
 TTGCTGGATGGTCTTACCAGCTGGCTCGTATTAATAAGAAGGTCGTCCTCAGCGGTTTAGTG  
 TTCACCGCAATTTGGTGCATCTTTCTTGTTCACCCTCCTCTCACGTGTATCTGACTCGTATTT  
 CAAGTCGAAGATCAACCAACTTGTGGTTCTAAAGGTGAGAAAGTTTTTCGGCATCAATTTGA  
 ATGATTTGGTGGCAAGACATGAAACAAAGGATCCAGTGGTGAACAATACGCATATCATCGTT  
 TATAGAGAAACGCCCATTTGCATTTGATTTTCGTTAGCCCTAACATGACATTAAGTACTGATGA  
 AAATTTAGTCATGAGTGTACTACTGTGGGTGTGTCGTCGTGTATATGTAAAAAGTGGCATT  
 TCGAAGATTTGATTGATTGGGCTATGCTACACTCCAAAAATATTAGAAGCAGCGGCAAAATAC  
 GGGGAGACCATGAAACTCTTGATTGATGTCTACTCATTGATAGCACGCTTAAGGAAATTTT  
 GAAGAAAAAAGGGTTCACTTATATTCAAAGCATTAGAGTCTCTGAAAAATCGACTACTAGGCG  
 GTTTGTTCCGGTGTGAAGAAGGAATTATGGGGTTTGAATTCATTTTAAAGCCGAACACAAG  
 GACTAG

>YJR024C 2.85 Hot

ATGCTTTCACAAGATGTTCTGATACATTCAGATGATCCGTGCCATCCAGCAAATCTCATTTG  
 CACGCTATGCAAGCAGTTTTTTCATAATAATTGGTGCACCGGAACCTGGAGGTGGGATTTCAA  
 TAAAAGATCCTAACACGAATTATTATTATCTCGCCCCATCTGGGGTGCAGAAGGAGAAGATG  
 ATACCTGAGGATTTGTTTGTTCATGGACGCTCAGACATTAGAGTATTTGCGCTCTCCCAAGCT  
 TTACAAGCCAAGCGCATGTACTCCATTGTTCTTAGCGTGCTACCAAAAAGAAAAATGCAGGTG  
 CTATAATACATACACTCCCAAAATGCTGTGATATGCTCCTTGCTATTTGGCGATGAGTTC  
 AGGATTGCTAACATCGAACAAATCAAAGCAATTCCAAGCGGAAAGGTGGACCCTGTGACCAA  
 GAAACCCATGGCGCTATCGTTTTTTGATACGCTGAAGATCCCATCATTGAAAACATGGCGC  
 ATGAGGACGAGTTGATCGATGACTTGCACAAGACTTTTAAAGATTATCCAGACACATGCGCC

GTAATTGTGAGGAGACATGGCATTGTTTTGTTTGGGGTCCGACAATCGATAAGGCCAAAATTTT  
 CAACGAAGCCATCGATTATTTGATGGAGCTGGCCATAAAGATGTACCAAATGGGGATTCCCTC  
 CCGACTGTGGCATTTGGCGAAGAGAAGAAGCATCTGAAGATGGCCAGTCCGTGA

>YPL015C 1.64 Hot

ATGTCGTGTTTCTACCGCCTCTACAGAGATGTCGGTTAGGAAGATCGCTGCTCATATGAAAAG  
 CAACCCCAACGCTAAAGTAATCTTTATGGTGGGTGCCGGATATCCACTTCTTGTGGGATAC  
 CAGACTTCCGATCTCCGGAACTGGCCTGTACCATAACTTGGCCAGGTGAAGTTGCCGTAC  
 CCTGAAGCAGTGTTCGATGTTCGATTTTTTCCAATCGGATCCTTTGCCATTTTACACTTTGGC  
 TAAAGAGTTGTATCCCGGAAATTTAGACCTTCTAAGTTTCACTATCTTTTGAATTTGTTTC  
 AAGACAAAGACGTTTTGAAGAGAGTATATACCAGAATATAGACACTTTAGAAAGACAGGCC  
 GGTGTTAAGGATGATCTGATCATCGAGGCCATGGCAGTTTTGCTCACTGTCATTGTATCGG  
 ATGTGGTAAAGTTTTATCCCCACAGGTTTTCAAATCCAAGCTGGCAGAGCATCCTATAAAGG  
 ATTTTGTCAAGTGTGATGTGTGCGGTGAACTGGTAAAGCCGGCAATAGTTTTTTTTGGCGAA  
 GATCTACCGGATTCCTTTTTCGGAACTTGGTTAAACGATTCAGAGTGGCTTCGTGAAAAAAT  
 CACGACATCTGGAAAACATCCTCAGCAGCCTCTTGTTCATCGTCGTTGGCACCTCACTAGCCG  
 TTTATCCCTTTGCGTCTCTGCCCGAAGAAATTCCTCGAAAGGTAAAAAGAGTTCTGTGCAAT  
 TTGGAAACGGTGGGCGATTTTTAAAGCTAAACAAGAGGCCTACAGATTTAATAGTTTCATCAGTA  
 CTCGGATGAGTTTGGCGAGCAACTCGTTGAAGAATTAGGTTGGCAAGAAGATTTTCGAAAAGA  
 TACTTACGGCCCAAGGTGGAATGGGGGATAACTCTAAAGAGCAATTACTTGAATTTGTACAT  
 GATTTAGAGAATTTGAGTTTGGATCAATCTGAACATGAGAGTGCAGACAAGAAGGATAAGAA  
 GCTACAGCGTCTCAATGGCCATGACAGCGATGAAGATGGAGCAAGCAACTCCTCTTCTTCAC  
 AAAAAGCCGCTAAAGAATAA

>YJR072C 1.85 Hot

ATGAGTCTCAGCACAATCATATGTATTGGTATGGCCGGATCCGGTAAAAACAACCTTTCATGCA  
 AAGGTTAAACTCCCACCTTGCGGGCAGAGAAAACGCCACCATACGTAATCAATCTTGATCCTG  
 CAGTATTGAGAGTCCCTATGGTGCAAACATCGATATCAGAGACTCAATCAAATACAAGAAA  
 GTGATGGAGAATTACCAGCTAGGTCCGAACGGTGCCATTGTCACCAGTTTGAATTTGTTTCAG  
 CACCAAGATTGATCAAGTTATTAGGTTGGTGGAAACAGAAGAAGGACAAGTTCCAAAACCTGCA  
 TCATCGACACTCCAGGCCAAATCGAATGTTTTGTGTGGAGTGCCTCGGGTGCCATTATCACG  
 GAATCTTTTGCCTCCAGCTTTCCACAGTGATTTGCATATATCGTGGATACGCCTAGAAACTC  
 ATCCCCAACTACATTCATGAGTAACATGCTGTACGCCTGCTCCATTCTGTATAAGACCAAAC  
 TTCCCATGATTGTCGTTTTCAACAAGACCGACGTGTGCAAGGCAGATTTTGCTAAGGAATGG  
 ATGACGGATTTTGAAGTTTCCAAGCAGCAATCAAGGAAGATCAAGACTTGAATGGTGACAA  
 TGGGCTGGGCTCCGGGTACATGAGCTCATTGGTCAATTCTATGTCACTGATGCTTGAAGAAT  
 TCTATTCCAGCTAGACGTGCTGGGCGTTTTCCAGTTTTTACCAGGAGACGGATTTCGACGAATTT  
 ATGCAATGCGTAGACAAGAAAGTTGATGAATACGACCAATACTATAAGCAAGAACGTGAAAA  
 AGCATTGAACCTAAAAAAGAAAAAGGAAGAGATGAGAAAAGCAAAAATCATTTGAATGGCCTGA  
 TGAAGGATCTAGGTTAAACGAGAAGAGCAGCGCTGCAGCCAGCGACAACGACAGCATAGAT  
 GCCATTAGCGACCTCGAAGAGGATGCCAATGATGGTCTTGTGGATAGGGATGAGGACGAAGG  
 CGTTGAGAGAGAATACACGTTCCAGGCGAAGAAAGAAACAAAAGGTGAGGTTCAACGAGAACT  
 CTGCTCCAGACCTACAAAGGAGATATCAGGAAGCTATGCAACAAGTAGGGAAAACGGCCAGT  
 AGCGAGACTGCAGAAAATATCGCGAAGTATATTAGAAACTAA

>YLR226W 1.61 Hot

ATGTCGTGCTACATCTTCAAGTGGTGACGTGAAAAAATTTCAAGCTGTACCAAACCAACGAG  
 CAATGCATCACCACCACCAGCATCGAGTGGGTTTTAACGCAAGGACCCTATGGCCGGATTTGA  
 TAGAAACACCAGAAAACCAGTGGGTTTTTGGAGTGCAAAGATATTATTGAAAAGATAGGCACT  
 AATGGACCGATAGCAGTGGAAATAAAAAAATATGGAAAAATGCTTAATGTACTTTTACAC  
 ACTTAAAAAATAAATCTTTTTGATCACACCTATAACGGCATCATGCATTCTATTTTACA  
 GGTATTGGTTTCATATATGGAATACCTACAGCCATAACTGAATGTATTTCATATATCACAGGGA  
 ATCTGTTGCTACCGCTTGCAAAACAATGGAGAATAATAGGCCATAGAGGCCATATATTAAGGC  
 GACTTGTGAGTTTTTGTGCAAAAATATACCGTCTTTAAAAAGTGAACAAATATTGATAAAC  
 TTAATGGGAATTTAGAGATAAGTTAGTGACGAATGAAAAAATACTATGTTTTATTGTC  
 TTTGACTTAAATATCAGTAATCCAAAAGAAATGATTGAAGAAGTGTTCAGTGGCTATTATAG  
 ATTC AACAGGGATCACAATCTGCCAGAAAACCTTAAAAAAGCTTTTCCAAAATCTTCAAG



AATCAAGAAATTTTATGGTCCAAGCTGTCACCCAGCCAGTTTCTTTATTGTGCGACGGTTAT  
 ACGTTCATTGTACTATCTCTCATATACTGTGGTTTAGAGTATAAAAAGCTTGTAGACAAAGA  
 TTTTCAAGATATCCGAAAACTTCTTCAAGGATAGATTCCCTATCGAAGTAACGCCGAAAAATT  
 TTGCCAATATCTTTACCGATTACAAGTTACTGGAAGAGAATTTTTTCAACTTAAAAAGTAAT  
 AAAGGTGCTAAATTACAAATTGATTCAAGCATGATTGATTTCGGTGATTGACGAAAGTGGCGA  
 TGTGGAAAATGAAGTTTCAGAAATCTCTGATCCGTTTAACTACGAGTTGATTAAATCCGGTG  
 AGGTGAAGGAAGAGTTTTTGAATCATATTGAAACAAGGGTAAAGATTTACTAGATAAGGCT  
 AAACAAGAAAGTATGAAGAGAAAGGCTAAAGATCCTATAAGAACCCAGATGCCAAAAAAC  
 TAAAAATATAA

>YJR116W 2.44 Hot

ATGAACGCCAACTCTACCACGACAGCAATCGGCCTCACCAGCCCCTTCGAAAAGCTGTCCTT  
 CTTCCCTCATTTCGTCTAATTTAATACTGGCTCATTTGCATGAGATCATCTTCAGCTTCGTCT  
 TCTACCAGCTCGCATTCTCCGTTGTCGCACCGTTCTTGAATAAAGTGGTCTTTCGCAAGCAC  
 TACACCAGATCCGTGACCCACTGCTGAAAAATTGATTTCAATGTCCACACCGTCTCGATGAT  
 CCAGGCTGTCGTCTCGAACACCGTCTGTTGCCACCCTCACGACGCCAATGCATTATAATG  
 TTGTCACCTACACAGATTTCGTACAGTTCAATGGTATCTTCCCTCAGCGCAGGGTACTTTATC  
 TGGGACTTGACTATGTGCGTGCGTTACTTCAAGCTTTATGGTCTCGAGTTCACGGGCCACGC  
 CATTGGCTCCGTATATGTGATGCTGTTGTCCTTAAAGACCGTCTGCCAACCCTGGATCGGCA  
 GGTTCCTTATCTACGAGGCTCCACTCCCTTGTGAACATCAATTGGTTCATCATGCAATGT  
 AACGCCAAGAGCAAGAACTCTATCCCTCTGTGGTTTAAATGTCGTCAATGGCCTTTTGCTCAT  
 GACTGTGTTTTTCGTGTCAGGATTTGCTGGGGCTCCATCGCATCCGCTCTCTTATTCAGGC  
 AGATGTGGAAGGTAAGAGACGAGTTACCCAAGTTTTCTGCTGTCACGATGATGTCGCTGAAC  
 ATTTTCATGAACCTTTTGAACGTGCTTTGGTTCAAGAAGATGATTAGAATCGCCAAGAACT  
 TGCAAACCCAGCCCAACGTCGAAGCTAGACTAA

>YLR188W 1.92 Hot

ATGATTGTAAGAATGATACGTCTTTGTAAAGTCCAAAGTTGTTGCGAAGTCAATTCGCATC  
 AGCAAGTGCATATATTCAACCAAGTCATTGTTCAAACCTCCCATGTACCAAAAAGCGGAAA  
 TTAATTTGATTATTCCACATAGAAAGCACTTTTTGTTGCGGTGCGATTTCGATTACAATCAGAC  
 ATTGCGCAAGGAAAGAAGTCCACCAAGCCCACTTTTAAAGTTGTCCAATGCAATTCAAAATC  
 CTCGGGGTTTTAAAGACATTAACCGCTATTTCGTCTTATCTAAACCGGAATCCAAGTACATTG  
 GTCTTGCCCTCCTTTTTAATCCTCATTTCAAGTTCAGTTAGTATGGCTGTACCTCCGTTATC  
 GGTAATTTATTAGACTTGGCTTCCGAAAGTGACGGCGAAGATGAAGAGGGCTCAAAAAGCAA  
 TAAGTTATATGGTTTTACGAAGAAGCAATTTTTTCACAGCATTAGGAGCAGTATTTATAATTG  
 GAGCAGTTGCTAATGCAAGCAGAATCATCATTTTTAAAGGTCACCGGTGAGAGACTGGTCGCA  
 AGATTAAGAACGAGAACAATGAAAGCTGCATTAGATCAAGATGCCACATTTTTTAGATACTAA  
 TCGTGTGCGGTGATTTGATCTCAAGATTATCATCTGATGCATCTATAGTGCCAAATCGGTCA  
 CAAAAACGTCTCTGATGGAACAAGGGCAATTATTCAAGGGTTTTGTCGGTTTTGGCATGATG  
 AGCTTCCTCTCGTGGAATTTGACTTGCCTAATGATGATTTTAGCCCTCCTTTAGGTGCTAT  
 GGCATGATATATGGTAGGAAAATACGAAACCTATCAAGACAGTTACAAACCTCAGTAGGTG  
 GGTAAACAAAAGTGGCAGAAGAGCAATTAATGCTACTAGGACAATTCAAGCATATGGTGGT  
 GAAAAAACGAGGTTCCGCCGTATGCAAAAGAGGTTAGAAATGTATTTTCATATTGGTCTGAA  
 GGAAGCGGTTACTTCCGGTTTATCTTCCGGAAGTACTGGGCTAGTTGGCAACACTGCAATGC  
 TGTCGTTATTATTGGTTGGAACAAGCATGATTCAAAGTGGTTCATGACTGTCGGTGAATTA  
 TCTAGTTTCATGATGTATGCCGTGTATACCGGAAGTTCATTATTTGGTTTATCGAGCTTCTA  
 TTCAGAACTTATGAAAGGTGCTGGTGCAGGCTGCCAGGGTTTTTGAATTAATGACCGTAAGC  
 CATTGATTCGTCCGACTATTGGAAAGGATCCTGTGTCATTAGCCCAAAAACCCATCGTTTTT  
 AAAACGTGTCACTTATCCACTCGGCCAAACACCAGATTTTCAAGGATTTGAATAT  
 TACTATCAAGCCTGGTGAACACGTTTGCCTGTCGGTCCATCAGGAAGCGGCAATCAACAA  
 TTGCGTCTTTGTTGCTCAGGTACTACGATGTGAACTCAGGATCGATCGAATTTGGTGAATGAA  
 GACATCAGAAATTTCAACTTGAGGAAGTATCGAAGACTAATAGGATACGTGCAACAAGAACC  
 ACTACTTTTCAATGGGACTATCTGGACAATATCCTCTACTGCATTCCGCCTGAAATTCGGG  
 AGCAGGATGATCGTATTAGACGTGCTATTGGAAAAGCTAATTCACAAAAATTTTTGGCCAAT  
 TTTCCAGATGGATTGCAGACTATGGTTGGTGTAGAGGCGCGCAATTGTCCGGTGGTCAAAA  
 GCAAAGAATTGCATTAGCTAGAGCGTTTTTACTAGATCCTGCCGTCTTATTTTAGATGAAG  
 CAACCAGTGCCCTTGACTCTCAAAGTGAAGAAATAGTTGCCAAAAATCTTCAGAGACGTGTG

GAAAGGGGGTTCACTACTATATCAATTGCACATAGGCTTTCGACGATCAAACACAGTACTAG  
GGTGATTGTGTTAGGAAAACATGGCTCAGTGGTTGAAACCGGTTCAATCCGAGATCTAATCG  
CCATTCCTAATAGTGAACATAAATGCGCTGCTTGCCGAACAGCAGGACGAGGAAGGAAAAGG  
GGAGTGATAGATTTGGACAATAGTGTGCCCCGGGAAGTATAA

>YBR026C 1.67 Hot

ATGCTTCCCACATTCAAACGTTACATGTGTCCTCAGCTCATCAGATTCCCAAGCACTTCAA  
ATCGCTCATCTATTCAACTCATGAAGTTGAGGATTGTACCAAGGTTTTGTGTCAGTGAAAAATT  
ATACGCCTAAACAAGACTTATCTCAATCAATTGTGTTAAAAACTTTGGCCTTCCATAAAC  
CCTTCGGATATCAATCAGTTGCAAGGAGTATACCCGTCTCGTCCAGAAAAGACATACGATTA  
CTCCACAGATGAGCCAGCCGCTATCGCCGGTAATGAGGGTGTCTTTGAAGTTGTTTCTTTAC  
CTTCGGGAAGTTCCAAGGGAGATTTGAAATTGGGTGACCGAGTTATCCCATTCAGGCAAAT  
CAAGGGACTTGGTCCAATTATAGAGTTTTCTCTAGTAGTTCTGATTTAATCAAGGTAAATGA  
TTTGATCTGTTTTCTGCGGCAACTGTATCTGTTAATGGTTGTACCGGTTCCAATTAGTAT  
CAGACTATATCGACTGGAACAGTAACGGTAATGAATGGATTATCCAAAATGCCGGTACATCT  
AGTGTATCAAAAATAGTTACGCAAGTAGCAAAAAGCTAAAGGGATCAAAAATTAAGTGTAT  
ACGTGACCGTGATAATTTTTGATGAGGTAGCAAAAAGTTTTGGAGGATAAGTATGGTGCTACGA  
AGGTTATTTCCGAATCGCAAAAACAGCAAGACTTTTTGCCAAAGAAGTATTGTCCAAGATT  
TTGGGTGAAAATGCAAGGGTGGGCTTGCCCTTGAATTCTGTTGGAGGTAAATCCAGTGCATC  
AATAGCACGTAAGTTGGAAAATAATGCTTTGATGCTCACTTATGGAGGAATGTCAAAAACAC  
CTGTAACCTTTACCAACATCTCTACACATTTTCAAAGGCTTGACATCCAAAGGGTACTGGGTG  
ACTGAAAAGAACAACAAAAAACCCCAAGCAAGATTGACACCATCAGTGATTTTATCAAAAAT  
GTATAATTATGGTCACATTATTTACCAAGAGATGAAATTGAAACTCTTACCTGGAATACTA  
ACACTACTACTGACGAACAGTTACTAGAAGTGTCAAAAAGGTATAACTGGGAAGGGGAAG  
AAAAAATGGTTGTTTTAGAAATGGTAA

>YBR132C 1.72 Hot

ATGACAAAGGAACGTATGACCATCGACTACGAAAATGACGGTGATTTTGAGTACGATAAGAA  
TAAATACAAGACAATAACCACCTCGAATAAAGAGTATCGAACCTAGTGAGGGATGGTTGGAAC  
CTTCTGGGTGAGTGGGTACATAAACACGATACCCGAAGCGGGCGATGTTACGTTGGATGAA  
CATGAGGATAGAGGGTCTTCTATTGATGATGACTCAAGGACTTACCTGCTATATTTACAGAA  
AACTCGACGTAAACTAGAAAACAGGCACGTCCAGTTGATTGCTATTTCCGGTGTGATTGGTA  
CGGCGCTATTCGTGGCGATCGGAAAAGCTTTATACCGTGGAGGGCCCGCTCTTTATTATTG  
GCATTTGCTCTTTGGTGTGTTCCAATACTTTGCATTACTGTGTCTACAGCGGAAATGGTCTG  
CTTTTTCCCTGTAAGTTCCCCCTTTTTGAGATTAGCAACGAAGTGCCTTGACGATTCATTGG  
CTGTCATGGCTAGCTGGAATTTCTGGTTTCTTGAATGCGTACAGATCCCTTTTCGAGATTGTT  
TCTGTTAATAACAATTATACATTATTGGAGAGATGATTATTCAGCTGGTATTCGGCTCGCCGT  
TCAAGTAGTTTTGTATCTGCTTATTTCCATTTGTGCAGTCAAATATTACGGTGAATGGAAT  
TTTGTTGGCTTCTTTCAAATATCCTTGCACCTCGGCTATTTACATTCACGTTCAATTACC  
ATGTTGGGTGGAAATCCTGAACATGATCGTTACGGGTTTCGTAATTATGGTGAAGTCCATT  
CAAGAAATACTTTCCCGATGGCAATGATGTGGGAAGTCTTCGGGCTACTTCCAGGGGTTTC  
TCGCTTGCTTGATTCAGGCATCGTTTACCATAGCTGGTGGCGAGTATATTTCTATGTTAGCG  
GGAGAGGTCAAACGACCAAGAAAAGTATTACCCAAGGCGTTAAGCAGGTGTTTGTGAGATT  
AACATTTTTGTTTTAGGGAGTTGTCTGTGTGTTGGGATTGTTTGTTCGCCAAATGATCCTG  
ACTTGACAGCAGCAATTAATGAAGCAAGGCTTGGCGCCGGTCTTACCTTATGTCATTGCA  
ATGAATAATCTGAAAATTAGAATATTACCTGACATTGTTAATATAGCTTTGATTACAGCCGC  
CTTTCTGCTGGTAACGCTTACACTTATTGCTCATCCAGAACATTTTATGGTATGGCATTAG  
ATGGCTACGCGCCAAAATCTTCACTAGATGCAATAGGCATGGTGTGCCATTTACTCTGTG  
GCCATATCTTTGGTATGGGCTTTAGTGAGCCTTTTGCAACTGAATTCATAAGTGCAGGTCGT  
ATTGAATTGGTTAATTAACCTGATTACTGCCTCTCAATTGATTAATTTGTGTCCTTTGTA  
TCGTCATTTATTTTTCAGAAGGGCTTACCACGTCCAACAAGATTTCGTTACCCAAGTTGCCA  
TTCCGTTTCGTGGGGTCAACCATACACTGCTATTTATCGGCTTGTTCATGTTCCGCAATGAT  
TTTAATACAGGGCTACACCGTTTTCTTTCCCAAATTATGGAACACACAAGATTTTTTGT  
CGTATTTAATGGTGTTTATCAACATCGGTATATATGTGGGCTACAAATTTATTTGGAAACGT  
GGTAAAGATCACTTCAAAAACCCACATGAAATTGACTTTTCTAAAGAGCTAACAGAAATGA  
AAACCATGAGATTGAAAGCTCTTCGAAAATTTCAATATTTATAGCAAAGCATAA

>YBL015W 1.91 Hot

ATGACAATTTCTAATTTGTTAAAGCAGAGAGTTAGGTATGCTCCCTATCTGAAAAAGTTAA  
 GGAAGCTCACGAGCTTATTCCATTGTTCAAGAATGGTCAGTACCTTGGGTGGTCCGGTTTTA  
 CAGGAGTGGGTACTCCCAAGGCAGTGCCGGAGGCACTGATAGATCACGTGGAGAAGAACAAT  
 TTACAAGGGAAGTTGAGATTCAACCTTTTTGTTGGAGCTCTGCTGGTCCAGAGGAAAACCG  
 TTGGGCTGAACACGACATGATCATTAAGAGAGCCCCATCAAGTAGGGAAACCCATTGCAA  
 AGGCAATTAACCAGGGTAGAATTGAGTTCTTTGATAAACATCTGTCCATGTTCCCTCAGGAT  
 CTGACATACGGGTCTACACCAGGGAAAAGAAAAGACAACAAAATCCTTGATTATACTATAAT  
 CGAGGCAACGGCCATTAAGAGAGGACGGGTCTATCGTCCCAGGTCCCTCTGTCGGTGGTTCTC  
 CAGAATTCATTACAGTCAGTGATAAAGTGATTATTGAGGTTAACACGGCTACGCCTTCGTTC  
 GAGGGTATTACGATATAGACATGCCCGTGAACCCACCTTTCAGGAAACCATAACCCATATCT  
 GAAAGTGGACGACAAGTGTGGTGTGACTCCATCCCGGTTGATCCTGAAAAGGTTGTTGCGA  
 TTGTGGAGTCCACCATGAGGGACCAGGTCCCACCAATACGCCCTCTGACGACATGTCCAGG  
 GCTATTGCAGGTCAATTTGGTCGAGTTTTTTCAGAAACGAGGTAAAACATGGTAGGCTACCTGA  
 AAACCTGCTGCCTTTACAAAGTGGTATAGGTAACATTGCTAACGCTGTCAATGAAGGGCTTG  
 CTGGCGCCCAATCAAGCACTTGACTGTATGGACGGAAGTGCTGCAGGACTCGTTCTTGAT  
 CTTTTCGAGAACGGATCTTTGGACTACGCCACTGCTACTTCCGTGAGATTGACTGAAAAGGG  
 TTTTCGACAGAGCCTTTGCAAACCTGGGAAAATTTCAAACACAGATTGTGTTGAGATCTCAAG  
 TTGTCTCGAACAAATCCGGAAAATGATCCGTAGATTGGGTGTCATCGCCATGAATACCCAGTA  
 GAAGTTGACATTTACGCGCACGCCAATTCTACAAATGTGAATGGTTCCCGTATGTTGAACGG  
 GTTGGGTGGATCTGCTGATTTCTTGAGAAAATGCAAAGTTGTCCATCATGCATGCCCCCTCTG  
 CAAGACCAACTAAAGTAGACCCTACCGGTATCTCTACCATTGTTCCCTATGGCCTCTCATGTA  
 GATCAAACCTGAGCATGACCTGGACATCTTGGTCACTGACCAAGGTTTGGCGGATCTAAGAGG  
 TCTATCGCCTAAGGAAAGAGCCCGTGAAATCATCAACAAGTGTGCTCATCCCGATTATCAAG  
 CTTTGTGACCGATTACTTGGACAGAGCAGAGCATTACGCTAAAAAGCACAATTGCTTGCAAT  
 GAACCACACATGCTAAAGAATGCTTTCAAGTCCACACCAACTTAGCTGAAAAGGGTACAAT  
 GAAGTTCGACAGCTGGGAACCCAGTTGACTAG

>YMR245W 1.61 Hot

ATGGTCTGCTCTCTCTTAAAGTCGATGACCCTCTTCTCCTTGAAGTACTTGATCCAGCTATG  
 GCGCAATTTCTCCTCAAATTTTTTCAATTTTCCACCTTGCAGTGCAGACTTTATACTCTTGCTAT  
 TCTTGGGGTCCATTGCGTCCAAGATGTCTGCCCTTGTCCAAACACTGGAAGAATGCGTCCCTG  
 GACTCCCAGCACAACCTTTCTCTGTGAACGGGTATTAGGGGTTGTGATTCCTTTTTTGCCACC  
 ATCAAATGAAAATAAGCCCATCGCTATATTACTACTATTCTTTCTGTATATTCGTGTATCT  
 ATGTTCCCTGCGCAGCGCTACAATAGTACCCGTCTATGTATGTATGTATGTATGTATGTAGGC  
 GAATCTTCTCCCCATTCTACAAAGCAGCACCTACCACCGCAGCACCGTTTCACATGTCCGT  
 CTCTTTTGTTCAGCTCAGCTACAATCGTCAATCGCACTTTCTTCCGCGCGGGCGAGCCCGGT  
 TTTGTTGGATTTGCTCAGGTGCCAATATAACCATCAAGGAACGGACAGGGACCTGACAATACA  
 ATAGGCCATTTACATCACAATGCACAGGGACAGAAATTTATACACGATAACAATACCAACTA  
 A

>YBR105C 1.58 Hot

ATGATCAATAATCCTAAGGTAGACAGTGTAGCGGAGAAAACCCAAAGCTGTGACATCAAAGCA  
 GTCGGAGCAAGCGGCTTCGCCAGAACCAACACCAGCCCCCTGTTTCTAGAAATCAGTATC  
 CGATCACGTTCAACTTGACTTCAACCGCACCTTTTCATCTTCATGACCGTCATCGCTACTTA  
 CAAGAGCAAGATCTTTACAAGTGCCTTCTAGGGATTTCGTTGTCTTCCCTGCAGCAACTCGC  
 CCATACACCTAATGGGTTCGACAAGGAAGAAATATATTGTTGAGGACCAATCTCCCTATAGTT  
 CGGAAAATCCAGTCATTGTGACCTCTTCTATAACCATACGGTTTGCACAACTACTTAAGA  
 CCAAGAATGCAGTTTACAGGGTACCAGATATCAGGATACAAACGCTATCAGGTAACAGTTAA  
 CTTAAAGACTGTAGATTTGCCAAAGAAAGATTGCACGTGCTGTCCCTCATTTATCTGGAT  
 TTTTGTGATAAGAGGACTCACGAACCAACCCCGGAAATCAGTACATATTTTGAAGCCTAC  
 GCGGTAAACCACAAGGAATTAGGGTCTTGTCCCTCTAGCTGGAAGATGAACCTGTTTAAA  
 CGAATTCAAAGCCACAGACCAACAGACTTAGAACACTGGATAAATTTCCCTCCTTTAGAC  
 AGCTTTTCTGATGAGCCAAAAAACGGTCTCAACTCAACTGACGACAATGGCACTACAAAT  
 GCAGCCAAGAAGTTGCCCTCCACAGCAGCTTCTACTACACCAAGCGCAGACGCTGGTAACAT  
 ATCAAGAATTTTGTAGCCAAGAGAAAACAATTTGACAACACTTGAACGAACGGTTTATATTTA

TGAAATGGAAGGAAAAATTTTTGGTACCAGATGCCCTATTAATGGAAGGTGTAGACGGCGCA  
 TCTTATGATGGGTTTTATTACATTTGTCCATGATCAAGTTACCGGGAACATTC AAGGGTTTTA  
 CTATCATCAAGATGCTGAAAAGTTCCAACAGCTGGAATTAGTACCATCTTTGAAAAATAAG  
 TCGAGTCCAGTGATTGTTCTTTTGAGTTTGCTTGA

>YDL071C 1.52 Hot

ATGTTAGTACGAGACATAGCCGCCGAGGTTTATTTTCGCTCAATCTGTTTGTTCAGTTTTTC  
 CGCGTTCTCTCTTTTTTCGCTCTTTTCTGGCTACCGCGCCCGCCTTATATATAAAATCTCTTC  
 CGAATAACAAAGTGGCCGAAACAAGCGCCAACGTGACCATTTTTGCCACCGTGTCACTGTGC  
 ACGAGCAACGAAAACTGGCGTTGGTTGCGCCTCACGAATTGCTTGAGCCTCTTCCCAATAT  
 CATCGCGCATTTATTTGAGTCATTTCTCTGCGCTTTATTATTAAGGTCTGTGTGCTATCAA  
 AATGCTCTTGCTCCTGTTACCCCTCTATGCGTAAACACTTGCGCGTTTTCTCCCTTTCTCTTT  
 TAG

>YLR055C 2.13 Hot

ATGGACGAGGTTGACGATATTTCTAATTAACAACCAGGTGGTGGATGACGAGGAGGATGACGA  
 AGAGATGCTGAGTGGGCTGGAAAACGACTCAAAGCAGGACCTCGAGGGGAATGATGACGGTG  
 GTGAAGATGAAGAGGATGACGATGATGATGATGAGGACGATGATGATGACGAGGACGAACGA  
 GAGGACGACGATGAACAGGAGGACGACGATGGTGAGGACGACGCCGCAAGAATGGATAAGAC  
 TGCTACACCGACGAATGAGCACCAGCATGATGAGCAAAAAGGCTGCTGCTGCTGGTGTGGCG  
 GTGCAGGCGATAGTGGCGATGCTGTTACTAAGATTGGATCCGAGGATGTGAAATTGAGCGAT  
 GTTGATGGAGGAGTGGGGTCCAGGGAAGCATCTTCTCTACACACGAAGCCTCTGCTAATGG  
 AGAGGTTTTATGAGTACTATAAGCACATGTTGAATGCCGCACAGATTGCGGATTCGTACAATA  
 TCTACCCACGCGCAGCCATAACCCATCCAGACGACGTCATGCGTTGGCCGTGTCCAGGGGT  
 CTCAAGTACCTGTTTTTGGGCGGTAGCGATGGATACATAAGGAAGTACGACTTGCTGAACAC  
 GCTTGAGGGGAAACTTTTCTTAACCTATCCTGCAGAAGCATTCGTTGGCTGAGTCTATTTCAGA  
 ACGCGGGTATCTTGCAGTCTGACTGGGAAAATGAGATCCCGCAGAAAAAATCAGAAATGAAA  
 CTCTCCGCTAATAAGACAGATTACGAGCCCAAAGTTAGCCCGTTTATTCTTTGGAAGTCCA  
 AAGCGAATGCCTCTTTATACTGAGCGGGCTACAGAATGGTGGGATTACCATGCAGGGCGTTC  
 GCTACATGGAGGGGAGCATTGCGCACTATTTTAAGGGCAGGAATGGACATACCCAAATCGTT  
 AACATACTGAGATTAACCGGTCAAGAGGACAGGTTTTTTGAGTGGTTCCTGGGATAAGCGTCT  
 TTTGGAATGGGATTTGCAGACGGGTGACATAGTTAATGAGTTTAAAAAATCAAGGTCTGAAT  
 TGTCTCTTTGGAATGCGGCCGCTGTACTCGTCCGTGGATGTGTCCGGTAACGTCAACAGT  
 GGTAAAGAGAATGAAAATGCAGATGACGATATGGATTCTCTGTTTGGTGATGAAGACGAAGA  
 CGAAAAGCAAGATGCTGGCAACGAACCCGTCGAGACGGGGGATGGTTCTAATGGTGAAGAGA  
 ACAAGAACAGATATCTGAAGAATCTTTGAACATAGTCTATGATGAATCCGTTTTTTATGACC  
 TCAGGGTTGAACGTTCCGTGCATATTTGGGACCGACGCATGACGCAGTCGCCAGCATTTGTC  
 TCTGGAGAGAGGTGCAGGCGTCCCACCGTGGTGTGTTGTCGCATGTTGGGGTGTAGATGGTG  
 ATCATGTGTATGCAGGGAGAAGGAATGCCTGTGTGGAGCAGTTTGACTTGAAGATGCCCTCG  
 AAACCTATCCATAATTTGAAACTGCCTTCTATTTTACGGCCCTGTCTCTTGTGTTAAAGCCAT  
 GCCTAATAACAAGCATTACTATGTGCATCGCGGGATAAATATCAGATTGTACAACGTTGAAA  
 TTGCAGTAGATGCTTCGAATTCGACTACAAAGAGTTCTAAAGTGCCGTTCCCTCATCGTGCCG  
 GGCCATCACGGTGGTATTATATCAAACCTTATACCTCGACCCACTTCAAGATTTATAATAAG  
 CACAAGTGGCAACAGAGGCTGGCAGGGGAATTTCTACGGACACGACCCTTATTTACGATATAG  
 ACTTAGAATAG

>YCR063W 1.61 Hot

ATGCCGCGCATAAAGACCAGAAGATCCAAGCCTGCACCTGACGGGTTTCGAAAAAATCAAGCC  
 AACCTCACAGATTTTCGAAATCCAACCTCAGAGATGCCCAAAGGACAAGTCGTCTAAGCTCG  
 CAGCAAAGTCCAATGAGCAGCTCTGGGAGATAATGCAACTCCACCACCAGCGCTCTAGATAC  
 ATATATACTCTGTACTACAAGAGAAAGGCCATCTCCAAAGACCTTTACGATTGGTTGATAAA  
 GGAAAAGTATGCTGATAAATTGCTAATTGCCAAATGGCGCAAACCGGGTATGAAAACTGT  
 GCTGTCTGCGCTGCATTCAAAAGAAGGAACTAACAAACGGTAGCACTTGCATCTGCAGGGTG  
 CCTCGTGCACAGTTAGAGGAAGAAGCACGCAAAAAGGGCACACAGGTGTCCTTCCATCAGTG  
 CGTCCACTGCGGCTGCCGTGGATGTGCAAGCACAGACTAA

>YDL144C 1.86 Hot

ATGTCCTAGAATACTAGTTATCGGGGCAGGTGGCGTTGGGGTCATTACTGCGCTTTCGTTGTG  
 GCTTAAGAAGGAGAGCGACGTTTCCTTGGTAGTCAGATCTGACTACGATAGGGTATTGAAGC  
 ATGGCTACACAATCGAATCATGTGACTATGGCCGGTTAGAAGGTTGGAGACCCACCATATT  
 TACAGCAGCGTCGAGGACGCTGCTTCTGCCGCAGACAACCAAGGATACAACCTATATTGTAGT  
 GACTACCAAGAACATCATAGATGGGCCCGTTAATTC AAGGGTGTCCAACATCATCAGACCTG  
 TGCTTGAGAAGAATAAAGAGCTACATGGGCCGCAATTGACGACACACATTTTACTGGTACAG  
 AACGGAATCGATATTGAGAAGGAGATATGGGCCGGAATTTCCAGAGAGCAGTATCGTTACAC  
 GGTGCTTCTGGCATCCAGTTAATCGGATCCACTAAGATCGGGTCAGGCCATATCAGTCAAG  
 TGGGCCAGGACCCTTATCGTGTGGAGCTTTTGATCCACAGGACGCTGCTGCTATCCAGGCT  
 GCCAACGACTTCGTCAGGATGTACAGCAACGAGGGGCAAACTTTGTGCAATTTGACCCTAG  
 GGTCCGTTACTCTCGGTGGAAGAAGTTGCTCTACAATGCAGCTATCAACACATCCACGGCAC  
 TTGTGGGGCTAGACGTTCCGCGTTGCCTGGAGTTTGGGGTTAACAAGAAGAGCACAGAAATT  
 GAAGTGTTCACCCCTGCCATGAGGGAGATCATCGCCATTGCGGCGAGTGAAGGCATCATTTAT  
 CGAAGAGGAGTTCATAACGATGTTTACAGAGATTACCAGGAAAAGGTGTTCAAGCCATCCA  
 TGTGCGTGGACTGCGAGAAGGGCCAATTGATGGAGCTAGAAGTCATCCTAGGCAACCCCAT  
 AGAATCGCGAAAAGAAACGGCGTCGCTACACCCTCTTTCTATCTTATAACCTACTTGT  
 GCTAGTACAGGCCAACTAAAGGAGCGGAAAGGCCTATTGAAGTTCGACGAAAAAACTGCCA  
 CTCTTGTGGACGAGTAG

>YBL064C 1.54 Hot

ATGTTTAGTAGAATTTGTAGCGCTCAATTAAGAGGACGGCATGGACCCTTCCTAAGCAGGC  
 TCACTTGCAATCACAGACGATTA AAAACATTTGCCACAGCACCTATTCTGTGCAAACAATTCA  
 AACAAAGTGATCAACCAAGACTAAGAATAAACTCTGATGCTCCTAACTTTGATGCTGACACA  
 ACGGTTGGTAAAAATCAATTTTTTACGACTACTTGGGCGACTCTTGGGGGGTCTTGTTTTCTCA  
 CCCAGCAGATTTACCCCTGTCTGCACCACCGAAGTCAGCGCATTTCGCCAAATTGAAGCCGG  
 AATTCGACAAGAGAAATGTTAAATTTGATCGGGCTTTCAGTGGAAGATGTTGAGTCCCACGAA  
 AAATGGATTCAAGACATCAAGGAAATAGCAAAGGTTAAAAATGTTGGTTTCCCAATAATTGG  
 TGACACTTTTTAGAAACGTGGCATTCCTATATGATATGGTAGATGCCGAAGGATTCAAAAATA  
 TCAATGATGGGTCCTGAAGACCGTGAGGTCTGTTTTTCGTCATCGATCCCAAGAAGAAGATT  
 AGACTGATTTTTTACCTACCCTTCCACCGTCGGAAGAAACACTTCTGAAGTGTAAAGGGTAAT  
 CGACGCCTTGCAATTGACTGACAAGGAGGGCGTAGTAACTCCAATTAATTGGCAGCCAGCTG  
 ACGATGTCATTATTCCTCCCTCTGTCTCCAATGATGAGGCGAAGGCTAAATTTGGTCAATTT  
 AATGAAATTAACCCCTATTTAAGATTCACCAAGTCGAAATAA

>YER153C 1.96 Hot

ATGTTGACTATCACGAAAAGACTGGTGACCACCGATGTGCGGTCGCGAATACTGTTAAGCAG  
 TTTAAACGGGAAAATGTCCGATGCACTGGCGCTGCTGCGTCAGCAGCAGCAGACCAGCGTGG  
 ATGTGGAGCTGCTGCACACGATGCTAGCGCGAGCCGCTGCGCTTGCCCATGCCGACACTATA  
 GCATACATGTGGTATCAGCATGTGATGCCACGCCGTTGCCAGTAGAGGGCCGCTGCTATG  
 TGAAATGGCTGGCGTAGCATTGTACCAGGACAGGCTCTTCTTACCCGCGCAGTTCTCTCCAGC  
 ACTACCAGGCGATGAATCGCGATCGTGCACCAGCCAGAAGATGAACTGATTGAGTATGAG  
 CTTAGACGGATTAAAGTCGAAGCGTTTGGCGTGGCACAATGCACTCCACGGCGCTCAGGGA  
 AAAGTGGAAAGGTATTCTTGCAGGAGATGGATACGCTACCAGGCGAGCCGCCATTAAGGCTGC  
 GCGACTTCCCGCAAATGACCAAGGCTATGGGCATAGCATTGATGCAGCAAGATGAGCAAGCA  
 GCTGCCCTGGCGTTGTTTGGACGACAGCCCCCTAGTGATAAAGAACGAATGGTCACTACCCT  
 ACTACTGGCTGGTGTCTTTGGCATGTTCCCGGCCAGCGCAGGCGGACGTGTGCTGGCGG  
 AGTTCCGTCAAAGTTATCGCGGGCTGCCGCTGCTGGATGCCGAACTAGTGATAAAGAGAAGA  
 GGATTTGAAATCAACACATAA

>YGL037C 2.01 Hot

ATGAAGACTTTAATTGTTGTTGATATGCAAAATGATTTTTATTTACCTTTAGGTTCCCTGAC  
 TGTTCAAAAGGTGAGGAATTAATCAATCCTATCTCGGATTTGATGCAAGATGCTGATAGAG  
 ACTGGCACAGGATTTGTGGTCAACAGAGATTGGCACCCCTTCCAGACATATTTTCGTTCCGAAAG  
 AACCATAAAGATAAAGAACCCTATTCAACATACACCTACCCTCTCCAAGGCCAGGCGATGA  
 TTCCACGCAAGAGGGTATTTTGTGGCCCGTACACTGTGTGAAAAACACCTGGGGTAGTCAAT  
 TGGTTGACCAATAATGGACCAAGTGGTCACTAAGCATATTAAGATTGTGACAAAGGGTTTC  
 TTGACTGACCGTGAATACTACTCCGCCTTCCACGACATCTGGAACCTCCATAAGACCGACAT

GAACAAGTACTTAGAAAAGCATCATACAGACGAGGTTTACATTGTCGGTGTAGCTTTGGAGT  
 ATTGTGTCAAAGCCACCGCCATTTCCGCTGCAGAACTAGGTTATAAGACCACTGTCTGTG  
 GATTACACAAGACCCATCAGCGATGATCCCGAAGTCATCAATAAGGTTAAGGAAGAGTTGAA  
 GGCCACAACATCAATGTCGTGGATAAATAA

>YHL032C 1.67 Hot

ATGTTTCCCTCTCTCTTCCGACTTGTAGTATTCTCCAAACGTTACATATTCGGATCAAGCCA  
 GCGCCTTTACTAGTTTAAAAACAAGAACAGAGCCGTATGTCCAAAATAATGGAAGATTTAC  
 GAAGTGACTACGTCCTCGCTTATCGCCAGTATTGATGTAGGAACGACCTCATCCAGATGCATT  
 CTGTTCAACAGATGGGGCCAGGACGTTTCAAAACACCAAATTTGAATATTTCACTTCAGCATC  
 GAAGGGCAAGATTGGGGTGTCTGGCCTAAGGAGACCCTCTACAGCCCCAGCTCGTGAAACAC  
 CAAACGCCGGTGACATCAAAACAGCGGAAAAGCCCATCTTTTCTGCAGAAGGCTATGCCATT  
 CAAGAAACCAAATTCCTAAAAATCGAGGAATTGGACTTGGACTTCCATAACGAACCCACGTT  
 GAAGTTCCCAAACCGGGTTGGGTTGAGTGCCATCCGCAGAAATTAAGTGTGAACGTCGTCC  
 AATGCCTTGCCCTCAAGTTTGTCTCTCTGCAGACTATCAACAGCGAACGTGTAGCAAACGGT  
 CTCCACCTTACAAGGTAATATGCATGGGTATAGCAAACATGAGAGAAAACCACAATTTCTGTG  
 GTCCCGCCGCACAGGAAAACCAATTGTTAACTACGGTATTGTTTGGAAACGACACCAGAACGA  
 TCAAAATCGTTAGAGACAAATGGCAAAACACTAGCGTCGATAGGCAACTGCAGCTTAGACAG  
 AAGACTGGATTGCCATTGCTCTCCACGTATTTCTCCTGTTCCAAGCTGCGCTGGTTCCTCGA  
 CAATGAGCCTCTGTGTACCAAGGCGTATGAGGAGAACGACCTGATGTTCCGGCACTGTGGACA  
 CATGGCTGATTTACCAATTAACATAAACAAGGCGTTTCGTTTCTGACGTAACCAACGCTTCC  
 AGAACTGGATTTATGAACCTCTCCACTTTAAAGTACGACAACGAGTTGCTGGAATTTTGGGG  
 TATTGACAAGAACCCTGATTCACATGCCCGAAAATTGTGTCTCATCTCAATACTACGGTGACT  
 TTGGCATTCCCTGATTGGATAATGGAAAAGCTACACGATTCGCCAAAAACAGTACTGCGAGAT  
 CTAGTCAAGAGAAACCTGCCCATACAGGGCTGTCTGGGCGACCAAAGCGCATCCATGGTGGG  
 GCAACTCGCTTACAAACCCGGTGTGCAAAATGTACTTATGGTACCGGTTGCTTTTTTACTGT  
 ACAATACGGGGACCAAAAAATTGATCTCCCAACATGGCGCACTGACGACTCTAGCATTTTGG  
 TTCCACATTTGCAAGAGTACGGTGGCCAAAACAGAAATGAGCAAGCCACATTTTGCATT  
 AGAGGGTTCCGTCGCTGTGGCTGGTGTGTTCCAATGGCTACGTGATAATTTACGATTGA  
 TCGATAAATCAGAGGATGTCGGACCGATTGCATCTACGGTTCCCTGATTCTGGTGGCGTAGTT  
 TTCGTCCCCGCATTTAGTGGCCTATTTCGCTCCCTATTGGGACCCAGATGCCAGAGCCACCAT  
 AATGGGGATGTCTCAATTCACTACTGCCTCCACATCGCCAGAGCTGCCGTGGAAGGTGTTT  
 GCTTTCAAGCCAGGGCTATCTTGAAGGCAATGAGTTCTGACGCGTTTGGTGAAGGTTCCAAA  
 GACAGGGACTTTTTAGAGGAAATTTCCGACGTCACATATGAAAAGTCGCCCTGTCCGGTTCT  
 GGCAGTGGATGGCGGGATGTCGAGGTCTAATGAAGTCATGCAAATTCAGCCGATATCTTAG  
 GTCCCTGTGTCAAAGTCAGAAGGTCTCCGACAGCGGAATGTACCGCATTGGGGGCAGCCATT  
 GCAGCCAATATGGCTTTCAAGGATGTGAACGAGCGCCATTATGGAAGGACCTACACGATGT  
 TAAGAAATGGGTCTTTTTACAATGGAATGGAGAAAACGAACAAATATCACCAGAGGCTCATC  
 CAAACCTTAAGATATTCAGAAGTGAATCCGACGATGCTGAAAGGAGAAAGCATTGGAAGTAT  
 TGGGAAGTTGCCGTGGAAGATCCAAAGGTTGGCTGAAGGACATAGAAGGTGAACACGAACA  
 GGTCTAGAAAACCTCCAATAA

>YOR230W 1.77 Hot

ATGCCAAAAAAGGTTTGGAAATCATCTACGCCTTCCACTTATGAACATATCTCCAGCTTAAG  
 ACCAAAATTTGTGTCTCGTGTGGACAATGTCTGCACCAAAGGAAGTCTTTCAGCTTCAGCA  
 ACGTTGTTGTTCCAGATAAAAAAATAACACTCTAACCTCAAGTGTTATACTCTCAAGGT  
 AGTGATATCTACGAAATTGACTTCGCTGTACCACTACAAGAAGCCGCTTCAGAACCGGTGAA  
 AGACTATGGTGACGCCCTTTGAAGGTATTGAAAACACCTCGTTGAGCCCAAATTCGTGTACC  
 AGGGTGAAACTGTCTCCAAAATGGCCTACTTAGATAAGACTGGAGAAACTACATTATTGTGCG  
 ATGTCTAAGAACGGGTCGTTGGCTTGGTTCAAAGAGGGTATAAAGGTCCCTATTACATTGT  
 ACAGGAATTGATGGGTCCAGCAACCAGCTATGCCAGCATCCATTCTTTAACCAGACCTGGTG  
 ATCTACCTGAAAAGGATTTCTCATTAGCCATCTCTGACTTCGGCATTTCCAATGATACCGAA  
 ACCATTGTGAAGTCTCAGAGTAATGGTGTGATGAAGAAGACAGTATTTTGAATAATCATTGACAA  
 TGCCGGTAAGCCTGGTGGAGATTCTACGTACTGTTTCATGTGCCTGGTACCCTGTGACTCACA  
 CCGTAAGATTTTTTCGACAATCATATCTTTGCGTCTTGTTCAGATGACAATATTCTGAGGTTT  
 TGGGACACTAGAATTTCCGACAAGCCTATATGGGTGTTGGGAGAACCAAAGAACGGAAAATT  
 GACCTCGTTTGTATGCTCTCAGGTTTCCAACAACCTGTTTGTACCGGTTTCAGTACGGGTA

TTATCAAGTTATGGGATGCCAGAGCGGCTGAAGCTGCCACCACTGATTTGACTTATAGACAA  
AACGGTGAAGATCCAATTCAGAATGAAATCGCTAACTTCTATCATGCCGGCGGTGATTCTGT  
TGTCGACGTCCAATTTTCTGCCACTTCAAGCTCTGAATCTTTACTGTGGGCGGCACTGGTA  
ATATTTACCACTGGAACACTGACTATTCTTGTCAAAGTACAATCCTGACGATACCATTGCT  
CCTCCTCAAGATGCCACTGAAGAATCACAAACAAAATCTCTGAGATTCTTGACACAAGGGTGG  
AAGCAGAAGATCTCCAAAACAGATTGGAAGAAGAAACACCGCCGCTTGGCATCCAGTTATTG  
AAAACCTGGTTGGTACTGTGATGACGATAGTTTAGTCAGCATCTACAAGCCCTATACCGAG  
GAAAGCGAATAG

>YJL135W 1.51 Hot

ATGTTCAACCAGCTATTGTTGGAACCAAATATGTGCAAAATATCGCCAGATATTCATTTAC  
GAATAACAAGGCAAAAATGTTGCAAAAATGTTTCTTAGTACCAAATTTGAACTACTGCCTTT  
ATCATGTGACTGAACTACGCTTGGCTGTTTTGTTTTTCCCTCACCTTGGCGTAAAGTTGTCG  
TCACATTATAAGGGCAGTAAGAAAAGCAGAGTTTAAAGAAAGTTTGTTTACATAACAACATC  
ACGTAGAGGAAATCTTCAAACCTACCAGACCAGCGGACACAAGCCATTTGTATAGATAAAA  
AATGGTAG

>YPL250C 1.96 Hot

ATGTCCTCTGTGGAATCTTCCCCATCTCGCGCTATGAAGACGAGGTCTTCCCTCTTTCGTT  
TTCAAACGTTGCTTTCGAGCCCCCTATGCTCTCGCATAGCCCGGACAGATCGACTTATGCCG  
ATGACTTTTTCTCAATCTTACCAGCAAGAATTGCTAACTTTTCCGCTATCGTACCCGATTGTC  
GATGAGTCAGAAATGCACGCACACTAAAGATAAGACGGACAGCAACATAATAACGAGTACTGA  
AGACGATTGCATGTTTCGATATGGAATTTAACGGCAACGCCGCCAGTGCAGTTGCTGCTGCTA  
GTAAGGAATCTAACTCTGCCTCTGGGTTTGCCTTTGCAAGTAACGATGCCCTTGGCAATGTC  
GCACAACAGAACTACAGACTGTGGTTGTCAATCGGTATGA

>YLR257W 1.72 Hot

ATGGTTGACGCTAGGGGTAGTACGCCATGTTAATTGGTGATTCTATAAGAAACGTTAATGA  
TGGAATAGTCTGGATTTCCAGTATACTAATCAGTTTAAATGAGGAAAGTGAGGCTTCGAGGT  
TACTAACGCCACAAACGAGTTCCAATCACGCCCTAAGCAAGATGCAGAAGGATGATGATATT  
CGAGATAGATCTTATACATCTGTAGCGGAATTGAATCGTGAGGGTGCTTTGCTGACCCGACGA  
AGTTGATTTGGAGAATGTTGATGCTTCGAAAGTTCGCAGCAATAGAGACGACCTAGAGGCAG  
AGGAGAAAAGGAAAAAACTACTCTTGTGAAAAAAAAGCAAAGAAATAAATCCATCAACTCG  
GAAAGTTTTTCTCTCTCTCTGCGTGCTTCCAAATCTAATTCAGTATTACATCAACTGA  
TCTGTGCAAGATCACATCAGTAAGTACTCTTTCATCAGGCACCCCTGAAAATATTACAGGTG  
AGGCAGACGACGAAGACGAAGACATAATCAGAACTCTTACGGGCAAATGATCAAAAACAAT  
TCCAACAGGCCACATTTGGCGAAGGGTGAATCGTACCAGTCCGCAGAACAGGAAATAGATCA  
TACGGCGCCTGAAAAATCAGAGAAAAGACAAGAAAGAAGCGGTAGATCCTTTGATAGACAAA  
AATCTTCGGCTGAGTTTCTAAGATCCTTATCGAGGTCAATAAGTCGTGGACCCACAAAGAAC  
AAAACGGTTTTCGCCCTCTAAGGGAGAAGACTCTAGAATGTATAGTACCAGCAACTACTCTAT  
ATCATTAGTTGATTTGGAGAACGGACCCAAAATTTATCCCGAAACTTTAGAAGAAGAGCAGG  
AGGACGCCGAAAAGGAGGGTGTTTTGATGGAAGACGAGGGTAATGAAGAATACACCAAAGAT  
TTGGAAGAAGCAGCTAACAAAGCTCAACCACAGTAG

>YBR261C 1.55 Hot

ATGGACGTGCCTGCAGATTCCCATATCAAATACGAAGATGCCATCGACTATTGGACGGATGT  
GGACGCCACTGTGGATGGTGTCTAGGTGGATACGGAGAAGGTACAGTAGTACCCACAATGG  
ATGTCTGGGATCCAATAACTTCCTGCGTAACTGAAGTCGAGGATGCTGCCTCAGGAGAAC  
AACGTGAAGTACGTGTAGACATTTGGTGCGGGGATTGGACGTGTAAGCAAGACCATGCTTCA  
CAAGCACGCCGCTAAGATAGACCTTGTAGAACCGGTAAAGCCTTTTATCGAGCAAATGCACG  
TTGAATTTGGCTGAGCTGAAAGACAAAGGCCAAATTTGGACAAATATATGAAGTAGGGATGCAG  
GACTGGACCCCGATGCCGGCAAGTACTGGCTGATCTGGTGCCAATGGTGCGTGGGACACCT  
GCCAGATGCAGAACTCGTCGATTCCTGAAAAGATGTATTGTTGGTTTGAACCTAATGGGA  
CAATCGTGGTCAAAGAAAATAACACACCTACAGATACCGATGATTTTCGACGAAACGGATTCT  
TCGGTCACAAGGTACAGATGCTAAGTTTCAGGCAAATCTTTCGAAGAAGCTGGCCTAAAGCTCAT  
CGCCAGTGAAGACAACGTGGCTTACCAAGAGAATTGTACCCAGTGAGGATGTACGCACTCA  
AGCCCATGCCAAACTAG

>YBR240C 2.27 Hot

ATGGTCAATAGTAAGAGGCAGCAGAGAAGCAAGAAAGTAGCGTCATCCTCCAAAGTGCCCC  
 CACCAAGGGGAGGACATTTACTGGGTGCTGGGCATGCAGATTCAGAAACGCAGATGCGACG  
 AGAATAGACCAATCTGTTCACTGTGTGCCAAACATGGAGATAATTGTAGTTACGATATCAGA  
 CTTATGTGGTTAGAGGAGAACATCTACAAAGTACGCAAGCATTCACTGATCAGTTTATTACA  
 GGCTCGCAAATCGAAATCGAAACCATTGTGCCAGAAAATCTCAAATCAAGGTTTAAACAAA  
 TGACCCATTTTAGACAACACTATCACCCCGACAAGTACTGCGAAGACAGCGTGCACGAGGCA  
 AGTAAGGAAACTACGCTTCCTAACGATAATACATTCACCATAAGCGTACGGAGATTGAAGAT  
 ATACAATAACGCTGTGGCCTCTGTCTTTGGTAGCATGACAAATAGAGATTATACTCAAAGC  
 GCATAGACAAGAAGTTGGACGAATTGCTTAATATGGTGGAAAACGACATATCTGTGGTCAAC  
 CTCAATTGCTCCAAACACGGGCCTTACTCAGTTTTTCAGGGCCAATCCGGCTGCAGTTACCTC  
 TGCTCTTACAGATCAGCTGCCGTCGCCGGGTCATTCGATGTCGTCAGCAGAGGAAACCTA  
 CTGCAGCGCTGTCATCGCCGCCAGAAGACAGCACCTCTTTGATCGATATTATCCAAGGCAA  
 ATTTTCGGGATCCTATGGTTTAAATTGCTACGGGAACATGATATTGAACCGACAAGAATACAC  
 GACGTGGTTTCATCAATAAGATGAGGAACTCGTTGACCACGGAATTCATACGCTTCCTGGGA  
 AAATAATTGACGACCCGGACATCAATATGGCCTCGTGCTTCAAAGAGTGCATCGCTCGT  
 TGGAGTTGTGTCGATTGGCAATCCATAGCTATAACAATGCTGGTCATCATTCATGGATATAC  
 CTGCCCAACTTGACAAAGCTTCTAAGAGTGTGGTTTCTCCAGCAAAAGCTATTGAGATTTT  
 CGATGTATCCGCTGGTCAACTTTATCATAAAACAATACACAAGATTTAGACGTCCTGTACCAT  
 TGTAATGGATTGCTAGGGAATGCCGACTTATTCGAGGATCCCTACCAGGACGAGCTTACGTC  
 GGAGTTACATGTCTTGGTCACGGAGCGCCTAGTGAATAGTTGGAAAGATACAATATTGCAAC  
 AACTTTGCTCATGTCAAGATACCACACTTTTCATGTTCCCAACTGCGGTACTGGCAGCTACAA  
 CTGAAGTGTAATCAACAATTTTACAAGGATGTATATGCCATGCAGGACTAG

>YIL011W 1.52 Hot

ATGCTTTTCACTAAAATCGCTGCCTTATTAGCTGTTGCCGCTGCCTCCACTCAATTGGTTTC  
 TGCTGAAGTTGGACAATATGAAATCGTCGAATTTGACGCTATTTTGGCTGATGTCAAGCCA  
 ATTTGGAACAATATATGTCCTTGGCAATGAATAATCCAGACTTTTACCCTACCATCTGGTGTT  
 TTGGATGTTTACCAACATATGACCCTGCTACTGATGATTCCTACACCAGTTATTTACCGA  
 AATGGACTTTGCTCAAATCACCCTGCCATGGTTCAAGTGCCTTGGTACTCTTCTAGACTGG  
 AACCTGAAATCATCGCTGCTTTACAAAGCGCGGGTATCAGTATTACCTCCTTAGGTCAAACC  
 GTTCCGAATCTGGTTCCGAATCTGCCACTGCTTCCTCAGACGCTTCTTCTGCTTCTGAATC  
 CTCTTCCAGCTGCTTCTTCTTCTGCTTCTGAATCCTCCTCAGCTGCCTCCTTCTGCTTCTG  
 AATCCTCCTCAGCTGCTTCTTCTTCTGCTTCTCAGAATCTTCTTCTGCTGCCTCCTTCTGCT  
 TCTGAAGCTGCTAAGTCTTCTAGCTCTGCCAAGTCTTCTGGCTCTTCTGCTGCTTTCATCTGC  
 TGCTTTCATCTGCTTCTTCCAAGCCTCTTCTGCAGCTTCTTCTTCTGCAAAGGCCTCCTCTT  
 CTGCAGAAAAATCTACTAATAGCTCCTCCTCTGCTACCTCCAAGAACGCTGGTGCAGCTATG  
 GACATGGGCTTCTTCTCCGCTGGTGTGGTGGCGCTATTGCCGGTGCCGCTGCTATGCTCTT  
 ATGA

>YJL152W 2 Hot

ATGCCGATTTAGCCCGCGAAGCGCATACTTGGCCTCCGCATATTTACATTCAACACTTTC  
 GATCCGCATCCAACCCCGGAACACCGGCACGTATTTCAAAAAAGGACGTGAAGAACAAAA  
 GGAACGAAGAAAAAGGCAATAATTTACTCTATGTGTTATTTAGAAGTACGGTGATAAAGAGC  
 TCGTTCCGATCCTAAGTACGGCCGGAAGAGAGCTGTTGTTGTTGTCCATCAAGGGCACAT  
 CGGCACCGCCTCATCGTCTTCATCATATGCTGGAGGCTGTGCTTGAGATTCCTCTGCAGGG  
 TGAGCTTCCAGGTCACGGTCTACGGCGGGCGCAGTCGCATGTCTGCGTGA

>YCL035C 1.7 Hot

ATGGTATCTCAAGAACTATCAAGCACGTCAAGGACCTTATTGCAGAAAACGAGATCTTCGT  
 CGCATCCAAAACGTACTGTCCATACTGCCATGCAGCCCTAAACACGCTTTTTGAAAAGTTAA  
 AGGTTCCCAGGTCCAAAGTTCTGGTTTTGCAATTGAATGACATGAAGGAAGGCGCAGACATT  
 CAGGCTGCGTTATATGAGATTAATGGCCAAAGAACCGTGCCAAACATCTATATTAATGGTAA  
 ACATATTGGAGGCAACGACGACTTGCAGGAATTGAGGGAGACTGGTGAATTGGAGGAATTGT  
 TAGAACCTATTCTTGCAAATTA



>YOL060C 1.67 Hot

ATGTCGTTTTTGGCCACTAAGGTCTAGGTCACGATCAGGCGTCCTCATTGGGTATAACATCAT  
 CTTATATCACATCTTTACGATACCGAAGATATATTCCTACTGCCGTTGTTATCCGGATCACACG  
 TACTCAATTCTAGGGATGTTGCCGATTCCGGCCATAGCGTAGGTGATGAGGCAAGCGTTACC  
 ACGTACTATATTATCTCTATCATCCTAGTGCTGCTGGGTGGTGTATTTGCAGGATTGACGCT  
 GGGGTTGATGGGTCAAGATGAAGTCTACCTGAAGGTAATCAGCACTTCAGGCTCGAATTCTG  
 AAAAGAACTGGCCAAGCGGGTGCTTGACCTAATATCTAGGGGGAAGCATGGGTTCTAGTC  
 ACCTGCTGCTTCTAATGTTATAACCAACGAAACATTGCCATTGTTTTGGACAGGTGTCT  
 TGGGGTGGTTGGCAGGCTGTAGTGTGCTCAACTATTCTAATTGTGATCTTCGGTGAAAATTA  
 TTCCGCAGAGTGTCTGTGTTAAATACGGGCTGCAAGTTGGGGCATTCTTCTGCCCTTTGTT  
 CTTGTACTGATGTATCTGATGTACCCAGTCGCATATCCGATCGCGACTCTCCTGGACTATAT  
 GCTGGGTGAAGATCATGGTACGATGTACAAAAAATCCGGCTTAAAGACTTTGGTACCTTGC  
 ATAGGACCATGGGGTGGAAACGGTTGACTAAAGACGAAGTTACAATCATCTCTGCTGTTTTG  
 GATCTAAAGGCAAAGAGGGTTGAGGAAATCATGACTCCGATTGAAAACGTGTTCACAATGAG  
 TGCCGATACCATCCTAGACGATAAACTGTGAAAAAATCTTCAACTCAGGGTTTTCTAGAA  
 TCCCGATTTTTTTGCCCAATGAACCAACAACCTTCATCGGCATGTTACTTGTGAGGGTGCTT  
 ATCTCCTACGATCCTGATGACTGCCTCCCAATCTCCCACTTCCCCCTAGCCACGTTGCCAGA  
 AACTTCCCCGAACACATCTTGTGTTGAATATTTCTGAATTACTTCCAGGAGGGGAAAGCTCACA  
 TGTGCGTCTGTTAGTAAAGAGCCGGGCTCCTCGCATGGCGCTATTGGTGTTTTAACTTTGGAG  
 GATGTCATTGAAGAATTGATCGGTGAAGAAATCGTGGACGAGTCTGATGTCTTTGTGGACAT  
 GCATCAGCATATTATGAGACAACAACCGGGGCCCTTGAGCAAAGGCACATTACTTCCCTATT  
 TGCATCATTTGTACACTAGCTCTCACAAGGAGCACAAAGCTGCTGACCAAGCTGATGAATCG  
 TCTCCACTCTTGTCTCCATCCAATTCTAATCACCCATCCGAGCACCCACAGCAAGATTTGAA  
 TAATAAGTCTTGGAAAGCAGAAGTCAAATGATGGTTACGACAGGTCCAACGCTGTATTGTCTC  
 CAACTCCACAAGTGACGGAACATGGCACCATCATACTTCAAATCTAGCGTCCAACCCGTTG  
 AACGTAAATAAATCTTTTTGTTACCATTAAAAAGCCTGCCAATGTTCCGAAAATCATTACTAC  
 ACACACTCCTCATTCTAGCAAAGAGCCTTCTCCAGCACCCACACTCAAATGATAAATCACTCT  
 CCGCCGAAGAACAACAACCTATTAAGTGATCATGCAGAGCTATCTCGCCAAGCTGTTCTCCAT  
 ACTCAACGGTCCGGTCAACCAACTCAAGTTACTACCTCGACTAAAACCACGAGAAATAGCCC  
 TGATAGTATATCAATTCCAAATCTGCGCGAATCACGGCAACGAAAATCAAACGTTACAA  
 TCTCAACCTCTTACCAAATACGAAGAATGGTATTGTGGAATCTGTCATCACAGTCAAAGGT  
 GTTCCAAAAACCATCATTGGCCCCGAAAAGATTGGGACGAATCCAAAAGTGAATATGAAA  
 CGAGAATATCAATCAAGAGAATTCTAATCGAAGTGACGATAGAGAAAGTTCAAGTTCAAATG  
 CAAGTTTTATTTCCAGTATTAAGAATAAATTTAAGAACGAAAACGCTAACAACAATGATCGT  
 TCTAATTTACCCGACTCTTTGTCAAGAACTTCCAATTATGATGCCAACGGCTCCTCGTCGAC  
 CATAAAAAGATGA

>YGL235W 1.71 Hot

ATGACCTTGTGGCCACATCCGGGGTCATACAAGATCAAGTCAGCAACTTTGTTCTGCAGCAG  
 AGACAAGTTGGGGTGTGCTTTCTTGTGCGAAAAGTTCCCTTTGCATGTATTTCTTATATAACT  
 CTCTGTCTATCTGGGCTCTGGGCCCCACACAGCAGGACCCCTTGCTTCTGTTTCAGCATTTTG  
 AATTGCACTCCAGCGAGATCAGTTACTTTGCCCATCAGCCATCGAGAGCGTCGATTTCCCTT  
 TACAAGGATGCCCTTACCCACTCCACCAATAGAGGGGTTGCACGAACACTTACCAATATCTG  
 TTAACGATGGTGAATGAGAGTAGTATGCGCACCCAGTCTTAGATGACGCAGCTGCAGCTTCG  
 CAGCTGCATGTCCAGCACCGATGACCACGACCTGTGTCTTGGTTGTGGGTTGGAAGCTTGT  
 CAAAGAAGATATGGTCAACCGCTCCTGAGGACCTGTAAGGGAAATGAAGTACACGAAGACG  
 CCAAGGTTGTTACACGCAGCATCGTTCCTTTGGGGCGTTTAG

>YJL121C 1.59 Hot

ATGGTCAAACCAATTATAGCTCCCAGTATCCTTGCTTCTGACTTCGCCAACTTGGGTTGCGA  
 ATGTCATAAGGTCATCAACGCCGGCGCAGATTGGTTACATATCGATGTCATGGACGGCCATT  
 TTGTTCCAAACATTACTCTGGGCCAACCAATTGTTACCTCCCTACGTGCTTCTGTGCCACGC  
 CCTGGCGATGCTAGCAACACAGAAAAGAAGCCACTGCGTTCTTCGATTGTCACATGATGGT  
 TGAAAATCCTGAAAATGGGTCGACGATTTTGCTAAATGTGGTGTGCTGACCAATTTACGTTCC  
 ACTACGAGGCCACACAAGACCCCTTTGCATTTAGTTAAGTTGATTAAGTCTAAGGGCATCAA  
 GCTGCATGCGCCATCAAACCTGGTACTTCTGTTGACGTTTTATTTGAACTAGCTCCTCATT  
 GGATATGGCTCTTGTATGACTGTGGAACCTGGGTTTGGAGGCCAAAAATTCATGGAAGACA

TGATGCCAAAAGTGGAACTTTGAGAGCCAAGTTCCECCATTTGAATATCCAAGTCGATGGT  
GGTTTGGGCAAGGAGACCATCCCGAAAGCCGCCAAAGCCGGTGCCAACGTTATTGTGCTGG  
TACCAGTGTTCCTACTGCAGCTGACCCGCACGATGTTATCTCCTTCATGAAAGAAGAAGTCT  
CGAAGGAATTGCGTCTAGAGATTTGCTAGATTAG

>YBR265W 1.51 Hot

ATGAAGTTTACGTTAGAAGACCAAGTTGTGTTGATCACTGGTGGTTCACAAGGTCTTGAAAA  
GGAATTCGCCAAAAAATATTATAATGAGGCTGAAAACACAAAGATTATTATCGTCAGTAGGT  
CAGAGGCTAGACTGCTGGACACATGCAACGAAATTAGGATTGAAGCTCACCTGAGAAGGGAA  
ACCACTGACGAGGGCCAAGTGCAACATAAGTTGGCTGCGCCCTTGGACCTTGAACAACGGTT  
ATTTTACTACCCATGCGACTTGTCTGTACGAATCCGTGGAATGTTTGTTCATGCCCCTGA  
GAGACTTGGATTTACTCCCTACACAAACGTTATGCTGTGCAGGGGGGGCTGTTCCTAAGTTA  
TTTCGTGGGCTAAGCGGACATGAGTTGAACTTGGGTATGGACATCAACTATAAAACAACTTT  
GAACGTGGCACATCAGATTGCCCTTGCAGAGCAAACCAAGGAACACCACCTCATCATCTTTT  
CTAGTGCCACCGCGCTTTACCCATTTGTGGGCTATTCCCAGTATGCGCCTGCAAAGCTGCA  
ATCAAATCACTGGTAGCAATCTTAAGACAAGAAGTGCAGAACTTCCGTATCAGTTGTGTTTA  
TCCCTGGTAATTTTGAAGCGAAGGTTTCACTGTAGAGCAGCTAACGAAACCCGAAATTACAA  
AGTTGATCGAAGGCCCTCAGACGCTATCCCATGCAAACAAGCATGTGATATCATTGCCAAG  
TCGCTGGCCAGAGGTGATGAAGACGTTTTTACAGATTTTGTGCGATGGATGATAATGGGGAT  
GGACCTTGGGCTCACCGCAAAGAAAAGCCGCTTTGTTCCGTGCAATGGATTTTTGGTGTCC  
TATCAAACATTTCTGGTCTGCCATTCTACATGGTTGGCTGTTCCCTGGTATATCAGGAAATGG  
TTTCGTGAAAATGACGGCAAGAAGGCCAACTGA

>YJL151C 1.54 Hot

ATGGACAGAGACCATATTAATGACCATGACCATCGAATGAGCTATTCCATCAACAAGGACGA  
CTTGTGTTAATGGTTTTGGCGTTTTTCATTCCECCAGTGGCCGTCTGGAAGCGTAAGGGTA  
TGTTCAACAGGGATACACTATTGAACTTACTTCTCTTCCACTGTTATTCTTCCCAGCAATC  
ATTCACGCTTGCTACGTTGTATATGAAACGAGTAGTGAACGTTTCGTACGATCTTTCACGCAG  
ACATGCGACTGCGCCCGCGTAGACCGTGACCTGGAAGCTCACCTGCAGAGGAATCTCAAG  
CACAGCCTCCAGCATATGATGAAGACGATGAGGCCGGTGCCGATGTGCCCTTGATGGACAAC  
AAACAACAGCTCTTCCGCGCGTACTTAG

>YER147C 1.76 Hot

ATGGAATACTTGCGCACAACTTAGTATTTCAACAAGTATACCACCTTAGCACAGGAATACAG  
AGACCATGCATATTTCAATTGCGAATAAAATCGGTTCTGAGGAAGGGTTGAAGCAGTATTATG  
GCCTCATGAACATGTCTATCCAGATGTTTCAGCTATTGAAAACGAAATGTACGCTTTCAGTT  
CTGGAGGATAGTAAGGTCACGTTTGAGATGGTGGAGTTATTGATACAGGAGACGTATAATTT  
TGACCTAGCAGAGCTTTACATTTCCAGTTTGAAGAACGGTTACAAACGCACCAGAGCGACA  
CAGATTTGGTAGAAGAGATCATGCGTTGCGAGTTTCTGCTGTTACATGACTTGCCACTTATG  
AGAGACAGTAAGTTCCACTATAAGATTGCACATAAGAAATTGCAATGAATTAGTCCAGTACAT  
GGTAAATTTGCAGGATGAGTTGTATCAAAATTTGGGCATCCGTATTCCAGTATGTGCGCGTGA  
TGCTTTGCATTAAGCTGAAACAGCACCCGAGGGTGAAGACGAGTTTTTCATGGGCTACTCTCG  
CAATGTGCGGAAAAGTCACAATGGAATGGTTTCTAAATCTGTGTTATGTGAATTACTTGCT  
AAATGAGAGGTTCCCAATCCCCGAGGATGCTCTGCAGGAGCTGCGAAGCACGGAGCTGCACA  
CGGTGGGGCCCTGAGCTATATGCATGGAAGTTGGCATTAGAGATGGTAATCCAGCTTTGTAAA  
GACGGGAATATTACGGACCACTTGAACGAATTCAAAAATTTCTTTGACACAAACAAGCAATC  
TCTAGTCACTAATGAAGGTAAGGGATGTGTGATCAAAATCATGCCAAGGATAGCGCTGAAAG  
TAGAGTTGCCTATGATTTTCCACTACAAAGAATTAAAGAACATACTGTTATTATTGCAAAGT  
GTCAGCTACATCGTGAACCTGTATGACGAAAAGGGCAATTTTTCCAGGAAGTTCCTCCCAA  
AGTCTATTCTACAACGCAGAACTGATTAAGAACATTGCCGCTGGCGGTGTTTCGATGAATG  
AGCTGGACTCACGAATCCAGACATAACAAGAGCATTCTTGAATTCTGTGAGTTTTACAAAGTG  
TGGGAACAAACACTCTTGAAGGGGGCCGTAGTGACGACCGAGTCACCTAAGTTAGGGCCCTC  
TCCAGGCTACGTGAGGCTGCTGCAAGCCATGAAGGTTTCAGTTTGAAGGCGGCGGGCCGTAG  
AAGAGTACACGCGGCTTGCACAATCTGGCGGTACATCCAGCGAGGTGAAGATGATATCGCTT  
CTGAATTGCTACACAGTGCAGGCGGCAAGAGTGAGCCGATGTTCCGGGGACAAACAGGGCGA  
ACTCGTAGAGCAATGCAACAAGGTGTGGCTTCAGGTGGAGAAATTGCTACAAGAAACGGATC  
TGCAGTTCAACCCCATATGGGAGTGCACAGTAACGATCCTATGGCTTTTCAGCCATTTCCGAG

CCGTTTCAGTTGGAACCCGCTGCCATGTAGTGACAAGCAGCGCGCCGAGTACGTGTGCGAAGCT  
 CCGCGAGTTCTACTCTAGCAACAAGTTCGTTGCCGGAGAAGCCGTTGCGGACAACCGCTTCA  
 AATTGAAGAAGGCTCTGTTGCTGCAAATACTGGTAAACTACTTAGGCGGTGCAATGCTCGAA  
 CACGATCTGGGCGAGATCTATGCGATTTTCAGCAAAGTGTTCGATATGTGCCGCCAGCAGGG  
 CGGCATGCGCAAAGTCCAATACGTGATCGGAATATGGCATTTAATGAATTGTACGGTGGCGA  
 TCGGGGAAAAGACGTGCTCTCACGAACGCGAAGCTGGAGGCGCTGGTTAAGCAAATCACC  
 AGTGTCAAACAATAA

>YGL166W 1.72 Hot

ATGGTCGTAATTAACGGGGTCAAATATGCCTGTGAAACGTGTATCAGGGGTCACAGGGCGGC  
 GCAGTGTACTCACACTGATGGTCCGCTACAGATGATCAGACGCAAGGGAAGACCATCGACCA  
 CATGTGGCCATTGTAAAGAGCTGAGAAGAACCAAGAACTTCAACCCATCCGGTGGGTGCATG  
 TGTGCCTCTGCACGACGGCCAGCTGTTGGCAGCAAGGAAGATGAAACACGATGTGCTTGTGA  
 TGAGGGTGAACCTTGTAAATGTCATACCAAGAGGAAAAGCAGCCGGAAATCAAAGGGAGGGT  
 CATGCCACAGAAGGGCAAATGATGAAGCAGCGCATGTCAATGGTCTCGGTATTGCAGATCTG  
 GACGTTCTTTTGGGCCTAAATGGTCGCTCGTCGGATGTAGACATGACAACCACATTGCCGAG  
 TTTGAAGCCACCTCTGCAAAACGGAGAAATTAAGGCCGACAGCATTGACAATCTTGATTGG  
 CTTCCCTCGATCCGCTTGAGCAAAGCCCTAGTATATCTATGGAACCTGTTAGTATCAATGAA  
 ACAGGAAGCGCATATACTACGAACACAGCACTAAACGATATTGACATTCATTCTCCAT  
 CAATGAGTTGAACGAGCTATACAAACAAGTATCTTCGCATAACTCACATTCACAATAA

>YOR203W 1.54 Hot

ATGGTACCAACGATGTTCCCTCCACCAAAGGTGTTCTTATGTAGTGACACCGATTATTTAAA  
 GCTGCAGCATAACGATATATATACATGTGTATATATGTATACCTATGAATGTCAGTAAAGTATG  
 TATACGAACAGTATGATACTGAAGATGACAAGGTAATGCATCATTCTATACGTGTCATTCTG  
 AACGAGGCGCGCTTTCCTTTTTTCTTTTTTGGCTTTTTTCTTTTTTTTTCTTTGAACTCGAGAA  
 AAAAAATATAAAAAGAGATGGAGGAACGGGAAAAAGTTAGTTGTGGTGATAGGTGGCAAGTGG  
 TATTCGTAAGAACAACAAGAAAAGCATTTTCATATTATGGCTGA

>YER159C 2.27 Hot

ATGGCAGATCAAGTACCAGTTACAACACAACCTACCACCAATAAAACCTGAACATGAGGTACC  
 ACTTGATGCTGGAGGGAGTCCAGTAGGTAACATGGGTACCAACTCGAATAACAACAACGAGC  
 TAGGTGATGTATTCGACAGAATAAAGACACACTTCCCTCCGGCCAAGGTAAAGAAAATAATG  
 CAGACAGACGAGGATATAGGAAAAGTTTCACAAGCCACGCCCGTAATAGCGGGCAGGTCCCT  
 AGAGTTTTTTTATAGCGTTATTGGTGAAGAAAAGCGGGGAGATGGCAAGAGGACAAGGAACCA  
 AGAGAATAACCGCCGAAATACTAAAAAAAACAATTTTTAAACGACGAAAAATTCGATTTCTTA  
 AGGGAAGGTCTATGCGTAGAAGAAGGCCAAACACAACCGGAGGAAGAGAGTGCCTGA

>YLR348C 2.13 Hot

ATGTCAACCAACGCAAAGAGTCTGCCGGTAAGAATATCAAGTATCCATGGTGGTACGGAGG  
 TGCAGCGGGTATCTTTGCTACCATGGTGACACATCCTCTTGACTTGGCCAAAGTCAGACTGC  
 AGGCGGCTCCTATGCCAAAGCCACACTCTTCAGGATGTTGGAGAGTATCTTGGCGAATGAA  
 GGTGTGGTGGGGTTATATTCCGGCCTGAGCGCTGCTGTGTGAGGCAATGTACATACACGAC  
 GGTGAGATTCGGTGCATACGACTTGTGAAAGAGAATGTGATCCCACGCGAGCAATTGACTA  
 ACATGGCGTATCTTTTACCTTGCTCCATGTTTCAGTGGTGCCATTGGGGGGCTTGCAGGGAAT  
 TTTGCAGATGTTGTAAATATCAGAATGCAAAACGACTCTGCTTTGGAGGCAGCGAAGAGGAG  
 AAATAACAAAACGCTATCGATGGTGTGTACAAGATATATCGCTACGAGGGTGGACTGAAAA  
 CCTTGTTTACCGGTTGGAAGCCTAACATGGTTAGGGGCATACTGATGACGGCAAGTCAGGTC  
 GTTACGTATGACGTGTTAAGAACTACTTGGTCAAAAATTAGATTTTCGACGCATCCAAGAA  
 CTATACACACTTGACAGCGTCCCTGTTGGCTGGCCTGGTGGCCACCCTGTGTGCTCTCCAG  
 CAGACGTCATGAAGACACGTATCATGAACGGCAGCGGAGACCATCAACCGGCTTTGAAGATC  
 CTTGCCGACGCTGTCCGCAAAGAGGGCCATCTTTTCATGTTCCGGGGGTGGTTGCCAAGTTT  
 CACTAGACTGGGTCCATTACAAATGTTAATTTTCTTTGCAATTGAGCAATTGAAAAAACATA  
 GGGTTGGCATGCCAAAGGAAGACAAGTAG

>YOR333C 1.56 Hot

ATGACAATACAGTTTGGCTTACACATGATGGTTGGAATAATATCAATAGAGGAGTTATCTAT  
 TTTCTCAGGTCTCTGGGAAAAGGGAATGTTTCAGTTAAAAAGGACCATTTAGGAACTTCT  
 CGGACATTGAGATAATATTTCCCTTAGAATTGAATACCGTACACGAAATGAACAGTGAATCA  
 GAGGCAGAAATGGGCTTCAACGATAGTAACTGTTTTCCGCAATATGGTGCTGTTGGTGTTC  
 AGCAGTGGATGTGTCAGCATACTTTCTAAGAAATGGCGTGTTCGGTCTTCCAAAAGTTATTC  
 TCGACAAAGGTTGGAAACAAGATATAGAACGTACCAGGAGACGCCGATTCATGAGATGCTTG  
 ATTGAAAATCACTTTCCTACTACGATTGCGTATACCGTTACTGTTAG

>YKL198C 1.69 Hot

ATGACAGTCTCACACAATCATTCTACGAAGATATCCCAACAACCAATCTCCTCGGTATCAGC  
 ATTTAAGTTCTTCGGAAAGAAGCTGTTAAGTTCAAGCCATGGGAACAAGTTGAAGAAAAAGG  
 CGTCTCTACCTCCAGACTTCCACTCTACAAGTACTAATGACAGCGAATCCTCCAGCCAAAA  
 CTGCCGAATTCGTTGAAAACCTCTCGCCGTGCAAACCTTTTCGCTCACACAACCAACAGCAA  
 GAGATCTTTATCTTCCGCCTCAACCAAGATCCTACCTCCGGCCGGCTCCAGCACGTCCATCT  
 CAAGAGGAAACAGACATTCGTCCACTTCGCGTAATCTCTCAAACCTCCAAGTTCAGTAGCGAA  
 CGATTAGTGTACAATCCATACGGCGTCTCAACCCCAAGCACGTCACTCTCGTCCGTCTCTAC  
 CTCCATGAAGAAAAGACCCTGATCTGGGCTTCTACCTTACAGATGGGGATTCCAAAATCCGCA  
 TGCTGCCGATCCCAATTGTGGACCCAAACGAGTATCTGCCCGACGAGATGAAGGAGGCAAGC  
 ATCCAGTTGAGCGATAACTTCGTCTTTGATGATGAGAATAAGACCATCGGATGGGGCGGTTT  
 GTGCGAAGTGCGCAAGATCCGCTCCAAGTACCGCAAGAAGGACGTATTTGCTCTAAAAGAAGC  
 TCAATATGATCTATAATGAAAACGCCCGAGAAATCTACAACGCTGCTCCAAAGGAGTTTATC  
 ATCGCAAAGCAGCTAAGTCATCATGTTTACATCACAAATACTTTTCTTCTAGTCAAGGTGCC  
 CACCACCGTCTACACCCTCGCGGGTGGGGTTCGTTCATGGAGCTAGGTCTACGAGATTTGT  
 TCGCGATGATACAAAAATCGGGCTGGCGCCACGTGGCCCTAGCAGAAAAAGTTTTGTATATTC  
 AAACAGGTGGCGTGTGGTGTCAAGTTTTTGCACGATCAGGGCATCGCCACCCTGATTTGAA  
 ACCGAAAATGTACTGCTATCCCGGACGGCGTGTGCAAGCTGACAGATTTTGGTATCTCAG  
 ACTGGTACCACACGGATCCACACGACCTGTCCAGCCCTGTCAAGAAGTGCGCAGGGATGATC  
 GGCTCGCCCGGTATGCTCCCCGGAGGTTCATGTTCTACGACTCCAAGAAGCACTACGATAC  
 GGAATTGCAACAGCCGTATGACCCACGCGCTTAGACTGTTATGGCCTGGGTATTATCCTCA  
 TGACCCTCGTCAACAACGTCAATTCATTTTTGGAATCCTGCAGCTTCGACACTGGTTTCCGC  
 GATTACTGTGACGCTTATGAAAACCTTTATCCGCTTTCACGATCGCGCATTCGCAATCGCGG  
 CAATTACCGCCCGGGCCGGGAATGGAGTATCACTTGGCTAGAAATTTCAAGAACGGACATG  
 CATCTCGCGTGGCATGGCGGCTCGCTGACCCAGAAGCCGCCACCCGCTACACCATCGACGAC  
 CTCTTCGAAGACCCATGGTTCCAAGGAATTGAGACTTGTGTTGATGCCAACGACAAATATGT  
 GTGTAAGAAACCTATTATCAAACCACTACGTACGAGAATCCGCGGGGTTCCATATCGCTA  
 CAGATGTTGCTGCAACCACACCCACCTCAAACCCATTCTTAAGAACCGAGTCCCATCAGG  
 TCAATGGTAGATATAGCCGCCATCCTTCCCCAACGGCCACGTTTTTAGCGTTCGTCGCCCTC  
 GCCGCTCCTCCGGCGACTCATGTGCCAGCCGAGGCCTTATTTACACTTAGGGAAACCCCGC  
 CGCCCCAGCTAGCAACCCTCACGCTTAGCGAAGAACCTCCCGCAACTCCCGCACCTTCCGCA  
 CCTTCCGCACCTTCCGCTCGCGTCCGTGGCCACTCCCCGCACAGGGTAGGTGCATCACCATC  
 TGAACATTGTCAACAGCTTGGTCCATAG

>YPL171C 1.87 Hot

ATGCCATTTGTAAAAGGTTTTGAGCCGATCTCCCTAAGAGACACAAACCTTTTTTGAACCAAT  
 TAAGATTGGTAACACTCAGCTTGCACATCGTGGGTTATGCCCCATTGACCAGAATGAGGG  
 CCACTACCCCCGAAATATTCCAAATAAGGAGTGGGCTGCTGTGTATTATGGTCAGCGTGCT  
 CAAAGACCTGGTACCATGATCATCACGGAAGGTACGTTTATTTCCCTCAAGCCGGCGGCTA  
 TGACAACGCCCCCTGGGATTTGGTCTGATGAGCAGGTGCTGAGTGGAAGAATATCTTTTTAG  
 CCATCCATGATTGTCAGTTCGCTGCGGTGGGTACAACCTTTGGTCTTTAGGCTGGGCATCCTTC  
 CCAGACGTATTGGCAAGAGACGGGTTACGCTATGACTGTGCATCTGACAGAGTGTATATGAA  
 TGCTACGTTACAAGAAAAGGCCAAAGATGCGAATAATCTCGAACATAGTTTGACTAAAGACG  
 ACATTAACAGTATATCAAGGATTACATCCATGCGGCTAAGAATTCTATCGCGGCTGGCGCC  
 GATGGTGTAGAAATTCATAGCGCCAATGGGTACTTGTGAAATCAGTTCTTGGATCCACATTC  
 TAATAAGAGGACCGACGAATACGGCGGAACGATCGAAAACAGGGCCCGCTTTACACTGGAGG  
 TTGTTCGATGCTCTTATCGAAAATATCGGTCTTGAACGGGTGGGTTTGGAGTTGTGCGCGTAC  
 GGCATTTTTAACAGTATGTCTGGGGTGTGTAACCAGGTATTATCGCTCAATATTCGTATGT  
 TTTGGGTGAATTAGAGAAGAGGGCAAAGGCTGGTAAGCGTTTGGCCTTTGTGCACCTCGTTG

AACCACGTGTACGGACCCATCGTTGGTGGAGGGCGAAGGAGAATATTCCGAGGGTACTAAC  
 GATTTTGCCTACTCTATATGGAAGGGTCCAATCATCAGAGCTGGTAATTACGCTCTTCATCC  
 AGAAGTGGTTAGAGAACAAGTAAAGGATCCAGAACCTTGATAGGCTATGGTAGATTCTTCA  
 TCTCTAACCCAGATTTAGTCTACCGTTTAGAAGAGGGCCTGCCATTGAACAAGTATGACAGA  
 AGTACCTTCTACACCATGTCCGCGGAAGGTTATACCGACTACCCAACATATGAAGAGGCAGT  
 AGATTTAGGTTGGAACAAGAACTGA

>YOR332W 2.15 Hot

ATGTCCTCCGCTATTACTGCTTTGACACCAAACCAAGTGAACGATGAATTGAACAAGATGCA  
 AGCTTTCATCAGAAAGGAAGCTGAAGAAAAAGCGAAGGAAATCCAATTGAAGGCTGACCAAG  
 AGTACGAAATCGAGAAGACCAACATCGTAAAGAAATGAAACCAACAACATTGACGGCAACTTC  
 AAGAGCAAGTTGAAGAAGGCCATGCTTTGCAACAGATTACTAAGTCAACGATAGCAAACAA  
 AATGAGGTTGAAGGTTCTTTCTGCTCGTGAACAGTCGCTAGACGGGATAATTCGAGGAAACCA  
 AGGAAAAGTTGTCAGGAATTGCCAACAACCGGGACGAGTACAAGCCATTTTGCAATCATTG  
 ATCGTGGAGGCATTTTGAAGTTGTTGGAACCTAAGGCGATTGTCAAGGCTCTTGAAAGAGA  
 CGTCGATTTAATCGAGTCGATGAAGGACGACATTATGCGTGAGTATGGGGAAAAGGCCCAGC  
 GCGCACCATTGGAAGAGATTGTTATCTCCAATGATTACTTGAACAAAGACCTTGTTTCCGGC  
 GGTGTTGTGGTCTCCAATGCATCAGACAAGATTGAAATTAACAACACTTTGGAGGAAAAGATT  
 GAAATTGTTAAGTGAAGAGGCATTGCCCGCCATCAGATTGGAATTGTATGGTCTTCCAAGA  
 CAAGAAAGTTCTTTGATTGA

>YJL211C 1.54 Hot

ATGTGTGATCTTCTTCCACACGTACCCTGCCAAGACAGTGACGACATACAAGGTGCGTTTCC  
 TGCCTGAAAAACCACGCCACTGAGTGCGGATCCATACGTACAGCTAGAGCCATAGTGTGGC  
 AGGAACCTCGTCGCGCACATAAACACAACACTGTGTTCAAGTCCAACTCCCATTTCTTTGTG  
 TTCCTCGTATTGAATGCTGCATTGAACTCGGACCAAAAAGTCCATACAATTCTTTATCAA  
 GCGCTATCGAGTCGAGCTGTGCAACTCGAGACATGCTGCGTTGCCTTTAGATTACGTCTTCT  
 CAGTTATCTCGGCAATCTCTCCTCGTTATGCTTTCCCTCCGTCTTCACTCATCCCTTATAAT  
 GCGTTTCCAGCAACCTTATCGATAGAATGGAGGGGAAATCGCATCCGTTCCTCCTCGGA  
 TCGATACTAA

>YGL200C 2.2 Hot

ATGGCCTCATTGTGCTACTAAGTTTGTCAATTGCTTGGCTTCCCTGTTCTTCTCGGCGTCCGCCA  
 TAATGTCCCTTCTTCCAGCTTATGGCCGTAGATGCTTCTTCAAGACTTGAGTAAGGGTGACG  
 AGCTCTCCATTTCTTCCAGTTCGAGTTCGAGTATAGAAACCTCAATCCAGTAGCCAGCTGACTGGT  
 GACTTTATCATCTACGGGCCGGAAGACATGAAGTTTTGAAAACGGTTAGGGACACGTCGCA  
 CGGTGAAATCACATTGTCTGCTCCATACAAGGGACATTTCCAATACTGTTTCTTGAACGAGA  
 ACACCGGTATCGAGACAAAAGACGTGACTTTCAACATTCATGGGGTGGTATATGTGGATTTG  
 GACGACCCAAACACCAATACATTGGATAGTGTGTGAGAAAGTTGTCCAAATTAACCAGGGA  
 AGTCAAGGACGAACAAAGTTATATTGTTATTAGAGAAAGGACGCATAGAAATACTGCAGAGT  
 CGACCAACGATCGTGTAAATGGTGGTCCATCTTCCAATTGGGCGTCGTTATTGCAAACCTCT  
 CTTTCCAGATATACTACTTGAAGAAGATTCTTTGAGGTCACATCTCTAGTCTAA

>YCR061W 1.96 Hot

ATGGTGCCTTTTGTTCATTTTAAAGTTTATTCGGCTGCGCGGCGACGCTTGTACGGCCCA  
 TGATGACATGGACATGGACATGGATATGGACATGGATATGGACATGAATATCGATACGACAA  
 CGTCTCAATCCATAGATGTCTCATCCACGGCTTCAATCGTCCCCGTGCCACATGAACCAAAA  
 CATTTGCATGGCCTTCCCTATACTGCAATCGCCCTCGCTTACCCCTGCGGAGAGATTGTACTG  
 GGAAAACACTACAACACCACAACCTACTTTACTACACAGGCTGGGAATAGGTCTGCCCTTCGCT  
 ACCACATTATTACGCTGCTCTTGGTTGCATTTGTGCTCTACCCTGTGTCCCTGGCGCTAAGC  
 GCCGCCCGTTCTAGGTGGTACTTACCCCTGCTGTTTGTAACTATGCATTTGTATTTTCGTC  
 CGTAATGGCATTGTCCGTGTTCAAAAATACTTTCCCGGAAGAAGACTGGTATGCGCATAATA  
 TCTATGGCACCATTCTGTGCTACTTCTCGTTTTTATGCTTGTTCACTTCTTTCGCTGCGGTG  
 CTTTCTGTCCCCGTCTCATTAGCATCGAAAAAGGAGTACCGTCCGGTTGACACCATCCCTCT  
 GAATGATCTTGAATCTACGCCGTCATGGTGAATAGTGCACGTGGCTCTCCAAGTCTTCTT  
 CCAACAGAGACACGTTGTTCTCGCTCTCTTTCAGACACCACGACCGCCACGGCCACCAATAAT  
 AATAAACGGAGACGCGCTGAAGGCGAAGACGAGGGTGATAACACCTCCAACCACGACACTTT

GCGCGACGAAGACTACGATAATGATGACGACGAAATTGCTTCCATTGAAGCGCCACCTCTGC  
 TTCTCAAGACATACCCGTTTTCCGAATCTTGTTTACCAACACGAAGTACCAGATGCTTGCC  
 GCGCACCTCTCGTGCGTCGCCAACGTGGTCTTTCACATGCTTACCTACCCGCTATTCATGTA  
 CATCTTTGTAGACCTAATCATCGGCTTCGCTGTAGGTAACCTTGCTCGGCAAGGGCATCCGCA  
 TCTTTAATCTCTTGGCCCACTGGATTAAGGGCGGCGTATTTTTTACTCTGGGCGTTGTCTCT  
 TTAGCAAGATACTGCGGTTTTCGCAGCTAAGTACGGCTGGGCATGGAACAACATCAGCTTAC  
 CTCTCAACTCACACAAACGCGTTCCTCCAATCTTCTTTTTCCGGTTTTGCTCCTGCGGGGACTT  
 TCACCATGGAATTCGTTGAATCCTTCCCTCATTTTTCTTTTTACGGGTCCACCAACATCTTCTTG  
 GAGCACCTGGCAGGAAACGGCGGCGCATGGACTGCCAAGGATTTACAGCATGTGTGCGATCGC  
 GTTTATGTTTCATAGGAACCGGATTTGTGTGGGCTACTCACGGAGTACAAGCTCAACCATTTGGC  
 GATTCGAGCATGCCCGCAAACGGCCACAGACCGATGTAGTTGCTGCCACACCGGGGTACTCT  
 CCAAACCCGTTCCCGCTTTTACCATATTTTGGACTGGGATTTCTGATGTCCAGCACGCACA  
 GTCTTCGCAATTTTTCTACTACCATTACACGCAATGGGGATACTTGTGTCTTATGGGTCTCT  
 TCTTCCGTCTGCTAACATTTTTGATTCTGTTTTTGGTGCCCAACACCAACAGTGCCGCATCC  
 AAGCCTTTCACGGAGTTGATCACCTCGTTCTGTCTCCTCTGTGGTGGTCTGGTATTTATGGA  
 GTCCACGGATCAGTCCATTGAAGCCATGGAATATAGGGGGTTTACCCCCATGTTCACTTTCA  
 ACCTCAGTGTGGATTGTTTTCTTTGTTGATGGCTTGGGAAATGATTTTATTTATTTGGAAA  
 GACTGGCTCATCAAACAGGAAAACCAGTCTTTAA

>YCR048W 1.95 Hot

ATGACGGAGACTAAGGATTTGTTGCAAGACGAAGAGTTTCTTAAGATCCGCAGACTCAATTC  
 CGCAGAAGCCAACAACGGCATTTCGGTACGTACGATAACGTGATCCTGCCACAGGAGTCCA  
 TGGAGGTTTTCCGCACGGTTCGTCTACCACGTGCTGGTGGAGCCAGTGGAGTCGACTGAAGGA  
 GTGGAGTCGACTGAGGCGGAACGTGTGGCAGGGAAGCAGGAGCAGGAGGAGGAGTACCTGT  
 GGACGCCACATGCAAAAGTACCTTTCACACCTGAAGAGCAAGTCTCGGTGAGGTTCCACC  
 GAAAGGATGCTAGCAAGTATGTGTCGTTTTTTGGGGACGTGAGTTTTGATCCTCGCCCCACG  
 CTCTGGACAGCGCCATCAACGTGCCCTTCCAGACGACTTCAAAGGTCCGGTGTGGAGAA  
 ACAGCTCAAAAATTTACAGTTGACAAAGACCAAGACCAAGGCCACGGTGAAGACTACGGTGA  
 AGACTACGGAGAAAACGGACAAGGCAGATGCCCCCCAGGAGAAAAACTGGAGTCGAACTTT  
 TCAGGGATCTACGTGTTTCGCATGGATGTTCTTGGGCTGGATAGCCATCAGGTGCTGCACAGA  
 TTAATATGCGTTCGTACGGCAGTGCATGGAATAAGCTGGAAATCGTGCAGTACATGACAACGG  
 ACTTGTTCACGATCGCAATGTTGGACTTGGCAATGTTCTGTGCACTTTCTTTCGTGGTTTTT  
 GTGCACTGGCTGGTGAAAAAGCGGATCATCAACTGGAAGTGGACTGGGTTGCTTGCAGTGAG  
 CATCTTCGAGTTGGCTTTTCATCCCCGTGACGTTCCCATTTACGTCTACTACTTTGATTTCA  
 ACTGGGTACAGAGAATCTTCTGTTCCTGCACTCCGTGGTGTGTTTGTATGAAGAGCCACTCG  
 TTTGCCTTTTTACAACGGGTATCTTTGGGACATAAAGCAGGAACCTCGAGTACTCTTCCAAACA  
 GTTGCAAAAATACAAGGAATCTTTGTCCCCAGAGACCCGCGAGATTCTGCAAAAAGTTGCG  
 ACTTTTGCCTTTTTCGAATTGAACTACCAGACCAAGGATAACGACTTCCCCAACAACATCAGT  
 TGCAGCAATTTCTTTCATGTTCTGTTTTGTTCCCGTCTCCTGTGTACCAGATCAACTACCCAAG  
 AACGTGCGCATCAGATGGAGGTATGTGTTGAGAAGGTGTGCGCCATCATTGGCACCATCT  
 TCCTCATGATGGTCACGGCACAGTTCTTTCATGCACCCGGTGGCCATGCGCTGTATCCAGTTC  
 CACAACACGCCACCTTCGGCGGCTGGATCCCCGCCACGCAAGAGTGGTTCACCTGCTCTT  
 CGCATGATTCGGGCTTCACTGTTCTGTACATGCTCACGTTTTTACATGATATGGGACGCTT  
 TATTGAATTGCGTGGCGGAGTTGACCAGGTTTGGCGACAGATATTTCTACGGCGACTGGTGG  
 AATTGCGTTTTCGTTTGAAGAGTTTAGCAGAATCTGGAACGTCCCCGTTCAAAAATTTTACT  
 AAGACACGTGTACCACAGCTCCATGGGCGCATTGCATTTGAGCAAGAGCCAAGCTACATTA  
 TTACTTTTTTCTTGAGTGCCGTGTTCCACGAAATGGCCATGTTCCGCATTTTTCAGAAGGGTT  
 AGAGGATATCTGTTTCATGTTCCAACGTGTCGAGTTTGTGTGGACTGCTTTGAGCAACACCAA  
 GTTCTACGGGCAAGACCGCAGTTGTCCAACGTTGTCTTTTCGTTTTGGTGTCTGTTTCAGGGC  
 CCAGTATCATTATGACGTTGTACCTGACCTTATGA

>YOR179C 1.89 Hot

ATGGATTTACCCAAGGACAAAAGTGACAGAACTCATCAAAGAATTAATCTAAATAACAGTGG  
 GACAGATCGAACTAATGATTTGTACCTTCATATTTGTCCAAACGTTCCGGTGCATAGAAACAA  
 CTGCAACGGAAAATGCCACGAAACTGTTAATGCTGGGTGACGTCGAAGTAGAAATATCTGCC  
 AGCAGCGTTTTCAATTGAGTGGACACAGAAGTCAATGATAAGCCAAACAATTGCCGATAGTAT  
 AGTAATAATGATCATCGTTTTGTGTGCAAGCGACAAGAACGTGCTATCTGAATCAGAATTGA

AAGAGAGAAACCATAACGTTTGGGAAGATCCAAGAATTGCAAAATCTGTTTCGAGAACAATTT  
 GGAGACAGTTTTAGCATCGATGAAGGAATAGGAAAAAAGAAAATGTAAAGAATGGTAGCGT  
 CACCATAGGCAAGAGTAAAGCCACGATCGATTTCTCCACCATGAAGCTGATTGATTGTAATT  
 CGAACCCACTAAAGGGAAGAGTGGAGAGCATACTAAGCATTTGGCCAGAAATTAACAACCTCCA  
 TTGTGCTGA

>YEL057C 1.67 Hot

ATGGCAAATGATGGGATTCAGAGGAATGACAACAGAAAGGGTTTTAAAACGTACAGTTCTC  
 GGCTTATTCTAAAGAAATTGACGTCATAATGAAAAAATATCATTCTTGGAAAGAAACATTA  
 CCCAACAACTAGATACTCTTCCCTCATTTTCCAAAAACCTTACCACCAAATCACAAAGATTGT  
 GTAAGTAGAAAGCACAGGGCCAGGCGAGGTTGGAGTAGTCAGCTGAAAACTTGCTAGGCAT  
 TTAATCCAAAGAGGAAATTTTTACTCTGGATAATTTAGCTGCAACACTGCATGATCAAGTTT  
 TAAAGTTACAAGCTACACTTTTTCCCAATGCCATACTGAAACAGGTTTCATCTCGACAATGCC  
 AACATAGAAAAACAAGAGAATTCTGAAGGAAATACATATAAATACCTTTCCAACGAAAACTG  
 TAAAGAGGAGAACAAATTCGGAACATTCATCGTAAAGAGAATTTTTTTTTGGTGACTTATCAC  
 TCGGGGTTTTCCGTGTTAATCAACCGTATTGCTTTTGAATCGGCCACATCATCCATTATGGTA  
 GTGAGAAGTTCAATTTATTGAAAGTGATTTCTTTTATGAAGATTATTTGATTTTCGATTGCAG  
 AGCGAAACGACGAAAAAATTTGAAGAGGAAAAATTTGTTTATTTCCACTACCATGAATTTCA  
 ATTACCAAACCAAAGTCTAA

>YBR127C 2.24 Hot

ATGGTTTTGTCTGATAAGGAGTTGTTTTGCCATAAATAAGAAAGCCGTCGAACAAGGTTTCAA  
 TGTGAAGCCTAGATTGAACTATAATACGGTCAGTGGTGTGAACGGTCCATTAGTCATTTTGG  
 AAAAGGTCAAGTTCCACGTTACAACGAAATTTGTTAATTTGACATTGCCAGATGGAACCGTG  
 AGACAAGGTCAAGTTTTTGGAAATTAGAGGAGATAGAGCCATTGTGCAAGTGTTTGAAGGTAC  
 ATCTGGTATTGATGTCAAGAAGACTACCGTGGAATTCAGTGGTGAGAGTTTGAAGAATTCCTG  
 TGTCTGAAGACATGTTGGGTAGAATTTTTGACGGTTCTGGTAGACCCATTGACAACGGTCCCT  
 AAAGTTTTTCGACAGGATTACTTGGACATTAACGGTTCTCCTATCAACCCATATGCTCGTAT  
 TTATCCAGAAGAAATGATTTCTACTGGTGTCTCTGCTATTGACACAATGAACTCCATTGCCA  
 GAGGTCAAAGATCCCAATTTTCTCCGCATCAGGTTTACCACACAACGAAATTCGAGCACAA  
 ATTTGTAGACAGGCTGGTTTTGGTGAGACCTACCAAGGATGTTTCATGATGGTCATGAAGAAA  
 TTTCTCCATCGTTTTTGGCTGCCATGGGTGTCAACTTGGAAACCGCTAGATTTTTCAAACAGG  
 ATTTGCAAGAAAAATGGGTCTTTGGAAAGAACTTCATTATTTTTGAACTTGGCTAATGACCCT  
 ACCATTGAAAGAATTATCACTCCAAGATTGGCCTTGACCACCGCTGAATACCTTGCTTACCA  
 AACGGAACGTCATGTGTTGACCATCTTGACCGATATGTCATCGTATGCTGATGCTCTTAGAG  
 AAGTTTCCGCTGCTAGAGAAGAAGTTCCAGGTAGAAGAGGTTATCCTGGTTACATGTATACA  
 GATTTGTCCACAATTTATGAAAGAGCAGGTAGAGTAGAGGGTCGTAACGGGTCCATCACTCA  
 AATACCTATCTTGACAATGCCCTAACGATGATATTACGCATCCAATTCGATTTGACCGGTT  
 ATATTACCGAGGGTCAAATCTTCGTTGACCGTCAATTACATAACAAGGGTATCTACCCACCA  
 ATCAACGTCCTTGCCCTTCGTTGAGTAGATTGATGAAATCTGCCATCGGTGAAGGTATGACCAG  
 AAAGGACCACGGTGACGTTTTCTAACCAATTGTATGCCAAGTACGCCATCGGTAAGGACGCTG  
 CTGCTATGAAGGCCGTTGTGCGGTGAAGAGGCGTTATCCATCGAAGATAAGTTATCTTTGGAA  
 TTTTTGGAAAAATTCGAAAAGACCTTTATCACACAAGGCGCCTACGAGGACAGAACCGTTTT  
 CGAAAGTTTGGACCAGGCATGGAGTTTGCTAAGAATCTACCCTAAGGAGATGTTGAATAGAA  
 TCTCCCCAAAGATTTCTTGATGAATTTTACGATAGAGCCAGAGACGATGCCGACGAAGATGAA  
 GAAGATCCCGACACAAGAAGCTCCGGTAAGAAGAAGGACGCCAGCCAAGAAGAATCTCTAAT  
 CTAA

>YCR051W 2.08 Hot

ATGAACGCTAATATATGGGTGGCTGCTTCAGATGGTAATTTGGACCGAGTGAACATATCCT  
 CCGCGAGAGTAAAGGCGCCATGACCCCGCAATCCAAGGACATTAACGGCTACACTCCAATGC  
 ATGCTGCCGCCGCATACGGCCACCTGGATTTGCTGAAGAAAATGTGCAATGAGTACAATGGA  
 GACATTAATGTGTTGGACAACGACGGCGATAACCCGTTGCACCATGTGGAGGATGTGGCCAC  
 TGCCAGGTTGATCGTGGAAGAGCTGGGTGGAGACTTCACTATCAGGAATGTGGAGGGCCAAA  
 CGCCATACGACTCGTTCGTCGAGAACGGTGAAGATGGTGAGCTAATCGAGTACATGAGGATT  
 AAGTCCGGCGTGGCCGATGTTACGGAGTGGACGGCGTGCAGGGTGAGGGTGTTCATCGACAG  
 CAAATGCTGGAAGAGTTCAAGGACAACGTGAGATACACCTTGGAAAAATGACCCTGAGGAAG

GAGCCGATGAGGCCACTCTGCAACGCAGGAGGCAGTTGGAACAGATCATTACGGGAGACAAC  
 GCTGAGGAGGAGTTGGAAAGGTACATCCGTGCTATGGTCAGAGAGCAGATGCTGGGCCAGGG  
 CTCATGGCGGGTCCGGGGACGAACCAGATTCCAAGAGAAGAAAATAA

>YGR201C 1.52 Hot

ATGTCCTGACGGAACACTGTTTACTGATTTGAAGGAGAGAAAAGTTGATTAGGACCATTGTGCC  
 AAGAGGTTTAGTGCGTTCCTTGAAGCTGGACGTTAAGCTTGCTGATCCAAGTGACGCTCAGC  
 AACTTTACGAAAAGGAGTTTCCCTTGCCTAAGTACCCAACTTTTGTGGACCGCATGACGAG  
 TGGACGCTTACAGAGGCAATGGCTATTGACTACTACTTGGATCCATCTGTCGAGCGACAAGGA  
 AGCTGTGCGCCAGTTGTTGGGTCCCGAAGGTGACTTCAAACTCGTGCAGATATTTAAGAT  
 GGAATCGCTTTCCAACAGTGATTTCTTGAATGAGGTTTGTGAGGTGTTTTCCCTCTAATT  
 GCGTAAAGCCATATAATGCCACTGAATTCAAAGCCGCAAGAGAGAATGTCGACACCATTGT  
 TTCGCTTTACGAGAAAAGGTTAAAGAAAACAGCAATACCTTGTCTGTGATGACCACGAAAATC  
 TTGCTGATTTAATCTCAGCGGCTGCTTTTTCGCTAGGGTTTATAAGTTTTTTCGATGAAACA  
 TGGAGGTCTAAGCATCCAGAGGTTACGCGCTGGTTAATCGAGTAATTAAGTCCCCTTTTT  
 TGAAGGTGAATTTGAGAGTTTCAAAATGTGTGAGACTGAGATGCAACCCATTAAATAA

>YFR023W 1.72 Hot

ATGTATTCTATTTCAAACAAAAAACCTTCTATACTCAGTATGGTTCCCTGAATATTTTGAA  
 AAACCAGGATTTGAAAGTAAAAAAGATCAAGAAAAGAAAATATCATTTAACCCCGTAGTTA  
 CTCTATTAGGCCAGACGACTACCACGAAAAAACATCCAGATCGTCAAGTTCGAGCCATTCT  
 GATTCACCTGAATTTTTGAGAAATTAACAACAACAATCCGGTCAAGAATGGAAAATTGAA  
 AAGTTTTGAAAGTAAAAAACTAGTTCCGCTATTCATTGGTGACCTCCATGAAACAGTTACTG  
 AAGAACTTTAAAAGGGATCTTCAAAAAATATCCCTCTTTTGTCTCTGCTAAAGTTTGTCTT  
 GATTCAGTGACAAAAAATCACTGGGCCATGGTTACTTAAATTTTGAAGACAAAGAAGAAGC  
 TGAAGGGCTATGGAAGAATTAATTACACGAAGGTTAATGGTAAAGAAAATTAGGATTATGC  
 CATCATGAGGAATACAACGTTTAGAAAGAATTTCCGGCACTAATGTCTTTTTCTCTAATCTA  
 CCTCTAAATAATCCATTATTAACAACAAGAGTATTCTATGATACGTTTTCTAGATATGGTAA  
 AATCTATCATGCAAATTAGACTCTAGGAAAGATATAGGATTTGTTTACTTTGAGGACGAAA  
 AAAGTGCAGAAAATGTGATCAAAATGTACAATAATACCAGTTTTTTTTGGTAAGAAAATCTA  
 TGTGGAATACATTTTGATAAAGAGGTGAGAAGTGTCCAAATTTTGAACACAAAAATCACG  
 ATTAGATGCGGAAACAATTATTGAAAAAGAGCAATCTTTGAATGAGAAACACTCCAAGGGGA  
 ATGATAAGGAATCTAAAAATATTTACTCTTCATCCAAAATCTATATTCATCAAAAACCTT  
 CCAACAATAACTACAAGGGATGATATTTAAATTTCTTCAGTGAAGTGGGTCCAATTAAGTC  
 AATTTATCTATCCAATGCCACTAAAGTTAAATATCTTTGGGCATTTGTTACATATAAAAAATA  
 GCAGTGACTCAGAAAAGGCAATTAACGCTACAATAATTTTTATTTTCAGAGGTAAAAAGCTT  
 TTAGTAACCAGGGCACAGGATAAAGAAGAAAGAGCCAAATTTATAGAATCTCAAAAAATATC  
 TACACTTTTCCCTGAAAATTTAAGCGCTGTCTGCAATAAGGAATTTCTTAAATATTTATGTC  
 ACCAAGAAAATATTAGACCGTTCAAGATTCAGATAGATGGATATGACGAAAATTTCTTCTACA  
 TATCTGGGTTTCATCAAATTCAGGAATTTTGAAGATGCTACGAGAATATTTAACTTTTTGAA  
 TAACCGTTTAGTAGGAGGAAGCATCGTCACGACATCTTGGGAAAGACAAAATAATGCACCTA  
 AATATCATGATGGTTATGGAATGCGCAATATACACACCTCTTCTCATCCACAAATTACCCCA  
 TATTACCAGTACTCACATGCGAATAGTTTGAACCTCCACACATGAGAGATCTTTCGTCAAT  
 GAATAGCAGCACAAGATCACTAATAAAGAATAAAAAATTTCAATAAGAAAAGTTTTGGAAACAT  
 TCGAAAAGCAAGTAAGAAGAGGTATAGATTTTCATGAGATTTCCAAGTGCCACTAGAGACGAA  
 AATGTGCACGGAATAGCTGAGTATATATTCGACACTTATTGGAATCGCGATGTGTTAATATT  
 GGACAAATTTTTATCGTTGCTAAATAGTAGTCCATATCATGAAGGTGTATTGCAAAAAACAA  
 TTGAAGAGGCTGCAAGCTCGTTAGGATTTAAAAGATGA

>YBL093C 1.92 Hot

ATGGCTTCTAGAGTGGACGAAACTACAGTCCCCTCATACTACTATTACGTGGATCCGGAAAC  
 TACATATACGTACCAACAACCAAATCCTCTACAGGACTTGATATCGGTGTATGGCTTGGATG  
 ACATCTCCAGGCAAGTGGCAAGAACAATTTGGACGGCACTAAAGCCGTGAAGCTAAGAAAA  
 TCTTACAAGAACCAGATAGCAGATCTTTCAGGTAATTTCTCCACCATAACCGACCAGAGAAAA  
 TGGTAAAGGTGGTCAAATAGCACATATTTCTTTCCAAAATAACCCAGACATGATGATACAAC  
 CACCTCAGCAGGGTCAAAACATGTCAGAGCAACAATGGCGCGAACAGCTGCGCAATAGAGAC  
 ATAGCATTGTTTCAGCCTCCAAATTTTCGATTTGGACCTTTGCTCTTCGGTACTATCGCAGTT



TGAAAGGTCATATCCAAGCGAGTTCGCAAACCAGAACCAAGGGGGAGCCCAAGCGCCGTTTG  
 ATATAGACGACTTGGCGTTTGATCTAGACGGTACAGGAAAAAGCCAATCCGGCTCAAATTC  
 GGTAACAATAGTAAGAAAAGGAAGAACAAATCTAGTGGAAAGTTCGATGGCTACACCAACACA  
 TAGTGACAGTCATGAGGATATGAAAAGAAGGAGGCTGGAGTAG

>YDL183C 1.69 Hot

ATGATACGTTCAATATTTATACCGCCAACTAGTATAACTGCCACTTCTCGACTGTTCTACGG  
 AATGAGGGCGTATTCACAAAACTTGAAAAGGCTTCACTCCAAAAATATCTGCATGATCCTG  
 TTAAAGTGACTGTGATACCAATAACGGACAAAAGAATCATTCATTTACTATAAGCATAACCGAT  
 AATCTCTTTAATAGTCAGTCTAGAATATTTAAAAGCAGAAAAGTGGATCGTTGAGAAATCAGC  
 AAAGCTTTGGAGAAAAGTAAAAAGTCCCTAAATCGTATAATAAAAAAATAGTGTCCATGG  
 TGCAGTCTCTGTTAAATAGCACACCCTGGTCAGAAAATAGTCTGTTAACCATACCAAGTGAA  
 AGCTATATATTGAAGAGAATTAAGGGAGAGAAAGATAAGACCCAAGAGATTCGACTCACATT  
 GAAAGATTATACCGTAAAGGCAGAACAGGTCGATACTCAACCCTTACACGTGTATTATCCCC  
 CTGGAATTTCTAGCCCTGATGAGTGCTTGAGACAAATGAAAAGCTCTACCAAGAAGGCTTA  
 ATTTATCACAAAAAATGGACTTTTATATTGCCTTTTAGGTCTCCCGCTGACAATTCCTCTAAT  
 TTTAATACCGCTTATACCAAATGTTCCAGGGTCTACCTATCTTATAGAGCTTATGTTAATA  
 TCAAAGCTTACCTTGGTGCTAAGCACTTGAAGAGTCTACTGGAAAGTTCAAAACAAAAATTTA  
 GAATTCAGGGAAGTGTGGGATATACGGAAGTATATAAACGTGGGACCAGCAGCCGTACGCA  
 GGGCAATCAAAGGAATCAAAGGTGCACCAGAATTACTACTTAACAAGAAAACCTTCCGT  
 TGATCTTAGATTTCTTAGAGGTTTATGAAGTGAAGCGACTTGAACAAAGTCATCCTTCAA  
 GAATCGAAATCTCAAGAGAAAAACAAAATTTAA

>YNL304W 1.55 Hot

ATGTCCCAGAGAAAGCGATACTCATTGAACGTCGTCACGTCCCGTCGATACCGTCACCGAC  
 ACCCAGTGCACCGATACGGACTAACGAATCCAATTGGGAAGCTGCTTCGCCAGCGAGTGCTG  
 CATCTTCATTTCTCCGAATGTTTCATCATGGTGGCACGGTTTTGAATCCTGGGTTGGGCATA  
 ATGAGGTCACCTTCGTTGAACAAGTCTGGTGCCTTTGGCCGGTCCGGCAGCAGTGGTTCAG  
 TACAGTAATAGAACCCTCAACATAAAGTTGCTGCTAATTGGAGATGCAAACGTAGGGAAGA  
 CAGCTATGATTTTGGAGCTATTGCCGGAACTGTTGACACGAGCGGAAATGTCACGATCGGCG  
 CGACTGAGGCACCAGCAGCAGCAACAGCATAAAGACTTAGGATTGAAGAAAAGTGTGGTGAA  
 CCATAGATTAAGCATGAAAGAGAAAAAGAAAACGGTACAGCTCTAACGATTTTGAAGAGGAGT  
 TCAAAGATATTAATCATTTTGCAGACGAAACAAGCGATTTTCGGAACCCGAACATCGGTGAT  
 GATAACAACCACGAAATGGCGGATCCTAATGAGATTGTCATCGAAACCAGAAGTACTATCGG  
 AATAGACATCAAGACGAACCTGGTCAACATAGATAACCGGTTTTTTAATGTCATACTGTGGG  
 ACCTGCGGGACAAGAACGGTACCAAAAACGCAATCATTCCATCACTGTACAAGAAGACTAAT  
 GCGGTGATATTAACCTTACGATATAACAAATGCGAAGTCCCTTCAAAGCTGTATGGAGCGGTG  
 GATAGTTTCCAGGCGTTGGAAAAGTCTTCTCCAGGATTTGTTAAAAGCAAGATTTTTTCTGG  
 TGGGTAACAAGATTGACCTTTATAAGGAAAGGCAGGTAACCCATTATGATGTGGTGCAAATG  
 GTTCAGGAAATGCAACTGAAACATGGTATTAAAATTTTCGGGAAACTTTGAAGTAAGCTGTAA  
 ATGGGTCAACGTGGTGGAGAGAACCATGAATATGATAATACTAGACCTGGTTGAGAACGGAT  
 GTTTCGAAAACAATGATCCTTGTGTGTGCGATTACAACATCTGACGACGTCCAGGGACATGAG  
 CAAGAATTCACGATACAGTAGAAGAGCCTTCAATTTCACTCGGCAACGTCAACACCAACT  
 TGAATAAATAACACAGTGGATATTACAAAACCTAATGACGACATTGCAAATAATCAATCAA  
 TTTGTTGCGTTTTAG

>YGR208W 1.77 Hot

ATGTCAAAGTTTGTATCACCTGCATAGCTCATGGAGAAAATCTCCAAAAGAAACCATCGA  
 CCAGATTGCGAAAGAAATTAAGTAAAGCTCGGCGAAAGATGTATCAATCAATGGTACCAAGA  
 AACTATCGGCCAGAGCTACCGATATATTCATTGAAGTCGCAGGATCGATTGTTCAAAAAGAC  
 CTCAAGAATAAGCTGACGAACGTCATTGACAGTCATAATGATGTTGATGTTATTGTTCTGT  
 CGACAATGAATATCGTCAAGCCAAAAGCTCTTTGTCTTTGACATGGATTCAACATTAATCT  
 ACCAAGAGGTCATCGAATTGATGCGCGCTTATGCTGGTGTGAAGAACAAGTGCACGAGATC  
 ACAGAAAGAGCCATGAACAATGAACCTGATTTCAAAGAGTCTTTAAGAGAACGCGTTAAATT  
 ATTGCAAGGCTTCAAAGTCGATACACTATATGATGAAATAAAAACAAAAGCTAGAGGTCACCA  
 AGGGTGTGCCAGAAGTATGCAAGTTCCTTCAAAAAAATTTGCAAGCTCGCTGTTTTAAGC  
 GGTGGTTTTTATTCAGTTTGCCGGTTTTATCAAGGATCAGTTAGGTTTAGATTTTTGTAAGGC

AAACTTGTGGGAAGTTGACACTGATGGAAAATTAACCGGTAAAACACTGGGTCCTATCGTAG  
 ACGGACAGTGCAAGAGTGAAACCCTTCTGCAACTATGTAATGACTACAATGTTCCAGTTGAA  
 GCAAGTTGTATGGTGGGTGACGGTGGTAACGACCTGCCAGCCATGGCTACCGCCGGGTTTGG  
 GATCGCATGGAACGCCAAGCCAAAGGTGCAGAAAGCTGCACCTTGTAAGTTGAATACCAAGA  
 GCATGACTGACATTTTATACATTTCTTGGTTACACCGATGATGAAATATACAATAGACAATGA

>YLR297W 1.69 Hot

ATGGTCAAGGTGATTTTGTGCGATGAGCAATCGAACATTGCCTTACTAAGCTCCAAATCCAT  
 GTGTGGTGATCATCATAGCGTCAAGAATAGCATAGGGGATGAGATCTTTAAATTATTGACAA  
 AGATTTTAAATTCGGATGAGAAAAGCAAGCGGAGATGTGCACACACTCGTTTCTGGGACCCCG  
 GATCTCTCAAATTTTAACTCGATAATGAACCCTGGAAAACATACTCGCTGTTTTTATAAT  
 ATCTTTTATTATTGTAGTGGTTGGAGTTTTACTACTTGGGTTGATTGGCATGATATTCATAT  
 CTCTCCGTTTCAGGCAGCAGTAATGATAAGAACTACAGTCCAACGATGAAGAAAAGCAAGCA  
 CTTGCTGAAAAAGCATGA

>YJL088W 1.89 Hot

ATGTCAACCACAGCATCCACGCCCTTCATCTTTACGTCATTTGATTTCTATAAAAAGATCTTTC  
 TGATGAAGAATTCAGAATCTTAGTACAAAGAGCTCAACATTTCAAGAATGTTTTTAAAGCAA  
 AAAAAACGAATGATTTCCAATCCAACCATCTGAAACTATTGGGTAGAACTATAGCCTTAATA  
 TTTACTAAAAGATCAACTAGAACGAGAATTTTCGACCGAAGGTGCAGCCACCTTCTTTGGTGC  
 CCAACCGATGTTTTTAGGTAAAGAGGATATTCAGCTTGGTGTCAATGAATCATTTTACGATA  
 CCACCAAGGTTGTATCATCTATGGTTTTCATGTATTTTTGCCCGTGTGAACAAACATGAAGAC  
 ATACTTGCTTTTTGCAAGGATTCCTCTGTACCGATCATCAACTCTCTATGTGACAAATTTCCA  
 CCGTTTGAAGCAATTTGTGATCTTTTAAACAATAATCGAAAACCTTCAATATATCTCTAGATG  
 AAGTAAATAAGGGAATCAATTCAAAATTGAAGATGGCATGGATTGGTGTGATGCCAATAATGTC  
 AATAATGATATGTGCATCGCATGTCTGAAATTCGGTATAAGTGTGAGTATTTCCACTCCCC  
 CGGTATTGAAATGGATTCCGATATTGTGCGATGAAGCAAAGAAAGTTGCTGAGAGAAAACGGTG  
 CGACATTTGAATTAACACACGACTCTTTAAAGGCCTCCACCAATGCCAATATATTAGTAACC  
 GATACTTTTCGTTCCATGGGTGAAGAATTTGCGAAACAGGCCAAGCTGAAACAATTCAAAGG  
 TTTTCAAATCAATCAAGAACTTGTCTCTGTGGCTGATCCAAACTACAAATTTATGCATTGTC  
 TGCCAAGACATCAAGAAGAAGTTAGTGATGATGTCTTTTATGGAGAGCATTCATAGTCTTT  
 GAAGAAGCAGAAAACAGATTATATGCAGCTATGTCTGCCATTGATATCTTTGTTAATAATAA  
 AGGTAATTTCAAGGACTTGAAATAA

>YJL069C 1.58 Hot

ATGACAATGGCAACAACCGCAATGAATGTTAGCGTACCTCCACCAGATGAAGAAGAACAGTT  
 ACTAGCCAAATTTGTATTTCGGTGATACAACAGATTTACAAGAAAATCTCGCTAAATTTAATG  
 CCGATTTTCATTTTCAATGAACAAGAAATGGATGTTGAAGACCAGGAGGATGAGGGATCTGAA  
 TCAGATAACAGTGAAGAAGATGAAGCGCAGAACGGTGAATTAGACCATGTTAACAACGATCA  
 GTTATTTTTTGTGGACGATGGTGAACGAAGATAGTCAAGATAAGAATGAAGATACCATGG  
 ACGTGGATGACGAAGATGACTTTCAAGCGATGATTATTCTGAGGACTCTGAAGAAGCTGCT  
 TGGATAGATTCGGATGATGAAAAAATTAAAGTGCCTATTCTTGTACCAATAAGACAAAGAA  
 ATTAAGAACCTCCTATAACGAGTCCAAAATCAACGGTGTTCATTACATCAACAGATTGAGAT  
 CTCAGTTTGAAGAAGATATATCCAAGGCCAAAATGGGTGGACGATGAATCTGATTCTGAATTA  
 GATGACGAAGAAGACGATGAAGAAGAAGGCTCTAATAATGTTATTAATGGAGATATTAATGC  
 TCTAACGAAGATCCTGTCTACTACTTACAATTATAAAGACACTTTATCGAATTTCAAACATAT  
 TACCCCTAAGAACTTGACATTTGTGCGTCTTAAAGATGCAAATGCATCACACCCGCTCAT  
 TCCGCCATAACAATCTCTTTCATTCCATCCTTCTAAGCCTCTACTGTTAACGGGTGGGTATGA  
 TAAGACCTTAAGAATATATCATATTGACGGGAAAACGAACCATCTAGTGACAAGTTTGCACC  
 TGGTTGGGTCTCCAATACAAACATGTACTTTCTATACTTCTCTATCAAACCAAATCAACAA  
 AATATATTCACCGCCGGTAGAAGAAGATATATGCATTCTCTGGGACTTATCCTTAGAAAAATTT  
 AACTCATTACAGACTGCCAAAATCGAAAAATTTTCCAGATTGTATGGACATGAGTCCACTC  
 AAAGATCATTTGAGAATTTCAAAGTTGCACATTTGCAGAAATTCACAAACAAATTTCTGTCCAT  
 GGAATTTGCTCTTTTACAGGGTAATAATGGTTGGATTAACATTTTACATTTCCACTTCCGGACT  
 ATGGTTAATGGGCTGCAAGATAGAAGGTGTGATAACGGATTTCTGTATCGATTATCAACCTA  
 TTTACGTTGGTAAGTTTAGGACCATTTTAAATGCTGTAAACCGGTATGGTGAAGTGTGGGAA  
 TTTGACTTGAATAAGAATGGCCATGTTATAAGAAGATGGAAAGACCAAGGTGGCGTGGGTAT

AACAAAAATCCAAGTTGGTGGTGGGACAACAACACTACTTGTCCGGCTCTTCAAATAAGTAAGA  
 TAAAGCAAAATAGGTGGCTTGCGGTAGGTAGTGAGAGTGGATTTGTTAATCTTTACGATAGA  
 AATAATGCTATGACCTCGTCGACCCCTACACCTGTGCGCCGCTTGGACCAGCTAACAACTAC  
 CATTTCTAATCTACAATTTTCCCCTGATGGTCAAATACTGTGCATGGCATCCCCTGCAGTCA  
 AGGATGCTTTGAGACTAGTTCATCTGCCTTCTTGTAGCGTGTTCAGCAACTGGCCTACCAGC  
 GGGACGCCTTTGGGTAAAGTTACCAGTGTGCGATTTTTCGCCATCTGGTGGGCTACTGGCCGT  
 GGGTAACGAACAAGGTAAAGTGAGGCTCTGGAAATTAACCCTACTACTAA

>YFL068W 1.7 Hot

ATGATGCCTGCTAAACTGCAGCTTGACGTAAGTGCAGTCCAGCGCTCGTCATGG  
 AACGCAAACGCTGAAAACTCCAACCTTCTCGAGCGCTTCCACAAAGACCGTATCGTCTTTT  
 GCCTCCCATTTCTCCCGGCACTTTTTCTCGTCCCAGTTCAAAGTACTGCAGCACCTCTGT  
 CTTGATTCACGCAAGTTGCTCCATACTTTATAATACTACTCTTTGATCTGCCTTCCAGACA  
 TGCGGAAAACCTGGCTCCCTTGCCTTGCCTTGTGCGAATCCAATACACTAATTGTTTCTCTT  
 CTTCTAGTAATGGCCAGGTACCAAGCATAATTTCTCTGTATCTGAGAGTAGATCTCTCCCT  
 TTTTACGCTAAAAAATTTCAAATACCCTACAGGGTCCCCATGATATGGCTCGATGTCTTCCA  
 AGTATTTCTTTGTATTCCTCGTCATTTTCGCAGCATTTCTCTCCACAGCTAG

>YDL169C 1.88 Hot

ATGGAGGATAAGGAGAACTTATTGTATACTCAAATACCAGTTCGGTATTTACATATAGTGC  
 AGAAATAAGGCCAAATTTTAAATATCTGTATCTCAAAGTCAAGTTTTGCCTGGAACCAGG  
 ACTTATTCGCCACACAATACCAACAATCATATAAGGTGGTATATGATGCACACGAGGACAAC  
 TTTGATGAGTTAATTTTGAAGATCAAGGGCAAATTAAGACAAAATCTAATAAAAGAGCTAA  
 AATGAAGTCTAAGACTAAATTAACAAGGACTGCAAAGCAGAGAAGGGAAAAGCCCCGTTTGTG  
 AAAGGGACGAGAGTGACGAGGATAATGATAGTGATCACTACCAAAGAATACAAGTGCTAGAT  
 GGCCATGAATTTCCGAGAGCAAATCGGTATAAATCTGTATGGGCTCATGACGTCCACTCGAA  
 TGAAGATAGTACAAGCGACGGGAAAGCAATCATGATATAGATATGATTGGCGGCACTGGCA  
 CGTCGTATGCAGGAGCAGCCATAATGGATAGGCCACGCAGGAAATCTGAGAGAAGCATAAGC  
 TTTGTGGAGGACTCCAAGACAGCGATTACAGGTATCAAACCGGGCAGGTGGATGTTGTAGA  
 GGTGGACTCGGACACCCCTGAAAATAATCACCTAAAATGGTTAATTAATAA

>YIL054W 1.85 Hot

ATGGCCCCGAAGGCTTTTTTGTCTGTCTTCTTGGGTCTTACCCCGCCACGCGTTAATAGT  
 GAGACAAGCAGGAAATCCGTATCATTTTTCTCGCATAACGAACCCGCGTGCCTGGTAAAT  
 TGCAGGATTCTCATTTGTCCGGTTTTCTTTATGGGAATAATCATCATCACCATTTACTGTT  
 ACTCTTGCATCATCATTAACATAATTTTTTTAAACGCTGTTTGTATGATGGTATGTGCTT  
 TTATTGTTCTTACTCACCTTTCTTTGTGTCTTTTAAATTTTGACCATTTTGACCATTTTG  
 ACCTTTGA

>YAL039C 1.88 Hot

ATGGGTTGGTTTTGGGCAGATCAAAAACTACGGGCAAAGATATTGGTGGGGCAGCAGTATC  
 ATCCATGTCAGGGTGGCCAGTCATGCACGAGTCGTGTCGTGTCGCCACCATCCTCTGAGT  
 GCCCGTTATGCAGGGAGATAACGATAGAATAAACCCGCTGAACAATATGCCGGAGTTGGCA  
 GCATCCAAACAGCTGGCCAAAAGATGGACTTGCCCGTTGATCGGACCATCTCCAGCATCCC  
 CAAGAGTCCAGACAGTAACGAGTTCTGGGAGTATCCTTCTCCACAACAGATGTACAATGCTA  
 TGGTTAGAAAGGGCAAGATTGGCGGTAGCGGCGAAGTCGCCGAAGATGCAGTGGAGTCCATG  
 GTGCAGGTCCACAACCTTTCTAAATGAAGGGTGTGCGCAGGAAGTGTGCGAATGGGAAAACC  
 GCACACAGATGAAAGCCACGTGCAGCCTAAGTTGCTGAAATTCATGGGGAAACCGGGCGTAT  
 TGAGCCCTCGTGTGCTGCGTGGATGCACCTGTGCGGCCTACTGTTTCCGTCCATTTTAGCCAA  
 GAACCTACCATTTCGACAGGCACGACTGGATTGTACTCCGAGGCGAGCGCAAAGCGGAACAACA  
 ACCTCCAACCTTCAAGGAAGTTAGATACGTCTTGGATTTCTACGGAGGGCCCCGACGACGAAA  
 ACGGAATGCCTACTTTCCACGTGGATGTCCGTCTGCCCCTAGATAGTCTAGACAATGCTAAG  
 GACCGGATGACCCGTTTCTTGGACCGGATGATCTCGGGTCCGTCTCTCGTCTCCGCCCC  
 TTAA

>YIL054W 1.85 Hot

ATGGCCCCGAAGGCTTTTTTTGTCTGTCTTCCTTGGGTCTTACCCCGCCACGCGTTAATAGT  
 GAGACAAGCAGGAAATCCGTATCATTTTTCTCGCATAACACGAACCCGCGTGCGCCTGGTAAAT  
 TGCAGGATTCTCATTTGTCCGGTTTTCTTTATGGGAATAATCATCATCACCATTATCACTGTT  
 ACTCTTGCGATCATCATCATTAACATAATTTTTTTAAACGCTGTTTGATGATGGTATGTGCTT  
 TTATTGTTCCCTACTCACCTTTTCCTTTGTGTCTTTTAATTTTGACCATTTTGACCATTTG  
 ACCTTTGA

>YJL189W 1.56 Hot

ATGGCTGCTCAAAAAGTCTTTCAGAATCAAGCAAAAAATGGCTAAGGCTAAGAAGCAAAACAG  
 ACCATTGCCACAATGGATCAGATTGAGAACCAACAACACTATCCGTTACAACGCTAAGAGAA  
 GAAACTGGAGAAGAACCAAGATGAACATCTAA

>YPL223C 1.69 Hot

ATGTCCAATCTATTAAACAAGTTTGCTGATAAGTTGCACGGCAACGATCATGATGAACGTTA  
 CGAAGACGACAATGACGACCAGACTAGACAACAGCGTCATGAAAAACATCAACAGAGGGAAT  
 TCAGGAATCAAGGATCCAAGGCCGATCCCTACGGCGAAGAAAACCAAGGGAATTTCCCTCAA  
 CGCCAGCAGCCACAGTCTAATCTAGGCGGTAACACGCAGTTTGGCGGTAACGACTTCCAGCA  
 ACAAACTACTGACTACACTGCCGGCACTGGTGGTGGCACTTATACCCAACTTACCGCGAAA  
 CTAACACTCAAGGTCAGTTGGACGACGATGAAGACGATGACTTCTTGACTTCGGGCCAACAG  
 CAAAAACAAGGTCGTACAAGAGGTGCTCAAAGTAACCGCTACCAATCCTCTAATATCGGCAG  
 CGGTAGACGCGATCTGTCTGGGTCAGGAAACGATGAATATGATGATGATAGTGGGAACCAAG  
 GCGTCTGGTAG

>YAL044C 2.07 Hot

ATGTTACGCACTACTAGACTATGGACCACCCGCATGCCCACTGTGAGCAAATTTGTTTTGAG  
 AAACAGCTCCGGCAATGCCCTAAACAAGAATAAACTACCATTTTTGTAATCATCCCAAGGAC  
 CTCAAGCCGTGAGGTACACTTCCCAACATGAGTGGATAGCTGTGCATCAGGACAAGACTGCC  
 TTTGTTCGGAATTACAAAATACGCCACTGATGCCCTTAGGGGACGCTACCTATGTTGAGTTGCC  
 AGAAGTGGGCACTGAGATTGCCCAAGGTGAGTCGCTAGGGTCCATTGAGTCCGTCAAGTCAG  
 CCTCCGAGATCTACCAGCCTGCCGATGGTACCCTAGAGGAAATTAACACTAATCTTGAGGAA  
 AATCCAGGTGTGGTGAACGAAGATCCTATGGGTGACGGCTGGCTAGTCAAATGAAGCTTGG  
 TGAGGGCGTTAATGTGGAACAGGTCGAGGGTCTAATGTCTTAGAACAGTACGAAAAGACAC  
 TGGTTCATGATGACTGA

>YCL030C 3.74 Hot

ATGGTTTTGCCGATTCCTACCGTTAATTGATGATCTGGCCTCATGGAATAGTAAGAAGGAATA  
 CGTTTCACTTGTGGTTCAGGTACTTTTTGGATGGCTCGAGCCTGAGTAATGAAGAGATTCCTCC  
 AGTTCCTCAAAGAGGAAGAAGTCCATTGGTGGCTTTGTCTTGCCAAGTGGAATTCAGC  
 GATGATGAAATCATTTGCCCTTCTTGAACAACGAGTTTTCTTCTCTGTTTCATTTGCTAGCCAAGA  
 TGCTAAAACAGCCGAACACTTGGTTGAACAATTTGAATGTACCAAAGGAGCGTGTGTTGTGG  
 AAGAGAACGGTGTTTTTCTCCAATCAATTCATGGTAAAACAAAATTTCTCGCAAGATAAAAATT  
 GTGTCCATAAAGAAATTAAGCAAGGATATGTTGACCAAAGAAGTGCTTGGTGAAGTACGTAC  
 AGACCGTCTGACGGTTTTATATACCACCCTAGTTGTGCGACCAATATGAGCGTTGTCTAGGGT  
 TGGTGTATTCTTCAAGAAATCTATAGCAAAGGCCATCGATTTGGGTCGTGGCGTTTATTAT  
 TCTCGTTCTAGGAATGAAATCTGGATCAAGGGTGAACCTTCTGGCAATGGCCAAAAGCTTTT  
 ACAATCTCTACTGACTGTGATTCGGATGCCTTAAAGTTTATCGTTGAACAAGAAAACGTTG  
 GATTTTGCCACTTGGAGACCATGTCCTTGCTTTGGTGAATTCAAGCATGGTTTGGTGGGGCTA  
 GAATCTTTACTAAAACAAAGGCTACAGGACGCTCCAGAGGAATCTTATACTAGAAGACTATT  
 CAACGACTCTGCATTTGTTAGATGCCAAGATCAAGGAAGAAGCTGAAGAACGACTGAGGCCAA  
 AGGGTAAGAAGGAGCTTTCTTGGGAGGCTGCCGATTTGTCTACTTTGCACTGGCCAAAATTA  
 GTGGCCAACGATGTTTCATTGAAGGACGTCGAGAATAATCTGAATATGAAGCATCTGAAGGT  
 TACAAGACGGAAAGGTGATGCTAAGCCAAAGTTTGTGGACAACCAAAGGCTGAAGAAGAAA  
 AACTGACCGGTCCAATTCACTTGGACGTGGTGAAGGCTTCCGACAAAGTTGGTGTGCAGAAG  
 GCTTTGAGCAGACCAATCCAAAAGACTTCTGAAATTATGCATTTAGTCAATCCGATCATCGA  
 AAATGTTAGAGACAAAGGTAACCTCTGCCCTTTGGAGTACACAGAAAAGTTTGATGGTGTAA  
 AATTATCCAATCCTGTTCTTAATGCTCCATCCCAGAAGAATACTTTGAAGGTTTAAACCGAG  
 GAAATGAAGGAAGCTTTGGACCTTTCAATTGAAAACGTCCGCAAATTCATGCTGCTCAATT

GCCAACAGAGACTCTTGAAGTTGAAACCCAACCTGGTGTCTTGTGTTCCAGATTCCCTCGTC  
 CTATTGAAAAAGTTGGTTTTGTATATCCCTGGTGGCACTGCCATTTTACCAAGTACTGCATTA  
 ATGCTTGGTGTTCAGCACAAAGTTGCCCAATGTAAGGAGATTGTGTTTGCATCTCCACCAAG  
 AAAATCTGATGGTAAAGTTTCACCCGAAGTTGTTTTATGTCGCAGAAAAAGTTGGCGCTTCCA  
 AGATTGTTCTAGCTGGTGGTGCCCAAGCCGTTGCTGCTATGGCTTACGGGACAGAACTATT  
 CCTAAAGTGGATAAGATCTTGGGTCCAGGTAATCAATTTGTGACTGCCGCCAAAATGTATGT  
 TCAAAATGACACTCAAGCTCTATGTTCCATTGATATGCCAGCTGGCCCAAGTGAAGTTTTGG  
 TTATTGCCGATGAAGATGCCGATGTGGATTTTGTGCAAGTGATTTGCTATCGCAAGCTGAA  
 CACGGTATTGACTCCCAAGTTATCCTTGTGGTGTAACTTGAGCGAAAAGAAAATTCAGA  
 GATTCAGATGCTGTCCACAATCAAGCTTTACAACCTGCCACGTGTGGATATTGTTTCGTAAAT  
 GTATTGCTCACAGTACGATCGTTCTTTGTGACGGTTACGAAGAAGCCCTTGAATGTCCAAC  
 CAATATGCACCAGAACATTTGATTCTACAAAATCGCCAATGCTAACGATTATGTTAAATTTGGT  
 TGACAATGCAGGGTCCGTATTTGTGGGTGCTTACACTCCAGAATCGTGCGGTACTATTCAA  
 GTGGTACTAACCATACATTACCAACCTATGGTTACGCTAGGCAGTACAGTGGTGCCAACACT  
 GCAACCTTCCAAAAGTTTATCACTGCCCAAAACATTACCCCTGAAGGTTTAGAAAACATCGG  
 TAGAGCTGTTATGTGCGTTGCCAAGAAGGAGGGTCTAGACGGTCACAGAAACGCTGTGAAAA  
 TCAGAATGAGTAAGCTTGGGTGATCCCAAAGGATTTCCAGTAG

>YER158C 1.82 Hot

ATGTTACAGCAGGGTCTTCTCGAGGAGGAGTTTGCATGGTAATGATTTTCACACGCTCAC  
 TTCTCCTTCAAGGAGAGACTCTTTGAGTATTCCTAGGGCTGTGGACGCTAGATCTGCGTCTA  
 CGATTGATCTGTTCTACATAACGGATGCTACCGTCTCAAGGAGGCACTCTACTCTGGTGGCT  
 AATAGATCAGACAATAATGGTAATGGCGCACCGATGCGCCAGTACAATAAACCTAACTTTGC  
 TTCTCCTCGACTTCATCTCTGCCTTCAACTAGAAATCGCCCTCTCGCTACGATAACATGA  
 ATATGAATATGAATATGAATATGAACATGAACATGAACATGAACATGAACAACCAT  
 ACTACCAGTGATCACAATGCGCACCCGCAATATCGTTGTAGACCAAACCCGTCCAGACGCCA  
 CTCTTAATGACCATTCCCGAAAAGTACTCTGGTAGTTCGCTACAGTCTCCGATCATCCCCGC  
 CTACCTATTCTAATCCACGTGTTAGGAAGGAACCTTACTCCTTTCCAATTACAAAGAAAGCAG  
 ATGAAAAGCGCTTTTCAATTCCTCAACGGTGAATAATTCACGCCAAGAAACCAGATAGCAAG  
 GCTTCGCCCATCTTCGACTTTTCCCGACTCTCCTTCTAGTTCATCGTTGCCTTTTGACCCAGA  
 CTGGAGGCCCATCTTCCGCAGATAACGATTCCATTGCCACTGGCACGAACAATCGTTCTCCT  
 CAACAAACGAAAGCTGCTGATGCTAATCAGAAATCTGAATCCGAGTCTCCAAAGGCAATTAG  
 ATCAAATTTCTAAAAAGATATCTCGTTTTCTCAGGAAAATCTGGTTCGTTCAAGTTCATCAAAT  
 CTGCAGATTCCGTAGAAGAGAATAGCAAAAACAAGCAGAAAAGGAAAAATCCGGAGAGAGTT  
 GTACCAGAACCGATAACGTCCCTTGACCAACCGGTTGAAATTTATAAAACAGAGTTTTTCAAC  
 CGTTAACAATCACGAAACGGCTGTACCTCAATTAAGGACTCTGGCATAGTACAAGAATTGA  
 CAGCACTCGGAGATAATAACAGGATACCAGTTCTTCCACCCCTAGGTCACCAACAGACCT  
 ACACTGTCTGATAAACGAACTACAAAGTTATACTACTGTAGTCAAGATTCGTCTAATGAAGA  
 TATTGCTCCAGAGGAAAAGAGCACCGTTTTCTTAAAGCGTTTGCAGGATGAATGGTCTACCG  
 TGTATTTAAACAATTTGCCCTTTGACTGCTTCTGTGCCATCTTCTCTCTTACCCTACTGAT  
 GCTGCGAACTCTTCGTTTATAAATCTTCAATATCATCGCCGGCTCCTTCTTCTCGTCCCTC  
 GTCATCGTTGGTTTTCCCGTGGACCAATGCAATCCATATCTTCTCGCCAACACCTGCCCTT  
 CTTACGGGTTCATCGAAATCTAAAAATGCCGTCAAATCCTTACGCTTTGCGGATGAGATTTAT  
 GTAAACGATACGTGGTCCGCCGCGGACTATTGCAGGTGTGATAATACCTTTTTGAATAATTT  
 CTTTAAAGGAAAAGAGCCAAGACATTACCAATCCTTCTACTTTTGTGCGTAATAATCTCTCAT  
 CCACAAAAAATATATCCAATATTGAAATCAAAATGGAGGTGAATGAGTTCAAAGAAAGGAA  
 ATGCGCGTTACCAGGATAGCGCTAAGTATACACATTACTACTTATAA

>YHL025W 1.81 Hot

ATGGGTGTCATCAAGAAGAAAAGATCGCACCATGGAAAGGCTTCGCGCCAACAATACTACTC  
 TGGGGTACAGGTTGGGGGAGTAGGCAGCATGGGCGCCATAAACAATAACATCCCGTCTTGA  
 CGAGCTTCGCGGAGGAAAACAACATCAGTACGGATACAGCGGCTCCAGTCCGGGCATGAAT  
 GGCAGATCGCTTACGTACGCGCAGCAACAGCTTAATAAGCAAAGACAGGACTTCGAACGTGT  
 ACGACTTAGACCAGAACAGCTCAGCAATATCATAACATGACGAGAGCGACACGATATCGTTCC  
 GATCCAACCTTTTGAAGAACTTTATAAGCTCGAACGACGCATTTAACATGCTGAGTTTGACC  
 ACGGTACCGTGCAGACAGAAATGAGAAGTCCAGATTGTTTCAGTGAAAAACAATAAGATATCT  
 CATGCAAAAACAACAGAAATGAAAACACAAGCGGCAGAGTTGCAAGAAAAGCCTCTGACGC

CACTTAAATACACAAAACCTTATAGCTGCGGCAGAGGACGGAAGCCGTAGCACAAAGGATATG  
 ATAGATGCTGTCTTCGAGCAAGATAGTCATTTGAGGTACCAGCCGGACGGCGTGGTCTGAC  
 TCGTGACGATCCTGCGCTGGTGGGTAAACTCCGCGGAGATCTCCGCGAAGCGCCGGCGACT  
 ACTGGACGCATGCTTATAGGGATGTTTTGGCGCAATACCACGAGGCCAAGGAGCGTATCAGG  
 CAGAAGGAAGTAACTGCAGGTGAAGCACAGGACGAAGCCAGCTTGCAGCAGCAACAGCAGCA  
 AGATTTGCAGCAACAGCAACAAGTAGTGACTACAGTTGCCTCGCAAAGTCCTCATGCAACTG  
 CAACGGAAAAGGAGCCAGTACCCGCCGTGGTTGACGACCCACTGGAGAACATGTTCCGGAGAT  
 TATCCAATGAGCCGTTCAACACCAATTTTCGACGATGAATTTGGAGATCTTGATGCTGTATT  
 TTTTAA

>YJL134W 1.72 Hot

ATGGTAGATGGACTGAATACCTCGAACATTAGGAAAAGAGCCAGGACTCTCTCTAACCCCAA  
 TGACTTTCAAGAGCCTAATTACTTGGCTGGATCCCGGTAATCATCCCTCAGATCATTTTCGAA  
 CTCGAATGTCCAAATTTCCGGTTAATATTAGAGAGAAGCTGTTAGTGTTTACCAACAATCAA  
 TCATTCACATTAAGCCGCTGGCAAAGAAGTACCGTTCTGCGTTAATGATCTCTACTTTAC  
 TTATACTTCCTTAATGGGATCGCATACTTCTATGTTCTGTGTTTACCTATGCCCGTGTGGT  
 TTGGATATTTTGAACAACAAAAGATATGGTTTATATCTTGGGATATTCTATCTACTTGAGT  
 GGTTTTTTTTAAAGATTACTGGTGCTTGGCCAGGCCTAGAGCACCTCCATTACATCGAATTAC  
 GTTAAGTGAATATACAACGAAGGAATATGGTGCTCCAAGCTCCATACAGCAAATGCAACAG  
 GAGTGAGTCTCTTGTCTCTACAACATCTGGAGGATGCAAGAATCTTCTGTGATGGTCCAA  
 CTATTGTTGTGATGTGTGGTTTTATTTTATTATATGACTTTGGTTTTCCGGTAGAATATACTG  
 TGGGATGCATGGCATATTAGATTTAGTAAGCGGTGGGCTCATTGGAATAGTGTGTTTCATTG  
 TTAGGATGATTTCAAGTACAGTTTTCCGGTTTTACGCATTGAGGAGCATTGGTGGTTTTCCCT  
 TTGTTTAGTGTGGGATGGGGTCTTCTTCTTTTGTTTAAACATGTTAAGCCCGTAGACGAATG  
 TCCTTGCTTCCAAGATAGTGTGCGTTCATGGGCGTTGTGTCAGGTATTGAATGCTGTGATT  
 GGTGGGCAAAGTGTGGAGTCACCCTGGTGTACAATTTGGAACCTAACTGTGGCTGGCGG  
 TTAACCTTAGCCAGGCTGCTGGTGGGCTACCGTGCCTTGTATCTGGAAGTACGTGATCAG  
 CAAACCGATGATCTACACGTTATTGATCAAAGTTTTCCATCTGAAGGATGACAGAAACGTTG  
 CGGCAAGAAAAGACTGGAGGCCACGCACAAAGAAGGTGCAAGCAAGTACGAATGTCCATTA  
 TATATTGGAGAGCCCAAGATTGACATTCTAGGTAGATTTATTATCTATGCTGGCGTTCCATT  
 CACCGTTGTAATGTGCAGCCCCGTCTATTTCCCTCTTAAATATAGCATAA

>YGR159C 1.69 Hot

ATGGCTAAGACTACTAAAGTAAAAGGTAACAAGAAGGAAGTTAAGGCTTCCAAACAAGCCAA  
 AGAAGAAAAGCTAAGGCCGTCTCTTCCCTCCTCCGAATCTTCATCCTCATCTTCATCTT  
 CATCTGAATCTGAATCTGAGTCTGAGTCTGAATCTGAATCTTCATCTTCATCTTCATCCTCT  
 GATCTGAATCCTCTTCTTCATCGTCTTCTGACAGCGAAAGTGAAGCTGAAACCAAGAAGGA  
 AGAATCCAAGGATTCCTCTTCTTCTTCTGACTCTTCTTCCGACGAAGAAGAAGAAG  
 AAAAGAAGAACAAGAAGGAAGAATCAAAGAATCTTCTAGCTCTGATTCATCCTCATCT  
 TCATCTTCTGATAGCGAAAGCGAAAAGGAAGAGTCTAACGATAAGAAACGTAATCTGAGGA  
 CGCCGAAGAAGAAGACGAAGAGTCTTCCAACAAGAAGCAAAAAATGAAGAAACCGAAG  
 AACCAGCTACTATTTTCGTTGGTAGACTATCGTGGTCTATTGATGACGAATGGTTGAAGAAG  
 GAATTCGAACACATCGGTGGTGTGATTGGTGCCAGAGTTATTTATGAAAGAGGTACCGATAG  
 ATCTCGTGGTTATGGTTACGTTGATTTTGAACAACAATCTTATGCTGAAAAGGCCATTCAAG  
 AAATGCAAGGTAAGGAAATTGATGGTAGACCAATCAACTGTGATATGTCCACAAGCAAGCCA  
 GCTGGTAACAACGATCGTGCCAAGAAATTCGGTGATACCCCATCTGAACCATCTGACACTTT  
 GTTCTTGGGTAACCTTATCTTTCAATGCTGACAGAGACGCTATTTTTCGAATTATTCGCTAAC  
 ACGGTGAAGTTGTTCCGTCCGTATCCCAACACATCCAGAACTGAACAACCAAAAGGTTTC  
 GGTATGTTCAATCTCCAACATGGAGGACGCCAAGAAGGCTCTAGACGCTTTACAAGGTGA  
 ATACATTGACAACAGACCAGTTAGATTAGACTTCTTCTTCCAAGACCAACAACGATGGTG  
 GTCGTGGCGGTAGCCGTGGTTTTGGTGGTGGTGGCGGTGGTGGTGGCGGTAACCGTGGATT  
 GGTGGTGGTGGTGGCGCTCGCGGTGGCGGTGGCGGTTTTCAGACCATCTGGTTCTGGTGTAA  
 TACTGCTCCATTGGGCAGATCAAGAAATACCGCTTCTTTCGCTGGTTCAAAGAAAACATTTG  
 ATTA

>YEL037C 1.54 Hot

ATGGTTAGCTTAACCTTTAAAAATTTCAAGAAGGAAAAAGTTCCTTTAGATCTGGAACCTTC  
 AAACACAATTTTAGAGACCAAGACCAAGCTTGCTCAATCCATTTCTTGTGAAGAATCTCAA  
 TAAACTGATCTACTCGGGTAAAGTGCTACAAGATTCCAAAACCGTATCGGAATGCGGGCTA  
 AAAGATGGGGACCAAGTTGTCTTCATGGTTTCTCAAAAAAGTCCACGAAGACCAAAGTAAC  
 AGAACCTCCAATTGCTCCTGAGAGCGCCACTACCCCGGAAGAGAAAAATCTACAGAAGCAT  
 CCCCAGTACGGATGCTTCTGCAGCTCCTGCAGCCACTGCTCCCGAAGGCTCACAACCGCAA  
 GAAGAACAAACCGCCACTACAGAACGTACTGAATCTGCCTCTACACCGGGATTCGTGGTGGG  
 AACCGAGAGGAACGAGACCATCGAGAGAATCATGGAAATGGGCTACCAAAGAGAGGAAGTCG  
 AACGAGCCTTGAGAGCAGCCTTTAATAATCCAGATAGAGCGGTGGAATATCTACTGATGGGT  
 ATTCCAGAAAATCTGCGTCAACCGGAACCACAGCAACAAACAGCCGCCGAGCGGAACAACC  
 ATCGACAGCCGCCACCCTGCGGAACAACCGGCTGAAGACGACTTATTTGCACAAGCTGCC  
 AAGCGGTAATGCTTCATCCGGTGCCTTGGCACAACCTGGAGGAGCTACAGATGCTGCGCAA  
 GGTGGACCTCCAGGTTCCATTGGCCTCACTGTAGAAGATTTACTATCGTTGAGACAGGTCGT  
 TTCAGGTAACCCAGAAGCTTTAGCCCCATTGTTGGAAAAACATAAGTGCTAGATATCCTCAAT  
 TACGTGAACATATCATGGCAAACCCAGAAGTGTGTTGTGTCCATGTTGCTAGAAGCCGTGGGT  
 GACAATATGCAAGATGTTATGGAAGGTGCGGATGATATGGTGAAGGAGAGGATATAGAAGT  
 TACAGGAGAGGCTGCTGCTGCAGGACTGGGACAAGGTGAAGGTGAAGGTTCTTTCCAAGTTG  
 ACTATACCCCGAAGACGATCAAGCTATTTGCGCCTCTGTGAATTGGGCTTTGAAAAGAGAT  
 CTTGTTATCCAGGTGTATTTTGCCTGCGATAAAAACGAAGAAGCTGCAGCAAATATCTATT  
 CAGCGATCATGCCGACTGA

>YPL068C 1.66 Hot

ATGCATATGCAACTCAGGAAAAAGAAAAAGGGTTGACTATTCAGGGAGAAAATCAGACGTCGGA  
 TCCCTCCTTCAACCACAACGGCAGCGGTACCATCCATTATTGTCCCTAAGAAGCGTAAAGTAG  
 TCGCACAAAACATGGTTAGTCCAGCTATTCGAGCCACAACCACAACACTGGGCACCTCAAAT  
 ATAATAATACCTAAGCCTCTGCAGCGCCCTAAATTCACAATAGCGCCAGCCTATCTTCACC  
 TGATGATGATCCCGAAAAGATCTCTGTATTGGAAGTTCAGAAAAATTTGTCCAATCTCATCA  
 AAAGACAACAAAGATTATTTTATAAAGATATACATAAGCCGACTCTCGCCGGCTTGAAAAAT  
 TTCGAAATGTTAAGGCTGCCCAATGATCTAAAACCTCTACAAAACATCGTAAACCTATTATA  
 TTCATTCGAGCAATTAACAGTGACTCGAAGACAAGACCAGTCACTACTTCCAAATTAAGG  
 CCTCCTCTCAAGCGCACTCAGACAAATTTGAAAAAATGCTAGCTGAGAGGAAACCTCCATTT  
 AGCCACCCAGTCACAGCGGCACCTGCCTACCACAATGACATCATCCATGAGATAGCGAATTT  
 GCATTCTATTAACCTGGTAGATTTGATTAATTTGGAAGTATATAATAACAATTGCCATACAA  
 ACAACACAGCGTTGCAAACCTACGGCGAATTCGCTGACACTTAATAGCATTATCAAAAAGCTT  
 GACAAGCCAATACTGAAAGAAAGAAATAATTTCTCTGGTATGGCCCATAAAAGCAGATTTAA  
 AGCAAAAAGGAACCAACCTTCGCCTGGCCAATCTTTAATTAACAATACAGATATAACTCTCT  
 ACAACGATGTATAG

>YEL059W 1.85 Hot

ATGAGTCTTTCTTTCTCCTTCTCTTTTCCCCTTTTCTCCCCCCTGTTTCTCGTCCATCTCTAT  
 CTGCTATCTGTCTTATCTACTGTTAGTTTTTTTTTTCGCTTTCACGATACCGCATTACGTAC  
 TGCGCTGCGGAAGTGTGGATGAGTGGCATATACACTCTTCTGCAGAGGATTTTCGTACACAA  
 CGGTGTGTGTGTGCTGTGAAGCTGTCTGCTTCCTTACTTGGCTGTTTGCTTGCTTGTGCGTC  
 ATGGTCACTTTTGTAGAAAGTGAGCCGCATAAAATGGCATGTCGGCACAGCCTACAGTTAA

>YGR177C 5 Hot

ATGGAAGATATAGAAGGATACGAACCACATATCACTCAAGAGTTGATAGACCGTGGCCATGC  
 AAGACGTATGGGCCACTTGGAACCTACTTTGCTGTTTTTGAGTAGGCAGAAAATGTACTCGA  
 ATTTTACTGTTTACGCGGAATTGAATAAAGGTGTTAATAAGAGACAACCTAATGCTTGTCTTG  
 AAAGTATTACTTCAAAAATACTCAACTCTTGCGCATACAATCATTCCCTAAGCATTATCCTCA  
 TCATGAAGCGTACTACTTAGCGAAGAGTACCTTAGTAAACCTTTTCCACAGCATGATTTCA  
 TAAAGGTGATTTCTCATCTTGAATTCGATGACTTGATTATGAATAATCAACCAGAATACAGA  
 GAAGTCATGGAGAAAATCTCAGAACAGTTCAAAAAGGATGATTTCAAAGTCACCAATAGGTT  
 AATCGAATTGATTAGCCCTGTAATCATACTCTGGGTAATCCGAAGAGGCCTAATTGGAGAT  
 TGATTTGTTTACCAGGTAAGGATACTGATGGGTTTGAACGTGGAAAAACTTCGTTTATGTC  
 ACTAACCACTGCGGCTCCGACGGTGTGAGTGGATCGAATTTTTTCAAAGATTTAGCTCTACT  
 CTTTTGTAAAATCGAAGAAAAAGGGTTTGTATTATGATGAAGAGTTCATCGAAGATCAAGTCA

TCATTGACTATGATCGAGACTACACTGAAATTTCTAAATTGCCAAAACCGATTACGGATCGT  
 ATTGACTACAAGCCAGCATTGACTTCATTACCCAAATTTCTTTTAAACAACCTTCATTTATGA  
 ACATTGTAATTTTAAAACCTCCAGCGAATCTACACTTACAGCTAGATATAGCCCCTCTAGTA  
 ATGCTAATGCTAGTTACAATTACTTGTTCATTTTCAGTACTAAGCAAGTAGAACAAATCAGA  
 GCTCAGATCAAGAAAAATGTTACAGATGGGTGCACCCTAACACCCTTCATTCGAAGCGTGCTT  
 TCTTGTAGCCCTGTATAGACTGGATAAGCTGTTACAAAAATCTCTTCTCGAGTATGGGTTCG  
 ATGTGGCTATTCCAAGCAACGCAAGAAGGTTTTTACCAAACGATGAAGAGTTAAGAGATTCT  
 TATAAATACGGCTCCAACGTTGGAGGTTTCGCATTACGCCTATCTAATCTCCTCATTTCGACAT  
 TCCCGAAGGTGACAATGACAAGTTTTGGAGTCTTGTGGAATACTACTATGACCGCTTTTTAG  
 AATCGTACGACAACGGTGACCATTGATTGGTCTGGGGTCCCTACAACCTGATTTTATCGTT  
 GAAAACAAGAATATAGACAGCCTTCTTGCCAACTCTTATTTGCACCAGCAAAGAGGCGGTGC  
 AATCATCAGTAATACAGGACTTGTCTCGCAAGATACGACCAAGCCGTAACGTTTCGGGATT  
 TAATCTTCTCGCAGTCTGCAGGCGCTTGAGATTTGCGTTCGGCCTAAACGTTTGCTCCACA  
 AACGTGAATGGTATGAACATGGACATGAGCGTGGTTCAGGGCACTCTACGGGATCGTGGCGA  
 ATGGGAATCGTTCTGCAAGCTCTTCTACCAAACCATCGGCGAATTTGCGTTCGCTTTAA

>YLR416C 1.53 Hot

ATGAAACATGTGAAACCCTTTTTCTCTTTCGTTGATCCTAAAAAAGCGCGTCTGGAAAACA  
 AGGCGAAGCTTCTCACATGGAAAAGGCTTCTTAATATGTCGCTACGCCTCATTCCCATTGC  
 ATACAGAAAGCAAAGTAGTGCGTTTTTGCGAACGTCACAGATCAAAGTTTGGCCATGCATTG  
 TCATTCTTTTTTTCTTACATACACTGCACCAGACATGTCGGTTCGCCCCGCTAACGGTTAG  
 TCAGCCACACATTGACGTACACTGTGAACAGCCTATTTCTTCCATGTATCTCAGTGCCAG  
 CTTATGAGAACTGTCACAGCCTCCCACTTGACCCTCAGAGCCCTCTCCACTCCCCCCTCTT  
 TCAACATCGCCAGATAGCCCGCTTGA

>YGR176W 5.88 Hot

ATGCATCGACTACGAGCGTATTGTGTTATATCAGCTCTGTCCGATACACTGCTTGCCTTTTG  
 TACGAGCTCGGCCGAGCTATACGAAGGCCCTACGGCAGTATCGCATTAAGCGACGCAA  
 TTCGCCGATGGTTTTGGTAGAAGAGCTTGCAGAACGATTCCCATTCGCCACGATCCCGTAGAG  
 TGCCCTGAACCACGCTCATGTCCATGTTTACATACCATTACGTTTTGTGGAGCAAACGTTTAGG  
 CCGAACGCAAATCTCAAGGCGCCTGCAGACTGCGAGAAGATTAAATCCCGAACGTAGTACGG  
 CTTGGTTCGTATCTTGCAGACAAAGTCTGTATTACTGA

>YJR022W 1.64 Hot

ATGTCAGCCACCTTGAAAGACTACTTAAATAAAAGAGTTGTTATAATCAAAGTTGACGGCGA  
 ATGCCTCATAGCAAGCCTAAACGGCTTCGACAAAAATACTAATCTATTCATAACCAATGTTT  
 TCAACCGCATAAAGCAAGGAATTCATCTGCAAGGCACAGTTACTTCGAGGCAGCGAGATTGCT  
 CTTGTTGGCCTCATAGATGCAGAAAATGATGACAGTCTAGCTCCTATAGACGAAAAGAAGGT  
 CCCAATGCTAAAGGACACCAAGAATAAAATCGAAAATGAGCATGTAATATGGGAAAAAGTGT  
 ACGAATCAAAGACAAAATAA

>YER152C 2.22 Hot

ATGAAATACAAGGAAATCAATTTCTTCAAGGGCCATCCGAGCTCGAGGTTGCTGCCTCGAGA  
 AGCAGTAATTCAGCGACTGCGGCTATATTGGGGCCCGAGACCAGGGAGTACGATAACGACC  
 CCTATAACAGGCATCCGCTGACGTACGGTTCGGACGAAGGTGCCCTGTGGGTGCGAGAGCAG  
 ATTTGTACGTTTTCTGAATGATCAGCTGTTTAAAGTTCGAAAATGGGGCTCGGAGCAGGACAG  
 GGCAGACTATTTGAATCTGAATAGCGGCGCTTCGTATGGCATGCTGAACATCCTTCTGCAA  
 CAACCTTGCCACATAACGGGTATACCAGGCAGGCGTTCATCATCACGCCAACATATTTCTTG  
 ATCAACAATTTGCTTCACAGATGCGGGATTCAAGGGGAAAATGACCGCCATCAACGAGCAGGG  
 CCACGACTCGATTGATTTTCAGTCTGTTGATTTCTGCCCTTGAGCAGCACGAGGCGGAGCCGC  
 AGCCCCATAGTACCACAGAGATGATTCAGGGGCCAAAGTTGACCAAGAAGGTCTACAGGTAC  
 GTTATGTACTGCATCCCAGCTTTGCAAACCCATCGGGAAACACATACTCGCTTGAGACCAG  
 ACGCAGACTTATCGACATCGCTCGGAAGTACGACATGCTGATAATCACTGATGACGTGTACG  
 ATATTCTAGATTACACGACGCCCTCAGATGAGCTGCCCTCTCCGCCCTAAGGATGGTGCAC  
 ATAGACAGAAGTACAGCGCCCTCCGGTGAGGACTCGTTTCGGGAATACAGTGTCCAACGCAAC  
 TTTCTCCAAGCTGATCGCCCTGGGCTCAGATTTGGATAACCATGAGTCAATCAACGCGAATC  
 TCGCCAGACAGCTATCTAAAGGTGGTGCAAACGTCTCTGGCGGAACTCCCTCACAACCTGAAC



TCCATGATCGTGGGTGAGATGCTGCGTAGTGGTGCCGCCAGAGATGCATTGCACATCTGAG  
 ATCCGTATACTCCGAGAGGGCCACTGTCTTGACCTCGGCGCTTAAGAAATACATGCCCTAG  
 GAACCGAGATTATGCCATTGAAGGGCGGCTATTTTACTTGGATCACTCTCCCACCAGCGTAC  
 AATGCCATGGAGATATCCACTATTCTTGCCAAGAAATTTAATGTCATCCTTGCCGACGGCTC  
 CAATTTGAGGTCATCGGCGATGAGAAAACTGGGGTCAGTCATGCTTTAGGCTTTCTATTA  
 GTTCTTAGAAGTTGATGATATCGACAGGGCATTGAGCTGTTTGGTGCTGTTTGCAAATCT  
 CATGCGATCACCAATAACATAACTATGTAG

>YAL060W 1.54 Hot

ATGAGAGCTTTGGCATATTTCAAGAAGGGTGATATTCACCTCACTAATGATATCCCTAGGCC  
 AGAAATCCAAACCGACGATGAGGTTATTATCGACGTCTCTTGGTGTGGGATTTGTGGCTCGG  
 ATCTTCACGAGTACTTGGATGGTCCAATCTTCATGCCTAAAGATGGAGAGTGCCATAAATTA  
 TCCAACGCTGCTTTACCTCTGGCAATGGGCCATGAGATGTCAGGAATTGTTTCCAAGGTTGG  
 TCTTAAAGTGACAAAGGTGAAGGTTGGCGACCACGTGGTCGTTGATGCTGCCAGCAGTTGTG  
 CGGACCTGCATTGCTGGCCACACTCCAAATTTTACAATTCCAACCATGTGATGCTTGTGAG  
 AGGGGCAGTGAAAATCTATGTACCCACGCCGTTTGTAGGACTAGGTGTGATCAGTGGTGG  
 CTTTGTGTAACAAGTCGTAGTCTCTCAACATCACATTATCCCGGTTCCAAGGAAATTCCTC  
 TAGATGTGGCTGCTTTAGTTGAGCCTCTTCTGTACCTGGCATGCTGTTAAGATTTCTGGT  
 TTCAAAAAGGCAGTTTCCGCTTGGTTCTTGGTGCAGGTCCATTGGGTTGTGTACCATTTT  
 GGTACTTAAGGGAATGGGGCTAGTAAAATTTAGTGTCTGAAATTGCAGAGAGAAGAATAG  
 AAATGGCCAAGAACTGGGCGTTGAGGTGTTCAATCCCTCCAAGCACGGTCATAAATCTATA  
 GAGATACTACGTGGTTTTGACCAAGAGCCATGATGGGTTTGATTACAGTTATGATTGTTCTGG  
 TATTCAGTTACTTTCGAAACCTCTTTGAAAGCATTAACATTCAGGGGACAGCCACCAACA  
 TTGCAGTTTGGGGTCCAAAACCTGTCCCATTCCAACCAATGGATGTGACTCTCCAAGAGAAA  
 GTTATGACTGGTTCGATCGGCTATGTTGTCGAAGCCTTCGAAGAAGTTGTTTCGTGCCATCCA  
 CAACGGAGACATCGCCATGGAAGATTGTAAGCAACTAATCACTGGTAAGCAAAGGATTGAGG  
 ACGGTTGGGAAAAGGGATTCCAAGAGTTGATGGATCACAAGGAATCCAACGTTAAGATTCTA  
 TTGACGCCTAACCAATCACGGTGAATGAAGTAA

>YFL032W 1.79 Hot

ATGAGGGTTGTAAGGCAAAGTGGCTCAGCATTAAGTAGGGCTAAAAAGAGTCGCAAATATAC  
 ATCGTACCGAGTGATGAACGTGGTTTTTGAACACCTTGTCTCTTTTTGTTCTCGCTCCCTACA  
 TTCACTATATATTAGAAGAAATTTACCTCAATGGACAACCTCGAGAAATGAATACAGAAATA  
 TGTTTTTTAGCGAAATTTTCTTCTTCTTGTCTTCTTGTTTTTATTTAACTTCCAAGCCTT  
 TAACTCAGTGTCAAACATAACAACCTCCTCCTCCCCACCTACGACAACAACCGCCACTATG  
 GAAATGACTGA

>YDL085W 1.54 Hot

ATGCTGCCAGACTTGGTTTTGCGAGGACTGCTAGGTCCATACACCGTTTTCAAGATGACCCA  
 GATCTCTAAACCTTTTTTCCATTCCACTGAAGTTGGTAAGCCCGGACCACAGCAGAAGCTAT  
 CGAAATCTTACACTGCGGTATTCAAGAAATGTTTTGTCAGAGGTTTAAAGTTAACCTTTTAC  
 ACGACGTTGGCCGGCACATTGTATGTGTACATACGAGCTGTACAAAGAATCGAACCCACCCAA  
 ACAGGTTCCCAAATCGACCCTTTTGTCTAATGGTTTTGAAAAGAAGGAGCTGGTTATTTGG  
 GTACAGGCTGGGGCGCCATATCTTTTTGAAGAAATTAGACACGTCTTTGTATAACGTGACC  
 GTGGTGTGCGCAAGAAGCTTCTTTTTGTTTACACCGTTATTACCCTCAACGCCTGTGGGTAC  
 GATAGAGATGAAGTCTATTGTGCAACCGGTTAGATCGATCGCTAGAAGAACGCCTGGAGAAG  
 TTCACTACATTGAGGCGGAAGCGTTGGACGTTGATCCAAAGGCCAAAAAGTAATGGTGCAA  
 TCGGTGTCAGAGGACGAATATTCGTTTTGAGCTTAAGTTACGATTATCTTGTGTTAGTGT  
 AGGCGCTAAAACCACTACTTTTAAACATTTCCCGGGTCTATGGCAATGCTAACTTCTTGAAG  
 AGATTGAAGATGCTCAAAATATTCGTATGAAGTTAATGAAAACCATAGAACAGGCAAGTTCA  
 TTTCTGTGAACGATCCGGAAAGGAAGCGATTATTAACGTTCTGTTGGTTGTTGGAGGGGGCCC  
 TACGGGGGTTGAATTTGCCGCCGAAGTCAAGATTACATCAATCAAGATTTGAGGAAGTGGGA  
 TGCCCGACTTAAGTAAAGAAATGAAGGTTATCTTAATTGAAGCCCTGCCAATATCCTAAAC  
 ATGTTTCGATAAGACGTTGATCAAGTATGCCGAGGACCTTTTTGCCAGAGATGAAATTGACTT  
 GCAAGTGAATACTGCCGTGAAAGTCGTAGAGCCAACCTATATACGCACTCTGCAAAACGGCC  
 AAACAAACACGGATATCGAATACGGGATGCTGGTTTTGGGCCACGGGAAATGAACCAATCGAT  
 TTTTCAAAGACACTGATGAGTAGAATACCGGAGCAAATAATAGGCGTGGTCTGTTAATTA

TGACAAGTTGGAGCTTCTCGGTTCTGAGAATTCGATTTATGCAATTGGTGATTGTACCGCAC  
 ACACGGGTTTTCTTTCCCACGGCACAAGTTGCACATCAGGAAGGCGAATACTTGGCCAAGATC  
 TTGGATAAAAAATTACAGATAGAACAATTGGAATGGGACATGCTCAACAGTACCGATGAAAC  
 TGAGGTATCACGCTACAAAAAGAGGTTAATTTGAGGAAATCTAAGTTGGATAAGTTCAACT  
 ACAAGCATATGGGTGCCCTTGCGTACATCGGCTCTGAAACCGCAATTGCAGATTTGCATATG  
 GGGACTCATCATAACAGTTGAAAGGTATGTTTGCCTTCTTGTTTTGGAAATCCGCTTATTT  
 GGCCATGTGTCTCTCTATCAGGAATAGGATTTTAATTGCCATGGACTGGACCAAAGTTTACT  
 TTCTTGGAAAGGGATTCCCTCCGTGTAG

>YCL028W 1.5 Hot

ATGGATACGGATAAGTTAATCTCAGAGGCTGAGTCTCATTTTTCTCAAGGAAACCATGCAGA  
 AGCTGTTGCGAAGTTGACATCCGCAGCTCAGTCGAACCCCAATGACGAGCAAATGTCAACTA  
 TTGAATCATTAATTCAAAAATCGCAGGATACGTCATGGACAACCGTAGTGGTGGTAGTGAC  
 GCCTCGCAAGATCGTGCTGCTGGTGGTGGTTCATCTTTTATGAACACTTTAATGGCAGACTC  
 TAAGGGTTCTTCCCAAACGCAACTAGGAAAACTAGCTTTGTTAGCCACAGTGATGACACACT  
 CATCAAATAAAGGTTCTTCTAACAGAGGGTTTGACGTAGGGACTGTCAATGCTAAGT  
 GGTCTGGCGGCGGGAGCCAAAGTATGGGTGCTTCCGGCCTGGCTGCCTTGGCTTCTCAATT  
 CTTTAAGTCAGGTAACAATTCCTAAGGTCAGGGACAAGGTCAAGGTCAAGGTCAAGGTCAAG  
 GACAAGGTCAAGGTCAAGGTCTTTTACTGCTTTGGCGTCTTTGGCTTCATCTTTCATGAAT  
 TCCAACAACAATAATCAGCAAGGTCAAATCAAAGCTCCGGTGGTTCTCCTTTGGAGCACT  
 GGCTTCTATGGCAAGCTCTTTTATGCATTCCAATAATAATCAGAACTCCAACAATAGTCAAC  
 AGGGCTATAACCAATCCTATCAAAACGGTAACCAAAATAGTCAAGGTTACAATAATCAACAG  
 TACCAAGGTGGCAACGGTGGTTACCAACAACAACAGGGACAATCTGGTGGTGCCTTTTCTC  
 ATTGGCCTCCATGGCTCAATCTTACTTAGGTGGTGGACAACTCAATCCAACCAACAGCAAT  
 ACAATCAACAAGGCCAAAAACAACAGCAGCAATACCAGCAACAAGGCCAAAACTATCAGCAT  
 CAACAACAGGGTCAGCAGCAGCAACAAGGCCACTCCAGTTCATTCTCAGCTTTGGCTTCCAT  
 GGCAAGTTCCTACCTGGGCAATAACTCCAATTCAAATTCGAGTTATGGGGGCCAGCAACAGG  
 CTAATGAGTATGGTAGACCGCAACAGAATGGTCAACAGCAATCCAATGAGTACGGAAGACCG  
 CAATACGGCGGAAACCAGAACTCCAATGGACAGCACGAATCCTTCAATTTTCTGGCAACTT  
 TTCTCAACAGAACAATAACGGCAACCAGAACCGCTACTGA

>YFR027W 1.52 Hot

ATGAAAGCTAGGAAATCGCAGAGAAAAGCGGGCAGTAAACCAAATCTTATCCAGTCTAAATT  
 GCAAGTTAATAATGGTTCGAAATCGAATAAAATAGTCAAGTGTGATAAATGTGAGATGTCAT  
 ATTCTCGACATCAATAGAAGATCGCGCCATCCACGAGAAATACCACACTTTACAGCTGCAT  
 GGACGTAAATGGTCGCCGAATTGGGGTCTATAGTATACACAGAGCGAAACCATTCAAGGAC  
 GGTGCATCTATCAAGATCGACAGGGACAATAACGCCATTGAACTCCTCACCTTTGAAAAAAA  
 GTAGTCCGTCTATTACCCATCAGGAGGAGAAGATTGTATATGTGAGACCAGATAAGTCAAT  
 GGTGAAGTCCGAGCCATGACGGAGATAATGACACTAGTGAATAACGAGCTGAATGCGCCACA  
 CGATGAGAATGTCATTTGGAACAGTACCACAGAAGAAAAAGGCAAAGCGTTTGTATACATAA  
 GAAATGACAGGGCGGTCGGAATAATAATTATAGAGAACCCTTTATGGGGCAATGGTAAAACA  
 TCTAGTCGTGGACGTTGGATGGTTTATGATCTAGAAGATTGGTACAGAATGTGTACCCCGA  
 TTTTAAGATTGGCATATCGAGAATTTGGGTGTGCAGGACAGCAAGGAAGTTGGGTATCGCAA  
 CCAAATTGATTGACGTTGCAAGAGAAAATATTGTTTACGGTGAAGTTATCCTAGGTACCAG  
 GTAGCATGGTCGCAACCCACAGACAGCGGTGGAAAACCTGGCTAGCAAATACAACGGCATTAT  
 GCATAAATCAGGCAAGTTACTATTGCCGGTATACATATGA

>YJR114W 1.56 Hot

ATGGGCACGGACTTCAGTGCCTCCCATTTGTGCCAACTGCTCTGCAGTTGGCTTTATCTTGG  
 GCCCGCTGTGAACCTGTAAAGAGGTCTACTTTGGACTGGCCCGGTGGAGCCAGCGAGGTCT  
 CTGGCAGGTATCTTTTGCAGAGAACTCTTCCCTTAGCTCGTTGATCGCTTCAAGCCACTCG  
 TCGACCCCTTTCTCTGCCGATGGTTCGCTAGCTGGTGTTCGTAAGTACTGACGACTGGAAACGAGC  
 AACACATGTCCACTTTGCCACAGGAGACGTGGCCTGACTAACATATACTCCTCGCACAAT  
 GCAGCATTATATCACCTCAGATCCGTATCTATCTATTTTCTTCTGAAAACGATAGCTGCT  
 GTCTTTTCTGTACGTGTATAA

>YJL026W 2.12 Hot

ATGCCTAAAGAGACCCCTTCCAAAGCTGCTGCCGATGCATTGTCCGACTTGGAAATCAAAGA  
 TTCCAAGTCCAACCTTAACAAGGAATTGGAGACATTGAGAGAGGAAAACAGAGTAAAGTCAG  
 ACATGCTTAAGGAGAAATTGAGCAAGGACGCTGAAAATCACAAGGCTTACTTGAAATCTCAT  
 CAAGTTCACCGTCACAACTTAAGGAAATGGAAAAGGAGGAACCTTTGTTGAATGAAGACAA  
 GGAGAGAACTGTTCTTTTCCCTATCAAGTACCATGAAATCTGGCAAGCCTACAAGCGTGCCG  
 AAGCTTCTTTCTGGACCGCTGAAGAAATTGATTTGTCTAAGGATATCCATGACTGGAACAAC  
 AGAATGAACGAAAACGAGAGATTTTTTCATTTCCAGAGTTCTTGCCTTTTTTCGCCGCTTCTGA  
 CGGTATTGTTAATGAAAACCTGGTTGAAAACCTTCTCCACCGAAGTCCAAATTCAGAGGCAA  
 AGAGTTTCTACGGTTTCCAAATCATGATTGAAAATATTCACCTCTGAACTTACTCCTTGTTG  
 ATCGATACTTACATCAAGGACCCCTAAAGAAAGTGAATTCTTGTTCAATGCCATTCACACCAT  
 CCCAGAAATCGGTGAGAAGGCCGAATGGGCTTTAAGATGGATTCAAGACGCTGACGCCTTGT  
 TTGGTGAAAGACTAGTTGCCTTTGCCTCCATTGAAGGTGTCTTTTTCTCCGGTTCCCTTGCC  
 TCCATTTTTCTGGTTGAAAAAGAGAGGTATGATGCCCGGTTAACCTTTTCCAACGAATTGAT  
 CTGTAGAGACGAAGTTTGCACACCGACTTTGCATGCTTGTGTTGCGCCATTTGAAGAACA  
 AACCAGACCCAGCCATTGTTGAAAAAATTGTCACCGAGGCTGTGGAAATGAACAAAGATAC  
 TTCTTGACGCTTACCAGTTGCTTTGCTAGGTATGAACGCTGACTTAATGAACCAATACGT  
 TGAGTTCGTGCGCGACAGACTGTTGGTTGCTTTCGGTAACAAGAAATACTACAAGGTCGAAA  
 ACCCCTTCGATTTTCATGGAAAACATCTCCTTGGCCGGTAAGACCAACTTCTTCGAAAAGAGA  
 GTTCTGACTACCAAAGGCTGGTGTATGTCCAAGTCGACTAAGCAAGAAGCCGGTGCCTT  
 CACCTTCAACGAAGACTTTTAA

>YHR126C 1.61 Hot

ATGAAGTGCACCTTTAGTTTTCCACATTGTTTGCCATCACCAATATTCTAGTTGCACATGCACA  
 AGTAAGCAACTCCTCAGACACGTTGGACGTACAATTTGCGAATAGTACGAACTCGTACATAG  
 AAGGAAAATTTAATTCGACTGATGAAGCCTTCAACAGCAGCGCATCTTGTCCTTAGCAGCT  
 CAGCAGAAAAAGATATCTAATGCAGCTGTATATGATGTGGGTGGTTGGAATGGCTCATTGTA  
 TCGTTCCAATAGAAGCGCTGTTGCAGATCATCAACCCGGCAAAAAGCAAGATGCCGCTATTT  
 CACAGATCAGTGATGGTCAAATCCAAGCCACTGCGTCTGGACCTGAGACTACCGCTGCTACT  
 ACCCCAAGTAGTACCGCAAATGTCTCTGTCTATGAAGGTGCTGGTATGAAGGTTGAATCCAA  
 GAACATGGGTTATATAGTTGGAGTAGCAGCGCTATTATTTTTATAA

>YPL042C 1.65 Hot

ATGTATAATGGCAAGGATAGAGCACAAAACCTCCTATCAGCCAATGTACCAAAGGCCTATGCA  
 GGTACAAGGACAACAGCAAGCTCAATCGTTCTGTTGAAAGAAAAACACAATCGGAAGTGTGC  
 ATGAAAAGCCCCGATGCTAATGGCCAATAATGATGTTTTTACTATTGGACCTTATAGGGCA  
 AGAAAAGATAGAATGCGGGTATCTGTCTTAGAAAAGTACGAAGTTATTGGCTACATTGCTGC  
 GGGCACATATGGTAAAGTTTACAAAGCGAAAAGACAAATCAACTCCGGTACCAATTCGGCTA  
 ATGGTTCTAGTCTGAATGGTACCAATGCGAAAATTCGCGAGTTTGACAGCACGCAACCAAAA  
 TCAAGCTCTTCAATGGACATGCAGGCAAATACAAACGCATTAAGAAGAACTTGTAAAGGA  
 TGAAGGAGTGACCCCGGAAGAATACGAACCTACGAGGGAAGATGTATCCCCGCACTATAATT  
 CCCAAAACAAAACCTCATTAAAAAACCGCTGACGGTATTTTATGCCATTAAAAAGTTCAAG  
 ACAGAGAAGGATGGCGTCGAACAATTGCATTATACGGGAATATCTCAGAGTGCCTGTAGAGA  
 AATGGCATTATGTGCGAGAATTGCACAACAAGCATTTAACCACATTAGTGGAATTTTTTTGG  
 AAAGGAAATGTGTCCATATGGTATACGAATATGCGGAGCATGATCTGCTACAAATTATCCAC  
 TTCCATTCCCATCCCGAAAAAAGGATGATACCACCAAGAATGGTTCGGTCTATTATGTGGCA  
 GCTTTTAGACGGCGTATCGTATCTTCATCAAAATTTGGGTGCTTCATCGAGATTTGAAACCCG  
 CAAATATAATGGTGACCATAGATGGATGTGTTAAAATTTGGTGATTTAGGTTTGGCCAGAAAA  
 TTTCATAATATGCTGCAAACCTCTATACTGGGGATAAAGTGGTTGTCACTATATGGTACCG  
 TGCACCTGAGTTGCTATTGGGAGCACGGCACTATACCCCTGCGGTTGATTTATGGTCCGTTG  
 GCTGCATTTTTGCAGAACTGATAGGATTACAGCCCATATTTAAAGGTGAAGAAGCTAAACTA  
 GACTCTAAAAAGACTGTTCCATTTCAAGTGAATCAACTACAGAGAATTTTGGAAAGTCTTGG  
 CACTCCCGATCAAAAATTTGGCCTTATTTGGAGAAGTATCCAGAATATGATCAAATTACGA  
 AGTTTCCAAAGTATAGGGATAACCTTGCTACATGGTATCATTCGCGGGGAGGAAGGGACAAG  
 CATGCTTTAAGCTTACTTTACCCTTGTAAATTTATGATCCAATTAAGAATAGATGCATT  
 TAATGCGTTGGAACATAAGTACTTCACAGAAAGTGATATTCCTGTTAGTGAAAATGTATTTG  
 AAGGTCTAACTTACAAATACCCGGCAAGAAGAATTCACACGAACGATAATGACATCATGAAT  
 CTTGGATCAAGAACGAAAAACAATACACAAGCTTCAGGAATCACCGCAGGTGCCGCTGCAA

TGCGTTAGGTGGGCTTGGTGTAAACCGTAGAATTCTGGCCGCGGCAGCAGCAGCCGCTGCTG  
CGGTGTCAGGAAACAATGCATCAGATGAGCCATCTCGAAAGAAAAACAGAAGATAG

>YJL079C 2.26 Hot

ATGAAACTTTCTAAATTATCGATCTTAACCTCCGCCTTAGCCACGTCTGCATTGGCCGCTCC  
TGCCGTTGTTACTGTCACTGAACACGCCCATGAGGCTGCAGTCGTTACTGTGCAAGGCGTAG  
TTTATGTGCGAAAACGGCCAAACACGTACAACCTTACGAAACACTAGCTCCTGCTTCCACTGCC  
ACTCCAACCTTCTACAGCTACAGCTTTGGTTGCTCCCCCTGTCGCTCCTTCCCTGCTTCCAG  
CAATTCCGATGTGGTCTTGTCTGCTTTGAAGAACTTAGCCTCTGTTTGGGGTAAAACCTACCG  
ATTCAACGACCACGTTGACATCTTCTGAATCTACATCGCAATCGTTGGCTCAAGCTACTACG  
ACTTCTACACCCGCTGCTGCTTCCACCCTTCCACACCCGCTGCTACCACCACCCTTCTCA  
AGCCGCTGCTACTAGCTCAGCATCGTCTTCGGATAGTGACCTGTCAGATTTTGCCTCTTCTG  
TGTTGGCTGAACACAACAAGAAGAGAGCTTTGCACAAGGACACACCAGCTTTGTCTGGTCC  
GATACTTTGGCCTCCTACGCTCAAGACTATGCTGACAACCTATGATTGCTCCGGCACTTTGAC  
CCATTCTGGCGGTCCATACGGTGAACCTTGGCTTTGGGTATGACGGCCAGCTGCCGTCG  
ACGCTTGGTACAATGAAATTTCCAACCTACGACTTCTCGAATCCAGGCTTTTCAAGTAACACT  
GGCCACTTTACTCAAGTCGTTTGAAGTCCACCACCCAAGTTGGTTGTGGCATCAAAACCTG  
TGGCGGTGCATGGGGTGACTATGTCATCTGTAGTTACGACCCCGCAGGAAACTACGAAGGCG  
AATACGCCGATAATGTCGAGCCCCCTAGCTTAA

>YDR050C 1.81 Hot

ATGGCTAGAACTTTCTTTGTCGGTGGTAACTTTAAATTAACGGTTCCAAACAATCCATTAA  
GGAAATTGTTGAAAGATTGAACACTGCTTCTATCCAGAAAATGTCGAAGTTGTTATCTGTC  
CTCCAGCTACCTACTTAGACTACTCTGTCTCTTTGGTTAAGAAGCCACAAGTCACTGTCGGT  
GCTCAAAACGCCTACTTTGAAGGCTTCTGGTGCCTTCCACCGGTGAAAACCTCGTTGACCAAT  
CAAGGATGTTGGTGCTAAGTGGGTATATTTGGGTCACTCCGAAAGAAGATCTTACTTCCACG  
AAGATGACAAGTTCATTGCTGACAAGACCAAGTTCGCTTTAGGTCAAGGTGTCGGTGTCTATC  
TTGTGTATCGGTGAACTTTGGAAGAAAAGAAGGCCGGTAAGACTTTGGATGTTGTTGAAAG  
ACAATTGAACGCTGTCTTGAAGAAGTTAAGACTGGACTAACGTCGTTGTCGCTTACGAAC  
CAGTCTGGGCCATTGGTACCGGTTTGGCTGCTACTCCAGAAGATGCTCAAGATATTCACGCT  
TCCATCAGAAAGTCTTTGGCTTCCAAGTTGGGTGACAAGGCTGCCAGCGAATTGAGAATCTT  
ATACGGTGGTTCCGCTAACGGTAGCAACGCCGTTACCTTCAAGGACAAGGCTGATGTCGATG  
GTTTCTTGGTCCGTGGTGTCTTTTGAAGCCAGAATTTGTTGATATCATCAACTCTAGAAAC  
TAA

>YAL013W 1.99 Hot

ATGAGTCAGCAAACACCACAGGAAAGTGAACAGACCACAGCGAAAGAACAGGACCTTGATCA  
AGAGAGCGTGTGAGCAACATTGACTTCAATACGGATTTGAATCACAATTTGAATTTATCGG  
AATACTGTATATCCAGTGACGCAGGAACAGAGAAGATGGATAGCGACGAGGAGAAGTCTTTG  
GCCAATCTGCCGGAGTTGAAATACGCTCCCAAGCTATCCAGCCTGGTGAAGCAAGAGACGCT  
CACCGAGAGCTTGAAGAGACCACACGAAGATGAGAAAGAGGCGATAGATGAGGCCAAGAAGA  
TGAAAGTGCCGGGAGAGAACGAGGACGAAAGCAAGGAAGAGGAAAAGAGTCAAGAAGTGGAA  
GAGGCAATTGACAGCAAGGAGAAGAGCACCGACGCCAGGGACGAGCAAGGGGACGAAGGTGA  
TAATGAGGAGGAAAACAACGAGGAGGATAATGAAAACGAAAACGAGCATAACAGCACCCGCTG  
CGCTGGTGTATGCCCTCCCCATCGAAATGGAGGAACAGAGGATGACTGCGCTGAAGGAAATC  
ACCGACATCGAGTACAAGTTCGCGCAATTGCGCCAAAAACTATATGACAATCAATTGGTGGC  
GTTGCAAACGGAGCTGCAGATGTGTCTGGAAGGGTACACCCGGAATTGCAGGTCTACTACT  
CGAAGATTGCCGCGATCCGTGACTACAAGCTACACCGAGCGTACCAGCGACAGAAGTACGAG  
CTTTCATGCATCAACACAGAAACAATCGCTACCAGGACATTCATTACACAGGACTTCCACAA  
GAAGGTCACCGACCTGCGAGCCAGGCTGCTGAACAGAACCACGCAGACCTGGTACGATATCA  
ACAAGGAGCGCCGCGATATGGATATAGTCATCCAGATGTCAATTACCACGTCCCCATCAA  
CTTGATAACAAGACGCTGAGCTGTATCACGGGCTACGCCAGCGCAGCACAGCTGTGCTATCC  
CGGCGAGCCCGTGGCAGAGGACCTCGCTTGCAGAAAGCATCGAGTACCGCTACAGAGCCAACC  
CGGTGGACAACTCGAAGTCATTGTGGACCGAATGAGGCTCAATAACGAGATTAGCGACCTC  
GAAGGCTGCGCAAATATTTCCACTCCTTCCCGGTGCTCCTGAGTTGAACCCGCTTAGAGA  
CTCCGAAATCAACGACGACTTCCACCAGTGGGCCCAGTGTGACCGCCACACTGGACCCCAT  
CCACTTCTTTTTGTTATTCTTAA

>YHR219W 1.61 Hot

ATGGACTTGAATCAAAGAAAGGAAAAAAGGGCCAGCATGTTGGATGCTGTGGCTCCAGGAC  
 AGACCTGTCTGCTGACACAGTGGAACTGATAGAAAGAATGGACAGATTGGCTGAAAATCAGG  
 CGACAGCTTCCATGTCGATCGTTGCGTTACCGTCTAGCTTCCAGGAGAGCAATAGCAGTGAC  
 AGGTGCAGAAAGTATTGCAGCAGTGATGAGGACAGCGACACGTGCATTCATGGTAGTGCTAA  
 TGCCAGTACCAATGCGACTACCAACTCCAGCCTAATGCTACTACCACTGCCAGCATCAACG  
 TCAGGACTAGTGCGACTACCACTGCCAGCATCAACGTGAGGACTAGTGCGACTACCACTGAA  
 AGTACCAACTCCAACACTAATGCTACTACCACTGAAAGTACCAACTCCAGCCTAATGCTAC  
 TACCACTGCCAGCATCAACGTGAGGACTAGTGCGACTACCACTGAAAGTACCAACTCCAACA  
 CTAGTGCTACTACCACCGAAAGTACCGACTCCAACACTAGTGCTACTACCACCGAAAGTACC  
 GACTCCAACACTAGTGCTACTACCACTGCTAGCACCCTCCAGCCTAATGCCACTACCAC  
 TGCTAGCACCCTCCAGCCTAATGCCACTACCACTGAAAGTACCAACGCTAGTGCCAAGG  
 AGGACGCCAATAAAGATGGCAATGCTGAGGATAATAGATTCCATCCAGTCACCGACATTAAC  
 AAAAGAGTCGTATAAGCGGAAAGGGAGTCAAATGGTTTTGCTAGAGAGAAAGAACTGAAAGC  
 ACAATTTCCCAATACTTCCGAGAATATGAATGTCTTACAGTTTCTTGGATTTCCGGTCTGACG  
 AAATTAACATCTTTTCTCTATGGTATTGACATATACTTCTGCCAGAGGGAGTATTCACA  
 CAATACGGATTATGCAAGGGCTGTCAAAAGATGTTGAGCTCTGTGTCTGTTGGGCTGGCCA  
 GAAAGTATCGTATCGGAGGATGGCTTGGGAAGCACTAGCTGTGGAGAGAATGCTGCGAAATG  
 ACGAGGAATACAAAGAATACTTGAAGACATCGAGCCATATCATGGGGACCCTGTAGGGTAT  
 TTGAAATTTTTTAGCGTAAAAAGGGGAGAGATCTACTCTCAGATACAGAGAAATTATGCTTG  
 GTACCTGGCCATTACTAGAAGAAGAGAAACAATTAGTGTATTGGATTTCGACAAGAGGCAAGC  
 AAGGGAGCCAAGTTTTCCGCATGTCTGGAAGGCAGATCAAAGAGTTGTATTATAAAGTATGG  
 AGCAACTTGCGTGAATCGAAGACAGAGGTGCTGCAGTACTTTTTGAACTGGGACGAAAAAAA  
 GTGCCGGGAAGAAATGGGAGGCAAAAGACGATACGGTCTTTGTGGAAGCGCTCGAGAAAGTTG  
 GAGTTTTTTCAGCGTTTTGCGTTCATGACGAGCGCTGGACTGCAGGGTCCGCAGTACGTCAAG  
 CTGCAGTTTTAGCAGGCATCATCGACAGTTGAGGAGCAGATATGAATTAAGTCTAGGAATGCA  
 CTTGCGAGATCAGCTTTCGCTGGGAGTTACCCATCTAAAGTGCCGCATTTGGACGGCATTCC  
 TGTCGATGCTGATAGGGCTGTTCTACAATAAAACATTTCCGGCAGAAACTGGAATATCTTTTG  
 GAGCAGATTTCCGAGGTGTGGTTGTTACCACATTTGGGTTGATTTGGCAAACGTTGAAGTTCT  
 CGCTGCAGATAACACGAGGGTACCCTGTACATGCTGATGGTAGCGGTTCAAAAGAGCTGG  
 ATAGCGATGATGTTCCAGACGGTAGATTTGATATAATATTACTATGTAGAGATTCGAGCAGA  
 GAAGTTGGAGAGTGA

>YJR021C 1.54 Hot

ATGGTTCGCTAGAGGTAGAACAGACGAGATATCTACAGATGTTTCAGAGGCTAATTCTGAACA  
 CTCGTTGATGATTACAGAAACATCATCACCGTTCAGATCTATATTCTCCACAGTGGGAAAG  
 TAGCGAATGCAGGCGCTTTAGAGGAATCGGACAAGCAGATACTGGAATGGGCAGGTAAACTG  
 GAATTGGAGAGTATGGAGCTGAGGGAAAACCTCTGACAAGCTAATTAAGTTTTAAATGAAAA  
 TTCTAAGACATTATGTAAATCGCTAAACAAGTTTTAACCAGCTACTGGAACAAGATGCTGCTA  
 CGAACGGAAACGTGAAAACCTTAATAAAGGATTTGGCTTCCAGATTGAAAACCAACTGGAC  
 AAAGTGTCAACAGCAATGTTATCGAAAGGCGACGAGAAGAAGACAAAGTCGGATTCCAGCTA  
 CAGGCAGGTATTAGTCGAAGAAATAAGCAGGTATAATTCCAAGATAACGCGACACGTAACCTA  
 ACAAGCAGCATGAGACGGAAAAGTCGATGAGGTGCACCCAGGAGATGCTCTTCAACGTCGGC  
 AGCCAACCTGGAGGACGTGCATAAAGTGCTCCTGTCTCTATCCAAGACATGCACAGTCTACA  
 AACCCGCCAGACTGCTCTAGAGATGGCGTTTCGAGAAAAGGCAGATCACGCCTACGATCGCC  
 CGGATGTGTCTCTGAATGGCACCACACTCCTGCACGATATGGACGAAGCCACGATAAGCAG  
 CGTAAGAAGTCCGTGCCGCCACCAAGAATGATGGTCACAAGGTCCATGAAACGCAGAAGATC  
 CAGCTCCCCAACCTATCCACCAGCCAAAACCACAATAGCGAAGACAATGATGACGCTAGCC  
 ATCGGCTGAAGCGTGCGGCCAGGACCATTATTCCTGGGAGGAACTAAGACCCGACACTCTG  
 GAATCTGAGCTGTGA

>YML121W 1.65 Hot

ATGTCGTCAAATAATAGGAAGAACTGCTTCTGATGGGCCGGTCCGGCTCCGGTAAATCGTC  
 AATGAGGTCGATCATCTTTAGTAACTACTCCGCTTTTGACACTAGGAGATTGGGTGCCACCA  
 TTGATGTAGAGCACTCCCATTTGAGATTTCTTGGGAATATGACTCTAAATCTGTGGGACTGT  
 GGTGGGCAGGACGTGTTTATGGAGAATTATTTACCAAGCAAAAAGACCACATTTCCAGAT

GGTGCAGGTGTTAATTCACGTTTTTGGATGTAGAGTCAACTGAAGTTCTCAAGGATATTGAAA  
TATTTGCAAAAGCTTTGAAGCAATTAAGGAAGTACTCTCCCGACGCCAAAATTTTTGTTCTT  
CTGCATAAGATGGATCTTGTTCAGTTGGATAAGAGAGAGGAGCTGTTCCAAATCATGATGAA  
AAACCTGAGTGAACGTCTTCGGAATTTGGGTTTCCCAATCTGATAGGTTTTCTACTTCGA  
TTTGGGATGAGAGTTTATACAAGGCATGGTCGCAGATTGTATGCTCGTAATACCCAATATG  
TCCAACCATCAAAGTAATTTGAAGAAGTTTAAGGAGATTATGAACGCCCTTGAAATTATCT  
TTTCGAAAGAACAACCTTTCTTAGTGATATGCTCCAGTAATGGCGAAAATAGTAATGAAAATC  
ATGATAGTTCCGATAATAATAATGTCTTGCTAGACCCGAAGCGATTTCGAAAAGATATCCAAT  
ATAATGAAAACTTCAAGCAGAGTTGCACGAAATTGAAGAGCGGATTCAAGACTTTAATATT  
GAACAACAACATCTACGTCAGCGAGTTATCGTCCAATATGGTGTGTTTTATAGTGTGAAAG  
ATATGAATATCCACAAGAATTAGTATTGGAAAACATCAAAAAGCCAAAAGAGTTTTTCCAA  
TGA

>YPR061C 1.54 Hot

ATGCTACACCATAAGTTCGTATACCCATTTTTATTCAAGTGGCACTTATCATGTGTAGAAAA  
GTGTCCCCCACAAATCACTTTTATAGCTAAGTATGCTACAGCGAACGATAAAAATGGCAATA  
GAAAACCTACGATAAGGGATGAACAATGGCCTGAGTTGGCAGATCCAACCTCCCTATGATATT  
TTTGGCATTCCAAGGCCGGATCTGGAAATCCTAAACTGGACAAGAAGTCGTTAAAAA  
ATATCATCGTTATGTAATAATTGTACCACCTGACCATTCCGATAACATTCAAATATTTAGCT  
CAGAAAAGGTTACCAACAGTGATAGTAAATCACCGCTGCTGCTAACATCAAGCGAAAAACTA  
CATAGATTTAAAGTCATCTCTCAAGCATATGATATTCTTTGTGACCCAAAAGAAAAGATCGT  
ATATGACACAACGAGGCAAGGCTGGACCACATCGTATTCACCACGTTCTAACGTTAATACTG  
AAAATTACCAATATGCCGGCTCTTATGGCTACCCTCTAACGCGCAGTATGAATACTGGAAC  
GCTGGGACTTGGGAAGACGCAAAATAGCATGAAAAACGAAAAGAAATTCAGAAAACATCAACCC  
ATGGACCGTTATTGGCATAATTTGTGGCCTAGCTATATGCATCGAAGGGACTGCGTTGTAG  
CCAAAATCCAGGAGTCTCTGAGCAAGGCCGAATTTACTCATGACGAAAAGTGGATTACATTTG  
ATTCAGTCATACACGAATTATGGTCTTGATACTGACAAATTTCCAGATTGAGGCGGTTCTT  
ATGGTTTTAGAACTTGGGGACTTTACAAGTCGAAAGAGGATTTAGATAGAGAAGCCAAGATCA  
ATGAAGAAATGATACGCAAACTGAAAGCAGCTAAATGA

>YGR078C 2.34 Hot

ATGGACACACTGTTCAACTCCACGGAAAAGAATGCCAGAGGCATACCGCAGGCTCCATTTCAT  
CGAAAATGTCAACGAAATAATTAAGGACCCAAGCGACTTCGAATTGTGCTTCAATAAGTTCC  
AAGAACGGCTTTCTAAGTACAAATTTATGCAGGAATCTAAATTTGGCTACGATAAAGCAGCTG  
AAGACTAGAATCCCGGACTTGGAAAACACATTAATAATATGCCAAAGTCTGCGCAATCACAG  
CGACGAGGGCGATGAGAGCGATGAACCTATCCTGTTGCACTACCAATTGAACGACACGCTCT  
ACACAAAGGCTCAGGTTGATATACCGGAAGATCGGGCGGATTTGAAAGTTGGGTTGTGGCTT  
GGCGCAGACGTGATGCTGGAATATCCCATCGACGAGGCCATAGAGTTGTTAAAGAAGAACT  
CGCGGATTCGGAACAGTCTTTAACGGTGTCCACCGAGGACGTAGAGTTTTTGGGGAAAATA  
TCACGACAATGGAGGTCAATTGCGCGCGATTGTATAACTGGGACGTTTCAGAGAAGGCAAGAC  
TTGAAGCAGGCTCAAGAAGGGACTAAAACCTCAAGATATAA

>YJL120W 1.64 Hot

ATGACATTCGCAACCCAAGTTGGCGAAGTCAGAAGCAAGGATACTGGGAGCTATAATTGGTT  
TGACCATTTTTCTTGTGTGTTTACCTCGCTCTTGGAAATTAGCAAATGGCCTTCTTGCATGA  
AATTGTATCGAGTTTGTCTTTATTTTTCTTTTACGGGCGGATTCTTTCTATTCTGGCTTTCC  
TATAACAGAGATCATGAAAGAAGTTCCAGCTTACGGATCAAGAAAGTACCTATACATATACA  
AAAATCTGATTACTTTCCAGCTCGACTTGGATAGCTGTTCTTGTTTTTCTTTGGCGACACA  
TTTTTTGTTTTCTGA

>YAL043C 1.6 Hot

ATGTCATCTGCAGAGATGGAACAATTGTTACAGGCCAAGACACTGGCCATGCACAACAATCC  
AACGGAGATGCTGCCAAGGTGCTCGAACTACGGCATCCATGTACCACAACGGTAATCTCA  
GCAAGCTGAAGTTGCCTTTGGCCAAGTTTTTTACACAGTTAGTTCTAGACGTGGTGTGATG  
GACTCTCCAATTGCGAATACTGAGAGACCGTTTATTGCTGCTCAATATCTGCCACTACTTCT  
TGCTATGGCGCAATCCACCGCGGACGTACTAGTGTACAAGAATATCGTGTCTTATTATGTGCG  
CTTCATACCCGCTGGTGTGGATCTGGTTGCTAAGACATCAAACCAGGAAATGTTTGATCAG

TTGTGTATGCTGAAGAAGTTCGTGCTCTCGCACTGGAGAACTGCATATCCTTTGCGTGCCAC  
 CGTTGACGATGAAACGGATGTGCAACAATGGCTGGCGCAGATTGACCAAAATATCGGCGTGA  
 AATTAGCGACCATCAAGTTCATATCTGAGGTCGTGCTGTGCGAACTAAATCACCCAGCGGC  
 AACGAGATTAATTCATCTACCATCCCGGATAACCACCCTGTGTTGAACAAACCGGCTTTGGA  
 GAGCGAGGCTAAGAGGCTTCTTGATATGTTGCTAAACTACCTAATTGAGGAACAGTACATGG  
 TCTCGTCCGTTTTTCATTGGTATCATCAATTCCTTATCCTTCGTTCATCAAAAGAAGGCCGAG  
 ACAACAATAAGAATTCCTTTCCGGGCTGTTGCGTTTTCAACGTCGACGCCAAGTTTTCCCCTAGA  
 GGGCAAGTCTGACTTGAACACAACTATCCAAGAGATTTGTTGAAAGGGCGTACAAGAACT  
 TTGTGCAATTTGGGCTAAAAAATCAAATCATTACAAAATCCCTCTCATCCGGATCAGGGTCA  
 TCGATCTACTCCAAGCTGACCAAGATTTCTCAAACCTTTACACGTTATTGGCGAAGAGACCAA  
 GAGCAAGGGAATTTTGAACCTCGACCCTTCCAAGGGCAATAGCAAGAAAACGTTGTCCAGGC  
 AGGACAACTAAAATACATCTCACTATGGAAAAGGCAATTATCCGCGTTATTGTCTACTCTA  
 GGGGTGTCCACAAAGACCCCCACGCCTGTGTCCGCACCTGCAACGGGCTCTTCAACCGAAAA  
 CATGCTTGATCAACTGAAGATATTGCAAAAAATACACCCTCAACAAGGCTTCACACCAGGGCA  
 ATACTTTTTTCAACAACCTACCCAAACCAATCAGCAACACCTACTCATCTGTGTACTCATTG  
 ATGAACAGTTCGAACCTCAACCAGGATGTGACCCAGCTACCCAATGACATACTTATCAAGCT  
 GTCCACAGAGGCCATCTTGCAAATGGACAGCACGAAACTGATCACCGGATTTGTCTATCGTTG  
 CTTTCGAGGTACACGGATTTAATGAATACGTACATCAATTCGTACCGTCCCTCGTCATCATCA  
 AAGAGGAAATCCGACGATGATGACGACGGCAACGACAATGAAGAAGTTGGAAACGATGGCCC  
 AACGGCTAATAGCAAGAAAATCAAAATGGAAACAGAACCCTAGCGGAGGAACCAGAGGAGC  
 CCGAAGACGATGACCGAATGCAGAAGATGCTTCAAGAAGAGGAAAGCGCCCAAGAAATCTCA  
 GGAGATGCCAACAAATCAACTTCTGCCATTAAGGAGATCGCACCCCCCTTTGAACCTGACTC  
 ATTGACGCAGGATGAAAAACTAAAGTACCTCTCAAAGCTGACCAAGAAAATGTTTTGAATTAT  
 CCGGTGCGCCAGGATACTACCCGGGCCAAATCTTCGTCTTCCCTCCTCCATATTACTGGACGAT  
 GACGACTCCTCGTCATGGTTACACGTCTTAATCAGATTGGTTACGAGAGGAATCGAAGCACA  
 AGAGGCCAGTGACCTGATTCGTGAAGAAGTCTTGGCTTCTTCATCCAGGATTTTCGAGCAAC  
 GTGTGAGTCTGATCATTGAATGGCTCAATGAAGAATGGTTCTTCCAAACCTCGCTGCATCAA  
 GATCCCTCTAACTACAAAAAATGGTCTTAAAGAGTTCTCGAGTCTCTGGGTCCATTCCCTTGA  
 AAACAACACAGACGATTCTTCATCAGACTTATGAGCGAACTGCCCAGTCTTCAAAGCGATC  
 ATCTTGAGGCACTGAAGCCTATCTGCCTGGATCCGGCAAGAAGTTCCCTTGTTTTCCAAACG  
 CTAAGTTTTCTCATTATGTTTTAGACCCCCAGTGCAGGACACTGTTTCGCGACCTGCTGCATCA  
 GCTAAAGCAAGAAGATGAAGGCTTACACAAGCAGTGCGATTCACTGCTTGACAGGCTAAAAAT  
 GA

>YBL095W 1.6 Hot

ATGTCCAGAACTATTTCCATTTCTATTTAAATTAGTCAACAGGGCAGTAATTTTTGCCTACGGC  
 AGGTTTTACATTAGGAGTTGGTGCCTTTGTAAAGGCGTGGCCCGATGATGCCGGTGTCTAT  
 CATTGAATGATCCGCAAACGCCAGCGGAGTTGATTAGTGCGACCAAGAGCCGCCAACCTATG  
 GAGCTGCAGAGGGTTGACATCCTCGCTCAAATCGAGAAAAGCGAGGTTTACAACAAGTTGGC  
 CCAGGATGAGAAGATGCACCATGTCTTATTAGTGAGAAAATACCAAGCGGGCATAGGGAAT  
 ATCATGTAGGACAAGGCCTCTGTTCCGCAAGGGGAAGCTTGA AATTGATCCTTTGGTGTTC  
 CATGATGTGAATCACGGTGAATTAACCGTGATTTATCACTTAGGTGCTGAGTTAGGGAATCG  
 AGACGGTAACGTCCATAAGGGCTTGTGTGCTATTGTTGCTGGATGAAGCATTGTGCTATTGTG  
 GCTTCCCTTTGTTGCCTAGTAAAAGAGGTGTAACCTGCAAGGCTGTCGCTAGAGTTTTTTGAG  
 GACATTCCTGTAGATACTACGATTATACTAAAAGCAAACGTCAAAGAGATTAAGGCAGAAA  
 GTGTATCATTGAGGGACACTTGGAACAGTTCCGTTGGAAGTTTCTTCTCGAAATGGAACATA  
 GAAGTTGGAACCTACCACATATTTGGGGTTTCAACCATAAGCAGGAGATGGCAAAAAAATTT  
 GCCAAGGCCAATTGTATTCTCGTTGAGCCTACTTGGTTCAAATATTTTAAATGGCTTGATAT  
 GTTTTGA

>YIL053W 1.7 Hot

ATGCCCTTTGACCACAAAACCTTTATCTTTGAAAATCAACGCCGCTCTATTTCGATGTTGACGG  
 TACCATCATCATCTCTCAACCAGCCATTGCTGCTTTCTGGAGAGATTTCCGGTAAAGACAAGC  
 CTTACTTCGATGCCGAACACGTTATTACATCTCTCACGGTTGGAGAACTTACGATGCCATT  
 GCCAAGTTCGCTCCAGACTTTGCTGATGAAGAATACGTTAACAAGCTAGAAGGTGAAATCCC  
 AGAAAAGTACGGTGAACACTCCATCGAAGTTCAGGTGCTGTCAAGTTGTGTAATGCTTTGA  
 ACGCCTTGCCAAAGGAAAAATGGGCTGTGCGCCACCTCTGGTACCCGTGACATGGCCAAGAAA

TGGTTCGACATTTTGAAGATCAAGAGACCAGAATACTTCATCACCGCCAATGATGTCAAGCA  
 AGGTAAGCCTCACCCAGAACCATACTTAAAGGGTAGAAACGGTTTGGGTTTCCCAATTAATG  
 AACAAAGACCCATCCAAATCTAAGGTTGTTGCTTTTGAAGACGCACCAGCTGGTATTGCTGCT  
 GGTAAGGCTGCTGGCTGTAAAATCGTTGGTATTGCTACCACTTTCGATTTGGACTTCTTGAA  
 GGAAAAGGGTTGTGACATCATTTGTCAAGAACCACGAATCTATCAGAGTCGGTGAATACAACG  
 CTGAAACCGATGAAGTCGAATTGATCTTTGATGACTACTTATACGCTAAGGATGACTTGTG  
 AAATGGTAA

>YKL035W 1.85 Hot

ATGTCCACTAAGAAGCACACCAAAAACACATTCCTACTTATGCATTCGAGAGCAACACAAAACG  
 CGTTGCTGCCTCACAAATGAGAAACGCCTTAAACAAGTTGGCGGACTCTAGTAAACTTGACG  
 ATGCTGCTCGCGCTAAGTTTGAACGAACCTGGATTGTTTTTTCACGCTTTTCAGGAGATAT  
 TTGGTAGAGAAGTCTTCTAGAACCACCTTGGAAATGGGACAAGATCAAGTCTCCAACCCGGA  
 TGAAGTGGTTAAGTATGAAATTATTTCTCAGCAGCCCGAGAATGTCTCAAACCTTTCCAAAT  
 TGGCTGTTTTGAAGTTGAACGGTGGGCTGGGTACCTCCATGGGCTGCGTTGGCCCTAAATCT  
 GTTATTGAAGTGAGAGAGGGAAACACCTTTTTGGATTTGCTGTTTCGTCAAATTGAATACTT  
 GAACAGACAGTACGATAGCGACGTGCCATTGTTATTGATGAATTCTTTCAACACTGACAAGG  
 ATACGGAACACTTGATTAAGAAGTATTCCGCTAACAGAATCAGAATCAGATCTTTCAATCAA  
 TCCAGGTTCCCAAGAGTCTACAAGGATTCTTTATTGCCTGTCCCACCGAATACGATTCTCC  
 ACTGGATGCTTGGTATCCACCAGGTCACGGTGATTTGTTGAATCTTTACACGTATCTGGTG  
 AACTGGATGCCTTAATTGCCCAAGGAAGAGAAATATTATTTGTTTTCTAACGGTGACAACCTG  
 GGTGCTACCGTCGACTTAAAAATTTTTAAACCACATGATCGAGACTGGTGCCGAATATATAAT  
 GGAATTGACTGATAAGACCAGAGCCGATGTTAAAGGTGGTACTTTGATTTCTTACGATGGTC  
 AAGTCCGTTTTATTGGAAGTCGCCCAAGTTCCAAAAGAACACATTGACGAATTCAAAAAATATC  
 AGAAAGTTTACCAACTTCAACACGAATAACTTATGGATCAATCTGAAAAGCAGTAAAGAGGTT  
 GATCGAATCGAGCAATTTGGAGATGGAAATCATTCCAAAACCAAAAACTATAACAAGAGACG  
 GTCATGAAATTAATGTCTTACAATTAGAAAACCGTTGTGGTGCTGCTATCAGGCATTTTGAT  
 GGTGCTCACGGTGTGTGCTGTTCCAAGATCAAGATTCTTGCCTGTCAAGACCTGTTCCGATTT  
 GTTGCTGGTTAAATCAGATCTATTCCTGCTGGAACACGGTCTTTTGAAGTTAGACCCATCCC  
 GTTTTGGTCCAAACCCATTAATCAAGTTGGGCTCGCATTTCAAAAAGGTTTCTGGTTTTAAC  
 GCAAGAATCCCTCACATCCCAAAAATCGTCGAGCTAGATCATTGACCATCACTGGTAACGT  
 CTTTTTAGGTAAAGATGTCACCTTGAGGGGTACTGTGCATCATCGTTTGGTCCGACGGTCATA  
 AAATCGATATTCCAAACGGCTCCATATTGGAAAATGTTGTCGTTACTGGTAATTTGCAAATC  
 TTGGAACATTGA

>YJL153C 1.85 Hot

ATGACAGAAGATAAATATTGCTCCAATCACCTCCGTTAAAGTAGTTACCGACAAGTGCACGTA  
 CAAGGACAACGAGCTGCTCACCAAGTACAGCTACGAAAATGCTGTAGTTACGAAGACAGCTA  
 GTGGCCGCTTCGATGTAACGCCCACTGTTCAAGACTACGTGTTCAAACCTTGACTTGAAAAAG  
 CCGGAAAAACTAGGAATTATGCTCATTGGGTTAGGTGGCAACAATGGCTCCACTTTAGTGGC  
 CTCGGTATTGGCGAATAAGCACAATGTGGAGTTTTCAAACCTAAGGAAGGCGTTAAGCAACCAA  
 ACTACTTCGGCTCCATGACTCAATGTTCTACCTTGAACCTGGGTATCGATGCGGAGGGGAAT  
 GACGTTTATGCTCCTTTTAACTCTCTGTTGCCCATGGTTAGCCCAAACGACTTTGTGCTCTC  
 TGGTTGGGACATCAATAACGCAGATCTATACGAAGCTATGCAGAGAAGTCAAGTCTCGAAT  
 ATGATCTGCAACAACGCTTGAAGGCGAAGATGTCCTTGGTGAAGCCTCTTCCTTCCATTTAC  
 TACCTGATTTCAATTGCAGCTAATCAAGATGAGAGAGCCAATAACTGCATCAATTTGGATGA  
 AAAAGGCAACGTAACCACGAGGGGTAAGTGGACCCATCTGCAACGCATCAGACGCGATATCC  
 AGAATTTCAAAGAAGAAAACGCCCTTGATAAAGTAATCGTCTTTTGGACTGCAATACTGAG  
 AGGTACGTAGAAGTATCTCCTGGTGTAAATGACACCATGGAAAACCTCTTGCAGTCTATTAA  
 GAATGACCATGAAGAGATTGCTCCTTCCACGATCTTTGCAGCAGCATCTATCTTGGAAAGGTG  
 TCCCTATATTAATGGTTACCGCAGAATACTTTTGTCCCGGCTTGGTTCAGCTGGCTGAG  
 CATGAGGGTACATTCATTGCGGGAGACGATCTCAAGTCGGGACAAACCAAGTTGAAGTCTGT  
 TCTGGCCCAGTCTTAGTGGATGCAGGTATTAACCGGTCTCCATTGCATCCTATAACCATT  
 TAGGCAATAATGACGGTTATAACTTATCTGCTCCAAAACAATTTAGGTCTAAGGAGATTTCC  
 AAAAGTTCTGTACATAGATGACATCATCGCGTCTAATGATATCTTGTACAATGATAAACTGGG  
 TAAAAAAGTTGACCACTGCATTTGCATCAAAATATATGAAGCCCGTCGGGGACTCAAAAGTGG  
 CAATGGACGAGTATTACAGTGAGTTGATGTTAGGTGGCCATAACCGGATTTCCATTCACAAT



GTTTGC GAAGATTCTTTACTGGCTACGCCCTTGATCATCGATCTTTTAGTCATGACTGAGTT  
 TTGTACAAGAGTGTCCATAAGAAGGTGGACCCAGTTAAAGAAGATGCTGGCAAATTCGAGA  
 ACTTTTATCCAGTTTTAACCTTCTTGAGTTACTGGTTAAAAGCTCCATTAACAAGACCAGGA  
 TTTACCCGGTGAATGGCTTAAACAAGCAAAGAACCGCCCTAGAAAATTTTTTAAGATTGTT  
 GATTGGATTGCCCTCTCAAAACGAAC TAAGATTCGAAGAGAGATTGTTGTAA

>YBR214W 2.14 Hot

ATGGCTTCTACTTCGAACACGTTCCCTCCAAGCCAAAGCAATTCTTCCAACAACCTTCCAAC  
 TTCTAGACATGCATCCATTGTGGAGATGCTGTCTACTCCGCCATTGCTGCCCCACGTTCAAG  
 TGAACGATACAGACGACAAGGAACAACCAGAAGAGTCCACGCCGCCAACAGCAACAGCGGCA  
 GCGCCTGGTCCAGGTTGTGCTGCTACACCCGCCCCCTTGCGCGATGAAAAGCCTCAATTCAA  
 ACTATCAGCTGTTCCATGACCCAGACGCCATCGCAGTGTCTGTCATGTGTGCACGCCCAA  
 AATGGCAACACATACCGTTGTGCGCAATTGATCGAACAGAATAAGCTTATTTTTGTTCCAGGT  
 TCCATATCGGTAGAGGAGGCATTCACACTTTGATCAAGTATCATCTAAACTCTATTCCCGT  
 GGAATCTTTCCCGGGCGACATGAACTGTTTTACTTTTTCGACTACAATGACCTTAATTTCGTACC  
 TTTTGTGTTTTTGAATAAAAATCACCGTCAGCAACAAAACAGCTTACTGCAGATTGCCAGAAT  
 GGAAAACCCGTACCAGTGGGCGAAATGGTGAAACTAACTCCTAAGAATCCGTTCTATAAGCT  
 GCCGGAGAATGAGAGTTTGTCCACGGTGATGGGGATTCTCGGTTCCGGGTGTCATCGTG TAG  
 CGATAACAAAACGAAGAGATGACC AAAGTTAAAGGTATTTTGTCCCAACGTCGTTTGATAAAG  
 TATCTTTGGGACAACGCTAGATCTTTTACAAGCTTAGAACCTCTATTAAACTCCTCATTACA  
 AGATTTGCACATCGGTGTTCTCAATATTCAATCTAAGCCAACCTTCAAGACAATCCCGTGTCA  
 TCTCTATTCAAGGCGAGGAGCCCTTAATCATGGGCCTTTATAAAAATGCATGTGGAAAAGATT  
 TCTTCCATTGCAGTCATCGACAAAACAAGGTAATTTGTAGGTAACATATCGGTAACGGACGT  
 AAAACATGTCAACAAGAACCTCCCAATACCCCTTACTACATAAGACATGTCGCCATTTTCAATTT  
 CTGTCAATTTTAAACTCCAGAGGATTAGAAAACGGGTAAAGATTCTTTCCCATTTTTTACGTA  
 TACCCAGTAGTTCACTAGCAAGGACTCTTGCCAAGTTAGTTGCTACAAAAGTCTCATAGACT  
 ATGGATCGTACAACCGCCGGAGTCGTCAACCTCGGCGTCATCCACAAAATTTAACAGCTGCTA  
 ATACTGCAGCCAATGCAGTTTCTGCCACCGCTCAATCGTCTGCTAATGGTGCGACTCCAATG  
 TCAAAGTCATCCTCTTCAACATCCCTCAACTCCACTCTCCGTTGATGACAGCAATGGAAGA  
 CCCACCATCCCACGTTCTTTCGGCCATCGCGATCCCACCACCAAGTCCCGCTTCTCAACAA  
 ACACACCAAACCTATTTCGAAAAGGAATATAGAACGGGTAAAGTTGATCGGTGTGGTCTCATTG  
 ACAGACATCATCAACTTATTAGCAAGGAAACAACAGGGAATAAAGAAGTGGATCCGCAATC  
 CGCAAGAAGACAGAGAGGCAGTATCGCCATGTGA

>YFR033C 2.22 Hot

ATGGGCATGTTGGAAC TAGTTGGTGAGTACTGGGAACA ACTAAAGATAACCGTTGTGCCTGT  
 TGTGGCCGCGCCGAAGATGACGATAACGAGCAGCATGAAGAAAAGGCAGCAGAAGGAGAAG  
 AAAAGAAGAAGAAAATGGGGATGAAGATGAGGATGAAGACGAAGACGAAGATGATGATGAT  
 GATGACGACGAAGATGAGGAAGAAGAGGAAGAAGTCACTGATCAGTTGGAAGATTTGAGAGA  
 ACATTTCAAGAACACGGAGGGTAAGGCCCTTGTGCACCACTACGAGGAGTGTGCTGAGA  
 GAGTCAAGATACAGCAACAACAACCCGGCTACGCGGATCTTGAACACAAGGAGGACTGTGTG  
 GAGGAGTTTTTCCATCTACAGCACTATTTGGACACTGCCACGGCACCTAGATTATTTGACAA  
 ATTAAGTAG

>YIL123W 1.56 Hot

ATGAAATCTCAACTGCCGTTACTACGTTGATTAGTTCTGGTGCCATCGTGTCTGCTTTACC  
 ACACGTGGATGTTCAACAAGAAGATGCCACCAACATAAGAGGGCCGTTGCGTACAAATACG  
 TTTACGAAACTGTTGTTGTGCGATTCTGATGGCCACACTGTAACCTCTGCTGCTTCAGAAAGTC  
 GCTACTGCTGCTACCTCTGCTATCATTACAACATCTGTGTTGGCTCCAACCTCCTCCGCAGC  
 CGCTGGGATAGCCGCTTCCATTGCTGTTTCATCTGCTGCCTTAGCCAAGAATGAGAAAATCT  
 CTGATGCCGCTGCATCTGCCACTGCCTCAACATCTCAAGGGGCATCCTCCTCCTCCTCCTCC  
 TCCTCGGCAACTTCTACCCTAGAAAGCAGCTCTGTTTCTTCTCATCTAGTGAAGAAGCTGCTCC  
 AACATCTACTGTGCTGCAACTTCTTCCGCAACCCAATCTAGTGCTTCTTCTGCCACTAAAT  
 CTAGTACTTCTTCCACTTACCATCTACTTCTACTTCTACTTCCACTTCTTCTACTTCTCTCT  
 TCCTCTTCTCCTCCTCCTCCTCCTCCTTCTTCTTCTTCTTCTTCTTCTTCTTCTTCTTCTTCT  
 TTTGGCCGACTTTTCAGGCCAAGTGAGAAAATCCAAGACGGCACTATTCATGTGACAAAT  
 TCCATCTGGTCAAGGTGTCAATTTCTATTGACTGGATTGGCGAGGGTGGATGGTCCGGTGTG

GAAAACACCGACACTTCCACTGGCGGTTTCATGCAAGGAGGGGTCCTACTGTTCCCTACTCCTG  
 CCAACCAGGTATGTCTAAGACCCAATGGCCATCCGATCAACCATCTGACGGTAGATCTGTGCG  
 GGGTTTTGTTGTGTAAAAATGGTTATTTGTACCGTTCTAACACTGACGCGGATTACTTATGT  
 GAATGGGGTGTGCGAGGCTGCCTATGTTGTTTCTAAACTAAGCAAGGGTGTGCGCCATTTGCAG  
 AACCGACTACCCGGGCACTGAAAACATGGTTATCCCAACCTATGTTGAAGGGGGTAGCTCTT  
 TGCCATTGACCGTTGTTGACCAAGATACTTACTTTACTTGGGAAGGCAAAAAGACATCTGCT  
 CAATACTACGTTAATAACGCCGGCGTCTCAGTTGAAGATGGGTGTATCTGGGGTACTTCTGG  
 ATCTGGTATTGGTAACCTGGGCACCATTAAACTTTGGTGTGGCTCCACTGGTGGAGTGACAT  
 ACTTATCATTGATTCCTAACCCAAACAACAGCGACGCATTGAACTACAACGTCAAGATAGTT  
 GCTGCTGATGATTCATCCAATGTCATCGGTGAATGTGTTTACGAAAATGGTGAGTTCTCTGG  
 CGGTGCTGACGGGTGTACCGTCTCTGTTACTTCCGGTAAAGCTCATTTCTGCTTTATAACAATT  
 AA

>YEL047C 1.76 Hot

ATGTCCTCTCTCCCGTTGTTGTTATTGGAACCGGTTTGGCCGGGCTGGCTGCTGCCAATGA  
 ATTGGTTAACAAGTATAACATCCCTGTAACCATCCTCGAAAAGGCTTCCCTCGATCGGTGGGA  
 ACTCTATCAAGGCCCTCCAGTGGTATTAACGGTGTGTCACCGAGACTCAACGTCACTTCCAC  
 ATCGAGGACTCCCCACGCTTATTTGAAGATGACACCATCAAGTCTGCTAAAGGTAAAGGTGT  
 CCAAGAATTAATGGCTAAGTTGGCCAATGATTCTCCCTGGCTATTGAATGGTTGAAAAACG  
 AATTTGATTTGAAATTGGACCTATTGGCTCAATTGGGTGGCCACTCTGTGGCAAGAACTCAC  
 AGATCGTCTGGGAAGTTGCCTCCAGGTTTCGAAATTGTTTCTGCCTTATCTAACAATTTGAA  
 GAAATTAGCTGAGACTAAACCAGAGTTAGTTAAGATTAACCTTAGACAGTAAAGTCGTAGACA  
 TCCATGAAAAGGATGGCTCCATTTCTGCTGTAGTGTACGAGGACAAGAATGGCGAAAAGCAC  
 ATGGTGAGTGCTAACGATGTCGTTTTTTTTGTTCTGGAGGGTTTGGCTTTTCTAAGGAAATGCT  
 TAAAGAATACGCACCCGAACTGGTGAACCTTGCCAACAACAACGGGCAACAACAACCTGGTG  
 ATGGTCAAAGGCTTCTGCAGAAGTTAGGCGCTGATCTGATTGACATGGACCAAATTCAGTT  
 CATCCAACCTGGGTTTATTGATCCAATGACCGTAGCTCAAGCTGGAAATTTCTGGCTGCCGA  
 ATCCTTAAGAGGCTTTGGTGGTATCCTATTAAACCTATTACCGGTAGAAGATTTGTCAACG  
 AATTGACCACAAGAGATGTAGTCACTGCAGCTATTCAAAGGTTTTGTCTCAAGAGGATAAC  
 AGAGCACTATTGGTTATGGGCGAAAAATGTACACAGATTTGAAGAATAATTTAGATTTTTA  
 CATGTTCAAGAACTTGTACAGAAATTGACATTTATCTCAAGTTGTTTCTGAATATAAATTTAC  
 CAATCACTGTGCGCCAATTATGCGAGGAATTGCAAACATACTCTTCCCTTCACTACCAAGGCT  
 GATCCGTTGGGACGTACCGTTATTCTCAACGAATTTGGCTCTGACGTTACTCCAGAACTGT  
 GGTTTTTTATTGGTGAAGTAACACCGGTTGTCCATTTACCATGGGTGGTGTGATAATCAATG  
 TCAAGGCTCAAGTCATTGGCAAGAACGACGAAAGGCTACTAAAAGGCTGTACGCGGCCGGT  
 GAAGTTTCTGGCGGTGTTTCATGGCGCCAATAGGTTGGGTGGTTCAAGTTTGTTAGAATGCGT  
 TGTCTTTGGGAGAACCGCAGCTGAATCTATTGCCAATGACCGCAAGTAA

>YIL057C 1.82 Hot

ATGACGAAAAGGATAAGAAAAGCAAAGGGTCCCTAAGATGTCCACCATCACTACAAAAGTGG  
 TGAGTCCTTAAAGTTTTTTGAGGATTTGCATGATTTTTGAAACATATTTAAAGGGTGAGACGG  
 AAGATCAAGAGTTCGACCATGTCCATTGCCAAGTGAAGTACTATCCACCCTTTGTCTGAT  
 GATGCGCATGATGATCCGGAAAAGATCAAAGAGACTGCCAATTCGCACTCTAAGAAGTTTGT  
 TCGCCATTTACACCAGCATGTTGAGAAGCACCTGCTAAAGGACATCAAAACCGCTATCAACA  
 AGCCAGAATTGAAATTCACGATAAGAAAAGCAGGAATCCTTTGACCGGATTGTTTGAAT  
 TATGGCGAAGAAACGGAGTTGAACGCCAAGAAATTCAGGTGTCTGTGCAAGTTGTATGTAA  
 ACACGATGGCGCAATGGTAGATGTTGATTACAAGACAGAACCCTTGCAGCCACTCATCTAA

>YBL045C 1.56 Hot

ATGCTAAGAACAGTAACCTCAAAGACTGTATCTAACCCAGTTCAAGAGGCTTTTGGCTACAGC  
 TGTAGCAACCCCCAAGGCCGAAGTAACGCAATTTATCTAACGGTATAGTTGTAGCCACTGAGC  
 ATAATCCTTCCGCTCACACAGCCTCTGTGCGGTGTTGTCTTCGGCTCCGGTGTGCCAACGAA  
 AACCTTATAACAACGGGGTTTCCAATTTATGGAAGAACATCTTTCTATCCAAGAAAACCTC  
 TGCTGTTGCCGCAAGGAAGGTTTGGCATTGTCTTCCAATATCTCCAGAGACTTCCAATCTT  
 ACATTGTATCTTCTTTGCCAGGTTCTACCGATAAATCACTAGACTTCTTGAATCAGTCTTTC  
 ATCCAACAAAAGGCTAATTTGCTATCTTCTTCTAACTTCGAGGCCACGAAGAATCTGTCTT  
 GAAGCAAGTTCAAGATTTTGAAGAAAACGACCATCCCAACAGAGTTTTTGAACATTTTACT

CCACCGCCTTCCAAAACACTCCATTATCTTTGCCTACTAGAGGTACTTTGGAGTCCTTGGAG  
AATTTAGTTGTTGCTGATCTGGAATCTTTTGCCTAATAACCATTTCTTGAATTCAAATGCTGT  
TGTTGTTGGTACCGGTAATATCAAACATGAGGATTTAGTAAATTCATCGAATCCAAAAACC  
TAAGTTTGCAAACCGGTACCAAGCCCCTACTCAAGAAAAAGGCCGCTTCTTGGGTTCGAA  
GTTAGATTGAGAGACGACACCTTGCCAAAGCGTGGATTTGCTGGCTGTGGAAGGTGAACC  
TGTCATTCACCAAATTTATTTGTTGCTAAATTAGCCGCCAAATTTTCGGCTCATAACAACG  
CCTTCGAACCCGCTTCTAGATTACAAGGTATCAAATTTGTTAGACAACATACAGGAGTACCAA  
TTATGCGACAATTTCAATCATTTCTCTCTTCTTACAAAGATTCCGGTTTATGGGGTTCTC  
TACGGCCACGAGAAACGTTACCATGATTGACGACCTCATCCATTTCACTTTGAAACAATGGA  
ACAGATTGACCATTTCTGTCACTGATACTGAAGTTGAACGTGCCAAATCGCTGTTGAAATTA  
CAATTAGGGCAGTTATACGAATCTGGTAATCCCGTCAATGACGCTAACTTGTAGGGCAGTA  
AGTCCTAATCAAGGGCTCCAACTGTCTCTGGGTGAGGCTTTCAGAAAAATTGATGCAATCA  
CAGTCAAAGATGTTAAGGCTTGGGCCGGTAAGAGATTATGGGACCAAGATATTGCTATTGCT  
GGTACAGGCCAAATGAAGGGTTATTAGATTACATGAGAATCAGAAGTGACATGTCCATGAT  
GAGATGGTAA

>YEL036C 1.51 Hot

ATGAAGTATAATAACAGAAAACCTCTCGTTCAACCCTACCACAGTAAGTATCGCTGGAACGTT  
GCTTACGGTGTCTTTCTCACAAAGACTCGTGCTTTCGTTCTTCTCGATATCGCTATTCCAGC  
TGGTAACTTTCCAAGGAATCTTCAAGCCCTATGTTCCAGATTTTAAAAATACTCCAGCGTA  
GAGTCTACGACCTACGAAATTACCAAGGCAACAAGATGGTTGGCAACAGGGTGACCGCAT  
CTTGTTTTTGCGTGCCACTGAGAGATGCTTCTGAGCATCTTCCCATGTTTTTTAACCATCTGA  
ATACCATGACATATCCGCACAACCTGATTGATCTGTGCTTTTTGGTGAGTGACTCTTCGGAT  
AACACCATGGGCGTGTACTATCCAATCTACAGATGGCGCAATCGCAACAAGACAAGTCCAA  
AAGTTTTGGTAAACATCGAAATCTATGAGAAGGACTTCGGCCAAATCATTGGTCAGTCCTTTT  
CTGATCGTACGGGTTTTGGCGCCAGGGCCCCAGAAGAAAGCTGATGGCCAGGGCTCGTAAT  
TGGCTTGGGTCCGTGGCCCTGAAACCATAACCCTCCTGGGTTTACTGGAGAGACGTGGATGT  
CGAAACCATCCCCACTACCATCATGGAGGATCTAATGCATCACGACAAGGACGTCAATTGTCC  
CCAACGTCTGGAGACCTTTACCAGACTGGCTGGGAAACATTCAACCCTACGATTTAAATTC  
TGGAAAGGAATCAGAAGGGGGTCTTCAATTGGCGGATTCCCTAGACGAAGATGCTGTCAATTGT  
GGAAGGGTACCCAGAGTACGCCACTTGGAGACCTCACCTGGCATAACATGAGAGACCCAAACG  
GTAATCCAGAAGACGAAATGGAATTGGACGGTATTGGAGGGTCTCGATTCTCGCGAAAGCT  
AAAGTATTGAGAAGAGGCTCACACTTTCTGCAATCTCCTTTGAAAAGCACGCAGAGACAGA  
AGCATTTCGGTAGGCTCTCCCGCAGGATGAATTACAATGTCATCGGCTTGCCCCATTATGTCA  
TCTGGCACATCTACGAACCTTCCAGCGACGACTTAAAGCACATGGCTTGGATGGCTGAAGAG  
GAGAAGCGGAAACTAGAAGAAGAGAGAATTCGCGAATTTTACAACAAGATCTGGGAGATTGG  
ATTTGAAGATGTCAGAGACCAATGGAACGAAGAAAGAGATTCAATCTTAAAAAACATTGACT  
CCACTTTGAACAATAAAGTCACTGTAGACTGGTCTGAAGAGGGAGATGGCTCGGAGCTGGTG  
GACTCAAAGGGTGACTTTGTCTCACCACAACCAACAACAACAACAACAGCAACAACAACA  
ACAACAGCAGCAGCAGCAACAGCAACAGCAACAACAGCTCGACGGCAACCCGAGGGGAAAC  
CTCTTGATGACAACGACAAGAACAAGAAAAACATCCTAAAGAAGTTCCATTAGACTTCGAC  
CCTGATAGAAACTAG

>YNL244C 2.38 Hot

ATGTCCATTGAGAATCTGAAATCATTTGATCCTTTTCGCCGACACAGGAGACGACGAAACCGC  
CACTTCAAACATATTCATATTCGTATCCAACAGAGAAATGGTAGAAAACTTTAACTACGG  
TGCAAGGTGTCCAGAGGAATATGATTTAAAGAGAATTCTTAAGGTCTTAAAGAAGGACTTT  
GCATGTAATGGTAAACATTGTCAAGGATCCAGAAATGGGGGAGATTATTCAGTTGCAGGGTGA  
CCAAAGAGCAAAGGTTTGCGAATTTATGATCTCCCAACTGGGATTGCAAAAAGAAGAACATTA  
AAATTCATGGGTTTTAA

>YCR025C 1.71 Hot

ATGTCGTCATTTGGACATCGAGCATTTTTTCAGCTGTTGTCTTTACTAGAAGGAGAACTTT  
GCATTCAAATAAAATTTGCGCAAAGAGGCAACATACCAAACCTCAATCCGGGTGGCCGGTTTCGAT  
GGCCGATTCGGTATCCGCGCGCACTTCCCCTAGAATCCCACGTGCACCCATACCATATGATC  
GTTAAATTACCGCACCCACGCACCCAACCGGGCTGTTTCTATGGCTGTGCTTGCATTGGAC  
AGGAATTCCTTTTTTGGGAAAGCCGGGAATAGGTCGCAATCGGGTAAAAATCAAAACAATTTT

CGCATTTC AACAGAGTAAAATCAAACAAC TATGAGAAAAAACAACAAACAGAAAGCAG  
AAAGCAGAAAGATGTCAATATAGACTTGTCACTGCGTAA

>YDL086W 2.08 Hot

ATGTTGATTACTGAGACCTTTCATGATGTGCAGACATCATA CGGCACCACTCTGCGTATATA  
CGTATATTCTCCTAAGATTGCAGGCTATCCACAAGCTAAGTTTCCTGGGGTGATTCTGTACA  
GTGAAATTTACCAAGTGACGGGTCCGGTTCGTCGTTTTGGTCAAAGAATTGCGTCTGAAGGT  
TACGTTGTGGTGGCACCTGCCATATACCACAAC TTTATGGGCCCTGAAGCGTTGCCCTATGA  
CGTGCAGGGTACCGATATTGGTAACGAGTACAAGATCAAGAAGCCGTTAGAATCATA CGATG  
AGGACAACAACTGTGTTGCGATCTACTTTCCAGTTACCCCAATTCGATGGTAAGAGAATT  
GGTTCACAGGAATGTGTTTAGGTGGCCATTTGGCTTTTAGAGCGCTCCTGGACAAAAGGGT  
TACCTGCGCAACCTGCTTCTTCCCTACCGACATCCATTCCAGAACCTTAGGTCTTGGCCAGA  
ACGATAACTCTTTGGAACGTGTTTCGAAGGAGTTGGGTAATAACCAAGAAATGGTTTTGATC  
TTCGGAACCTGCGGACCCCATGTCGACCCGCAAGGCCGCGATCTAATCAGAAAGACCCCTCAG  
AGACCACGGAGTAAAGTTTACGTTCTTGGAAATCCTGGCTGCCAGCATGCGTTCATCCGTG  
ACGAGTTCAGCAAGGGCAGGTTCGACTCCGCTATCACTCAAAGTTGTCTCGGCTTCTTGTTT  
GAGCAGTTCAACAGAAAATTGAGAATCGATTTGGGTGAATTTGTTCGATGACAATACACCTTT  
GGAGCACGTTTGTTAA

>YBL082C 1.67 Hot

ATGGAAGGTGAACAGTCTCCGCAAGGTGAAAAGTCTCTGCAAAGGAAGCAATTTGTCAGACC  
TCCGCTGGATCTGTGGCAGGATCTCAAGGACGGTGTGCGCTACGTGATCTTCGATTGTAGGG  
CCAATCTTATCGTTATGCCCTTTTGATTTTGTTCGAAAAGCATGCTGTGCAAGATTATCATT  
AAGAAGGTAGCTTACACAGAGATCGATTACAAGGCGTACATGGAGCAGATCGAGATGATTCA  
GCTCGATGGCATGCTGGACTACTCTCAGGTGAGTGGTGGAACGGGCCCGCTGGTGTATCCAG  
CAGGCCACGTCTTGATCTACAAGATGATGTACTGGCTAACAGAGGGAATGGACCACGTTGAG  
CGCGGGCAAGTGTTTTTT CAGATACTTGTATCTCCTTACACTGGCGTTACAAATGGCGTGTTA  
CTACCTTTTACATCTACCACCGTGGTGTGTGGTCTTGGCGTGCCCTCTCTAAAAGATTGCACT  
CTATTTACGTGCTACGGTTATTCAATGATTGCTTCACTACTTTGTTTATGGTTCGTCACGGTT  
TTGGGGGCTATCGTGGCCAGCAGGTGCCATCAGCGCCCCAAATTAAGAAGTCCCTTGCCT  
GGTGTCTCCGCAACATACAGTATGGCTGTGAGCATTAAAGATGAATGCGCTGTTGTATTTCC  
CTGCAATGATGATTTCTCTATTCTAATGACGCGAACGTAATCCTTACTTTGTTGGAT  
CTCGTTGCGATGATTGCATGGCAAGTCGAGTTGCAGTGCCCTTCTGCGCAGCTTTCCGCA  
ACAGTACCTGCATTTGCGCTTTAATTTCCGCGAGGAAGTTTATGTACCAATGGAGTATCAATT  
GGCAAATGATGGATGAAGAGGCTTTCAATGATAAGAGGTTCCACTTGGCCCTTTTAATCAGC  
CACCTGATAGCGCTCACCACACTGTTTCGTCACAAGATACCCCTCGCATCCTGCCGATTTATG  
GTCTTCCCTGTGCCATCCGCTGAGGAAAAATGCAGTGCTCAATGCCAATCCCGCCAAGACTA  
TTCCATTCGTTCTAATCGCATCCAAC TTTCAATCGGCGTCTATTTTCAAGTCCCTCCACTAC  
CAGTTTCTATCCTGGTATCACTGGACTTTGCC TATACTGATCTTTTGGTCCGGAATGCCCTT  
CTTCGTTGGTCCCATTTGGTACGTCTTGACGAGTGGTGCTGGAATTCCTATCCACCAAAC T  
CACAAGCAAGCAGCTATTGTTGGCATTGAATACTGTTCTGTTGCTTCTATTGGCCTTGACG  
CAGCTATCTGGTTCGGTTCGCCCTCGCCAAAAGCCATCTTCGTACCACCAGCTCTATGAAAA  
AAAGCTCAACTGA

>YGL035C 1.69 Hot

ATGCAAAGCCCATATCCAATGACACAAGTGTCTAACGTTGATGATGGGTCACTATTGAAGGA  
GAGTAAAAGCAAGTCCAAAGTAGCTGCGAAGTCAGAGGCGCCAAGACCACATGCTTGTCCTA  
TCTGTCATAGAGCTTTTTCACAGACTGGAACATCAGACGAGACACATGAGAATTCATACAGGT  
GAGAAGCCTCACGCGTGTGACTTCCCCGGATGTGTGAAAAGGTT CAGTAGAAGCGATGAACT  
GACGAGACACAGAAGAATTCATACAAAC TCCACCCTCGAGGTAAAAGAGGCAGAAAAGAAGA  
AGGTTGTGGGCTCTCCAATAAAATAGTGCTAGTTCTAGTGCTACCAGTATACCAGATTTAAAT  
ACGGCAAATTTTTACCGCCATTACCACAGCAACACCTATCGCCTTTAATTCCTATTGCTAT  
TGCTCCGAAAGAAAATTC AAGTCGATCTTCTACAAGAAAAGGTAGAAAAACCAATTCGAAA  
TCGGCGAAAGTGGTGGGAATGACCCATATATGGTTTTCTTCTCCAAAACGATGGCTAAGATT  
CCCGTCTCGGTGAAGCCTCCACCTTCTTTAGCACTGAATAATATGAACTACCAAAC T CATC  
CGCTTCCACTGCTTTGTCTTCGTTGAGCAATAGCCATAGTGGCAGTAGACTGAAACTGAACG  
CGTTATCGTCCCTACAAATGATGACGCCCATTGCTAGCAGTGCGCCAAGGACTGTTTTCATA

GACGGTCCTGAACAGAAACAACACTACAACAACAACAAAATTCCTCTTTCACCACGTTATTCCAA  
 CACTGTTATATTACCAAGGCCGCGATCTTTAACGGATTTTCAAGGATTGAACAATGCAAATC  
 CAAACAACAATGGAAGTCTCAGAGCACAACTCAGAGTTCGTACAGTTGAAGAGACCAAGT  
 TCAGTTTTAAGTTTGAACGACTTGTGGTTGGCCAAAGAAATACCAACGAATCTGACTCTGA  
 TTTTACTACTGGTGGTGAGGATGAAGAAGACGGACTAAAGGACCCGTCTAACTCTAGTATCG  
 ATAACCTTGAGCAAGACTATTTGCAAGAGCAATCAAGAAAGAAATCTAAGACTTCCACGCC  
 ACGACAATGCTAAGTAGATCCACTAGTGGTACGAATTTGCACACTTTGGGGTATGTAATGAA  
 CCAAATCACTTGCATTTCTCCTCATCATCTCCTGATTTCCAAAAGGAGTTGAACAACAGAT  
 TACTGAACGTTCAACAACAGCAGCAAGAGCAACATACCCTACTGCAATCACAAAATACGTCA  
 AACCAAAGTCAAAAATCAAAAATCAAAAATCAAAATGATGGCTTCCAGTAGTTCGTTAAGTACAAC  
 CCCGTTATTATTGTCACCAAGGGTGAATATGATTAATACTGCTATATCCACCCAACAAAACC  
 CCATTTCTCAGTCGGATTCACAAGTTCAAGAACTGGAAACATTACCACCATAAGAAGTTTA  
 CCGTTGCCCTTCCCACACATGGACTGA

>YCL011C 1.54 Hot

ATGGAGAGAGAGCTAGGGATGTATGGAAATGATAGGAGTAGATCAAGATCACCTGTACGTCCG  
 TCGTTTGAGCGACGACAGAGACAGGTACGATGATTATAACGATAGTAGCAGTAATAATGGTA  
 ATGGCAGTCGTCGTCAGAGACGCGACCGAGGCTCCCGTTTCAATGATCGGTACGATCAGAGT  
 TATGGTGGCAGCCGCTACCACGATGATAGGAACTGGCCCCCTCGCCGAGGAGGCCGTGGCAG  
 AGGAGGAAGCAGATCATTACAGAGGGGGACGCGGTGGCGGTAGGGGTCTACTTTAGGTCCAA  
 TTGTTGAAAGAGACTTAGAAAAGCAATTTGACGCGACCAAGAGAAATTTTGAAAATAGTATC  
 TTCGTGAGAACTTGACTTTTTGATTGTACCCCTGAAGACCTTAAGGAATTTGTTTGGTACAGT  
 GGGCGAAGTTGTGGAGGCTGACATTATCACATCAAAGGGCCATCACCGTGGTATGGGGACTG  
 TGGAAATTTACCAAAAACGAATCTGTCCAAGATGCCATATCGAAGTTTGATGGTGCCTCTTT  
 ATGGACCGGAAACTAATGGTAAGACAGGATAATCCTCCTCCTGAAGCTGCCAAGGAATTTTC  
 TAAGAAAGCTACTAGGGAAGAAATAGATAATGGGTTTTGAAGTGTTCATCATCAATTTACCGT  
 ACTCTATGAATTTGGCAATCCTTAAAAGATATGTTTTAAAGAATGTGGTCATGTCTTGCGTGCC  
 GATGTAGAATTTGGATTTCAACGGATTTTCAAGAGGATTCGGTTCTGTCAATTTATCCTACTGA  
 GGATGAAATGATTAGAGCTATCGATACATTCAACGGCATGGAAGTAGAAGGTAGAGTTTTGG  
 AAGTTAGAGAAGGGCGTTTTCAACAAGAGAAAGAACAATGATCGTTATAATCAAAGGCGTGAG  
 GACCTTGAAGATACCAGAGGTACTGAACCAGGTCTTGCGCAGGATGCCGCTGTCCACATTTGA  
 TGAACCTGCAGCAAAATTTACTGAAGGTGTCAATCCAGGAGGGGATAGAACTGTTTCATTT  
 ATTTAGTAATTTACCATTCTCAACAGCAAGAAGCGATTTATTCGACTTGTGGGCTATC  
 GGCAAAATCAATAACGCGGAATTTGAAACCACAGGAAAATGGTCAACCAACTGGTGTGCTGT  
 TGTAGAATATGAAAATTTAGTAGATGCAGATTTTTTGTATTCAAAAATTAATAATTATAATT  
 ATGGTGGTTGTAGTTTACAGATCTTTATGCTAGACGTGATTAA

>YLR080W 1.56 Hot

ATGACTACAAGAAAGACAGCTTCCTCTCTTCAGCTTTTAGGGAAAATCACAGGAACAAAAGC  
 TGGAACTAAGCAAAAAGAAGATGAATTTTCAATTAATGGACTGATATGGTTATATATGTGTGTGT  
 GGATGGTACACGGAAAAGTGACGCAGAAGGATGAATTTGAAATGGAATAAAGGATACTCGCTA  
 CCAAATTTGCTAGAAGTGACAGATCAGCAAAAAGAAGCTTTCACAATGGACTTTGGGGTGACAA  
 AGTAAAACCTGAAGAAGGGAGGTTTTGTTTTAACTCCTGGAAAGAACACAAAGGGTTCATTT  
 GGTGAAACCTGAATATTCAATAAAGGATGCAATGACAATAGAGTGGACGTTTAGAAGTTTC  
 GGGTTCAGAGGCAGCACAAAGGGGGTCTTGCATTTTGGCTGAAGCAAGGAAATGAGGGAGA  
 TAGTACCGAGTTATTTGGTGGAAAGTTTCGAAGAAGTTTAAATGGTTTTGATGATATTGTTACGAT  
 TAGACGATAAGTTGGGAGAGAGCGTGACAGCGTATTTGAATGACGGAACAAAAGATCTTGAT  
 ATTTGAATCCTCACCGTACTTTGCGTCATGTCTGTTCCAATACCAGGATTCATGGTACCATC  
 AACATTAAGATTGACTTACAATCCACTAGATAATCACTTGTAAAGTTGCAAATGGACAACA  
 GAGTGTGTTTTCCAGACAAGGAAAGTTAAATTTATGGGCAGCAGCCATTTAGGATTGGAACA  
 AGTGCATCAACGATGCATCCAAAGAATCGTTTGAATCTTGAATAATGAAGCTTTATGACGG  
 AGTTATAGAGGATTCGCTAATTCCTAACGTGAATCCTATGGGACAACCCAGAGTGGTTACTA  
 AAGTGATCAATCTCAAACCTGGTGAAGAGAGTTTTAGGGAAAAGATGCCATTTTCTGATAAG  
 GAAGAAAGTATAACGAGTAACGAGCTTTTTCGAAAAGATGAACAAGTTGGAGGGGAAAATCAT  
 GGCAAATGATATCGATCCATTACTCCGCAAGATGAACAAGATTGTGGAGAATGAACGTGAAC  
 TGATTTCAACGTTTAAAGACCTGTTAGATCTGAAGAAAACAGCCATAAGTGACGATAGTTTC  
 CAAGATTTTCTTTCGATGAACGCAAACCTGGACAGATTGATAAAAAGAACAAGAAAAAATTCG

ACAAGATGCCAAGCTGTATGGCAAGCAGACCAAAGGTCATGATGAGATATTTTCCAAAATAA  
GTGTATGGTTGGCACTGCTGATTTTCATTATGATCACATTGGCGTACTACATGTTTAGAATT  
AACCAAGACATCAAGAAGGTCAAACCTTCTGTAA

>YLR212C 1.59 Hot

ATGGGTGGAGAAATTATTACTTTGCAAGCAGGTCAATGCGGGAACCACGTTGGTAAGTTTCT  
CTGGTCTCAATTGGCGAAAGAACACGCTATAGGCACCGATGGGCTATCTCAGCTTCTGATT  
CCAGTACGAAAGAGATGATGACACAAAGCCTTTCTTCCGCGAAAACAGTAGGAATAAGTTT  
ACGCCAAGGGCTATTATGATGGATTCCGAGCCTAGTGTTCATCGCCGACGTGGAGAACACATT  
TCGTGGGTTTTTTGACCCAAAGAAATACCTGGGTAGCTTCTGATGGCGCTAGCGCTGGTAATT  
CTTGGGCCAATGGGTATGATATAGGAACCTGTAACCAGGATGATATTCTTAACAAGATCGAC  
AAGGAGATTGATTCTACCGACAATTTGAAAGTTTCCAGTTGCTGCACTCAGTAGCCGGAGG  
GACCGGTTCCAGGGCTCGGATCCAACCTCTTAGAAGCGCTGTGTGATCGATATCCTAAAAAAA  
TACTCACGACATATTCTGTGTTCCCTGCAAGATCTTCTGAGGTTGTTGTTCAATCTTATAAC  
ACTATTCTGGCTTTGAGAAGACTGATAGAAGATAGCGATGCAACGGTGGTGTGTTGATAACGC  
TTCGTTGCTGAATATTTCCGGTAAAGTGTGTTAGAAATCCGAACATCGATTTACAACACACGA  
ATCAATTGATATCGACCATAATATCTTCCAGTAACGAACAGTATACGGTTTCCGAGTTACATG  
TATTCATCCATGTCAGTATTTACTCTACCTTGATTCCCTTCTCCTGAACTTCATTTCCTAAG  
CCCTAGTTTCACTCCATTTACATCAGATTATATTACGATGATATAGCGCATAAAGGCCATT  
CCAGTTATGACGTCATGTTAGATTTATTAGACCCTTCCAATTTCTTGTCTCTACCGCGATG  
AACCAATCCAACATATTTTAAACGTTTATAATACAATCATTGGTAATGTAGAACCCTCGTCAGAT  
ATCGCGTGCTATGACCAAATTACAACAACGCATCAAATTTCCCTCATGGTCTCTTCTGCGA  
TGCACGTTAAACATTGGAAGAAGATCGCCATACTTGCCTTTACAACCAAATGAAAACGAAGTT  
AGCGGCATGATGTTAAGCAATATGTCTACCGTGGTGAACGTCTTTGAGAATGCGTGCAATAC  
TTTTGACAAAGTATTTGCCAAGGGCGCATTTTTAAATAAATTATAATGTAGGCGACTTGTTC  
AATCAATGCAGAACGTTCAAGATGAATTCGCCGAGTCAAGAGAAGTAGTACAAAGCCTGATG  
GAGGATTATGTAGCTGCAGAACAAGATTCGTACTTTGGACGATGTACTTGTGATGATGAAAA  
TATGGTTGGCGAGTTGGAAGAGGACCTGGATGCCGACGGTGATCATAAATTAGTATAA

>YFR038W 1.57 Hot

ATGAGCAGATGCTCAAACCGGGCGCTGATGACTGTTGTTGAGGATGCTGTTGGGGCCAGGGT  
GGCTGCAAGGACGAGAAACATGAGCAATGGCGTCAATTACCGGGAGAAGGAAGTCAATGACC  
TAACGGCTGACATTTTCAGATTCAGATTCAGATTTGGATTTCAGAGGACAATAACATGGCAA  
GGCGACAATGACACTGCCCCCATATGGTTACAAGATGATGTGCATTCAGACGAAGATATTCA  
GCTGGACTCAGAGGACGATTCCGATACAGAAGCTGTTCAAGCCCAAGTGGTGGATAAATTGG  
CAAAGACACGAAATCAGAGCAAAAATCCTTGGATGATGAGCTCTCCGAGATGGATACCAAG  
ACGGTTTTCTTTAAAACCTTAAGAACTAAACGAGTTTGTGAGGCAGAGTCAGGTATATTCCAG  
TATAATCGCCGATACTTTACTACATCGATCTAATGAAGTGGCTAACGCTAATACAAAAGATA  
ACAGCAACTCTGATGATGAAGAACATTCTTCAAAAAAACGTAAAACAAAAAATAAATAA  
ACAGATTTCTTCAAAAAACAGAAAAAGAAGATAACAACCACCCAAAACGGCGCACCAGA  
CGATGCAGCAATAAAGCAACCTCGCCTATTGAAAACTGTATTTTAAAACCTTACCAACTAG  
AAGGTCTTAACTGGCTGATCACTCTTTATGAAAATGGCCTGAACGGAATCTTGGCCGATGAA  
ATGGGTCTTGGTAAGACTGTTCAAAGTATTGCTCTTTTGGCGTTCATATATGAAATGGACAC  
AAAGGGTCTTTTCTAGTGACTGCACCATTAAGCACCCCTAGATAAATTGGATGAACGAATTTG  
CAAATTCGCTCCTGATCTACCAGTTCTAAAATATTATGGGACCAATGGTTATAAGGAACGT  
TCTGCCAAGTTGAAAAATTTCTTTAAACAACACGGCGGCACGGGGATCGTCATCACATCATA  
TGAAATTTTAAAGAGATAACCGACTTAATCATGAGTCAAATTTGAAATTTTTAATTGTTG  
ATGAAGGCCACCGTCTGAAAAATATAAATGTTAGATTGATTAAAGAGTTAAAAAATAAATCAAT  
ACTTCCAATAGACTGCTACTAACAGGGACGCCTTTACAAAATAACCTAGCTGAATTATGGTTC  
ACTTTTGAATTTCAATATGCCGATATCTTTGCCGATTTTCGAGATATTCAATAAATGGTTTG  
ACTTCGACAGCTTAAATTTAGGCTCCGGTCCAACTCTGAAGCATTGAATAAGTTAATCAAC  
GATGAACTACAGAAAAATTTGATTTCCAATTTACACACAATTTCTGAAACCATTCTTTTGGAG  
AAGATTGAAAAAAGTTGTTTTGGCTAATATCTGCCGCCAAAGAGAGAAATATATCATAAATT  
GTCCGATGACGCTGTCACAGGAAAAATCTATAAGGCTGGATTGAATGGAAAGTTGAAAAAA  
ACCATGTTCAAAGAATTAATCAAGGATTTTTTCACATTGAACGATGAATACATCGGCCACGT  
TTCTAATCGGTCCATACGAGATTTTCATCAATTTATAAATCTGTTAATGAACTTCAAATA  
CAGACAATAAATAAATCAATCCAACCTTGTGCAAATGGACAAACTATATAAGAAGAACCTGCAA

ATGGAATTTCAAATAAGAAATGCAAAATATGATGATGCAATTGAGACAAATCATTGACTC  
 AACTTTTTTGTTTTATTTCCCATATTTACACCCAGAAGACTTGACTTTGGAACTCTTTTAA  
 AGACGTCTGGGAAATTACAAATCTTACAAAAATTAATCCCCCATTAATATCTGAGGGGCAC  
 AAAGTGCTTATTTATTCTCAGTTTGTAAACATGCTCGATTTGATCGAAGATTGGTGTGATTT  
 AAATTCGTTTCGCGACATTTTGAATTGATGGTTCAGTAAACAATGAAACAAGAAAGGATCAAC  
 TCGAGAAGTTTAATAGCTCGAAAGATAAGCATAACATTTTCCATTGTCCACAAGGGCGGCA  
 GGACTGGGTATTAATCTAGTCGGGGCAGATACAGTTGTCTTGTTTGATAGTGATTGGAATCC  
 ACAGGTGGATTTACAAGCCATGGACAGGTGTCACCGTATTGGCCAAGAATCACCGGTTATAG  
 TATATAGGTTGTGTTGTGATAACACCATTGAACATGTTATATTGACCAGAGCGGCCAATAAG  
 CGAAATTTGGAAAGAATGGTTATCCAGATGGGAAAATTCATAACCTGAAAAAATTGGCGTT  
 AAATGAAGGTTCTTTTTTGAAGGCAAACAAAGCGGGTGTAAATGTCACTAATAAGGACTTAG  
 TCCAGGAGTTATCTATGCTTTTAAATGAGCGATGAATCCAATATAGGCTTTGAAAATGGGGGA  
 CAGAAAGAAAATAAGGCTACTGAGGGCCAACACTGACTGATAAGGAGGTTGAAGAATTGACCAA  
 CAGATCTCTTGAAGCGTACAAGGCCAACAGAGTCGTAGATCTGCCGCACGTCAAGCTATTTG  
 AAACAACCTCCGGTCTTTAA

>YIL118W 1.62 Hot

ATGTCATTTCTATGTGGGTCAGCTTCAACGTCAAATAAACCGATCGAAAGAAAGATCGTTAT  
 TTTGGGCGACGGTGCCTGTGGTAAAACCTTCGTTGCTGAATGTTTTACCAGAGGTTATTTTC  
 CCGAAGTTTATGAGCCTACTGTTTTTGAAACTATATCCATGATATTTTCGTTGACAGTAAA  
 CATATCACGCTATCGTTGTGGGATACTGCGGGCCAAGAGGAATTTGACAGGTTACGATCCTT  
 GTCTTATTCAGATACGCAATGTATAATGTTATGTTTCAGTATTGATTCACGCGATTCTTTAG  
 AAAATGTCCAAAAATAATGGGTGGGTGAAATCACTGATCATTTGTGAAGGCGTCAAGTTAGTC  
 TTAGTTGCACTAAAGTGTGACTTAAGAAAACAATGAAAATGAATCTAACGCAATCACACCGAA  
 CAATATCCAACAGGATAACAGCGTTTTCTAACGACAACGGAAATAACATAAATAGCACCTCAA  
 ACGGCAAAAACCTGATAAGTTATGAAGAAGGTCTAGCTATGGCTAAAAAGATCGGTGCGCTA  
 CGTTATTTGGAATGTAGCGCTAAGCTGAATAAAGGTGTCAACGAAGCTTTCACAGAAGCCGC  
 AAGAGTTGCTTTAACC CGGGCCAGTAGCAACCGAAGTGAAAAGTGACAGTGGATCCAGCT  
 GTACCATTATGTAA

>YNL305C 1.89 Hot

ATGTCAGGTCCCTCCACCTCCTTACGAAGAGCAAAGCTCACATCTTTACGGCCAGCCTGCGAG  
 CAGCCAGGATGGAAACGCTTTCATCCCGGAAGACTTTAAATATTCACGCGTGGTTATCTCGT  
 GCGAACCATCATTCGCCAGCGTTTTATGCACAAGGTTTACTCTCTGCTGTATGCCAGTTA  
 CTGGCCAGTTTGTCTGTTCTGCTACTGGGCTAGCGTTTTCCACTTCTTTGCAGAACTTTATCAT  
 GTCGCATATCGCCCTCTTCTACATCTGCATGGTGGTATCGCTAGTATCGTGCATTTGGCTGG  
 CAGTAAGTCCCTCGTCCCAGACTACGAGGCCAGTGTCCCAGAACCGTTGCTCACGGGCAGC  
 AGCGAAGAGCCGGCACAAGAGCAAAGGCGTCTGCCTTGGTACGTCTTGTCTCGTACAAGCA  
 AAAGCTCACGCTGCTCTCCATTTTCACTCTTTCCGAGGCTTACTGTCTGCTGCTGGTAACCT  
 TAGCGTACGATAAGGATACAGTACTTTCCGCTCTGCTGATCACCACCATCGTCGTAGTCGGC  
 GTTTCCTTGACCGCACTATCAGAGAGATTTCGAGAACGTGCTGAATTCCGCAACGTCAATATA  
 CTATTGGTTAAACTGGGGTCTATGGATTATGATCGGAATGGGTCTCACGGCCTTGCTTTTCG  
 GCTGGAATACCCACTCTTCCAAGTTAATCTGCTTTACGGCTGGCTTGGTGCCATTTTATTT  
 ACCGCGTATCTTTTCATCGATACGCAACTGATTTTTAGGAAAGTGTATCCTGATGAAGAAGT  
 TAGATGCGCCATGATGCTTTACCTGGACATCGTCAATTTGTTTTTGTCTATTTTAAAGGATTT  
 TGGCCAACTCTAACGACGACAATTA

>YDR051C 1.75 Hot

ATGTGTGAAGAGAATGTTTCATGTTAGTGAAGATGTTGCTGGCAGTCACGGTTCTTTTACGAA  
 TGCCAGACCTAGGTTAATTGTACTAATAAGGCATGGGGAAAGCGAATCAAATAAAAACAAGG  
 AGGTCAATGGTTATATTCCTAACCATCTGATTTCTTTAACGAAAACAGGTCAAATCCAAGCT  
 AGACAAGCTGGTATTGACTTATTACGTGTTTTAAACGTAGACGATCACAACCTTGGTGGAGGA  
 TTTGGCTAAGAAGTATATTAAGATGAAAGTAGCAGGAGAACCTTACCCTGAAGGACTATA  
 CCAGGCTGAGTAGAGAAAAAGACACAAACATAGTTTTTTTATACATCACCCATAGAAGAGCA  
 AGGGAAACATTGAAAGGTATTTTGGACGTCATCGATGAATATAATGAATTAACAGTGGTGT  
 TCGTATATGTGAAGATATGAGATATGATCCACATGGTAAACAGAAACATGCATTTTGGCCGA  
 GAGGACTTAATAATACTGGTGGTGTTTACGAAAATAATGAAGATAATATTTGTGAAGGGAAG

CCTGGAAAATGTTATCTGCAATATCGGGTTAAGGATGAGCCAAGAATAAGGGAACAAGATTT  
 TGGTAATTTCCAAAAAATCAATAGCATGCAGGACGTTATGAAGAAGAGATCTACGTATGGTC  
 ATTTCTTCTTCAGATTCCCTCATGGAGAAAAGTGCGGCAGATGTATATGACAGAGTCGCCAGT  
 TTCCAAGAGACTTTATTCCAGGCACTTCCATGATAGGCAAGAGAGAAGACCCAGAGATGTTGT  
 TGTCCTAGTTACACATGGTATTTATTCCAGAGTATTCCTGATGAAATGGTTTAGATGGACAT  
 ACGAAGAGTTTGAATCGTTTACCAATGTTCCTAACGGGAGCGTAATGGTGATGGAACCTGGAC  
 GAATCCATCAATAGATACGTCTTGAGGACCGTGCTACCCAAATGGACTGATTGTGAGGGAGA  
 CCTAACTACATAG

>YOL053W 2.11 Hot

ATGTGGGGTTATGCAAGAAGCATTTCGAGCAATAAAATTCAGTGCAGGAGAGAAACAA  
 AGCATTAAACCAGAAAGAGTGGCAGCGAACATAAGACAAAGCAACTGTTTCCTGTATTCA  
 ATTGCAAGAAGAAGGAAAAAGGGTAATGATACGGTTTTCGATTCTACGTAATGCTAACACA  
 TCTCTACTGTCCGCGAGAAGTATATGCTTATTTACCCAGGCGCCTACCTATTGTCATGTAAG  
 GTTGAATACCTTGAATAAAAGCATTACAATAAAAGAAATTCATTGACAGAGTCGAAAAGGC  
 ATGTCCATGATGGCAAGCATTTCCTTACGACGCCACATCAACAGCAACAGACGAAGTTGGGG  
 GAAATTGAAGAGGGACACAGTCCTAACATAAAAGGAGAGGACTTGAGAAGCATTGGTCAAGC  
 AATAACACATCAGCGAAACAAGCGCCGAAAGCAAATATGGTCCGCCATATTTGGTGGTATAT  
 TCGGTGTGATATTAGGATACTACTAATCTATAGAGTGATATATTTAAAGGAACAAAGTTTC  
 TTACCATTGTTTCCATCATCCAAGATACGTAAACTGAGTACCAGAGATTTGAAAAAGGTTGA  
 CGTAAACCAAGTACAGAAGCTTCTAAATTAAGGGTTTGTAGAGATATTATCCGGTCATGACA  
 TGATCAAGGAACAATACGGAGTACCATTGCTTGATAAAGATGGCAATTCACCCACGTTAAAT  
 GAATTCAGCATGTGGTGCAGAAAGATCAAGATCCATGTGTAACCTGGTATTGTAATGGAGCCAGA  
 CGATAAAAGGGATAGTTTCGCACACTTGGTATAGAATACCCCTTTGTTTGCAAATGGAGGATAA  
 CGCATCGGCCAATAAGTATACGGGGAACCATCGACGATTTACTGAACCCGATTGGTTTGGAA  
 ACAGCCGATTTATTTGAGATTATATCGCCGGAGAGGGTATACGGGTTCGTTCAAGTACGAATA  
 CCCACTGCAGGGGGACTCACATGCATTACACCTTTGGTTTCATGGCGAAATCGAACTGGACG  
 ATGATTCCTTTGATTGTATATAATGGAAAATACCACGTTGATGTTAAATGCAAGAAATCGAC  
 CTCTTCAGACGTGAAAAGAACGGACAATAACAGTACGTTCTATACAAAAACGAAGCGGG  
 CGACAAGTAA

>YBL016W 2.12 Hot

ATGCCAAAGAGAATTGTATACAATATATCCAGTGACTTCCAGTTGAAGTCGTTACTGGGAGA  
 GGGTGCATACGGTGTGGTATGTTCTGCAACGCATAAGCCACGGGAGAAATCGTGGCAATAA  
 AAAAGATCGAACCATTCGATAAGCCTTTGTTTCGATTACGTACGCTGCGTGAATAAAGATC  
 CTGAAGCACTTCAAGCACGAAAATATCATAACAATCTTCAACATTCAACGCCCTGACTCGTT  
 CGAAAACCTTCAATGAGGTCTACATAAATCAAGAGCTAATGCAGACAGATTTACACCGTGTA  
 TCTCCACCCAGATGCTGAGTGACGATCATATACAATATTTTATATACCAAACCTTGAGAGCA  
 GTGAAAGTGCTGCATGGTTTCGAACGTATCCATCGTGATTTAAAGCCCTCAACCTTCTCAT  
 AAATCCAACCTGTGACTTGAAGTATGTGATTTTCGGTTTAGCAAGAATCATTGACGAGTCAG  
 CCGCGGACAATTCAGAGCCCACAGGTCAGCAAAGCGGCATGACCGAGTATGTGGCCACACGT  
 TGGTACAGGGCGCCAGAGGTGATGTTAACCTCTGCCAAATACTCAAGGGCCATGGACGTGTG  
 GTCTTGCAGATGATTTCTCGCTGAACTTTTCTTAAGACGGCCAATCTTCCCTGGCAGAGATT  
 ATCGCCATCAACTACTACTGATATTCGGTATCATCGGTACACCTCACTCAGATAATGATTTG  
 CGGTGTATAGAGTCACCCAGGGCTAGAGAGTACATAAAGTCGTTCCCATGTACCCTGCCGC  
 GCCACTGGAGAAGATGTTCCCTCGAGTCAACCCGAAAGGCATAGATCTTTTACAGCGTATGC  
 TTGTTTTTTGACCCTGCGAAGAGGATTACTGCTAAGGAGGCCTGGAGCATCCGTATTTGCAA  
 ACATACCACGATCCAAACGACGAACCTGAAGGCGAACCCATCCCACCCAGCTTCTTCGAGTT  
 TGATCACTACAAGGAGGCCTAACGACGAAAGACCTCAAGAACTCATTGGAACGAAATAT  
 TTAGTTAG

>YJR073C 2.33 Hot

ATGAAGGAGTCAGTCCAAGAGATCATCCAGCAACTCATCCACAGTGTGATTTACAGTCTTC  
 CAAGTTCCAGCTGGCCATTGTGTGCACGATGTTCAATCCTATCTTTTGGAACATCGTTGCAA  
 GAATGGAATACCACAAGCATTCTCTACCAAGATGTGTGGTGGGGCCAGAAAGGGCTGTTAC  
 ATGTTGGCGGCGACCATATTTTCGCTAGGTATCGTCAGAGACATGGTGTACGAGTCTGCATT  
 CCGTGAACAGCTACGTGTTCTCTGATCACGGGCGAGAAGTGGACCAAGCTGGGTGTGGCTC



TCTTTGGTTTGGGGCAAGTGCTTGTGTTTTGAGTTCCATGTACAAGCTGGGTATCACAGGGACG  
TACTTGGGTGACTATTTTCGGCATCCTGATGGATGAGAGAGTCACCGGCTTCCCCTTCAACGT  
TTCCAACAACCCCATGTACCAGGGTCCACTTTGTCTTCTTGGGCATAGCCCTTTACAAAG  
GAAAGCCTGCGGGGCTGGTTGTTTCTGCCGTAGTTTACTTCATGTACAAGATCGCTCTTCGT  
TGGGAAGAACCTTTTACTGCCATGATCTACGCTAACCGTGATAAGGCCAAAAAGAATATGTA  
A

>YCL010C 1.56 Hot

ATGGACGGATATTGGGATGTTGTAGTGTCTGTCCTTGCAAGACATATACAATGCCAACGAGGT  
CATTCCTTTGATGATGAGCTGCAAACAAAAAACTAAATTTCCCTTAATATGTCAAAGGATC  
AGCTGCAATTGCATCTCAACACTTTCCAAGAACACATGGAAAACGTCAACAGAGTGCACCGA  
ATCCTTGACAATGTACGTTCCAATTTGTCTGTTGATGTTGAATCAGTCACGAGAGGAAAAGAG  
TGAGGAAAATACTGAAGATGCAGAAGAAGGAGAAGGGACACGCATGGCATTTGTCTGAGGGCA  
AGAAAGCTGTGGGGAAAGTTGGCAGATCGTACTGGACCAGCGAATACAACCCAAATGCACCT  
ATTTTGGTGGGCTCAGAGGTTGCCATAAAGCCAGAAGGGGCAGTGCCGACGGCGAATGGAT  
ACAGTGTGAAGTACTCAAAGTCGTAGCAGATGGTACACGATTTGAAGTGAGAGATCCTGAAC  
CTGATGAATTGGGCAACTCAGGCAAGGTGTATAAATGTAATCGGAAAGAACTACTGTTGATC  
CCGCCAGGCTTTCCACTAAGAACTACCCGCCAGGTTACTAAGGTTCTGGCAAGATATCCTGA  
AACGACCCTTTTATCCTGCAATTGTCATCGGAACCAAGAGGGACGGCACTTGCAGGCTTC  
GATTTGATGGTGAAGAGGAAGTGGACAAAGAGACGGAAGTGACTCGCCGTCTAGTGCTGCCT  
TCGCCAACGGCTTTGGCAAACCTAGCAAGGAAATAG

>YNR041C 1.59 Hot

ATGTTTATTTGGCAGAGAAAGAGTATTTTACTAGGGAGGTCCATTCTGGGCAGCGGCCGAGT  
TACCGTTGCTGGAATCATTGGAAGCAGCAGAAAGAGATATACGTCTTCTTCCCTCCTCCTCCT  
CCTCCCCTTCCCTCGAAAGAATCAGCACCTGTGTTTACGTCGAAAGAGTTGGAAGTTGCAAGA  
AAGGAAAGATTGGATGGACTGGGACCGTTTCGTGTCTCGGCTGCCTAAGAAATGGATACCGTA  
TGCGGAGCTGATGAGGCTAGAGAAACCCGTGGGCACGTGGCTGTTATATTTGCCCTGCAGTT  
GGTCTATACTTATGGGAGCCATGATGCAAGGTGCTACATTGAGCGCAACAGCTGGTATGTTG  
GGTATTTTTCGGTGTAGGTGCATTTGTAATGAGAGGTGCTGGCTGCACCATCAACGATTTTTT  
GGATAGAAAGTTGGATCAAAGAGTTATCAGGTCCGTTCGAGAGGCCTATCGCCTCTGGTAGAG  
TGAGCCCCCGTCGGGCGTTAGTATTCTTGGGGGCTCAAACCTCTTGTGGAATGGGCGTTCTA  
TCTTTGCTTCCCTGCGCAGTGTGGTGGCTAGGCCTTGCAATCGTTACCTATTGTGTTTACATA  
CCCTTTGTTTAAAGCGTTTACGTACTATCCTCAAGCTGCATTAAGTGCATGTTTCAATTGGG  
GAGCGTTACTTGGGTTTCTGCCATGGGTGTAATGAGCTGGCCTACAATGATACCTTTGTAC  
CTGAGCAGTTACTTGTGGTGTATGACTTACGATACTATATACGCACACCAGGATAAAAAAGTT  
TGACATCAAGGCTGGAATCAAGTCTACCCTTTGGCTTGGGTTCCACGCACAAAGTCTATCA  
TGAAGGCCATGTCCGCGTCTCAAATCGCACTGTTAGCTGTCGCCGGCTTGAACAGTGGGTTG  
TTATGGGGGCTGGGTTTCAATTGGTGGACTAGGAGTCTTCGCTTATAGACTCTTCAGCATGAT  
AAAGAAAGTGGATCTTGACAATCCTAAAAACTGCTGGAAGTATTTTAAATGCAAATATCAACA  
CCGGACTTTACTTTACGTACGCCCTTGGCAGTCGACTACATCTTGAGACTGTTTGGATTCTTG  
TAG

>YOL047C 1.72 Hot

ATGTCGACTAGACCCCAACCTGATTGGTATTACCATAGACATCCATATGCCTCTACGCCACT  
GGCAGAAGGGGAGGAACCACAATTACTCCCCATCCAAGACCAAGGGAACCATAAGAAATCAA  
AAATTTGGATGGCATAACAAGGCTCCGATAGTTCGATGGTACAAGAATGCTATGCTTGTAA  
GACAAATTTTGGAAAGACCTAGAGTCGTGCGCACCAGATCATCTGGTATCCGTATAAAGGAAT  
TAGCGAATCCGTGGGAAACTCGGATTATTTGCATCTATTTTCCCTAATATTTGGATACTACC  
TGCTGAATCTCCTGCTTATTGTTGCGTTTACGTCAATCCTTGCCTGGTCCCTTGTAGTGTGC  
ATCTATTTGCCCTTCTCGGACTCTTTGCGTTACCTCTGGCTTATATGCAAACCTATTCTGAT  
TTCCACAACGCTATGTAATTCTATGGTGAAGGGTACCGATTTTCGTTCTTTTACACGATTTT  
ATGGAGTGACGTTTCGCAAGAAAGGGATTAACAGAGTTGAGTGAAGCCTGTGAAACGATAAGT  
TTCACGCCCTTTGTCTACAGAAGGTCACATCGTTTGGGTGGCCTCTTTTCGAAACGGTTTTA  
CCTCGTCTCTTTGCCGAGTTTTTCAATTTTTTCTTCTGGTACATCTTCATAGCCTTTATGT  
TTCTTTTATTGTTGCTCGTTCCAATAGTGGGTCCAATTACAATCAATATGCTACCATTTAGC  
CCCGAATGGGATTTTACTATTTTGGAGCCTTATTTGTTGACGTGCTACATTTGGATTTCGG

CAAAC TTTCCAAAG TTTACTACAAGGGCTTTGCCAAGTGGCTCCTTTACTCGATATCCAGCG  
 GTTTATTAGAGTCTATTCCCATTCTGGGTGGGTTGTTTCATTGGAACAAACGCAGTAGGTGCT  
 TCGCTTTGGATAGTTAAAGAGATAAAAGACCGGGACCAGCCAGCCGTACCTCCTTCCCCCTCC  
 TGC GGAACCAGAAGAGCCTACTGTAGGATCCTATGCACCTCCAATCCAACAATCTATAGCTC  
 ACATTAATCCGCCATGA

>YJL118W 1.85 Hot

ATGGCTTCATGCTTTTCAGTTTCATTATTGGCACGAGTAGCAGTCGTTGAGCCCATCAGAGT  
 GCAACTTTGGTTAAATGTGCTAAATTGTATGATTGAATCATCCATGCACCAATGTCTCCAC  
 GGGATCGCCACTTTTTTTCTTCATCAGCCCCATTTTGTGATCCGACGTTCTGTATCAACT  
 GTATACAGATTTCGTTGCTTCTCGCACCACACAGTTTTTACGTGCGGCCAAGACCGTTGTCAA  
 GTGGTTCATTATTGTGACCCACTGATAAAATCTATTCTAATCAATTATCTCATTGATAGGC  
 TCTGCACTCTTGGGCATGCTGTATTGCGAGTGAAAAAGCGCAAGACCGAGGAGAGACAACCC  
 TGTCTCCCATTTATACAACACACACACGTTAAGAGACGCAAACGGCCTCGTCTGAGGATCGT  
 AGCCATCAAGAGGAAGCGGAGGCGTGAAGACCACATCGCATCGAGCGTCCACTCTCAAATA  
 TGTACCCAATAATGGAAATCCAGATGGTGGCTGTTCCACTTGCTCTTCCAGTCCAACTGCA  
 CTGGTGCATTATCAGCAGCAGCAACAGCAGCTCCC GCAACATCATCCCTGGTACGACCTCTC  
 GCTTCTGAAGAAGCCCTCTCGACCTGCTGTTGTAGTTGA

>YDR297W 1.72 Hot

ATGAACGTAACATCGAATGCAACTGCAGCCGGTTCCTTTCCACTAGCATTGGTCTCAAGAC  
 CTCATTTGGGTTTATGCACTATGCCAAGGCCCTGCCATTAATTTACGCCCAAGGAATCCT  
 TGCTGCCGGAATGAGTGATGGTGTGCTGGCCTTGGTTGCGCCGGTTGTTGCCTACTGGGCG  
 TTGTCTGGTATATTCCATGTAATAGACACTTTCCATCTGGCTGAGAAGTACAGAATTCATCC  
 GAGCGAAGAGGTTGCCAAGAGGAACAAGGCGTGCAGAATGCATGTTTTCTTGAAGTGATTC  
 TACAACATATCATAACAGACCATTGTTGGCCTTATCTTTATGCACTTCGAGCCGATCTACATG  
 ACTGGGTTTTGAAGAAAATGCCATGTGGAAGCTTCGTGCAGACCTTCCTCGGATTATTCCAGA  
 TGCCGCTATTTATTACGGCTATATGTACGGAATGTCCGCTTTGAAGATCTTTCAGGCTTTT  
 TATTCGTTGATACATGGCAATACTTTTTGCATAGATTGATGCATATGAATAAGACCTTATAC  
 AAATGGTTCCACTCTGTTTCATCATGAACATACGTGCCATATGCTTACGGTGCTCTTTTCAA  
 CAATCCTGTTGAGGGCTTCTTGTAGATACTTTGGGAACCGGTATTGCCATGACGTTAACTC  
 ATTTGACTCACAGAGAGCAAATCATTCTTTTACCTTTGCCACCATGAAGACTGTGATGAC  
 CACTGTGGGTATGCTTTGCCACTTGACCCATTCCAATGGCTTTTCCCTAATAACGCTGTCTA  
 TCACGATATCCACCACCAGCAATTTGGTATCAAGACGAACTTTGCTCAACCATTTTCACTT  
 TCTGGGACAATTTGTTCCAACTAACTTTAAAGGGTTTGAAGAATATCAAAGAAGCAAAGA  
 CGTGTACCATCGACAAGTACAAAGAGTTTTTGC AAGAGAGAGAATTGGAAAAGAAGGAGAA  
 ACTCAAAAAC TCAAAGCTATGAATGCTGCTGAAAATGAAGTAAAGAAAGAGAAATAA

>YOL058W 1.73 Hot

ATGCTAAGGGAAAAGTTTGTGTTGGCTTATTCTGGTGGTTTAGATACCTCCGTCATTTTGGC  
 TTGGCTACTAGACCAAGGCTACGAAGTTGTAGCTTTCATGGCTAATGTAGGGCAAGAAGAAG  
 ATTTTCGATGCCGCAAGGAAAAGGCCTTGAAGATCGGTGCCGCAAGTTCGTTTGTGTGGAT  
 TGTCGTGAAGATTTTGTCAAGGATATTCTATTCCAGCTGTACAGGTCAACGCTGTGTACGA  
 AGACGTTTATCTGTTGGGTACCTCTTTGGCAAGACCTGTTATTGCCAAAGCCCAAATGACG  
 TCGCTAAACAGGAGGGCTGTTTCGCGGTCTCTCATGGTTGTACCGGTAAAGGTAATGATCAA  
 ATCAGATTCGAATTGTCAATTTACGCTCTGAAGCCAGACGTTAAGTGTATTACACCATGGAG  
 AATGCCTGAATTTTTCGAAAGATTTGCTGGCAGAAAGGATTTGTTAGACTATGCTGCACAAA  
 AGGGTATTTCCCGTCGCCC AAACCAAGGCCAAGCCATGGTCTACTGACGAAAACCAAGCCAC  
 ATTTCTTACGAGGCAGGTATCTTGGAAAGACCAGATAACCACCCACCAAAGGACATGTGGAA  
 ATTGATCGTCGATCCAATGGATGCTCCGGACCAACCACAAGATTTGACCATTGACTTTGAAC  
 GTGGTCTTCCAGTCAAGTTGACCTACACCGACAACAAGACTTCCAAGGAAGTTTCCGTTACC  
 AAGCCTTTGGATGTTTTCTTGGCCGCATCCA ACTTAGCAAGGGCCAACGGTGTGGTAGAAT  
 CGATATTGTAGAAGATCGTTACATTA ACTTGAATCCAGAGGTTGTTACGAACAGGCTCCAT  
 TGACTGTTTTGAGAAAAGCTCATGTTGATTTGGAAGGTTGACTTTAGACAAAGAAGTCCGT  
 CAATTGAGAGACTCATTTCGTACACCAA ACTACTCCAGATTGATATATAACGGTTTCCCTACT  
 TCACCAGAGTGTGAGTACATCAGATCTATGATCCAACCATCCCAAAATAGCGTTAACGGTA  
 CTGTCAGGGTTAGACTGTATAAGGGTAACTCATCATTCTGGGCAGATCTACAAAGACTGAA

AAGTTGTACGATCCGACAGAATCCTCTATGGATGAGTTGACCGGTTTCTTACCTACCGATAC  
 CACCGGTTTCATTGCCATCCAGGCCATTAGAATTAATAAATACGGTGAATCCAAAAAACCA  
 AAGGTGAAGAGTTGACTTTGTAA

>YEL044W 1.96 Hot

ATGAGCGGTAGTAGGGGCAATAGCAGCAATAGTAGCGTCAGTAATAATAGTAATAATAACAA  
 TAATAATGACGGGGGCGACGAGAGATTGCTGTTTCTAAGAAGCGTGGGCGAACGCAATGAAA  
 TTGGCTTTCCCTCTAGATTCAAGTCGGCGCATTACAAGAAACCGACAAGAAGACACAAATCA  
 GCGAGGCAGTTGATCTCGGACGAAAACAAGCGGATCAACGCCTTGTTGACCAAGGCTAACAA  
 AGCTGCAGAGAGTTCTACTGCTGCTAGGCGACTTGTGCCCAAAGCGACGTACTTTAGCGTGG  
 AAGCGCCACCGTCTATCAGGCCTGCCAAGAAGTACTGCGATGTTACTGGGTTGAAGGGCTTC  
 TACAAGTCGCCTACGAACAACATTCGGTATCACAACGCAGAAATCTATCAGTTAATCGTAAA  
 GCCGATGGCCCCGGCGTCGATCAGGAGTACTTAAATTTGAGAGGGGCCAACTTCGTTCTAA  
 AATAG

>YFR017C 1.56 Hot

ATGACAGATCCCCACTTGAACACGCCCAAGTGAGCACGTCACCCACATTTGAAAGATCACA  
 GGACTTCCTCAACATCGACGAACCGCCCTGTGCACAGGAAACACCTAGTGTTTCTACATTC  
 ACCTCCCGGTCCAAGCGCTCCCGCTCAAAGCGTAGACAAGCCAGTCCCCATGATTAGACGG  
 CGGTCTACCAATTATATGGACGCACTAAATTCAGGGAACAAGCCCGGGAACGCGAAAAGCAG  
 TATCGGGGAGCACGCCCCGGGAGCCGAACGTAGGAGTAGCGGACCCATGGATTTCCAGAATA  
 CTATCCACAATATGCAATACAGGACCACTAACGACTCTGACCTGAGCCACGCTGGCGTGGAT  
 ATGGGTGACTCCATCTCCCATACACCGATCTGTTCTCGTGCTGGCAACAGACCCATTTTCAA  
 AAACCTCGTACCTTGACAACAACAGCAATGGTAACAGCGCAAGAGTCCCACACGGCTCTCCTC  
 CACAGTTGGGCACGCGTAGAAAAGTCGTCTTTTAAAGTACGAGGACTTTAAGAAGGACATCTAT  
 AACCAGCTTCACATGTTTGGAGAGAAGTAA

>YER115C 1.53 Hot

ATGGCTGTTTCTAATATATGGCAATCGTACTCTTCCTCCAATTTACATTTGGATTTATCCTCT  
 GTATACCAATAACTGTTTACAAAATGTAAAGTCATCATTACAGCAGAAATATTATTGAAAA  
 GAAGATGTAATGATATTCAAGATATACTTAATGACAGGATGATTGAATTGTTGCTACAGGGC  
 GCGTGTGACCCAAATAAGCAGCAGAATTACCTTCAGGGGATGAGTCCAAGTAGGAAGAAGAA  
 AACCCACGTTAAGAAATTTTTGAAAAAGCAAAAAAATCAAGGAAACCAATCACTCTGGAGC  
 ATGTTGCTTGTGTCAGGACCCGTGACTCTACGTTTTCGAAATTTTGCAGGAATCAGAGATTTG  
 AGAGGTACCAGGTGCCCGCTCCACGGCATAAAACATGGTGTCCATCCAAAACCCGGGGAGAG  
 GTGTGCATGTCAGCAAGCTACCCCTCTTTCCAAGTCCACTAGCTCGGTTTAGTTGTGACCAGT  
 CTGCTGTACTTGGTTGCGCTGCCCTCCTCCACACGGGTCTATGACAGTATAGCCGATGAGTTT  
 TCATCCCTATATTTTTAA

>YFL066C 2.15 Hot

ATGGCAGACACACCCTCTGTGGCAGTACAGGCCCCACCGGGCTATGGTAAGACGGAGTTATT  
 TCATCTCCCTTGATAGCACTGGCGTCTAAGGGCGACGTGAAATATGTGTCGTTTCTGTTTG  
 TACCGTACACAGTGTTGCTTGTCTAATTGCATGATCAGGTGGGCGACGCGGTTGCTTGAAT  
 GTGGCCCCTGTAAGAACTTTATTGAAGAAGGTTACGATGGCGTTACTGATTTATACGTGGG  
 GATCTACGATGATCTTGCTAGCACTAATTTACAGACAGGATAGCTGCGTGGGAGAATATTG  
 TTGAGTGCACCTTTAGGACCAACAACGTAATAATTTGGGTTACCTCATTGTAGATGAGTTTCAC  
 AACTTTGAAACGGAGGTCTACCGGCAGTCGCAATTTGGGGGCATAACTAACCTTGATTTTGA  
 CGCTTTTGAGAAAGCAATCTTTTGGAGCGGCACAGCCCTGAGGCTGTAGCTGATGCTGCGT  
 TGCAGCGTATTGGGCTTACGGGACTGGCCAAGAAGTGCATGGACATCAACGAGCTCAAACGG  
 TCGGAAGATCTCAGCAGAGGTCTATCCAGCTATCCAACACGGATGTTTAATCTAATCAAGGA  
 GAAATCCGAGGTGCCTTTAGGGCATGTTCAATAAATTTGGAAGAAAGTGGAATCACAGCCCC  
 AAGAAGCACTGAAGCTTCTTTAGCCCTCTTTGAAATTGAACCAGAGTCGAAGGCCATTGTA  
 GTTGAAGCACAACCAACGAAGTGAAGAATTGGCCTGCTCTTGGAGAAAGTATTTTAGGGT  
 GGTATGGATACACGGGAAGCTGGGTGCTGCAGAAAAGGTGTCTCGCACAAAGGAGTTTGTCA  
 CTGACGGTAGCATGCAAGTTCTCATCGGAACGAAATTAGTGACTGAAGGAATTGACATTAAG  
 CAATTGATGATGGTGATCATGCTTGATAATAGACTTAATATTATTGAGCTCATTCAAGGTGT  
 AGGGAGACTAAGAGATGGGGGCTCTGTTATCTATTATCTAGAAAAACAGTTGGGCGGCAA

GGAATCGTAAGGGTGAATTACCACCAATTAAGGAAGGCTGTATAACCGAACAGGTACGCGAG  
 TTCTATGGACTTGAATCAAAGAAAGGAAAAAGGGCCAGCATGTTGGATGCTGTGTCTGCTG  
 A

>YFR036W 1.75 Hot

ATGATCAGAAGGGCCCTACCACCTTGCAGCTCAGTCACGACGACGTAACCTCTCTGATCGA  
 TGACCTGAACGAGCAGAACTCAAGCAGCAGCTGAATATCGAGAAGACAAAATACTTCCAAG  
 GAAAAAATGGCGGATCGCTGCACTCCAATACAGACTTTCAGGACACATCGCAGAATATCGAA  
 GACAACAATAACGATAACGATAACGATATCGATGAAGATGACGACATGTCATCTTACAACGA  
 CAAAGCAGCCTCGGTAGCGCACACCAGAGTCTCAATTCTTGCATCTGTCCACCGACAGCA  
 ATACCGCCACGAGACGTCCAATGCAAACGACAACCACAACCCCTTCTACATCCGCGAGGAA  
 TAA

>YHR217C 1.66 Hot

ATGTCCTACGGCCTTGTCTAACACCATCCAGCATGCAATACAGTGACATATATATACACAC  
 ACCACACCCACACCCACACCCACACCCACACACACCCACACACACACACACCCACACACACCCA  
 CACCCACACCCACACCCACACCCACACACACCCACACCCACACACACCCACACCCACACCA  
 CACCACACCCACACACACCCACACCCACCTATCTAACCTGTCTCTTAACCTACCCTCACATTA  
 CCTTACCTCCCCACTCGTTACCTGCCCCACTCAACCATACCACTCCCAACCACCATCCATC  
 TCTCTACTTACTACTACCATCCACCGCCATCATAACCGTTACCCTCCAATTACCCATATCC  
 AACTCCACTACCATTACCCTGCTATTACCCTACCATCCACCATGTCCTACTCACTGTACTGT  
 TGTCTACCCTCCATATTGAAACGTTAA

>YBR128C 1.55 Hot

ATGCATTGCCCAATTTGCCACCATAGAGCGCATGTAGTGTACTGTGCACATTGTATCAATAC  
 GAGCCCAAGTCTGCTACTGAAGCTAAACTAGATTTAATTTTATTAAAGGATGAGAATAAAG  
 AACTTAACGGGAAAGTGAACAAATATTAACGAGGCCATGAACTATGACCAGTTAGATATC  
 AAGAGGATGGAGAAAAAGAAAGATCCCTGATGAATAGTCTCATGAAGTTAGATGTTTTACG  
 AATGAAAAAGAATAATAACCTGATTAGGCACAGGATAGAACAGCTAAATGAGCGGATTTATA  
 GTAAAAGGAATCACATCAGCGAATTGAAAGTAGAAATTGACAATTATAAATGTTATAAGGTG  
 GGTACTGGTACGGACAAATTAAGAGAGCAAGTGGAAATTAGTGTGCAAAAAATAAGCTGGC  
 ACAAGTATCGAAGATTTGTGAATCGGCTAGAGATTACAAGCTCAATCTACTAAATAAATTGGT  
 TTGTGATCCAGAAGCTGCAAGATAATTTCCAAATACCTTTCGCTATAGCTTTTTAGCCACTA  
 ATATCTTTGAAAACTTCCGTATTTTACCTCTTGCTATAACAAACGATTCCATCAACATCAT  
 GTGGAAGTATATTAGCTTCTTCTCAGACATCTTATGATTAACTTCCCTACACAAATAAAA  
 TCTGTGAACAACCCATGTTTGGATTTTCCGATAGCATAACAGACAGTAGTACAAAGGTTGATC  
 AAGCTTATCATAAATATTTTACAGATATGTAGACATTTGAAACTCGTACCTTCAACACCCAT  
 GGATATCCCATGGCTACTGGACCAGTACGATGTGGATGGGCTGTTCTATAAATATGGTGAAC  
 GGAACAAGATGAAGTGTAGGTCCGTCTCGCTATATTGGACTTTTGGGATGTTGTACTCGATG  
 GTTTTGGATAACATGAATAATCCACAAGAGGACATCCTGCAAGGCGGACCGCACCACCTCC  
 AACAGTCACAGGACCTCATGACCGATGGTACGTGGTAGGCTAG

>YPL111W 2.13 Hot

ATGGAACAGGACCTCATTACAACACTACTACAAAAATCGCGAATTGTCCATCGTTCTGGCTCC  
 ATTCAGCGGCGGTCAGGGTAAGCTTGGTGTGCGAGAAGGGCCCTAAATACATGCTTAAGCATG  
 GTCTGCAAACAAGCATAGAGGATTTGGGCTGGTCTACGGAATTAGAGCCCTCAATGGACGAG  
 GCCCAATTTGTGGGAAAGTTGAAAATGGAGAAGGACTCCACAACCTGGGGGTTCTCTGTTAT  
 GATAGACGGTGTCAAGGCTAAAAGAGCAGATTTGGTGGTGAAGCCACCAAGTTGGTGTACA  
 ACTCCGTGTGCAAGTGGTCCAGGCGAACAGATTTCCCTTGACCTTGGGTGGTGTATCA  
 ATAGCCATTGGTACTGTATCCGCGGTTTTGGACAAATACCCCGATGCTGGTCTTTTATGGAT  
 AGACGCCACGCTGATATAAACACCATAGAAAGCACCCCTCTGGAAACTTGCACGGCTGTC  
 CCGTGTCAATCCTAATGGGTTGAACAAGGATGTCCACATTTGTCGAGTCGCTCAAAATGG  
 GTTCCAGGCAACTTGAGCCAAAAAGATCGCGTATATTGGGTTGAGAGATGTTGATGCCGG  
 AGAAAAGAAAATCTTGAAGATCTGGGTATCGCCGCTTTTCCATGTACCACGTTGACAAAT  
 ACGGCATCAACGCTGTCAATTGAAATGGCAATGAAAGCCGTGCACCCAGAAACAAACGGTGAA  
 GGTCCATTATGTGCTCCTATGACGTCGATGGTGTAGACCCATTATACATTCCTGCTACAGG  
 TACTCCAGTGAGAGGTGGGTTGACCTTGAGAGAAGGTCTTTTCTTGGTGGAAAGATTGGCCG

AATCCGGTAATTTAATTGCGCTAGACGTTGTTGAATGTAACCCTGATCTGGCTATTCATGAT  
 ATCCATGTTTTCAAACACCATCTCTGCAGGTTGCGCCATTGCAAGGTGTGCATTGGGTGAAAC  
 CTTATTGTAG

>YPL187W 1.61 Hot

ATGAGATTTTCTTCAATTTTTACTGCAGTTTTATTTCGCAGCATCCTCCGCATTAGCTGCTCC  
 AGTCAACACTACAACAGAAGATGAAACGGCACAAATTCCGGCTGAAGCTGTCATCGGTTACT  
 TAGATTTAGAAGGGGATTTTCGATGTTGCTGTTTTGCCATTTTCCAACAGCACAAATAACGGG  
 TTATTGTTTTATAAATACTACTATTGCCAGCATGCTGCTAAAGAAGAAGGGGTATCTTTGGA  
 TAAAAGAGAGGCTGAAGCTTGGCATTGGTTGCAACTAAAACCTGGCCAACCAATGTACAAGA  
 GAGAAGCCGAAGCTGAAGCTTGGCATTGGCTGCAACTAAAGCCTGGCCAACCAATGTACAAA  
 AGAGAAGCCGACGCTGAAGCTTGGCATTGGCTGCAACTAAAGCCTGGCCAACCAATGTACAA  
 AAGAGAAGCCGACGCTGAAGCTTGGCATTGGTTGCAGTTAAAACCCGGCCAACCAATGTACT  
 AA

>YIL153W 2.22 Hot

ATGTCCTCTGGATCGTGTAGATTGGCCGCACGCCACCTTCTCTACGCCGGTGAAGCGTATCTT  
 CGATACGCAGACAACGCTGGACTTCCAATCGTCACTAGCCATTCACAGAATCAAGTATCATC  
 TTCACAAGTACACTACGTTGATATCGCACTGTTCTGACCCCGACCCGCACGCTACTGCGTCG  
 TCGATCGCCATGGTTAACGGGCTGATGGGAGTGTGGACAAGCTGGCACACCTGATCGACGA  
 GACACCGCCTCTTCCAGGTCTAGAAGGTATGGTAACCTAGCATGCCGCGAGTGGCATCACA  
 AGCTGGATGAACGTTTTGCCTCAGTGGCTGCAGGAAATGCTTCCCTCGGAATACCATGAGGTG  
 GTGCCTGAATTGCAGTATTACCTGGGCAACAGCTTTGGTTTCGTCGACAAGATTGGACTACGG  
 CACGGGCCACGAACTTTTCGTTTCATGGCCACGGTCGCAGCACTGGACATGCTGGGGATGTTTC  
 CGCACATGAGGGGGCAGACGTTTTTCTGCTGTTCAACAAGTACTACACGATCATGAGGAGG  
 CTGATCCTGACGTATACGCTGGAGCCCGCTGGGTACATGGCGTGTGGGGGCTTGATGACCA  
 TTTCCACTTGGTGTACATCTTGGGCTCGTCTCAATGGCAGCTGCTTGATGCGCAAGCACCCCT  
 TGCAACCAAGAGAAATACTGGATAAGTCTCTGGTGC GCGAGTATAAGGACACCAACTTCTAC  
 TGCCAAGGCATAAACTTTTATTAATGAGGTGAAAATGGGGCCCTTTGAAGAGCATTCCCCCAT  
 CCTATACGATATTGCCGTCACCGTTCCACGCTGGTCCAAAGTGTGTAAGGGCTTCTAAAAA  
 TGTATTCTGTAGAGGTTCTGAAGAAGTTCCCCGTGGTGC AACATTTCTGGTTCCGGCACAGGC  
 TTCTTTCCCTGGGTCAACATTTCAAACCGGCACCTGATCTTCCAGTCTTTGAAGAAAAGGAGGA  
 AGAGAGTATAGAACAGGCTAACGCAGGATCGCCGGTCGAGAACAGACTTCAACACGATTCC  
 CAACGTCCACGTCAATGCCTCCCCAGGCGTTCCGCCGTCAGGTAACAATATCAACTATTTA  
 CTAAGCCATCAAACCCAGTCGCACCGGAACCAGACTTCTTTTTCAAGAGATAGACTACGTAG  
 ATAA

>YOL059W 1.96 Hot

ATGCTTGCTGTCAGAAGATTAACAAGATACACATTCCTTAAGCGAACGCATCCGGTGTATA  
 TACTCGTCGTGCATATAAAAATTTTGCCTTCAAGATCTACTTTCCTAAGAAGATCATTATTAC  
 AAACACAACCTGCACCTCAAAGATGACTGCTCATACTAATATCAAACAGCACAAACACTGTCAT  
 GAGGACCATCCTATCAGAAGATCGGACTCTGCCGTGTCAATTGTACATTTGAAACGTGCGCC  
 CTTCAAGGTTACAGTGATTGGTCTGGTAACTGGGGGACCACCATCGCCAAAGTCATTGCGG  
 AAAACACAGAATTGCATTCCCATATCTTCGAGCCAGAGGTGAGAATGTGGGTTTTTGTATGAA  
 AAGATCGGCGACGAAAATCTGACGGATATCATAAATACAAGACACCAGAACGTTAAATATCT  
 ACCCAATATTGACCTGCCCCATAATCTAGTGGCCGATCCTGATCTTTTACACTCCATCAAGG  
 GTGCTGACATCCTTGTTTTTCAACATCCCTCATCAATTTTTACCAAACATAGTCAAACAATTG  
 CAAGGCCACGTGGCCCTCATGTAAGGGCCATCTCGTGTCTAAAAGGGTTCGAGTTGGGCTC  
 CAAGGGTGTGCAATTGCTATCCTCCTATGTTACTGATGAGTTAGGAATCCAATGTGGCGCAC  
 TATCTGGTGC AACTTGGCACCGGAAGTGGCCAAGGAGCATTTGGTCCGAAACCACCGTGGCT  
 TACCAACTACCAAAGGATTATCAAGGTGATGGCAAGGATGTAGATCATAAGATTTTGAAATT  
 GCTGTTCCACAGACCTTACTTCCACGTCAATGTCATCGATGATGTTGCTGGTATATCCATTG  
 CCGGTGCCTTGAAGAAGCTCGTGGCACTTGCATGTGGTTTCGTAGAAGGTATGGGATGGGGT  
 AACAAATGCCTCCGCAGCCATTCAAAGGCTGGGTTTAGGTGAAATTATCAAGTTCGGTGAAT  
 GTTTTTCCAGAAATCCAAAGTCGAGACCTACTATCAAGAATCCGCTGGTGTTCGAGATCTGA  
 TCACCACCTGCTCAGGCGGTAGAAACGTCAAGGTTGCCACATACATGGCCAAGACCGGTAAG  
 TCAGCCTTGAAGCAGAAAAGGAATTGCTTAACGGTCAATCCGCCCAAGGGATAATCACATG

CAGAGAAGTTCACGAGTGGCTACAAACATGTGAGTTGACCCAAGAATTCCATTATTTCGAGG  
 CAGTCTACCAGATAGTCTACAACAACGTCCGCATGGAAGACCTACCGGAGATGATTGAAGAG  
 CTAGACATCGATGACGAATAG

>YFR037C 2.64 Hot

ATGAGCGACACTGAAAAGGATAAGGATGTCCCTATGGTAGACTCGCACGAAGCGACCGAGGA  
 GCCACCCACCACAAGCACCAACACGCCATCTTCCCTCACTTAGCACAGGAACAGGCGAAGG  
 AGGAATCTGCCACATTGGGAGCAGAAGTAGCTCATAAGAAAATCAATTACGAGCAAGAAGCA  
 CAGAAACTGGAGGAGAAGGCCCTTAGGTTCCCTGGCAAAGCAAACCTACCCGGTGATTATTC  
 GTCGTTTGCCTCTTGGTTTTGATATTTGAAAGATCCACGAGATCGAAAAAAGATCCAATCCCG  
 ACTTTTTCAACGATTCATCAAGGTTCAAGACACCAAAGGCATATAAGGACACAAGAAATTTT  
 ATCATCAACACGTACCGTCTTTCGCCGTACGAATATTTGACCATTACCGCTGTGAGAAGAAA  
 TGTGTCATGGATGTTGCCTCGATAGTGAAGATTCACGCGTTCCTGGAAAAATGGGGCTTAA  
 TCAATTATCAGATTGACCCAGGACCAAGCCAGTCTTATTGGGCCAAGTTTTACGGGCCAC  
 TTCCAAGTGGTTCGGACACTCCGCAGGGGTAAAGCCATTTTTACCAGAGAATGTGATCAA  
 GCAAGAAGTGAAGGAGGAGATGGAGCGGAACCACAAGTCAAGAAGGAATTTCCCGTTAATC  
 TCACAATCAAGAAGAACGTTTACGATTCTGCACAAGACTTCAATGCATTACAAGACGAAAGT  
 AGAAACTCCAGGCAGATTACAAAAGTTTACATTTGCCATACATGCGGTAACGAGTCAATCAA  
 TGTGCGCTACCACAATTTGCGTGCACGGGACACCAACCTGTGCTCCCGTTGTTTTCCAAGAGG  
 GTCATTTCCGGTGCCAACCTTTCAATCTTCAGATTTTCATCAGATTAGAAAAACAACGGAACTCG  
 GTTAAAAAAAAGTGGTCAGACCAGGAGATGCTACTATTGCTGGAGGGTATTGAAATGTATGA  
 AGACCAGTGGGAGAAGATTGCTGACCACGTGGGTGGGCACAAGCGTGTAGAAGACTGCATTG  
 AAAAAATTCCTAAGCTTACCAGATCGAGGACAACCTACATCCGAGAAGTTGTTGGTTCAACGCTG  
 AATGGTAAGGGTGGCGACAGCCGCGATGGTAGTGTGTCCGGTTCGAAGTTGATGGAATGCGT  
 GAATGATGCTGTCCAGACGCTACTGCAAGGCGACGACAAAATGGGGTAAGGTCTCTGATAAGT  
 CGAGAGAGATCTCCGAAAAGTACATTGAAGAAAGCCAAGCGATAATCCAAGAGTTAGTCAAG  
 CTGACCATGGAGAAATTAGAGAGCAAGTTTACAAAGCTGTGCGATCTAGAAAACGCAACTGGA  
 GATGAAAAAAGTGAATATGTGAAGGAATCTGAAAAGATGCTGAACGACCGATTATCACTGA  
 GTAACAGATTCTTGACCTGAACAAGTCCGTGGAGGAGTTGAATGTGTGAAGAAACTGGTA  
 CTGATCTCGGAGCAAGTAGACTCGGGCATACTAGTGGAGAAGGACCAGGAGGGCGATGA  
 CGAAGACGGCAATACGGCCACAGGACATGGCGTGAACCGTGTAGGCAAGGAAGCGAGGAAG  
 TAGGCGAAGGCGACTCCATTGCAAAATTCAGCCCCAGGTGTACAAACCGTGGTCAATTGTAA

>YGR160W 1.56 Hot

ATGACACCACCGATGTGTTTCAATTCCTTCTTCAACCATTTCGTCATCAATAGACCACGATAG  
 TCTACCAACGAAAATAGTAGCTGGTTCTTCGTTTTCTTCATTTTTTTGCTTCTTGTGGAAG  
 ACTCTTCGTTCTTCTTCTTCTTCGGCGTCCCTCAGATTTACGTTTTCTTATCGTTAGACTCTTCC  
 TTTTCGCTTTTCGCTATCAGAAGATGAAGATGAGGATGAATCAGAGCTAGAAGATTCTTTTGA  
 TTCTTCTTCTTGTGTTTTCTTCTTTTTCTTCTTCTTCTTCTTCGTCGGAAGAAGAGTCAGAGG  
 AAGAGGAAGAGGAATCCCTTGGATTCTTCTTCTTCTTGGTTTTAGCTTCACTTTCGCTGTCAGAA  
 GACGATGAAGAAGAGGATTCAGAATCAGAGGATGAAGATGAAGATGAAGATTCAGATTCAGA  
 CTCAGACTCAGATTCAGATTCAGATGAAGATGAAGATGAGGATGAAGATTCGGAGGAAGAGG  
 AAGAGACGGCCTTAGCTTTTTCTTCTTTGGCTGTTTTGGAAGCCTTAACTTCTTCTTGTGA  
 CCTTTTACTTTAGTAGTCTTAGCCATCTTATTTTTATCCTGCCTGGGTTGAGTGA

>YAL036C 1.96 Hot

ATGCTACTACAGTTGAAAAAATCAAAGCTATCGAAGATGAAATGGCCCGTACCCAAAAGAA  
 CAAGGCCACATCTTCCATTTGGGTCAACTGAAGGCCAAGCTGGCCAACTGAGAAGAGAAT  
 TGTGACCAGTGCTTCATCCGGCAGCGGTGGTGGTGTGTTGTTGATGTGGCTAGA  
 ACTGGTGTGGCCAGTGTGGGGTTTGTCCGGTTCCTCGGTGGGGAAATCTACATTACTGTC  
 CAAGTTGACTGGTACTGAGTCTGAAGCAGCTGAGTACGAGTTTACCACCTGGTTACCGTCC  
 CCGGTGTCATTCGTTATAAAGGTGCCAAGATCCAAATGTTGGATTTACCTGGTATTATCGAT  
 GGTGCTAAGGATGGTAGAGGTAGAGGTAAGCAAGTTATTGCCGTGGCAAGAACCTGTAACCT  
 GTTATTTATCATCTTAGATGTGAACAAACCTTGCATCATAAGCAAATCATTGAGAAGGAAC  
 TGGAAGGTGTGGGGATTTCGTCTGAATAAAACTCCGCCAGATATCTTGATCAAAAAAAGAG  
 AAAGGTGGTATTTCCATCACAAACACAGTCCATTGACCCATCTGGGGAATGACGAAATCAG  
 AGCCGTTATGAGCGAGTACAGAATAAATAGCGCTGAGATTGCCTTCAGGTGTGATGCCACTG

TGGATGATTTGATTGATGTTTTGGAAGCTTCGTCAAGAAGATACATGCCTGCCATCTATGTG  
 TTAACAAGATTGATTCTCTGTCAATAGAGGAATTGGAATTACTTTACCGAATTCCTAATGC  
 CGTGCCTATTTTCGTCTGGTCAAGATTGGAACCTTGGACGAGCTGTTGCAAGTCATGTGGGATA  
 GACTAAATCTAGTCCGTATTTACTACTAAACCAAAGGGCCAAATACCAGATTTTACCGACCCT  
 GTGGTGCTAAGATCAGACCGTTGCAGTGTCAAGGATTTTTGTAACCAAATTCATAAATCTTT  
 AGTGGACGACTTTAGAAATGCTCTGGTTTACGGTAGCAGTGTCAAACATCAACCTCAATACG  
 TGGGTTGAGTCACATTTTGGAAAGACGAAGATGTTGTTACCATCTTGAAAAAGTGA

>YOL093W 1.55 Hot

ATGTCCAATGATGAGATAAACCAGAACGAGGAAAAGGTGAAAAGAACACCACCTTTACCGCC  
 TGTGCCAGAAGGCATGTCTAAAAAGCAATGGAAAAAATGTGTAAAAGACAGAGATGGGAGG  
 AGAATAAAGCCAAATACAATGCGGAACGCCGTGTAAAGAAGAAGAGACTTCGCCATGAAAGA  
 AGTGCGAAGATTCAAGAATACATTGACAGGGGAGAAGAGGTCCCGCAGGAATTGATTAGAGA  
 GCCTCGTATCAATGTGAATCAGACTGATTCTGGGATAGAGATCATACTTGACTGTTCTTTTG  
 ATGAGTTAATGAACGACAAGGAAATAGTAAGCTTGTCTAACCAGGTCACCAGGGCATACTCC  
 GCGAATAGAAGGGCGAACCATTTTGCAGAAAATAAGGTGGCCCCATTCGACAAAAGACTAAA  
 GCAAAGTTTTGAACTACTCTGAAAAATACCAATTATGAAAACCTGGAACCATTTTTAAATTC  
 TACCAGACGACAAAATCATGTTTGGAGATGAGCATATAAGTAAGGACAAAATAGTGTATTTA  
 ACGGCCGATACAGAGGAAAAGCTGGAGAAGCTGGAACCCGGGATGCGATACATTGTTGGCGG  
 CATTGTAGACAAGAATCGTTATAAAGAATTGTGTCTGAAGAAGGCCAAAAGATGGGCATTC  
 CTACGCGAAGATTGCCCATTTGACGAGTACATCAATCTCGAAGGCAGAAGAGTGTGACGACA  
 ACGCACGTCGTGCAACTCATGCTGAAATACTTTGATGACCATAACTGGAAAAATGCCTTTGA  
 AAGCGTTTTTACCACCCAGAAAAGCTGGATGCGGAAGCAAAATCCGCAAGCTCTTCGCCAGCTC  
 CAAAGGACACATAG

>YDR073W 2.14 Hot

ATGAGCAGTGAAATTGCCTACTCGAATACGAACACCAACACTGAAAACGAGAACC GCAATAC  
 TGGCGCTGGCGTAGATGTAAATACAAATGCAAATGCAAATGCAAATGCAACTGCAAATGCAA  
 CTGCAAATGCAACTGCAAATGCAACTGCAGAGCTGAACCTCCCCACGGTCGATGAGCAAAGA  
 CAGTATAAGGTACAACCTGCTATTGCATATCAACAGCATATTACTTGCTAGAGTTATTCAGAT  
 GAATAATAGTTTTACAAAACAATCTACAGAACAATATAAATAATAGCAATAACAATAACATCA  
 TCAGGATACAGCAACTTATATCTCAGTTCCTTAAAAGGGTTCATGCCAATCTTCAATGCATA  
 TCTCAGATAAACCAAGGAGTGCCCTCAGCGAAACCACTGATCCTCACGCCCTCTCAGCTAGC  
 CAACCAGCAGCAACCTCCACAGGATATTCTTTCTAAACTCTATCTTCTCTTGGCAAGAGTGT  
 TCGAGATATGGTAG

>YGL148W 1.56 Hot

ATGTCAACGTTTTGGGAAACTGTTCCGCGTCACCACATATGGTGAATCGCATTGTAAGTCTGT  
 CGGTTGCATTGTGCGACGGTGTTCCTCCAGGAATGTCATTAACCGAAGCTGACATTCAGCCAC  
 AATTGACCAGAAGAAGACCGGGTCAATCTAAGCTATCGACCCCTAGAGACGAAAAGGATAGA  
 GTGGAATCCAGTCCGGTACCGAGTTCGGCAAGACTCTAGGTACACCCATCGCCATGATGAT  
 CAAAACGAGGACCAAAGACCTCACGACTACTCCGACATGGACAAGTTCCTTAGACCTTCCC  
 ATGCGGACTTCACGTACTCGGAAAAGTACGGTATCAAGGCCCTCCTGTTGGTGGCAGAGCT  
 TCTGCTAGAGAAACGATTGGCCGTGTCGCTTCAGGTGCCATTGCTGAGAAGTTCCTTAGCTCA  
 GAACTCTAATGTGCGAGATCGTAGCCTTTGTGACACAAATCGGGGAAATCAAGATGAACAGAG  
 ACTCTTTCGATCCTGAATTTTACGCATCTGTTGAACACCATCACCAGGGAAAAGTGGACTCA  
 ATGGGTCCATCAGATGTCCAGACGCCTCCGTTGCTGGTTTGTGTTGATGGTCAAGGAAATCGAAA  
 GTACAGAGGCAACAAGGACTCTATCGGTGGTGTGCTCACTTGTGTGCTGAGAACTTGCCTA  
 CCGGTCTCGGTGAGCCATGCTTTGACAAGTTGGAAGCCATGTTGGCTCATGCTATGTTGTCC  
 ATTCCAGCATCCAAGGGTTTTGCAAATTTGGCTCAGGTTTTTCAAGGTGTCTCTGTTCCAGGGTC  
 CAAGCACAATGACCATTTTACTTTGAAAAAGAAACAAACAGATTAAGAACAAGACCAACA  
 ATTCAGGTGGTGTACAAGGTGGTATCTCTAATGGTGTGAAACATCTATTTCTCTGTCCATTC  
 AAGTCAGTGGCCACTATCTCTCAAGAACAAAAACCGCCACTTACGATGGTGAAGAAGGTAT  
 CTTAGCCGCTAAGGGTAGACATGACCCTGCTGTCACTCCAAGAGCTATTCCTATTGTGGAAG  
 CCATGACCCTCTGGTGTGGCTGACGCGCTTTTGATCCAAAAGGCAAGAGATTTCTCCAGA  
 TCCGTGGTTTCATTAA

>YDL125C 1.51 Hot

ATGGAGCCATTGATATCGGCACCGTACCTAACCAACAACAAAAATGTCTGCTCCTGCTACGCT  
 TGATGCTGCCTGTATTTTTTTGCAAGATTATTTAAAGCGAAATTCATCCTTCAAATTTGATTG  
 AAACAAAGTACTCGTATGCTTTCTTGGACATCCAACCTACTGCTGAAGGTCATGCTTTAATC  
 ATTCCTAAGTACCATGGTGCAGAGTTGCATGACATCCCGGACGAATTCCTTACCGATGCTAT  
 GCCGATTGCCAAGAGACTGGCCAAGGCAATGAAGTTGGACACTTATAATGTGTTGCAGAATA  
 ATGGTAAAATTTGCGCATCAAGAAGTCGACCACGTCCACTTCCATTTGATTCCTAAGAGAGAT  
 GAGAAAAGTGGTTTGTATTGTAGGGTGGCCAGCCCAAGAAACGGACTTCGATAAGTTGGGCAA  
 GCTACACAAGGAATTTGCTTGCCAAACCTAGAAGGCTCCGATTAG

>YLR349W 1.61 Hot

ATGGCACCCTGAACATGGAGCAAGGTAAAAGATACGCCATGTTAGTCAATTGCTCGCGTGG  
 GATCACATTCTCTTTCAACAAGTCGTATGCACCGAATCTCACCGTCGTGTATGTACATTGCC  
 TCAACACAGCAGCGCTCAGGCCGGAATATAACCCACACACCTTCATTCGCCAAGATACTC  
 TCCAACATCCTGAAGAGTGTGGGCTTGGGCATAGGAGCCGCCTGCAGTCTGACTTTGGCCAA  
 GTCAAGAGGATGTGTACCATGGTAGCAAAGATACCCGCTGCACCTCCGTACCACCATGGAT  
 ACTTGATATTCTTACCGGCAGACTCTTTTTCGCTTGGTTGACATGCCGTCCAGCTGTTGCGTT  
 ATCTTTTTCGACACTTTTCAGAGCAAGAGAAAACGAACCTCTACACATAAATATGCATACGATTA  
 TGTATATCCATATATATATATACACTACAAGCCGACCGCCCGACCGTTTCTGCCCCAACA  
 TTGCAGCGTAA

>YER149C 1.69 Hot

ATGCATAAATTTGATCTAGAGCTCTCGAGAAGAGCGAACCCTTTGCTTTTTTAGTGCAAGAACG  
 ATACGAAGAGTATCCATTGAAATACGATGAATTGAAACAGTACCTTCTCTCCCAAAATCCGT  
 CACATCCGCATCACAATAGTAGACCATAACACTTCCATTGACTATTTTTGACTATCTTCTGTAT  
 AGAAGTAAAAATGACGAGTCAGAAATAGACCTTGACAAAAAGCTAGTGTCTGAGTTCCGCCCT  
 ATACTACGTTCAAAAAGAGCACTTGAACCTCTGATGATCTAAATCCCACACTCAATGAGTTGC  
 TGAAGCTGCAGCCGAAGTCTGCGGATTGGTATGAAATGATGCTGAGGATCCTTGAATCCATT  
 AACACTACAGGGATAGACCAGCTTACGAAGGAAAACAACAACAGTTTCCCAAATTTCTAAAAG  
 AGCGAGGTCTTCCACTAATATGGGTGGCACAGATAAATTTAACAAGGGTGCTTACCATACTG  
 ACAAAGCTGATGACGATAAAAAATGAAATACTTCAAGAATTAACGTCCTTCTTGATGTCAAAC  
 TCCATTCAGAAAGGCATTGATATCAAGCCAATACCATTAGATGACCCTGTGAAGTTCTTGAA  
 AAATGGGATAAATTTCTATCTTGGATACCTGCGTCAGTCTAGAAAAAATACGTCATCACCAC  
 CTATTTTCGCCTAACGCCGCTGCAATTTCAAGAGGAAGACTCCTCTAAAAAATTAGAAGAACTA  
 GAAACGGCATTTAGTGATTTGCAACTGGCACACAATTTCTTACTAAGCAATTCGAGAATGA  
 CCGTGCCGAATATGTACAAGATATCGAGAAGCTAACCGGACTAACAGAGAATTACAAGATA  
 AGTTATTAACAACCACTCGAATTTGAGTAAAACCTGAAAAGAAATTACACGAATTTGGAGCAG  
 GAAAATAAAGAACTTGA AAAAGCCAACAACAAGCTGAATTC AAGCAGACATAATTTTCGGCAT  
 GTCATCACCAGCGAGTTTCGCCGTTGACTTGGGATCCAAGTTCACCTTCTCTGTAGGAAGCC  
 CCACAAGCGGTTCTGGATCACGTTCACTTTCAATAATGACAAGTGAAGTTAAAAAAGTGCTT  
 ACGAGTACACAAGAAAGTATGAAAAAGAATTTGTCGGATGAGCGTGAACATAGATTCAAGCT  
 GGAAAGGGAGCTTGCTTTGCTGAAAAATGCAGAGGCCAAACACCTCGCTGGCGCTTAATAGAG  
 ACGATCCACCAGATATGCTATGA

>YJR074W 2.7 Hot

ATGAAGATTGAAAAGGCTTCTCATATTTACAACCGGTGCAACTTTCCACATGCACTCTCAT  
 TGACACCTACCCTGGTCATCAAGGAAGCATGAACAACAAGGAAGTCGAATTATACGGCGGCG  
 CCATCACTACTGTCGTCCCACCTGGGTTTATAGACGCTTCTACTCTAAGAGAAGTCCCCGAT  
 ACACAGGAGGTGTACGTCAATTTCCCGTCGCGATGAAGAAGAATTCGAAGATGGACTAGCCAC  
 CAATGAAAGCATTATCGTGGATCTCTTGGAGACGGTCGACAAGAGCGATCTGAAGGAGGCTT  
 GGCAGTTCCACGTGGAAGACCTGACGGAGTTGAACGGGACCACCAAATGGGAAGCTTTACAA  
 GAAGACACTGTTTCAGCAAGGAACCAAGTTCACCGGACTCGTTATGGAAGTAGCAAATAAGTG  
 GGGAAAACCAGATCTGGCACAGACCGTTGTCTATCGGCGTAGCGTTGATCAGATTAACCCAGT  
 TTGACACGGATGTGGTCATCTCCATTAATGTACCTTTGACAAAGGAGGAGGCGTCGCAAGCA  
 AGCAACAAGAGTTGCCTGCAAGATGTATGCTGTTTACCAATTTGTTGCAAGAAATGGTACG  
 GAAGTTTACGTTGTGGACACGTCGCTGTTTGCTTAA



>YBL055C 1.61 Hot

ATGTGGGGCATCTTATTGAAATCCTCGAACAAAAGTTGTTCTAGGCTCTGGAAACCAATTTT  
 GACACAATATTATAGCATGACATCAACTGCCACGGATTCTCCGCTGAAATACTATGATATTG  
 GATTGAATCTGACAGATCCTATGTTTTACGGTATTTACAATGGTAAGCAGTACCATCCAGCA  
 GATTATGTAATAATTATTAGAGCGTGCTGCTCAGAGGCACGTGAAAAATGCCCTTGTTACAGG  
 ATCATCCATAGCGGAGTCTCAAAGTGCCATTGAGTTGGTAAGCAGCGTCAAAGATCTTAGCC  
 CGTTAAAGCTGTATCACACAATAGGTGTTACCCATGTTGCGTTAACGAGTTTGCGGATGCT  
 AGTCAAGGGGACAAGGCTAGCGCTTCTATTGATAACCCTTCCATGGATGAAGCATATAATGA  
 GTCTCTATATGCTAAAGTTATTAGTAATCCATCTTTTGCACAGGGTAAACTGAAAGAGCTTT  
 ATGATTTGATGAATCAGCAAGCAAACCTCATGATACAAGTTTCAGGTCAATTGGTGAGATC  
 GGGTTGGACTACGACAGATTTCACTATAGTTCTAAAGAGATGCAAAGGTTTTTTTTGAAGA  
 GCAACTGAAAATAAGTTGTTTGAACGATAAACTCAGCAGCTATCCATTGTTTCTGCATATGA  
 GAAGCGCATGTGACGATTTTGTTCAAATATTGGAAAGATTTATTGCCGGGTTCACTGATGAG  
 AGGGATACCTTTCAGCTACAAAAGTTAGGTGCATCGTCGCTAGCGGGTTTTACAAATTTCA  
 TCCAGATAGAAAAC TAGTGGTCCATTCACTGCTGCTGCGATAGATTTGCAGAAATTAC  
 TGAAC TTATCACCCAACATCTTCATAGGAGTAAACGGTTGCTCGTTGAGAACCAGGAAAAT  
 CTAGCTGTTGTAAGCAAATACCAACAGAAAGGTTGTTATTAGAGACAGATGCTCCGTGGTG  
 TGAGATTAAGAAGCATGCATCTTTCAGTACTTAGCCAAATACCAGGAGGTTAGGGATT  
 TCGAATACCCTGCATTCAAGTCCGTTAAGAAAAATAAGCTCGCTGACAAGTTGAATGCAGAA  
 GAAC TTTACATGGTCAAGGGCCGTAATGAGCCTTGTAATATGGAACAAGTAGCAATTGTCGT  
 ATCGGAAGTCAAGGACGTGGATCTGGCTACTTTGATAGATACCACGTGGAAGACGACCTGTA  
 AGATATTTGGAGAGTAA

>YJL116C 1.54 Hot

ATGAAAATTTCCGCAGCTTTAATATTGTCTTCCCTTTCTTCTGTGCGCATTTTCTGCCCTGC  
 ACCTGCTCCAGCGGACAGTCAACATGAAGATCATCACAAAGATGAAAAACCAGCGGTTGTCA  
 CTGTCACTCAATACATAGATTCCAATGCCGCTACTAGTACTGTAGAATCTGCTGCTACTACC  
 ACTACATTGTCTCATCTGAGAAGGATACCTCTGAACAGAGCGTGATGGCGGATTCCAAGA  
 TGGTACTGTCAAATGTTTCGGACTTCCCTTCTGTAAACGGTATAGTTTCCCTGGACTGGCTAG  
 GATTTGGTGGATGGGCTCTGTGCATGGACATGGATGCCAACACTTCGTCCGAATGTAAGGAT  
 GGCTACTACTGTTCTTATGCATGTGAACCTGGAATGTCAAAGACTCAATGGCCTTCTGACCA  
 ACCAAGCGATGGTAAATCTGTTGGTGGTCTTTACTGTAAAAATGGTTACTTGTACCGTACCA  
 AACTGATAACCAGCGATTTATGTTCTACGGATGAAACATCTGCTAAGGCCATTAACAAAAAG  
 TCTGACTCCATTGCTCTATGTAGGACGGATTACCCAGGATCAGAAAACATGGTGATTCCCAC  
 AGTGGTTGATGGTGGAGATTCACAACCAATTTAGTTCGTTGATGAAGACACTTATTATCAAT  
 GGCAGGGTAAAAAGACTTCTGCTCAGTACTATATTAACAACGCCGGTGTATCTGCAGAAGAT  
 GGGTGCATTTGGGGTACTTCTGTTCCGATGTCCGCAACTGGGCTCCACTAGTGTAGGTGC  
 TGGTTCCACTAATGGAGAAACATACTTGTGCTTATTCCAAACCCCAACAGTAACCAAGCTG  
 CCAACTTTAACGTTAAAATAGTTGCATCCGATGGCGCTAACGTTTCAGGGCAGCTGTGCGTAT  
 GAAGATGGCTCTTTCACCGGAGATGGTTCCGATGGTTGCACAGTTTCTGTTTTATCTGGATC  
 TGCTGAATTTGTTTTCTATTAA

>YLL018C 1.52 Hot

ATGTCTCAAGACGAAAATATTGTCAAAGCTGTTGAAGAAATCCGCAGAACCTGCTCAAGTTAT  
 TCTTGGGGAAGATGGTAAGCCATTGTCCAAGAAGGCCCTTGAAGAAATTGCAGAAAGAGCAAG  
 AGAAACAGAGAAAGAAGGAGGAAAGAGCTCTCCAGTTGGAAGCTGAAAGAGAAGCCCGTGAA  
 AAGAAAGCCGCTGCCGAAGACACCGCAAAGGACAACACTACGGTAAGTTGCCATTGATCCAGTC  
 TCGTGACTCTGACAGAACTGGTCAGAAGCGTGTCAAGTTTGTGACTTGGATGAGGCTAAGG  
 ATAGCGACAAAGAAGTCTCTTCAGGGCAAGAGTCCACAACACCAGACAACAAGGTGCAACA  
 TTGGCCTTTTTAAC TTTAAGGCAACAAGCTTCCCTTGATCCAAGGTCTAGTAAAGGCCAACAA  
 GGAAGGTACCATCAGCAAAAACATGGTCAAATGGGCTGGTTCATTGAATTTGGAGTCCATTG  
 TCCTTGTGACAGGTTATTGTCAAGAAGGTAGATGAGCCAATCAAGTCTGCTACTGTGCAAAAC  
 CTGGAAATTCACATTACCAAGATTTATACCATTTCCGAGACTCCAGAAGCATTGCCAATCCT  
 TTTGGAAGATGCCCTCCCGTTCCGAAGCTGAAGCTGAAGCTGCAGGTTTGCCCGTGGTCAACT  
 TGGACACCAGATTAGACTACCGTGTCAATTGACTTGAGAACCCTCACCACCAAGCTATTTTC  
 AGGATTCAGCTGGTGTGTTGTGAGTTGTTTCAGAGAATATTTGGCCACAAAGAAATTTACCGA  
 AGTACACACACCAAACACTGTTGGGTGCACCAAGTGAAGGTGGTTCAGTGTGTTTGGAGTGA

CATACTTCAAAGGGAAGGCCTACCTAGCTCAATCTCCACAATTTAACAAGCAACAATTGATT  
 GTGGCCGACTTTGAAAGAGTTTACGAAATCGGGCCTGTGTTTCAGGGCTGAAAACCTCCAACAC  
 CCACCGTCACATGACCGAGTTTACTGGTTTTGGACATGGAAATGGCTTTCGAAGAACATTACC  
 ACGAAGTTTTGGACACGTTGAGTGAGTTGTTTGTGTTTATTTTCAGTGAATTGCCAAGAGA  
 TTTGCTCATGAAATTTGAGTTGGTACGTAAGCAATACCCTGTTGAAGAATTCAAGTTACCTAA  
 AGATGGTAAGATGGTTCGTCTAACATACAAAGAAGGTATTGAAATGCTAAGAGCTGCCGGTA  
 AGGAAATTTGGTGAATTTTGAAGACTTGAGTACCGAAAATGAAAAGTTCTTGGGTAAGTTGGTT  
 CGCGACAAATACGACACCGACTTTTACATCCTAGACAAGTTCCCCTTGGAGATCCGTCCCTT  
 CTACACAATGCCCGACCCAGCCAACCCTAAGTATTCTAACTCGTATGATTTCTTCATGAGGG  
 GTGAAGAAATCTTGTCCGGTGCACAACGTATCCACGACCATGCTCTATTACAAGAAAGGATG  
 AAAGCCCATGGTTTGTCTCCTGAGGACCCAGGTCTAAAGGACTACTGTGACGGCTTCAGCTA  
 TGGGTGTCCTCCACACGCCGGTGGTGGTATCGGTTTTGAAAAGAGTTGTTATGTTCTATTGG  
 ATTTGAAAAATATCAGAAGAGCTTCATTGTTCCCAAGAGATCCAAAGAGATTAAGACCATGA

>YBL033C 1.57 Hot

ATGACCATAGATAACTACGACAACAGTAAACAGGATAGCAGCAAATACGAGGTTAGTGGTAC  
 GGGTGATGGCAGGAACGGCGATGGCGGCTTGCCTCTAGTACAATGTGTGCGCAAGAGCTCGTA  
 TCCCAACCACACAGGGTCCGGATATCTTTTTACATCTTTACAGTAACAACAGGGACAACAAG  
 GAACATCTAGCCATTGTGTTTGGTGAAGACATACGGTTCGCGCTCGCTATTCCGTAGAAGACA  
 GTGCGAGACGCAACAAGATAGAATGATCAGGGGCGCTTATATTGGCAAACGTATCCCGGCA  
 GAACTGTGGCAGACGAAGACGATAGACTCGGATTAGCTCTGGAGTTTGATGATAGTACAGGT  
 GAGTTATTAGCTTCCAAAGCCACTACATGGGACGCCATAACGACACGCTGGTACGGATCCA  
 TTCTGAATGTTACACCGGTGAAAACGCATGGAGCGCCCGTTGTGATTGTGGTGAACAATTCG  
 ATAGGGCCGGTAGGCTTATCGCTTGCACACCAGAACCCACAAGCAACATCAAAGGTGGAAAC  
 GGCCATGGTGTATCGTGTATCTAAGACAAGAGGGTTCGTGGCATCGGGTTAGGTGAGAAACT  
 CAAGGCCTACAACCTGCAAGACTTAGGTGCTGACACAGTGCAGGCCAACTTAATGCTGAAAC  
 ATCCCGTGGATGCTAGGGACTTCTCGCTGGGTAAGGCTATTTTGCTGGATCTTGGCATCGGT  
 AATGTCAGGCTGCTGACAAATAACCCGAAAAGATAAAAACAGGTAGATCATGCGCCTTACCT  
 TAAGTGCCTTGAACGAGTGCCATGTTGTTACCCATACACTGGACAAACTCCAGTGAAGGCATAG  
 ACTCCAAGGAGATAGAAGGTTATCTCAGGACCAAGATAGAAAGAATGGGTCAATTTACTAACG  
 GAGCCTCTGAAACTTCATACAAACCCTCAACCTACTGAGACAAGTGAAGCCAAAACCAAAA  
 CCGTATGAACTCTGCGTTGTCATCAACATCGACGCTGGCAATATAA

>YJL043W 1.9 Hot

ATGTTTGTGATTATTCCGGACTGGAGCGTTACACGGATATAAATGCATCTTTTTGGTAAAGTT  
 GGTCAACACTTACTGCTGTTTTTCAGCGCTGTGAAGCCATCAGCGAACAATTGGAGATTCTGA  
 AAAGTCTAGTACCAAAGTGCCACGACATTGTGGCACTTACTGACGAAGACTTTTGCTAGTGGC  
 CGTACTGCCGGACTGACGCAGAAATTTGTTTGCATATGGCGATGACCCTACACCAGATCACCGA  
 CTGTATCGACCTCCTGCAGAAATGCAACACCATAATACCCATCGAGATCGCCAACCCCGCTA  
 GCTTTGAAAGCGGCGCCGCGACGGCGCCGCTACGTCAAAGCTATGCTAGGCTCTTGGATGAC  
 TGGTCCCCTACATGGGCCCATCAACGGTAAAACACACAGGCTGTACCAACCGACCCAAGTG  
 GAGATTTCCCTGGCAACAGTCACGGACTATCATCATCCCCATGCTGTTTATTGGCGAAACTG  
 CAATGAGCACCAGGGACCTAAGGTCTGTGCTGCATGATTGTGAGATCAGGCACGCGAGCGAA  
 ATGCCGCTGCAGCTACTTTGGACGTCGTACCCGGAGTTGGTGTACGCCACACCGCATGTTGA  
 CGACTACGACATTTGGTTCGCGCTACGGGTCTGATTACAACATGCAGATAGAGGACGAAGACG  
 AAGCATCAAAGGGCGACAGCGCAAGTGTGTGGTGCAGTTGGAGGCACTGTTGGGTGCGCTA  
 CCTACTACGGACCCGTTGTTCCAATGGTAG

>YDL196W 1.67 Hot

ATGCCCTCCGAGTCAAGGAAAAGATTGTCTTCCAAAAAGGTGCAACTGTGCGTTTAGAATT  
 GGTGGAGAATTATGTGATATGCTTCTTACCCTCCTCTGCTTCTGCCTAATACCACACTCAT  
 CAATTGACTGGAGATCTGGCCTATCTTGCTACTACTTCATAGATTTTTTTTTTTTTTTCATCTA  
 TCCCCTTCCATCCCCTTCTGGTCTACCCCTTCAGCGTGAAAATCACCATACACGATCAAT  
 CCGCCCGAGAACGAAAAGTGAAAAGAACAACAAGTTCGTGTCAGATCCATTCCTCTATTCCT  
 GTAGTCCGGTTGCATTCTGA

>YIL044C 1.61 Hot

ATGTCGACGTCAGTCCCAGTCAAGAAGGCATTAAGTGCTCTTTTACGCGATCCAGGAAACAG  
 TCATTGTGCCGACTGTAAGGCGCAACTACATCCACGCTGGGCTTCCTGGTCACTTGGTGTTT  
 TCATTTGCATTAATGTGCTGGTATACATAGATCATTGGGAACGCACATTTTCGAAAGTGAAA  
 TCTGTTGATCTGGATACATGGAAGGAAGAACATTTGGTGAACTGATACAGTTCAAAAACAA  
 TTTAAGAGCTAACTCATACTACGAAGCTACTTTGGCTGATGAATTGAAACAGAGGAAAAATCA  
 CTGATACGAGCAGTTTACAAAAATTCATCAAGAATAAATATGAATATAAGAAGTGGATTGGT  
 GACCTCTCCAGTATTGAAGGGTTAAATGATTTACTGAACCAGTTCTGCATAAGCCGCTGTC  
 GAATCATTTCGTTGCCTGCTTCGAATGCAAGATTGGACCAGAGCTCAAATTCATTACAAAAGA  
 CGCAAACACAACCACCTTCCCACCTATTAAGCACCTCAAGGAGTAATACGAGCTTATTAAC  
 CTACAGTTTTCATCGCTTTCTAAGACTACATCTAATACAAGTGTAACTAGTTCTGCAACAAG  
 CATAGGTGCTGCTAATACCAAGACTGGCAACAGAGTCCGGTGAATTTGGGCAAAGGAACGATT  
 TGAAAAAATCCATTTTATCTTTATACTCAAAACCTTCTGCCAGACTCAAAGCCAGAATCA  
 TTTTTCACCTTCCACGACACCTCAGCCTTGTAACTACTCCGTCACCATTTCGTGAACACTGGAAT  
 TACCGCTACAAAATAAATAGTATGAATTCAAATTCAGTTCTAACATTTTCATTGGATGATA  
 ACGAGTTATTTAAGAACGTCTGGAGTTGA

>YDR475C 1.92 Hot

ATGGTGGTACGAGATCAAGATGAGGCGTTGAGAAATTCCTTATAAATATGTTAAGCTGTATGT  
 CAGGCAGGACCAGCTGGAGGATACGGTGGACATACTCGCTAAGCAGGACGAGGACAAGTCCA  
 ACAATGATGACAGGCGCAGTCTAGCCTCGATATTGGACTCGAGCAGTTCGGTCAAAAAAGAAG  
 GGGAAAGGCAGCAACGAAAAGTACCTACCATGCGTATCTTTCAACACAGTTCCCAGATCAAG  
 GGTATCTTCGCCCTTAGATGAAGAGAAAAGAGAATTTCTGGCGTGCAGATCTCTGCAGATT  
 ATACAATGGAGGAATATTATGACGACGAAAAGTGGCTTTACCTCGGACAACAATGCCGACTAC  
 TTCTCCGGGAATAGCTATTTCGAGTAGGCGAGAGGGCAGTGCTAGTCCCGGCAGGTATTCTTC  
 TCCACCTCCTGCCTCTAAAAGAAACATCAAAAATAGGTAAGATGTTTTAAGATTTCTGAAAATG  
 GTAAAATTGTAAGGGAAGACTATCCTACTACACCCACCGATATCAATGACGCTCTTGTGATT  
 AGTAGGGCGTATGCCAATTGGAGACAACATATGGATCAAGAAGAAAATCAGATAGATCATCG  
 ATTAGAACAAAAGCGGATTTCTTCAATTACCAACAATACTGTTTTCTCCAAACAAAAAAA  
 AGTCGTCTGAGGGCGCTACTCCCACAATAAAAATTCATCCTCCCATAGAAGACGGCTTTACG  
 CCTTTGACTAAGTCTCAAAAAGCGGAAAGAGCGTGTTTTGAGCGAAAAGGTTGGGTTCCCGAA  
 CACTCCTCGAACGATATTGTGCCACATCAGCGGCAGGAAACATACTTGGGTAGCACTAGATT  
 GGGCGCTACGAACTTTGATTCAAAAATACAGACCACATTGTTGTGTTGGCAAACCTGCCCGC  
 CTGACTAAGAATAATTTGAAAGACAATGATTCGATGAGTGAGCGAAAAGAATGCTAATGAT  
 GATGGATGATAGCAGGAGTGTAGCTCAGCAAGAAGATCACGATCCAGATCGAGATCACGAT  
 CCATATGTACAAGAAGGGCACTTTCTCTGGGGCCTGAGGAATCTGACAACAAATTAAGCAC  
 CAAAATTTTATCGAGTGGACATCTGGTTATACGCAGAACGAAATAGAACGTAAATTGCAAGA  
 TCTTTTTGATTATGTTACACTCATAATTCCGCAAGATCGTTCGTCAAGTCACTGTGCGAGA  
 TCCTAATTGGCAAGACTAAAAAACGCTTCTTGAGGCAATAAACATCTATTTACCTGATTTTC  
 TTTGTATCTAGCACTTTGGAGTGGGAGAGAACAGACAGCTTAGTTTCGTTGAAATCGAACTT  
 TCTGACAGATAAATGTTACTAATTTTCCGATTCCAACGTTTATTGTACCGGCAAAGAGAA  
 TGTTCGATTTGGAAATAGATTTGCAAAAAGAGTTTAAAGAACCGGAGGTAACGAAACAAAA  
 AATACTAGCGGTCCAAAGCCTGGGTTCCAGCCATTCTAAATCAGCAGATGCTAGCATTCCAAC  
 TATCTCAAATATCAAACGGAAGCAAGATAACGATTATTCTATAGATTCATGTTATGCC  
 CAGAAGCTAATGGTGCCTAACAATAGTAGCCGAGAGGAAGCATCTGATGATGAGCTTAACGCT  
 TTTAAGGATGATGAGAATGATGTGATGTCCGTGAAATCCTTAACCTCTAACATTTTCGGTAA  
 GGAAAAGTTATGTACCATGGCAAGGAAACGTAGAAAAGAGTATGGCTCAGCAGTTAAATGACG  
 CCGATCATGATTCATCAATACCACCGGACAGAGGCATTTGAAAAACTGAATATTATTTTG  
 GAATCTTCATTAAAGTTTTCATTAGAAATCGATAGCATCACTGATAGTATTGAAAATGGGGA  
 TGTAGACGAAAAGAGAGCACACTCTATGGAGTCCGGCTTTGAAGAACTGAAAAGAGTCATCA  
 CAGGTGGTGTCTTCCAAGGCATGTGGCTACCCCGCAGAGGTCATGCTTGATGTTTTGGAC  
 AATCCAAGTTCATCTAGATCCAAATCCAAGTCAAGATCAAGCTCTAAGTCAAGGATAAGAGA  
 CAAATCAAAACCAAGCTCTCTACTGCTACCGATATAAACTCAAGTGCAGTGCCTGCGAT  
 CACGTTCTCCGCAAATCAAGTTCGCGTCCGAGTGTCAAGAATGTAGATGGTAATGCTGCACTG  
 GGTGCTATTAAATCTAGGCACTCGCTAGACAGCCAGGGGACCAGCAACAACAACATCATCA  
 TCACCATCATCGTGACACAGATCAGTTGTCCGTTCCAGGCCTTCCCATTTGGCACCTTCAA  
 AGTCATATAGTGTGAGTTCTGGTAATAAGGATTCATCTTTGAGGAAAGTCAGTAGCTCATCT  
 TCGCTCAGAAAAGTAAAATCTAATGATTCGAACTCTGGTAAACGTATTA AAAAACCGGTCGT

AACTTCAGCACACTTGAAACCAAGCTCAGGCGGTGGTGGTTTATTCTCTTTTTTTAAGAGTA  
 AATCGAGATCCCCGTATCTTTCAGAAAGGAAGATGAGAGTAAAAATACGCCTAAGCGTGCC  
 GGATTGTTTGGGTTCGGAAGGCTGTAG

>YPL170W 1.88 Hot

ATGTCCTTCATTAAAACTTGTTATTTGGAGGTGTTAAAAACAAGTGAGGATCCAACCGGGCT  
 CACAGGTAACGGGGCCTCAAACACAAACGATTTCTAATAAAGGTAGTGAACCGGTAGTAGCGG  
 GTAATTTCTTTCTTAGGACGCTTCCAAATTTAACGGCCACGACGATGAAAAAATATTTATT  
 GCTATTAGGGGCAAAGTATACGACTGCACAAGAGGGAGGCAGTTTTACGGTCCAAGCGGGCC  
 ATACACTAACTTTGCAGGCCATGATGCGTGCCTGGTCTTGCATTGAACTCCTTCGATCTGG  
 ACGTTATTAAGATTGGGATCAGCCTATCGATCCCTTAGATGATCTGACAAAAGAACAGATT  
 GACGCACTGGATGAGTGGCAAGAGCATTGAGAATAAGTACCCATGCATTGGTACTCTGAT  
 TCCGGAGCCTGGCGTGAACGTATGA

>YDL170W 1.67 Hot

ATGAATTATGGCGTGGAGAAGCTGAAATTGAAATATTCGAAGCATGGGTGTATTACTTGCAA  
 GATCAGAAAGAAGAGATGCTCTGAAGATAAACCTGTGTGCCGGGACTGTCGTGATTAAGTT  
 TTCCCTGTATCTATATATCAGAATCTGTTGATAAGCAGTCTTTGAAAAAATAAAGGCAGAT  
 ATACAGCACCAGTTGATCAGCAAGAAAAGAAAGCATGCTCCTGACAGTGTGCAAGAGCGGC  
 CGTGGCCACCCGTACTCGACGGGTGCGTAGCGACGAACAGGATAACCAGGTATATTTGTCAA  
 AACCGCTGGAAGATTGCATTTCTCAGAAGCTGGACTCTATGGGATTGCAGCTGTACAACCTAC  
 TACAGGTCTCACCTTGCAAACATAATTTCCATCGCGCCCATGAACCAGAACTACTATCTGAA  
 CATTTTCTTGCCAATGGCCACGAGAATGATGGTATATTGTTTGCTATTCTTGCTGGTTCAG  
 CTAATCATTTGTCTATATCATCATCAAATGAGCTGCGAAAAGGATGAAATATTTGTCAACTTG  
 GCGAACAAGTATACATACATGTCGTTATCGCATCTAAAGACAAACGAGGGCTCAAGTGCCTG  
 TGCTAAACTGGGGTTTTCTATATTTACTAGCACAAATCCTAATCTTATGTGGTTTCAGAGATAT  
 GTCAGGGTGTGTAATTTTGGAAAGATATTATTGAATATAGGAAAAAATTTGATCGAAAAC  
 CATGTGGGCAAGGATGTCTCACGGATACTAACCTACTACAGAAGAACCCTCCCTAGAGGA  
 GAGGATAATCTTCCCAATTTCAATTCGTTGTTAAGTACTGGCTGATTGTGAATTTTATAT  
 ATCATGATATTTTGAATTTCAATACAACGTCCCTCCCGATCGAACAATACGAGAAATTTTC  
 CAAAGGGATCAGAACTCTTTACCCAGCTCAGCCAACCTTTATTGAGTCAATAGACTCGCCAAT  
 TGAGGAAATAGACCCTTTAATTGGCATCAACAAGCCTATTTTACTACTATTGGGACAAGTCA  
 CAAATTTGACGAGTTTTTGCAGACTATGGAACAGGAAGAAATGCTAGAGCATGGCGATAAA  
 ATTTTGAGTTTGCAAGTCGAGATTTATAAATTACAACCTTCGCTTATGGCGCTGGAACATTT  
 GGATGATGAAAAGAAATTTTACTATTTAGAACTATTTCGAGATAATGAAAATTTCTACCTTAA  
 TGTCTTTTCAATTAACCTTTATTAAGATTGACAAAGATTTCGCTGGAACCTACAGATACTGAGA  
 AACAAATTTGGACTCGAAGCTAGACAAGGTTCATCGGAACCTTTTTTGGAAAGGATCGTTATGCTT  
 CCCACTTTTTCATTTACGGTGTATGCATTCAGGTAGAAGATATGGAGAAAAAATAAGATTGG  
 AAGCCAAATTTGACGACATTTTAAAACGATATAAATGTTACAATTTCCAAAATGCTAGATTA  
 TTGATACGGAAAATTTGGCAAAACGAGGCTGATGGCATCAGTGAGCATGACCTGGTCCACAT  
 GATTGACGAATTAGATTACAATATTAATTTGCCTGA

>YIL121W 1.88 Hot

ATGGCAGGAGCAACATCAAGTATAATTCGGGAAAATGATTTTGAGGACGAGCTTGCGGAGAG  
 TATGCAGTCATATAATAGAGAAACTGCAGACAAATTGGCTTTGACTAGGACCGAGAGTGTA  
 AGCCAGAACCGGAGATAACCGCTCCGCCTCACTCACGCTTTCCCGTCTTTCAAGACAGTT  
 TTAATAGCTCAGTGCCTTTCACTGGGTTTTTCTCCACAATAGCAGGTGCCATCTACTATCC  
 AGTCTGAGCGTTATAGAAAAGAAAATTCGATATTGACGAGGAATTGGTGAATGTCACTGTTG  
 TAGTATATTTTGTATTTTCAAGGTTTGCCTTGCCTTGCCTTGCCTTGCCTTGCCTTGCCTTGC  
 GGCAGGAGACCGGTGGTGTGTCGCAATCGTCATTTATTTTGGTGCCTGCATCGGTCTTGC  
 TTGTGCTCAAACGTATGCTCAGATCATTGTGCTAAGATGTCTACAAGCCGCGGTATTTTAC  
 CCGTGATTGCGATTAACAGCGGAATAATGGGAGATGTTACTACTAGAGCCGAGCGCGGGGG  
 TACGTTGGATATGTTGCTGGATTTCAAGTCTTAGGTTCTGCGTTCGGAGCCCTTATCGGTGC  
 CGGATTATCATCTAGATGGGGATGGAGAGCCATCTTTTGGTTCCTTAGCAATTGGATCTGGCA  
 TTTGCTTCCCTAGCCTCGTTTTTAAATTTTGCAGAAAACAAAGAGGAACATATCCGGGAATGGT  
 TCTGTCACCCAAAATCATACTTAAATAGAGCTCCCATCTTGTGTTTTGCCAACAGTAAGAAA  
 ATCATTTGCATTTGGATAATCCAGATTACGAAACATTGGAACCTGCCACGCAACTAAATCTAC

TGGCGCCCTTCAAGATTTTGAAGCTTATGAAATTTGTATACTTATGCTAGTCGCTGGATTA  
 CAATTTGCCATGTATACTACGCACCTTACGGCGTTATCCACAGCTTTGAGTAAACAATATCA  
 CTTGACTGTTGCAAAGGTAGGATTATGCTACCTTCCCTCCGGTATCTGCACATTATGTAGTA  
 TTGTCATTGCTGGAAGATATTTGAATTGGAATTACAGGCGCAGATTAATAATATTACCAAAT  
 TGGTTGGGCAAGAAGAGATCAAAGCTTTTGAAGAACACGACAACGACCTTAATTTGGTGCA  
 ACGTATCATAGAAAATGATCCCAAATACACCTTTAATATCTTCAAGGCGAGGTTGCAACCCG  
 CATTTGTTACCTTGCTTTTAAGCAGTAGCGGATTTTGTGCGTACGGATGGTGCATTACTGTC  
 AAAGCCCCTTTAGCGGCCGTTCTTTGCATGAGTGGATTTGCGTTCGCTGTTTTCCAATTGCAT  
 TTTGACTTTTTCAACAACCTCTAATAGTTGATCTTTTTCCACGAAGACATCTACGGCTACGG  
 GATGTTTAAACCTTTTCAGATGCATTCTATCTGCTGTGTTTATAGCTGCATTGAGTAAAATG  
 GTAGAAAAAATGAAATTCGGAGGTGTTTTTACATTTTTGGGGGCTTTAACCTCCTCGTCATC  
 GATCCTCTTATTTATTCTCTTGAGAAAAGGTAAGAATTAGCCTTTAAGAGGAAAAAGCAAG  
 AACTGGGAGTAAATTA

>YOR224C 1.64 Hot

ATGTCCTAACACTCTATTTGATGATATATTTCCAAGTCTCGGAAGTTGATCCCGGTTCGTTATAA  
 CAAAGTCTGCCGTATCGAAGCCGCATCTACCACTCAGGACCAATGCAAACCTAACCCTGGATA  
 TAAATGTTGAATTGTTTTCCCGTCGCCGCACAAGATTCTTTGACAGTGAATTTGCATCCTCT  
 TTAACCTCGAAGACACCCAGCTAACGACTCTTCTGCGACAAGAAGCTGGAGACCTCCACA  
 GGCTGGTGACAGATCCCTTGACAGATGATTATGATTACGTCATGTATGGTACCGCTTACAAGT  
 TTGAGGAAGTAAGCAAGGATCTAATTGCCGTTTACTACTCATTCGGTGGCCTCTTAATGAGA  
 TTAGAAGGTAAGTATAGAAATTTGAATAACTTGAAGCAAGAGAACGCTTATCTTTTGATTTCG  
 TCGTTAG

>YIL042C 2.23 Hot

ATGTGGAAGATTATGCGTTCATGGAAATGTGGGGGAATGCGCTGGGCACATCGCCAGCGACC  
 CTCACACGAGCTGCTGTGCGCAACTGTGCGTTCGACCAGCATTACAAGATTAGGTGCAACATTG  
 AGCTGCTGATACAGGACTACGCTAGTAAACCAATTGCGCCCCCTAAACTACGAGTATTTCCCTG  
 CAATACAGGCCGCCGCTGACCAAGAAGGAGGAGTACATGCTGACGATCAAGACAATCAACCT  
 GTTGCTTTTCATTGACGTGTAAACGGCTTAATGCCATTCAGAGGCTACCGTATAATGCCGTAA  
 TCAACCCTCATATTGAGAGAACCAACTCTTTGTATTTGAAAAGCTTGCAAACGTTGCTATCA  
 ATCGCATACCCGTACGAGTTGCACAATCCTCCCAAGATACAGGCCAAGTTCACAGAACTGCT  
 GGACGACCACGAGGACGCCATTGTGGTATTGGCAAAGGTCCTCAGGAAATCCAATCGTGTT  
 ACCCAAAGTTTCAAATTTTCGAGTTCTTGAACCTCCACCTGAAGGAGAGAATCACGATGAAG  
 CTGCTTGTGACGCACTATTTGTCGTTGATGGCACAGAACAAAGGTGACACGAACAAAAGGAT  
 GATTGGAATCTTGCACCGGGACCTCCCATAGCACAATTGATCAAGCACGTTTTCTGATTATG  
 TCAATGATATATGCTTTGTGAAGTTCAACACTCAGCGGACCCCGTCCCTAATTCACCCGCCA  
 TCACAAGACATCACATTCACGTGCATTCCGCCATTCTGGAGTATATTATGACAGAGGTATT  
 CAAGAACGCTTTTGAAGCTCAGATAGCTCTTGGAAAGGAACATATGCCCATAGAGATCAATC  
 TTTTAAAGCCAGACGATGACGAGCTGTACTTACGGATACGGGACCATGGTGGTGGGATCACG  
 CCCGAGGTAGAGGCCCTCATGTTCAACTACTCTTACTCTACACATAACCAACAATCAGCTGA  
 CTCTGAGTCTACAGATCTGCCCGGCGAGCAAATCAACAACGTCCTCCGGCATGGGCTTTGGTC  
 TACCAATGTGCAAGACGTACCTAGAACTGTTTGGGGGCAAGATTGACGTTCAAAGTTTACTT  
 GGCTGGGGCACCGGACGTGTACATCAAGCTCAAAGGCCCTTCTAAGACTGCACTACTCTCCAA  
 AAAGTAA

>YFR032C 1.58 Hot

ATGACAGAACAAGTTAAACAATGACACTACCAGTGACACTACCCTACCATTACCACAGTTTA  
 CATTTCGAACCTGCCATTACGGCGAGTGAGCGAGACCTACATGCCTTCTAAACAACCTATG  
 GCGCCAGTTCAAGTGTGATTCCAACGCAGACCGTCCGCAGATTCAGCAAAAGGCACAATAGC  
 AACCTCGCAAACCACTAGGCATAGCATTGCCCAGTTTCGCAAACAATACTCTGGCTTTGAA  
 GGCCATTCAAGACTTGAACGGAACCGTTTTCCAAAATCAGAACTATTTCTAAAGTTACACG  
 TTCTTACGAGGCAGACTCTACTCCAGACACGGATGTAAAGAAGCCAAAGAAAAAATAAG  
 GTTAAGAAGACACCAGAGACTGCCGCGGATACGGTTTACTGTACGACCTGCCAGACGATAT  
 AACCGACAGTGAGATCCGTGAGTTGTTCCAGCTCTACTCGCCTCAAGAAATCTGGATTTACA  
 GGTCCAAGGTGTACAGGAGAAAGTGTATTCTTTTGTCCACACCAAATTAAGTCCGCTTTG  
 GTCACCTTGCAATCTGAAACCCCAATTGGGGACATTTGTGACAGTGTGGCCAAGACAGCTAC

TTTGAGGGGCAAATCGATAATAGTGAAGCCCGCTTACGTCTCTAAGATTCAAGAAATTA AAC  
 AATTGGTCAAGGACA ACTTAACCAATGCGCGGACCCACCTCCAGCAGCATTGGCAGAGCCA  
 GCGCCAGCGCCAGCGCCAGTAGAGCCAGCGGAGCAAGTGCAGGAAGGGCAAGACAATGCGGA  
 AACCAATGATGTCCACCTCCGCCTGCTTCGTCTTCCGATCGTCCAACCGTGGCTGCTACTT  
 AG

>YOL126C 1.79 Hot

ATGCCTCACTCAGTTACACCATCCATAGAACAAGATTTCGTTAAAAATTGCCATTTTAGGTGC  
 TGCCGGTGGTATCGGGCAGTCGTTATCGCTGCTTTTGAAAGCTCAGTTGCAATACCAGTTAA  
 AGGAGAGCAACCGGAGCGTTACCCACATTCATCTGGCTCTTTACGATGTCAACCAAGAAGCC  
 ATCAACGGTGTACCGCCGACTTGTCTCATATAGACACCCCCATTTCCGTGTGAGCCACTC  
 TCCTGCAGGTGGCATTGAGAACTGTTTGATAACGCTTCTATTGTTGTCATTCCTGCAGGTG  
 TTCCAAGAAAACCTGGCATGACTCGTGATGACTTATTTAACGTGAATGCTGGTATCATTAGC  
 CAGCTCGGTGATTCTATTGCAGAATGTTGTGATCTTTCCAAGGTCTTCGTTCTTGTCAATTC  
 CAACCCTGTTAATCTTTAGTCCCAGTGATGGTTTCTAACATTCTTAAGAACCATCCTCAGT  
 CTAGAAATTCCGGCATTGAAAAGAAGGATCATGGGTGTCACCAAGCTCGACATTGTCAGAGCG  
 TCCACTTTTCTACGTGAGATAAACATTGAGTCAGGGCTAACTCCTCGTGTAACTCCATGCC  
 TGACGTCCCTGTAATTGGCGGGCATTCTGGCGAGACTATTATTCCGTTGTTTTACAGTCAA  
 ACTTCCATCGAGATTAAATGAGGATCAATTGAAATATTTAATACATAGAGTCCAATACGGT  
 GGTGATGAAGTGGTCAAGGCCAAGAACGGTAAAGGTAGTGCTACCTTATCGATGGCCCATGC  
 CGGTTATAAGTGTGTTGTCCAATTTGTTTCTTTGTTATTGGGTAACATTGAGCAGATCCATG  
 GAACCTACTATGTGCCATTA AAAAGATGCGAACAACTTCCCCATTGCTCCTGGGGCAGATCAA  
 TTATTGCCTCTGGTGGACGGTGCAGACTACTTTGCCATAACCATTA ACTATTACTACAAAAGGG  
 TGTTTCCCTATGTGGATTATGACATCGTTAATAGGATGAACGACATGGAACGCAACCAAATGT  
 TGCCAATTTGCGTCTCCAGTTAAAGAAAAATATCGATAAGGGCTTGGAAATTCGTTGCATCG  
 AGATCTGCATCATCTTAA

>YBR231C 1.96 Hot

ATGCCAGAAGTAGAGACAAAGATTATACCAAACGAAAAGGAGGACGAGGACGAGGACGGCTA  
 CATAGAAGAGGAGGACGAGGACTTCCAGCCTGAAAAGATAAATTAGGTGGTGGTAGCGACG  
 ATAGTGATGCCAGCGATGGCGGTGACGACTATGATGACGGTGTGAACAGAGATAAGGGTAGA  
 AATAAAGTGGACTATTTCGCGTATAGAGAGCGAGAGCGGCGGACTGATCAAGACTAGAAGAGC  
 TCGGCAAGCTGAGGAAGAATATGCGAAAACACATAAGTATGAATCGTTAACTGTTGAATCGA  
 TCCCTGCAAAAAGTAAACAGCATCTGGGAGGAGCTACAGGAAGCTAGTAAGAACCGTCTTTTG  
 AGCAGTTCAGGGAAAGTTCGGCTCTGTTCTCGACGGTTCCAAGGAGGCTAGGTGCGACAACGGC  
 CGCGCAACAGGAGGACAAAATCCTCATCGAAAAGAACTACAAGTTTGCTGGTGAACCTGTCC  
 ATGAGAAAAAATGGGTTTTACGCAGCAGTGCGGAGGGTCAAGAATATCTAAACAGTTTGAAA  
 TTTAAGCAGCAGGCGCCTGCTGCTCCTGTTCAACTGGAAAAGCAGTTAGGACCAAGTCCAA  
 TGAAAGCCGGCAACACTTGCGACGGCCACTGAAAAGGCCCTCATTGTTGGAGCAGATCATTT  
 CTGGCGGGCTACGACCCAAGCTAACGACATTAGAAAAATCTCAGCTGGACTGGGCTAGTTAT  
 GTAGACCGTGCTGGACTTAACGACGAATTGGTGCTGCACAACAAGGATGGGTTCTTGGCCCG  
 GCAAGAATTTCTGCAGCGGGTTCGGTCTGCAGAGGACGAGAGATACAAAGAATTGCGCCGGC  
 AACAACTTGCTCAGCAGTTGCAGCAGGATAGCGAAGCTTCATAG

>YGL199C 1.92 Hot

ATGGAGATGTACGAAATCAGCGACACCCTCTGGTGTGGCTTGGTGAGTCTCAGATGCAATGC  
 CATCACCAGCAAAAATGAACCAACTAGACACAAATAGGCTCGAGAACAGCGACCCGCGCATGCC  
 ATACAAATAGAGAATACAATATGATAAACGCAAGGGGCGCCACAGGTGCAATTGGCTGAA  
 ATGTCGTTATCAGCCGCCCTATCCCCTCATCAGAGGGGCTAAAGAATGAGGGGAAATGCGG  
 GTATACCACTTGTTCAGTCTGGAATTAATCTCCACCACATCTCGCTTTAGTGTTCGAGCA  
 CAGTCTCGTGCAGCGTCCCTCTGCTGCCTGAATTCTGCATAGTTCCGCCTATGTTGTGAGCA  
 ACACCCCGGAAGCAGCCAAAGGTGCATCTGGTTCTATGAAGTGGGCTCAATCGTAGTGTCT  
 TTCTCTCCGATGACATTTTGCCTGCCCTCTTGTGA

>YDL139C 1.52 Hot

ATGAAAACCAATAAGAAAATTTCTAAAAGAAGAAGCCTGAAAATCTCCATGGTGCCTTAA  
 AGGACTATTGAAAAGAGTCCGGCAAGAAGAGTGAGTCCAAAATACGAAAACATAGCGATTGCA

ATCCTGTTCATCGAGTATATCCGCCAAATATCGAAAAACGGAAGACCAAAAAGGACGATGGA  
 ATTTACCGCCAATTGCTGAAAGAAATGGTCATGTGTATATAATGTCCAAGGAAAACCACAT  
 CATCCCTAAACTAACCGATGATGAAGTCATGGAGCGCCACAACTAGCAGACGAAAACATGA  
 GAAAAGTGTGGTCCAACATCATAAGCAAATACGAGTCTATTGAAGAACAAGGAGACCTCGTA  
 GACCTGAAAACCTGGTGAATAGTTGAAGATAATGGGCATATCAAGACGCTGACGGCCAACAA  
 CAGCACGAAAGATAAAAGAACAAAATACACAAGCGTGCTCAGAGACATTATCGACATCAGCG  
 ACGAGGAAGATGGTGATAAAAAATGATGAATATACTCTTTGGGCTAACGATAGCGAGGCAAGC  
 GATTCAGAGGTGGATGCTGACAACGACACTGAAGAGGAAAAAGACGAGAAATTGATAGACGC  
 AGATTTCAAGAAGTACGAGGCCAAACTCTCGAAAAGGATATTACGAGATTAA

>YKR048C 2.18 Hot

ATGTCAGACCCTATCAGAACGAAACCCAAAGTCGTGATGCAAATCGACAACGCCCTACGCC  
 TCACAATACCCCAGCATCGGTTCTGAATCCGAGCTATTTGAAAACGGCAACCCAGTTAGGG  
 CCCAGGCACAGGAGCAGGATGACAAGATCGGCACCATCAACGAGGAGGACATCTTGGCTAAC  
 CAACCCCTGTTGTTACAGTCCATCCAGGACAGACTTGGCTCGCTGGTGGGCCAGGACAGCGG  
 GTATGTGGGGGGTCTTCCCAAGAACGTTAAGGAAAAGCTGCTGAGCTTGAAGACTTTACAAA  
 GCGAGCTATTCGAAGTTGAAAAGGAATTTTCAGGTGGAGATGTTTGAGCTAGAGAACAAGTTT  
 CTGCAGAAGTACAAGCCATTTGGGAGCAGCGGTCCAGGATCATTTCAGGACAAGAGCAACC  
 CAAGCCGGAACAGATCGCAAAGGGCCAAGAGATTGTGGAGTCACTCAATGAGACGGAGTTGT  
 TGGTGGACGAAGAAGAGAAGGCCAAAATGATTCAGGAGGAAACAGGTGAAGGGAATCCC  
 TCATTTCTGGCTAACCGCATTAGAGAACTTGCCCATCGTTTGCACACGATCACTGACCGCGA  
 TGCGGAAGTTCTGGAGTACCTGCAAGATATTGGTCTGGAATACTTGACGGATGGTAGACCCG  
 GTTTCAGCTGTTGTTTTCAGATTTGATTCTTCCGCCAACCCATTTCTTACCAACGACATTTCTG  
 TGCAAGACCTACTTCTACCAGAAGGAGCTCGGTTACTCCGGGGACTTTATCTACGACCACGC  
 AGAAGGCTGCGAGATCAGTTGGAAGGACAACGCCCAACGTCCTGTGGACCTAGAAAATGC  
 GCAAGCAGAGAAAACAAGACCACCAAGCAGGTGAGGACCATCGAGAAGATCACTCCCATAGAA  
 TCCTTTTTCAACTTCTTTCGACCCTCCCAAGATCCAAAACGAAGACCAAGACGAGGAGTTGGA  
 GGAAGACCTCGAGGAACGTCTAGCTTTAGACTACTCCATCGGGGAACAACCTAAGGACAAGC  
 TAATTCCTAGAGCCGTGGACTGGTTTACCGGCGCAGCCTTGGAATTCGAGTTTCGAGGAGGAC  
 GAAGAAGAAGCGGACGAGGACGAAGACGAAGAAGAAGATGATGATCACGGCTTGGAGGATGA  
 CGACGGGAATCTGCCGAAGAGCAAGACGATTTTGCTGGCAGGCCGGAACAGGCTCCTGAAT  
 GCAAGCAGTCATAA

>YDR275W 1.64 Hot

ATGTTTTTTTTTCCCGAAGCTTAGAAAACCTTATAGGTTCAACTGTGATCGATCACGATACCAA  
 GAACTCATCAGGAAAGGAAGAGATCATGTCAAATAGCCGATTAGCACTGTTATTATCAACC  
 ACGCCTTTGATAAGGTACTATCTTTGACGTGGCACTGCGGGATATTATCCGAAATAAGATCA  
 GGACTGATGTTAATGTTTGGCATTTCAGTTGATGTGCTCTTTGGGTGTCATCGTATTGCT  
 GTTGCCATTATCATACTGGACCGCATCGATCTATTCCCTCTACATGTGCAGGTTGCTTGATT  
 ACGGTTGCAAGTTATTCCACTACAATAGATCATCATTACCGGTGGCAGATGGAAAAGAAAAG  
 ACCAGTGGTCCCATAAGCGGAAAGGAGGAAATAGTTATTGATGAGGAGATAATTAATATGCT  
 AAATGAATCCTCAGAATCATTGATCAATCATACTACAGCTGGTCTGGAATATGATATTAGTT  
 CAGGTAGTGTTAACAAAAGTAGGCGTTTGAATTCAACTAGTACAGTTACATTTGTGAAGCAG  
 AATAAACTTGTTAATGAAAGGAGGGAAGACGCCTACTACGAGGAAGAGGATGATGATTTCCCT  
 ATCAAATCCGAATTATGATAAGATATCATTGATCGAAAAATCATTACGAGTCTGTTTTGAAG  
 TGGCTTGTGAGCAGAAAAGCTGCTTAA

>YMR264W 2.08 Hot

ATGGAGGATTCGAGATTGCTTATCACTTTGATTCTTGTGTTTGGAGTTATATTTCTGAAAAA  
 ATCTTCCAAAGTAATCAGCATCCCTCAGCACACGCTTATCCGCTACAGGTGTAACGCAC  
 ACGGACGTCCTCAGGGCTCCACGCAGAATGCCTTGAGAAGGACTGGTAGAGTCAATGGAGGT  
 CACCCCGTGACTACTCAGATGGTGGAAACAGTGCAAAATCTAGCCCTAACTTACATCCTGA  
 GCAAATTAGGTATAGTTTGGAAAACACAGGCTCAGTCGAGGAAACAGTGGAAAGGTACTTGC  
 GTGGTGTGATGAATTCAGCTTTCCACCTGGGTTTGGAGCCCTCCAGGGCGCCAATGGGGGCCAAT  
 GCGGCTGTTGATAATAACGCTGCTGGTGGCGGAGAGTTTAAACGATCCCAGAAAGAAGAACAT  
 GATTTGCGCTGAGAATCTACTCGATAAAATCCATGTGGATCTCAATGAAGATATGAGTAACT

TAAGCTTTAAGGACTTAGACATTGAAGAGAGAAAGAGATTGTTGGTTTTGGCAAGCCAGAAAAG  
AATTTGGAGACAAAATTGCAAAGTGATAAAAGATTTGCAAAGTTTGCTGACTTGA

>YJL063C 2.08 Hot

ATGACAGTGGGTATTGCTAGGAACTCTCTAGGGACAAGGCGCATAGGGATGCGCTGCTAAA  
AAACCTTGCGTGCCAGTTGTTTCAGCATGAATCTATAGTGTCAACGCATGCCAAATGTAAAG  
AGGCTTCCAGGGTCGAGAGCGGATCATTACCTGGACAAAAGAGGGCAATAACGACAAGTAAT  
AGTGTTCACAGGCGGAATTAAGTCCCAAATTCAGAGCCAATTGTTTTTAGCAGGAGACAA  
CAGAAAGTTGATGAAGCGGTTGTTTCAGCGAGATCGCACCGCGGTAAGGCGCCGGTG  
GGTACACGCGTGTGCTGCGGTTAGAGCCTAGGGCTAACGACTCAGCGCCGCAATCCGTCCTG  
GAACTAGTCGACTCTCCCGTGATGTCCGAATCGCATAACGGTGAACAGGGGCAATTTAAAGAT  
GTGGCTGTTAGTCAAGTCAGTCATCAACGATGACGCCAACAGCTACCTCATAACCCACTCA  
CATTGCAGAATCTTCACAAAGTGGCCAAGTTTAAAGCAGAAGCGCAGCTACATGGTGAAATTT  
ATGCTCATCAAGCAGGTCTTACTCAAGGAAATGTCCCTTCCCTATGATGAGGCACTCGAAAA  
CGAAAGGACGCAGGCACTTTTGAAGGAGGTCTACTCTTCGTCATTGCCAAAGAAGACGAAGA  
AACCCTCCTCCTATGTCATGGTTCCCAGACCTTAA

>YGR059W 2.27 Hot

ATGAAGTCAAAAAGGAGTCCGGTTGTCAACAGACTGTCCTGTCGAATTTCCCAAGATAGTCTC  
TGGATTCGCTGAGGAAGTGAATAACGTAGACAAAGTTCCCAAGGACAGTACGCCGTCGATT  
CACATCCTCCGAAAAGCCCTGAACTGAAACACAGAAGACAGAGGTCATCCTCTTTTGTAAAC  
GGTAAATGCAGGAACAGGGACCTTCCATTGTTAGATAACAAGAAAGCACAAGAAATAAACAC  
CAATTCACACGGCCAAGACATCGGTATCAAAAACCTTACCACGTCAACGTGAGTTGTTGAATG  
CCAAAAATGGAATTGATTTTACGCTGATGGTGGCGGGTCAAAGTGGATTGGGTAAAACCACG  
TTTATCAATTCCTTATTTTTCTACTTCTTTAATTTGATGATGACATCAAAGAAAACAAACCTAT  
TATTCGTTATAAAAAGCATTGTAGAAGGAGATGGAACACACCTTAATTTCAACGTCATCGATA  
CACCTGGTTTTTGGTAACAATATGGATAATGCATTTACGTGGAGGACAATGGTTAACTATATT  
GATGAAGAAATAAGATCGTACATTTTTCCAAGAAGAACAACCTGATAGGACAAAATGGTTGA  
TAATAGAGTCCATTGTTGTTTGTACTTTCTGAGACCTTCAAATAAGGGAATTGATACTTTAG  
ACGTCGTAACAATGAAAAAATTAGCGAAGAGAGTGAATTTAATCCCGGTTATTGCTAAATCA  
GATTTGCTAACGAAAGAGGAATTGAAAAACTTCAAACACAAGTTAGAGAAATAATAAGAGT  
ACAAGATATCCCTGTATGTTTCTTTTTTCGCGCATGAAGTTTGAATGCAACACAAGATATTT  
TTCAAAAATATCCATTCAGTATAATTTGCATCTAATGAGTACATTTTTTAATGAAAAGGGCGAA  
AAAGTTAAAGGAAGACAATACAAATGGGGCGCTGTTGACATTTGAAAATGAAAAGTACTGTGA  
CTTCAAATCTTGCAAAGACGATTTTTTGATTGGAATTTAATTGATCTTGTAGAAAGTACCG  
AGGATTATTATGAAAAATGCAGATCTGAAATGCTAAGAAGTGGCTATTAAAGGCCAGAGAT  
TGCTTAACAACGAAAAGTGTGACATAACGGAAGAACAAGGAAATTTTTGGAGGAAGAAAT  
GAACTTCGATGAAATCGAGGAAAACAACCTCAAATAATCAAGTGTATGAAATAATTAATA  
AAACGGTCATGGATAAGGTGGCTACAGAATGGGATCCTGAATTTATAACTAGACAATTAGAA  
GCTAAGAAAAAATTCAACGAGCTGTCCAACAGAGAAATTTCAAATTTTCGAGACTGGAAAAA  
GAGCCTATTTCATGGAACAAGAGAATTTTAACCAAGAGATTGAACAATTGAATCACAAGTTGG  
AAAACTTACAACGGAATGTCAGGACTTGAATACAAGCTGTTAATCGGAAAAAAGTTCCAAC  
AGCCATTCCACAGATAGTGCTACTTTAGTAAACGTTTACATCAAAGGTTAG

>YDR231C 1.96 Hot

ATGCGTTGGTGGCCGTGGTCAAATCAGACAGAAGATCAAAGCAGCAGCAACAACCCGAGGG  
TAAAGCAGATGGTGATCGCGTGCTGACAAATTAATCGCGGGGTCAAAGATCCTCTTAGAAG  
ACACTCCACCCAAGTTTGCCGATGACTTGTCCAATTTCTCAGTTGGCCAAGAAGCAAGAACGG  
GCTACTTTGAAAAGAGGCTTGGGACTCGATCAGATGGAGTGATTTTAGTTGTCAGAAGCTGAC  
TTCAATCCCGTGCTTCAGAGACGCGGGCATGCTCGGGTTTTCCAGCATGTTCTTGATGGGAT  
CTATTATATTTATATAACCATAAGAGCCCAGCTAAGGCCACGAATTGGGCGATGAGCTCTCTG  
ATACTGGGCTCGATTGTGCGGATGGGAGCAATGTAGGCTAAAGAGACAAAAAAGTTTCCAGAT  
CGCACAATTTGGCAAAGGAAACCGTGGCGAAAAAGGAAAAACCAATGCTCCATAATGTCCCTC  
ATGACCCATCTCTGCCGGGGCAATGGGAGGCCGCAAAAATGAAAAGCAGAGTCAGTTTGAA  
CAAAGTAACCAGAAATTTATCTCAGGCCTCCTCTGAGAAGAAATGGTACAAGTTCTGGTGA

>YAL020C 1.68 Hot



ATGAGTTGTGTGTATGCGTTTTGGGTCTAATGGGCAAAGGCAACTGGGACTGGGGCACGATGAGGATATGGATAACCCACAGAGGTCTGTGCCAGGAGATGATGGAGCAATAGTCAGGAAGATAGCGTGCGGTGGGAACCACAGCGTGATGCTGACAAATGACGGGAATCTGGTAGGATGTGGAGATAACAGACGGGGAGAAGTGGATAGTGC GCAAGCACTGCGGCAGGTGCATGACTGGAGGCCCGTGGAAAGTACCGGCACCCGTGGTGGATGTGGCGTGC GGCTGGGACACGACAGTTATTGTGGATGCTGATGGCCGTGTATGGCAGAGAGGAGGCGGTTGCTACGAGTTCCTCAGCAACATGTGCCATTGAATTCCAACGATGAGCGCATCGCAGTATACGGATGTTTCCAGAACTTGTGGTGGTGCAGGCACCCGAGTATACGGCTGGGGCAGCAACACAAAGTGTCAATTGCAAGAGCCCAAATCCCGATCACTGAAAGAGCCCGTATTGGTGTACGATACCGGGTCTGTGGCCGTAGACTACGTGGCCATGGGCAAGGACTTCATGGTCATAGTGGACGAGGGCGCCGCATAGTGCACGCATCCGGTCGCCTGCCACTGGGTTCGAGCTCAAACAACAGCAAAAAGACACAATCTAGTGGTACTGTGCA TGTGGACCTCGATCCACCTGTGGAATGCGCGCCTCAATACGGTAGAGTCGTTTGGTAGGGGCACACATTCCCAACTCTTCCCGCAAGAGCGCCTAGACTTCCCTATTGTCCGGTGTGCAACCGG GAGTGAGCACGGTATTCTAACTACTGCTAATCAAGAAGGCAAGTCTCACTGTTACAATGTAT ACTGCTGGGGCTGGGGAGAGCATGGCAACTGCGGCCCGCAAAAGGCGTCCAGCCTGGACTG CAGCTCGTGGGCCAATACTCTGGAAAACCTCGCGTGTTTGGCGGATGTGCCACCACGTGGATCGTGCTCTAG

>YGR079W 1.75 Hot

ATGAGCAGTGCCGCAAATGAGGGATGTGTTTATTTGTTTCATTGTTCGTTTTGCGATTATCTTCGTTTTTCATGTGTTAACTCATTCATTTCATTTACTCGTTCACGCACACGCAGCAGTTATTCCCTCGACGAGCGTTCACCTGTATCATATAGCATAGTTTACGTAGCAATGAATAAAAAGCAGCAAGGCATTTACAGGTACCGAATAAGGTCATCACCAAGGAGGATATTACTCCCTTGTCCAGATCGCACAAAAGAAAAGCGGACACTCGCGGGACAGCAGATGGTAAAAACACCACAGCCAGTGCAGTCGAGGCCACCCCAATCATCATCACCACTGCTCGTTCGATAGATACTGCCGGTTCACTATCTGAGAACGCCACCGAGGACGATGGCACCCAAAACGGAGATTTACACGATGATGACGATGATGACGACCTCGAAAAGTACGCTCGGCTATAGTTCTGAGCCTGATCCTCTCTTCTCCCATGCCACCAGCCTTCCTTACCAACAGCACATTTAGTTACAGTGC GGACAATGAACTACCCATGGAGGAAATCACAAACAAGAATAATTTCCACGATAGCAGCGAGAGCAGTATCTTTCTACCACAGATACAGCAATCATTTCTTTTCGCGCACAATAGCAAGAGTGACGCAAATAATACGGACTTCTGGAAGGAAGTAAATGGCACTGCAGAAGAGGCCATTTGCCTGCAGGAGACAAGACAAAAGAAAATGCTCCCTCGTGGCTCTGCATCCAGGCGACGCCACCACGAGTTCGAACGACACATTGGGAATAGAGGACTTCATCAAAGATGATATCAACAGTGCTGAAGCCATGGAACCTCCCATCTTCATCACCATCTTCTCCCTTCTTGATAAATTTGGACTACAATATCAAGTTATTGTGCTACAGAGACAATGAGGGCAAGTTCACCTTGAAAAAAGGAAGTTTTTGAAGAATTCCTGCGCTCATCCTCTGCAATTTCTAAAAGTGGAACCTTGTCTAAAAGAGATAAGCTGTTGAAGAGGGCCATAAGAAGAAAGAGTGGTGTGGCCAGACGTTATCAGCTGGTTTTTGGTATCGGTGAATTCATGTTGTAA

>YCR046C 2.44 Hot

ATGTGGAGCAGGAACGTAGATTGCTTGGATCATGGACAAGGTCCTACATGGTCCCCGCCACCAAGAGAAAAACCATCCCCGTGTAACCACTGTGCAGCGCATAGCTTCGTTCGAGATTATGAGCAGGTGGCCCTCTCAGAAATAGAGTCTCTGGATCCCGGGCCGTTAAGAGGAAGCTCATCAGTAAAAAGAACAGGACCGCTTGAAGGCAGGCGACGTGGTCCGGATTGTGTACGACTCGTCAAGTGCTCGTACGACACCTTTGTTGGCTACATCCTTTCCATAGACCGCAAACAAGTGGTGC AAGACGCCTCGTTGCTGTTGCGGAACCAGATAGCCAAGACGGCCGTGAGATTAGAGTGCCATTGTTTTCGCCGCTGATCGAGAGAATCGACTTGCTAACCCCCACGTCTCGAGCAGACAAAGAAACAACACTACTACATCAGAGGTACAAGTTGGATGTGCGCGACCTCGAGGCAGGTCTAAGAAGAAAGAAATAG

>YBL113C 1.55 Hot

ATGGACTTGAATCAAAGAAAAGGAAAAAAGGGCCAGCATGTTGGATGCTGTGGCTCCAGGACAGACCTGTCTGTGACACAGTGGAACTGATAGAAAGAAATGGACAGATTGGCTGAAAATCAGGCGACAGCTTCCATGTCGATCGTTGCGTTACCGTCTAGCTTCCAGGAGAGCAATAGCAGTGACAGGTGCAGAAAAGTATTGCAGCAGTGATGAGGACAGCGACACGTGCATTCATGGTAGTGCTAATGCCAGTACCAATGCGACTACCAACTCCAGCACTAATGCTACTACCCTGCCAGCATCAACGTCAGGACTAGTGCAGTACCCTGCCAGCATCAACGTGAGGACTAGTGCAGTACCCTGAAAGTACCAACTCCAGCACTAATGCTAC

TACCACTGCCAGCATCAACGTCAGGACTAGTGCGACTACCACTGAAAGTACCAACTCCAGCA  
 CTAATGCTACTACCACTGCCAGCATCAACGTCAGGACTAGTGCGACTACCACTGAAAGTACC  
 AACTCCAGCACTAATGCTACTACCACTGCCAGCATCAACGTCAGGACTAGTGCGACTACCAC  
 TGAAAGTACCAACTCCAACACTAATGCCAGTACCAATGCGACTACCAACTCCAGCACTAATG  
 CTACTACCACTGCCAGCACCACGTCAGGACTAGTGCTACTACCAATGCGACTACCAACTCC  
 AGCACTAATGCTACTACCACTGCCAGCACCACGTCAGGACTAGTGCTACTACCACTGCCAG  
 CACCAACGTCAGGACTAGTGCTACTACCACTGCCAGCATCAACGTCAGGACTAGTGCTACTA  
 CCACTGAAAGTATCAACTCTAGCACTAATGCTACTACCACTGAAAGTACCAACTCCAACACT  
 AGTGCTACTACCACCGAAAGTACCGACTCCAACACTAATGCTACTACCACTGCTAGCATCAA  
 CGTCAGGACTAGTGCGACTACCACTGAAAGTACCAACTCCAACACTAGTGCTACTACCACCG  
 AAAGTACCGACTCCAACACTAGTGCTACTACCACTGCTAGCACCACACTCCAGCACTAATGCC  
 ACTACCACTGCTAGCACCACACTCCAGCACTAATGCCACTACCACTGAAAGTACCAACGCTAG  
 TGCCAAGGAGGACGCCAATAAAGATGGCAATGCTGAGGATAATAGATTCCATCCAGTCACCG  
 ACATTAACAAAGAGTCGTATAAGCGGAAAGGGAGTCAAATGGTTTTCTAGAGAGAAAAGAAA  
 CTGAAAGCACAATTTCCCAATACTTCCGAGAATATGAATGTCTTACAGTTTCTTGGAATTCG  
 GTCTGACGAAATTAACATCTTTTCTCTATGGTATTGACATATACTTCTGCCCAGAGGGAG  
 TATTCACACAATACGGATTATGCAAGGGCTGTCAAAGATGTTCCGGGCTCTGTGTCTGTTGG  
 GCTGGCCAGAAAGTATCGTATCGGAGGATAGCTTGGGAAGCACTAGCTGTGGAGAGAATGCT  
 GCGAAATGATGAGGAATACAAAGAATACTTGGAAAGACATCGAGCCATATCATGGGGACCCTG  
 TAGGATATTTGAAATATTTTAGCGTAAAAAGGAGAGAGATCTACTCTCAGATACAGAGAAAT  
 TATGCTTGGTACCTGGCCATTACTAGAAGAAGAGAAACAATTAGTGTATTGGATTTCGACAAG  
 AGGCAAGCAAGGGAGCCAAGTTTTCCGCATGTCTGGAAGGCAGATCAAAGAGTTGTATTATA  
 AAGTATGGAGCAACTTGCCTGAATCGAAGACAGAGGTGCTGCAGTACTTTTTGAACTGGGAC  
 GAAAAAAGTGCCGGGAAGAATGGGAGGCAAAAGACGATACGGTCTTTGTGGAAGCGCTCGA  
 GAAAGTTGGAGTTTTTTCAGCGTTTGCCTCCATGACGAGCGCTGGACTGCAGGGTCCGCAGT  
 ACGTCAAGCTGCAGTTTTAGCAGGCATCATCGACAGTTGAGGAGCAGATATGAATTAAGTCTA  
 GGAATGCACCTTGCAGATCAGCTTGCCTGGGAGTTACCCCATCTAAAGTGCCGCATTGGAC  
 GGCATTCCTGTGATGCTGATAGGGCTGTTCTACAATAAAACATTTCCGGCAGAAACTGGAAT  
 ATCTTTTGGAGCAGATTTCCGAGATGTGGTTGTTACCACATTTGGCTTGATTTGGCAAACGTT  
 GAAGTTCTCGCTGCAGATAACACGAGGGTACCCTGTACATGCTGATGGTAGCGGTTACAAA  
 AGAGCTGGATAGCGATGATGTTCCAGACGGTAGATTTGATATAATATTACTATGTAGAGATT  
 CGAGCAGAGAAGTTGGAGAGTGA

>YLR187W 1.76 Hot

ATGAAAAGGATTTTCTCTGGTGTGAAGTCCCCAAAGTTATCTGCTCCCCAAAAGTTTTCAA  
 AAATGATGAGAGCCCATCCACTCCGAGCTCTCCCAAATTCGACCAAGGGCTTCGAAGTTTAT  
 CAGCATCAGCTTCAAGACTCTTCAGTAACCTCAATATCCACTCCTGGGAGCCCTACGTTAGAT  
 CTTCCGCAAGAACACTCTATTAATGGTGATATCTCACCAGAAGTACCAATCGTTACTTT  
 ACTCTCTGCACAGGCTCATAGGAGATAACCATTATGGTATATTTCTTGATATTACATGATTTGA  
 AGACAGACGGAACACCTGCCGCGCGTCAGTGGGAAGAATGCTATGGTGTGTTGCTAGGAACT  
 CAGCTGGCTTTATGGGATGCAAAAGAATTATCAGATTCCAAGAATAATAAGAACACATCAAC  
 CATGAAAAAAGCCGCATCGAGACCTTCTTTTATCAATTTTACAGATGCTTCTGTGAGGAGTT  
 TGGACGCTAATGATCAGGTAATCATTGCATCAGAGAACGAAAAGACAAAAGAAAGATCTAGAC  
 AATGTTCTTGTGTTTCAACAACTTTAAAAAACAGGTATTTCTTAAAAATCAAAAATTCAAA  
 ATCATTCAAAACTTGGAACGCAGCAATTAGGCTTAGTTTTGTTTCGAGTTTACGGCGTTGCAAG  
 AGGCTTACACGGGCTCATTTTTGTCAAGCAGAGGTGTTAAACTTGGTGATATCAAAGTTGTT  
 ATGGCAGATACAAAATTCACTTATGAGGACTGGGTTAGCGTAAGATTCCGGACAGGTATGCC  
 ATGAAAACGTTGTTATGCTGTTATTTCTCCACAGTCTGGCAAAAAAAGAAAAATTCGAAAG  
 GTTCAATATGTTTCTATGAAAATAACAAAAAACCAAAAAATCAAACATAATGACAACGGTA  
 GTAGATGCACGGGCTTTATATGCCGTTTATCCTTCCCTCGCCGATATTAATCGACACATCTAC  
 AATCATAAAATTTGGAAGTTTTGTCTCTTTTGACAAAAGTGAGGAACCTCAAGAAACCAACC  
 TATTTATCATGCCTGAAAAGCATCAAGGTGTTCCGGGATATGACACTATTATTCGCTTCTTA  
 ATCCCAGCTATGAACGCTTCTACTTATATGGTAGGCCAAAGGGTTTGATTGCCAACAGAAC  
 TGACCCAGACTCCCTGCTGTTTGCCTTACCACTCTTCCGCATATATATTTTGCAGGTGG  
 ATGACGTTTTATCATTAACAAAAGACAAAAATTAACATACATTTGGAGTGCTGCTGATTGGAGG  
 AATAACATTTGTTCAAGTATTACAGAAAAATTAAGTAAGGGCTATAAAGGCTGTGGTAATAA  
 AACTGTATCAGTTTCATCTGGGATGATGAAGTCGCCGGCAATTAGTTTCAGCTGAATTTTG

AAGGGTACGATTCTCTCCCTGAAAGACAAATGGAAAGTCCGCAAAAATCTAAGATGAAGTCT  
 CCTACATTAGCATCGACCGATGATATTAATTCGGCTTCTGCTTCCGTAAACTCACATGCTAC  
 CTCAGTAAAACAAACTGAATTAATTTGTGACTGATAATTTCTTCAAAAATCAATGACTCTGTGT  
 CGGCGCAGTCCAGTGTCACTACTAACTTCAAAGATACTTTTACCACCCCAATGACATCAGGA  
 ATGCTCAACCATGAAAATTCAGAGAGAAGCTTTGGTTCAGGATTAAAAATCAAAAATCACTGA  
 TTCAAATTTGGAAAATATGGAAGACGTTGAAGCGAAATCTGCTAACGAATTTCTCTACGACAC  
 CAGAAGACAAACATATTCACCTCGCCAATGCAGCCGAATTATCCGCCCTTACGACAAAATAT  
 TCCACATCTCCGTTTGGTAAATCGGAGGCTAATTCAAGCCCTAAACCTCAAAAATTTGGAAGT  
 TAAAGATCGGTCAAAAATGAAAACAGAAGCCCTATGAGAGATACGTAGGTACATCCGCTG  
 AAAGCAAGACATTTGAAATAGGTAACGTGAGAGAGTCAAAAAGTACGATAAATACTTCCCTT  
 TCTTCGCCTTTGAGGGTAGAAGATAGTAGACGTTCAAAAATGAGGACCTGGGATCTTTGAA  
 AGAGTTTGAAGAGTTATCTCAAAGATTAGCAATATGGGAATGGCAAATATTTCTTCAAGAG  
 CTTTAAGTGACACAGCAGAAAACAGTTCTTTTGTACGGACCTGAACTTGAATATCAATAAC  
 AGTTCATCGGTCAATCTCAATGAAGAACAACGTGTGCCGGATTTTGGGGAGGAAAACGTATT  
 TGATCCAGATTATATGGAACAAAACCAAATGTTGGAAACAGAAAGTAGGTACACTACGGATG  
 AGTTTGACTTTTTCAGATAATCAGGATGCAGCATCCAGTAATTATAGCAATGGGCAAACCAAC  
 CGAACAGTAACTGAAACCCTTCTGCCAGTGACAGAAAATGACAAGATCCCACATTTCTTCTTT  
 ATTTACAAACTTAAACCAGCTTACTTTCGAATGGAGGAAAATATCAGGATAGGGAAGATTTCT  
 CTGGTGATCAAAATAAACAAACCTCAACAATCTCAACCACTTCATGTGAAAGGACCACAAACT  
 TCGTCATTTGGTTACAGAAAATTTTCAGCCAATAGCTCGCAGCCTCAAGCACCATAACCCGGT  
 TGGTCGCCCGTTAGGTAAGATAAGAACGGGTCCGCTGACCGTCCAGCCTATGCAACAAGGTG  
 GAAACTCATCAATGTATTCTTTCCAATCTTCGCAACATCGGTTTCATTCGTGCAACAGCGC  
 CAAAACCAATCACTTTTCTTCAGAAAACAATACCTATGGAAGTGGTAACAATCAAAAATACATT  
 CCATCCATCGCCGCAACTGCAACAACAGCCTCAAAAATATGAGATATTTGAATAATAAGTTAC  
 CAATAAATGATAGATCTCCAATACCGCAAAACAGCACCATGTACCAGATGGCCGTCCAGC  
 CTCCATATAAATACCACTAACCAGCACAATCCGCTTACTGCACAAAAGTGGATTTTCTCAATT  
 TATGCCTCCCAATAGCACATCAACCAACCCATATTTCCAGCTGA

>YAR042W 1.57 Hot

ATGGAACAACCTGATCTATCGTCTGTGGCCATCAGTAAGCCGCTGCTGAAGTTGAAACTTCT  
 CGACGCCCTTCGCCAGGGAAGTTTCCCAACCTACAAGATCTCCTAAAGAAACAATTCAGC  
 CGCTAGACGACCCAAACGTCCAACAAGTGCTCCATCTCATGCTCCACTATGCCGTGCAAGTC  
 GCCCCATGGCTGTATAAAGGAAATCGTCCATCATTGGGTCTCAACTACAAACACCACTTT  
 TCTAAACATCCATCTTGATCTAAACGAACGGGACTCCAACGGCAACACCCCATTCGACATCG  
 CCGCTACCAGTCCCGCGGTGATATCGTAGCCTTCTCCTGGACCAACCAACCATCAACGAC  
 TGCGTGCTCAACAACCTCCACTTGCAGGCCATCGAAATGTGCAAGAACCTAAACATCGCGCA  
 GATGATGCAGGTGAAACGCTCCACATACGTTGCAGAGACCGCCAGGAATTCAGAACAGCTT  
 TTAACAACAGGGACTTCGGCCACCTAGAATCTATCCTCTCCAGCCCTCGAAACGCAGAAGTG  
 CTCGACATCAACGGTATGGACCCGGAGACTGGCGATACCGTTCTGCACGAATTCGTCAAGAA  
 AAGAGACGTCATCATGTGCCGTTGGTTGCTTGAACACGGTGCTGACCCCTTCAAGAGAGACC  
 GCAAGGGCAAACCTGCCATCGAGCTCGTTAGGAAAGTCAATGAAAACGACACCGCCACCAAC  
 ACCAAGATCGCCATCGACATCGAACTGAAAAAATATTGAAAGGGCCACCAGGGAGCAAAG  
 TGTCAATCGACGTCACAAACAACAACCTGCACGAGGCCCCCACTTACAAAGGCTACCTGAAAA  
 AATGGACCAACTTCGCTCAAGGCTACAAATTCGCTTGGTTCATCCTTAGTAGCGATGGGAAA  
 CTATCCTACTACATCGATCAGGCCGACACTAAGAATGCCTGCAGGGGCTCCCTAAACATGTC  
 TTCGTGCTCTCTGCATTTGGATTCGTCTGAAAAGTTGAAATTCGAAATATCGGCGGTAACA  
 ACGGTGTTATCAGGTGGCATTAAAGGGGAACCACCCCATCGAGACAAATAGATGGGTTTGG  
 GCCATCCAGGGCGCCATAAGATACGCAAAGGACAGAGAAAATTTGCTGCACAATGGCCCTTA  
 TTCGCCTTCTCTGGCCTTAAGCCATGGCTTGTATCCAAAGTGTCCAATAAAGAAAACCTTGC  
 ATGCAACTTCAAAACGGTTGACCAAGAGCCGCATCTGTCCAATCCACACTGACACAAAAC  
 GATCACGATAATGACGATGACAGCACTAACAACAACAACAACAAGTAATAATGATTATGA  
 CGATAATAATAATAATAATAATAATGACGATGATGATTATGATGATGATGATGAAAGTAGAC  
 CCTCATAGAACCATTACCGTTGATTTTCATCCAGAAGCCAAAGCTTAAAGCGAAATCACTCCC  
 GGTCCACATTTAGGAAGTCTACAGTCTCGTCTACAAGGGCAGCCGATATACCATCAGATGA  
 TGAGGGTTACTCTGAGGACGATTTCTGATGACGACGGTAACTCCTCTTACACAATGGAAAACG  
 GCGGTGAAAACGATGGCGACGAAGATCTAAATGCCATTTATGGTCCCTATATTTCAAAAAC  
 CACATGCTACAAAAGATCCATTTCCATCGAGTTGGCATCTTTGAACGAATGCTGCAAGATAA

ACAACAACACGATGAGTACTGGAACACCGTCAACACTTCTATTGAAACCGTCAGCGAATTTT  
 TCGACAAATTAATCGGTTGACCTCTCAAAGGGAAAAAGAATGATTGCCCAAATGACCAAG  
 CAACGGGATGTTAACAATGTTGGATTCAATCGGTAAGATCTGGAAATGGAAGTGGTTGA  
 TAAAGACGAAAAATGGTTGCCTTGGATAAAGAACGGAAAAATCTGAAAAAATGCTTCAA  
 AAAAATTGAACAATCAACCACAGGTTGAACTGAGGCTAATGAAGAATCCGATGATGCAAAT  
 TCAATGATAAAGGATCCCAAGAATCAACAAATACCCTTGAGGAAATCGTAAAATTTATCGA  
 AGCAACAAAGGAAAGTGATGAGGATTCTGACGCCGACGAATTTTTTCGACGCAGAAGAAGCTG  
 CTTCCGACAAAAAGCCAATGATTCGGAAGACTTAACCACAAACAAGGAGACTCCAGCTAAT  
 GCGAAACCACAAGAAGAAGCTCCTGAAGACGAGAGCCTTATTGTGATCAGTTCTCCACAGGT  
 GGAAAAGAAGAACCAACTATTAAAAGAGGGATCATTTCGTCGGATATGAAGACCCAGTGAGAA  
 CCAAAGTGGCTTTAGACGAAGATAATCGTCCCAAGATTGGTCTCTGGTCTGTTTTAAAGTCT  
 ATGGTCGGTCAAGACTTAACCAAATACTCTACCGGTATCGTTCAATGAGCCAACATCCTT  
 ACTACAGAGAGTATCTGAAGATATTGAGTATTCTCATATTCTTGACCAAGCTGCCACTTTTG  
 AAGACTCCTCTTTAAGAATGCTATATGTAGCTGCCTTTACTGCATCAATGTACGCATCTACC  
 ACTAACAGAGTGTCTAAACCATTCACCCCTTACTCGGTGAACTTTTTGAATATGCCAGAAC  
 TGATGGTCAGTACCGATTCTTCACCGAACAAAGTCTCTCACCACCCACCTATCTCTGCTACTT  
 GGACAGAATCGCCCAAATGGGATTTTTTACGGTGAATGTAATGTTGATTCGTCATTCAATGGG  
 CGCACGTTCCGCGTGCAACATTTAGGATTATGGTACATTACTATCCGGCTGATCATAATAT  
 TAGTGTTCGCGAGGAACTTATTCCTGAAAAAACCAAATAACACTGTTATCGGTATTTTAA  
 TGGGAAACCACAAGTAGACAACAGTGGGGACGTCAAAGTCACAAACCATACCACAGGCGAC  
 TATTGTATGCTGCATTACAAAGCCATGGCTGGACCTCAGCCGGTGCATATGAAGTCAGAGG  
 TGAAGTATTCAACAAGGACGATAAAAAATTATGGGTTCTTGGTGGGCATTGGAATGATTCCA  
 TTTACGGGAAAAAGTAACTGCTAGAGGCGGAGAAGTACATTAGACAGAATAAAAAACGGCA  
 AATTCCTGCCACGGGAGGACCAAACTAGATGGGTCTAAGTTTCTGATATGGAAAGCAAAATGA  
 AAGGCCCTTCAGTGCCATTTAATTTAACGTCGTTTGCATTGACTTTGAATGCTTTGCCACCCC  
 ACTTGATACCATATTTAGCACCCACAGATAGTCGTTTAAAGCCCGATCAAAGGGCTATGGAA  
 AATGGTGAATACGATAAAGCTGCCGCGGAAAAGCATCGTGTGAAAGTAAACAAAGGGCAGC  
 AAAAAAGAAAGGGAACAAAAAGGAGAAGAATACAGACCTAAGTGGTTTGTCCAGGAGGAGC  
 ACCCCGTTACCAAAAGTCTATACTGGAAATTTAATGGAGAGTATTGGAACAAAAGAAAAAAT  
 CATGACTTTAAAGATTGTGCTGATATTTTCTAA

>YGL056C 1.52 Hot

ATGCCTCAAATAACAAGACACACGTCCATCGTAGAAATGCTTTCTACCCACCTCAATTACC  
 GAATTCCACAGATTTAAATAGTTTGAGCGAACAGACAGACAAGAACACTGAAGCAAACAAA  
 GCGACACAGAATCACTACATAAATCTATTTGAAATCGTCATCTTCATCTTCTCTCTCCACG  
 CTGGATAACACGGAATACTCAAACAATAATGGCAACTCCTTGTCCACCTTGAATTCACAGAA  
 TCTGTTATCTGTTTCATAGGCAGGAGTGGCAACACACTCCTCTGTCAAATTTGGTGGAAACAGA  
 ACAAATTGATTTTCATCAGAGGTTCTATTTCCGTAGAGGAAGCATTCAACACGCTGGTCAAG  
 CACCAGCTAACTCTTTGCCTGTGGAGAATTTCCGGGAGACATGAATTGTTTAAACATTTCGA  
 CTATAATGATCTCAATGCGTACCTTCTTCTTGTATTAAACAGGATCAAGGTGAGCAACGACA  
 AGATAACCTCAGACTGCCAGAATGGTAAGTCCGTGCCCGTGGCGGAGATAGTAAAGTTGACA  
 CCTAAGAATCCATTTACAAATGCCCCGAAACGGAAAACTTATCGACGGTAATAGGCATACT  
 AGGCTCAGGTGTGCATCGTGTGCCATCACGAACGTGGAAATGACACAGATTAAGGTATAC  
 TTTCCCAACGTCGATTGATTAAGTATCTGTGGGAGAATGCGAGATCATTTCCTCAACTGAAG  
 CCTCTCTTGGACTCTTCCCTGGAGGAGCTGAATATTGGTGTACTAAATGCAGCCCGTGATAA  
 ACCTACATTCAAGCAGTCACGTGTCATATCCATCCAAGGTGACGAGCATCTAATTATGGCTC  
 TGCATAAAATGTATGTCGAAAGAATCTCTTCCATTGCGGTAGTTGACCCGACGGGAAACTTG  
 ATTGGTAATATTTAGTAACAGACGTCAAACACGTCACCAGAACTTCACAATATCCTTTATT  
 ACACAATACATGTCGTCATTTTGTCTCGGTTATTTTGAATTTAAGGGGCTAGAGACCGGTA  
 AGGACTCATTTCTATTTTCCATGTGTATCCAACAAGTTCCCTGGCAAGAACGTTTGCCAAA  
 TTGGTCGCTACCAAATCTCACAGATTATGGATAGTACAACCAAATGACAATCAACCAACAGC  
 ATCTTCCGAAAAATCCTCATCTCCATCACCAAGTACTCCACCCGTAACGACATTGCCATCGC  
 TTGCGTCGTCATACCATTGCAACACGCAATCTTCCAGGATGGCCAACTCTCCTGTTCTAAAA  
 TCTTCAGATACATCAAACAATAAAATAAATGTAAATATAAATTTGAGTGGTCCCTCACCTTC  
 TCAACCACAGTCTCCATCGGCCACAATGCCACCACCTCAAAGTCCAAGTAATTGTCCCGCAT  
 CTCCAACCTCAGCACATTTTCGAAAAGGAGTATAGAACAGGTAAATTGATAGGTGTTGTGTC

TTGACTGACATATTAAGTGT TTTGGCAAGAAAACAAACGCATCATAAGGAAATTGATCCGCA  
GATGGCAAGAAAGCAAAGAGGGCATATAGGCTGA

>YBR107C 1.64 Hot

ATGCCTTATACTTGAAGTTTTTAGGAATCAGCAAGCAACTTTCCTACTGGAAAATGGTATAGC  
AAAGTTGAACCAATTGCTAAACCTGGAAGTAGATTTAGACATTCAAACCATTCGAGTACCCA  
GTGATCCTGATGGTGGTACCGCCGCTGACGAGTATATCCGTTACGAAATGAGGTTGGACATC  
TCTAATTTAGATGAGGGCACTTACTCTAAGTTCATTTTTCTTGGGGAACCAAAAATGGAGGT  
GCCGATGTTTTTGTGCTATTGCGGGACAGATAACCGCAATGAAGTGGTATTGCAGTGGCTGA  
AGGCAGAGTACGGTGTCTATTATGTGGCCGATAAAAATTTGAACAGAAGACCATGATAAAGTTA  
GCTGACGCCAGCATTTGTGCACGTAACGAAAGAGAACATCGAACAAATTACCTGGTTTTAGCTC  
AAAGTTATATTTTGAACCAGAAACACAAGACAAAAACTTGC GGCAATTCAGTATAGAAAATAC  
CGAGAGAAAGCTGTGAGGGTTTGGCTCTTGGCTATGGTAATACTATGCACCCGTATAACGAT  
GCAATTGTACCCCTACATTTATAATGAAACGGGGATGGCGGTGGAAAGATTACCGTTGACTTC  
CGTCATATTGGCAGGGCACACGAAAATAATGAGAGAATCCATTGTCACTTCAACACGAAGTC  
TCAGGAACAGAGTTCTAGCAGTTGTACTCCAATCGATTTCAGTTTACCAGCGAGTAA

>YBR264C 1.59 Hot

ATGGAAGCAACCATCAAAGTGGTACTGCTAGGAGATTCATCAGTGGGGAAAACCAGTATAGT  
GACTAGGCTCAAATCAGGTAAGTTTTCTAGCAAAACATGCGGCTACGATAGGTGCGGGCTTCA  
TCACCAAGACAATCGAGGTTCCCTTCTAACGACTCCTCTACGGAGAAACGTATCCATATGGAG  
ATATGGGACACGGCGGGTCAGGAACGGTATAAATCACTGGTGCCAATGTATTATCGAGATGC  
GAATATTGCTTTGATTGTATTGCAATTGGGAGACGTATCCAGTCTGCAATGTGCAAAGACAT  
GGTTTCAAGATTTACAGGACCGTGTCTCAGGGAACGCAGGTAATTATCGTGGGCAATAAGTAC  
GATTTAGTCTGCGAAGAGCATTTCAGGGGAAAGTACTATAACGGCGGAGTTACAGGGTCTGCC  
GTATGTGGCCGTAAGTGCAAAGACAGGGTACAATTTTCGATACATTGAATAAAAATAATAATCA  
GTTTGGTTCCCGAAAGTCAATTCAGACATTGTCAAAGAACAATGAACAGGGAAATATACTG  
GAAATAAATAAAAAAAAAAAGCGGCAGTGGCTGTATATGTTAA

>YBR230C 2.27 Hot

ATGTCCTGCAACTGCTAAACACGACAGTAACGCTAGCCCAAATTTCTGACTCTGAAGACGGTCA  
CCACCACAACAATAAGAAGGAATGCGCTATCGAATATCTGAAGGCACGGTTAAATAGTGCAT  
CAGCAGTCGCTTGGCGCTACCTCCAAGCTTTTGTTCAGTAAGACGCAAGACTTTGCCAAAGTA  
TGCTTTTTTAGAACTTCAGAATCCCCTTGTCTTGGTCAACTTGTGCTGCATTCTTCAGTGGT  
ATGTTATTTATGTAACGGGTATGCGAACCACAACGCCAGATTCTTGAAGGGGAAACCTAACT  
CTACAGTCTTAGCAACAACCGCCGCGCTCTGGGTCTTTTGACGCTGGACGGTATAATTTCA  
AAGAAATACTACTCCAGATACGACAAGAAATAA

>YOR175C 1.52 Hot

ATGTACAATCCTGTGGACGCTGTTTTTAACAAAGATAAATTACCAACTATGGGATTGATAGTTT  
TACACTGCGATATGCTATCTGCTTATTGGGATCGTTCCCACTGAATGCTATTTTGAAGAGAA  
TTCCCGAGAAGCGTATAGGTTAAAATGTTGTTTTATCATTTCTATGTCGATGTTTTACTTA  
TTCCGTGTGCTGAATCTAGTAAGTGGATTTCAGGACCCTGTTATTAGTACCATGTTTTACTTA  
CTTGATCTCAAGATTTTACCGTCCAAGTTTATGCCACACTTGAATTTTCATGTTTGTATGG  
GTCATTTGGCAATAAATCATATACACGCCCAATTCCTTAACGAACAGACTCAAACCTACCGTT  
GACATTACAAGTTCACAAATGGTTTTAGCCATGAACTAACTTCTTTTGCATGGTTCGTA  
TGATGGTTCATGCACTAGCGAAAGCGATTTCAAAGATTTGACTGAGCATCAAAAATCTCGTG  
CTGTCAGAGGTCATCCACCCTTATTAAGTTCCTGGCATATGCATTTTTCTATTCAACGTTG  
CTAACTGGCCCAAGTTTCGATTATGCCGATTTTGGACAGCTGGTTGAATTGTGAGATGTTCCG  
TGACTTGCCTGAAAGCAAAAAGCCTATGAGAAGACACCACCCTGGTGAAGAAGACAGATTTC  
CAAAGAATGGTAACTTGCATTATGGAAAGTTGTTCAAGGTCTTGCTTGGATGATTTTAAAGT  
ACACTAGGAATGAAGCACTTCCCGTAAAATACGTTTTGGACAAAGATGGCTTCCCAACGAG  
ATCTTTTATATTCAGAATCCATTACTTATTCTTGGTTCATCCATAGATTCAAGTACT  
ACGCTGCCTGGACTATTTCCGGAAGGATCTTGTATTTTGTGCGGTTTGGGTTATAATGGTTAT  
GATTCAAAGACACAAAAGATCAGATGGGATCGTGTGAGAAATATTGACATTTGGACCGTAGA  
AACGGCGCAGAATACGCGTGAAATGTTGGAAGCATGGAATATGAATACTAACAAGTGGCTAA  
AATACTCTGTTTATTTACGTGTCACAAAGAAGGGCAAAAAACCTGGTTCCGCTCAACTTTG

TTTACTTTCCTAACTTCCGCATTTTGGCATGGTACCAGACCTGGGTACTATCTGACTTTTGC  
 GACAGGGGCTTTGTACCAAACATGTGGTAAAATCTACAGACGCAATTTTAGACCAATTTTCT  
 TGCAGAGAAGATGGTGTCACTCCTTTGCCTTCTAAAAAAATCTACGATTTAGTTGGCATATAT  
 GCAATTAACACTAGCATTGGTTACATGGTGCAACCATTTATTATCCTTGATTTGAAGCCATC  
 TTTAATGGTATGGGGCTCTGTTTATTTCTATGTTTCATATTTATTGTTGCTTCTCATTTTCC  
 TATTCAGAGGACCATATGCTAAACAAGTTACTGAATTTTTTAAATCCAAACAACCTAAAGAA  
 ATATTCATTAGAAAACAAAAGAAGTTGAAAAAGATATTTCTGCAAGCTCTCCAAACTTGGG  
 TGGTATATTGAAGGCAAAGATTGAACATGAAAAGGGAAAAGACAGCAGAAGAAGAAGAAATGA  
 ACTTAGGTATTCCACCAATTGAGTTAGAAAAGTGGGACAATGCTAAGGAAGATTGGGAAGAT  
 TTCTGCAAAGATTACAAAGAATGGAGAAAATAAAAATGGTCTTGAAATAGAAGAGGAAAACCT  
 TTCTAAAGCTTTTGAAAGATTCAAGCAGGAATTTTCTAACGCTGCAAGTGGATCAGGTGAAC  
 GTGTGAGAAAAATGAGTTTTAGTGGTTACTCACCAAAGCCTATTTCAAAAAAGGAAGAGTAG

>YKL039W 1.56 Hot

ATGAGAGTATATCAGTTTTGCGGACCTTTCCAATTATTCACCTGCTTCTTATGCTACCTTCT  
 AGTGTTTCGTAAGGCTAACAAGGAAAAGATAAGTCAAAAAGAATTATCAAGTATGCGCAGGTA  
 TGTATTCCAAAGAAGATTGGAAGGGCAAATAGACCCGTTTATATCATTCATCTTAAAAAA  
 ATAAGTGGATTGAGTGATGAGTCTGATCCAGGCTTAGTTCGTTGCAATCTATGATTTCCAAGA  
 CTTTGAGCACTTAGGTGTGCAATTGCCGGATGAAGAAAATGTATTATATTTGTGATGATTATG  
 CAATTGATATCGGGATTTGTGAAGAGGAGAATCGTGATGAGTTTTATTGTTCAAGATGTTGTA  
 TATGATCCATATACTTCCACAAATAGATCTTTGGCCAATCCAATCATGACGTTTTTCTCAAAA  
 TGAGGTTCGGCCTTCATGATACTAGATACCCAATAAAAAGAAACCGGATTTTATTGTGTTACTG  
 CGTTCAGATCATCGACGTCTACCAAGTTCAACGCTGTGGTGAATTTTCAGGAATGCTTATGGT  
 CAGCTTGCGGGCACCGAGATCAACAAATTGCCACTATATGGTCTTTTGGCGGTTCGCATACGT  
 TGTGGCGATGGCGTTATATTCCTTCGCCTTCTGGAAGCACAAGCATGAATTGTTACCATTAC  
 AAAAGTATTTGCTGGCCTTTTTTGTATTTTTAACCAGCAGAAACCATATTTGTATGGGCTTAC  
 TATGATTTGAAAAATGAAAAAGGTGATACTGCGGGAATAAAAAGTTTATATGGTGTTCCTGTC  
 GATATTGACGGCTGGTAAAGTTACATTTTTTCATTTTTCTATTATTGATTATCGCTTTGGGCT  
 ACGGTATCGTGATACCCTAAGTTGAATAAAAACGTTGATGAGGCGTTGCCAAATGTATGGTGC  
 TTAACCTTATGCAATTTGCATTGGATTTTTGATCCAAAGTTATTTGACCGACATGGAGGCACC  
 ATCTCCACTAATCTTGATCACCTTGATTCCATGGCGCTTGCAATTAATCATATTTTACTACA  
 TGATTATTAGATCCATGACAAAAACAGTTATCTATTTGAAAGAGCAAAGGCAGATCGTAAAA  
 TTGAACATGTACAAGAAGCTACTATACATCATTTATGCGTCTTTTTGAGTGTACTAGCTGG  
 TAGTATAGTTTCGTCAATTTATTTACGTTGGCATGAACACTATTGATATGATTGAGAAGA  
 ACTGGAGTCAAGGTTCTTCGTTACTGATTTCTGGCCTACGTTAGTGTATTTTCATTGTTTTCGTT  
 ACCATCGCGTTCTTATGGAGACCAACAGATACTTCATACATGCTAGCCGCATCCCAACA  
 ACTACCCACAGACCCAGAAAATGTCGCGGACTTTGACTTGGGCGATTTGCAATCGTTTGCAGATC  
 AAGATGACGCAAGTATCATCACTGGTGGAGCGTGGCATAGACGAGGATGACCTCAATTTGAAT  
 TTTACTGATGATGAAGAAGGACACGATAATGTAATAACCATAGCCAAGGCCACGGGCCAGT  
 GTCTCCCTCTCCAACAAAATAA

>YHL050C 1.84 Hot

ATGGCAGACACACCCTCTGTGGCAGTACAGGCCCCACCGGGCTATGGTAAGACGGAGTTATT  
 TCATCTCCCCTTGATAGCACTGGCGTCTAAGGGCGACGTGGAATATGTGTCGTTTCTGTTT  
 TACCGTACACAGTGTGCTTGTCTAATTGCATGATCAGGTTGGGCGATGCGGTTGCTTGAAT  
 GTGGCCCCGTGAAGAACTTTATTGAAGAAGGTTGCGATGGCGTTACTGATTTATACGTGGG  
 GATCTACGATGATCTTGCTAGCACTAATTTACAGACAGGATAGCTGCGTGGGAGAATATTG  
 TTGAGTGCACCTTTAGGACCAACAACGTAATAATGGGTTACCTCATTGTAGATGAGTTGCAC  
 AACTTTGAAACGGAGGTCTACCGGCAGTCGCAATTTGGGGGCATAACTAACCTTGATTTTGA  
 CGCTTTTGAGAAAGCAATCTTTTTGAGCGGCACAGCCCCGAGGCTGTTGCTGATGCTGCGT  
 TGCAGCGTATTGGGCTTACGGGACTGGCCAAGAAGTTCGATGGACATCAACGAGCTCAAACGG  
 TCGGAAGATCTCAGCAGAGGTCTATCCAGCTATCCAACACGGATGTTTAACTAATCAAGGA  
 GAAATCCAAGGTGCCTTTAGGCACTAATGCTACTACCCTGCCAGCACCAACGTCAGGACTA  
 GTGCTACTACTACTGCCAGCATCAACGTCAGGACTAGTGCAGTACCCTGCCAGCATCAAC  
 GTCAGGACTAGTGCAGTACCCTGAAAGTACCAACTCCAACACTAATGCTACTACCCTGA  
 AAGTACCAACTCCAGCACTAATGCTACTACCCTGCTAGCACCAACTCCAGCACTAATGCTA  
 CTACCCTGAAAGTACCAACGCTAGTGCCAAGGAGGACGCCAATAAAGATGGCAATGCTGAG

GATAATAGATTCCATCCAGTCACCGACATTAACAAAGAGCCGTATAAGCGGAAAGGGAGTCA  
 AATGGTTTTGCTAGAGAGAAAAGAACTGAAAGCACAATTTCCCAATACTTCCGAGAATATGA  
 ATGTCCTTACAGTTTCTTGGATTTCCGGTCTGACGAAATTAACATCTTTTCCCTCTATGGTATT  
 GACATATACTTCTGCCAGAGGGCGTATTACACAATACGGATTATGCAAGGGCTGTCAAAA  
 GATGTTTCGAGCTCTGTGTCTGTTGGGCTGGCCAGAAAGTATCGTATCGGAGGATGGCTTGGG  
 AAGCACTAGCTGTGGAGAGAATGCTGCGAAATGACGAGGAATACAAAGAATACTTGGAAAGAC  
 ATCGAGCCATATCATGGGGACCCGTAGGGTATTTGAAATTTTTTTAGCGTAAAAAGGAGAGA  
 GATCTACTCTCAGATACAGAGAAATTATGCTTGGTACCTGGCCATTACTAGAAGAAGAGAAA  
 CAATTAGTGTATTGGATTTCGACAAGAGGCAAGCAAGGGAGCCAAGTTTTCCGCATGTCTGGA  
 AGGCAGATCAAAGAGTTGTATTATAAAGTATGGAGCAACTTGCCTGAATCGAAGACAGAGGT  
 GCTGCAGTACTTTTTGAACTGGGACGAGAAAAAGTGCCAGGAAGAATGGGAGGCAAAAGACG  
 ATACGGTCTTTGTGGAAGCGCTCGAGAAAGTTGGAGTTTTTTCAGCGTTTGCCTTCCATGACG  
 AGCGCTGGACTGCAGGGTCCGCAGTACGTCAAGCTGCAGTTTAGCAGGCATCATCGACAGTT  
 GAGGAGCAGATATGAATTAAGTCTAGGAATGCACCTGCGAGATCAGCTTGCCTGGGAGTTA  
 CCCATCTAAAGTGCCGCATTGGACGGCATTCCTGTGATGCTGATAGGGCTGTTCTACAAT  
 AAAACATTTCCGCAGAAACTGGAATATCTTTTGGAGCAGATTTCCGAGGTGTGGTTGTTACC  
 ACATTTGGCTTGATTTGGCAAACGTTGAAGTTCTCGCTGCAGATAACACGAGGGTACCCTGT  
 ACATGCTGATGGTAGCGGTTTACAAAGAGCTGGATAGCGATGATGTTCCAGACGGTAGATTT  
 GATATAATATTACTATGTAGAGATTTCGAGCAGAGAAGTTGGAGAGTGA

>YPR124W 1.55 Hot

ATGGAAGGTATGAATATGGGTAGCAGCATGAATATGGACGCCATGTCTAGTGCATCCAAGAC  
 AGTAGCATCGAGTATGGCGTCGATGAGCATGGATGCGATGTCTAGTGCCAGCAAACGATAT  
 TATCGAGCATGTCATCGATGAGCATGGAAGCGATGTCCAGTGCAGCAAACGTTGGCGTCG  
 ACTATGTCGTCAATGGCAAGTATGTCGATGGGAAGCAGTTCAATGTCAGGTATGTCTATGTC  
 GATGAGCAGTACACCAACAAGCTCCGCCAGTGCACAGACAACCTTCTGATTCTAGCATGTCAG  
 GCATGTCAGGTATGTCATCGTCTGATAACAGTAGCTCTTCAGGGATGGATATGGACATGAGT  
 ATGGGAATGAACTATTATCTGACTCCACATATAAAAACCTATCCAGTTTTGTTTACCATT  
 GCATGCAAACAATAGTGGTAAGGCTTTCCGGTATTTTCTTATTATTTGTTGTGGCTGCTTTCG  
 TCTACAAACTACTGCTTTTTCGTTAGTTGGTGCCTTGAAGTTCACTGGTTTTAAAAAATGGGAC  
 AAGCAAATAAATATTTCCACTTTACCTTCAGCAAACCTCCAAAGACGAAGGAAAACATTATGA  
 CACAGAGAATAAATTTGAAATTCAGGTTTACCTAAGCTGCCAAATTTATTAAGCGATATAT  
 TTGTTCCATCTTTAATGGATCTCTTTTCATGACATTATAAGGGCGTTCTTAGTATTTACCTCT  
 ACGATGATTATTTATATGTTGATGCTTGGCTACCATGTCTTTTGTTTTAACATACGTTTTTGC  
 TGTAACTACTGGTTAGCTTTATCGGAAGTCTTCTTCAATAGATGCAAAATAGCCATGCTAA  
 AGAGGTGGGACATCCAAAGAGAAATTCAGAAAGCGAAGAGCTGTCTGGCTTCCGGTAACTGC  
 CAATGTGGTAGACATCCCGAACCCAGCCCTGATCCAATTGCTGTTGCCGATACCCTTCCGG  
 AAGTGATCAAAGTACTCGCCTGAAAAGAACAACGAATCTAAAGTTGCGATTTCCGAAAATA  
 ATCAAAGAAAACACCTACACAAGAAGAGGGATGTAATTGTGCCACAGACTCAGGAAAGAAT  
 CAAGCAAACATAGAGCGCGACATCCTTGAGAATTCAGGTTGCAGGAACAGTCCGGGAATAT  
 GGATCAAACCTTACTTCCGGCCGAAAATTCACTCATAACTAA

>YCL031C 1.54 Hot

ATGGGTATTGAAGACATTAGCGCCATGAAGAACGGGTTTTATAGTGGTGCCGTTCAAATTACC  
 GGATCACAAGGCACTACCCAAAAGCCAGGAAGCTTCGTTGCATTTTCATGTTTGGCTAAAAGAC  
 ACCAGAGTTCAAATTCCAACGAGTCTGACTGTTTGTTTTTGGTCAACCTTCCATTATTATCT  
 AACATAGAGCACATGAAGAAATTTGTCCGGCAGCTCTGTGGGAAATACGATACAGTATCGCA  
 TGTAGAGGAACTACTATATAACGATGAATTTGGATTACATGAAGTAGATTTATCGGCATTGA  
 CCTCCGATCTGATGTCCTCCACTGACGTCAACGAGAAGAGATACACACCAAGAAACACGGCG  
 CTATTTAAAATTTGTTGATGCTGCAAGTATAAATAACTGCTGGAATGCTTTGAAAAAATACTC  
 GAATTTGCATGCCAAACATCCAAATGAACTATTTGAATGGACATATAACGACTCCATCATTCA  
 CACTTTTTGTTAACTTCTACAAACCACTGGATATTGATTATTTGAAAGAAGATATTCATACA  
 CATATGGCAATTTTGAACAGCGTGAAGCTCAAGCACAAGAGGATGTTCAAAGTTCTATAGT  
 GGATGAGGATGGATTCACATTAGTTGTAGGAAAGAACACCAAGTCATTGAATTCATAAGAA  
 AGAAAATATTAACAAAAATCCATTATCCAAACATGAAAATAAGGCCAAGCCAATTTCAAAT  
 ATAGATAAAAAGGCAAAGAAAGATTTCTATAGATTTTCAGGTCAGAGAACGTAAAAAACAGGA

GATCAATCAACTGTTAAGTAAATTTAAGGAAGATCAAGAAAGAATCAAGGTAATGAAAGCTA  
AGAGAAAATTCAATCCATACACTTAA

>YFL011W 1.58 Hot

ATGGTTAGTTCAAGTGTTCATTTTGGGGACTAGCGCCAAGGCATCCACTTCTCTAAGTAG  
AAAGGATGAAATTAACCTAACCCCTGAAACAAGGGAAGCTAGCTTGGACATTCCATACAAAC  
CCATTATTGCATACCTGGACGGTGATGGGTCTCTGTCTGATGATTGCCTTTGGTGGATTCAAT  
TTTGGTTGGGATACAGGAACCATTTTCAGGGTTTATTAACCAAACAGATTTCAAGAGAAGGTT  
TGGTGAGTTACAAAGGGACGGCAGTTTTCAACTATCAGATGTCAGGACAGGGCTAATTGTCTG  
GTATCTTCAACATAGGTTGTGCTTTAGGTGGCCTAACGCTGGGACGCCTGGGCGATATTTAT  
GGGCGTAAATCGGCTTAATGTGTGTTATACTGGTGTATGTTGTTGGTATCGTGATCCAGAT  
TGCTTCCTCTGACAAATGGTATCAATATTTTATTGGTAGAATTGTTTCTGGAATGGGTGTTG  
GAGGTGTTGCTGTGCTGTGCGCAACTTTGATCTCAGAAATTTCCCAAAGCACCTAAGAGGC  
ACTTGTGTCTCTTTTTACCAGCTAATGATTACCCTTGGAAATTTTCTTGGGCTACTGTACCAA  
TTATGGTACAAAGAAATATTCAAATTCAAATACAGTGGCGGGTTCCCTTGGGTTTGTGTTTTG  
CGTGGGCAATCTTTATGGTGAATGGAAATGGTTATGGTTCCGGAATCGCCCAGATATTTAGTA  
GAAAAAGGTAAGTATGAAGAAGCTAGAAGGTCTTTGGCCAAATCAAACAAGGTCACAGTTAC  
TGATCCAGGCGTTGTTTTTGGAGTTTGATACTATAGTTGCAAATATGGAAATAGAAAGGGCTG  
TTGGAAATGCCAGTTGGCAGCAACTCTTCTCAAATAAAGGAGCAATTTCTACCAAGGGTAATA  
ATGGGAATCGTTATCCAGTCACTGCAACAGCTTACTGGCTGTAATTATTTTTTCTACTACGG  
CACGACCATTTTCAATGCTGTTGGAATGCAAGACTCTTTTCGAGACTTCCATTGTCTTGGGG  
CTGTTAATTTTGGCTTCTACATTTGTTGCACTATACATTGTGGATAAAATTTGGGCGTCGAAAA  
TGTTTTATTGTGGGGTCTGCCTCGATGGCAATTTGTTTCGTCAATTTCCGCCACCGTTGGCGT  
CACTAGATTATGGCCACAAGGGAAAGACCAACCTTCTTCGCAAAGTGCTGGTAATGTTATGA  
TCGTTTTTACTTGTCTTCTCATTTTTCTCTTTTGCCATTACTTGGGCTCCTATCGCCTATGTC  
ATTGTGGCAGAACTTATCCATTAAGAGTTAAAAATCGTGCCATGGCCATTGCGGTTGGTGC  
GAACTGGATGTGGGGTTTTCTTGATTGGATTTTTTCACACCCTTTATCACTAGATCCATAGGAT  
TTTTCTTATGGCTATGTTTTTCATGGGTTGCTTAATCTTTTTCGTACTTCTACGTTTTTCTCTTT  
GTTTGCAAACAAAGGGATTAACCTCTGGAGGAAGTTAATGAAATGTACGAAGAAAGAAATAAA  
GCCATGGAAGTCCGGAGGTTGGATTCCCAGTCTAGAAGAACCACAACCAACAAGCAGTA  
CACCATTAGTTATTGTTGATAGTAAATAA

>YDR382W 1.62 Hot

ATGAAATACTTAGCTGCTTACTTATTATTGGTTCAAGGTGGTAACGCTGCCCATCCGCCGC  
TGACATCAAGGCCGTCGTCGAATCTGTGCGGTGCTGAAGTCGATGAAGCCAGAATCAACGAAT  
TGTTGTCTCTTTGGAAGGTAAGGGCTCTTTGGAAGAAATCATCGCTGAAGGTCAAAGAAG  
TTCGCTACTGTTCCAAGTGGTGGTCTTCTCTGCTGCTGCCGGTGCTGCCGGTGCTGCTGC  
CGGTGGTGTGCTGCTGAAGAAGAAAAGGAAGAAGAAGCTAAGGAAGAATCTGATGATGACA  
TGGTTTTTGGTTTATTTCGATTAA

>YLR081W 1.61 Hot

ATGGCAGTTGAGGAGAACAATATGCCTGTTGTTTTCACAGCAACCCCAAGCTGGTGAAGACGT  
GATCTCTTCACTCAGTAAAGATTCCCATTTAAGCGCACAACTCAAAGTATTCTAATGATG  
AATTGAAAGCCGGTGAGTCAGGGTCTGAAGGCTCCCAAAGTGTTCCTATAGAGATAACCAAG  
AAGCCATGTCTGAATATGTTACCGTTTTCTTGCTTTGTTGTGTGTTGCCTTCGGCGGCTT  
CATGTTTGGCTGGGATACCGGTACTATTTCTGGGTTTTGTTGTCCAAACAGACTTTTTTGAGAA  
GGTTTGGTATGAAACATAAGGATGGTACCCACTATTTGTCAAACGTCAGAACAGGTTAATC  
GTCGCCATTTTCAATATTGGCTGTGCCTTTGGTGGTATTATACTTTCCAAAGGTGGAGATAT  
GTATGGCCGTA AAAAGGGTCTTTTCGATTGTCTGCTCTCGGTTTATATAGTTGGTATTATCATTC  
AAATGCTCTATCAACAAGTGGTACCAATATTTTATTGGTAGAATCATATCTGGTTTGGGT  
GTCGGCGGCATCGCCGCTTATGTCCTATGTTGATCTCTGAAATTGCTCAAAGCACTTGAG  
AGGCACACTAGTTTCTTGTATCAGCTGATGATTACTGCAGGTATCTTTTTGGGCTACTGTA  
CTAATTACGGTACAAAGAGCTATTCGAACTCAGTTCAATGGAGAGTTCCATTAGGGCTATGT  
TTCGCTTGGTCATTATTTATGATTGGCGCTTTGACGTTAGTTCCCTGAATCCCACGTTATTT  
ATGTGAGGTGAATAAGGTAGAAGACGCCAAGCGTTCATTGCTAAGTCTAACAAGGTGTCAC  
CAGAGGATCCTGCCGTCAGGCAGAGTTAGATCTGATCATGGCCGGTATAGAAGCTGAAAAA  
CTGGCTGGCAATGCGTCTTGGGGGAATTATTTTCCACCAAGACCAAAGTATTTCAACGTTT



GTTGATGGGTGTGTTTGTTCAAATGTTCCAACAATTAACCGGTAACAATTATTTTTTCTACT  
 ACGGTACCGTTATTTTCAAGTCAGTTGGCTGGATGATTCCTTTGAAACATCCATTGTCATT  
 GGTGTAGTCAACTTTGCCTCCACTTTCTTTAGTTTGTGGACTGTCGAAAACCTGGGACATCG  
 TAAATGTTTACTTTTGGGCGCTGCCACTATGATGGCTTGTATGGTCATCTACGCCTCTGTTG  
 GTGTTACTAGATTATATCCTCACGGTAAAAGCCAGCCATCTTCTAAAGGTGCCGGTAACTGT  
 ATGATTGTCTTTACCTGTTTTTATATTTTCTGTTATGCCACAACCTGGGCGCCAGTTGCCCTG  
 GGTCAACACAGCAGAATCATTCCCCTGAGAGTCAAGTCGAAATGTATGGCGTTGGCCTCTG  
 CTTCCAATTGGGTATGGGGTCTTGATTGCATTTTTTACCCCATTCATCACATCTGCCATT  
 AACTTCTACTACGGTTATGTCTTCATGGGCTGTTTGGTTGCCATGTTTTTTTATGTCTTTTT  
 CTTTGTCCAGAACTAAAGGCCTATCGTTAGAAGAAATCAAGAATTATGGGAAGAAGGTG  
 TTTTACCTTGAAATCTGAAGGCTGGATTCCCTTCATCCAGAAGAGGTAATAATTACGATTTA  
 GAGGATTTACAACATGACGACAAACCGTGGTACAAGGCCATGCTAGAATAA

>YMR244C-A 2.18 Hot

ATGGGCTTATTTTCATTTGATGGTGGCAAAAAGGAATCACAAACCCCTAATACCCGTTCCACA  
 GAGAAAGTTGTGCTGGGAGTCCAGGGACGCATTCCTCCAGTGTGGACAAGGCAGACATCT  
 TGGACGCAATGGACCCCAAGAATAGCAAGAGTATAAAGTCGCACTGCAAGGTGGAATAATGAA  
 AAATTTGAGGAGAATTGCGCCATAGCTGGATCAAGTACTTCAAGGAGAAGAGGGTCAATCGA  
 CTTTAAGAGAGAGCAGACCATCAAGAGAATCGAGCAGGAAGCTAAACAGAGGGAACGAAATC  
 AGTGA

>YJL027C 2.08 Hot

ATGATGGTAACGCGCAAACACTACCGCTATATATACCTACAAAACCTCTCATTCTCTCATTTT  
 CTGCTTCGTTTCATTTTCGAGTTTCCAAGGGTATGGTACGGTGCTATCTGCCCGTGCTTCCCT  
 CCTTTGCTTTGCTAAGAAAAATTTTCTTTTGTGTCAGCAGCAACAACACGCTACGCTCTGCGCT  
 GTGCTACGAAGTGGTCTCTGTGGCAACGGGGACATTGTACCCATGCCCGCTCGCAGGGAGGT  
 CTGGGTGTGGGGCGTGTGCGACCTCGTTGCCATGGCGATCGCGCGTGGGTGTGGTCTTTCCC  
 CAAACGGTTGCCCGTTGCTCCGGATTTTCGCATAGTTGTGCGGTAAACAAAAAACACGAGAGA  
 GGGCGGACGGCGCTGAATAGTGAAGATCGCGCGATGTCAAGTAA

>YDR044W 1.59 Hot

ATGCCTGCCCTCAAGATCCAAGGAATCTTCCAATTAGACAACAAATGGAAGCTCTTATCCG  
 TCGCAAACAAGCTGAAATCACGCAAGGTTTGAATCCATCGATACTGTTAAGTTCCACGCTG  
 ATACTTGGACCCGTGGTAACGATGGTGGTGGTACCTCTATGGTTATCCAAGACGGTACA  
 ACTTTCGAAAAAGTGGTGTAAATGTCTCCGTTGTTTATGGTCAATTGAGCCCAGCGGCCGT  
 TTCAGCCATGAAAGCTGATCATAAGAATCTGCGTCTACCAGAAGATCCAAAGACTGGTTTGC  
 CAGTTACCGACGGTGTCAAGTTCCTTCGTTTGTGGTTTAAAGTATGGTCAATTCATCCCGTTAAC  
 CCACACGCTCCAACCACGCACTTAAACTACCGTTACTTCGAAACTTGAACCAAGATGGGAC  
 CCCACAAACTTGGTGGTTTGGTGGTGGTGTGATTTGACACCTTCTTACTTATAACGAAGAAG  
 ACGGTCAATTATTCACCAACTGCACAAGGATGCCTTGGACAAGCACGACACTGCTTTGTAC  
 CCACGTTTCAAGAAATGGTGTGATGAGTACTTCTACATTACCCACCGTAAGGAAACACGTTG  
 TATTGGTGGTATATCTTTGACGATTATGATGAACGTGACCCACAAGAAATATTGAAGATGG  
 TTGAAGACTGTTTCGATGCTTCTTGGCATCTACTTGACTATCGTCAAGAGAAGAAAAGAT  
 ATGCCATATACAAAGGAAGAACAACAATGGCAGGCCATTAGACGTGGTAGATACGTTGAATT  
 CAATTTAATCTACGATAGAGGTACCCAATTCGGTTTGAAGAACCCAGGCTCTAGAGTTGAGT  
 CAATTTTATGATGAGTTTGCCTGAACATGCTTCATGGTTATACAACCACCACCCTGCTCCTGGT  
 TCCAGAGAAGCTAAATTACTAGAAGTTACCACCAACCAAGAGAGTGGGTTAAATAA

>YPL067C 1.79 Hot

ATGCAACAAGATATCGTCAACGATCACCAGGAGGAGGCCCAAGGGTGGAAAGTGGGAACAAAT  
 CAAAGAGATAATTGAATCGGGGAGCTTGCCCGTTTGAAACGAAGTCGCCAGATGACTGACA  
 AATACCACGAGCATAAGAAAAGGACTGCTGGCCTGGACATGAACCAGTACGTTTTGCAAAAA  
 CTAGGCTGGTCGCTAGACGAACCGCAGCTCGAAAATGCTGCCGCGAAGGCTTTTAGTCTTC  
 TACTCTATATGCTGTGCGTGCCAACGATTTCCCGTATAACTTCGAGCCTGGTGTGTACACC  
 TTGTTCTCTGGTCCAAGGTTGCCCTGCCAGTACATTTCCCGATAAGGCCGTCGCGAAGCG  
 GCCCGCGCTCGCATGAATGCATTTTTGACGGCACAGCCGCTACTGCGTCCACTTCTAAGCTC  
 GGGTCACGTGGCCTGGTTTGTCAACTACCCGGAACACAAAGTGTGGCCCGATTTTCCACG

CTCACGTGCTGCTTTTCTTCCACGGGAACGCTATTCCGCGGAACAGGTAAAAACGACCGTT  
GATGATATCCTTTCACACGGTTTCGAGCCACTTGCCTGA

>YBL032W 1.85 Hot

ATGTCACAGTTCTTCGAAGCTGCTACTCCCCTTGC AATTCCACAAAACAATACCAACGGCGG  
CTCCAGTGATGCCGGCAGCGCCGCCACTGGCGGGCGCCCCGTTGTTGGCACCACCGCTCAAC  
CCACCATCAATCACAGGCTTTTGTGTCATTGAAAGAGGCTGCCAAGATCATTGGCACTAAG  
GGCTCCACCATCTCACGCATAAGAGCTGCAAACGCCGTCAAGATCGGTATTTCTGAAAAGGT  
GCCCGGTTGCTCTGACAGGATCCTGTCTGTGCTGGGAACGTAATCAATGTGGCCAATGCCA  
TTGGTGATATTGTTGACGTGCTTAACAAACGGAATCCCGAAAATGAGGACGCAGCTGAGGGC  
GAAGCGGAAGAGCACTACTACTTCCACTTTTTGAAACCATATTTTACCAGCTCCCTCAAAGGA  
CGAGATCAGAGATCTGCAGCAACTGGAGGACATCGGTTATGTGAGGCTCATTGTGGCCAATT  
CCCATATCTCATCGATTATCGGGAAAGCAGGCGCCACCATCAAGTCCCTGATCAATAAGCAC  
GGCGTTAAGATCGTGGCTTCCAAGGACTTCTTACCTGCTAGCGACGAGAGAATTATCGAGAT  
CCAGGGTTTCCCAGGATCCATACCAATGTACTTATCGAAAATTAGCGAGATCATCTTGAGTG  
ACGTTGACGTCAGATTCAGCACAGAAAGATCTTATTTCCCTCATCTGAAAAAGTCTCCGGT  
GAGCCAACCTCCCTTCTACCTCATCTAACACTAGGATCGAATTGAAGATTCAGAACTGTA  
TGTAGGCGCCATTATTGGCCGTGGAATGAACAGAATTAAGAATTTGAAAACCTTTCACAAAA  
CCAATATTGTCGTGGAAGGAAGGATGACGATGATAAAGACGAAAATTTTAGAAAATTCATA  
ATCACAAGTAAATTTCCTAAGAATGTCAAACCTTGCTGAGTCCATGCTTTTGAAGAACCCTGAA  
TACTGAAATTGAGAAACGTGAAAACCTACAAGAGAAAATTTGGAAGCTGCCGAAGGAGATGCCA  
CTGTTGTTACTGAACGCTCTGATTCTGCTTCTTTCTTGGAAAGAGAAGGAAGAACCCTCAAGAG  
AATCATGATAACAAAGAGGAGCAGTCGTAG

>YCL034W 1.92 Hot

ATGGGGTTTTCTTTCGGATCATCCGCATACAGCTATCACCGAGACGATCTTTCGAATTGTCTC  
TTCAAGGGACTATACGCTAGAAGTGGAGTTAGCTCCCTTGATTCAGCTTATCAAAGCAGATC  
ACAACGATTATAACTATAACCGTGAACCAAGAAGAAGCTGCGCGAGCACTTAGAAAAGAAAATA  
AAGTATGGGAACCGGCTGCAGCAGTCCAGGACTCTGGACCTCTTGGATCTGTTTCATCTCACA  
AGGCGTGAAGTTTACAGTCATGTACAATGATGACAAGCTGCTGCAAAGGCTGAGAGGGATGG  
CTACGAACCTGAAAACAGCGGGTCCGGTGAAAAGTATGAGCCTAGGATTATTAAGAAGTGC  
GCGGCGTATGCTATCTCGTGGCTAAACTATATTACGCAGAACAACCTTGAGAATGCGAGGGC  
GTATTCAGGTCTTTATCAATTGGGTCAAACAGTCAAACAGAGGTA CTGAAAGAGCAGCCGTT  
CCCGCCGTAGCGGCGGAGGCTCTGGCGGACGGTCTAACTTCATGGATGATAGCGCCGACGAC  
ACTTTGTACCAGTCCAACCTCGCTGACTAGTGCCGATAGATTGTATAGGATTCACACAGATCAA  
CATGAACAAAGAGGCACCCAGGATTCGGCTCATAATCAGCGATGCTCTCGCGTCTGCTGTGT  
CGTTACAGAACTCGCTGATCGGGCTGCCAAGGGCAAGTTCTCCACAGACGATGAAGAGGCC  
ACGTCCAAGTTCAATCCAGGCAAGGGCGATCAGAAGGAAAGTTCTTAGATATCTGCAATTGGT  
CACGGAGGGTGAGTTTCTGGGTAGCTTAATTCATGCCAATGATGAACTGGTGGCTGCGTTGA  
CTGCATACGACGACCGAAGCGCTCAGGACGATAGCAGCGATGAAAGTGATCACGGCTCGTAC  
GATGACGGTATTTATGATGAAAACGAGCAGGATAACAGCAGGTATATTGATAGCGAGTCCCTC  
AGAGGAAGAGAGCTTGTCTTCTTATCAGCCGTCCACGATCTCAAACCCTTTCGGTGATCATA  
ACAAAATTTGA

>YLR099C 1.54 Hot

ATGTGGACAAACACTTTCAAATGGTGCAGCAAACTGAGAAGGAGACCCTACTGCAGACGC  
CAAGGTGTGTGCTAGCGTGCAGGGCCCTGAAGGCCCTGCAGCAGCAAATTATGGATAGCACCA  
CTGTGCGTGGGTCCGTTAATAACACGATGACTCCAGGCGGGATTAACCAGTGGCATTTCAC  
AATAAGCGTGCGAACAAAGTGTGCACGCCTACAGTACTAATCCATGGATACGCTGCCTCGTC  
GATGGCGTTCTACAGGACGTTTGAAGACCTGTCAGACAACATTAAGATCTATATGCCATCG  
ACTTGCCAGCCAATGGTGCCTCAGAGGCGCCAGCATTGCAAGTGAACAAAACCAAGAAGATC  
AAGTCTCTCAGGTTTAAGCATATAGAAGATGACGTAGTAATCCCTGTGATAGAGAAGCGCCC  
CCCAGCAGAGGACATCAAGTCACACCTGGAGCAGTACGAAAGCTACTTCGTAGACAGGATAG  
AGCAATGGCGGAAGGATAACAAGCTTCGAAAATAAACGTGGTGGGCCATTCATTCCGGAGGA  
TATATTTTCAATCAAATACGCCCTCAAGTACCCGATTCCATTGAGAAACTGTGTCTCATATC  
TCTCTTGGTGTGGAAAACAGTATACATGCTATCACCCACAAATGGGAGCCCAACACCACCT  
ATCCACTTACGTTTACCGACCCATCGTCCCAGATATTATACAAGAAAGCTGAACGTACCGCGG

TTTATCTTTGAAAACCAGCTAAACGTTTTTGAAGTGGATGGGACCCATAGGCTCCAAATTGTG  
 CTCGAACTACATCTCCACCGCATAACGTAAGTTCCGGATCAGATATATAAGGACTATCTTT  
 TGCACCTCATTTGTCGGGAAGAACCAGACGGTGCAACCACAGACAATCAAGGTGTTCACCCAT  
 TTGTTTGAAGGAATCTGATCGCTAGAGATCCGATAATAACAACGTTCTGTTTTTTGAACCC  
 AGCAACGCCTGTATGTTTATGATGCGGAGCAGGATTGGATGGATAAAATATGCGGGCTACT  
 TGACTACTGAATCAATGCTAAAAACAAGGCAAAGGCTAGCTACGTTGAAGTCCCTGATGCT  
 GGCCATAATCTTTTCTGGACAACCCGACGACTTTGCTCTTCTTTAGTCTCGTTCTCTGT  
 AAAGTAA

>YGL162W 2.17 Hot

ATGTCACAAGCATTACAGTAAGAAATAGAGATCGATCGCTACCACCGCTATTGCTCCCAA  
 TGTTTTCCCTGCTAGAAAAAGATATACGGCGTAAAGGCACCCAAAATGTGGGCATCACCGATC  
 CAGAACTCTTGTGCGACCACTTGGACGAGGAAGCGGGCTTTTCCGACTGACGAGCTTTTAGGA  
 GGCTATAAGAGATTAAGCCTGCTGCCGCTGACAGTAATGAGTGCCTATTGGTATTGCCAC  
 GGTGACGCCGCCCAACGCTCCCCGTAAGTGCATTGTTCCCCCTCCACAAAATTACACTC  
 CACCATTGTTTGGATATCATCCTCATGCTCTTGCTTCCATGGTCAATGAAGACGCTAATGCG  
 TCATGCACTCAAATGTCTATAATTTGCGCTCAACGAGCAACTCGACAACCTCCTCTGCCAC  
 ATCTACTAGTTCAATTTCCAAGAGACAAAGAAGTGGCCCAAGTTGTGACAAATGTCGTTTGA  
 AAAAAATAAAATGTAATGCGAAAATTGAGATTTTGCTTCAAGACGATACTATAATGCCAATG  
 ATCTCGAACAAGTTGCGGTACGTCTTACTCCTGACGATATTCGGCTATATCGAGGCACGCT  
 GTTGCAGGAATATTGCCATACCGGATGATGTCATTGAGGGTACAGGCTCACGCAAGTTGATTA  
 AGCATATTGATAAGTTGGTTTTGCTCACACCTTGTTTTACCATGCATTAAGAAAAAGCATTCT  
 TCTTCTTCCACTAATTTCCCAAAAAATGATAAATGTAATTTTTCAAAAGGCTTTACCAGAGC  
 TGACATAAACATTTTATCCAAAATCTCCTTAAAATTTAAGGATAAAAACCATTTACGACATAA  
 CCTATGATGACTATAAAAAGCATTGATTTTTAG

>YIL101C 1.8 Hot

ATGAAATATCCCGCTTTTAGCATTAACAGTGACACGGTACACTTAACGGACAACCCCCCTGGA  
 CGACTATCAGCGTCTTACCTCGTCAGCGTACTGGATAGGGACTCGCCCGCGCCAGTTTCA  
 GCGCCGACTCAATATTAGAAAGGTTAACTATAAATCCTCCATTGCTGCGCAGTTACACAT  
 CCAAACCTTATTATCAGTGCTCGGGACGCAGGGAACGGGGAAGAGGGCGGCGCAGAACGT  
 TCTGAACTGCTTCGAGTACCAGTTTCCCAACCTACAACAATTCAGAGCCTAGTCCACGAAC  
 AAACGTTGCTATCGCAGCTCGCTAGCTCCGCCACTCCTCACTCCGCCTTGCTCTGCACGAT  
 AAAAAATTTCTGATGGGTAAAGATCATACTACCTTCCCGGTCTAACAAAACACCAGTCTCAGC  
 ATCACCCACCAAGCAAGAAAAGAAGGCTCTGTCAACAGCATCGCGTGAAAATGCCACCTCCT  
 CGCTGACAAAGAATCAGCAGTTCAAGTTGACCAAAATGGACCATAATCTGATCAATGACAAG  
 CTCATCAACCCTAACAACTGCGTAATATGGTCGCATGACTCCGGCTATGTGTTTATGACGGG  
 CATCTGGCGGCTGTATCAGGATGTTATGAAGGGCTTATAAACTTGCCAGAGGTGACAGCG  
 TTTCCACTAGCCAACAGCAGTCTTTTTGCAAGGCTGAATTCGAGAAAATCTATCTTTTTGC  
 TTTTACAATCACAGTTCGTTCACTTCTGAGGAATCTTCAAGCGTACTGTTGTGCTCCTCCAC  
 CTCTTCCCGCCAAAGAGACGGACATCCACAGGGTCTACCTTCTTGGACGCCAATGCGTCTT  
 CTTTCACTACTTCTTCAACGCAGGCAACAATTACATCGATTTTTCATTGGAACAACATCAAG  
 CCCGAACCTGCGGGACCTTATTTGCCAGTCTTACAAGACTTCCTGATCAATGAACTTGGTCC  
 TGACCAAAATAGACTTGCCCAACTTAAATCCGGCAAATTTTACGAAAAGAATAAGAGGTGGTT  
 ACATCAAATTCAGGGTACTTGGTTGCCGATGGAATCTCAAGGTTGCTATGCCTGCGGTTT  
 TGTTTTCCGATCAGATACTTTCTGGTGCCTATTTTTGGTCCAGATTTCCCAAAGATTGCGA  
 ATCGTGGTATTTGGCTCATCAAACGTTACATTTGCTAGTTCTACCACTGGTGCAGGTGCTG  
 CTACTGCTGCTACTGCTGCTAATAACAAGTACCAATTTTACGTCTACTGCAGTGGCAAGA  
 CCTAGGCAGAAGCCAGACCCAGGCCAAGACAAAGATCTACTTCCATGTCCCATTCCAAAGC  
 GCAGAACTTGTATTGAGGACGCCCTTGCCCTCATTGACTCATTGTAGAAAATTTGGGCC  
 TTTCTCAAATGACAAGAACTTCATTAACAAAAACAGCAAAAGGCAAAAGTCGTCCACATAC  
 ACCTCTCAAACCTCTTCTCCAATAGGGCCAAGAGATCCAACGGTGCAAAATTTTGTCAAACCT  
 AGCATCCTTCTACAACACCCACGGTCACCGGTATTCATATCCGGGAAATATCTATATAACCAC  
 AGCAAAGATACTCTTTACCCCCACCAACCAGCTCTCGTCGCCACAGCGGCAGCTAAACTAT  
 ACTTACGACCACATTCACCCAGTTCCTTCTCAGTACCAGTCTCCAAGACACTACAACGTCCC  
 CTCTTACCAATCGCGCCTGCTCCTCCCCTTCCCTCAACCTTATGGTGATGATCACTATC  
 ATTTTTTGAATATGCTAGCGAAGTTTATAAGCAACAAAACCAACGACCAGCTCATAATACA

AATACCAATATGGACACCTCTTTTTTCGCCAAGGGCGAACAATTCACCTGAACAATTTCAAATT  
TAAAACAAACTCAAACAATAA

>YLR081W 1.61 Hot

ATGGCAGTTGAGGAGAACAATATGCCTGTTGTTTCACAGCAACCCCAAGCTGGTGAAGACGT  
GATCTCTTCACTCAGTAAAGATTCCCATTTAAGCGCACAATCTCAAAAGTATTCTAATGATG  
AATTGAAAGCCGGTGAGTCAGGGTCTGAAGGCTCCCAAAGTGTTCTATAGAGATACCCAAG  
AAGCCCATGTCTGAATATGTTACCGTTTTCTTGCTTTGTTGTGTGTTGCCTTCGGCGGCTT  
CATGTTTGGCTGGGATACCGGTACTATTTCTGGGTTTGTGTCCAAACAGACTTTTTTGAGAA  
GGTTTGGTATGAAACATAAGGATGGTACCCACTATTTGTCAAACGTCAGAACAGGTTTAATC  
GTCGCCATTTTCAATATTGGCTGTGCCTTTGGTGGTATTATACTTTCCAAAGGTGGAGATAT  
GTATGGCCGTA AAAAGGGTCTTTTCGATTGTCTGCTCGGTTTATATAGTTGGTATTATCATT  
AAATTGCCTCTATCAACAAGTGGTACCAATATTTTATTGGTAGAATCATATCTGGTTTGGGT  
GTCGGCGGCATCGCCGTCTTATGTCTTATGTTGATCTCTGAAATTGCTCCAAAGCACTTGAG  
AGGCACACTAGTTTCTTGTATCAGCTGATGATTACTGCAGGTATCTTTTTGGGCTACTGTA  
CTAATTACGGTACAAAGAGCTATTCGAACTCAGTTCAATGGAGAGTTCCATTAGGGCTATGT  
TTCGCTTGGTCAATTATTTATGATTGGCGCTTTGACGTTAGTTCCTGAATCCCCACGTTATTT  
ATGTGAGGTGAATAAGGTAGAAGACGCCAAGCGTTCCATTGCTAAGTCTAACAAGGTGTCAC  
CAGAGGATCCTGCCGTCCAGGCAGAGTTAGATCTGATCATGGCCGGTATAGAAGCTGAAAAA  
CTGGCTGGCAATGCGTCTTGGGGGAATTATTTTCCACCAAGACCAAAGTATTTCAACGTTT  
GTTGATGGGTGTGTTTGTTCAAATGTTCCAACAATTAACCGGTAACAATTATTTTTTCTACT  
ACGGTACCGTTATTTTTCAAGTCAGTTGGCCTGGATGATTCCTTTTGAAACATCCATTGTCATT  
GGTGTAGTCAACTTTGCCTCCACTTTCTTTAGTTTTGTGGACTGTCGAAAACCTTGGGACATCG  
TAAATGTTTACTTTTGGGCGCTGCCACTATGATGGCTTGTATGGTCATCTACGCCTCTGTTG  
GTGTTACTAGATTATATCCTCACGGTAAAAGCCAGCCATCTTCTAAAGGTGCCGGTAACTGT  
ATGATTGTCTTTACCTGTTTTTATATTTTCTGTTATGCCACAACCTGGGCGCCAGTTGCCTG  
GGTCATCACAGCAGAATCATTTCCACTGAGAGTCAAGTCGAAATGTATGGCGTTGGCCTCTG  
CTTCCAATTGGGTATGGGGTTCTTGATTGCATTTTTTACCCTTTCATCACATCTGCCATT  
AACTTCTACTACGGTTATGTCTTCATGGGCTGTTTTGGTTGCCATGTTTTTTTATGTCTTTTT  
CTTTGTTCCAGAACTAAAGGCCTATCGTTAGAAGAAATCAAGAATTATGGGAAGAAGGTG  
TTTTACCTTGAAATCTGAAGGCTGGATTCCCTTCATCCAGAAGAGGTAATAATTACGATTTA  
GAGGATTTACAACATGACGACAAACCGTGGTACAAGGCCATGCTAGAATAA

>YOL052C 2.29 Hot

ATGACTGTCACCATAAAAAGAAATGACTAACCACAACACTACATTGACCACGAACTATCAGCCAC  
TTTAGACTCAACGGATGCGTTTCGAGGGTCCCGAGAAGTTGCTGGAAATCTGGTTCTTCCCTC  
ACAAGAAGTCCATCACGACCGAAAAGACATTAAGAAATATTGGCATGGATAGATGGATCGAG  
ATTTTGAAATTAGTGAATGCGAAGTTCTTTCCATGAAGAAGACTAAAGAAGTGGATGCCTT  
TTTGTGAGTGAGTCTTCCCTCTTCGTCTTCGATCACAAATTGACGATGAAGACGTGCGGTA  
CTACAACCACATGTTCTGTCTCGAAAAGCTTTTCCAGATCGTTGAGCAAGAGTTATCGTGG  
GCTTTCCGCACAACACAAGGGGGCAAGTACAAACATTTAAAGTGTTTTATTCTAGACGATG  
TTTCTTTTTCCCCTGTAAGCAAGCCGCTATCCATCAAAACTGGGCTGACGAAGTCGACTATT  
TGAACAAATTTTTTCGACAATGGTAAAAGTTATTCCTGGGAAGAAATGACAAGCAACCAC  
TGGAACCTGTACGTCACCGAGACGGACCGCTCCACACCTAAGGGAAAGGAGTACATCGAGGA  
TGACGACGAAACTTTCGAAGTACTGATGACGGAGCTGGACCCAGAATGCGCTAGTAAGTTTG  
TTTGGCGGCTGAGGCATCCACAACCGCTCTCGTGGAGCCAAACGAAGATAAGGGCCACAAC  
CTCGGCTACCAAATGACTAAAAATACAAGGCTTGACGAAATATATGTCAACTCGGCCCAAGA  
CTCCGATTTATCATTTACCACGATGCATTTGCGTTTACGCCATGTGGATACTCATCCAATA  
TGATTCTCGCTGAAAATACTATTACACCCTGCACGTGACTCCGGAAAAGGGTTGGTCTTAC  
GCCTCTTTCGAAAGTAACATAACCGTATTTGACATTTCCAAGGGAAAGCAAGACAACCTGGA  
CGTCTTCTACATATTCTGAACGTTTTTCAACCAAGAGAGTTCTCGATGACCTTTTTTACCA  
AAAATTATCAGAACCAATCCTTCCAAAACACTAAGCATCAACGAGTCACTGCCCGACTAC  
ATCAAGTTAGACAAAATTGTTTATGATCTGGACGACTACCACCTTTTCTATATGAAATGCA  
GAAGAAAATATGA

>YPL037C 1.82 Hot

ATGCCAATTGACCAAGAAAAATTAGCTAAGCTACAAAAGTTGTCTGCTAACAAACAAAGTTGG  
 TGGTACTAGAAGAAAGCTTAAACAAGAAGGCAGGCTCTTCTGCCGGTGCCAACAAGGATGACA  
 CCAAGTTGCAAAGTCAATTAGCTAAGTTGCACGCTGTCACCATTGACAACGTCGCCGAAGCC  
 AACTTTTTCAAGGACGACGGTAAGGTCATGCACTTCAACAAGGTCGGTGTCCAAGTTGCTGC  
 TCAACACAACACTTCTGTATTCTACGGTCTACCACAGGAAAAGAAGCTTGAAGATTTGTTCC  
 CAGGTATTATCTCTCAATTGGGCCCTGAAGCCATCCAAGCCTTGTCTCAATTGGCTGCCCAA  
 ATGGAAAAGCACGAAGCCAAGGCTCCAGCTGATGCTGAAAAGAAGGATGAAGCTATTCCAGA  
 GTTAGTTGAAGGTCAAACTTTTGATGCTGACGTCGAATAA

>YER034W 1.5 Hot

ATGGATGCATTCAGCTTAAAGAAGGATAATCGAAAAAATTTCAAGATAAACAGAAATTGAA  
 AAGAAAACATGCCACACCCAGTGATAGAAAAGTACCGGCTATTGAACCGCCAAAAGAGAGA  
 AAGCTACCACAGAGGAGAAAGATCAAGACCAAGAACAGCCCGCCCTGAAGTCAAACGAGGAC  
 AGGTACTATGAGGACCCGGTACTCGAGGACCCGCATTCTGCAGTCGCCAATGCAGAGTTGAA  
 CAAGGTGCTAAAAGACGTCCTCAAAAATCGGCTCCAGCAGAACGACGACGCCACAGCCGTCA  
 ATAATGTTGCTAATAAAGATACTTTGAAAATCAAAGACCTCAAGCAGATGAATACGGATGAG  
 CTCAATCGTTGGCTCGGACGGCAGAATACAACATCGGCTATAACAGCGGCTGAGCCCGAATC  
 ATTAGTCGTTCCCATTCACGTACAAGGTGATCATGATCGTGCGGGCAAGAAGATCAGTGCCC  
 CTTTCGACCGATCTACCGGAAGAAGCTAGAGACCGATCAGGATTTCTTGGATGGACTGCTCTAA

>YJL101C 1.98 Hot

ATGGGACTCTTAGCTTTGGGCACGCCTTTGCAGTGGTTTGAGTCTAGGACGTACAATGAACA  
 CATAAGGGATGAAGGTATCGAGCAGTTGTTGTATATTTTCCAAGCTGCTGGTAAAAGAGACA  
 ATGACCCTCTTTTTTGGGGAGACGAGCTTGAGTACATGGTTGTAGATTTTGATGATAAGGAG  
 AGAAATTCTATGCTCGACGTTTGCCATGACAAGATACTCACTGAGCTTAATATGGAGGATTC  
 GTCCCTTTGTGAGGCTAACGATGTGAGTTTTACCCCTGAGTATGGCCGGTATATGTTAGAGG  
 CAACACCAGCTTCTCCATATTTGAATTACGTGGGTAGTTACGTTGAGGTTAACATGCAAAAA  
 AGACGTGCCATTGCAGAATATAAGCTATCTGAATATGCGAGACAAGATAGTAAAAATAACTT  
 GCATGTGGGCTCCAGGTCTGTCCCTTTGACGCTGACTGTCTTCCCGAGGATGGGATGCCCCG  
 ACTTTATTAACATTAAGGATCCGTGGAATCATAAAAATGCCGCTTCCAGTCTCTGTTTTTA  
 CCCGATGAAGTCATTAACAGACATGTCAGGTTTCCCTAACCTGACAGCATCCATCAGGACCAG  
 GCGTGGTGA AAAAGTTTTGCATGAATGTTCCCATGTATAAAGATATAGCTACTCCAGAAACGG  
 ATGACTCCATCTACGATCGAGATTGGTTTTTACCAGAAGACAAAGAGGGCAAACCTGGCTTCC  
 AAACCGGGTTTCATTTATATGGATTCCATGGTTTTTGGCATGGGCTGTTTCGTGCTTACAAGT  
 GACCTTTCAGGCACCCAATATCAACAAGGCACGTTACCTGTACGATGCATTAGTGAATTTTG  
 CACCTATAATGCTAGCCTTCTCTGCCGCTGCGCCTGCTTTTAAAGGTTGGCTAGCCGACCAA  
 GATGTTTCGTTGGAATGTGATATCTGGTGCGGTGGACGACCGTACTCCGAAGGAAAGAGGTGT  
 TGCGCCATTACTACCCAAATACAACAAGAACGGATTTGGAGGCATTGCCAAAGACGTACAAG  
 ATAAAGTCCTTGAAATACCAAAGTCAAGATATAGTTTCGGTTGATCTTTTCTTGGGTGGGTCG  
 AAATTTTTCAATAGGACTTATAACGACACAAAATGTACCTATTAATGAAAAAGTATTAGGACG  
 ACTACTAGAGAATGATAAGGCGCCACTGGACTATGATCTTGCTAAACATTTTGCGCATCTCT  
 ACATAAGAGATCCAGTATCTACATTCGAAGAATGTTGAATCAGGACAACAAAACGCTTCA  
 AATCACTTTGAAAACATCCAAAGTACAAATGGCAGACATTACGTTTTAAACCCCCACACA  
 ACAAGCAACCCCGACAAAAAGGATTTCTCCTGGTTGGAGAGTGAATTCAGACCATTGGAAG  
 TGCAACTATTAGATTTTGAGAACGCTGCGTATTCGGTGTCTATATACTTGATTGTTCGATAGC  
 ATTTTGACCTTTTCCGATAATATTAACGCATATATTCATATGTCCAAAGTATGGGAAAATAT  
 GAAGATAGCCATCACAGAGATGCTATCCTATTTGAAAAATTTTATTGGAAAAATCATTTT  
 GCAACGACACCGATGTGGAAACTGAAGATTATTTCTATAAGCGAGATTTTCCATAATCCAGAG  
 AATGGTATATTTCTCAATTTGTTACGCCAATCCTATGCCAAAAAGGGTTTGTAAACAAAGA  
 TTGGAAGAATTAAGCATTCTTCCAAACACGAGAGACTATACTATTATTTAAAGCTAATTT  
 CTGATAGAGCAAGCGGTGAATTGCCAACAACAGCAAAAATCTTTAGAAAATTTTGTACTACAA  
 CATCCAGATTACAAACATGATTCAAAAATTTCAAAGTCGATCAATTATGATTTGCTTTCTAC  
 GTGTGATAGACTTACCCATTTAGACGATTCAAAGGTGAATTGACATCCTTTTTTAGGAGCTG  
 AAATTCAGAAATATGTAAAAAAAATAAGCCTTCAATAGAAAGCAAATGTTAA

>YIL152W 1.69 Hot

ATGAGTCACAAGAGAAGGGGCTGGTAATATATCAGGATCAGAAGCAGCAACAACAACACCC  
 CCCGGGGCAGTCCCTAAGCTCTATATCCTGGTCTCCAACCAGGCGACCTCATCACCCCTTAA  
 AACAAACAAAGCACCAACAGTTTCTCAGAAATACTATCGAAATCAAGTGTGCAACCGAACGTG  
 CAACATGACGGTAATCATATGCCATTTTCATTGCTAGTTCTGAAACAAGAACATCATAAGCA  
 GCAGCAGCAGCAGCAGCAGCGCCAGAATATCCGATCACAAAACCTCTACGCCTCCCCTGCGAC  
 AGTTGGTTCAGGAGTCGCAGTGGACGAGCTCCGCAAGTAATAGTTCTCTAAAGAAACAGGAA  
 AAGCAGCCGCAAAACATTCTACAACACTGACTCTAAACTTGTTCCTCAACTGCATAGCTCCGT  
 GAAGGACCTGGATGCCATAATCCAGACGCATAAACCAAAGTTTGACACAATTATTGCGGATT  
 TCTCTCAAGCAACCATACTGTCCCTCAAACGAGTTACTCATCAAACCTCCGAAGGACCAAACA  
 ATAATATTGCATAGCAGAGCGCCAAAATTAACGCAGAATGGCTACAGAACAAGGTAAATGA  
 CCCTAGTGCCTCGTTAGTGATCGATTCAAGATCTTTTCTAACCTTGTGTAACAATATAAAAT  
 GGTACCTGCATTGGAAATTTATATGA

>YCR079W 1.75 Hot

ATGCGGCTGGGGAATGCTTATGCGTATTGCAAGCCGTCGCAAAATGTTGGGCTGAAGCTGGA  
 CTTGTTACGGGGTCTTCCAGGGTACGTGGGTACGCGCCACGAGTAGGATCAACCGGTTAGAGA  
 ACCAGGACAATTACTCCATTTAAAATGATGCGGTTCGTGGCCTAATGCGTATGGAAGTGCCCTG  
 AACTGCTCTGTATTTCGATGGCCATGGGGAGAAAGGTGCGCAACTGTCACAGTTGTTAGCCGA  
 TAAATTGTGCAGTAGCCTGGATTTCCTGAAACCCTCCTGGGACAAGCAGGACTTGAAGAAGT  
 TGGTACAGGAATATGCAAGAAGGTTTCCCGAGGGAAATTAAGTGGAAACATAAGCTGTCCACG  
 TTTGAAAAATTTCTACAACAAGTTTATAAAGAAGTGAACCTCGAAACAAGAAGTCTGTGCTGAT  
 GAAGGAGGGCGATAGTGCATCCTTGGACAAAATGGTGGCAGGATGATTTTTGATAAAAATGG  
 GGAATATTATTGACAAAATTGCACTGCTCACTGAGCTAGACCGTCTGCGATTGTTCTACGGG  
 TTTGCCAGGTTTCGATCTCGACCAATGCTGCGGCCTGGGCACCGCAGCGGGTCCACAGCGTC  
 GTCCATATTTCTATATCCGTATGATGATCCGAATGCACCCATTGATGAGGGGAAAGACGATG  
 ACTCGTGGATCATATCGCACTCTGGATTGCTCAAACCTCATTGTCACGCAGGTGGGCGACTCT  
 AAGATCATCCTCTGCGATCAAGACGGGATTGCACACGCATTAACAACAACCTCACCACATCAA  
 TTCCAGTAGGGAACGACACCGTTTGGACATAGACCTTCTCGATTGGACCCAGACGCCTTTG  
 GAGAGACAAGGTTTTTGAATAATTTTCGCCAACACTAGATCGTTTTGGTGATGTCGCTGGGAAA  
 CCGTATGGTATATCTAGTGAGCCGGATATTTTCTCGTTTTCTTGTGCGAAATACCTTGCATTT  
 GCCGCGATCTGAAAGGTGAAAGCTGCCCTTCAATGGTGTGATGAATGCTTCTGGCGCTTGTCA  
 CCGACGGCATCACCAATAAACTTGCAGACCAAGAGGTTGTTGACCTCATCACCTCTACGGTG  
 AACTCCTGGGGACTGAAAAAGGCGACTCCTCAATTTGTTGCAGAGGAGACAATCAAATTTAT  
 TCAGGCAATAGCCACTAAACACTCAGACAACGCCACTTGCCTGGTGGTTAGGCTTTCCAATT  
 GGGGCAACTGGCCCAATGTTGACAGAAGTGGCCCCAAAGAGAAACCAAACCTAATGAATGCA  
 CAATCTAACGAAACAAAATTAACATAA

>YDR188W 2.61 Hot

ATGTCATTGCAATTTGTTGAATCCGAAGGCTGAATCGTTGAGAAGGGATGCGGCTTTGAAGGT  
 TAACGTCACATCTGCTGAGGGCTTACAATCCGTCCCTAGAGACCAACTTGGGCCCTAAGGGCA  
 CGCTAAAGATGCTTGTGGATGGTGTGCTGGTAACATCAAGCTGACCAAGGACGGTAAAGTGTG  
 CTGACCGAGATGCAGATCCAGTGCCTACAGCGGTACTGATTGCTAGGGCAGCTGCCGCGCA  
 GGATGAAATCACGGGCGATGGGACCACGACGGTTGTGTCTTGTGGGTGAATTGCTTAGAC  
 AAGCGCACCGTTTCATTCAAGAGGGCGTGCATCCGCGGATCATCACTGATGGGTTTGAGATT  
 GCGCGGAAGGAGTCCATGAAATTTTTGGACGAATTCAGATCAGTAAGACGAACCTTTCCAA  
 TGATAGAGAGTTCCTTCTGCAAGTGGCCCCGGTCTGCTCGCTGCTAACCAAGGTGGACGCTGACT  
 TGACGGAGGTCTTGACGCCCATTGTAACGGATGCGGTGCTAAGCGTGTACGACGCGCAGGCT  
 GACAATTTGGATTTACACATGGTTGAGATCATGCAGATGCAGCACTTGTCTCCTAAAGATAC  
 CACTTTTATTAAGGGTTTGGTATTGGACCACGGTGGTAGGCATCCTGACATGCCACCCCGTG  
 TGAAGAACGCGTATGTTTTGATTTTGAACGTATCTTTGGAATACGAGAAGACTGAAGTTAAC  
 TCTGGGTTCTTTTACAGTTCTGCGGACCAAAGGGACAAGTTGGCCGCTAGTGAGAGGAAGTT  
 TGTGGATGCCAAGTTGAAGAAGATCATCGACTTGAAAAACGAAGTTTGTGGCATGGATCCAG  
 ACAAGGGTTTTGTTATCATTAACCAAAAAGGCATTGACCCCATGTCTTTAGACGTGTTTGGC  
 AAACACAACATCTTGGCTTTGAGAAGGGCCAAGAGACGTAACATGGAAAGATTGCAATTGGT  
 CACTGGCGGTGAAGCTCAGAACTCTGTGGAAGACTTGTGCGCTCAGATTCTTGGGTTTCTG  
 GCTTGGTCTACCAAGAAACCATAGGCGAGGAAAAATTCACATACGTTACAGAGAACACTGAC  
 CCCAAGTCTTGCACCATCTTAATCAAGGGCTCCACTCATTTATGCCCTCGCTCAAACAAAGGA

TGCGGTGAGAGATGGTCTCAGAGCTGTGGCAAACGTTCTCAAGGACAAAAACATCATTCCAG  
 GCGCTGGTGCCTTCTACATCGCCCTTTCGAGATACCTAAGATCTGCCAACATGAACAAGTTG  
 GGTGCCAAGGGTAAAACAAAGACAGGTATTGAGGCGTTCGCAGAAGCATTGCTGGTAATTCC  
 AAAGACTTTGGTGAAGAACTCAGGATTTCGACCCATTGGACGTGCTCGCAATGGTGGAGGACG  
 AGTTGGATGACGCTCAGGATTCTGACGAAACGAGATATGTTGGTGTGGACTTGAACATAGGT  
 GATTCCTGCGACCCCTACCATCGAGGGTATTTGGGATTCTACC CGTACTAAGAAATGCTAT  
 TACCGGTGCTACAGGTATTGCCAGCAACTTGTATTATGCGATGAATTGTTAAGGGCAGGTA  
 GATCCACTTTGAAAGAAACACCACAGTAA

>YJL055W 1.69 Hot

ATGACAATGGAAAAAATGGAGGTAATAGCAGCCGTGGTGGCCAAGTAGGCGGCAAGTCTGT  
 GTGTGTTTACTGCGGGTCTTCATTTGGCGCTAAGGCGCTATACTCAGAAAAGTGCAGAAGAAT  
 TAGGAGCCCTTTCCATAAGCTGGGATGGAAAATTGGTATACGGTGGAGGCACTACTGGTTTG  
 ATGGGCAAGATAGCAAGGTCTACGATGGGACCTGATTTAAGCGGACAGGTTACCGGTATCAT  
 TCCAAATGCACCTTGTGTCTAAGGAAAGGACAGACGAGGATAAAGAAGATGTTAATAAAGCAT  
 TGTGGAGTCTGTAGAAAATCATAAGGGCGCCACTCCTATTTCTGAAGAGTATGGGGAAACA  
 ACGATTGTACCAGATATGCATACGAGAAAAAGAATGATGGCAAATTTGAGTGACGCGTTTGT  
 TGCTATGCCTGGTGGATACGGGACTTTTGAAGAAATCATGGAATGTATCACGTGGTCGCAAC  
 TGGGGATTCCATAATAAACCAATTATCTTGTTC AATATCGATGGGTTCTATGACAAATTATTG  
 GAGTTCCTCAAACACTCTATTCAAGAACGGTTCATCAGTGTGAAGAATGGTGAATCATTCA  
 AGTTGCCTCCACTCCGCAGGAAGTTGTTGATAAAAATAGAGAAGTACGTCGTTCCAGAGGGCC  
 GTTTC AATTTGAATTGGAGCGACGAAGGTCACGCTCACGAGGATTGTGCTAAATAA

>YDR476C 1.67 Hot

ATGTGGGATTTCGTTAATTGTAAGCATCAACGATACGCACAAGTTGGGGCTGGAGGATTGTCT  
 CGCCGTTTTTGGCCACGTTCCCATACCAGGCCGTCAAGCATGTCAGACTGACAGAGATCG  
 ACACGCAGACGTCCACGTTTACGCTCAAGTTCCTTACACAGAAACGGGTCAGAACATCGAG  
 AAGATTATCTACTTCATTGACAATGACACGGGCAACGATACCCGCACTGCTACCGGAATCAA  
 GCAAATCTTCAACAAGATGTTCCGCATCGCTGCGGAGAAGAGGAAGCTGTCGCTCATCCAGA  
 TCGACACTGTTGAGTACCCCTGC ACTCTAGTAGACTTGTGATCCTGGTAGGCGTGGCGCTA  
 CCGCCATTGTGCTACCTCTATCGTCTGC ACTGCACGCTATCTTTTTTCTGGTCCCTAATCC  
 TGTGGGCTCCACCTTAGAGGCGTGGCTGGATAGTGATCTTGTGCTGCGACTCATCATTGTTG  
 CCGAGTTCCTGACTCACGCCCTCGAGACGCTCATTTTTCGTCTCCTAGGCTCAAGTACTAC  
 CGTGTTCCTGGCGAGTTCGTGCCCGAGTGGCTTCTTCTAGGTCTCCTCGAAGGTTACGGTCC  
 TGCGAGACGTCTAGATACTAAGGCTCGCACTCTTGGCGAAGGGTCAGTTAATTAG

>YPL127C 1.61 Hot

ATGGCACCCAAGAAATCCACTACCAAGACCACAAGTAAGGGCAAGAAGCCTGCAACCAGCAA  
 AGGCAAGGAGAAATCAACTTCCAAGGCCGCTATCAAGAAAACCACGGCAAAAAGGAGGAAG  
 CTTCTTCCAAGAGTTACAGGGAGTTGATCATTGAAGGGCTCACGGCTTTGAAGGAACGTAAG  
 GGATCCAGTCGTCCGGCACTCAAGAAGTTTATCAAGGAAAAC TACCCGATCGTCCGATCCGC  
 AAGCAACTTTGATTTGTACTTCAACAATGCCATAAAGAAGGGTGTGGAGGCGCGATTTTG  
 AACAGCCAAAGGGACCCGCTGGTGTGTGAAACTGGCCAAGAAGAAATCTCCAGAAGTAAAG  
 AAAGAAAAAGAGGTCAGTCCAAAACCCAAGCAAGCCGCCACTTCTGTGAGTGAACCCGCATC  
 AAAAGCGAAAGCCGCATCCACGAAGCTAGCGCCAAGAAAGTAGTGAAAAAAAATCGCCTA  
 CTGTTACCGCCAAGAAGGCCTCTTCGCCTTCTTCATTGACCTACAAGGAAATGATCCTTAAA  
 AGCATGCCTCAACTTAATGACGGTAAGGGCTCCAGCCGATATCGTTTTAAAGAAGTATGTCAA  
 GGACACTTTCTCCTCCAAGTTGAAAACAAGCTCAAATTTTGACTATCTGTTCAATAGCGCTA  
 TCAAGAAATGTGTTGAAAACGGCGAGTTAGTGCAACCAAAGGGCCCTCCGGCATTATATAA  
 CTAACAAGAAGAAGGTCAAAC TCTCCACGTAA

>YAL022C 1.52 Hot

ATGAGTACTAGTGC GGACACTGATACCATCAAGAAGCCAATCCTTGCGGTGCCAGAGCCTGC  
 ACTGGCCGATACGCATTCAGAGGAGATATCACGCTCTGGAGAAGAACATGAATCAGAGAACA  
 ACGAGCACTCAGATGAAGAAGGCGATAATTAATCTGAAAGAGAGCAATCTGTGTCAACCGAA  
 CCACTGGATACATTCGCGTTAAGAAAAAAGTTGAAAAATCTTTCATATATTACATTTTTCGC  
 CATAGGAATAGGTC TTTTATGGCCGTGGAAC TGTATCCTCAGTGCCTCGCAATATTTAAGC

ACGATATTTTCAAAGACACCTCCATTTGGGCAAAGATCTTCACAAGCTCTATGATGTCCTTT  
TCTACCATATCGTCAATGCTGTTCAACATCTACTTGGCCAAAAGACAGTACAAATACTCGAG  
AAGGGTCATAAACGGGCTTGTGTGGGAGATTATTGTCTTTACTGTGCATGTGCTTCTTTACAA  
TTTTGCATTTCTTTTACCTAAATGGTTCAATTTTCATGTTTATAATGATGCTTGTAGTGATC  
AGTTCATGGGGACAGCCATGACACAGAATGGTATCATGGCCATAGCCAACGTCTTCGGTTC  
CGAGTACAGTCAAGGTGTCATGGTGGGGCAAGCCGTTGCTGGTGTCTTCCCTCCCTAGTGC  
TTTTTGCCCTAGCTTTCATCGAGAACTCTTCTGTGTCTACTACGGGCGGGATTCTTCTATAC  
TTTTTTACCACAACACTCGTGGTCACCATTTGTGTGGTTCATGTTTTCAGCGTGAGCAAAATCAG  
TCGGAAAGTGAACGAGAATTGGAATGTGGAAGACGGACATATCACTGATGTGTTGTTAGGGT  
CTCTGCGCTCCAATGAGGAGGAAATCCGTATTGTTGGCCGATTGACCAAATGGAGGATGAA  
GACCACCGCCGACCAACGGCACTCGCGACGACAACGACGAAGGTGAGGAACTCCAATAAA  
AGTGCCTTTTCGAGGTCTTATTTGCCAAACTAAAGTACCTGGTTCTTTCCATATTCACCACGT  
TTGTCGTAACCTTGTTTTTTCTGTATTTGCGTCTGCCACCTACGTGACAGGGCTTCCTTTA  
AGCAACGCACAGTACATACCTCTCATATTCACGCTGTGGAACCTAGGCGACCTTTACGGAAG  
AGTCATTGCCGACTGGCCCATGTTCCGTGACCAGAAATTTACGCCACGCAAAACCTTCATCT  
ACTCATTGTTGCGGGTGGCCGCAATACCACTGTTCTTGATGTTTACAGCCATCACCTCCTCT  
TCAAGCGGCGATGAAGAGCACAATGGCTCCGTAATCGTTGACTTGTGTTACATGCTACTGCA  
GTTCCTTTTTCGGCGTAACCAACGGGCACGTCTCTATGAGTTTCATGAAGGTGCCAGAGC  
AACTGGACAACGACGACGAGAAGGAAGCGGCCGTTGATTCACTAATATTTTCGTTTCTACA  
GGACTAGCTCTGGGCAGCATCATAAGCTACGTATTCGTCTTCATAATTGACTTTTATTATCAG  
GTAG

>YNL245C 1.94 Hot

ATGGGGTTCGGGCGATTTGAATCTGTTGAAATCATGGAATCCCAAGCTTATGAAAAATAGAAA  
AAAAGTATGGGAGACCGAACAGGATCTAATTACCGAACAGCAGAAGCTTAACACGCGATTGA  
AAGAAATTGAAAAAGAACGAGAACTAAATGAACTGCTGAACGAATCGAGCAAGGATAAGCCG  
GAGACTCTCAAGAATGACTTGGCTTTGAAGAAGTCGGGCTTGAATGGATGTATCAGGATGC  
AAAACCTGAGTGACGAAAAGGAAGACTATTTATTAGGTAAGAAAAAACTAGATTCATCTATAC  
TAAACCAACCTGCAACACCGCCTGTAAGGGCGGCCACTACTATTTCCGCTTCTGGTGCCGCA  
ACATCCATAAGTTTCGCGAGAAGAAGAAGTCAAAATTTGCTTAAAGATGATCCAATGAGTAAGTT  
TAAGGTAACCTAAACAACAAGAAGAAGTCCAGACTCAACAAAAAAAAGAGCAATGTGCGAAC  
GAGGAAACCGTTGTCCAAGCCCGCTCCGGACCTAGACTACTAA

>YIL152W 1.69 Hot

ATGAGTCACAAGAGAAGGGCCTGGTAATATATCAGGATCAGAAGCAGCAACAACAACACCC  
CCCGGGCAGTCCCCTAAGCTCTATATCCTGGTCTCCAACCAGGCGACCTCATCACCCCTTAA  
AACAAACAAGCACCAACAGTTTCTCAGAAATACTATCGAAATCAAGTGTGCAACCGAACGTG  
CAACATGACGGTAATCATATGCCATTTTCATTGCTAGTTCTGAAACAAGAACATCATAAGCA  
GCAGCAGCAGCAGCAGCAGCGCCAGAATATCCGATCACAAAACCTCTACGCCTCCCCTGCGAC  
AGTTGGTTTCAGGAGTCGCGAGTGACGAGCTCCGCAAGTAATAGTTCTCTAAAGAAACAGGAA  
AAGCAGCCGCAACATTCTACAACACTGACTCTAAACTTGTCTCAACTGCATAGCTCCGT  
GAAGGACCTGGATGCCATAATCCAGACGCATAAACCAAAGTTTGACACAATTATTTCGCGATT  
TCTCTCAAGCAACCATACTGTCCCTCAAACGAGTTACTCATCAAACCTCCGAAGGACCAAACA  
ATAATATTGCATAGCAGAGCGCCAAAATTAACGCAGAATGGCTACAGAACAAGGTTAATGA  
CCCTAGTGCCTCGTTAGTGATCGATTCAAGATCTTTTCTAACCTTGTGTAACAATATAAAAT  
GGTACCTGCATTGGAATTTATATGA

>YJR112W 1.82 Hot

ATGGTTAACTCACATGGAATACGGTATATTCGGTTGAAGCAGGTCTTTAATCGTGCATTGGA  
CCAATCGATTTTCGAAATTACAGAGTTGGGACAAGGTCAGTTCATGCTTCCCGCAATATGTGA  
ATAGCAAGCAGGGCGCTATAAACGTCGCCAATTTGTCAGCGCCAATTAACGGAATTCTGGACG  
GAGCTTTGTCAACGAGAGTTTAAAGAAATTAATGGAAGAACGAAACGTGAGCAGAAACTAAA  
TGAGTTGGACGAACTGATTTTGGAGGCTAAAGAAGGTTACACGGATCGTGATCAAGATGAAG  
TAAACAAGGGCCCGGATCGATGAGCTCTCCAGCAAAGAGCTTGTGGAATGCCATTTATAC  
AGCCAACGGATGCATGCCATACAGAGATAGACGAGCGGCTTGCGAAAGTGAATGAGATGAA  
CGACCAGTTAGCCCAGGAGTTGAAAGACTTAGAGACGCAAGTAGAGGTAGAGAAAAACGAAA



TTGGCAAGATGTACGATGAGTACCTGGGCTCCACACGGACCAACCGGCCAACGTGCTGCTG  
GTACAGAGCCTCAATGATATGGTCTTGGAATTGAAGGAAAACCTATTGA

>YPL088W 1.95 Hot

ATGGTTTTAGTTAAGCAGGTAAGACTCGGTAACCTCAGGTCTTAAGATATCACCGATAGTGAT  
AGGATGTATGTCATACGGGTCCAAGAAATGGGCGGACTGGGTCATAGAGGACAAGACCCAAA  
TTTTCAAGATTATGAAGCATTGTTACGATAAAGGTCTTCGTACTTTTGACACAGCAGATTTT  
TATCTAATGGTTTGAGTGAAAGAATAATTAAGGAGTTTCTGGAGTACTACAGTATAAAGAG  
AGAAACGGTGGTGATTATGACCAAAATTTACTTCCCAGTTGATGAAACGCTTGATTTGCATC  
ATAACTTCACTTTAAATGAATTTGAAGAATTGGACTTGTCCAACCAGCGGGGTTTATCCAGA  
AAGCATATAATTGCTGGTGTGAGAACTCTGTGAAAAGACTGGGCACATATATAGACCTTTT  
ACAAATTCACAGATTAGATCATGAAACGCCAATGAAAGAGATCATGAAGGCATTGAATGATG  
TTGTTGAAGCGGGCCACGTTAGATACATTGGGGCTTCGAGTATGTTGGCAACTGAATTTGCA  
GAACTGCAGTTCACAGCCGATAAATATGGCTGGTTTTCAGTTCATTTCTTCGCAGTCTTACTA  
CAATTTGCTCTATCGTGAAGATGAACGCGAATGATTCTTTTGCCAAAAGACACAATATTG  
GTTTACTTCCATGGTCTCCTAACGCACGAGGCATGTTGACTCGTCTCTGAACCAAAGCAGC  
GACAGGATTAAGAGTGATCCAACTTTCAAGTCGTTACATTTGGATAATCTCGAAGAAGAACA  
AAAGGAAATTATAAATCGTGTGAAAAGGTGTCGAAGGACAAAAAAGTCTCGATGGCTATGC  
TCTCCATTGCATGGGTTTTGCATAAAGGATGTCACCCTATTGTGGGATTGAACACTACAGCA  
AGAGTAGACGAAGCGATTGCCGCACTACAAGTAACTCTAACAGAAGAAGAGATAAAGTACCT  
CGAGGAGCCCTACAAACCCAGAGGCAAAGATGTTAA

>YHL020C 1.93 Hot

ATGTCCTGAAAATCAACGTTTAGGATTATCAGAGGAAGAGGTAGAAGCGGCTGAAGTACTTGG  
GGTGTGAAACAATCATGCAGACAGAAGTCGCAGCCTTCAGAGGACGTCTCACAAGCTGACA  
AAATGCCGGCAAGTGAGTCGTCTACGACGCCGCTAAACATTTTGGATCGCGTAAGTAACAAA  
ATTATCAGTAACGTAGTGACATTCTACGATGAAATAAACACCAACAAGAGGCCACTGAAATC  
AATAGGGAGGCTGCTAGACGATGACGATGACGAGCATGATGATTACGACTACAACGACGATG  
AGTTCCTCACCAACAAGAGACAGAAGCTGTGCGGGCGATTGCCAAGGGGAAGGACAACCTTG  
AAAGAGTACAAGCTGAACATGTCCATCGAGTCTAAGAAGAGGCTTGTAACGTGCTTGCACTCT  
TTTAAAGCTGGCCAATAAGCAGCTTTCCGATAAAATCTCGTGTTTACAGGACCTTGTTGAAA  
AGGAGCAGGTGCATCCTTTGCACAAGCAAGATGGAAATGCTAGGACGACCCTGGAGCTGGC  
GAGGACGAGACATCGTCAGACGAAGACGACGACGATGAGGAGTTTTTTTGATGCCTCAGAGCA  
GGTCAACGCCAGCGAGCAGTCTATTGTGGTGAATAAGGAGTGGTTCGGCACAGTCAAGAAAG  
TCTACTCGCTGATATCGAAGTTCACAGCAAATTCGCTGCCGAGCCCGCAAGATCTCAGGTT  
CGGAAAGTCTTCTAAACTTACCCACAAATTTGGTTCGACAGCGTCCACAGTACATCACTGCC  
GCATCATGCTTCGTTTTCATTATGCCAAGTGTGAAGAACAAGTGGAGCAACAGCAACAGC  
AACAGCAACAGCAGCAGCAGCAGCAACTTTTGCAGCAGCAACTCCTGCAACAGCAACAGCAA  
AAAAGGAACAAGGATGGCGACGACTCAGCCTCGCCGTCCTCCTCCGTAACCTGCGAATGGGAA  
AGTACTCATTCTCGCCAAAGAATCCCTGAAAATGGTGAGAAATGTCATGGGCGTAGTGCAGT  
CCACGTTGGGCAAGGCTGAAGAATGGGTGAAGCAGAAACAGGAGGTAAAAGAAATGATCAGG  
GAGCGTTTCTTGCAACAGCAGCAACAGTACAGGCAGCAACAGCAGAAGGATGGCAATTACGT  
AAAGCCCTCTCAGGACAACGTGGATAGCAAGGACTAA

>YNL056W 2.27 Hot

ATGAAATACATACCCCATTAATTTTTTCGCCAGTGGTGAGCACGGATGTATCGTTATATCG  
ATCGGGATACCCGATGCCGTTAAATTATAGTTTCATCAAGCATCAGTTACACTTGAAGACCA  
TAATATATATTGGCGATAAAGATAGGCCTCTCGAAGAATATCAAAGCTTCTGGAGTCAGAA  
AAGATAAAATACTATCACATATTTATGGATTCAAGCCGCGATGAAGGAATTCGAAGAAAGAA  
GAACCAGGTCTTGCACCTGGTGTGGATGTCAGAACTATCCCATCTTAGTGCATTCCAATA  
AGGGCAAGCACCGTGTGGTGTAGTTGTGGGAATCATAAGAAAGTTGTTACAGGGATGGTCC  
ACTGCAGGTATATGCCAAGAGTACGGGTTATTTTCTGGTGGGATGAAAGATGGAGTAGATTT  
GGAGTTTATCACAATGTTTCGAAACCAATCTGAAAATACCGAGAAACGTTATCCCTGGCTTTG  
CTAAACACTGCTTGTATTTGAATGAGCTAGAGGCTGCGGAAGGAAGTGATGATGAGTCAGGA  
AGTGAGTCTATTCTCACTGCCAAGCAACCAATATGA

>YGR161C 2.08 Hot

ATGATCGCTACCTCCAGAGCCGTAACATGAATAAAGAATCAAAACACAAGAAGGCTGTTGC  
CAAACCATGCAGAGAGAGACAAACTTCAGTTACAAGAGCCATGAGACCAGCTGTAGCACGTG  
ATCCTCGCAGACTTTCGACGTCGTCGTCTCCTTCTTCGTCACCAATGTCAGCACAGAGAAGG  
CTTTCGAGGGAAGAAATAATAAACGAAATGGAAAAGGAGCAAGACGCTATTGTAGTAAGACT  
TCTACGGGAAATGAAACTTTAAAAGAAGAAAACCTAGGTTAAAAAATCAACTGCACCATC  
CGGTCGCCGCTAGAAGGTCGTCTCCATTTTTTCGAAGGCGAGTCTGCCATCCTAGATGATGAT  
GACTGCAATTATGGTTACACCCCTCGACACTCCAAAGCTAAAGCTCACAGATGGTGCATCCAG  
ACACACCGTACTTCCCTTAACACCCAAGGACTCCATGACCCACATTTCCCATTCGCCAGAA  
GGTCAAGCCGGAACGCTTCCATATCTAACGGAACAAGCATCTCAGACACGATTTTCCCATT  
GAGACTAAAATCCACTCAGCACCAACAACAACAGAAACCTTCCCTCCGCCGATCTTCCACA  
TCACACTCTTCTTCCACGTTCTCTAAGCGGCATTTTCGTCTAGCGATTTAACCGAATCCGGTG  
CTCTTCTTCATGACAGGAGAAGGCGTTCTTCCAATTACAGTCTCGATGGCTCAAACCTTTTA  
AAGGCTGATCTCATGGCAAAGAGATTCCAAACTGGTTCATTGAAATAG

>YDR046C 1.82 Hot

ATGTCAGATCCTATAGTAACGTCCTTCCAAAAATGGAAAAAAGTGCAGAGTTTGAAGTAACAGA  
CTCTGCTTTTATATAATAACTTCAATACATCAACAACAGCTTCACTAACTCCGGAGATTAAGG  
AACATTTCTGAGGAATCTCGCAATGGGTTAGTTCACAGATTCGTGCGACTCATTGAGAAGAGCC  
GAAAGCCAACGTTTAGAAGAAGACAATGACTTGGAGGATGGTACCAAATCGATGAAATCTAA  
TAACCACTTAAAAAAGTCAATGAAATCTAGACATGTTGTAATGATGTCTTTAGGTACAGGGA  
TAGGAACAGGTCTTCTAGTTGCCAACGCCAAAGGTTTGGAGTCTTGCAGGCCCGGGTCTTTA  
GTCATCGGTTACGTTATGGTGTCTTTCGTACGATTTTTATGGTCCAAGCGGCTGGTGAGAT  
GGGTGTCACTTATCCGACGCTTCCAGGTAACCTTCAATGCATACAATTCAATCTTTATTTCAA  
AGTCGTTTTGGGTTGCGGACCACTTGGTTATTTTGCATTCAGTGGTTAACTGTGCTACCGTTG  
GAATTGATTACTTCTTCCATGACCGTCAAGTACTGGAATGACACAATTAATGCTGATGTATT  
CATTGTCATTTTCTATGTGTTTTTATTGTTTATCCACTTTTTTGGTGTAAAGGCATACGGTG  
AAACGGAATTTTATCTTCAATTCCTGTAAGATATTGATGGTTGCAGGATTCATTATTTTATCA  
GTCGTCAATGTTGGGGGAGCCGGTGTGGACGGCTATATTGGCGGCAAATATTGGCGCGA  
CCCTGGTTCATTTGCAGAAGGCAGCGGTGCCACTCGTTTTCAAAGGGATATGTTATATTCTAG  
TATCTGCATATTTCTCCTTCGGTGGTATTGAATTATTTGTTCTTTCCATCAATGAGCAGTCT  
AACCTTAGAAAATCCACTCCTGTAGCCGCGAAGAGAAGTGTATATCGTATTTTTGATCATTTA  
TTTGCTGACAATGATTCTAATTGGGTTCAATGTTTCCCTCACATAACGATCAATTGATGGGTT  
CCGGTGGCTCCGCAACGCACGCTTACCATATGTCTTGGCAGCCTCTATTACAAAGGTTAGG  
GTCATCCCCCATATCATTAAATGCTGTTATTTTGTATATCAGTCATCTCTGTTGCCAACTCTGC  
CCTTTATGCCGCACCGAGATTAATGTGTTTCTTGGCTCAACAGGGCTATGCTCCAAAATTTT  
TGAACATATATTGATAGGGAGGGAAGACCTTTAAGGGCCTTGGTAGTGTGCTCTCTTGTGGT  
GTCGTTGGCTTCGTGCGCTGTTCTCCACAGGAAGAGCAAGCATTTACATGGTTGGCAGCCAT  
TGCAGGTTTGGAGTGAACTTTTACATGGTCCAGGCATTATGCTTTTACACATTCGATTCAGAA  
AAGCGATGAAAGTCCAAGGAAGATCACTTGATGAAGTCGGCTATAAGGCCAATACCGGTATA  
TGGGTTTCACTACTATGGGGTTTTTTTTCAATATGCTTGTCTTTATGGCCCAATTTTGGGTGCG  
ACTGTCTCCAATAGGAAATGGCGGAAAGTGTGATGCTCAGGCATTCTTCGAGAGTTATCTGG  
CTGCCCGCTATGGATATTCATGTATGTTGGATACATGGTTTACAAAAGAGATTTTACCTTT  
TTAAACCCACTGGACAAGATCGACTTGGACTTTCATAGAAGAGTTTACGACCCTGAAATAAT  
GAGGCAGGAGGACGAAGAAAAATAAGAAAGGTTAAAGAACTCTTCAATATTCGTGAGAGTCT  
ACAAATTTTGGTGTAG

>YAL069W 1.54 Hot

ATGATCGTAAATAACACACACGCTTACCCTACCCTTTATACCACCACCACATGCCATAC  
TCACCCTCACTTGTATACTGATTTTACGTACGCACACGGATGCTACAGTATATAACCATCTCA  
AACTTACCCTACTCTCAGATTCACCTTCACTCCATGGCCATCTCTCACTGAATCAGTACCA  
AATGCACTCACATCATTATGCACGGCACTTGCCTCAGCGGTCTATACCCTGTGCCATTTACC  
CATAACGCCCATCATTATCCACATTTTGGATATCTATATCTCATTTCGGCGGTCCCAAATATTG  
TATAA

>YIL041W 2.13 Hot

ATGTCGTTTTAATGCCTTCGCCAGCTCTTTGAGCAAGAAATACAGGAAATATCCACAAGTGT  
TTCCGAAAAAACCAGGAATTGCCAGTTTGGCGCAATCCACCCAAAGAATGGTCCAGGAAC

GTTTGGGCCAGGTGACGGACATCTCCCAATTGCCAAGAGAGTACACAGAGCTGGAAGATAAG  
 GTTGACACCATCAAACCTGATTACAACCCTTCTTGGGTGTAAGTCTATCTACGAAAACGG  
 ATCGTACGATTACCCTAAATACATCAACGAATCCGTCAACGAGTTTTCAAGAAGCGTGGCTT  
 CCAAGTTGACAGAGTTGACTCATGCTACATCTGCGTCTGAGGCACAAAACATCTTAGTTGCT  
 CCAGGCCCATCAAAGAACCAAGACGTTGAACTACGCCCTCAGTAAAGTGGCTTTGAACTC  
 CAGTGAATGTTTGAACAAGATGTTCCCCACCGAGGAACAACCCTTGGCTTCGGCACTCTTGC  
 AATTCAGTGATGTGCAGGCTAAGATTGCTCAAGCTAGAATTCAACAAGATACCTTGATTCAA  
 ACCAAATTCATAAAAAATTTGAGGGAAAGGCTCTCTTTTGGAGATCGGTAAGGCCGATAAGTG  
 CCGCAAGGATGTCCATTCATGAGATTAAGATATGACGTGGCAAGAATAACTTGGCAAACA  
 ACAAGAAGCCAGAAAAGGAAGCTTCCTTGAGAGTCCAAATGGAGACTTTGGAAGACCAGTTT  
 GCTCAAGTCACTGAAGACGCTACTGTGTGCTTGCAGGAGGTTATTTCTCACGCTAACTTCAG  
 TGAAGATTTGAAGGAATTGGCCAAGGCTCAAGCTGAGTATTTTAAAACCTCGGCTGGCCTAA  
 TGAAGAGTTCTTATCCAACCTCATTTGCGGAAGAGCCGGAAGCAAAGCCTGAGGTTGCAGAA  
 GAAGAAAAGCCACAGACAGCTATCTCTATGAATGACGAAGACGACGCTTAA

>YPL092W 1.96 Hot

ATGGTTGCCAATTGGGTACTTGCTCTTACGAGGCAGTTTGACCCCTTCATGTTTATGATGGT  
 CATGGGTGTGGCATTTCATCGAATATTCTATATAGCTTCCCATATCCTGCAAGGTGGCTAA  
 GAATATGCTCCTACATCATGTTTGCTATCGCTTGCCTTATTTTCATTGCTGTGCAGGCACTA  
 CAAATATTACATTTGATTGCTATATTAAGGAGAAAAGCTTCAGAGAATATTTTAATGACTT  
 TTTTCAGAAATATGAAGCACAATTTATTTTGGGGTACTTATCCCATGGGGTTAGTTACAATTA  
 TAAATTTCTTAGGAGCACTCTCGAAAGCGAACACGACGAAGAGCCCCACTAATGCCAGAAAT  
 TTGATGATATTTGTTTACGCTTGTGGTGGTATGATCTCGCAGTCTGTCTAGTAATAGCGTG  
 GGGTATCTCGTTTCTCATCTGGCATGACTATTACCCTTTGGAAGGGATTGGGAATTATCCTT  
 CATATAATATCAAATGGCATCCGAAAACATGAAAAGTGTATTGCTACTGGATATCATTCGG  
 CTGGTTGTCTCGCTTCAAGTTGTGGAACATTCACAATGTCAGAAATATTTCTTCATGCGTT  
 TAATAGAAACATTCAACTGATAACGTTGGTCATATGTGCCTTAACGTGGCTGCATGCCATTA  
 TCTTCGTCTTCATACTGATTGCGATATACTTCTGGAGTCTTTATATTAATAAGATACCACCA  
 ATGACACAGGTTTTACCTTATTCCTGCTTTTGGGCCCGATGGGCCAAGGAAGTTTTGGAGT  
 CTTATTGCTTACAGATAATATAAAAAAATATGCGGGCAAATATTACCCAACAGATAACATTA  
 CAAGAGAACAAGAGATATTGACTATTGCAGTTCATGGTGTTCAAAATTCAGGCATGGTT  
 TCTGCTATGGCATTGCTCGCTATGGGCTATTTTTTACCCTGATTTCTGTGCTTTCAATCCT  
 GTCGTACTACAATAAAAAAGAGATTGAAAACGAGACAGGAAAAGTGAAGAGAGTTTATACCT  
 TCCACAAAGGTTTTTGGGGGATGACTTTCCCGATGGGTAATATGTCTTTAGGAAACGAAGAG  
 TTATATGTGCAGTATAACCAGTACGTTCCCTTATATGCATTTAGAGTCTTAGGAACCATATA  
 CGGCGGTGTTTGCCTTTGTTGGTCAATTCTATGCCTTTTATGCACATTGCATGAGTATTCTA  
 AAAAGATGCTGCATGCTGCCCGTAAATCTTATTATTTTTCAGAGTCAGGTACGGAAAAGACG  
 ACAGTTTTCTCCGTATAACAGCATTGAAAGCGTGAAGAATCAAACCTCGGCTCTAGATTTTAC  
 GCGTTTAGCATAA

>YIL154C 2.04 Hot

ATGCAGAAGAGCATATTGCTGACTAAACCTGACGGAACACAATCGAATCTACACAGCATCAA  
 AACGGAAACGCCACCACGGTGGAGTTCGACTCGGAGCAGATGGAAAGGGCCACAGGGAAA  
 GAGGTCGTAGCAAGAAGAAAAGAGGCGAACGAGACTCAAACGTGAGCAGTCTGTGCGGGTCCG  
 AGAAGCAGGGCCAGTAGCCGCAGCAGAGTAAGGGAGGAAGAGTTCTCAAGTGGACCGTGT  
 GAGGCAGGACCCCTCGATGCGGTTGAGGGTCTGGATGTGGATTCTGAAGAGGAAGGTGAGG  
 GCAACGACGAAGATGACGACGACGGCGACGGCGACGATATGGACGAGGAAGAGTCCGATGAA  
 GAGCAAGTGAAGCATATAGAGAACGATTTAGAGATTGACGAGGAGTTCCACTACGATCTGGG  
 CATGAAAGTGTACCCAACCTTTTGTACCAGCATAAACGAAGTGTAGACTCCAGCAAGCCCT  
 GGATAGCCAAGTACGAGATCAGCATCCGTGGCCACGAAAACGAAGACGTGTCTCTGGAGCAA  
 CTCGACGGAGGCTACGTGAGGACCATGCAACTACTACCAAGGGTGCAGGCGCAGAGGCCGG  
 GAACCAAAGGTCTTCATCCTCTACACGGACCTGAGCAGCGAGTCCACCTACGCCCTGACCT  
 ATCTCATGGGCGCAGCTGTCAACCAGGGAGACACCGTCTACATTGTCCACTGGGAGCCCTCG  
 AAGCCACGGACGACTCCAGATGTTTCGCCAACGTTGCCAGAATCAGAAAGCACGTATGCA  
 CCTGTTTACTGCGTCGCGGGCGTGTCTGACGACCTCGACGTCGTCTCTCTCTTGAACC  
 ATCCGTACCAAAAACCTCCTCAACGAGATGATCCACGGCCTCAAGCCAGTCCGCTGTGC

TGCTCCCTCTCGGTCATCCTGTCCACTCTGCAGAACTTCGTCTGCTCTGTGCCCATCCTCGC  
GGTTAGAAAGAAGCTGAAACGTGCCAAGCGCAAGGGCATCAGCGAGTGA

(2) S<sup>-</sup>: 591 recombination cold spots

>YPR115W 0.78 Cold

ATGCTGACTATTTACGTTTTCCCTAAGCAGGAGAATGGCGGTATCTCGAAGCAGCCTGCGAC  
ACCAGGTTCAACTCGGAGCTCTTCTAGAAAATTTGGAGTTACCGAAGAACTATCGTTTCATTTG  
GTGGTAGTAGCGATGAACTGGCATCTATGTATTCGGCCGACTCCCAGTACTTTGATGGATATG  
ATTCCTGATTCATTGACGCTGAAAAATGAGCCAGCATCTGGAAATACGCAAATGAACGGGCC  
AGATGGCAAAGAGAATAAGGACATAAAACTTGACGAGTATATATTACCCAAGACAGACCCAA  
GGTCACCCTACTATATTAACATGCCTATAACCTAAAAAATGCCGAAGAGTGAAGGTAAGGCG  
AGGGCTAAACAAAAGGTTAACAGGGCTGATCCTTCTGATTTAGATGTGGAGAACATTTACGA  
AACTTCCGGGGAGTTTGTAGAGAGTATCCGACAGATATTTTGATTGATAGGTTTCACAAAT  
GGAAGAAAATCTTGAAAAGTTTGATCGCTTACTTCAGAGAAGCTGCCTACTCTCAGGAACAA  
ATTGCAAGGATCAACTACCAGATGAAAAATGCCGTAATAATTTGCTTTTTCTTACTGATTTGGA  
AGATGAAACAAACAAACTGGTTGATCCAAGTATATCTAAGTTGCCTACTAAGAAACCTCAGC  
CTGTCCCATTTGGCCGCTCAAAAATTTGGACAGCAAGTACGACACAGATGTGGAACAGCCGCAG  
TCAATCCAATCAGTACCTTCGGAAGAGGTAGCTTCAGCTTCTTCTGGCTTCATGAAAATTTGG  
GTCAGGATCCATCAAGATATCAAGTGATTTTGAAGAAGTACCATTTATCTTTGGGTAGTC  
AACAAATAAGATCTCTAAGGAAATCTTGGCATATATTTATACCCAATTTGACCGACTTGCCT  
AAGGATTTGACCACAAAGATGAAAGAAATTAAGAATTAATGGAGATTTCAAGACTAACAT  
AGGCGAGCATATCAAAATAACAAGCAGGCTTCTGAATAAATATATTGCTTCAGTGAAGTTAT  
TAGATGAAGCATCCACTTCGGGCGATAAGCAAGGTGAAAAATTAACCAAAACACGATCCA  
TACCTTTTTGAAAATTACAACCTAGATTTGCAGCTGAAAAGACAATTACTCGAAGAAAACCTATCT  
TCGAGAAGCTTTTTCTGAATTTACAATCAGCAGCACTACAACCTGGAGAAAATAGTATATTTCTA  
AAATTCATCCGCATTACAGCGCTACTCAGCGTTAATTGATTCAGAAGCAGGATTAATGATC  
AAAAATTTGTGCCATGAATTGCAGCAAGGTATCTATCTAGACCACCGCTGTAGAGTGGGA  
TAATTTTGTCTCTCATCATCTACCTGTCTGATGAATTTAAAATCGACAGACCCGCCACCGC  
AACCCAGAAGATTATCTGATATTGTTTATCCTAACATGAAATCGCCGCTGGCCAAATGCATT  
AGAGTAGGATATCTACTGAAGAAAACAGAGTCTTCTAAAAGTTTTACTAAAGGTTATTTTGT  
GTTGACTACAAATTTATCTTACGAATTCAAAAGCAGCGATTTCTTTCTAGACAGCAAGTCTC  
CCCGTTCAAAAAATAAACCTGTTGTTGAACAATCAGACATTAGCCGTGTGAATAAGGATGGG  
ACTAACGCTGGCAGTCACCCATCGAGCAAAGGGACACAGGATCCGAAACTGACGAAGAGAAG  
AAAGGGTTTGAGTTCTTCGAATCTATATCTATCTCTAGTTTGTCTTTAAATGATTGCTCAT  
TAAAGGATAGTACTGACTCAACTTTTTGTTTTACAAGGGTATGCTAGTTATCATTACCAGAG  
GACACATGTACAAAAGAATCAAGCAGCACTCAGATTTGGCATGTCCAACAAAGACGCTTGC  
TTCAAATAAGGGCAAACATCAACGTACGCCCTCAGCTCTCTCGATGGTGTCCGTTCCGAAAT  
TTCTAAAGAGTTCTTCCGTGCCAAGGAACAAAAAAGGCTAAAGAAGAAGCTAACATCAAT  
AAGAAGTCAATTTGCGAGAAGCGCGTTGAATGGACGTTTAAAATATTTTCCGCAAGTCTTGA  
ACCAACTCCAGAGGAATCAAAAAATTTCAAGAAATGGGTTCCAGGACATAAAAGCGCTTACAA  
GTTTCAATTCTACTCAGGAGAGGTCGAACTTCATTGAAGAAAAGATTCTGAAAAGTAGAAAC  
CATAATAATGGAAAGAGCTCTCAAAGGTCCAAAACAGTACATATATCACTCCAGTAGACAG  
TTTTGTTAACCTTTCTGAAAAAGTAACGCCATCTTCTCTGTTACCACGTTAAACACTAGGA  
AGAGGGCAAATCGTCCTCGTTATATAGACATCCCAAAAAGCGCAAATATGAATGCAGGCGCT  
ATGAATCCGTATACAGGTCAAAGTCAATACACCAGCCATTGATGAAAATGGTAATCTGGC  
CATAGTGGGAGAAACGAAAAACAGTGCTCCACAAAATGGTATGAGTTACACAATTAGAACCC  
CTTGCAAATCGCCTTATTCACCTTATACTGGGGAAGGTATGCTTTACAACCGGTCAGCAGAT  
AACTTAATGGCATCCTCTTCGCGAAAAGCATCGGCTCCCGGAGAGGTACCTCAAATAGCTGT  
TAGTAATCATGGGGATGAAGCCATTATTCCGGCAAGCGCGTATTCAGATAGTAGTCATAAAT  
CGTCTCGTGCCTCCAGTGTTGCATCCATTCACAACCAACGGGTTGATTTTTATCCTTCGCCA  
TTAATGAACTTACCAGGTGTTTCAACCCAGTTGTCTAGCATTTGGATGGTAATGCAAACGGATA  
TTTTGGAATACCATTGAATTGCAATTCGGAAGCAAGACGAGGGTCAGATCTTTTACCTTTTG  
AGATGGAGTCTCCATTGTTTCGAGGAAAACAGAACTCAAACTGCAGTGGCTCTCGAAAAGT  
TCAGCTTGTATATTTCCCATCAATGTGGTCCAAGGAAAAGGTAATGACTCACGATTGAT  
CTACGGCAATGAGAAGGGCGCTCACAATCACGTCTAACGTTGAAGGAACCGCTTACATCTA  
AAGGTGTTGAAGCTCCTTATAGCAGTTTGAAAAAGACATATAGTGCGGAAAACGTCCCACTA

ACATCTACTGTATCGAATGATAAGTCTCTTCACTCGCGCAAGGAGGGAAGTACTAATACTGT  
ACCTGCTACATCCGCGTCAAGTAAGTGA

>YDR163W 0.82 Cold

ATGACCACATCACACAGACCACAGTTAGAAGCAAGAAGCGGTGCAAAAAGCGGCCGCTTATAC  
ACCAACAGGCATCGAGCATGCCAGATTACTACCAGGACATACAACATTAAAATACAGGAAAT  
TTAAAGAGGAGGAAAATCTTAGAGCAAACGTGCGCAAGAAGATAGGAGCAACGATAAAATCT  
TTAGAGGAGGCAGTAATGAACGAAGAGAAAACAGGATGTTGTGGGGAGTGGGAACCTCCAAGA  
AACCCGCAGTGAGAAAAGACCAAAAAGACTCGTTGCAAGAGCTGCTGGTTACTCAAAAAATA  
AAGTGGAAGATAAAGCAGAGCTTGAAGGAAATGAACAATTAAAGGGAGGAAATTCGTCTAGG  
CGATCGTGGAGAAAAGGCGACGGCGTTTGGACGCCATAAAGTAACCAAAGAGACAAATATTA  
GGAACATGCAACAAAAAATCAGCGTCCGGATACATTAACGATATGACAAAATCTGAATATC  
ATCAAGAATTTCTCCATAAGCATGTTAGATAG

>YLR115W 0.77 Cold

ATGACTTATAAATAACAATTGCTGTGATGATGGATCAGGAACCACCGTTGGTTCAGTGGTACG  
ATTTGATAACGTCACCTTGTTAATCGATCCCGGTTGGAATCCATCTAAAGTATCGTATGAGC  
AATGCATCAAGTACTGGGAAAAAGTGATACCGGAAATTGATGTAATAAATACTATCACAAACA  
ACAATTGAATGTTTAGGTGCTCATTCCCTTCTGTACTATAAATTTTACCTCGCATTTTCATATC  
CAGAATTCAAGTTTACGCAACTCTTCCTGTTATCAACTTAGGGAGAGTTTCCACCATAGATT  
CATATGCATCTGCAGGTGTTATAGGTCCATATGACACAAAATAAACTCGATCTTGAAGATATT  
GAGATATCTTTTGATCATATTGTACCTTTGAAGTACTCGCAATTGGTAGATCTACGATCAAG  
ATACGATGGATTGACTTTACTGGCGTACAATGCTGGTGTGTGTCCAGGTGGTTCTATTTGGT  
GCATTAGCACATACTCAGAGAAAATTGGTTTTATGCAAAGCGATGGAACCACACTAGAGATAAC  
ATACTAAATGCTGCTTCTATATTGGACGCCACTGGTAAGCCCTTATCAACTTTGATGAGGCC  
CTCTGCAATAATTACTACTTTGGACAGGTTTGGCTCCTCTCAACCGTTTAAAAACGTTCAA  
AAATCTTTAAAGATACATTAAGAAAGGTTTGAAGTTCGGATGGGTCCGTTATAATACCGGTA  
GATATGAGTGGCAAATTTCTGGACCTGTTTACACAAGTTCATGAGTTATTATTTGAAAGCAC  
AAAGATCAATGCGCACACACAAGTACCTGTACTTATTCTGTCTTACCGGAGAGGAAGAAGTTC  
TAACATATGCCAAATCAATGCTCGAGTGGCTGTCCCTTCACTACTTAAGACATGGGAAAAC  
AGAAATAATACTTCTCCATTTGAAATTGGATCACGGATCAAAATCATCGCACCAAACGAATT  
GAGTAAATATCCTGGTTCAAAGATTTGCTTCGTATCTGAGGTAGGAGCTTTGATTAATGAAG  
TGATAATTAAGTTGGTAATTTCTGAGAAGACAACCTTGATTTTGACCAAGCCGAGCTTTGAA  
TGTGCGTCTCTTTAGACAAGATACTAGAAATTTGTTGAACAAGATGAAAGAAATTGGAAAAC  
ATTTCTGAAGATGGTAAATCATTCCTCTGCGATAATTACATTTCAATAGACACCATAAAAAG  
AAGAACCCTTGAGTAAAGAGGAAACAGAGGCGTTTTAAAGTACAGCTTAAAGAAAAGAAAAGG  
GACAGAAATAAGAAAATTCTACTGGTGAAGAGAGTCTAAGAAACTGGCTAACGGCAACGC  
AATCATAGATGATACCAACGGAGAGAGGGCAATGAGAAATCAAGACATTTTAGTGGAAAACG  
TCAATGGAGTACCACCGATTGATCATATTATGGGGGTGACGAAGATGATGATGAAGAGGAA  
GAAAACGACAATTTGTTGAATTTACTCAAGGATAACTCTGAGAAATCAGCAGCGAAAAAAA  
TACGGAAGTTCTGTAGACATTATAATTC AACCAAGTGCCGCTTCAAACATAAAATGTTCC  
CATTTAACCCCGCTAAAATCAAGAAAGATGATTATGGTACTGTTGTAGATTTTACGATGTTT  
TTACCTGATGATCTGACAATGTTAATCAAAATAGCAGGAAAAGACCTCTCAAAGACGGTGC  
TAAAACCACGAGCCCTGTAAACGAAGAAGATAACAAAAATGAAGAAGAAGATGGTTATAATA  
TGAGTATCCAATTAGCAAAAAGGAGCAAAACACCGTGCTTCTCGTTACTCGGGATTTTCTGGA  
ACCGGAGAAGCAGAAAATTTTGATAACCTTGACTATTTAAAGATAGACAAAACGCTCTCCAA  
AAGAACAATCTCAACTGTAAATGTCCAATTGAAATGCTCCGTAGTAATCCTAAATTTACAGA  
GTTTAGTTGATCAAAGGTCTGCATCTATTATATGGCCATCGCTAAAATCTAGAAAAATAGTT  
CTTTCGCCCCCAAACAGATTCAAAATGAAGAAATTACGGCAAACTTATCAAGAAAAATAT  
TGAAGTGGTCAACATGCCATTAATAAGATAGTGAATTCAGTACAACAATAAAGACCCCTGG  
ATATCTCCATTGACTCCAACCTCGATAACCTTTTGAATGGCAACGTATCAGTGATAGTTAT  
ACAGTTGCCACTGTCGTTGGCAGGCTGGTTAAGGAGAGCCTACCGCAAGTGAACAATCATCA  
AAAAACAGCGTCAAGGAGTAACTAGTCTTGAACCATTACACGGTTCATCTAGGAGCCATA  
AAACAGGTGCGTTGTCAATCGGTGACGTTAGGTTAGCACAAATTAAGAAAATCTCACAGAG  
AAAACTACATTCAGAAATTTAAAGGGGAAGGTACTTGTCAATAAATGAAAAGTAGCAGT  
CCGCAAAATCAATGATGCAGAACTATTATCGATGGTACGCCTTCCGAACTTTTTGATACTG  
TCAAAAAATTTGGTTACGGATATGTTAGCAAAAATCTAG

>YDL063C 0.78 Cold

ATGGGCAGATCAAAGAAAAGATCAAGAGCATCTTCGTCTCGATTAAATCCACTACGCAAAGC  
 TGGGTCAAATGACAATAATAAAGATACCAACGTCGTTAATAAAAACTCCAGCCGCTATTGC  
 AGAATTTGTCAAGTGTGGTGCCTAATGATAGAAGTATTGCTTTGAGTTCCATCAGTGTCTT  
 TGTGAGGATGCACATATGAGACAACCTTTACTGAAAGAGAAATTAGTTCCATCATTGAA  
 TAAATTGCTGAACGATTCTAATTCGGACATAGTTGTGGAGTCGTTCCGGCTTATTAAGGA  
 ACTTGCTTTGGAAGAAGTTATGATGTGTCAATCTACCTTTGGAGATCTGATATATGGACAAGT  
 ATAACAAGTAATTTTGGCAGGATTGTTGAAATCGTTATCCGCTTTGCAAGCAGCAGAACAGCA  
 ACCGCAGCTAAAACCTGCAGGAAAATCCAAAATAGAATCTAAAAGGTTGTTATTTCGATTTT  
 GCGATAACTTACTGTCGTTAGTGGTGGCTCTGTCTAATGGATCCGACGATATTCTTAATGAG  
 ATATTAACGAAAAGTAAAATAAATGAAATTTTTCAGGTCATTTACAGCTATTAATAATGAG  
 TGTCGAGAAACTGCCAATTAATCTGTTCAATACCACTCTTGATCTCATTATGATTTGAGTT  
 CCGAATCATTGAAATTTATTGATCATGTTTCCAACAATGAACTTCTATCACAGTTCTTAAAT  
 GGGCTATCTCCGGCTTTACATCCACAAGCTAATGAATTAACAAAAGTTCTAATTGAAGGTAT  
 CCATTGCCAATTCCTTGACATGAAAATAACTTATGATCAATGTAACAAAATGATCCACTCTG  
 TATGTCATTCCATTAATAACATTGATCCAGTACAGTTAGTTAATGACATTAATAACCTTGTA  
 GAAATTGGACCTGCTACTAGTAAAGATGAAAGCAGTAAGGTTATAACTAAGATCAAGGATTA  
 CAATGCGAAACGTAACGAATCCATGATAAAAATGCAAAGCATTGAAATAGCAATTGATCTTA  
 TCACCGCAATCATTGAGATAGTTGCATCCAAAATATGAATCACCAGAATCACAGGAAGTAGCA  
 ATTCCAGAGGAGCTAATCAATACCTTAACAAAATTTCTTACCTCACGTTTTTCATGATTTT  
 GAAAGATACCTTACCTCGCGAATATTGATCGGATGGAACAATCTGATCTGGCTCTTTGTGTC  
 TCTCTAACAGAGCTCTCTGGAGAGTTGTTAACACCTTATGGAGTTATGTTACACAGTTG  
 GACAGCCAAGATGATTTGAGTATTAATAATAGGAAGAATGGGCTGTATTTGGGCGCTTCTGAA  
 ACTCATCTTTCTGATGGAGCGTTTGAAGTGAGAATCGAGCATTGATCAATGTCCAAAATGC  
 TGAACAATTCAGGATTCGCTAGGGGAATTATTGAAGAGTTCCAAAATAATAATGACCTTGAG  
 TTACAACAAAATGTATTAATGTACTAAGCACATATGCTATGATTCAGGGACAAATTGATGC  
 AAATAAGGAGATTGGGCAGTTCTTCATACAAAATTTAACACAGTTGAATGTTCCGCCCTGAAA  
 TTTTGATAGAAATGACAAATTCGCTTTTTCCAAATTTACGGGGATGCCTCTTACGACTATAAT  
 GAACCAATATTTGTAAGGGGTGGATTTTTTATCTATTCTAAAAGACCAAGTTGTACCAAATTT  
 GAGGCAGCAATTCAAAATGGTTGATAAAAACAAAATCCCGAACTAAAAGAAAGATGCCATG  
 ATTGCTTTACTACGTTGGATAGTTTCATTCACTACAAAATGAATGAAAATCTACTAACCAA  
 TAG

>YIR009W 0.8Cold

ATGGTTGAACCAGCAAGGAAAAAGCAGAGGATTGATCGCGATACTCATCACACTGTGGCTGA  
 ACCAGTAACGGAAGCTAAAAATACGCTGTACGTGAGCCAGCTTAATGAAAAAATTAATATGC  
 AACGACTGCGAGTAAACCTTTTTTTGCTCTTTGCTACGTTTGGAGAGGTACTGAAGGTTAGC  
 ATGAATTTCAAGAAACAGCGGGGCCAAGCCTTTATCACCATGAGAACCATCGACCAGGCCAG  
 TCTGGCCCAGATTTCAATTAACGGCGAGCGATTCTTTGGTAAGCCTTTGAAAGTTGAGTTCA  
 GCAAGAGTGAAACTAAAACACTATGA

>YOR018W 0.68 Cold

ATGTTTTTCATCATCATCTCGACCTTCAAAGAGCCATTACTATTTGACATCAGACTTAGAAA  
 TTTGGACAATGATGTTTTACTGATAAAAGGCCCCCTGATGAGGCATCTTCTGTCTACTAT  
 CTGGAACATAGTATTGTCAATTACTGAGCCAATTCAAATCAAGTCTTTGGCTTTGAGACTT  
 TTTGGTAGGTTGAGACTAAATATTCCAACGGTTTTACAACTGTTTCATGGCCGCATAAGCG  
 ATACTCAAAGTTGAGAGAAACATATATTCTCATTTTTTGGGATGATTTAATATAAAAAGTT  
 ATTTCCAAAACCTGTACGATAATCATAATAATGGTAAAATAACAATTTCTAGTAAATCCTCA  
 ACAATTTAGCAGCATTGCCAAAGAGAAAAAGAGCCCTTTCTACTGCATCATTGATATCAAG  
 TAATGGGCAGACAAGCGCAAGCAAAAACATCACACCTTAGTAAAAGGTAACACTACGAATTC  
 CTTTCAGCGCGATTATTCTCTGGGTCATTAGTGGAAAGTGTAGAAGGCCTACCAAATGCTGCC  
 GTCATTATGCTCTGGAAGCTACTATCGAGAGACCTAAGCAGCCCGACTTGATCTGTAAAAA  
 ACATCTAAGAGTTATTGCAACGTTAGCTATAGATGCAGTCGAGTTATCTGAAACAGTATCAG  
 TGGATAACTCATGGCCTGAAAAAGTCGATTATACGATCTCCATTCAACTAAGGCAATTGCC  
 ATTGCTCTTCCACCATGATCAATATTTAATTTGTTTCTATATTAAGGATTGAAGTTAGG  
 CCCTGTTAGGATCAGTTTGGTGGAAAATTCACAGTATTGTGGTAGCTATGGAGGGGTTATCA

ACCAAGAAAGAATGGTGGCTAAATTTAAAACATAAAGATCCCCTGAAGCACGTTGCCCAAATA  
 AAGAAGAAGAGGAGCCTAAATGAAGCTGCCGACGAAGGGTTGATACGGACACAGGGGAATT  
 TCAAGATAAATGGGAAGTTCGAGCTTTATTTAAACATACCTGCAAGCCTGACTAAATGCTCCC  
 AAGACTGTGCGATTTTATCTAATATCAAAGTCCGTGATAAGATCAAGTTCACTATAAGTTTA  
 CTCAATCCGGACGGTCATATTTTCAAGATTTGCGTGCGGCACTGCCTGTCCAATTATTCATTTT  
 ACCGTTTGTTCAGTCAATGTAAAGACCTCCGATGTTATTGAAAGAACGCTCAAAAACGTTTG  
 GACCCTCATATCAAGTAACAAGTCAGCACGATAATTCATTCAGCAGCAAAAACCTTTGTAGAC  
 GATAGTGAAGAAGATGTGATTTTCAAGATCTGCTTCTGCGTTACAATTGTCTTCAATGCC  
 AACCATAGTATCTGGCTCTACTTTAAATATCAATAGTACTGATGCAGAGGCTACCGCAGTCG  
 CTGACACAACATATGGTAACTAGTTTGATGGTACCTCCCAACTACGGCAATCACGTTTACGAT  
 CGAGTGTATGGCGAGGTAACATAATGAAGACGAACTTCAGCATCAGCTTCTTCAAGTGCCGT  
 CGAATCACAGGCAATTCACAATATTTCAAAAACCTATATATATCGGATAGTAACAATAGCAATA  
 ATCCTATTTTGGCACCAAATCCTCAAATCAAGATTGAAGATGATAGCCTAAATAATTGTGAC  
 TCTCGAGGGGACAGCGTTAAACAATAGTAACCTGAATCTGGTAAATAGTAATCTAACAAATTAG  
 TGAAAATTGGAACAATAACTCTCCTTCTGCAAATAGATATAATAACATCATTAATGCTGGAT  
 TGAATAGTCTTCACTGACACCAAGCTTTGCACATTTATCTAGGCGTAACTCATATAGTCGC  
 CAAACATCTTCTACATCGCTGAAGAACGATTTGGAACCTGACAGATTTAAGCAGAGTTCCCTC  
 GTATGATAAAGCAATGAAATCTGATATGATTTGGTGAGGATCTTCCACCGGCTTATCCCGAGG  
 AAGAACTTGGAGTTCAAGAAAAATAAAAAATTTGAACTAGAAAGGCCACAAATCTTTCATCAC  
 AAGTCTACATCCTCTTTTGTGGCACTTCCAGGCTCGAGCAAGAGTTCCAATAATCTGAAAAG  
 ATCGTCTAGTAGGACACATTTATCCCCTCTCCATTACCAAGGAATAATAGCGGATCCTCAG  
 TATCATTGCAGCAGTTGGCGAGAAACAACACAGATAGTTCATTTAATCTAAATCTCTCTTTC  
 ACTTCAGCAAAAAGCAGCACAGGAAGCAGACATTTTCCGTTTAAATATGACAACATCTTTCAC  
 TAGTAATTTCAAGTTCCAAGAACAAATTCACATTTTGGATAAAAACCTGATTCTACATCTGACGCTA  
 ATAAGCCAAGAGAAGAGGAAAACTATACGAGCGCAACCCACAATCGAAGGTCACGCTCATCG  
 TCAGTTCGGAGCAACAATAGCAACTCACCATTAAGACAAGGAACAGGTTCAATTTGCTAATTT  
 AATGGAGATGTTCAAAAACGGGATCGCTCATAG

>YIR029W 0.69 Cold

ATGAAGTTTTTTTAGTTTTGGCAGATGAGGCAGAATTTAAGTCAATAATCATTTCAAAAAACAA  
 AGCAGTAGATGTTATAGGATCTAAGTTAGGTGGTCAAGTGGTTTTCTTTTTCAGATGAATGGT  
 TTGCTTCTGCTGAAAATTTAATTCAGCCAACCTGCTCCTATAAGGGATCCTACCAGATTTGTT  
 CATTTCAGGCGCATGGTACGACGGCTGGGAAACACGAAGACATAATGAGATGGAATACGATTG  
 GTTATCATCAAGATGGGAGTCTGCTGCTGCCCATATTATTGGTGGTGAATTTGACACTGCGT  
 TTTTCAATGGTAATCATGCACCATTTGTATCAATAGAGGCGCTCTATGACGAGGGCGAAGAA  
 GGTAATATAGTGAAGATGACTCGCGTTGGTTGAGATTGTTGAGAAAATTTGAGTGTGGTCC  
 TTCGCAAAGGCATCTTTTTCGTTAGAGGCAACGGCCTTACTAAAGAAAGGTTTACTCACATCA  
 AGCTGAAGATGTACCCCGATGGAGGAATCGCCAGATTTAGATTATACGGAAGAGTTGTTCCCT  
 CCAGAACTCAAAACGAAGGATCATATAATTGACTTTGGCTTATGTTTGAATGGTGCTGTGCG  
 TTTAAAGTATTCTGACCAACACTTCGGTTTCAGTTGATAAATTTGCTACTGCCAGGTCGAGGTC  
 ATGATATGTCGGACGGCTGGGAAACCAAAAAGATCGAGACAACCAGGTCATACTGATTGGGCG  
 GTAATTTCAACTGGGCAGGGAGTCTTCTTTTCATTGAGAAGATTATTGTTGATACGGCACACTT  
 CAGGGGAACTTCCCTCAGTTCATTACCGTGGAAGTTGCTTGAAGGAGTCAGAATCAAGTG  
 AGAACACTGGTGAAGGAACATGGGTAGAGCTAGTTGGTAAGTCAAAGACGGGGCCTGACAAA  
 GAACATGTGTATGAAATACGTAAGAGTATAAGAGTCTCCCATGTCAAATTAACGATTATTC  
 AGATGGAGGAGTGAAGAATAAGAGTTTGGGGGTACTGA

>YKL048C 0.78 Cold

ATGTCACCTCGACAGCTTATACCGACATTAATTTCCGGAATGGGCACCATTATCCCAGCAATC  
 GTGCATAAGAGAGGATGAGTTAGATAGTCCCCGATAACGCCTACGAGCCAGACATCTTCAT  
 TTGGTTCTTCTTTTCTCAACAGAAACCAACCTATAGTACAATTATAGGAGAAAATATACAC  
 ACGATCCTGGATGAAATTCGACCATATGTGAAAAAAATAACTGTTAGTGACCAAGATAAGAA  
 AACTATAAACCAATATACGCTAGGAGTCTCTGCAGGAAGTGGACAATTTGGTTATGTACGAA  
 AAGCGTACAGTCTACTTTAGGCAAGGTTGTTGCTGTCAAGATTATACCAAAAAAACCTTGG  
 AATGCCAGCAATATTCAGTAAATCAAGTAATGAGGCAAAATCCAGCTTTGGAAGAGTAAAGG  
 AAAATAACGACAAATATGAGTGGTAATGAGGCTATGAGACTTATGAATATCGAAAAATGTA  
 GGTGGGAAATTTTTCGCGCTTCAAGACTTCGAAATAATGTTTCATATTGTGCGACTAATAGAA

TGCTTGGACTCTCCTTTCAGCGAATCTATCTGGATAGTCACTAATTGGTGCAGCCTTGGTGA  
 ACTACAGTGGAAACGTGACGATGATGAAGATATTTTACCGCAATGGAAAAAATTGTGATTT  
 CAAATTGTAGTGTTTCTACATTTGCCAAAAAATCCTGGAGGATATGACAAAAGGGTTGGAA  
 TATTTGCATTCTCAGGGTTGTATTCATCGTGATATCAAACCGTCCAATATTTTATTGGATGA  
 AGAAGAAAAAGTAGCGAAACTTTCTGATTTTGGAAAGTTGTATTTTCACTCCCAATCATTAC  
 CTTTCAGCGATGCTAATTTTGAAGATTGTTTTAGAGGGAATTGAACAAAATTGTTGGTACT  
 CCGGCATTTATTGCACCAGAGCTATGTCATTTGGGCAATTCCAAAGAGATTTTGTGACGGA  
 TGGCTTTAAGTTGGATATTTGGTCATTGGGAGTGACACTATACTGCTTACTGTACAACGAGC  
 TGCCATTTTTTCGGGGAAAATGAATTCGAAACCTACCACAAAATCATCGAAGTATCATTGAGT  
 TCCAAAATAAATGGTAATACTTTAAACGATTTAGTCATTAAGGTTATTGGAGAAAGACGT  
 TACTTTACGCATAAGTATTCAGGATTTAGTAAAGGTTTTGTGCGGTGACCAGCCATAGATT  
 CTAGGAATCACAGTCAAATTTTCATCGTCCAGTGTGAACCCCGTAAGAAACGAAGGTCTGTGA  
 AGAAGATTTTTTGGTAGGCTACTGACTAAAAAAGGAAAGAAAAAGACCTCAGGAAAAGGGAA  
 AGACAAGGTATTGGTATCTGCAACTAGTAAAGTAACACCTTCGATACATATCGACGAGGAAC  
 CGGATAAAGAATGTTTTTCGACTACGGTCTTAGATCTTCGCCAGACTCGAGCGATTATTGT  
 TCATCGTTAGGGGAGGAAGCCATTCAGGTTACGGATTTCTTAGATACTTTTTGTAGGTCAAA  
 TGAAAGCTTACCTAATTTGACTGTGAATAATGATAAGCAGAATTCGGACATGAAAACGACA  
 GAAGCGAGTCATCCTCTCATTCGTCATTGAAAATCCCAACACCTATCAAAGCCATGATAAGA  
 CTAAGAGTTCCCTAAAGAGAACGGGAACAGAACCATATTAATTGCTCACAGGACAAAACC  
 GAGTTCCCACTAATGGATAGGACTGTTGGAAAGCGCACGGTTAACAATTCAGGGGCTAGAA  
 AGCTTGCTCATTCAAGTAATATTCTCAACTTTAAAGCATAACATAAATTCGGAAGATAGTGAC  
 ATTCGAGAAACAGTAGAAGATGTA AAAACGTATCTGAACTTTGCAGATAATGGTCAAATATA  
 G

>YBR298C 0.72 Cold

ATGAAGGGATTATCCTCATTAATAAACAGAAAAAAGACAGGAACGACTCACACTTAGATGA  
 GATCGAGAATGGCGTGAACGCTACCGAATTCACCTCGATAGAGATGGAGGAGCAAGGTAAGA  
 AAAGTGATTTTTGATCTTTCCCATCTTGAGTACGGTCCAGGTTCACTAATACCAAACGATAAT  
 AATGAAGAAGTCCCGACCTTCTCGATGAAGCTATGCAGGACGCCAAAGAGGCAGATGAAAG  
 TGAGAGGGGAATGCCACTCATGACAGCTTTGAAGACATATCCAAAAGCTGCTGCTTGGTCAC  
 TATTAGTTTCCACAACATTGATTCAAGAGGGTTATGACACAGCCATTCTAGGAGCTTCTAT  
 GCCCTGCCTGTTTTTCAAAAAAATATGGTTCTTTGAATAGCAATACAGGAGATTATGAAAT  
 TTCAGTTTTCTGGCAAATCGGCTCTATGTCTATGCTACATGGCAGGTGAGATTGTCGGTTTGC  
 AAATGACTGGGCCTTCTGTAGATTACATGGGCAACCGTTACACTCTGATCATGGCGTTGTTT  
 TTTTGTAGCGGCTTTCATTTTCACTTCTGTATTTTTGCAAGAGTTTGGGTATGATTGCCGTGGG  
 ACAGGCATTGTGTGGTATGCCATGGGGTTGTTTCCAATGTTTGACCGTTTCTTATGCTTCTG  
 AAATTTGTCTTTGGCCCTAAGATACTATTTGACGACTTATTCTAATTTATGTTGGGCGTTC  
 GGTCAACTTTTCGCTGCTGGTATTATGAAAAATCCCAGAACAAATATGCCAACTCAGAACT  
 AGGATATAAGCTACCTTTTGTCTTTGCAGTGGATCTGGCCCCTTCTTTGGCGGTAGGTATTT  
 TTTTGTACCAGAGTCTCCATGGTGGCTGGTTAAAAAAGGAAGGATTGATCAAGCGAGGAGA  
 TCAC TTGAAAGAACATTAAGTGGTAAAGGACCCGAGAAAGAATTACTAGTGAGTATGGAAC  
 CGATAAAATCAAAC TACTATAGAAAAGGAGCAGAAAATGTCTGATGAAGGAAC T TACTGGG  
 ATTTGTGTGAAAGATGGTATTAACAGGAGAAGAACGAGAAATAGCTTGT TATGTTGGATCGGT  
 CAATGCTCCTGTGGTGCATCATTAATTGGTTATTCAACTTACTTTTATGAAAAGCTGGTGT  
 TAGCACTGATACGGCTTTTACTTTTCACTATTATCCAATATTGCTTTGGTATTGCTGCAACGT  
 TTATATCCTGGTGGCTTCAAATATTGTGGCAGATTTGACCTTTATGCTTTTGGGCTGGCT  
 TTTCAGGCTATTATGTTCTTCAATATCGGTGGTTTAGGATGTTT CAGACACTCATGGCGCTAA  
 AATGGGTAGTGGTGCTCTTCTAATGGTTGTGCGGTTCTTTTACAACCTCGGTATTGCACCTG  
 TTGTTTTTTGCTTAGTGTCTGAAATACCGTCTTCAAGGCTAAGAACC AAAACAATTATTTTG  
 GCTCGTAATGCTTACAATGTGATCCAAGTTGTAGTTACAGTTTTGATCATGTACCAATTGAA  
 CTCAGAGAAATGGAATTGGGGTGCTAAATCAGGCTTTTTCTGGGGAGGATTTTGTCTGGCCA  
 CTTTAGCTTGGGCTGTTGTGCTGATTTACCAGAAACCGCTGGCAGGACTTTTATTGAGATAAAT  
 GAATTGTTTAGACTTGGTGTTCAGCAAGAAAGTTCAAGTCGACTAAAGTCGACCCTTTTGC  
 AGCTGCCAAAGCAGCAGCTGCAGAAATTAATGTTAAAGATCCGAAGGAAGATTTGGAAACTT  
 CTGTGGTAGATGAAGGGCGAAACACCTCATCTGTTGTGAACAAATGA

>YNL267W 0.79 Cold



ATGCATAAAGCATCCAGTTCAAAGAAAAGCTTTGATGATACTATTGAACTAAAAAAAATGA  
 ACAATTACTGAAACTGATCAACTCTAGTGAAATTCACCCTTCACAATTGTGTGGAGTTACTGT  
 GCAAACACTCCGAAAATATTGGTATACATTACTATTTATGTCAGAAATTGGCCACATTTCT  
 CACAGCGAACTACAGTTCTATATTTCCCAACTAGTACAGGTCCTCGTCACCATGGAGACAGA  
 ATCAATGGCTTTAGAAGATTTACTATTAAGGTTGAGGGCGGAAAACCTCATTTTGCCTAC  
 TGACGTTTTTGGCAGTTACAAGCGTTACTAACGGATTTATCTACTGACCCCGCTTCTTATGGC  
 TTCCAAGTGGCTAGAAGAGTCTTAAACAACCTTACAAACCAATCTCTTTAACACAAGTTCAGG  
 TAGCGATAAAAAATGTTAAAATACATGAAAACGTTGCACCGGCCTTAGTTCCTTCTCTATGA  
 TAATGTCGGCTATAGCATTCCCCCAATTAAGCGAAGTGACCAAACCATTAGTGGAACTCTCAA  
 GGTAGAAGACAAAAGCTTTTCGTTTTTAAAGTTGGCTAGAAGTGCAATGAAAGATTTTACCAA  
 GAACATGACCTTGAAAATACCTACTAAACAAGAAAACCTCCAGATCCAAAAGAGTTAGCT  
 CAAATCGCAGTTCAACTCCGACTTCTCCAATAGATTTAATAGATCCAATAAAAACTAAAAGAA  
 GATGCATCCTTCAGGAAATCCAGACATAGTGAGGTAATAATGGATTTTCGACATTGTGGATGA  
 TATAGGTAACCAGGTCTTTGAAGAAAGAATCTCATCTTCAATCAAACCTCCAAAACGTAAAC  
 CTAAGTATTTGGATAATTCATACGTTTCATAGGACATATGATGGCAAAAAATATAAACAGGGAC  
 GGAAGCATTTCAAAATACCGCAAAGGCTCTCGATGGAAAATAAAGGTGATTATATTTCTCCAAA  
 GGGACGTAATGATGAAAATAATGAGATTGGTAACAATGAAGATGAAACTGGTGGTGAACCGG  
 AGGAGGACGCGGACGCTTTAAACTCTGATCACCTTACCAGTTCTATGCCAGATCTGCATAAT  
 ATTCACCAAGGACTTCTTCTGCTTCATCTGCTTCTTTAGAAGGGACACCTAAGTTAAACAG  
 GACCAATTTCCCAACCCCTTTTCGCGCCAGGCATTCAAAAACAGTAAAAAAGCGAATTCTTCTT  
 TGAGTCAAGAAATTGACTTGTGCGCAATTATCGACCCTTCAAAAAATAAAAAATGTTAAAAGCA  
 AATTATTTTTCGTTGCGAGACACAATTTGCCATTGCGCTAGAAAACAATATCTCAAAGGCTAGC  
 TCGAGTACCGACAGAAGCTAGATTGAGTGCCTTACGAGCCGAGTTGTTTCTATTTAAACAGGG  
 ACCTACCAGCGGAAGTAGATATCCCCACTTTATTGCTCCAAATAAAAAAGGAAAGTTACAT  
 AAATTAGTGACCATTACTGCTAATGAGGCACAAGTTTTTGAACCTCTGCAGAAAAAGTTCCATA  
 TTTACTCCTGATAGAATACTTGAGAGACGAATTTGATTTTGACCCAACAAGTGAACCAATG  
 AAAGATTATTAAGAAGATCAGTGGTAATCAGGGAGGCTTGATATTTGATTTAAATTACATG  
 AATAGAAAAGAAAACAACGAAAATAGAAATGAAAGTACTCTTACTAGCAACAACACTCGATC  
 TTCGGTATATGATAGTAACTCGTTCAACAACGGGGCTCCCGCAATGAAGGTCTATCCAGTA  
 CCTCAAGAAGTGATTCAGCGTCCACAGCTCATGTTAGGACTGAAGTCAATAAAGAGGAAGAT  
 TTAGGTGATATGTCAATGGTAAAAGTCAGGAACAGAACGGATGACGAAGCGTATAGAAATGC  
 TTTAGTAATACAGAGTGCCGCAAATGTTCCAATTTTACCTGATGATAGTCAAGACAGAAGCC  
 CAGAGTTGAACTTTGGCTCAAACCTTGACGAAGTACTCATCGAGAATGGAATTAATAGCAA  
 AATATACATAGCCAAACTGACGCTTTAGCAGACCAGATGAGAGTTTCAGCTGTTATGTTAGC  
 ACAATTTGGATAAGTTCGCCACAACAGTTATCAGAAAGTACCAAACAATCCGCGCTCAAATTA  
 TTTTATCAATGAAGGAGGTGCAGGATAAATTTGGTTACCATGATTTGGAAGCCCTTCATGGA  
 ATGGCAGGTGAGAGAAAATTTGAAAACGATTTAATGACGGGTGGTATTGACACTTCATATCT  
 AGGTGAAGATTGGGCTACCAAGAAAGAGAGGATACGTAAAACCTTCGGAATATGGCCATTTTCG  
 AAAACTGGGATTTATGTTCTGTAATCGCCAAGACGGGTGATGATTTGAGACAGGAGGCGTTT  
 GCATACCAGATGATTCGAAGCGATGGCCAATATTTGGGTTAAAGAAAAAGTTGACGTTTGGGT  
 TAAAAGAATGAAAATTTTAAATTAATTAAGTGCGAATACGGGACTTGTGGAGACCATCACAAATG  
 CTATGCTGTGCATAGTATTTAAAAGGCTTTAACCAAAAAAAATGATTGAAGATGCAGAACTA  
 GATGACAAGGGTGGTATTGCCTCTTTGAATGATCATTCTTTCAGAGCTTTTGGTAATCCTAA  
 TGGATTTAAGTATAGAAGAGCACAAAGACAACCTTTGCTTCTTCGTTAGCCGCATATTCTGTCA  
 TTTGCTATCTCTTGCAGGTTAAAGATAGACACAACGGTAACATTATGATCGATAACGAAGGC  
 CATGTAAGTCACATCGATTTTGGATTTATGCTATCAAATTCACCCGGCTCAGTGGGCTTTGA  
 GGCCGCACCATTCAAATTAACCTTACGAATATATTGAACTGCTAGGCGGAGTAGAGGGAGAAG  
 CGTTTAAAAGTTTGTGTAACCTAATAAAGTTTCGTTCAAGGCTCTGAGAAAAGTATGCTGAT  
 CAAATCGTATCAATGTGTGAGATTATGCAAAAAGGACAATATGCAGCCTTGTTCGATGCTGG  
 CGAACAAACAAGTGTACAACCTACGACAAAGGTTCCAATTGGACTTATCAGAAAAAGAAGTTG  
 ATGACTTCGTAGAAAATTTCTTGATAGGTAAATCTTTGGGTAGTATTTACACCAGAATATAC  
 GACCAATTTCAACTTATTACACAGGGTATATATAGCTGA

>YDR239C 0.75 Cold

ATGTTTGATGGCTTTAGCAACAATAAAGGTAAACGAAGGTCTTTTTTTTCGGTTTGGTCTGA  
 AAGTAAAAACAATGACTCTGAAAATCCGTTAGAAAGCCATCGGTGCCCTCTACAATAAAGA  
 AATCAACAAATATCGCACGAACCTTCGACGGCTGAAACTTCTGCCCTGATATACCGCCAAGA

AGTCCAAATAGGAATGCTCATAGCAGGAGCCATTCTATCCAGGCACCATTACAAAAGGAAAC  
 ATTAAAGAATACTAATCCATTTTTGAATGCTGAGGATACCTTAGGAGATTCTCTTGAATTAA  
 CACAGTCCAAGGAAGCGTCAGGAAACGATCACAAAGGAATTGAATATTTACAAGAAAACAAC  
 ATCATTTGGGCAGAGAACCAACCCCTTCACAACAAGCGCAAATTCAAATGCACATTTCTCCAA  
 GATAAAACGTTTCGAGGCCTCCACCACCGCTATGGACATGAAGTCAATAACAACGTCAATAA  
 GCAACAATACTACTAAGGAAGAAATAGAGAGTAATAATGATTCTGAGCGGGATAGTATTGCA  
 ATCTCATCCACCACAATCAACATAGGCGGCAGCGTTCAGAAGCAGAAAAGTTGGTAGATGA  
 TATTGAAAATTACATTAATGAACACAAGGTAAGTTCGGTAGCTCACTATCCCTAGACACGT  
 CTGAAAACCTCAGATACTAAAGCATCGCAAGATAAGTTGCCAGTAGATGTCATGGAAGCTCCC  
 ATTTTGAGAAATGTCAGCGCGGAGAGTTCCTTAAGCTACGTAAAACCCTTATTGTGGATAA  
 TGAAGAAGTAAATAAAGCAAGTAACGGAAATTTAGTACAATCAGATCATCTAAAAGAATTTT  
 CTTCGAATCTGGATGATGGGGATGATAAATTTTCCTTTAGTACATCGGCTAGTGGTAAATCC  
 ACCAAAAGCCTTCAGCAAGTTTCTAAAGACGAATCTAGTGGTTTTAAAGCTGCACATTTTGA  
 TTTTGCATATAAATCAAATGAGCACCTTGGGAGTATGGAAGTATTGCAAGCGCCAGAAAGC  
 CTCTGCGGATAACTAATGAGATTGATAGCGGTTCTTCCAACGAGGATGATGATGATGGTCTT  
 CAGGAAAAGGTTTTGTGGATAGTGAAAGTAAAGCATTATAAATTACGCAAGTATCAAGG  
 CTCATCTATAAAAAATGACGCTCTCAACACAAGAGCCTGAGTTACCAAGTCATCGTAGAATAT  
 TTAGGGTGGTTAATGAAGATCGCCCTAGTTTCTATTTAAATAGTGTAAACGATACGGGCAGT  
 CTAACCGACAAGCATTCTTTTGACACTGCATCATCTGGTGGTATGATGCCAAGTCAAACCTT  
 CTCTAGCCAGTCAGGACTTTCTATATCAAAAAGGCTCTAAATCAACTGTTTTGGCTGCTCTTG  
 ACTCAAACGGAAACACAAAATCATCAATAAAACATCCGAGTTAAACAGTTTTAAACTCCATT  
 TCAGAAAGTTTAGTGCCGGCTGCTCACTCGTTCAATGAACACACAGTTACTATCCCTGCAAC  
 GGTGGATTTACCAAATCCGGTACATGATGCCCAAGCGAAAGATCTGTCAAATGTTACCGT  
 TAACATCTGTGCTATCGAACAAATCGGAAAAGTCCGTGCTTTGGTTTTCTAGTTACGTAGAA  
 GAACTGCGACTAAAGTATTACAAGACTTCTAACTTTTTTACAAGCGCCTCCTAACTTGCCGGT  
 TGCTCTAAAACAAAAAATAAATTTGATTCAACCCAAGAATATTAAGGTCAAGTTGAGGACAA  
 GTTCTAAGCAAATTTGGTATCAAGCATGGTAAAGTTAAACAGAAATTAAGTGGCGTTGGAGACA  
 AGAAATGAAGAATCAGATGGAACCGCTACAGGGCTGAAAAATAAATCAATGTTGACCACAC  
 AAAGGAATTCCATAAATTTAGGGAAGGAAAATGAAACTGGCTCTATTTCAAAAAAAGAAG  
 GCACTGACGCAGAACAAAGCCGAAGACTACCTCAAGGACATACCCGGTATGAAGCATATAAC  
 AGTGATGATATAATGGCGCCTTTACGAGAAAAAAGAGGGCAAACCGTTCTGTTGATTCGGT  
 GTCAAGATCTAACACGGTAGTCAGCTACTACACAAGGTCTCAGAACAGAATGAGAAGTGGAA  
 CACTGGATAATGATTACGTGAACAGACAAAAGCTTCTACACATATCTCTCTTCAAGATTAT  
 CGTGATGCTAATGCTAGAAGTAATATATCGCGTCAGGACTCTGTCTCCACAACGAACCTGTA  
 TGTGGTAGACCTCAGCTATTCTCTGGGGCATGGCTTGCGTGTGGCAAACCCTGATTACAGACC  
 CAGAATGA

>YOL143C 0.76 Cold

ATGGCAGTTAAAGGATTAGGCAAACCAGATCAAGTTTTATGACGGTTCCAAAATCAGGGTCCG  
 TATCATTCATGCCCGTTGGAACCGTGTCAATTATTGACGCTCTTGTGAAAGGTGCTATTGAAA  
 GAATGGCTTCCCTTGGTGTGCGAGGAAAATAACATAATAAATTGAAACTGTTCCCTGGATCCTAT  
 GAATTACCTTGGGGGACAAAAGGTTTTGTTGACAGACAAGCGAAGTTGGGAAAGCCGCTAGA  
 TGTGTAAATTCCTATTGGTGTACTTATCAAAGGTAGTACAATGCACTTTGAATACATTTTCAG  
 ATTCCACCACTCACGCATTGATGAACTTACAAGAAAAAGTCGACATGCCCGTCATTTTTGGC  
 CTCTTAACTTGCATGACTGAAGAACAAGCCCTGGCCAGAGCTGGCATCGATGAAGCGCACTC  
 CATGCACAACCATGGTGAAGATTGGGGTGTGTCAGCAGTGGAAATGGCTGTTAAGTTCCGGTA  
 AAAATGCCTTTTTGA

>YOL154W 0.76 Cold

ATGAAGTTCTCTCCGGCAAATCTATCATCTTTGCAACTATTGCTTCTCTAGCTTTGAGTGC  
 TCCTGTCACTTACGACACCAACTCTACTGCTGAGTTACAATCTCCTTCATCTCAAGAAATTC  
 TGGGTTGGAGTCACGCAACTTTTCCTACCATTTACCAAACCTGTAATGAGACGAACGCAAGA  
 ATGTTGAATGCAGCTTTTAAAGGATACCGCTGAAATCACCGCTTATGGTAAAGATAGACTTTT  
 GAACTATGGTGTGATGACGTTTACTACAAAAGATGGTTTGGTAAATGGTAGTATTTTCACCG  
 TCATGGGTGTCTTTGAGCAATTGATGGAGGCTTCCAAGGGTGCCATGCTCATGAGATGTGAT  
 GATATTGATGGCTTGTGTGCAGCTAATCCAAACTATTACGCTGGTTCATCACCGTCAATCTGC  
 TCCAGCTGAAACTGTTATTTGTGATTACTTCTACACTTCCAAAAGCCACTATCAACAATTT

GTTTCGAAGGTACTATTGTTCGATGTCGGTCCAAAACATTATGCAGGTATTGATATGTTACAT  
 CGTACTTGCACGTCCCTACCATGAGTATGGATGGATATGTTGGCGAGTACGCGGAACTCT  
 TGAAGAAGTTGTGGACTACCCCAGAACAATGCTACTTACGCAGTTAGAAACACCGACAAC  
 ATCTTTACTATCTCGCTGACGTTTACAGTGCTTCTGTTATACCTGGTGGCTGTCTAGGTAAC  
 TTGTAA

>YDL118W 0.81 Cold

ATGTTTGAATCGTTTGTAAATGAAGGCACAGCATTCTCTCTTTGCCAAAGATGAGCGCAT  
 AAGGTTCAAACATGATAAATAAAGGCGCTGCCTATTGATGTTTCGTAATGCTGAAGGTAATG  
 TACCTCTCCATAGCTGTAGAGGGCTGTCTATCTCTTTCAAATTTTTCCATAATGTAGCTTTC  
 TTGTCTTGCTGGATTCTCGTCTTCAAAGGTTCAAAGGTTGCAACGCAACAGCAGATGTTAG  
 CCCACCGAAAAAGCCCCGATCAAATGCGATGAATTTCTTGGCTTAGTTGCTTGCTCAGTCA  
 TGTATGCTGCTTCACAAATTGTGTACCTTCTAGTTGTTCCCGCTGTGCTATTTGCTTTTCTT  
 TTGGTATAA

>YGR099W 0.79 Cold

ATGGTTTTAGAAACGCTGAAACAAGGGCTTGACAGCAGTCAAATACATGAAGCTTTAATACA  
 ACTAGATTCTATCCTCGCGAACC GGTTGATCTAGATGCCTCGATGGTTCTCATAAAATTCG  
 TAATTCCAGTTTATCCATCACTACCAGAAAAGATCGAAGGTGATATTGAGACGGCTAGCTTCT  
 AAATCGTTTACATTTTTATGCCAAATTGTCACCTTCTCAAGGACAATAAGTGGCCGCGATGG  
 ACTGCAAGAGATACGCATATACCAAGAAATTTTAGAAGACATCATCAGTTTGAACCGGGAT  
 GTTTGACTTTTTATTTAAAGGCAAGCACTACTAGCAAAGCAGACCGTGATAGCATTAAGGCC  
 CTTTTCTTTGGGAGCAAGTTATTTAATGTGTTGGCCAACCGAATTGATATGGCGAAATATTT  
 GGGATACCTTCGGCTTCAGTGGAATTTCTACTTGAGAGTAATGAAACAGATCCACCTGGGT  
 TTTTAGGGGAATGGTTAGTTTCATCATTTTTGCTTAACCCAGTGCTAGCGGCAGATATGTTA  
 TTAGGCGAATTATTTTTATTGAAAGAGTCGTATTTCTTTTCTTTTCAGAAAATCATATCTGC  
 TAGTAGTCTGATAGATCAAAGAGGCTGATTGCTAAGTTTTTATTACCATATATTCAAGTTA  
 TCGTGACTTTAGAAAATTTGAACGATGTTAGGAAAATTTCTGCGGCGGTTTGATCTCGATAAA  
 ATCATAAGTCTGTCCGTATTATTTGAAATACAGTCGCTGCCATTGAAGGAAGTGATAGTACG  
 TCTGATGAGCAACCCTCTCCACGAAGTTGTTAGCGCTTTGGTAAGTAAATTTGCTGATT  
 TTACAGATGAGGAAGTAGACACAAAGACATGTGAATTGCTTGTACTCTTTGCAGTGCACAAT  
 CTCAATCATTCCAGAGAGAGGAAATAGCACACGATGAGCGGTTTTTTGAATGGCGTGACCAA  
 ACATTTAGGTAGCAATGAACGTGAGGCAAGGAGCGTGCGATGTTTATTGCCAAGCTTTTAT  
 CAGGCGGTCTCTGAAGTACGAAAGTGATTTTAAAATCAATATACCGAATGTCAAATTCGAA  
 AGCAATAGCGATGATAAAATCATTGATTTCCAATCTTTAAAAAATCCATCCATATGCAATAC  
 CCAAAGTATGTGGGTAAGGATAAGATTACTGAGGTCTCGGGTCATGTTCAAAGCCTTACAT  
 TGGACTGCAGTGATAGCGATGATGAAGATGAGAACGATGAGCGGGAGATTGTTAAACGAATT  
 GTATTTTTTAAAAGATTTAATGAAAGAATACGAAAAAACTGGGGAATCTCGAAAAGCTCCATT  
 GATACCACTTCTGAAGCAAACAGTGAATTTGATACGGCAAAGGGCGGATTTTTCAGTTAGAGG  
 TTGGCTATTATGCACAAGGTATTCTGTCAAGCATTGTGTGCTTGAATAATGAATTTGATGAA  
 CCGCTTTTCGAGCAGTGGAGAATAAACGCTCTAACAAGCATACTGGTCTCCTTCCAGAGAA  
 GGTGAATGGCGCTATAAATATTTCTATTCAATTCAGAAGTGTGTTACAGCAAAGGATGTCAC  
 TATTGTCGGCTCTGGGTCTTTCTGCAAGAGAGTTGAGAGGGCTTGATGATCCTACTATTGTC  
 AAGCCCAAGTTTGATTTTCCAACAAATCGTTTACCGTGGGATGATCAAAGCCATCATAATAG  
 TAGGCTTGTTGAAGTTCAAGAGTCAACAAGTATGATAAAGAAGACGAAAACAGTATGGAAAT  
 CTAGAAAAGTGGCAAGGATCGAGAAAAAGGAACGCAAAACCGCTTTAGAAAATATGCTGGT  
 CTATTTCTTCTATCCGCTAGCACACGGTTGGCTTAATGGAATTGACGTAGGCACATAACAATCA  
 GCTTTTTAAGTCGCATTATTTAACAACACTGCGTATCATATACTTTGCGCTAACCCGGTCC  
 ACGATTTTGAATCCATGACGGAGTTGATGAATCATATAATTAGTTTACCCATAGAGGAAGGA  
 ATTTCTCTCAATAAAGGTTAG

>YNL233W 0.76 Cold

ATGTCGGATAGTATTTTCAAGTCTCAGAACTTTTAAATTCTACTTTTTATTCGTC  
 GACGTCGATAAATACTTTGATCATGCTAGAACCTTTTCGAAATTTCTCTGATATTGAAGGAGA  
 TATCAGATCAAAGTCTAAATTCATCAATAAAGCCATGCGAATCCGTCTTGATAGGGATGTT  
 GAAAGCTCAGTCTGCGAGCGGTCGTTTGGAGAAAGTAATGCCCGAGACTCAGAAGTACAAAC  
 GGTAAATATGACAACCTTCCCCCTCATTAAAGTGCATTGGCTGATATTCTGAACGAAAGATCCA

AATATGCTGACCAAAAACTAGAAAGGCACAAAATATTGAGTCTTCCATAATAGAAGAAGAA  
 GAAGAGGCCGAAGAGCAAAACAACCTCGATCAATTATCACGAGGATATAACTGGATCCAGGCT  
 GTCTGTACGAGAGGAAGCAAAATGAAAACCTTGGCGATGACCTCTCCAAACCTTATTGACATTG  
 ACGGATCCAATAGTATTCAAGTTGCCCTTTGAGTTTACCGTCTTTCGAAGAACCTGACTTT  
 TTGTCCACTCCTAGAGTAAAACCTGATTCTCAGGGACCTCGGAGCAAAGTTAGTACACGACG  
 TACTATTCTCGAACGAGACAACAATTTACCAGTTAAGCGGGAGGAAAATACTATCATTAATT  
 CAGAACTGAAAACACAACACATAGCGCACCATTTTTAAAAGAGGATCCGAAACCCCTCGCCT  
 CCTTCGAGTAAATATATACAACCCAAAAGTTCGTTTTAAACAAAGCAGAAGCGCGAAAGTATAC  
 TGATTCTTCTGCCCAAAGGACTACTTCAGCAGGCTCGGTACTTGAAGACACTTCTATGCATA  
 AAAAGAAAAGAGTATATTTTTCATTTCTGAAGAAGAAAGAACCGAAACAGTTATTGGTAAT  
 AATAGTGTAACGAATGAAAAAATAAGATGTCCTTCATCGAGCACTTTCTCAATGAATATTC  
 AACCTCTTTAAAACGCCTGAAAACCTAAAAGAAGTCTCACAGTAGCAGTAGCATTTTCA  
 ATTCCTTCTAAAGGGAAAAATGAAACATCAGACTCACCTCGAAAGGAACCAATGAGGCAA  
 AAAAAAGAACCCCAAAATCCAAGGACAAAAAGCAAGATACTGAACAAATAATTGACGCCGC  
 ATCAGTGTTATCCACTGAATCACCTCTACTACGAAAAACCACGACGATACTCCCGTGAAAA  
 TAGATCACGTAACGAGATCAATTGATCAGAGAAAACCTACTCCTTTAAACATGGATCTCATA  
 TTGGGAGGTGATAAACAGATAAATACCCCGCTACAAGAACACGTAAGAGAAGATGATGATGC  
 CAAAAATGATCTTCAATTACCAACCAAGGATAATTTTTTATCACTGGACTACGAAGCACCCT  
 CACCAGCATTTTCCAAACACGATACAGGTGAGGTTCTTTTCCAAAATTTTTGGATAATCAT  
 GAAGTCGACTCGATCGTTTTCTTTAGAAAAGCAAGATCTACAAAGTCTAACAAGAGAAGTTC  
 AATGAACTCGCAAAGAAGGTCATTGACAGATACGCTATCGATCAAAGCGCAAAGTGAGGGAA  
 TGTTCATCACTGAGGCATCTTCTGTTGTATTATCTACTCCAGACTTGACGAAGTCTCCTGCT  
 AGCAGCATTTTTAAAGAATGGAAGGTTTGAATACTCAGATAAATTTCTCCAGAGAACACTCTTA  
 CGAAGGTACCACGAATGAGGACTTTTTAGATATCAAGGACGATAGTGGTCCACTAAAAAAG  
 ATGACATATTTTTAGAGTCTATTGAACAAAAATTTGACCAGCTAGTGATGGCCTCTGATGAA  
 GAAAAACTGAAGTTGAAAGGGATGTACCAAAACCAAGAGAAGAACCTCTGAAGAAGGATTC  
 TGAAAGGCAAAGCGTTTTTGCAGATGATGATAACGAGTTAATTTCTGATATAATGGAGTTTG  
 CAAGTTTTTATTAACCTTCGGTGATGATGATCTCAATCTAGACCTAGACTTGGGAGATACAACG  
 GCCTCATATGCAACAGAAACCCCTGAACCTGTTGGAAATGATGAAGTAAATCGCTCTGGTAC  
 TTTTGATACACGAAATAACAAAGAGGATAGTTACAAAGAAAGAGAACTCAATCTTATTCCG  
 CTGCTGGAGCTACTACATACGGAGATGAGCGTCAAGGTCAATTACATACATTTGAACAAGAC  
 GGAAGTGAAATAAATGACAACGAATTTGAGAATGAAGATTTCAACAAACACATAGAACAGCC  
 CATAGAAGTTACTCCAAGAAATAATGCATATTTACCAGAATTCGAACCCAATAGACCTGTTT  
 CAATGTCTTTAAAGGACTAAAAGCCCAAGAATGAATACTTCTTTTATTGACTCCATGACG  
 CCTGATTCTCCCGTAAAATCAGACTTAACAAGTCTAGGTGAGGTGTATGTAAACAGTAATAA  
 TGACCAGGGTGTCCGGTTTTTCGTCCCAGATAAATACTTTACGACACTTATGGAGAATTCGAAT  
 ATGATAGACATCCAGAAATTTCCACTTGTAACCAGCTTACTCCACAACCTGGCTCAAATGATC  
 AAATTGGAATTAATGAGTTAAAGAGCGCAATGGAAGTACACGATGATTGCGGATGTTACAC  
 ACATTTTTATTAG

>YLR182W 0.79 Cold

ATGGCGTTGGAAGAAGTGGTACGATACTTAGGACCTCACAATGAGATCCCTTTGACACTCAC  
 TAGAGACTCGGAGACTGGCCATTTCCCTCCTGAAACATTTTCTGCCCATTTTGCAGCAATATC  
 ATGACACGGGGAATATTAACGAGACCAACCCCGATAGTTTCCCCTACTGATGAGGAAAGAAAT  
 AAATTACTGGCACATTATGGAATTGCTGTAAATACAGACGACCGAGGTGAGTTATGGATAGA  
 GCTGGAAAAATGTTTACAATTATTAACATGCTAAATTTATTCGGTTTTGTCCAGGATGCAT  
 TCGAATTTGAGGAGCCTGAAACAGATCAGGATGAAGAAGATCCCAGCCATTCGAAACTACCA  
 GAAACAAGACCAAAAGTGAATAATCTAAGGATAATATCAGCTCAAAGAGGATTAATAATTT  
 ACAAGATATGAGCCTGGATTCTGATGCACACAGAGAATTAGGCTCTCCTTTAAAAAACTAA  
 AAATAGATACCTCTGTAATAGATGCTGAGAGTGACTCCACTCCGAATACTGCCAGAGGCAAG  
 CCTAACGATGATATTAATAAGGGCCCTAGCGGCGACAATGAAATAATGGCACTGATGACAA  
 TGACAGAACCCTGGACCTATCATAACATTCACTCATGACCTAACTTCTGACTTTTTAAGCA  
 GTCCACTGAAAATCATGAAAGCACTACCTTCTCCAGTTGTAAATGATAATGAACAGAAGATG  
 AACTAGAGGCATCTTACAACGGTTGTTATTTCCAGAAATTCAGAAATGCCTACATCCCT  
 TAATAATGACAGCAGTAATAGAAATTCAGAAGGGGGGAGCTCAAACCAACAACAACAGCACG  
 TATCATTTGATAGCCTTTTGAAGAGGTAACGACGCTTTTCCCTAATACTCAATTAATCTT  
 AATATTCCTGTAGATGAGCATGGAACACACCATTACATGGCTGACTTCAATAGCAAACCT

GGAATTAGTGAAACACCTGGTTAAGCATGGTTCAAACAGATTATATGGTGATAATATGGGGG  
 AGTCATGCCTAGTGAAAGCTGTCAAATCAGTAAATAATTACGACTCTGGTACTTTTGGAGGCA  
 CTTCTAGATTATTTATATCCATGTTTAAATTTTGGGAAGACTCAATGAATAGAACAATTTTGCA  
 CCATATCATTATTACGTCTGGTATGACTGGCTGTTTCAGCAGCTGCGAAATATTATTTAGATA  
 TTTTAAATGGGATGGATTGTCAAGAAACAAAATAGACCCATTCAAAGTGGTACTAACGAAAAA  
 GAAAGCAAACCGAATGACAAAAATGGGGAAAGAAAGGACTCTATACTAGAAAAATTTGGACCT  
 GAAATGGATAATAGCAAACATGCTCAATGCGCAGGACTCTAATGGCGATACTTGCTTGAACA  
 TTGCAGCAAGATTGGGAAACATTTCAATAGTAGACGCTTTATTAGATTACGGTGCTGACCCA  
 TTTATTGCAAACAAATCAGGGTTGAGACCCGTGGATTTTGGGGCAGGTACTTCAAATTTACA  
 AAATACGAACGGCGGTGACGAAAACCTCGAAGATGGTCTCTAAGGGTGATTACGACGGTCAA  
 AAAATGGAAAGGCCAAAAAAATAAGGTCTCAACTGTTGAAAAACCCACCTGAAACAACCTTCG  
 TTAATTAATGATGTCCAAAATTTACTGAATTCATCTCGAAAGATTATGAGAATGAAACAGT  
 GCAATATAATGAGAAATTAGAAAAACTACACAAGGAATTGAACGAACAGCGAGAAGAATTAG  
 CTAATTTCTAGAGAACAACACTAGCAAATGTGAAGCAATTGAAAGATGAATACTCACTAATGCAA  
 GAGCAATTGACCAATTTAAAAGCAGGAATTGAAGAAGAAGAGGAAAGTTTATAGGGAAGAGAG  
 CAAAAAGCTAGGAATAATTGCAGATGAAAGTTCAGGTATTGATTGGGACTCTAGCGAATATG  
 ATGCAGATGAACCCTTCAAAGTAGAGTTCCTTTTCAGATTTCTTGGAGGATAAATTACAAAAG  
 AATTATGAAGGCGATATTTCCAAACTATTAGAAGCGGAGTCGAAAGAGCAGATAATGGAACA  
 GATACGAAATCAACTTCCCGCAGAAAAAATCCAATCGATGCTTCCACCAACGGTCTTATTGA  
 AGGCAAGAATAAATGCATACAAGCGGAATGATAAACACCTAACCAATGTATTGGATACAATC  
 AGCACCAAACAATCAGAATTAGAGAATAAATTTAGAAGAGTGTATCTTTATGTTTGAAT  
 CGACGAAAATAAAGTTGACAATATGCTTGATGGTTTTGTTACAGGCCATATCTTCTGAAGACC  
 CACAAGACATTGACACTGACGAAATGCAAGATTTTTTAAAAAAGCATGCTTCATGA

>YOR002W 0.76 Cold

ATGGCCATTGGCAAAGGTTACTGGTGAACAAACCAGCAGAAGAATCATTTTTATGCTTCTCC  
 AATGTATGATTTTTTGTATCCGTTTGGCCAGTGGGGAACCAATGGCTGCCAGAATATATTA  
 TCTTTGTATGTGCTGTAATACTGAGGTGCACAATTGGACTTGGTCCATATTTCTGGGAAAGGC  
 AGTCCACCCTGTACGGCGATTTTGGAGGCTCAGAGACATTGGATGGAAATTACGCAACATTT  
 ACCGCTTTCTAAGTGGTACTGGTATGATTTGCAATACTGGGGATTGGACTATCCACCATTAA  
 CAGCATTTTCATTCGTACCTTCTGGGCCTAATTGGATCTTTTTTTCAATCCATCTTGGTTTGCA  
 CTAGAAAAGTACGCTGGCTTTGAATCCCCCGATAATGGCCTGAAAACATATATGCGTTCTAC  
 TGTCATCATTAGCGACATATTGTTTTACTTTCTTGCAGTAATATACTTTACTAAGTGGCTTG  
 GTAGATATCGAAACCAGTCGCCCATAGGACAATCTATTGCGGCATCAGCGATTTTGTTCCAA  
 CCTTCATTAATGCTCATTGACCATGGGCACTTTCAATATAAATTCAGTCATGCTTGGCCTTAC  
 TGCTTATGCCATAAATAACTTATTAGATGAGTATTATGCTATGGCGGCCGTTTTGTTTTGTCC  
 TATCCATTTGTTTTAAACAAATGGCATTGTATTATGCACCGATTTTTTTTTGCTTATCTATTA  
 AGTCGATCATTGCTGTTCCCAAATTTAACATAGCTAGATTGACGGTTATTGCGTTTGCAAC  
 ACTCGCAACTTTTGTCTATAATATTTGCGCCATTATATTTCTTGGGAGGAGGATTAAGAATA  
 TTCACCAATGTATTCACAGGATATTCCCTTTTGCCAGGGGCATCTTCGAAGACAAGGTTGCT  
 AACTTCTGGTGCGTTACGAACGTGTTTGTAAAATACAAGGAAAGATTCACTATAACAACACT  
 CCAGCTATATTCATTGATTGCCACCGTGATTGGTTTTCTTACCAGCCATGATAATGACATTAC  
 TTCATCCCAAAAAGCATCTTCTCCCATACGTGTTAATCGCATGTTTCGATGTCCTTTTTTCTT  
 TTTAGCTTTCAAGTACATGAGAAAACCTATCCTCATCCACTTTTGCCTATTACACTACTCTA  
 CTCTCTACTGATTGGAATGTCTATCTCTGTAAAGTTGGATAAACAATGTGGCTTTGTTTTA  
 CGCTATGGCCTTTGTTGAAAAAGGACGGTCTTCATTTACAGTATGCCGTATCTTCTTACTA  
 AGCAATTGGCTGATTGGAAATTTAGTTTTATTACACCAAGGTTCTTGCCAAAATCTTTAAC  
 TCCTGGCCCTTCTATCAGCAGCATCAATAGCGACTATAGAAGAAGAAGCTTACTGCCATATA  
 ATGTGGTTTTGGAAAAGTTTTATCATAGGAACGTATATTGCTATGGGCTTTTATCATTTCTTA  
 GATCAATTTGTAGCACCTCCATCGAAATATCCAGACTTGTGGGTGTTGTTGAACTGTGCTGT  
 TGGGTTCAATTTGCTTTAGCATATTTTGGCTATGGTCTTATTACAAGATATTCACTTCCGGTA  
 GCAATCCATGAAGGACTTGTAG

>YPL021W 0.78 Cold

ATGTTATATAACAAAGAGCAGGGAACAAGCGGCGCTAGTAGCTCTGGTCGTAGAACGAAAT  
 CCCTTCGATCGTTTTGTACAAATGGTTCTGTTTCATTGCCGCTAATCCCAATTAATGCTGTT  
 CAGTAGCCAGTATCCCGAAATCTGGTGTACGCCAGATTTAAAAAGAGCAGATATTTCTTGA

CAGAAGATCAAAAGCTTAAATAGTGCCTGAGTCCAAAATTGAAGGAAGAAAGTCGTCTTGG  
 TGGCCCTTTGCATAACCCCTCTATTCTACCAGCCCCATCTTTTTTCATCACTACCAATATCAT  
 CCAATGGAAAGAAATCTTTAGCAGGATATAGACCTAAAAGTAGGAAGAAACAACTATACTC  
 CCCAACGGTCAACCAAAAGAGTGCGCCACTTGTGGTGACACCTGGACTTCTCAGTGGAGAAG  
 TGGACCTAATGGAAATGTTGAGCTATGTAGTCGATGTGGCATAGCATATAGGAAAAAAATGG  
 AGAAAAAATACGATCGCAACAATCCTCCGATGATGGTACTAAAAATTTTATATTTAAAAAT  
 AAATAG

>YJR053W 0.75 Cold

ATGTCAATTAGGCCCTCTCACGTTAAACGGTTTAGATGAGCCAGAAACCTCTTTTTGAAGAACT  
 GAATACAACCTCTACCTCGCTTTCATCCCATGAAACATTAACCTTTGGAAGAAAACGTGCCAC  
 CATTGAGTACATCAACTTATATACCGCTCCATCCTCGGTAGGTAATCTGACACTGGCAGC  
 GTATTTTCCAATAGTACCAGCGCGTTTTGGTCTAATAAGCAAGCAGACGATGATCAGGACAT  
 GGAGGTAGACCAGGATGATGAATTTCTAAATGACTTCCAGGAATTCCAAAATAAAAAGGATG  
 ATTTTGACGATGCTATTAAAAACAATTTTCATTTGAGAAAATGGATGTGCAACTGGCCCTTTC  
 AAAAACGACATTTTCGCAGAAGAGTTTGATAGAAAAGTGGTGGAAAGATAAACCAAGGCT  
 AAAGCAACCTAGATCAATGATGGAATTGAAACCAAAAAGAAAAGTATCAAATAGCGTCACTT  
 CAAGAACTTAAGGTCTGGTAATTTCTGTAAGATTTAAGAAATCTATGCCCTAACTTAGCTTTA  
 GTTAATCCAGCTATCAGAGAAGAAGAAGAGGACGAAGAACGAGAAAGAGAAGATCAACGAGA  
 GTTTAATTACAAGATTGATAACGATACGCAGGACACAATTTTGGCGAAAATTCAGTTCAGATG  
 ATGAAGGTGACTTCTGACAGGATTTGAAGAATTAGAGGGTGAAGCAATTGATGAAACGATT  
 TCTTCGAACGATAAAGAAAAGTGCCGACCATCCGCGTTTTCTTAAAGAAAGTCATCCTCATCTTT  
 GCCATTAAAAATATCACCTGCACAATATGATATAGTAAAGCATGACGAATTATTAACCTCCAG  
 GTCTTCATAGGCGACAACGAGATTGGAATACCCAGCAGGAACCTGGACTCTTTTAAAGAAAA  
 CGATCAGTAAGACACTGTTCTAATCAAAATGTACAACCTCAATGGTCCAGCTAAAATCAAAAC  
 AATAAACAGCAAATGATCATAATACTCCAATGAAGAAAAGTTCTATGATATATAACCCGA  
 AAATATGAAGTGGGAAGGAAATGAAAACGCTTTAAGCAAATTTAGTGATGTAGACACGGCA  
 AACAGGAAAGCTTTATTGATAAAAAACAAGCTACAACGAGATGCAGATTCCTAAGAAGCAAAA  
 ATATTTCTGATCTACAGCATGCAAGAGCCACTTCGAGAAAATCAAAGGTCATCGGGAACATGA  
 TTTTAGATGAACAAAATTTAAGATGGGTTAGTGTTCAGAGGAAGAAGCAGACCCTTTTGCA  
 GGCATTCCTGAGATAAACTTACCACCAGTTGGCAAAAAGTATGAAAAACGTAGCTCCTCACC  
 ATTTTTCGCTTCCAAAAGCCAAGTTAATACGCCATTTGTTTCAAATGACAATGATGGCGTTT  
 ATCAAAGTACGGCTGCTCAAGCAAGACTCCGTAAATACCATTCAATGAGGACACTTAACGGT  
 ACAACAGAACTCCAGAAATAAGCTCTACTTTCCATTTGAGTTCAAGAGCATTGGAAAAATT  
 TTACCACGAGGAGAACAGGTGGTGTAAAAAGTTAGCCTCATGGTTTATACCCCGAGATGAGA  
 CCATTATCAGTGTGATGAGGAAACAATCATGGATGAAAGTACGGTCAATAGCAAGAGAAAA  
 TCCTATATGTATGAAATCAGGAACATGGTAATCAATTCGACAAAAGATTAG

>YOL023W 0.82 Cold

ATGCTCAGAAGACACGGATTATTCTGGTTAAAGACATGTCCCCGTCTAAATGTTCTTCTAAA  
 TCAATCCATACCGATACCTCATTTGCTTCATAGCCGTGATATTTGCCAGCAAAGATGGTATG  
 CAAAAGGGAAAAGAAGGAACCAGATTTCCAAGAAAGAGTTAAAGCCTCTCAATTTTTCTATT  
 CCGAATTATATTTCTGTGAATAAATTGGCCAATTTGTTAAATTTGTGCGTGTGGAAAGATTAAT  
 CAAAGATTTGACAGCATTAGGTTTCGAAAATATTACAACCACGTATATATATCAAAGAAT  
 ACGTCGAATTGATTTTACAAGAATACAACCTTGGCCCTCCGAATCTGTCAACGTCTACAAAT  
 TTAGATAATGTTTATGATGAGCTAAAATCTCCTGTAAACCCAAAATTTAACCAAAAGAGC  
 CCCCCTGGTAACTATAATGGGCCATGTTGATCATGGTAAGACCACTATCATAGACTATCTAA  
 GGAAATCTTCTGTTGTGGCTCAAGAACATGGTGGAAATCACGCAACACATTTGGTGCCTTTCAA  
 ATAACAGCTCCGAAGTCTGGGAAAAGATCACATTTTGTAGACACCCCTGGCCATGCTGCCTT  
 TTTGAAAATGAGAGAAAGAGGTGCAAAATATTACTGATATTTATGTTTTGGTGGTATCTGTAG  
 AAGATTTCTCTGATGCCCCAGACATTAGAAGCCATAAAAACATGCCAAAAATTCAGGAAATGAA  
 ATGATAATTGCAATAACGAAAATAGATAGAATTTCCACAGCCAAAAGAACGTGAAAAAAAAT  
 TGAAAAGTTATAAATGATTTGATTGTTCAAGGAATACCAGTAGAGAAAATTTGGCGGAGACG  
 TTCAAGTGTATCCGATAAGTGCCAAAACCTGGTGGAAACATGGACCTTTTAGAGGAATCAATA  
 GTCCATTAAGTGAAGTAATGGATATAAGAGCTGAAAACCTCCCTAAAACCTATCGCAGAGGG  
 TTGGATTATCGAAAGTCAAGTTAAAAACAGGTTCGAAAATGTGGCGACCGTCTTGGTTAAGA  
 AGGGCACTTTACAAAAGGGAAAATTTCTAATTTGTGGTAATACATTTCTGCAAGATCAAAAAT

TTAATTGATGATAAGGGCATAACCGATTCTTAAGGCAACACCATCATATGCTACAGAGGTTCT  
 TGGTTGGAAAGATGTACCCCATGTTGGAGATGAGGTCATTCAGGTAAAGAGCGAAGCGATCG  
 CTA AAAAGTTCATCAGTAAAAGGCAAGATCTTATCGAAGTTCAAAAAACTCTAGTATCGTT  
 GAAAAATTAATGAAGAAAGGGCCCTTGCCAAAGAGCAACACCTAAATAAGGAACTGGAACA  
 TGAGAATACTGTCCAGGAACACGAACAAAATACTGGTCTAAACTTATTAATTACATCATCA  
 AATGTGATGTCTCTGGCTCAGCAGAAGCGGTTTCAGAAAGCATTTCCTCTCTAGGAAATGAC  
 GAAGTGAGATGTAATGTTATCTCTTCTTCTGTTGGTATACCTACGGAAAGTGACTTAAAGAT  
 GCGCAAATAACGGAGAGTACAATTCTATGCTTCAATTTGGGGAATTTGCCGAGTGAGGTGA  
 TCAACAATCGTGCTGGCATCAAAAATAAACAGTACAATGTTATCTATAAGCTAATTGAAGAC  
 GTCACTGAAACACTAACTGAAAATCTAAAGCCCATCTTTGAAAAAAGATCGTTTTCAACTGT  
 TGACGTTTCGTGAAACTTTTGACTTTAGGTTAAAGAAAAAATTATTAGGATTGCAGGTTGCA  
 AAGTAAACAACGGTGTTCATCAAAAAGAATTCATTGGTGCAGGTAGTTAGAGGTCCTAACGAA  
 GATGTAATTTTTGATGGGAAAACTCTACTTTGAAGCACAATAAAGATGACGTAGCAGAAGT  
 TTCAAAAGGGCATGAATGTGGAATCACTTTGAGAGTGGATTCGAGGGTTTCAAACCAGGTG  
 ATAAGATCCTAGTTTATGAAAACGTGCGAGTTCCTCGTTACTTGTA

>YDL216C 0.81 Cold

ATGTCACTTTTCAAATAAGACTGTAAAGGAATTACGACAACACTACTAAAGGAAAGGTACACCGT  
 GGAAGATGAACTAACTGAATCTATAGCGCTATCAAGTATGCGATTCAAGCCGTGCAAGAAC  
 CTGAATTTTCATGCGCTAAGCCAATCTTCCTTGCTCAAAAATAAACTAAAAACAACAAAGTAGT  
 ACAGATATTCCGAGTTACACCCACGTACTTATATCAAAAATTATCATGTGAAAAGATCACCCA  
 TTATGCAGTTCGTGGAGGAAAATATTGAAATCATGGGCATATTAATGGGGTTCACATTA AAAAG  
 ATAATATTGTTGTAATGGATTGTTTCAATCTTCCCCTAGTAGGGACAGAACTCGCGTAAAT  
 GCACAATTGGAGTCATACGAATATATGGTTCAATATATCGACGAGATGTATAATCATAATGA  
 CGGTGGTGATGGGCGAGATTACAAGGGCGCTAAACTGAATGTTGTTGGCTGGTTCCATTAC  
 ATCCTGGTTACGACTGTTGGTTAAGTAATATAGATATCCAAACCCAGGATTTGAACCAGAGA  
 TTCCAAGATCCATATGTCGCAATTTGTGGTCGATCCCTTGAAAAGTCTGGAAGATAAAAATTTT  
 AAGAATGGGTGCATTTAGGACAATAGAAAAGTAAAAGTGATGATAATAGTGCCACTTCATACT  
 ATGAACTAGAAACAATCATATTTGATTAGAAATTGAACCGAGCGCTATTTGAAACAAAGTTA  
 AACTTACATTGCGTAATAGAGGATGATGAGTCAGAACAATAATCATTAAATAGATTGATCGA  
 TTCAATGAAGCAGTATAGCTATTTGATGGATTCCAAAAATGTTAGAACAAGGATTAAGTTGG  
 CTA CTACCAGTGAACGTGTTAGCAACGAAAATAAAAAAACATTGACTATCAAAACCGTTCA  
 ACAAGGTCTCAGTCTGCCTCAATACGCAAAGGGGGGATAGCACTGAAACAAGCTCCTTTGG  
 AAGCATGTTTTTCAGGTGATAATACTAGTGACGTAGATATGGAAGATAGAAACCTTACCGAGT  
 TCGACAGTACTGACACTAGTCTGTGCATAAACGGCGAACCGAGCATTTCATGTAAATCGCGTG  
 GAAAGAAGCAGCAGGTCTACCGACAATTTTCACAATTTCTAAAAAACGCATGAACAGCAATCA  
 GGAAAGATGTCATGATGAGGGCAATGATATGTTACAGAGAAATGTCTTGAGACAGATTATG  
 CAAGAGCAAAAAATCGAATACTTGCGTCAAAGATAAAAACAATATGAGCGGTTACGTTTTTAC  
 AAGGACACCTTTACATTATGA

>YIL002C 0.72 Cold

ATGAGACTCTTCATCGGTAGAAGATCACGGTCGATTGTAATATCTTCCAACAACACTACTGTTT  
 ATCCTTCCAGCGTTTGCGCAGCATACCAGGTGCCAGTTCTCAGCAGCGTCAATTAAGTAAAA  
 CTCTTAGCGTAACAATCAAGTCTTACCCTGACACAGATCTTTCAAGTGATAGTAACTATCTC  
 GAAGTCAAAAGTGCATATTTAATGGATTATTAGGGCTCGTTTGTCTTAATGGTGATATATA  
 TGTTGCCGTCATATCTGGTGTTCAGAATGTTGGGTTTCTCCTCGATGGAACTGATAGATCATC  
 AAGTTAGGCCTTCGGAGAGCATTTATAAAGTATTGGATGTTGACTTTTACAGCTTAGAAAAT  
 GATGTTTTTCGACTACCTCCTCTGCGAGAGATCAGAGCAAAACTATGATAAATTGATTCATGA  
 GCATCCTTGCGGCCCCCTGAAAAAAGTGTAGTGTGATGGAACATTCTACTATTCTAGAGATT  
 TCGACATCTCTAATATCGTGAAAAACCATGGTTTATCACATAACTTAGAATATACCGTAGAT  
 AATCAAGATTTATCATTTATTTGGAATGCTAACTTAGCAAGTGAGGTAATCAACTGGAGAAG  
 CAAGATTTCAAATGAGGAGAAACAACCTTTTTGCCAACGCAGGGTTCTTAACATTTGTAATTC  
 GGGTTATTGCAAGACAGCATTAATAGAAGACGGCCCAAATACAGCCTCTATAACCATTATT  
 TCCAGAATTTGACTGAGAGCAAGCAGGATACGCTAGAATTGGAGGGTATTAGTGAAGATGG  
 GAGAGTGTGCTATTTGTTGAGACAGAAATGTAGTAACCACAGAAAAGTTTATTTTTTCTT  
 ATACTCAAGTGAACGGAAGCATTCCTCTTTTTGGGAATCTGTAGAAAAGTCAACTGTTGTAT  
 GGAAAAAATTAAGGTAACAAAAGATTCTATTGAAGCTCAGGGAGCTTTTGACAGGCATTT

TGATAATTTAACCTCAAAGTATGGTGTGTGAGTATCGTTAATATCATAAAACCTAAAAGCG  
AATCACAAAGAAAAGTTAGCACTGACGTACAAGGATTGTGCTGAATCAAAGGGAATAAAAATA  
ACAAATATAGAATACAGCTCAAGCGTTCTGACAAAGTCTCCCCACAAATTACTTTATTTATT  
AAAACAGGATATTTACGAGTTTGGAGCGTTTGCCTATGATATCTCTAGGGGCATCTACTTTG  
CAAAACAAACGGGGTATTAAGAATAAGCGCATTGATTCAATTGAAAAACCTAACACAGTT  
GAAAGGTTAGTGAGCAAGGAGGTACTTGAATTAACCACAAATGAAATTGATGTATTTGAATT  
GACTTCCCCATTCTTGGACGCACATGATAAGCTATGGTCAGAAAACCTATTACTGGCTTGATC  
GAACGTATACTAAGCACACGAAGAATTCTGGTAAATATACAAAGGTTTATTCGAAGTTATTT  
GGTCCCCGAGTTAGATTATACGACCCGCTCCATATCTACATCTCTCAGTATTTAAAGCAATT  
AAGGTCAAATATACGTTTGGAGAAAGACATCTCAATTTTTGCAGGTACATTTAATATAAGTG  
GTAATAATCCAAAAGATGATATAAAAGATTGGATATTTCCAAAATCAATGTCCAAGGAGGAT  
GAAATGGCTGATCTTTATGTTATCGGATTAGAAGAAGTGGTAGAACTTACCCAGGTCATAT  
GCTTGCTACCGATCCATATGTCCGACAATTTTGGGAGAAGAAGATATTAACACTATTAATG  
GGCCCGACGCAAAAAAAAAATATATCCGTTTATGGAGTACACAGTTGGGTGGTATTTACTA  
TTATTATTCATGAATGAAACGGAATATTCCAAGGTAAAGCATATTGAGGGGGATGTTAAAA  
AACCGGGTTTGGAGGAATGGCTTCTAATAAAGGAGCTGTCGCGGTTAGTTTAAATACTCAG  
CTACAAGATTTTGCCTACTAGTATCTCATTTAGCGGCAGGCTTAGAAAAATGTTGAACAAAGG  
CATAATGATTATAAGACGATTGCGAAAAGCATACGATTTTCTAAAGGATTACGAATAAAGGA  
TCACGATGCAATTTTGGATGGGCGATTTCAATTACAGAATATTGATGTCAAACGAAGATG  
TTAGACGAAAAATGTTTCTAAAGAATATGCCAGCCTATTTGAAAAGGATCAACTTAATCAA  
CAAATGATCGCAGGTGAGTCTTTTCCATATTTCCATGAAATGGCGATTGATTTCCACCTAC  
CTATAAATTCGACCCAGGAACATAAAACTACGACACGAGCGAAAAAATGAGAATACCAGCAT  
GGACTGATAGGATTTTAAAGTAGGGGAGAAGTACTAGAACAGTTAGAATATAAATGCTGTGAA  
GATATACTATTTTCCGATCATCGGCCCGTATATGCCATATTTAGGGCTAGAGTGACTGTAGT  
GGATGAACAAAAAAGACTACTTTGGGTACGCAATCTACGAGAAGATTATGGAAAGGCTAG  
AGGGATTGGATGATGATGAGAAAAATTGCAGTTTTGAGTGATGATGCATTTGTTATCGAAAGT  
TTTGAGGGCAGTGATTTCGATAGCTGGCCCTACGCATTCTCCGACACCAATTTCCGAGCCCAA  
AAGAGGTAGAAAGTTACCACCACCTAGTTTCGGATTTAAAAAATGGTGGATTGGAAGTGGGA  
AGCAAGTTAAAGTAGTTCTTGACGTAGACCCGGCCGTTTACATGATTAATCCTAAAAGAGAT  
CCCAATCCATTCGTTGAGAACGAAGATGAGCCACTTTTTTATAGAAAGGTAA

>YOR156C 0.8Cold

ATGGCAAGTGTCATGTCAAATAATAATAATAATAATAATAATAATAATGCCAGTTATATGTT  
TACGAACCCTTTGTCCAACACAGGTGGTGGACTCATAAATGAAATAAAAGATGCAATAAATG  
AAATGGAACAATTAAGGTTCTAGAGTTAAAGCAAATATGCAAATCTCTGGATTTATCCATA  
ACGGGCAAAAAGGCTGTCTTACAAGACCGAATAAAACAATTCCTTAAGAAAATCCTGTGATAT  
TGGACATATAGATCCGTGGAGGCCAAGGCTATTAAGATTCCTTATCGCGAAAGTAAGGATAA  
ACTCATCATTACCAAATACTCTACCCTTTGGGAAACTTTAAAGACGGGTGCGTTCAAGCAT  
CCTGTAGCATCGGGGCAACTACCCGTGACAGCTCTCCAGAGTACTGCATTGCCACCTTATTC  
CCAACAACAGGCCTTAGCATATCTTTTACCTCACCCTTTTACAACCAATAGTACAAATAC  
CGGATGCCAATAAAAAATTGAAGCAATCTGCAGGAAGAGGTTGTACAAAAATGAAGTTCAAG  
GTAAGTAAATCTAATCATGATCTTTTGAATCTAACAAGAGTTATAAACTGTATTTGTTTTC  
TGGCTTTTCAATACCGTTTATATATGAACTGTGGGCCATGAGGCAATAGATTTCCCGTATC  
CCTGTGAAC TAGTGTTTAATGGCACC AACTAGAGGACAACGTGAAAGGTTTAAAGAAACAA  
AATGGGACAGGTAATCCTGCAAATTTAACGCCCTTATCTTAAAGTACCGACCGAGATGAATCA  
CCTAGACTTACATTATCTCAATATTGATAAAGAGTACTCTATAAGTTGCTTTATAGTGGAAG  
TTTTTTCACCTGAAGCTCTTCTGGGGAAAAATCTGAAAAGGCCAAAAATATCAAGCAAGCC  
ACCACAGCATACATCAAAGAACCCTGAATGAGCAAGATGATGACGATATTTATTACAACCTC  
CACGGTGTGAGTTTGAATGTCCATATATCTTGTACAAGGATGAAGTATCCGGCGAAGACTG  
ACCAATGTAAGCATATCCAATGTTTTGATGCTCTCTGGTTTCTTCACTCTCAGTCACAAGTC  
CCTACATGGCAGTGTCCGATTTGTCAACACCCATAAAAAATTCGACCAGTTGAAGATTTCCGA  
ATTTGTAGATAATATTATTCAAAATTGCAATGAAGATGTTGAGCAAGTTGAGATATCTGTTG  
ATGGCTCATGGAAACCGATTACATAATAGTTTCGGCCGTTATAACGGATACTGTTAACCAAAAT  
CACAGTGTGAAAAACGAGAACCAAGGCACTGTCAAACAAGAGCAAGATTATGACAGCCGAAA  
TGCCCTTCGATACTAATTTGCGTAATGGTTCAAACCACAACGAACCCGAAAATAATATCTCTGG  
ATAGCTCAGATGATGAAGCCTTTATTCGGCTAGTAAAAGCTTCCCAACGCACGTGAACCC  
CGTAATGACCAATTAAGAGCAGATATATTTCCCTCAGAATCGGAAGGATCCAGTGACTACAA



CCCAATCATAATCAACGCCGAAAGGTTCTCCAACCTATGGACCAAGATAATTATCAAGATG  
 CTTTTCAAATGAGGTCATTTTTGAACCAAGGCGCTACTACAAATATAAATGACACACCGACG  
 AACAAATAGCAGTATTAATTCTTTCGTTACGGCGACGAATGGTGACAGCAGAATATTCTACAA  
 TAGAGGGCCATCAACGCCACTATTACCGGCTGTTCTACAAAATTTGACTAATCAAACGGAAG  
 CGCAGAGAAACCCCTACGGACCTAATTACAATACCACAGCTCAAGATCGTAATCTTTTGGGA  
 ATCGAAGGTGATTTGCCTCCAATCCCCCTGTGGACCCAAATTCAGAAGCAGAAACTGAACT  
 ACCAACAAGGACCACATCGGCGGCACATCTCCCTCCATATATACACGTGAGCACCAGCGGCC  
 ATGGGGATGATGGAAAAATTAGGAAGAGAAGGCATTCTAATGTTTCTATCTACATTCCGAAG  
 AATCCATACGCCACCCTTATGAAACGGAGACCACAGGCAAATCACGCCATAATGAATAAAAC  
 TCTGGCCCAAACCTAATGACTTTAACACATCGGCTCAAGATAACTCGGAAGTGGTCGATTTAA  
 CATCAGATTGA

>YDL005C 0.76 Cold

ATGGTAGTACAAAATAGCCAGTTTTCGTCTGTTCCACACAGCCAATTTCTCTGAACGGGGGAG  
 CAATACCAGAACAATGACGTATAAAAATAAGCTTACTGTTTGCTTCGATGACATCCTAAAAG  
 TTGGAGCAGAAATGATGATGCAACAACAGTTAAAAAATGTACAACCTAGATTCTTATCTCGTC  
 AATGGTTTTAGTCAATCTCAGCAAAAATTTATGAAAGAGAAGGTTAAATTTATTTTCATGGAAT  
 TTTAGATGATTTAGAGACTTCTCTAAGCCAGAGTTCTTCATATTTAGAACTCTTACTGCAC  
 TCGGAAAAGAAAAGGAGAAAAGAGAGAGGAAGCTGAAAAAAGAGGGCTGAACAAGAAAAT  
 ATGAGGAAGGTTAGAGAACAAGAAGAAATAAAAAAGCGACAAGAACTCGAAGAAGCCTCCCA  
 ACAGCAGCAACTCCAGCAAAAATCAAAGGAAAAAATGGCCTTGGTTTGAACCTCTCCACAA  
 CAGCACCTGCGAACACAACGGATGCCAACGGTTCCAAAGAGAATTATCAAGAACTTGGATCT  
 CTTCAATCATCCAGTCAAACACAACCTTGAGAACGCAAATGCTGCTAATAACGGTGCCGCATT  
 TTCTCCCTTAACCACTACTCGAATCCAAAGCCAGCAGGCCCAACCCTCGGATGTAATGTTCA  
 ACGATTTAAACTCTATGGATATTTTCGATGTTTTTCAGGCCTTGACAGTACTGGTTTTGACTCC  
 ACAGCCTTCAATGCCACGGTGGACGAAACCAAAGGCTTTGACGATAATGACTCAGGTAACAA  
 CTACAATGACATAAATATTTCTTCTATTGAAAACAACATAAATAATAATATCAATAGCACCA  
 AGAACGGCAAGGATAACAACAACGAAAGCAACAAAATAACAACGGCGATGAAAAGAAATAAG  
 AACACAACGAGGACAACGAGAACAACAACAACAGCAGTGAGAAGAACAACAATAATAATAA  
 TAATAACAATAACAACAATGACGATAACGGCAACAACAACAACAACAACAGTGGGAACGACA  
 ATAACAATACCACCAACAACGACAGCAATAACAAGAACAATTTCTATCACTACCGGAAATGAT  
 AATGAAAATATAGTTAATAATGATTTACCAACGACCGTTGTTTTCCAATCCTGGAGATAACCC  
 TCCCTCAGCCGACAACGGTGAAGAATACTTGACATTAATGATTTCAACGACCTTAATATTG  
 ACTGGTCGACCCTGGAGATAATGGCGAATTAGACCTCAGCGGCTTCAATATATAG

>YOL116W 0.8 Cold

ATGGCAAGTAACCAGCACATAGGAGCTTCAAACCTAAATGAGAATGAGGCTATATTAACCAA  
 CCGCGTTGCTGAGCTGGAAAGGCGTATGTGCGATGTTTGAGGGTATATTTACGCGTTAAGTA  
 ACCGTCTCGATCTTCACTTTAAAAAATATGATGTAGTGGTAAACTCCCAACAGCAACAAATC  
 AACGAACTGACCGCGTTTTTATCAACATTGCTGAATGACCAACAACGCCACGCTGAAATTTCT  
 CAGTGAAAAATTAAGCGGAACGTTGCATGGGGTGTGACGTACGTCAATATCCTTAAGCCAAA  
 CTCTTGACCCACAAGGCTTCACTGATGGAACCTACGGCACCAGGAGCTCCTAGGAATTATACT  
 TCAGTGCCTATGAATAATGATCAAACCTGCTCATCCGCAAAAATGAAGGAGCTGTTAGTAATGA  
 AACACTTTTTGAGGACATTTTGAATGGAAATTCACAAGAAAATGATAAGAGTCAACAACAAA  
 CTAACAGCTCAAATTTCTATAAGCCAAGAAAATAATAGCACCAACCCTTCAGTGGACACTCGG  
 TTCAACAAGCCGCAAAATTATAATTCCAATTTAGTCCCATCCTTGGAAAGATATTTCAGCAAA  
 TCCACCTAACAATGATGGTGGCCAAAGTCAAGGACTGTACATAAGCAGCAACTCTTCTCAAT  
 CACGGCAGTCTCCTAATCTCCAGAAAGTTTCTCCTAACCATGAAAATGCGGTTGAATCAAAT  
 GCACAAGAGAGCGTGCCGACATTTGAGGAGGAACAGTATGAGACTAAAACAGGATTGAAACG  
 GAAACGAATAGTCTGCACAAGACCCTTCGAATTTATCAAGTCACCACACTCTGTGATGGAGG  
 TTTGGAAGGAGTATACAGAAGGTGTTAACGGGCAGCCTTCTATAAGGAAAATGGAAGCTCTT  
 TATCAAACGGCATGGAGGCGAGATCCAGCAGTAAATAAAAAGATATTCGAGAAGAAAGGTTCT  
 TTGGAAGCCATCAAACCTGGCCTTAATCGTGGGTATTCAATTAACCTATGTTGTTGAAATAT  
 TAGAAAACCTCAAGATATGTTAATGATAAACAGAAGGTTAAACAACCTATTGGTTGGTTATGC  
 CACAGTTCTCATATTCAGAGACTTTGAAGTGA

>YOL163W 0.78 Cold

ATGATAGCGTGGTCCCTAGTGGCTACGTTGCAATGCAAAATGACAGGGAAGAGTTCTTTCTA  
TACATGTAGAGCACTTATGGGCCATTTTGAAGGTGGTTTTGTGGCTGATTTGGTTCTCTGGA  
TGTCGTA CTTCTACAGCTCTTCAGAATTGTCAATAAGACTGTCGTTCTCTGGGTGACACTA  
TCTCTAACACAAAATCATCACTTCAATTGTGGCCTTCGGGGTTTTTTCACATGAGAGGGATAGG  
TGGCATGGCAGGGTGGCAATGGCTTTTTTTGATAGAAAAGAAATTTTCACTTTAGTCATCGGTA  
TCAGTGCATACTTCTTGATGGTACCCTCCGTAGTTCAAACGAAGAAACCTTGGAGCAAGAAA  
GGATGGTTCACTGAGAGGGAAGAAAAAATCATCGTAAACAAGATTCTGAGAGATGATCCGAC  
AAAAGGGGATATGAACAATAGGCAAGGTATGTCACTTAAAAATGTTATGGCAGGGGATAACAG  
ATTACTATATATAG

>YGL130W 0.81 Cold

ATGGTTTTAGCAATGGAAAGTAGAGTGGCACC GGAAATTCCTGGGCTCATTC AACCTGGGAA  
TGTCACGCAAGACTTGAAGATGATGGTCTGTAAATTATTGAATTC CCCC AAAACCTACGAAAA  
CATTCCTGGTTCCAGCCTGTGTCCTTTT CAGCATTCTGATGTGGAAGAGAAGCTGCTTGCG  
CATGATTACTACGTTTGTGAGAAAACAGATGGTCTGCGGGTGTGATGTTTATAGTGATAAA  
TCTGTGACGGGTGAGCAAGGATGCTTTATGATTGATAGGGAAAATAACTATTATCTGGTTA  
ATGGATTTAGGTTTCCCAGATTACCCAAAAGAAGAAAAGAGCTGCTAGAGACTCTTCAA  
GATGGCACCTTATTAGATGGTGAAC TTGT CATA CAAACTAACCCAATGACAAAATTACAAGA  
GTTGCGTTATTTAATGTTTCGATTGTCTTGTCTATCAATGGTAGATGTCTCACACAATCACCAA  
CAAGTTCTAGACTAGCCACCTTGGAAAAGAAATTTTTTAAACCATACTTCGATTTAAGAGCA  
GCGTACCCTAATCGTTGTACTACTTTTTCCGTTCAAATTTCCATGAAACATATGGATTT CAG  
TTACCAATTAGTAAAAGTTGCTAAAAGTTTAGATAAACTACCACATCTTTCTGATGGTCTGA  
TATTTACTCCTGTGAAGGCACCTTACACTGCCGGCGGAAAAGATT CATTGTTATTA AAAATGG  
AAGCCAGAACAAGAAAACACCGTGGACTTCAAATTTGATTTTAGATATCCCAATGGTGGAGGA  
TCCTTCTTTGCC TAAAGATGATCGGAACAGGTGGTATTACAATTATGACGTTAAGCCAGTTT  
TCAGCTTATATGTC TGGCAAGGCGGAGCTGATGTCAATTCACGTTTAAAACATTTTCGACCAG  
CCTTTCGATAGGAAGGAATTTGAAATATTAGAAAAGAACATACAGAAAATTTGCAGAGTTGAG  
CGTTTCAGATGAGGAATGGCAAAATTTGAAAGAACCTAGAACAGCCATTAAATGGT TAGAATAG  
TAGAGTGC GCAAAAACCAAGAGACTGGGGCGTGGGAAAATGTTAAGATTCAGGGATGATAAG  
TTAAATGGTAATCATA CATCGGTGGTCCAGAAAGTTTTGGAGAGTATCAACGATTCAGTTTC  
ATTGGAGGACCTCGAGGAAATTTGTTGGT GATATTA AAAAGGTGCTGGGACGAGAGAAGAGCAA  
ATATGGCTGGTGGTAGTGGGAGACCACTACCGTCTCAAAGTCAAATGCGACATTATCTACC  
TCTAAGCCAGTCCATT CACAGCCCCAAGTAATGATAAGGAGCCAAAATATGTAGACGAGGA  
TGATTTGGTCGGATTAG

>YGL009C 0.78 Cold

ATGGTTTACACTCCATCCAAGGGTCCAAGA ACTCTTTACGATAAGGTTTTTGTATGCACATGT  
TGTCCATCAAGATGAAAATGGTTCCTTTTTTGTTGTATATCGACAGACACTTGGTT CATGAAG  
TCACCTCTCCACAAGCTTTT CGAAGGCCTAGAAAATGCCGGCAGAAAGGTCAGAAGAGTTGAT  
TGTACTCTAGCTACTGTAGATCATAATATTCCA ACTGAATCAAGAAAGAAATTTCAAATCACT  
AGACACATTTATCAAGCAA ACTGATTCGCGTTTACAAGTCAAACCTTTAGAGAATAATGTTA  
AACAGTTCCGGCGTCCATATTTCCGGTATGAGT GATGCCAGACAAGGTATCGTCCACACCATC  
GGTCCCGAAGAAGGTTTCACTTTACCAGGTACC ACTGTTGTTTGTGGTGACTCTCATACTC  
TACTCACGGTGCCTTTGGTTTCGCTGGCCTTTGGTATTGGTACTTCTGAAGTTGAACACGTCT  
TGGCCACTCAAACAATTATCCAAGCTAAATCGAAAACATGAGAATTACTGTTAATGGTAAG  
CTATCACCTGGTATCACATCTAAAGATTTGATTTTGTATATATTGGTCTGATAGGTACTGC  
AGGTGGTACTGGTTGCGTTATTGAATTCGCAGGTGAAGCCATTGAAGCTCTTCTATGGAAG  
CACGTATGTCCATGTGTAACATGGCCATCGAAGCTGGTGCAAGAGCAGGTATGATTAAACCA  
GACGAAACTACTTTCCAATACACCAAAGGCAGACCTTTGGCTCCAAAAGGTGCCGAATGGGA  
AAAGGCTGTTGCC TACTGGAAA ACTTTGAAAACAGACGAAGGTGCCAAAATTTGACCACGAAA  
TCAACATTGAAGCTGTGCGACGTGATTCCAA CTATTACATGGGGTACTTCTCCTCAAGATGCC  
TTACCAATTACTGGTTCCGTACCAGATCCAAAAAATGTTACAGACCCAATAAAGAAATCTGG  
TATGGAAAGAGCCTTAGCCTATATGGGTTTGG AACCTAACACACCCGCTAAAGAGCATCAAAG  
TAGATAAAGTCTTTATTGGATCTTGTACCAATGGCCG TATTGAAGATTTAAGAAGTGCTGCA  
GCTGTAGTTAGGGGTCAAAAATTTGGCTAGTAACATCAAATTAGCTATGGTTGTTCCGGGATC  
TGGTTTGGTCAAAAACAAGCCGAAGCAGAAGGTTTGGACAAGATTTTCCAAGAAGCTGGTT  
TTGAATGGAGAGAAGCTGGTTGTTCAATATGTTTAGGTATGAACCCTGATATTTTGGATGCC

TATGAACGTTGTGCTTCTACTTCCAACAGAAATTTTGAAGGTCGTCAAGGTGCCTTGTCTCG  
TACACATCTAATGTCCCCAGCCATGGCGGCTGCTGCAGGTATCGCAGGTCACTTCGTAGATA  
TTAGAGAATTCGAATATAAGGATCAAGACCAAAGTAGTCCAAAGGTTGAGGTCACTTCCGAA  
GATGAAAAAGAGCTTGAAAGTGCTGCTTACGATCACGCTGAACCTGTCCAACCCGAAGACGC  
TCCCCAAGATATTGCCAATGATGAATTAAGATATTCCAGTGAAGTCAGATGATACACCTG  
CTAAACCTAGCTCTTCCGGCATGAAGCCATTTTTGACTTTGGAAGGTATTAGCGCACCATTA  
GATAAGGCCAATGTTGATACAGACGCTATTATCCCAAAGCAATTTTTAAAGACAATTAAGAG  
AACGGGTTTGAAGAAAGGGTTGTTTTATGAATGGCGTTTCCGTAAAGACGATCAAGGTAAGG  
ATCAAGAAACCGATTTTTGTATTAAATGTTGAACCTTGAGAGGAAGCTGAAATATTGGTTGTT  
ACTGGTGACAATTCGGATGTGGTTCTTCCAGAGAACACGCACCATGGGCTCTAAAAGACTT  
TGGTATAAAATCCATCATTGCACCTTCTTACGGTGATATTTTCTACAACAACCTTTTCAAGA  
ACGGCTTATTACCTATTAGATTGGATCAACAAATAATCATTGACAAATTGATCCCTATTGCT  
AATAAGGGTGGTAAGCTCTGCGTCGATTTACCAAATCAAAAAATTTTGGATTCCGATGGCAA  
TGTGCTCGTTGATCATTTTGAAATAGAACCTTTCAGAAAGCACTGCCTAGTTAACGGTCTTG  
ATGATATTGGTATTACATTGCAAAAGGAAGAATACATTTCCAGATACGAAGCTTTGAGAAGA  
GAGAAATACTCATTCTTGAAGGTGGATCAAAATTTATTAATTTTGAACAACGTTCCAAAAAG  
AAAAGCTGTTACAACACTTTTCGATAAAGTCCACCAGGATTGGTAG

>YOL118C 0.79 Cold

ATGTCTTTTAGAAAGAAAAAACTCAAACCTCCAGCGGGTAGTCAATTTATTATAAACGACTC  
CATAATGAGCTATATTGACCGCACGAAAAACCTAATAAGGATGATTGGATGCAAGAACCAGT  
ACATAAAAGCACGTATGAAAGATAAGACCTTCTTCTATACGAAGCAATTCGGTACAGCCAAA  
AACAAATTTTTCTTTCATCTGTACCATTGGGAGGCCACTCATATTAACGTTGACCACTATAT  
ATGTACATGTCATCCATTTTTTTGGGGCTCTATAGGTCAGAAACTCAGGAGATCCGCCTGA

>YNL183C 0.71 Cold

ATGTC TTCATTAAC TCGATTGCTACAGGAAAAACGAAAAAATGAAACTTCGAACTCATCACC  
GAGAACTTCTGCTGATACGTTGACCACGACGCCGAGTCACAATCGCTTGACCTTCACTCTA  
GGAATAAGAGTAGTAGTCATATTGGTAGCGTGAGTAATAGCAGCAGTAGTGATCGTAATAGG  
GCTAACGTGCCAGTTCCTGGCAGTGTCACAACTGTTACTCAAATATACTCAGAGGAAGATT  
ATCATCAACAGCCGGTTCCTCTCTCGACGATAGGAATCAGTTTTCTCCAGCTTCCCTTAATG  
CAAAC TTTGCTCACACTGCATCATTCTACGGCACAAGTGCACAAAGTAGAGATAGATTTGGA  
TCC TTAATAAACGATCAAGGTACTGCAGGACTTTCTCACATGGTGGTTCTTTTGGCTGCACA  
GAACAGAATCACAAGTAGATTATCTACCACGTACATACTTCAGGAAGGGCCATTCCCTCTT  
TATCATCAAGTATACCTTACTCCGTGCCAAATCTAACAAGATAACAATAGCTCGAATAGC  
AACAGCTCCTCTTTGTCTTCTTCGTGGCTCGAAACATATGCAGGCGGTATGCCAATAATAT  
TTCTGCAATCGATTCAAATGTTATATCCTCCCCAAAAGTAGATAGCGTGGAACCACGTTTTG  
TTATCTCCAAACAAAACTCCAAAAAGCATCGATGGATAGTAATAATGCAAATGCCACTCAA  
TCAAGATCTATATCCCGTTCAGTTTCACTCTCTTTCACAGCTTGGGAATTTTTCTTTTCCAA  
AAACTCAAAGAATCTTCAAATCTAACTCTGCAGGCATGTCTTTTTCTGCCAATTTCCAATG  
GTCTTCTCCAAACATTAAGAATCCCAATGTTACCAATGGTTCGACGCCTATCCCGAAGCCT  
ATCCGCGCAAGACAAAGCAGCATATATTCTGCATCAAGACAGCCAACCTGGTTCCCTATACTGA  
TAACTTTTACGGTTCCTCCATCTGTACATGACCACTTACCTCCAAGTCAAAGTGTCCAA  
GGTCAACAACATCTTCCATCGGTGATTTAAAGAGGTTCTTCAAAAAAGTTCTAACAGTAAC  
CTTCTCCTCGAATAGTAACAACGTGATCCCGAACGGATCACCTCTTCTAGCGGAATTGCCGT  
TCCGTCACTCTCATTTCATCGTCTCATTGTCGCGAGGGAATAACTCATATTTCCACTAGTT  
ATAACGGAAATGGAGATACTATTTATTCTCATAGTCACGGCGGTTTCAGGAATTCGGTTCTCA  
AAAAGGTACATCAAACCGGTGCCGATTTAGGCGCTGGAGCAGGAGGTTCTGTCAAATTAGC  
TCAAAGAATTTAGATAACAAAATATTTGCAGTGAAGGAGTTTAGAACTAAATTTGAAAATG  
AATCCAAAAGAGATTATGTCAAGAAAATTACATCAGAATACTGTATTGGTACAACCTTTGAAT  
CATCCCAATATCATGAAACAATTGAAATCGTGTATGAAAATGATAGAATTTCTCCAAGTTAT  
GGAATATTGTGAATACGATTTATTTGCTATTGTAATGAGTAATAAAATGTCCTATGAAGAGA  
TTTGTGTTGCTTCAAACAAAATACTTACTGGTGTACAATATTTGCATAGTATCGGCTTAGCT  
CATAGAGATCTAAAGCTAGATAATTGTGTTATAAACGAAAAAGGTATTGTAATAATTAATCGA  
TTTTGGTGTGCTGTGGTATTTTCATATCCATTTCTCAAAAAATCTTGTGGAAGCAAGTGGAA  
TTGTTGGAAGTGATCCATATTTAGCACCTGAAGTCTGTATATTTGCGAAGTATGACCCACGT  
CCCGTAGATATTTGGTCTTCTGCAATCATTGTCATGTATGATACTGAAGAAATTTCCATG

GAAAATTCGGAAATTAAGGGACAATTCATTCAAACCTATTTTGTTCGGACGTGATTGCGACT  
 CCTTAAGTAGCTTGGTTACAAGAACTCCTGATCCACCTTCTACGATGAATCGCACTCAACA  
 GAAAAGAAAAACCCGAAAGCTCTTCCAATAATGTATCAGATCCTAATAATGTTAATATCGG  
 GCCACAAAGATTGTTGCACTCATTACCAGAAGAGACTCAGCATATTGTTGGACGTATGATTG  
 ATTTGGCGCCCGCATGCAGAGGAAATATCGAAGAAATCATGGAAGATCCTTGGATCCGTAGC  
 ATTGATATGTGCCACTTGGTTGAAGATGGATTATCGTTCAAAGTGGTTAGAGGAGAAGACCA  
 TCATCACACACAAGTGGATCAAAGTGAAGCACATATTGCAGGCCTAGAAAAGAAAAAGAAA  
 AGCAAATAATCAATAA

>YDR237W 0.81 Cold

ATGCAAAGGTTTTCACTAGTCACTCACAGATCATTCTCTCACTCCTGTGTGAAGCCCAAATC  
 TGCATGCTCTTTGGTCAAACCAGTTCATCACTTGGTGAAAATTGATAAGTCAAAGTTATCCC  
 CTAGATTTCCAGAATTGAAATATGACAAAAGTGATATTAGGTACCTGGATTTAAACCAAAA  
 GACACTCATGCAGATAGACTCAATGACCATTACCTTAACACTTTACAATCTGATTTGTTATT  
 GATTAATTATTACATAACGCTGCGGTGGTAAAGGGTCTAAAACAAAGAGCGTGGAGTGGTG  
 ATTCGCCATAACCATTGAACAGACCACCGAAAAATCCTCGAGGTTGAAAAGCTCAACTACCT  
 GACATTCATCCTATCAAATGGAGTAACATTCTGGGCTAGAAAAGTGTGTAATAAACTGTTT  
 TGTTAGGGAAGCGAGAGAAAATCAGCTATTGGCTATCACCGCTGCGTTACAATTACAACAAA  
 TTACTGGATGTAACCTCATCCAATTTTTTCCAAAAATGATGTTCCAACCTGGAACTGAGA  
 AAAGTTCATCAGATGGGAGCTAAAGTCGAACTAAAGGGAAAAGAAATGTCTCAGTTCCTAAG  
 CACATTGACCGAAATCGTCCTACCAAGAATCAGAGAATATAAAGGTATAAGCAACCAGTCTG  
 GGAACAGATTTGGTGGGATTAGTTTCGGCCTGACGGCTGAAGATATCAAATCTTCCCTGAA  
 ATCGATGCAAACCAGGACTCATGGCCTAAAACTTTTGGTATGCACATAAATAAACACCTC  
 AGCTCAATTAGATTACCAGGCGAGAACCTTGTGAGTGGGTTCCAGTTCCTATTTTTCGGAG  
 AGGAGAAATAA

>YOL144W 0.8 Cold

ATGGATAGTGTAATTCAAAAAAGAATTTTTGTTCGGAAATATTTTCCATAATGCAGATGATTG  
 TTATTCAGAACTACTAGATCGATTTGGAAAATTTGGTGAATGCCAAGATTTTCAGTTTGA  
 AACACAACCCTTTGCATTTATCGATATAAAGTTTAATGATGAGGCAGATTTTAACAAGCTA  
 AGAAAGAGCTTTAATAATGTTAAGTTTAAAGGGAACATTTTGAAGGTTGATGAAGCAAAGCC  
 GAATTGGGAAAGCACCTGGGCGGTACAACATGCAAAGGACCTTAAAGAAGATATTATACTAA  
 ATGCTAAAATGAAAAAAGAATTGGCAACATTATAAGAAAATGGAAAATGTAGCGAAAAGT  
 TGGAAAGATCATAAGGAAGTTATTGCTGGCAGAATGAGGGAGGCGCCGAGAAAAAGGAGTCA  
 ATTGAGGAACATTACATTCAGGATCAATGTCAATGGTTCATTGAAAGTTTACAAATGCTATA  
 AGACTAAATTATGGGGTTATGAAAGGAACAAAGAATTGAATGACCTTGTGTACAAGTTTACA  
 AATAATTTCTGGAAAACCGGATACAACCACATTTGTTCGATAGATTGGATTACAGTCGTGCTGT  
 TAAAACCTGTTTCGATTCAAAAATGGGCTGAAACAGTTAACAGTGTCAAAGATGAAAACGTTT  
 GCAGTGGAGAGATGGACAGCGATGAGAATATGTCAGAAGAGGAGAAGGAGAAAAATAATGTT  
 ATCTTAAATGACCTATTAAGGACTTTGACTTCGATAAGCCAATGACGTTGAATGATTCGGA  
 CGAGGAACCTCTGACAGAGCAACGTAAAGGAGAGGAAGAAGAAGAAGAAGAAGAAAAAAG  
 AAGTAAACGCTCCCGAATACGAGAATGTTAATAAGACGAAGGACCAGAGCACCCCTACCACAA  
 GAAAACCAGAGGAAAGGAAAGAACAGGACGAGGGCGACGGCAGGAGGATAATGAATTTAT  
 TCCGACTTTCACCAAGGAAATGGTCAAGGTACAATAAGCAACACTGAGACGTTAAGAAACC  
 TATTCAACCCCAACGAGGCAGAACCTGTATCACAATTCAAATTGATTGAAGATTCTGATAAT  
 GATATTGATCATGCGAAAGATGTTGATGTGAACCAACTGGAGGAAGAAGTAAGTAAATCATC  
 TGACACCCTAGGTTTGACATCGGCTCCCGTACCACATGTATCTAGAGATAAAGATAACAAAA  
 ATTTCTTGTTTTTCCCTCATTTGCAATCGCCATTTTTAGTAGGACAAACACAGTTGAGTAAA  
 GTAAGGGCTCCTGGAAGAGAAACAATGCTATCGAACTGGGATGAGGAGTCTGGGCTAACAG  
 AGGTAATTGGACCCGTGATATGAGGCGCAAAAATGAAAGATGCATTGAAGCACCGTAAGAGGA  
 AACAAATCAAAGAGCGGGCTTCTTCTATAG

>YJR096W 0.78 Cold

ATGGTTCCTAAGTTTTACAAACTTTCAAACGGCTTCAAATCCCAAGCATTGCTTTGGGAAC  
 CTACGATATTCCAAGATCGCAAACAGCCGAAATTTGTGTATGAAGGTGTCAAGTGCGGCTACC  
 GTCATTTTCGATACTGCTGTTCTTTATGGTAATGAGAAGGAAGTTGGCGATGGTATCATTAA  
 TGGTTGAACGAAGATCCAGGGAACCATAAACGTGAGGAAATCTTCTACTACTAAATATG

GAATTCGCAAAACGGATATAAAAAGAGCTAAAGCTGCCATTCGGCAATGTTTGAATGAAGTCT  
 CGGGCTTGCAATACATCGATCTTCTTTTGGATTTCATTCGCCACTGGAAGGTTCTAAATTAAGG  
 TTGAAACTTTGGCGGCCATGCAAGAAGCGGTTGATGAAGGATTGGTTAAGTCTATAGGGGT  
 TTCCAACATATGGGAAAAAGCACATTGATGAACTTTTGAAGTGGCCAGAAGTGAAGCACAAAGC  
 CAGTGGTCAACCAAATCGAGATATCACCTTGGATTATGAGACAAGAATTAGCAGATTACTGT  
 AAATCTAAAGGCTCGTCGTCGAAGCCTTTGCCCCATTGTGTCACGGCTACAAAATGACTAA  
 TCCAGATTTTATAAAAGTTTGCAAAGAGGTGGACCGTAATCCAGGTCAAGTTTTGATTCGTT  
 GGTCTTTACAACACGGTTATTTACCACTACCGAAGACTAAAAGTGTGAAGAGGTTAGAAGGT  
 AACCTTGCAGCTACAACCTTTGAAGTGTGAGACGAACAGATGAAATTTCTTGATCATCCTGA  
 TGCTTATGAGCCTACCGATTGGGAATGCACAGACGCGCCATAA

>YGL186C 0.72 Cold

ATGAATAGGGACAACATGGACACAACAAAGCGCAAAGAAGATCATACAAAGCATACTACTGA  
 TGTAATAGAATTTTACGAAGAAGGAACCGCAGCTTCTTCTTTAAACATAGCCACAGAAAAGG  
 CCAACTCAAGTCCGTCCATTTTGGAGAAGAAATTATCAACAGGGCGGCATGGCTTTCTAAGAAA  
 GTGGACGCAATGGGAGTAGAGTCTACCGGTATTCAGAGGATATCTCCCTATGAACGAGGAAC  
 ATCAAAGAAAACAATTTTTGCATGTCGCGGGGCTATGGTTGAGTGCCACAGGTGGTTTTGTCTT  
 CCATGTCGTCGTTTTTTATTAGGCCCTCTGCTTTTCGGTTTAAAGCTTTAGAGAATCCGTAGCC  
 TCCAGTTTAATATCGGTAACAATTGGTTGCTTAATTGCTGCCTATTGCTCGATCATGGGACC  
 GCAGTCCGGTTGCAGACAGATGGTAACAGCTAGATACCTGTTCCGGATGGTGGTTTTGTTAAAT  
 TAGTTGCATTAGCTTCCATTATCGGTGTGATGGGTTGGTCTGTGGTTAATTCGGTGGTTGGG  
 GGTGAAATGTTAGCTGCTATTTCTAATGATAAAGTACCCCTATGGGTAGGGATTGTCATAGT  
 GACCGTATGCTCCTTTTTTAGTTGCCATTTTTCGGTATCAAACAAGTCATTAAGTGGAAAATT  
 ACTTATCCGTACCCGTCCTGACAGCATTTTTACTACTGTACATTTTCATCAAGTGATAAATAC  
 AGCTTCGTCAATGCATACGTTTCAAAGGGAAAATTTGGACTCTTCCACCCGAAAGGGCAACTG  
 GATGAGTTTTTTTTTTCATTATGCTATAGTATTACGGCTACTTGGGGGTCTATTACAGCAGACT  
 ATTATATATTGTTCCAGAAAGATACACCATATATTCAAAATTTTTTGCCTAACGTTTTTTTGG  
 ACATTTTTTGCTTACCTGTTTCGTCGGAATCTTAGGTCTCTTACTAGCTTCTGTTGCCATGTC  
 GTATAAGCCTTGGTCAGTCGAGTACGATTCCCATGGAATGGTGGTCTACTTTGGGCAGGTT  
 TTCAGCGTTGGAACGGCTTCGGAAGTTCTGCGTGGTAGTACTGGTATTCAGTTTTGGTATCC  
 AACACATCATCAATACGTATTCGGCAGCATTTCTCCATCCAACCTTTCTAGTGTGTTTTGTGC  
 AAAAATCCCTCGCTGGTTCTGGTCTATTGTTTGTACTATAAATTTGTTTGGTATGCGCATTA  
 TAGGTCGTAATCATTTTTAGTACTATTTTTGGGAAATTTCCCTACCAATGATAGGCTACTGGATT  
 AGCATGTACTTTATCTTATTATTCGAAGAGAATTTAGTATTGAGAAGGTTTTTCTTACATTT  
 GTACACCAAAGAGTTTTCTACAGTTACAGGAGAAATAAATGGACCGGAACTTGTTGGATCTT  
 CAAAAGAAGTGGAGAAAGATGCAGTTACTAATATCCATTTGTTAAAAAGAAAACATAAGGTG  
 ACTAAACATCGTTACAATTGGGACAAATGGGAAGATTATGAGGTTTTAACGCACGGTTATGC  
 AGCAACATTTGCGTTTTATTGTAGGAGTTGCTGGTGTGGTAGTTGGTATGGCGCAAGCCTATT  
 GGATTGGCCCAATTGCTGCCAAATTTGGTGAATATGGTGGTGTGTCGCAATGTGGTTAAGT  
 ATGGCGTTCTCAGGTGTTGTATACCCTCCTGTAGATACTTAGAGCTACGTAAATTTGGTCCG  
 TTAA

>YDR264C 0.73 Cold

ATGGTGAACGAATTAGAGAATGTGCCACGGGCGTCGACCTTGACGAATGAAGAGCAAACGGT  
 TGATCCTAGCAATAACGACTCACAGGAAGATATTAGTCTGGGTGATTCTAACGAAATTACTT  
 CGTTGGCATCATTAAGGCTATCCGATCAGGAAATGAAGAGGAAAGCGGGAACGAGCAGGTG  
 AATCATAATGATGAGGCCGAAGAAGATCCTCTGTAACTCGCTACCATAACCGCTTGCCAAAG  
 AGGTGATCTAGCGACTGTCAAAGAAATGATACATGGAAAGTTGCTCGAAGTTAATAACGACG  
 GTGACTCTACGGAACATATCACTGGTTTTGCATTTGGGCAAGTATTAATAACAGACTTTCTGTA  
 GTGGATTTTCTAGTTTTACAAGGCGCTGATGTCAATGCAAGGGCTGGTGCCTTGCATGCCAC  
 ACCATTACATTGGGCTGCAAGGTATGGGTACGTGTACATTTGTCGATTTTTTGTCTTAAAGCATG  
 GAGCTGATCCCACCATGACCGATGACCAAGTTTTCAATCTACTACACTTATCTGTGAACAGC  
 TCAAATATAATGCTAGTTCTATACGTTTTTATTCACGTTGTCAGCAAAGGTCCTTTTAGATAT  
 AGATTGCCGAGACCCAAAGGGCAGAACTTCACTACTATGGGCTGCTTACCAGGGAGATTCCC  
 TAACTGTAGCAGAAATTGTTGAAATTTGGTGGCAGCATAAAGATCGCAGATACAGAAGGATTC  
 ACCCCACTGCACTGGGGCACTGTAAAAGGGCAACCACATGTACTAAAATACTTGATTCAAGA  
 TGGTGCAGATTTTTTCCAAAAACGGATACCGGAAAGATTGCTTTGCTATTGCTCAAGAAA

TGAACACTGTGTACTCACTTAGAGAGGCTCTAACACATTCTGGATTTCGACTACCATGGTTAT  
 CCCATTAATAAAATGGTTCAAAAAAGTCAACATGCTAAGCTCGTTACATTCATAACGCCATT  
 TCTATTTCTAGGAATCGCATTGCTCTTTTCTCTCATATTAACCCTTTGTTTGTAATCATTG  
 TCCTTTTTTTTATTGGCCATTGCCACTAACAAAGGCTTGAACAAATTCGTTCTGCCGTCATAT  
 GGACGAATGGGTGTCCACAACGTTACCTTGTTAAGGTCACCTTTGTTATCCGGTGTTTTTTT  
 TGGCACTTTACTTTGGGTGACTATCGTTTGGTTTTTCAAAGTTATGCCTCGAACATTTTCTG  
 ATGAACAATATACTAACATCCTAATGCTGGTAATACTTGTCTGTATTTTACCTTTTTGGG  
 CAGCTTGTTATTATGGACCCAGGATGTTTGGCAGAAGAACTGATCATGAGAACGTGCGACA  
 AACAACTCTCGAACTTGCTCGAAATCGGTAATAATTTGATACGAAGAACTTTTGTATCGAACTT  
 GGATTAGAAAACCTCTAAGAAGCAAATTTTCGCCCTTAAACAATGCTGTGGTTGCAAGATTT  
 GATCATTACTGCCCTTGATCTTTAATGATGTCGGACTCAAAAATCACAAAGCATTATATATT  
 TTTTATTACATTAATGGAAAGTGGTATTTTTCACATTTCTTGCCTTTGCTGGAATATTTTG  
 ATGAACTTGAAGATGCACACGAAGATACATCCAGAAAAATGGCAAATGTTTCATCCTAGGC  
 GCTTCAGATCTCTGTTCCGGATTAATATATGATAGATTTGTCTTTCTGATATTATTATGGGC  
 TTTACTCCAATCTATTTGGGTGCAAGTTTGTATCTTCGTCCAAGCCTTTCAAATATGTAAG  
 GAATGACCAATACAGAATTCAAATGTTTTGTATGAAAGAGAGTAAGTCCATTGGCCCCGATGGG  
 TTATCTTTCAATGAAAACCTCAATACTACTCCAGAAGGATTTGCGCCGTCGATTGATCCGGG  
 TGAGGAGAGTAATGATACTGTACTAGCACCAGTCCAGGCTCAACGATAAGGAAACCACGCA  
 CTTGTTTTGGCGTTTGTACGCGGTGACTGGTATGGATCAGTGGTTAGCGGTTATAAAAAGAA  
 ACCATTGGCATCAAGGATAGCACCAGGACATAATGTGTATTCGATTACATCAAGAATACCAAC  
 AAATTACGGTTGGAAAAGAAATGTTAAAGACTTTTGGCTTACAAGCGATATAAATGCGCCTT  
 TGTGGAGGCGAAATTTGTATCCTCCTTCGGGCTCTAAAGCTTTGCTCAACGGGATAGAAGTT  
 GACTATTTTAAAGCTTTACAAAATGCCAAATAAGGATGTTGAACAAGGAAATGATATGGTATG  
 A

>YAL010C 0.81 Cold

ATGCTACCCTATATGGACCAAGTACTAAGGGCATTTTATCAGAGCACCCATTGGAGTACGCA  
 AAATAGCTACGAGGATATAACGGCCACATCGAGAACATTATTAGATTTCCGAATTCCTCAG  
 CAATACACCTGCAAATTTCCAACAAATCTACTCCCAATACATTCAATTCCTTTAGATTTTTCT  
 ACGAGGTCCAGGATAAATGGTTCTCTGAGTTATTTATACTCCGATGCACAGCAATTGGAGAA  
 ATTCATGCGCAACTCTACTGATATCCATTACAAGATGCCACCGAAACATACAGACAATTGC  
 AACCAAACCTCAATTTTCAAGTGTAGTAGTGCGAATACGTTGAGTAGTGACAACACCACAGTC  
 GACAATGACAAGAAATTACTACATGACTCGAAATTTGTTAAAAAATCCCTTTATTATGGTAG  
 AATGTACTACCCAGCTCTGATTTAGAAGCAATGATAATAAAACGACTAAGTCCACAAACCC  
 AATTTATGCTTAAGGGTGTGAGTAGTTTCAAAGAAAGCTTAAACGTTTTAACGTGCTATTTT  
 CAAAGAGATTCTCACCAGCAATTTACAGGAGTGGATATTTTCCACCAGTGATCTATTATGTGG  
 TTATAGAGTATTACACAATTTCTTACCACGCCTTCCAAGTTTAAACACCTCACTGTACAATA  
 ATCTTTCGTTGTCGCTTGGTGCTGAATTTTGGTTAGGGTTAGTAAGTTTAAAGCCCGGTTGT  
 TCGACAACCTTAAAGATATTACACACATTCTACAAACACAGGACGACCACTAACTTTGACATT  
 ATCTTGGCAACCATTTATTCGGCCATATATCCTCCACATATTCGGCCAAGACAGGGACAAATT  
 CTACTTTTTGCGCGAAGTATGATTTTAATCTTTATTTCGATTGAATCAAATCTTTCATTGTTGG  
 TGCGAATTTTGGCAAAAAAAGCATCATTTGCTTGAACCAATAAAAAACAATAATGATAAATT  
 AGAACCAATCTCCGACGAATTGGTTGATATAAATCCAAACAGCAGAGCGACTAAACTACTGC  
 ACGAAAATGTACCGGATCTGAATTCAGCTGTTAACGATATTCCTTCTACACTAGATATACTT  
 GTTCACAAACAAAAGCTATTAAATGATTTAACTTATGCATTCCTCGTTCGTCATTAAGAAAAAT  
 CGATGAAGAAAGATCTACCATCGAAAAATTTGATAACAAAATAAATAGTCCATTTTTACCA  
 GTGTTTGGAAATTAAGCACGTCATTACGTGACAAGACTTTAAAACCTATTATGGGAAGGCAAA  
 TGGAGGGGATTTTAAATATCTGCCGGGACAGAGCTGGTATTCCTACTAGAGGCTTTCAAGAAAG  
 TTTATCCGATGATGAAAAGAATGATAATGCAATATCTATATCAGCAACTGATACAGAAAACG  
 GCAATATAACCAGTTTTCCCGGCAAAGTTTGGCATAACAATTCAGTACTCCACATGA

>YNL329C 0.67 Cold

ATGAAGGCATCGCTTACGTTTAGTCTCTCCGGAATATACGCCCCCTGTAGCATTCTAGGGA  
 TATATATCTCGAATACGGCGATAAAAAAGCTGAATGTTTATATGGGACAATTAGATTGCCTC  
 AGTACGGTCCAGGTTGCACGCCTGGTAAAAATGTACATTGTGTCTGGATGATTCCTGCCC  
 TTCTGTAGCATTGTTGTACCTTCCAACTTTTTGGGTTTATGCCGACACAGCCCCTATGGA  
 TTTTGTCTATTTGAACCCATATTAGACAATGTAGTACCTGTACTGGATAGCGTAACGTTTC

TGATTAATGAACAATTGTACTCAAACCTAATGGACCTACCGCAAGAGATGCAACAAATACAA  
 TTTTTCATTACAAATATAACATCAACTCCATGGAAACCGTGGTTCATTCGAGATATTTT  
 AACATCTGGTCTTTGCCAAATTTTAAACTGCTCACCTTTCCCGCAGGGCCTTGTTGATTTA  
 CAGAAACCCAATTGATATTAGTAAATGATACTGAGCAGAACTAAGTGCTCTAAAATATGCT  
 AACGAAGATGAAGAATATGCATTACCTAAAATAGGGACAAATTTCTGCTTATCAATTGATCT  
 TGAATCTCTCCCTGCACAATTTCAAGAGATCTTTTGGCAGCTGCACCTCACATCAATGATG  
 ATAATTCATATATGCCTTTACAGACGCTGAAACTCTACTGCGCCTGGATGTCACAAGTGGA  
 TCGTTTATAACAGTGTCAAATATGGGTTGCGTCAGGCTAGTTAAGCTGTTGTTTTACTACT  
 CCCAACGGCTTTAAAAAAGAACAATATACGCACCTCCAAAATAATAGCAAGCTTTCCAG  
 ACTGCAGCGTCGTGACAATATCAAAGTCCAATATAGGCCATACAGATATTTCCATTGCTAAT  
 CAAGTTTTTCATCTCAAGAGTTGGAGGCTGGCTTCAATCTCAGAAATGCTTCAAATAATTAT  
 TCTAACACCTTGAAAAAGTTTTTTAGCGAGAGCAAAAGGATTCTTTGTCAAAATGATTTAA  
 TCCCAATCGCTTTTGATTCAAGTATGGCTGATCTCAATATAGCAGAGGAAAATGATGAGTCT  
 GATGACGAAGATGAGCTAGGGCAGTACTACAAGAACGATTCCCTTGTATGGTCTTTGTCAC  
 AAGCGCAGAGCTCGATTGCTTCTCTAAAGATAATTCTCATTTTATTATTGATCCCAATCGGA  
 CGAAGCTAATAACAACATAATACACTAACAGAAGACCATTACCCTTGAGTAGATCCAATCTT  
 CAGAGATATTACGGTTTTGCTGAAACTTTTTACTATGATTTGCATATCTTCCCCTATGTAAG  
 ACAATTGGTTAACATATTAGAACTTCCCTTCAATTGTTCTCAAAGGGGAATCACCTAAATG  
 CCTCTGTGTTACTTCAATCCACTACAAACAATGTGGGCAAGGCTACAATGGTGAGATTTGCT  
 TCAAATATCTTGGTATACATCTACTGGAGATAGATTGCCTTTCGCTCACTTCAAATCAAG  
 ACAACTGGATTCAACATCTAAGATTATTGGTTACATTAGGGCTAAATGTGAAAATGTCCCTAC  
 CGTACGCATCACCTGCTGTGATTTTTTTGGCTCATTTGGATTCAATTTTGCTTGACGTAAAC  
 GCTAATCAAGATCCAGAGGCAATCAAATTACAAAATCTATAAACTTCGAAATGTCTAAACT  
 TCTGGACGATTTTACGTTTTAAATTTCCAGGAACCTACATTTGTTGGCTCCGTAATAACATAG  
 ATAACGTGCCTTCCAGCTTTAGATCACATATGAGATTTGAGATTCTCGTACCCGTTCCGTCT  
 GAAGCACAGAGACTGCGTATCTTTCAGTGGTACTTATCTTCACATGAACTAAACAGAGATGT  
 TCAACAAAAGGTTCCAGTATCTTACATGGATAATATTTTCATTTTCATCACTCTCTTCATATT  
 CTGCTGGTTTTAACTCCTTTAGACATCAAATCAATTGTGGAAACGGCACGAATGACGGCTACT  
 GCGGTTTTTTACCAAGAATCAAAGAAGTGTGGATGGCTTCCGCAATCAATTTTGATCACTCA  
 GGAGGATTTATCAAAGCTACTTCGAAAGCTAGGAACGAATTTCTCGGTTTCGATTGGTGCCC  
 CACAAATCCCTAACGTAACCTTGGGATGATATAGGTGGTATTGATTTTGTAAAGGTGAAATA  
 TTGGACACAATAGACATGCCGCTAAAACATCCTGAATTATTTACCTCAGGTATGAAAAAGAG  
 AAGCGGTATTCTTTTTTATGGTCCACCGGGTACAGGTAAACTCTAATGGCTAAGGCCATTG  
 CAACAAATTTTTCTTTAAATTTTTTTAGTGTAAAGGCCCTGAACTGTTGAATATGTACATT  
 GGTGAGAGTGAAGCTAATGTGCGCAGAGTGTTCAAAAGCGAGAGAGGCTAAACCTTGTGT  
 CATATTTTTTCGATGAAATCGATTTCAGTAGCACCCAAACGTGGTAATCAAGGTGATTCGGGTG  
 GTGTTATGGATCGTATCGTTTACAGTTACTAGCAGAGTTAGATGGTATGAGTACCGACGCT  
 GACGGTGTATTTGTTATCGGAGCAACAACAGACCAGACTTATTGGACGAAGCACTACTAAG  
 ACCAGGACGATTCGATAAATGTTATATTTAGGCATTCCGGATACGGATACCAACAATTTGA  
 ATATTTTAGAGGCTCTGACTCGCAAATTCGTGCTCGACAACGACGTAAAGCTTATTGAGTTG  
 GCAAAGCTATGTCCATTTAATTACACCGGGCAGATTTTTTATGCTCTCTGCTCAGATGCAAT  
 GCTTAACGCCATGTCAAGAATGCACGCATGGTAGAAAAAAGTTTTCTCAGCATAACGAAT  
 TGACGGGAGAGAAATTTTCTACACGTCGCTGGTTTGATAAGATTGCGACAAAAGAGGACT  
 AAGGTTGTCTGTAATAATGGAAGACTTCTTGAAGCACAAAGAGCAGCTCACCCCAAGGTGTC  
 CGGGCTGAACTGAATCATTATGAAGCGGTGAGAGCTAATTTTGAAGGTGCTTAA

>YDL037C 0.77 Cold

ATGAGCCAACAGAATATACTACATTATGATATGGATGTTACTTCCGTATCATGGGTCAAGGA  
 TAACACATAACCAGATTACTATTCATGTCAAAGCCGTAAAAGATATCCCTTTGAAATATTTAT  
 GGTCTTTAAAGATTATTGGTGTCAACGGTCCCACAAGCACCGTACAACCTTTACGGCAAAAAT  
 GAGAAGACATAACCTAATCAGTGATCCAACAGATTTTACATCCACTTTTCAGGTTTATGCTTA  
 CCTTCTTCTGACGGTTGCACAGTTTGGATGCCAAATTTCAAATCCAGTTTCGAATATCTAC  
 AAGGTGATGCTGCTCAGTACTGGCAAATTTGGCAATGGGGGACAACCCTTCGATTTATCG  
 ACAGGTTGTAACAATTATGACAATCAAGGCCACTCACAAACGGATTTCCCTGGATTTTATTG  
 GACCTACCAGTGCAAGGGAAAACAATGATGGCACTTGTACAAAAGCCTCGTCTTCATCCATTA  
 CTACTTCATCCATTACTACTTCATCCACTACTACTTCATCCACTACTACTTCATCCACTACT  
 ACTTCATCCTCTACTACTTCATCCTCTACTACTTCATCCTCTACTACTTCATCCTCTACTAC

TTCATCCTCTACTACTTCATCCTCTACTACTTCATCCTCTACTACTTCATCCTCTACTACTT  
 CATCCTCTACTACTTCATCCTCTACTACTTCATCCTCTACTACTTCATCCTCTACGAAA  
 ACTTCCACTACTACGTCATCTACTGTGAAAAGCTCTTCCACTACATCCATTGATTTTACTACTTC  
 CGTTGACTCACATACTTCATCAAGCGTAGCCGATATTTATCGTTCAAGAACATCTACTGATG  
 TCACCACATTAGCAGCTTCAACTAGTCCTTTCAGCAGTTTCACTTCAAGTGACTCTAGTAGT  
 TCAAGCGATGTAACCAGTTCAACCATTCAAACACTTTCTGTTGATCCAACCCTTAA

>YFL025C 0.82 Cold

ATGGGTATCAGGAGATTAGTTAGTGTTATAACGCGGCCATAATTAATAAAGTTAACTCATC  
 TGGTCAATACTCGAGAGTACTCGCTACGCGTGAAGACCAGGATAAAGCTTCCCCAAATATA  
 TGAACAATGATAAGATAGCAAAAAAACCTTACACATATCGCCTTTTCTCTATTCTTGGCATT  
 TTAAGCATTGCTCGCTTTTATTGATATCGCTACTGAAACCTTTTAATGGTGCAGATGCTCC  
 TCAGTGTGAATCTATCTATATGTTTCCATCTTACGCAAGGATCGATGGATTTGACGAGAGGT  
 ATACACCCTGGCACACAAGTATCATCTTTACTTGTATCGAGAACAAGCGTAGACCGAGAA  
 CCTTTAAATGGTGTGAGTTACAACCTGATGGTATCCCTGTACTTTTTATACCCGAAAATGC  
 AGGTTCTTTTAGGCAATGCAGATCGATTGCTTCCGCTTGCTCCAATATATATTTTGATTCCA  
 ATACCAGGGCGACTCTGCGTAACGAAAATGTGCGAAAATTTGGACTTCTTTACGGCAGATTTT  
 AATGAAGATTTCACTGCGTTTCATGGTGAACAATGCTTGATCAAGCTGAATACCTAAATGA  
 TGCCATTAAGTACATCTTGTCTCTTTACGAAAGGACCCCTGATTACCCACATCCAAAACCGC  
 AGTCAGTTATTATCGTGGGACATTCATGGGCGGTATTGTATCCAGGGTCATGCTAACTTTG  
 AAGAACCACGTACCGGGAAGTATAAGCACCATATTGACCTTATCATCACCTCATGCTGCTTC  
 ACCAGTAACCTTTGATGGTGCATTTTTAAAGCTTTACAAAATACAAAAGAATATTGGAGAA  
 AGCAGTTATCCCAAAACGATTCTTTTTTCTCTAAGAACATTTCAATTGGTTTCCATTACAGGC  
 GGTATATTGGATACTACTTTACCTGCAGATTATGCATCTGTAGAAGATTTGGTTAGCTTAGA  
 AAAATGGGTTTACCAGCTTACAACTACTATTCCAGATGTTTGGACTCCAATTGATCATTTAG  
 CCATTGTTTGGTGCAAGCAATTAAGAGAGGTACTAGCGCGCTTTTATTGGAAAGTATAGAT  
 GCCTCCAAACCTGAAAAGTTAAGCCATTGAATCAGAGATTGCAAATCGCTAGAAAACCTATT  
 GCTTTCAGGGTTTGAAGACTACTCATGGATGAATAGTAAGTTAAATTTATCCTCAAGAAAAC  
 TACAAGAATTTAGTGACAACCTCTTTTTCTGATTACGCTACTTTGGAAATGAACGATGTCCTA  
 GATTTTGAATGTTTAACTGGAAAAGTGGCACAACAATTATACAAAATAAATATTCCGAG  
 TAACATCTCCTCCACTGAACACCTGCATTTACATTTAATACTAGTCTCGATATGCCATATGA  
 TCTATTTCTGTACAGAGTCCAGGGTGAATCTAAGCTGTATAACAGCTGTTGATAGTATTCTA  
 ACAGTGCCAGGTCTTCAAAGATACTCAGTTTCGAGCTGATTCTTCTTTTGGAGAAGCAA  
 AAATCCGTTTAAAGCCGTTAGTGTGGCAAGAATATACTACAGAAGTACGACTACTTGATGA  
 TAAGCAAACCCACTTACGGTGAATTTTTCAGAACAAGAAGGCATGGAGGACAATCAGGGGTTT  
 CTTTTGGCATTACTGCGCAACGCTCTCCAATGTACAAATAGTCAATACTACACCTTCTCAAAT  
 ATTGCTCTTTGGAGAACAACCTACACTTGGATGGCAAAGACATCGAGCAGTTATAAGTTTCA  
 GTAATTTGTGGGATTCTTTATTATCGTACAAATTAGAAACCAAGATTGAGGCAAGCAACGAA  
 GGTATTGCTTCCGAAGAGACATTTGTTTTCAGCCTTTTATAAGGCAATGGGTTTACGAACCTTT  
 CGAGTCTAAATGGCATCTAAATATTATAAACAAGTCTCGATATAAATATGCATAAATGTAG  
 CACCGTTTATCCATTAATGAAAGCGAACCAGATCGCTACAATTAAGTTTTTTTTTATCCA  
 CCCGGAATGTCTTAGAAGCTAAAATGACTATTAATTGGTCTTTAACTTTGAAAATGCTGTT  
 TATCAGGTACAGATTAGCACTAGCATCTTTTCCAGTCGCGTTTATAGCACTCGTACTGTCAT  
 ACCAGTTCTACTGGTACAACAAGACATCTGAGTTTCTTCTTTGATAGCACTTTGGGATAT  
 ATTTAAGAAAGCACGGAATATTAATGTTTTTTACGCTGTTCTTAGCTTCGCCTGTGGTTAA  
 TAATAAGTTGGTACAACGAATACTTTATTTATTGGATCCTGTCGGTTTAAATTATCCATTTT  
 TGCTATCCGAGAGAAACATGCATGCAAATTTTTATTATTGGGGATCAGAGATTGGTTTATG  
 TCAACTATTGGAATTTCTTTTGGGGTTATGACAGTTGGATTACTAGCACTAGTTTCTAAGAT  
 TTTTGGATCCTTGGAAATTTTAGTAATATTCCTTCAACGGAAGTTATCAAAGAAAAACCTG  
 AAGATAAAGAGGCTTTTGATACTATTGAACATAAAGCGTATGGTAAGGGAAGATTAATGGCA  
 TCTGTGCTTTTATTACTGTTGGTATTTTTTACATAACCATAACCAGATGGCGTTTGTATCTC  
 ATTAGTAATCCAAATTGCTACCTGCATTAGAGTAGCGCTGTTGAAACTATCAAACAACGAGC  
 AGAAATTGAACTACTAAATTATAATATGACGTTGCTTCTGCTTTTATTATTGTTAGTGCC  
 ATTAACATCCCTATCATTATTGTTTTCTGCATAATGTTGCCATCAAATGGGAAACTTCATT  
 TAGATCCCATCACAATATACTAGCAGTGGCACCAATTATTTTTTTGGTTGGAATAATCTA  
 TTTTCAAATGCCAAACAGCGTACCTTTAGACACGTGGGATGGTAAAGTTACCATCATTTTA



TTTGTGTACTTAACCGTTTTTCAGTTTCATTTATGGAATAAGAAATCTGTACTGGATACACCA  
 CTTGGTGAACATAATATGTGCCTGGTTGCTATTTTTTCGAAACAATACATTAG

>YDR293C 0.68 Cold

ATGTCATAAAAAATAGCAACGTTAACAACAATAGATCCCAAGAGCCAAATAACATGTTTGTGCA  
 AACACAGGAGGTGGTAAAAACGCCCCAAAGCAGATTTCATGTTGCACACAGACGTTCCCAA  
 GTGAGTTGACAAAATTTGATGATTGAACAATTCACCTTGCAGAAGCAGTTGGAGCAAGTCAA  
 GCACAGCAGCAACAGTTGATGGCTCAGCAACAGCAATTGGCACAACAGACAGGACAATACCT  
 GTCAGGAAATTTGGCTCTAACAATCATTTACGCCTCAACCGCCTCACCTCATTACAACCT  
 CAAACGGTAATTCACCTGGTATGAGTGCAGGTGGCAGCAGAAGTAGAACTCACTCCAGGAAC  
 AACTCCGGATATTATCATAATTCATATGATAACAATAACAATAGCAATAATCCTGGGCTAA  
 CTCACACAGAAAAGACGAGTTTACAATCCAGCATATATGGCCATTCCAGAAGACATTTCTTAG  
 GTCTAAATGAAGCGAAAAAGGCTGCTGCGGAAGAACAAGCTAAAAGAATATCTGGGGGTGAA  
 GCAGGCGTAACTGTGAAGATAGATTCTGTTCAAGCTGATAGTGGCTCAAATTTCTACTACAGA  
 ACAATCTGATTTTAAATTTCCACCACCACCAAATGCTCATCAGGGCCATCGTCGCGCAACTT  
 CAAACCTATCACCTCCCTCTTTCAAATTTCTCCAAACTCTCACGGGGATAATGACGATGAA  
 TTCATAGCAACCTCTTCAACGCACCGCGTTCAAAGACAAGAAACAATGAATATTCTCCAGG  
 CATTAATTTCAAACCTGGAGAAAACCAATCACAGCAACCTCAACAGCAGCTTTCTCCATTCCGCC  
 ACAGAGGATCTAATTTCAAGGGATTACAATTTCTTCAATACCTTAGAACCTCCTGCATATTT  
 CAGCAGGGACACAAACATCGTGCCTCTAATTCATCAGTTCATAGTTTTCAGTTCACAAGGTAA  
 TAATAACGGAGGTGGACGTAAGTCCCTATTTGCACCCTACCTTCCCCAAGCCAACATTCAG  
 AGCTAATCCAAGAAGGGAGACTAGTAGCTGGTATATTAAGAGTTAATAAAAAGAATAGATCG  
 GATGCCTGGGTCTCTACAGATGGCGCTCTTGATGCGGATATTTACATTTGCGGCTCCAAAGA  
 TCGTAATAGAGCACTTGAAGGTGATTTAGTCGCGGTAGAACTATTAGTTGTGGACGATGTTT  
 GGGAGTCCAAGAAAAGAAAAGGAAGAAAAGAGGAGAAAAGGATGCCTCTATGCAACACGAT  
 CTAATTCCTTTGAACAGTAGTGACGATTACCACAACGATGCATCTGTTACTGCTGCAACAAG  
 CAACAATTTTCTATCTTCTCCCTCCTCGTCTGATTGCTAAGCAAGGATGATTTATCCGTCA  
 GAAGAAAGAGGTCATCTACTATCAATAATGATAGTGATTCTTATCATCTCCTACCAAATCA  
 GGAGTAAGGAGAAGAAGTTTCAATGAAACAACGTCCAACCTCAAAGAAAAATGACGATGTTGA  
 AGTTGAAGGTCAGTCATTGTTATTAGTTGAAGAAGAAGAAATCAACGATAAATATAAGCCAC  
 TTTACGCAGGCCATGTCGTTGCTGTTTTGGACCGTATCCCTGGTCAGTTATTTAGCGGTACA  
 TTAGTTTTGTTGAGACCATCCCAACAAGCTAATAGCGACAATAACAAACCACCACAAAGCCC  
 AAAAATTTGCTTGGTTCAAGCCTACTGATAAGAAGGTGCCATTAATTGCAATTCCTACAGAAT  
 TAGCTCCAAAGGACTTTTGTGAAAACGCTGATAAATACTCCGAAAAGTTATTCGTTGCCCTCT  
 ATTAACGTTGGCCAATCACATCTTTGCATCCATTTGGTATTTTAGTTTCCGAACCTTGAGA  
 TATTCACGATCCTGATACTGAAATTTGATTCCATTTTTAAGGGATAACAATTTTCTTTGCAATG  
 AATATTTGGATCAAAAAAATCCGCAAAAAGAAAAACCAAGTTTTTCAGCCGCTACCATTAACG  
 GCTGAAAGTCTAGAATATAGGAGGAATTTTACGGACACTAATGAGTACAATATCTTTGCAAT  
 TTCCGAGCTTGGATGGGTGCTGAAATTTGCCTTACATGTCAGGAATAACGGAAATGGTACCC  
 TAGAGCTGGGTGTCATGTTGTTGATGTGACCAGCCATATTGAAGAAGGCTCCTCTGTTGAT  
 AGGCGTGCAGAGAAAGAGGTCCTCTGCGGTGTTTCATGCCACAAAACCTGTCAATTTATTACC  
 ACAATCGTTCAACGACGAACCTGTCGTTGGCCCCTGGCAAGGAATCAGCCACGCTGTGCGTTG  
 TTTACACTCTAGACTCATCTACTTTAAGGATTAATCTACTTGGGTAGGCGAATCTACAATT  
 TCCCCCTCAAACATCTTGTCTTTAGAACAATTAGACGAAAAATTATCTACTGGAAGTCCAC  
 TAGCTACCTCTACTGTACAGGAAATTGCTAGATCATTTTATGCTAGAAGAATAAATGATC  
 CAGAAGCTACATTACTTCCCACCCTGTCTTATTGGAAAGCTTGGATGACGAAAAAGTTAAG  
 GTTGACTTGAACATCCTGGATAGAATTTAGGCTTTGTTGTAATTAATGAGATTAAGAA  
 GGTCAACTCCACTGTTGCAGAGAAAATTTACACCAAACCTGGTGATCTAGCTCTTTTGAGAA  
 GGCAGATGCAACCCATTGCAACCAAGATGGCGTCATTTAGAAAGAAAATTCAAAATTTTGGT  
 TACAATTTTGATACCAATACGGCGGATGAATTAATCAAAGGGGTGCTAAAAATTAAGATGA  
 CGATGTTAGAGTCGGAATTGAAATTTTACTGTTTAAAACCATGCCAAGAGCTAGATACTTTA  
 TTGCTGGCAAAGTAGACCCGGACCAATATGGGCATTATGCCTTGAACCTACCTATCTACACA  
 CATTTACAGCGCCAATGAGAAGATACGCTGATCATGTGTTTCATAGGCAATTAAGGCCGT  
 TATCCACGATACTCCATACACCGAAGATATGGAAGCTTTGAAGATTACCTCCGAATATTGTA  
 ATTTTAAAAGGACTGTGCTTATCAAGCACAGGAACAAGCAATTCATCTATTGTTGTGTA  
 ACAATCAACGACATGGGAAATACTACAGGACAATTAACAATGGCTACTGTCTTACAAGT  
 TTACGAGTCTCTTTGATGTATTTATTCCAGAATTTGGTATTGAAAAGAGAGTTTCATGGAG

ATCAACTACCTTTGATCAAAGCTGAGTTTGGATGGTACCAATCGTGTCTTGAATTGCATTGG  
 CAGCCCGGCGTAGATAGTGCAACTTTTATACCAGCAGATGAAAAAATCCAAAATCCTATAG  
 AAATTCATTAAAGAACAAATTCAGATCCACAGCCGCTGAGATTGCGAATATTGAACTAGATA  
 AAGAAGCGGAATCTGAACCATTGATCAGCGATCCATTGAGTAAGGAACTCAGCGATTTGCAT  
 CTAACAGTACCAAATTTAAGGCTACCATCTGCAAGCGACAACAAGCAAAAATGCTTTAGAAAA  
 ATTCATTTCTACTACTGAAACCAGAATTGAAAATGATAACTATATACAAGAAATACATGAAT  
 TGCAAAAGATTCTTATTCTATTGAGAGCTGAGGTGGGGATGGCTTTGCCATGTTTAAACCGTC  
 CGTGCATTAAATCCATTCATGAAGAGGGTATAA

>YDR258C 0.73 Cold

ATGTTAAGACAAGCTACAAAAGCACCAATACAAAATATTTACAGAGAACGCAACTATTAAG  
 GCGAAGTACTCCACGAATATACACTATTGTACAGTGTAAAAGATCTATTTGCAGTTTTAATG  
 CAAGACCTCGAGTAGCCAATAAACTTCTATCAGATATAAAAACAAATGCATTAAATGAAGTC  
 GCTATTTCAACCTGCGCCCTCAAGAGCTCATATGGATTGCCCAATTTCAAAGAACGTACGT  
 CCAAATGAGGATGGATCCCAATCAGCAACCGGAAAAGCCAGCTTTAGAACAATTTGGTACAA  
 ACTTGACAAAATTAGCGCGGACGGTAAATTAGACCCTGTCATTGGCAGAGACGAAGAAATC  
 GCAAGAGCTATTCAAATTTTATCAAGAAGAACAAAAATAATCCATGTTTGATCGGTGAGC  
 TGGTGTGCGTAAAACCGCCCTTATTGATGGGTAGCTCAAAGAATTGTTGCTGGGGAGGTCC  
 CTGACTCGTTGAAAGATAAAGATCTAGTAGCTTTGGATTGGGATCTTTGATTGCTGGCGCC  
 AAATATAGAGGTGAATTCGAAGAACGTTTAAAAAAGGTTTGAAGAATAATGACAAGGCCAA  
 TGGTAAGGTTATTGTTTTTATTGATGAAGTTCATATGCTGCTTGGCTTAGGTAAAACCTGATG  
 GTAGTATGGATGCTTCTAACATCTTAAAGCCAAAACCTGGCCCGTGGGCTACGTTGTATCTCT  
 GCAACCACTCTTGATGAATTCAAAATCATTGAAAAGATCCGGCTTTATCGAGAAGGTTTCA  
 GCCTATCTTATTGAATGAGCCGAGCGTCTCCGATACGATTTCTATACTAAGAGGTTTAAAAG  
 AAAGGTACGAGGTTTCATCATGGTGTAAAGGATCACTGATACAGCTTTAGTGTCTGCTGCAGTT  
 CTTTCAAATCGTTATATAACAGACAGGTTTCTACCTGATAAAGCCATTGATCTAGTTGACGA  
 AGCTTGTGCTGTACTACGTTTACAACATGAATCCAAACCGGATGAAATACAGAAACTGGATC  
 GTGCTATTATGAAAATACAAAATAGAACTGGAATCTTTAAAGAAAGAGACCGACCCTGTTTCC  
 GTGAAAAGAAGAGAAGCGTTGAAAAGGACCTAGAAATGAAAATGATGAATTAACAGATT  
 AACAAAATATGGGACGCTGAAAGAGCTGAAATGAAATCTATCAAAAATGCTAAGGCCAAATT  
 TGGACAAGCAAGAATTGAGTTGAAAAGTGTGAGAGAGAGGGTGATTACACTAAAGCATCC  
 GAGTTGCGATATTCAGAATTCCTGACTTGGAGAAGAAGGTAGCTTTAAGCGAGAAGAGTAA  
 GGACGGAGATAAAGTAAATTTACTTTCATGATTGAGTTACTTCTGACGATATTTCTAAGGTTG  
 TTGCCAAAATGACTGGTATTCCCTACAGAAACGGTGTGAAAGGCGACAAGGACCGCCTACTG  
 TATATGAAAATCTTTTAAAGAAAGAGTCTGTTGGCCAAGACGAGGCCATTGCTGCTATTTT  
 TGATGCTGTACGCTTTCAAAGGGCTGGTTTGACCAGTAAAAGAGACCTATTGCCAGCTTTA  
 TGTCTTTAGGTCCTACTGGTACTGGTAAAACAGAATTGACCAAGGCTTTAGCTGAATTCCTA  
 TTTGATGACGAATCAAATGTGATTCGTTTTGACATGTCAGAATTTCAAGAGAAGCATACTGT  
 CTCTCGTTTTAATCGGTGCACCTCCAGGTTACGCTCTTAAGCGAATCTGGTGGCCAATTAACG  
 AGGCTGTCAGAAGAAGCCTTATGCTGTGCTTTTTATTGATGAATTTGAAAAGCGCACCCC  
 GATGTTTTCCAACTACTGTTGCAAGTGTGGATGAAGGTAAGCTGACCGATTCCCTAGGCCA  
 TCATGTTGATTTCCGTAACACGATCATTGTGATGACCTCAAACATTGGACAAGATATTTTAT  
 TAAACGACACAAAGTTGGGTGATGATGGTAAGATTGACACCGCAACCAAGAATAAAGTTATC  
 GAAGCAATGAAAAGATCCTATCCACCTGAGTTCATCAATCGTATTGATGATATTCTAGTTTT  
 CAATAGGCTATCCAAGAAAGTTTTGAGGTCAATTGTTGATATTAGAATTGCAGAAATCAAG  
 ATCGTTTGGCCGAAAAAGAATGAAAATTGATTTAACTGATGAAGCGAAGGATTGGCTAACT  
 GACAAAGGCTACGATCAATTATATGGTGAAGGCCATTGAATAGATTAATTCATAGACAGAT  
 TTTGAACTCCATGGCAACTTTCTTATTTAAAGGTCAAATTAGAAACGGCGAAACTGTTAGAG  
 TGGTGGTTAAAGATACTAAGCTTGTGCTGTACCAAATCATGAAGAAGGCCAAGTTGTTGAA  
 GAGGAAGCTGAAAAGTAA

>YGR025W 0.79 Cold

ATGACTGGCTATGAGCCCTTTAAGTTTTTCTCTATCCGCATGTCTTCAATTAATTCTCCATC  
 AGTGATTTTTAAAACAATAAAACTTTCAATCCGGGTAAAACCTGAAGAATATAGAGCGAAAA  
 AAGCGTATGTGCAGGACAAGGGATACTTACGCCAAAAAAGACCATGTCCATTTTATTATAGG  
 ATACCACTTGCACGGCGTCAAAGTACTCAATTGGCTGTGCTTCTTCAAAAAACTAACATA  
 CACAAGAACCAAATTTAAATTCAACTTGGTTACCCAAAGAGAGAATTCATTATAG

>YNL215W 0.81 Cold

ATGGACAGTGAAGCAAGTGACATTGAGGCAGAGTTATCCGACAGCGTCTCAGCTGGTGGGGA  
 AGAATACATTGACGATGATGATTATACGGAAGATATTGACGATCAGATAGTCACAGCCAAAT  
 CATCTAGAAGAACAGCACGTAGGAGTGTACCTAAGGGTGTAAAGAACCTCAAACGCATTAGA  
 GATAAAGAACTTCTGTGGAGGTTGATGAAGATTATGATGAGGAGGAAGATGTATTGAGCCC  
 TTCTAAGAAGCGCCATCTACACACCAGATCAATGGACAAAAGGCAAGTTGCCGCAACAGCTT  
 CTGAAAAATCTGATATTGGTGATAGTAAAGGTAATGATGGCGAAATAGAAGACGGTATATTG  
 GAAGAAGAAGAGAGCTTAGAGAAGGAACTGAATAGAGGTGGAGGAAAGGAGGTAGAGAAAAG  
 TGAAGAATCTTACTACGCCAAAACGATGTTGGACAGAAGGGGGAGGAAGAACAAGACGGGG  
 AATCTGGAGGCTATGAAGATAATGAACCCAGTATAAGTAAAGAGTCAGACGAATTGGTCTCT  
 GTGGTAAACGGTAACGGTAACGAAGAGGATGATGAAGTGGAGGCAACAAAAGAAAATACAAC  
 AGATTCTACTAGAAGTACTACGACTCGAAGCAAGATGCTGTTAGATTTGCTGGAAGATGGTG  
 GGTCTAAAAAGAAATTAACAGATGAAGAAATCCAGCTGCGAAGAGCCGAAAATGCACGTAAA  
 AGGAAGAACCTTAGCGAGAAGAGACTGGAAGAGGAGAAGCAGGACACAATCAATAAGCTTTT  
 GAAGAAAAGGGCCGGTAAGTCTAGGAGCCACTTGCCAAATGATGATGAAAAGAATGATGGCT  
 CTTCAAGTTTTCGTGAAACCACGCAGGCCCTTACAATAGCGAGGGTATGACAAGAATTCTGCGG  
 AGATATGAAGAAGACTTATTTTGTACATTTTAA

>YKL220C 0.68 Cold

ATGCATTGGACGTCATCTTGAGCGCTATTTTGCCTTTTCTGCCTGTCAGGAGCAAGAGCATC  
 ACCTGCAAAGACAGTTATTCGTAACAAGGTGCCCTTGCTTGTCACTAATGCCTGCACGAGGA  
 TTTTTCAAAGTTACTTGGGAGTATAACCAGCAAGTCTAAGCGTTCATCACCAGTATGTTCT  
 TACGAACCAGCGTTTCAATCAATGCTGTATTGTATCTATGAAACGTTGGATGAAAAAGTTA  
 TTCGAATAAAACCTTAGAAAAACATTTAGTACCATCAAAAAAACTGTGCAAGTTATAGTG  
 ATGCTCTTCAGAACATGACTAATTTCTGAGTTTTATGACGTTCTAAACAACGGAACGAGGCAT  
 ATGACGCCCTATGTCAAAGGCAGTGCAAACCTAACATATCCAGTTGAAATGGATACACAGTT  
 AAGAAAAGCCTACTATCATGCATTTGCATGGTTTCTATGCTAACCTTAGATGTCGGAAACATAT  
 ATGGTGGCATTATATGTGCTTATTTTTGTGCTATCATGGCTTTTGCAGGCGTTCTTCATTGC  
 ATGAATTACACTCCCTTTAAAACCTGTTCTATTGAAGCAAAGCTTGTGGGATATGTAAGGGG  
 ATACCTCACTCTACCTACCATTGGAAGCAAACATGCGTCAGATTTCTCTTATTTTAGAATAT  
 TCACAGGATATTTACCTACAAGATTAGAGGGTATCATTATTCTTGGATATCTCGTGCTTCAT  
 ACCGTTTTTTTTGGCATAACGGTTATGAATACGATCCTGAAAATATAATATTCAAGTCTCGTAG  
 AGTTCAAGTTGCTCGATATGTGGCAGACAGAAGTGGTGTACTCGCATTTCGCACACTTTCCAT  
 TAATAGTTCTTTTCGCGGGAAGAAACAACCTTTCTCGAGTATATTTCTGGGGTTAAATATACT  
 TCCTTCATTATGTTTCACAAATGGTTGGGAAGAATGATGTTTTTGGATGCTATGATTCATGG  
 CTCTGCATATACTAGTTATACGGTAGCGAATAAACTTGGGCAACAAGTAAAAACCGATTAT  
 ATTGCAATTCGGGGTGGCAGCACTTTGTTTAGCTGGCACAATGGTTTTCTTTTCTTTTGCA  
 GTATTCAGGAAGTATTTTTATGAAGCCTTTCTTTTTCTTCATATCGTCTTGGTGCAATGTT  
 CTTTTATGCATGTTGGGAGCATGTTGTTAGTTTAAAGTGGCATTGAGTGGATATACACTGCTA  
 TTGCGATTTGGATCGTTGACCGGATTATTAGAATTATCAAAGCTTCTTATTTTGGTTTCCC  
 AAAGCTTCCCTACAACCTAATCGGGGATGATCTCATTGCTTAAACAGTTAAAAACCGCAAG  
 GCCATGGAGGGCCAAACCTGGGCAATATGTTTTCGTTTTGTTTTTACATCCACTGTACTTCT  
 GGCAGTCACATCCATTTACTGTTTTGGATTTCAGTAAGCAAGAATGGTGAACCTGGTTATTATC  
 CTGAAAGAAAAAAGGGAGTAACAAGACTTGTCAAAAAGTATGTGTGTCGCAATGGAGGTAA  
 GACATCTATGAGACTAGCTATAGAAGGTCCATATGGTTCTTCATCTCCGGTCAATAATTACA  
 ATAATGTATTGTTACTCACTGGAGGTACCGTTTTGCCTGGACCTATTGCACATGCAATTAAA  
 CTTGGAAAGACGTCAGCGGCTGCTGGAAAACAATCTGTAAAATTAGTGATTGCAGTTAGAGG  
 ATTCGACGTACTCGAGGCTTATAAGCCGGAGTTGATGTGTTTAGAAAATCTGAATGTACAGC  
 TTCACATCTACAACACAATGGAAGTCCCATCATTAACCCCTAGTGATAGTTTAGATATTTCT  
 CAACAGGATGAGAAGGCTGATGAAAAGGCACGTTGTGGCAACTACTTTAGAAAAGTCTGC  
 CAATCCACTTGGTTTTGATGGTGTGTTTTCCATTGCGGGCGACCAATGTTAAGGAACCTC  
 TACATGAAGCGGCTGAATTGAGTGGCTCATTATCTGTGGTTGCTGTGGACCTCCTATTTTT  
 GTTGACAAAGTGAGGAATGAAACCGCAAAAATAGTTTTAGATAAGTCTGCAAAGCCATTGA  
 GTACTTTGAAGAGTATCAATGCTGGTGA

>YGL240W 0.79 Cold

ATGGACCCGATTGGAATAAACAAAGTCTTGGACCATTTAGCACCCCTCAGAGCTTATCAAACC  
 TGTTAAGAGTTGCCATAATAAACCTTCAGTGTGGTGGTGGATGACAGGATTGTGGATGCGG  
 CAACCAAAGATCTCTACGTGAATGGGTTCAGAAGAGATTTCAGTATCAGAATCTACACCG  
 GAGAACTTGCAACATATGTTCCACCAAGGTATTGAAATATTGGATTTCGGCAAGGATGATCAA  
 CGTGACACATTTAGCGCTTTGGAAGCCTTCTCTTTTAAAGTTGGGGAATCCTGTGGACTTTG  
 CTCTAGATGATAACTACGATACGTTTTGGCAGAGCGATGGAGGGCAACCACCAATTGGAC  
 ATTATGTTTAGTAAGAGAATGGACATCTGTGTCATGGCAATATTCTTTTCGATGATTGCGGA  
 CGAGTCCTATGCTCCAAGCTTAGTGAAAGTTTACGCGGGGCATAGTCCTTCTGATGCGAGGT  
 TTTATAAGATGCTTGAAGTGAGAAATGTGAATGGCTGGGTGGCACTAAGGTTTCTAGATAAT  
 AGGGAGGACGACCAGCTGCTGAAATGTCAATTCATCAGGCTTTTGTTCAGTCAACCATGA  
 AAACGGAAAAGATACACATCTGAGAGGCATAAGGCTATATGTTCCATCTAATGAGCCACATC  
 AAGATACCCATGAGTGGGCACAGACCCTCCAGAACTAACAATGTCTTCCAGGATGCTATA  
 TTACGTTAA

>YCL052C 0.79 Cold

ATGGTGACAAGACATAGAGTGACTGTACTCTACAATGCCCTGAGGATATCGGTAATCATAT  
 GCGCCAAAATGACACTCATTGACTGTTCTGTGGAGGTTCTGGTGTGGTTTTACAACAAAAGGT  
 GGCTATTAGAGAGGACTGGAAGCTTGGATAAATCCTTTACGAGAATCACTTGGAGGCCCAGA  
 GCGGACTTGGCTAGAAGTTTAAAGCGTTATAGAAAATGAACTGAGTGCTGGCTTTTTCAGTTTA  
 CTCAAATTTCTCGGATGTGCCGAAAGGTTTATTACTAACCAGTCTACAATTCATTTCCACA  
 GTGAGAAGTTTGACATAGAGCAGTACTTGCCTCCCGAAGTAGATTTGAATCTGTCATGGAAT  
 CCAGAAGATTTTACATATGATATATCAGTGGAGCCACACAAAATCCAAATGTTGAATATCG  
 TCTGTTGAAACAGGGTGAAGAATTTACAATGCAAGAGTGAAAGATGAGAACTCGAAGTAG  
 GTGTATTCTTTGTGGATGCAAGTGATGAAAAGTGATGTCGATATTGGTGGAAATACGTTGTAAT  
 TGGAGGATGGACGATGGTAAAAATGGAAAGATGTCAGAAAACATCCTTATTGTATAAACAGGG  
 CCATATCGCATACAATCACTCGACGACTACGACATCACTATATCTGAATGAACCTATCGGTT  
 TGCATCCAAAAATCATGATTGATCTCACAGATTTTCAAGAAGCCCTAAATGCATGTATCTA  
 ATGCACCTGCAATGCGGTTAGAATTTATTTATCGATAAATCCAATCCTCTCCCTTACTACT  
 TTTTGGAGAAGACGACTTAGAATTACCAGAATACTCTCTTCGAGATAAAGCATGGGGTTCTG  
 AAAGTATCTTTGAATTGAAAGCCGGCACAATGAATGAAGTGACATTGCATACTAGATATATT  
 GAGCCTTCTAATAATAAAGGGGATAAATTAGAAGTTTTCATTTGATCCAGAAGTTATATTAGC  
 CTGCGACACAGGTGACAATAAAGTTTTCCCGTAATCCATTTTATAAAAAAGGTCTAGGATATG  
 AATCTCTCTTTACAGACGATACTACATTCGCCATTTGAACTCGACAACCTTCTAGTACCA  
 ATTCCAAGGCCTGACACAAAGGATTATTCCAAGATCAAAAATGGTACGTTACTATGCTTACT  
 CATCTCCATCATATACATTTTCTCCAAGGATTTGGTAACAACAAGAAGAAAAGATCAGTAA  
 AACGGGAATAA

>YLR128W 0.72 Cold

ATGAGTAATAATAAAAATAAAAAGAAAGGATGCAAGCCGGAACAAGAGGCAATTGAATCATT  
 CACCTCATTAACCAAATGTGACCCCAAGGTATCCAGGAAGTACCTGCAGCGTAATCACTGGA  
 ACATCAATTACGCTCTCAATGATTATTATGACAAGGAAATAGGGACGTTTACTGACGAGGTT  
 TCAACTGTGGCTCATCCACCCGTATACCCGAAGGAGCTAACACAGGTATTTGAACACTATAT  
 CAATAACAACCTGTTTGGATATAGACTCACTGGTCAAGTTCATTGAGGAGCTAGGCTACAATC  
 TTGAAGATTTAGCGACATTATGCTTAGCCATTTACTGGGGTACAAGAACTAGAAGAACC  
 TTAACGAGAGGACTTCTGTCAACATGGTATTATGCAAGGCTGTTCCACCATTTTCAGACAT  
 GCAAGAGTGCATCAAGACGTTAGATGTTAAATTACATGAAGACTTACAATATTTTCACACAGA  
 TTTATAACTATGCTTTCAATTTGATTCTGGACCCAAATCGAAAGGATATAGATACAGACGAA  
 GGCATCCAGTATTGGAAGCTATTTTTCCAACCAGAGTACCCAGTGCGTATGGAACCAGATTT  
 GCTTGAGGCATGGTTCGGTTTCTTTCGCGATGAGGGGAAAACCACTATAAGTAAAGACACCT  
 GCGTATGCTGCTCCTCTTTTTCAAACGATACCCCACTATTCAGAAAATAATAAGCGATTAC  
 GACGAAACTGCAGCCTGGCCATTTATTATCGATGAGTTCTATGAGTGCTTACAGGATCAGCA  
 ATAA

>YJL214W 0.76 Cold

ATGACTGATCGTAAAACCAACTTGCCAGAAGAACCGATTTTCGAAGAGGCAGAAGATGATGG  
 CTGCCCTTCGATAGAAAATTTTCACATCTGTGTCAGTACCTACAGTGGAGGAAAACAAGGACT  
 TTTCCGAGTATAATGGGGAAGAGGCAGAGGAAGTTGTTGTTCCAGAAAAGCCTGCTTCAGCC

TATGCTACTGTTTCTATCATGTGTTTATGTATGGCTTTCGGTGGATTTATGTCCGGTTGGGA  
CACAGGTACGATTTCTGGTTTCGTCAATCAGACTGATTTTTTAAGAAGATTTGGTAATTATA  
GCCATTTCCAAGAACACTTACTACTTATCTAATGTGAGAACTGGGTTGATTGTGTCCATCTTC  
AATGTGGGAAGCGCCATTGGCTGTCTTTTCTTGTCTAAATTTGGGTGATATTTACGGCCGCTG  
CATGGGTTTGATTATAGTTATTGTCGTTTATATGGTTGGTATTGTCATTCAAATTTGCCTCTA  
TAGATAAGTGGTATCAGTATTTTATTGGAAGAATTATCGCTGGTATAGGTGCTGGTTCCATT  
AGTGTCTTGGCCCGATGCTTATTTTCGGAACCTGCGCCAAAGCATATCAGAGGTACGTTGCT  
AGCTTGTGGCAATTGATGGTGACTTTCGCAATTTTCTTGGGTTATTGTACCAATTATGGTA  
CCAAGACTTACTCGAATTCTGTCCAGTGGCGTGTTCGGCTTGGTCTATGTTTTGCATGGGCT  
ATTATTATGATTGGTGGTATGACGTTTGTTCGGAATCTCCTCGGTTTTTGGTGCAAGTCGG  
TAAGATTGAGCAAGCTAAAGCTTCTTTTGCCAAGTCGAACAAGCTTAGTGTTGACGATCCTG  
CTGTGGTTGCAGAGATTGATCTTCTTGTGCTGGTGTGGAGGCAGAAGAAGCAATGGGA  
GCTTCATGGAAGGAATTATTTTCGAGAAAGACTAAAGTTTTTCAACGTTTAAACGATGACAGT  
CATGATTAACCTCTCTGCAGCAACTAACCGGTGACAACCTATTTCTTCTACTACGGTACTACTA  
TCTTCAAATCTGTCCGGTATGAATGACTCTTTTGGAGACTTCAATTGTCTTGGGTATTGTGAAT  
TTTTGCTTCTTGTCTTCTTTTCACTTTATTCTGTTGATAAGTTGGGCCGTCGTAGATGTCTTTT  
ACTTGGAGCAGCCACCATGACGGCGTGCATGGTTATTTACGCCTCCGTTGGCGTCACAAGAC  
TATATCCGAACGGTAAAAGTGAACCATCATCTAAAGGTGCTGGTAATTGTACGATTGTTTTT  
ACGTGTTTTTACATTTTCTGCTTTTCTTGCACCTGGGGACCTGTATGTTATGTGATTATTTT  
TGAAACATTTCCATTAAGGGTGGAGATCCAAGTGTATGTCCGTTGCAACAGCGGCCAACTTAT  
TGTGGGGGTTCTAATCGGGTTTTTCACTCCTTTTATTACTTCGGCAATTAATTTCTACTAC  
GGTTACGTTTTTATGGGTTGCTTAGCGTTTTTCATATTTTTTACGTCTTTTTTCTTTGTTCCAGA  
AACAAAAGGTCTAACTTTAGAAGAAGTTGATGAGATGTGGATGGACGGTGTATTACCTTGGGA  
AATCTGAATCCTGGGTACCAGCTTCTAGAAGGGATGGTGATTATGATAACGAAAAATTACAG  
CATGACGAGAAACCCTTCTACAAAAGAATGTTTTAG

>YLR012C 0.78 Cold

ATGAAGACTGTCTATTACAAAAGAAATCACCTACCAGCAGTATCTTCAACTGCAACCTGAACA  
ACAGGAAAAATACCTGGCTTTATGTCAAAAAGATTTTTGAACAAGAGACTGAAAGAATTGCAT  
TTGATCGTCAAGGAGGTGTGCTTGGTATTGCTAGGAAATTTGCACAAGAAGAAGTTGCTTGG  
TTCGATCGCGTTACAACATGGTCATATATGAATGCTTATATTCAGGACTACAGAAGAAGAAG  
AAACCTTTTAAAGATTGATATGTTAAAGATGTCTAATGCTGAAGAATACTGA

>YOR377W 0.8Cold

ATGAATGAAATCGATGAGAAAAATCAGGCCCCCGTGCACAAGAATGCCTGAAAGAGATGAT  
TCAGAATGGGCATGCTCGGCGTATGGGATCTGTTGAAGATCTGTATGTTGCTCTCAACAGAC  
AAAACTTATATCGAAACTTCTGCACATATGGAGAATTGAGTGATTACTGTACTAGGGATCAG  
CTCACATTAGCTTTGAGGGAAATCTGCCTGAAAAATCCAACCTTTTTACATATTGTTCTACC  
AACAAAGATGGCCAAATCATGAAAATTATTATCGCAGTTCCGAATACTATTACGGCCACATC  
CAGTGCATGATTATTTTCACTATTACAAGAATTGAAACTGAGTGGTGTGGTTCTCAATGAA  
CAACCTGAGTACAGTGCAGTAATGAAGCAAATATTAGAAGAATTCAAAAATAGTAAGGGTTC  
CTATACTGCAAAAATTTTTAACTTACTACCCTTTGACTATTCCTTACTTTGGACCAACAG  
GACCGAGTTGGCGGCTAATTTGTCTTCCAGAAGAGCACACAGAAAAGTGGAAAAAATTTATC  
TTTGTATCTAATCATTGCATGTCTGATGGTCTTCCGATCCACTTTTTTTCATGATTAAAG  
AGACGAATTAATAATATTAACCTCCACCAAAAAAATTAGATTACATTTTCAAGTACGAGG  
AGGATTACCAATTATTGAGGAACTTCCAGAACCGATCGAAAAGGTGATAGACTTTAGACCA  
CCGTAATTTGTTTATTCGGAAGTCACTTCTTTCGGGTTTCATCTACAATCATTGAGATTTTC  
TTCAAAGGTGTCTGTATGAGAATGGATGATGTGGAAAAAACCAGATGATGTTGTCACCGAGA  
TCATCAATATTTACCAACAGAAATTTCAAGCGATTAAGCAAATATTAATCAAATATCCAA  
GGTAAGTGTACTATCACTCCGTTTTTACATGTTTGTGGTTTGTATCTCTTCATAAATGGGG  
TAAATTTTTCAAACCATTGAACTTCGAATGGCTTACGGATATTTTTATCCCCGCAGATTGCC  
GCTCACAACCTACCAGATGATGATGAAATGAGACAGATGTACAGATATGGCGCTAACGTTGGA  
TTTATTGACTTCACCCCTGGATAAGCGAATTTGACATGAATGATAACAAAGAAAAATTTTTG  
GCCACTTATTGAGCACTACCATGAAGTAATTTCCGGAAGCTTTAAGAAATAAAAAGCATCTCC  
ATGGCTTAGGGTTCAATATACAAGGCTTCGTTCAAAAATATGTGAACATTGACAAGGTAATG  
TGCGATCGTGCCATCGGGAAAAAGACGCGGAGGTACATTGTTAAGCAATGTAGGTCTGTTAA  
TCAGTTAGAGGAGCCCGATGCCAAATATTCTATATGCGATTGGCATTGGCCAATTTCAAG

GATCCTGGCACCAAGCATTTCCTTGGGTGTTTGTTCGACTAATGTAAAGGGGATGAATATT  
 GTTGTTCGTTCAACAAAGAATGTTGTTGGTAGTCAAGAATCTCTCGAAGAGCTTTGCTCCAT  
 TTACAAAGCTCTCCTTTTAGGCCCTTAG

>YNL027W 0.81 Cold

ATGTCATTCAGCAACGGAAATATGGCTTCTACATGACTAGTAGTAATGGAGAGGAGCAAAG  
 TATAACAACAAAAACGATATAGACGATAACAGCGCTTACAGACGTAATAATTTTCAGGAATA  
 GTAGCAATTCAGGATCACATACGTTCCAATTATCGGACTTGGACTTAGATGTGGATATGAGG  
 ATGGATTCCGCCAATTCATCGGAGAAAATATCAAAGAACCCTTCTCTGGCATCCCGGACTC  
 ATTTGATTCTAACGTGAACAGCTTGCTGTCTCCGTCAAGCGGTTCTTATTCTGCAGATTGA  
 ATTACCAAAGTCTATACAAACCAGATCTTCCACAGCAACAGTTACAACAGCAACAGTTACAA  
 CAGCAACAGCAACAGCAACAGCAACAACAACAGCAACAGCAGAAGCAAAACACCAACTTTAAA  
 AGTCGAACAATCTGATACATTTTCAGTGGGACGATATCTTAACACCTGCTGATAATCAACATC  
 GGCCATCCCTCACAAACCAGTTTTTATCTCCAAGATCTAATTACGATGGTACCACTAGGAGC  
 TCGGGCATTGACTCCAATTATAGCGATACAGAATCAAATATCATAACGCTTATTTGTATCC  
 ACAGGACTTAGTTTTCTTCCACTGCGATGTCTCACTTAACCGCAATAACGATGATTTTGACG  
 ATCTTTTGAGCGTCGCATCTATGAACTCAAATTTATTTACTGCCCGTAAATTCACATGGTTAT  
 AAACATATTTCAAACCTTGATGAGTTGGATGACTTGCTATCTTTAACATATTCAGACAATAA  
 CCTTTTATCAGCATCAAACAACAGTGATTTCAACAACAGTAATAACGGAATTATTAATACCG  
 CTGACACTCAAAACAGTACCATTGCCATTAATAAAAAGTAAAGTCGGTACTAACCAAAAGATG  
 TTATTGACTATTCCAACCTTCTTCCACACCTTCTCCTTCCACTCATGCTGCCCGGTAACACC  
 CATCATTTCTATACAGGAATTCATGAGGGACACTTCCCAGTTAAAAACGAAGATGACGGAA  
 CGTTACAACATAAAAGTTTCGGGATAACGAAAAGTTATAGCGCTACTAACAATAACAATCTACTT  
 CGTCCAGATGATAATGATTACAACAACGAAGCTCTCAGTGATATTGACCGCTCCTTCGAAGA  
 TATCATTAACGGTCGAAAATTTGAACTTAAAAAATCAAGAAGAAGATCTTCTCAAACCTCCA  
 ATAATAGTTTTACTAGCAGGAGATCCTCGAGATCAAGAAGCATATCTCCCGATGAAAAAGCT  
 AAATCTATAAGTGCAAATAGGGAAAAGTTATTGGAGATGGCAGATCTTTTACCATCCAGTGA  
 AAATGACAATAATCGGGAGCGCTATGACAATGATAGCAAAACTAGCTATAACACCATTAACA  
 GTAGCAATTTTAAATGAGGATAATAATAACAATTTGTTAACAAGTAAACCAAAAATGAA  
 TCGGGCATTGTCAATATTA AAAATGAACTAGATGACACTAGCAAAGATCTTGGCATACTTCT  
 AGACATAGATAGCTTGGGCCAATTTGAGCAGAAAGTTGGTTTCAAAAATGATGATAATCACG  
 AAAATAACGATAATGGCACATTTTCTGTTAAGAAAATGACAATCTAGAAAAACTAGACAGT  
 GTAACAAATAATAGGAAAATCCTGCGAATTTTGTCTGTGATGTATGTGGTAAGAAGTTTAC  
 AAGACCTTATAACTTAAAGTCACACTTAAGAACGCATACAAATGAAAGGCCATTTATTTGTT  
 CTATTTGTGGTAAGGCGTTTGCACGTCAACATGATAGAAAGAGACACGAAGATTTGCATACA  
 GGTAAGAAAAGGTATGTATGCGGTGGTAAGCTGAAGGACGGTAAACCTGGGGTTGTGGCAA  
 AAAGTTTGCAAGAAGTGATGCTTTGGTAGGCATTTTAAAACGAAAGTGGTAGAAGATGCA  
 TCACTCCCTTGTACGAAGAAGCCAGACAGGAGAAATCGGGACAAGAGAGTTAA

>YDR294C 0.8 Cold

ATGAGTGGAGTATCAAATAAAACAGTATCAATTAATGGTTGGTATGGCATGCCAATTCATTT  
 ACTAAGGGAAGAAGGCGACTTTGCCAGTTTATGATTCTAACCATCAACGAATTA AAAATAG  
 CCATACATGGTTACCTCAGAAATACCCCATGGTACAACATGTTGAAGGATTATTTGTTGTG  
 ATCTTTTGTTACAAGCTAATAAGTAATTTTTTTTATCTGTTGAAAGTTTATGGGCCGGTGAG  
 GTTAGCAGTGAGAACATACGAGCATAGTTCCAGAAGATTGTTTCGTTGGTTATTGGACTCAC  
 CATTTTTGAGGGGTACCGTAGAAAAGGAAGTCACAAAGGTCAAACAATCGATCGAAGACGAA  
 CTAATTAGATCGGACTCTCAGTTAATGAATTTCCCACAGTTGCCATCCAATGGGATACCTCA  
 GGATGATGTTATTGAAGAGCTAAATAAATTGAACGACTTGATACCACATACCCAATGGAAGG  
 AAGGAAAGGTCTCTGGTGCCGTTTACCACGGTGGTGTGATGATTTGATCCACTTACAAACAATC  
 GCATACGAAAAATATTGCGTTGCCAATCAATTACATCCCGATGTCTTCTGCCGTACGTAA  
 AATGGAATCCGAAGTGGTTTTCTATGGTTTTAAGAATGTTAATGCCCTTCTGATACAGGTT  
 GTGGTACCACAACCTTCAGGTGGTACAGAATCCTTGCTTTTAGCATGTCTGAGCGCTAAAATG  
 TATGCCCTTCATCATCGTGGAAATCACCGAACAGAAATAATTGCTCCCGTAACTGCACATGC  
 TGGGTTTGACAAAGCTGCTTATTACTTTGGCATGAAGCTACGCCACGTGGAGCTAGATCCAA  
 CGACATATCAAGTGGACCTGGGAAAAGTGAAAAAATTCATCAATAAGAACACAATTTTACTG  
 GTCGGTTCCGCTCAAACCTTCTCATGGTATTGCCGATGATATTGAAGGATTGGGTA AAAAT  
 AGCACAAAATATAAACTTCTTTACACGTCGACAGTTGTC TAGGTTCTTTATTGTTTCAT

TTATGGAAAAGGCTGGTTACAAAAATCTGCCATTACTTGACTTTAGAGTCCCGGGAGTCACC  
TCAATATCATGTGACACTCATAAATATGGATTTGCACCAAAAGGCTCGTCAGTTATAATGTA  
TAGAAACAGCGACTTACGAATGCATCAGTATTACGTAAATCCTGCTTGGACTGGCGGGTTAT  
ATGGCTCTCCTACATTAGCAGGGTCCAGGCCTGGTGTCTATTGTCGTAGGTTGTTGGGCCACT  
ATGGTCAACATGGGTGAAAATGGGTACATTGAGTCGTGCCAAGAAATAGTCGGTGCAGCAAT  
GAAGTTTAAAAAATACATCCAGGAAAACATCCAGACCTGAATATAATGGGCAACCCTAGAT  
ATTCAGTCATTTTCAATTTTCTTCAAAGACCTTGAACATACACGAACTATCTGACAGGTTGTCC  
AAGAAAGGCTGGCATTTCATGCCCCTACAAAAGCCGGTTGCACTACACATGGCCTTCACGAG  
ATTGAGCGCTCATGTTGTGGATGAGATCTGCGACATTTTACGTACTACCGTGCAAGAGTTGA  
AGAGCGAATCAAATTTCTAAACCATCCCAGACGGAAGTACGCGCTCTATATGGTGTGCGCCGG  
AGCGTTAAACTGCTGGCGTTGCAGACAAATTGATTGTGGGATTCCTAGACGCATTATACAA  
GTTGGGTCCAGGAGAGGATAACCGCCACCAAGTAG

>YEL069C 0.69 Cold

ATGCTAGTGCGCAATCCTCTATTGATAGCGATGGAGATGTTTCGAGATGCTGATATTCATGT  
CGCACCACCCGTGGAAAAAGAGTGGTCAGATGGATTTGATGACAACGAAGTCATAAACGGGG  
ATAACGTTGAGCCACCAAAAAGAGGGCTCATAGGTTATCTTGTCAATTTACTTACTGTGTTAT  
CCAATATCCTTTGGGGGTTTCTGCCTGGTTGGGATAGTGGTATCACAGCAGGTTTCATTAA  
CATGGACAACTTTAAATGAACTTCGGTTCTTACAAGCATAGCACTGGTGAATATTATTTGA  
GCAACGTGCGTATGGGTCTTCTTGTGGCTATGTTTCAAGTATTGGATGTGCCATAGGTGGCCTT  
ATTTTTGCCCGTCTTGTGATACTTTAGGTAGAAGGCTGGCAATTGTGATCGTGGTGTGGT  
ATATATGGTTGGTGCAATTATTCAGATCAGTTCAAATCACAAATGGTACCAGTACTTTGTCTG  
GTAAGATCATCTACGGTCTTGGTGCTGGTGGCTGTTCCGGTGTGTGTCCAATGCTTTTGTCT  
GAAATAGCCCCCACAGATTTGAGAGGTGGACTGGTCTCATTGTACCAACTGAACATGACGTT  
CGGTATTTTCTTGGGTTATTGTAGCGTTTATGGTACGAGAAAATACGATAACACTGCACAAT  
GGAGAGTCCCCCTTGGGCTTTGCTTTTTTATGGGCTTTGATTATCATCATTGGTATGTTATTG  
GTTCCAGAGTCCCCAAGATATCTGATTGAATGTGAGAGACACGAAGAGGCCCGTCTCCAT  
TGCCAAAATCAACAAGGTTTACCAGAGGATCCATGGGTACTCAAACAGGCTGATGAAATCA  
ACGCCGGTGTCTTGGCCAAAGGAACTAGGAGAAGCTTCATGGAAAGAACTTTTCTCTGTA  
AAAACATAAGTCCCTTCAACGTTTGTATCACAGGTATTCTTGTGCAAACCTTTTTGCAACTTAC  
TGGTGAAAACACTTCTTCTTCTACGGAACACTACATTTTTTAAATCAGTCGGTCTTACTGATG  
GGTTTGAGACGTCGATCGTCCTAGGTACAGTGAACCTTCTTCTCCACTATTATTGCTGTTATG  
GTCGTAGACAAAATTTGGCCGTCGTAATGTCTGTTATTTGGTGCAGCTGGGATGATGGCTTG  
TATGGTCATATTTGCAAGTATCGGGGTGAAATGTCTTTACCCTCATGGCCAGGACGGTCTT  
CTTCGAAAGGTGCAGGTAATGCCATGATTGTGTTCACTTGTCTTCTATATATTCTGCTTTGCA  
ACGACATGGGCTCCTGTTGCTTATATTGTGGTTGCCGAGTCGTTCCCTTCGAAGGTCAAGTC  
TAGAGCCATGTCGATTTCAACTGCATGCAACTGGTTATGGCAATTTTTGATCGGTTTTTTCA  
CACCATTCACTTACTGGGTCTATCCACTTCTATTATGGTTATGTGTTTCGTAGGTTGTTGGTT  
GCTATGTTTTTGTACGTTTTCTTTTTTACCAGAAACGATTGGTCTATCTTTGGAGGAAAT  
CCAATTACTATACGAAGAAGGTATAAAACCATGGAAATCTGCATCTTGGGTCCACCTCTA  
GGAGAGGTATTTCTTCCGAAGAAAGTAAGACCCGAGAAGAAGGATTGGAAGAAATTTTTGAAG  
TTCTCAAAGAATTCTGATTGA

>YBR171W 0.82 Cold

ATGTCGAATTTAATGAAACAAAATTTCTCCAACAACGGGACGTTTTTTTTGAAACGGAAGAGCC  
AATTGTGGAGACGAAATCAATCTCCGTTTATACCCCACTCATATATGTCTTTATTCTGGTGG  
TGTCCCTTGTGATGTTTGTCTCAAGCTACAGAAAGAAGCAGGCCAAAAAATTAGTGAGCAA  
CCATCCATATTTGACGAAAACGATGCCCATGATCTGTATTTCCAAATAAAGGAAATGAGTGA  
AAATGAAAAAATTCACGAGAAGGTGTTGAAGGCCGCTTTATTGAACAGAGGAGCAGAATCTG  
TTAGACGATCATTAAGTTAAAAGAGTTGGCTCCTCAGATAAACCTTCTATATAAAAAATGGC  
TCTATTGGGGAGGATTACTGGAAGAGATTTGAACTGAAGTTAAATTAATTGAATTGGAATT  
TAAAGATACTTTACAAGAAGCTGAAAGATTGCAACCGGGCTGGGTTCAATTGTTTCGTTATGG  
TTTGTAAAGAAATTTGCTTTAATCAAGCTCTCTCTAGACGTTATCAATCAATCTTGAACCGG  
AAAGAAGTGTGATTAAGAGTGGGAGCTGAAAATAAATAATGATGGAAGATTAGTCAATTA  
G

>YBR170C 0.82 Cold

ATGCTTATCAGATTTAGATCAAAAAACGGTACACACAGGGTTTCTTGTCAAGAAAACGACCT  
 TTTTCGGAACGGTCATTGAAAAGTTGGTGGGTAATCTGGACCCCAATGCCGATGTGCACACAT  
 TTAATGTTTGTGAGAAGCCCGGTCAAGGTATTCATGCTGTTTCTGAACTAGCTGATCGAACA  
 GTGATGGATCTAGGACTAAAGCACGGTGACATGCTGATCCTTAACTATTCGGACAAGCCCGC  
 TAATGAGAAAAGATGGTGTCAATGTTGAAATCGGATCCGTAGGTATTGACAGCAAGGGAATTC  
 GTC AACACAGGTACGGTCCACTAAGGATCAAAGA ACTCGCTGTAGATGAGGAACTAGAGAAA  
 GAGGACGGATTAATTCCTCGTCAAAAATCAA AACTATGCAAGCACGGTGATAGAGGTATGTG  
 TGAATACTGCTCGCCTTTACCTCCTTGGGACAAAGAATATCATGAGAAGAATAAGATCAAAC  
 ATATATCGTTTCATTCATATCTTAAAAAGCTAAATGAAAATGCTAATAAGAAGGAGAACGGC  
 AGCTCTTATATTTCCCTCCTTTCAGAACCTGATTTTGAATCAATAAGCGTTGCCATAATGG  
 CCATGAACCATGGCCTCGGGGGATATGTTCTAAATGTCAACCATCGGCAATTACATTACAAC  
 AGCAAGAATTTAGAATGGTTGACCACGTTGAATTTTCAGAAAGAGTGAAAATAATTAATGAATTT  
 ATTCAGGCGTGGAGGTACACGGGTATGCAAAGATTTGGCTATATGTACGGATCTTATTTCTAA  
 GTATGATAACACACCTTTAGGTATAAAGGCCGTCGTTGAGGCGATATACGAGCCCCCTCAGC  
 ATGATGAGCAAGACGGTTTAAACCATGGACGTAGAACAGGTCAGAATGAAATGCTACAGATT  
 GATAGACAGGCTCAAGAAATGGGGCTTTTCGCGAATTGGCCTAATATTTACAGATTTATCTGA  
 CGCGGGAGCTGGGGATGGGTCTGTTTTTTTGCAAAGACATAAGGATTCGTTTTTTCTTTTCAT  
 CATTAGAAGTTATTTATGGCTGCTAGGCATCAAACAAGGCATCCTAATGTAAGCAAGTATAGC  
 GAACAAGGTTTTTTTTCTTCCAAGTTTGTAAC TTGCGTTATATCAGGTAATTTGGAAGGTGA  
 AATTGATATTTTCGAGCTACCAAGTATCCACAGAAGCTGAAGCATTGGTTACTGCAGATATGA  
 TAAGTGGGTCCACATTTCTTCAATGGCATAATTAATGACACTACAGATGAAAGATATGTA  
 CCTGAGATATTTTACATGAAGTCGAATGAATATGGTATAACAGTGAAGGAAAATGCGAAGCC  
 TGCATTTCCGGTAGACTATCTTTTAGTGACGCTGACTCATGGGTTCCCGAATACCGATACGG  
 AAACCAACTCGAAATTCGTTAGTTCCACCGGATTTCCATGGAGCAATCGACAAGCTATGGGG  
 CAATCTCAAGATTATCAAGAATTA AAAAAAGTATTTATTTCAATGTGGCTTCAAGTGAGATTT  
 CAATCTTTTGCATGAAAAAATCTCGAACTTTCATTTACTATTATACATAAATTTCTCTGCAGA  
 TACTCTCTCCAGACGAATGGAAGTTACTAATAGAATCTGCTGTGAAAAATGAATGGGAAGAA  
 TCTCTACTAAACTTGTCTCATCGGCTGGTTGGCAAACGTTAGTCATGATCCTTCAGGAAAG  
 CGGCTAG

>YDR021W 0.82 Cold

ATGTCGTTTGACAGAGAAGAAGACCAAAAATGAAAGTTTAAAACATCGAAAAAATTAAGGT  
 GTCTTCTACTTTTGAAAGCATGAATCTAAAAGATGACTTACTTTCGAGGAATATACTCATACG  
 GTTTTGAAGCACCATCCTCTATCCAATCAAGGGCTATTACACAGATTATTTTCGGGCAAGGAC  
 GTTATAGCACAAAGCACAATCAGGTACAGGTAAGACAGCAACTTTTACAATCGGCCTTTTACA  
 AGCTATTGATTTAAGGAAGAAAGATTTACAAGCTCTAATACTATCTCCAACACGTGAATTAG  
 CAAGCCAAATTTGGCAAGTAGTAAAAAATCTAGGGGATTATATGAATGTCAATGCATTTGCC  
 ATTACAGGTGGTAAAAC TTTGAAAGACGACCTGAAGAAAATGCAAAGCATGGTTGCCAGGC  
 CGTTAGCGGAACACCAGGAAGAGTATTAGACATGATTAAGAAACAAATGTTGCAAACAAGAA  
 ATGTTCAAATGTTAGTTTTAGATGAGGCTGATGAATTATTGAGTGAGACACTAGGTTTCAAG  
 CAACAAATATAACGATATTTTTGCAA AATTGCC TAAAAATGCCAAGTTGTTGTTGTCAGCGC  
 AACAAATGAATAAGGACATTTTAGAAGTAACCAGAAAATTTATGAATGATCCAGTTAAAATCC  
 TAGTGAAGAGGGATGAAATATCACTTGAAGGTATCAAACAATATGTCGTTAATGTTGACAAA  
 GAAGAGTGGAATTCGATACTCTGTGTGATATATACGATTC TTTGACCATTACACAATGTGT  
 GATATTCTGTAACACCAAGAAAAAAGTAGATTGGTTATCTCAGCGGCTAATCCAATCAAAC T  
 TTGCTGTAGTCTCCATGCATGGTGATATGAAACAAGAAGAAAGAGATAAAGTAATGAATGAT  
 TTTAGAACAGGTCATTCTCGTG TACTGATATCGACGGATGTTTGGGCGCGCGGTATTGATGT  
 CCAACAAGTTTCTTTAGTCATTA ACTATGACCTACCAGAAAATAATAGAAAATTACATCCATC  
 GTATCGGTAGAAGTGGTCGATTTGGTAGAAAAGGGTGTGGCTATAAACTTCATTACCAAAGCT  
 GATTTAGCAAAACTTAGAGAAAATTGAAAAATCTATTCTATCAAATAAATCCGATGCCAGC  
 AAATTTTGCAGAATTATCATAA

>YNL332W 0.78 Cold

ATGTCTACAGACAAGATCACATTTTTGTTGAACTGGCAACCAACCCCATACCATATTTCCAAT  
 TTTCTTGGCTCAAACCAAAGGTTACTTCAAGGAGCAAGGCTAGACATGGCCATCCTAGAAC  
 CAACCAATCCTTCCGATGTCAC T GAGTTAATTTGGATCTGGTAAGGTCGACATGGGTTTGAAA  
 GCCATGATTCACACCTTGGCTGCCAAGGCCGTTGGTTTCCAGTGACCTCTGTTGCCTCTTT



GTTGGACGAACCATTTACCGGTGTCTTGTACTTAAAGGGCAGTGGTATCACTGAAGACTTCC  
 AGTCCCTAAAGGGTAAGAAGATCGGTTACGTTGGTGAATTCGGTAAGATCCAAATCGATGAA  
 TTGACCAAGCACTACGGTATGAAGCCAGAAGACTACACCGCAGTCAGATGTGGTATGAATGT  
 CGCAAGTACATCATCGAAGGTAAGATTGATGCTGGTATTGGTATCGAATGTATGCAACAAG  
 TCGAATTGGAAGAGTACTTGGCTAAGCAAGGCAGACCAGCTTCTGATGCTAAGATGTTGAGA  
 ATTGACAAGTTGGCTTGCTTGGGTTGCTGTGCTTCTGTACCGTTCTTTACATCTGCAACGA  
 TGAATTTTTGAAGAAGAACCCTGAAAAGGTCAGAAAGTTCTTGAAAGCCATCAAGAAGGCAA  
 CCGACTACGTTCTAGCCGACCCTGTGAAGGCTTGGAAAGAATACATCGACTTCAAGCCTCGA  
 TTGAACAACGATCTATCTTACAAGCAATACCAAAGATGTTACGCTTACTTCTTTCATCTTT  
 GTACAATGTTACCCTGACTGGAAGAAGGTTACCGGTTACGGTAAGAGATTAGCCATCTTGC  
 CACCAGACTATGTCCTCGAACTACACTAATGAATACTTGTCTGGCCAGAACCAGAAGAGGTT  
 TCTGATCCTTTGGAAGCTCAAAGATTGATGGCTATTCATCAAGAAAAATGCAGACAGGAAG  
 TACTTTCAAGAGATTGGCTCTTCCAGCTTAA

>YNR011C 0.79 Cold

ATGTC AAGTATTACATCTGAAACCGGTAAGCGAAGAGTGAAACGAACGTATGAAGTTACAAG  
 ACAGAATGACAAATGCAGTAAGAATAGAGCCTTCTTCTTGGGTGAGGAAGAAGACAAAGAGG  
 CCAAGGATAAGAACTCTGCCTTGCAGCTAAAACGATCACGCTATGACCCCAATAAAGTTTTT  
 TCTAATACGAACCAAGGTCCAGAAAAGAACAATTTAAAAGGAGAACAACCTGGATCACAAAA  
 AAAGTCATCAAAGTATGATGAAAAAATAACGTCAAATAATGAACTTACTACAAAGAAGGGTCT  
 TACTAGGTGACTCCGAGAATGAAACTAAGTACGCCTCTTCTAATTCTAAAATTAACGTAGAA  
 GTTACTCATAAAAATAAGAATGCAAAAGAAAATTGACAAAAATAACAGACAACGCATGTGGGA  
 AGAACAACAATTGCGAAATGCTATGGCGGGGCAAAGCGATCACCTGATGATATAACATTGG  
 AAGGCTCTGACAAGTACGATTATGTGTTGACACAGATGCAATGATTGATTATACTAATGAG  
 GAGGACGATTTACTACCTGAAGAGAACTTCAATATGAGGCACGTCTAGCACAAGCTTTAGA  
 AACTGAGGAAAAGCGTATACTGACTATACAAGAGGCAAGAAAACTTTTGCCTGTACATCAAT  
 ACAAGGATGAGCTACTACAAGAGATCAAAAAAATCAAGTTTTGATTATAATGGGTGAAACC  
 GGTCTGGTAAAACCACACAGTTACCCCAATATTTGGTAGAAGATGGATTCACTGATCAGGG  
 AAAGTTACAGATTGCCATAACACAACCACGTCGTGTGGCGGCCACTTCTGTTGCTGCAAGAG  
 TAGCAGATGAAATGAATGTTGTGCTTGGGAAGGAAGTGGGTTATCAGATCCGTTTTGAAGAC  
 AAAACAACCCCAATAAAACGGTTCTAAAGTATATGACGGATGGTATGTTACTAAGAGAATT  
 TCTTACAGATTCCAATTAAGCAAATATCTTGTATTATGATTGATGAAGCTCATGAACGTA  
 CTCTAGCCACAGATATCCTGATAGGTTTGTCTGAAAGATATTTTGCCGCAGAGGCCACTTTA  
 AAATTGCTTATATCATCAGCAACAATGAACGCAAAAAAATTTTCAGAGTTTTTTGATAATTG  
 TCCCATTTTCAACGTTTCTGGGAGAAGATATCCTGTAGATATCCACTACACATTACAGCCGG  
 AGGCAAACCTATATACATGCCGCTATAACAACCTATTTTTCAAATTCATACTACGCAAAGTTTA  
 CCGGGGGATATATTGGTGTTTTAAACGGGGCAAAGAAGAAATGAAAGAACAAAACCAAACCT  
 GGAGGAGATCATGTCTAAATTAGGTTCTAGAACAACAACAATGATTATAACTCCTATATACG  
 CAAATTTACCCCAAGAGCAGCAATTGAAAATTTTCCAGCCGACTCCGGAAAATTTGAGGAAA  
 GTTGTTTTTGGCAACTAATATTGCGGAAACTTCATTGACCATTGATGGTATTAGATATGTCAT  
 TGATCCTGGATTGTTAAGGAAAATTCGTACGTACCCTCCACTGGAATGACCCAACTTTTAA  
 CAGTTCATGCTCAAGAGCTTCAGTTGATCAGCGTGCCGGTAGGGCTGGTCTGTTGGGCCG  
 GGAAAATGTTTTAGAATTTTTACCAAATGGTCATATTTGCACGAGTTGGAACCTATGCCTAA  
 GCCTGAGATCACAAGAACAATCTTTCTAATACGGTGTATTATTATTATCGCTTGGCGTTA  
 CTGACCTAATAAAGTTTTCCCTGATGGATAAGCCCAGTATCCCACATTACGGAAGTCTTTG  
 GAAAATTTATACATTTTAGGTGCCTTAAATAGCAAAGGGACAATCACTCGGTTAGGTAAAAT  
 GATGTGCGAGTTTCTTGTGAACCTGAATTTGCAAAAGTGCTTTATACAGCTGCTACGCACG  
 AACAAATGTCAAGGTGTACTAGAAGAGTGTGTTGACCATAGTTTCGATGCTACATGAAACACCT  
 TCATTTATTTATTGGTCAAAAAAGAGATGCTGCGGCAAGTGTGTTAAGCGAAGTGGAAAGTGA  
 TCACATATTGTATTTGGAAATCTTCAACCAATGGAGAAAATCTAAATTTTCCAGAAGTTGGT  
 GTCAAGACCACAAAATTCAAATCAAACGATGTTGAGGGTAAGAAATATTAGAAACCAATTA  
 TTCAGGTGCAGTAAAAGGTTGGATTAGTTGAAAAGAACGACCAAGCCAGGATGAAGATAGG  
 CAATATAGCGGGCTACATAAATGCTAGAATAACTCGATGCTTCATCAGCGGGTTTCCGATGA  
 ATATTGTACAATTAGGCCCCACCGGCTATCAAACCATGGGTAGGTCATCAGGTGGGCTGAAC  
 GTTAGTGTTTCATCCTACCAGTATACTTTTCGTTAATCATAAGGAAAAGGCGCAGAGACCAAG  
 CAAATATGTGCTTTATCAACAATTGATGCTAACGTCGAAGGAATTTATCAGGGACTGTCTAG

TTATCCCTAAGGAAGAATGGTTGATAGACATGGTTCCACAAATCTTTAAAGATTTAATTGAC  
GATAAAACAAATAGGGGGAGGCGGTGA

>YDL240W 0.77 Cold

ATGATTCAAAATTCCTGCTGGTTATCGATCGCTGAATACTGCATCTCCGATGACCGTGCAGGT  
GAAGAATCAGAAGAAAATATGCGCCCGTTGTAACAAGTTAGTTATACCCGATAGCCAACGAA  
CTAAAACAACCTTTAAAGGCTCTCGGTAAATATTATCATGAAAGTTGTTTTACCTGCCAAGAC  
TGTCAGAAACCTTTAAAACCGAAGTACTTCCCATATCAAGTAGACAAGACAAGTGAATCTAT  
ATTGTTATGCCAATACGATTATTTTAGAAGACATAATTTGTTATGTCATGTATGTGATACCC  
CATTGCGTGGATTATATTATACCGCATTTCGGTTACAGATACGACGAAGAGCATTTTTTCTTGT  
ACAATATGTGCTACTCCTTGTGGGGTTAAAAAATGCTTCATGTACGGAAACCAATTGTATTG  
CAAGTACCCTTTCTCAAGTATTTTTCGAAACGTTGCAAAGGGTGCAGTTCCCAATATCGG  
ATCAATATATCGAGTTTCTAAAGGTGAAGAAATACATTGTTGGCATCCGGAATGTTATGGA  
ATTCATAAATATTGGCATGTAAATTTAGCAGCAGAAACTGTTGGTTTGCAGTACCTTCCCAA  
GCTGGAATATAACCCAAATTCGGGAGACAAAGATATAAACCCAACTGCCTACGAGTTAGATA  
AACAAATGCAGGCGTTTAACTTTATTCTATCTAAAACGTGGTCGGTTTTATATCGTTTTGAG  
GAAGAGGCAGCTTCTTGCAATTTCTGATATGTTTCAATATTTGACAAGCAATGATCAGTTAAA  
GGGCATAGAGTCTACGGGTCTGTTGGTACTAAAAATCGACTGTCTTTTCCGGGGACTGGATA  
CTTTAAACCTCTCGACGAACAAAAGTATGCCAGTTAACAGTGATCAAGAATGCATTGAAAAC  
AACGCAATGGCGGCCAGTAAATACAGCAAGTTTCCCAAAAATCTGTCCACAAAAATTATGAT  
ATATTTACAACCTTTAAGAAAAGTTAGGGACAGAAAACAAAAACGAAACTATCACAATTTTCAT  
CTTTTATGTCTGTTATTACTGGATTAGCCCATTTTTCTAAAACGTTAACAAGATTTGGGCTA  
TATACGGCTCTAGAAAACAATAAGTTGACTCATTCTGTTAATCCATTGTTGAGGTTTTTAAAG  
AGAAGTAGAGAAAATGAGCTTTTTGAAAATAACCCGTTTCAGTATATAAAGACTCCTGTTA  
ACGCCACAGATAGTTGCGCTGGATGCAATAAATACATACAGGAGGAATGCATTCAATTTTAT  
GAGCACCGGTGGCATATTGCTTGTTTTACTTGTCTTCATGCCATAAGAATATAAATCCGAG  
GAGTTTGACGGATCCACCTTTAATAAAGAGAAAAAAGATACTATGTTCTCACTGCTCAA  
TTGATGATCCGGCCTCTGTGCCGGTTTTCAAATTTGTTACTAAGCTAGCACAACTAATTTTT  
CTTCTAAAAATTGCCCTAGTCAAATCAAGAACGTGAATGTTGAAATCGAAAGCATCTAACAA  
GGTAGGCAGAAACTCTTTACAGAGTACTATGCTAAAGGAACACACTTACATTAGGACACTGA  
ATGATATTTAAAAGATTGAGATCTAGAAGAGAAAGTGTTCGGGTCACTCATAACAAACAACAA  
GCTAGAAAATCAGTGATACTGGAACTGCAGAGACAGATTTAAATGACCCGACAAAACAAGG  
AGATAGTAAAAATCTTGTGATTCAAACAGATGACCCATCATCGAGCCAACAAGTGAGCACAC  
GTGAAAATGTTTTTCAGTAATACTAAGACGTTGACACTAGATGATATTTACGATTTGTTGCC  
GCTGAACAAGCAAGGGAGCTAAGACCTAACGTTTTTGCACACTTTAAAAAACTAAAAGAAAC  
CGATGACGAACTTCGAATGTTGTTCCCAAGAAAAGCGGAGTTTTATTACTCTGAATTAAGTA  
CGATGGAACCTCTCGATGATAAGGGCTATCAGTTTGTCACTGCTAGCTGGTAAACAACCTGATA  
TCGAAGACTGATCCTAACTATACTAGCTTAGTCTCAATGGTCTTCTCGAATGAAAAGCAAGT  
CACAGGTAGCTTTTTGGAACAGAATGAAAATCATGATGAGCATGGAGCCTAAAAGCCCATCA  
CTAAGACTGTTTTTGGTGTCTCTTTAGATGTGTTGTGCGAGAAATGGGGTGTGATTCCGAT  
TTAGGTGTGGGGCCAGTGAAGATTAGGATCCCATAATTATTGACGAGCTAATATCATCTTT  
GAGGCAAATGGATATGTCAGTAGAAGGTATTTTCAGGAAAATGGAAATATCAGAAGACTGA  
GAGAACTAACTGCTAACATCGACAGTAATCCAACAGAAGCTCCAGACTTCTCGAAAGAAAAT  
GCAATCCAATTATCTGCTCTTTTGAAGAAAATTTATCAGAGAGCTTCCCAACCGATTTTATC  
GACAGACTTATATGAACTATGGATTAAGGCCGGAATAATGATTTAGAGGATGAGAAACAGC  
GTGTTATATTGCTAATATATTCCTTATTACCCACTTACAATCGCAATTTACTGGAGGCCTT  
TTGTCATTTTTGCATTGGACGTCCTCATTCTCTTACATTGAGAATGAAATGGGATCAAAAAT  
GGACATTCACAATTTATCCACAGTCATAACACCTAATATTTTATATTTGCGACATAAAGAAA  
TTTCCAATGATAACGTCCTGACGAACCAGAATCAGGTTTAGTTGATTCAATTCGCTCAAAAC  
AAGGGAGAAAATTACTTTTTGGCTATTGAGATAGTTGATTACCTGATTACTCACAATGAAGA  
AATGGCAATGGTTCGAAATTTTTAATGAATCTTTTAAAAGATGTGCAGTTACAAAAATTAG  
ATAACTACGAATCAATCAACCATTTTATTTCCACCGTTATGCAAAGTAAAACAATCGATTAT  
TCCGAATGTGACATAAAAACTCCTGTACAGTCAAAGATTCGACCACAACGGTCATACAAGG  
TGAAATAAACAAATAA

>YOL139C 0.77 Cold

ATGTCCGTTGAAGAAGTTAGCAAGAAGTTTGAAGAAAACGTTTCAGTCGATGATACCACAGC  
TACTCCAAAGACTGTTTTAAGTGACAGTGCTCACTTCGATGTCAAGCACCCATTGAACACCA  
AATGGACTTTATGGTACACAAAGCCAGCCGTCGATAAATCTGAGTCGTGGTCTGATCTATTA  
CGTCCCCTCACTTCATTCCAAACTGTTGAAGAATTTTGGGCTATCATTCAAATATTCCTGA  
GCCACACGAACTACCATTGAAATCAGATTACCACGTCTTCCGTAATGACGTTAGACCTGAAT  
GGGAAGATGAAGCCAATGCTAAAGGTGGTAAATGGTCTTCCAACTTAGAGGAAAAGGTGCT  
GATATTGATGAATTATGGCTAAGAACTTTACTAGCAGTTATTGGTGAAACAATTGATGAAGA  
CGACTCCCAAATTAACGGTGTCTTTTTAAGCATTAGAAAAGGTGGTAACAAGTTTGCCTTAT  
GGACTAAATCTGAAGACAAAGAACCCTATTGAGAATTGGTGGTAAATTCAGCAAGTTTTA  
AAATTAACCGATGACGGGCATTTGGAATTCCTTCCACATTCAGTGCCAATGGTAGACACC  
TCAACCATCAATCACCTTGTA

>YOR391C 0.78 Cold

ATGACTCCAAAAAGAGCGCTAATATCTCTTACTTCATACCACGGTCCCTTCTACAAAGATGG  
TGCGAAAACAGGCGTTTTTGTAGTTGAGATTTTGCATCGTTCGATACATTCGAAAAGCATG  
GTTTCGAAGTGGACTTCGTTTCTGAGACTGGTGGATTTGGCTGGGATGAACATTACTTGCCA  
AAGAGCTTTATTGGTGGCGAAGATAAGATGAACTTTGAAACGAAAAATTCGCTTCAATAA  
GGCGTTAGCGAGGATCAAGACCGCAAATGAAGTCAACGCCAGCGACTATAAAGTATTCCTTG  
CATCTGCTGGACATGGTGTCTATTTGACTATCCCAAAGCTAAAAATCTGCAAGATATTGCA  
TCCAAGATATATGCCAATGGGGGTGTGATCGCTGCCATCTGTCATGGACCGCTCCTTTTCGA  
TGGATTAATAGATATCAAAACAACAAGACCATTAATCGAAGGCAAAGCTATAACAGGTTTCC  
CACTCGAGGGTGAAATCGCCCTGGGAGTTGACGACATCTTGAGGAGCAGAAAATTGACAACG  
GTTGAACGCGTTGCAAACAAGAATGGAGCCAAGTACTTGGCGCCAATCCATCCCTGGGATGA  
CTACTCTATTACAGATGAAAAGCTAGTTACGGGTGTTAACGCAAATTCCTCCTATTTCGACCA  
CAATTAGAGCTATAAACGCATTATATAGCTGA

>YLR224W 0.77 Cold

ATGAATCAGAGCGATAGCAGCTTGATGGATTTACCCTGGAGATACATTTATCATTACTAGA  
GTACGTGCCTAATGAACTTCGTGCTGTCAATAAATACTTCTACGTTTTGCATAACCACAGCT  
ATAAGGAGAAGAGTTTTGGCGTGGATAGCTGAGGACAACCTATATATGGGCCGTTGTCAAACAT  
TCATTATGTTTTATATGTCAAGAGTTTGGACCCACTTCGACAGCATGCCAGAGAAATCATTCA  
AGAAACGAAGGAACCAGTTTTAATGTGCCACTGTGCATGACTAAATACATCGCAGATTCTT  
GGTATATTGTATAACAATGCGCTGCAATATCCTGGAAAGATAATTAATATGGGATGGGACAAA  
TATACCAAAGTCAAGATTCAAATGGTTCTGATTCTACCAGTAACTTTAATAGTCGGCCCAA  
GGAAAGAACTCTTATGCAGTCGTTGACAGCTTTACCTGTTAACTTTTGGTCCAGGAGGAAGG  
ACGAGCCTACACCGGTAAACGTTTGGTTTTATGTAAAAAATGCGCACGTTGCCAGATACATA  
CCGAAAATTATTACGGAAATAGGCATATGCAACTATGGGCCGAAGCAGATCGTGGCAAGTGC  
AGGATATATCAACGAATTGATAACATCTGAAGGAATATACTGTGTTAACCTAGGCCACCTTC  
CCAGGCTATACGATGAGCAAATTTTTGAAGGCACTGGAACGACACATCTTCCCCTGGAACG  
AAAGCTATCGACAGGACAGATTCAGATGTTTGTATCAATGGTGATTTAGTTCTACTCGGTTA  
TGACTTTATTCCATATCAGATATCGAAGCCGTGGTTACTCTTTAGAATCGAACCCGTAAATA  
GCATTGAAGCAATCTTCAACTATAGTGAATGTTCTTTTTTCATACCAGTTTGCATGGAGTTTG  
GCCTGCTTACAATCTGAAGAGAAAATTTCAATTCCTAGAGACACGATAATTGGGCACGGTTT  
ACCTTACAAGCCATCCAAATTGATAAGAATTTTCGTCTACAAGCATCCGGAACAAAAGCAAG  
ATCTTGGTCAAGAAATAGCATTGCCCAACTGGAATACCCCTTATCTTCGAAGATGA

>YPL099C 0.81 Cold

ATGTTAAAAAGACGCTCTAATGCTCTCATTACTTTGAGTAGAACTAAATGTTTCCCATAAC  
AACCGTTGCCTATTACCACAGGCGCTCCTCAACCAACAACGAAGAGCTGTTTCAACGTCAC  
CGAAGAAAGAAATCAAGAGCCTAGAAGACTTGGCTAATTTGGATTCTTTGGATGGTGTGAT  
ACTGAACTGATACGCGATTTGATTAATGAGCATACTACAAAATTAATATCAAAAAGGAGTT  
AGATATGCTCAAAAAATTCCTCGCAAGAGGAAGAATCAGGACATGAGATCCCTGTAAAAAGAT  
TTATTAGGCCTCTTTGGATGTTCTAATGGGATCTTCCGTTTATTTACTGCTTCACTTC  
TCTTGGTGGAAACTAGAGCATGAGGAGAGAGAAAGTCAGCTAAAGAAAGAGGTAGAAATCCT  
GGAACACCAATTAATGAGTTAATTGTACAGGATAAAAACCCACAATACTAGTAGGGGAAAGG  
CGAGTAATGAATCAACACATATGAAGCCTTGGTATAGGAGATGGTTTTGGTGA

>YOR005C 0.75 Cold

ATGATATCAGCACTAGATTCTATACCCGAGCCCCAAAACCTTTGCGCCTAGTCCAGATTTCAA  
 ATGGCTTTGTGAAGAGCTATTTGTGAAGATACATGAAGTTCAAATTAATGGAACGGCCGGCA  
 CTGGCAAATCAAGGTCTTTCAAGTACTATGAAATAATATCGAATTTTCGTCGAAATGTGGAGA  
 AAAACCGTGGGAAATAATATATATCCTGCCTGACTGGTTCTTGTCTCTCCCTACCGGATAGACG  
 AATCTATAATATTAAGGATTATGTATTAATAAGAAGTATATGCTCTTACTTGAAGTTGCCAA  
 AAAATTCTGCAACAGAGCAGCGGTTAAAAGATTGGAAACAGCGTGTGCGGTAAAGGTGGGAAT  
 CTTTCTTCTCTTCTTGTGGAAGAAATTGCTAAAAGAAGGGCTGAACCTAGCTCAAAAGCGAT  
 TACAATTGATAACGTCAATCACTATCTGGATAGTTTGGAGTGGAGACAGGTTTCGCTTCCGGAC  
 GAGGATTTAAGAGTCTTGTCAAGTCCAAACCTTTCTGCTGACTGTGTGGAGAATATGAGTTTC  
 GTCGAATTAATAACTTCTTTGATATCGTGCTTAAAAATAGAGTAATAGGAGGTCAAGAGCA  
 CAAATTGCTAAACTGCTGGCATCCTGATGCTCAGGATTATCTTAGCGTGATATCTGATTTAA  
 AGGTGGTAACTTCAAACTTTATGATCCAAAAGTTCGTCTAAAGGATGATGATTTGAGTATA  
 AAAGTTGGCTTTGCATTCGCCCCCAATTAGCCAAAAAGTGAATCTTCTTATGAGAAAAT  
 ATGCCGTACACTACATGATGATTTTTTTGGTAGAAGAAAAATGGATGGAGAACGAATTCAG  
 TTCATTATATGAATTATGGTGAATCCATAAAAATTTTTTAGTAGACGGGGCATCGACTATACC  
 TATTTGTACGGAGCGAGCTTATCATCAGGAACATATCTCAACATTTGAGGTTTACAGATAG  
 TGTAAAGAATGTGTTTTAGATGGAGAAATGGTGACGTTTGGATGCAAAAAGACGGGTGATTC  
 TTCCATTCCGGTCTTGTAAAGGAAGTGCAAAGGAAGCGCTATCTTTTAAATAGTATAAAATAAT  
 GTTGACTTTCACCCCTTATATATGGTGTGTTGATCTGTTATACCTGAATGGGACTTCGTTGAC  
 ACCATTACCCCTTCATCAAAGGAAGCAATATCTGAACAGCATTTTAAGTCCCTTGAAAAATA  
 TTGTAGAAATAGTACGATCTTCTAGATGTTATGGTGTGGAGTCAATCAAAAAGTCTTTAGAA  
 GTTGCAATCTCACTGGGTTTCAAGAAGGAGTTGTTTTGAAATATTATAATTCAGTTATAATGT  
 CGCCAGTCAAAAACAACACTGGATCAAGGTAAAACCTGAATATTTGGAGGAATTTGGAGAGA  
 ATTTAGACTTAATAGTAATAGGCAGAGATTCTGGGAAAAAGATTCTTTTATGCTAGGGTTA  
 CTTGTGCTAGATGAAGAAGAGTATAAAAAGCACCAAGGAGACTCCTCTGAAATTGTAGACCA  
 CTCAAGCCAAGAAAAACACATACAAAATTCAGAAGAAGGGTGAAAAAATACTTTTCATTCT  
 GTTCTATCGCAAACGGTATATCTCAAGAAGAATTCAAAGAAATCGACCGCAAACGAGAGGA  
 CATTGGAAAAGAACCCTCCGAAGTTGCTCCCCCTGCTTCAATTTTAGAATTTGGCTCAAAAAT  
 ACCTGCCGAATGGATTGACCCAGTGAATCAATTGTTCTAGAAATAAAATCACGGTCTTTGG  
 ATAACACAGAAACGAATATGCAGAAGTACGCTACCAATTGTACTTTGTACGGTGGCTATTTGT  
 AAAAGAATACGGTACGATAAAGAATGGACAGATTGTTACACACTTAACGACTTATACGAAAG  
 TAGGACGGTTAAATCTAACCCAGCTATCAAGCGGAAAGGTCACAGCTTGGATTGATACGGA  
 AAAAGAGAAAGAGAGTACTTATTTAGACAGCTTTTACCAAAACAGGAAACAACCTGCCAATT  
 TCAAACATCTTTGCCGGATTACTTTTTTTATGTTCTCTCTGACTATGTCACGGAGGACACTGG  
 AATACGGATTACACGGGCAGAACCTGAAAAAACTATTGTGGAACATGGTGGTAAACTGATAT  
 ATAATGTAATTTTAAACGTCATTCGAATTTGGGACGTTTCGGTTAATCAGCTGTAAACTACC  
 ACGGAATGCAAGGCTTTAATAGATCGAGGATATGATATATTGCACCCAAATTTGGGTACTCGA  
 TTGTATAGCATATAAGAGGCTCATCCTGATCGAGCCCAATTATTGCTTTAACGTCTCTCAA  
 AAATGAGAGCCGTCGCTGAAAAAAGGGTAGATTGTTTTGGGTGATAGTTTGAATGACATT  
 TCGGAAACCAAACGTGCATCATTTGTATAAATCACAACCTAAGTCTACCACCGATGGGGAACT  
 CGAGATAGATTCTGAGGTTTCGGCGGTTTTCCATTATTTTTATTCTCCAACAGGATTGCATACG  
 TACCACGTGCAAAAATTAGCACAGAAGATGACATTATAGAAATGAAAATTAAGTTGTTTGGT  
 GGAAAAATAACAGATCAACAGTCACTTTGTAACCTTAATAATTATACCATATACTGATCCTAT  
 TTTGAGGAAAGACTGCATGAATGAGGTACACGAAAAAATAAAGAACAATAAAGGCTTCTG  
 ATACTATACCGAAAATAGCCAGGGTCTTGGCCCTGAATGGGTGGATCATTTCTATTAATGAA  
 AACTGTCAAGTGCTGAAGAAGACTTCCCCGTAGTCAACTACTGA

>YGL133W 0.8 Cold

ATGGTGTATATAAAAGGAAACCTATATTACTTCCCTGATCCAAAACCTTTACCATTGGATTT  
 GAATGTACAAGTATGGCATATTGAAGAGACTGGAGAATGGTTTTCTAGTTACGAAGAATTTT  
 TAGAAAGGTTTTGATTTCTACACACGCCACCATTTTACATGCGAAATCACTGGTACTTCTTGC  
 CTGACTTTTTTCCAAGCTCTGGATAGTGAGGAGACACAATTCAAATACGTGCAAGACAGATT  
 CCCATTAAGTTGAGAGAACCAGTTGCAAGATTTTTTACATTTTAAACGGAATAAGAAGGTTAG  
 ATGCATTGGTGGAGAAAGTTTACGCAAGATTTAAAAATGACTTTTTTCCAGGAGAAGTTGTT  
 TATCTACGTAAACAGAAAGACTCTTCTACCACAAGCTCTAATTTCCCAACAAGTACTCCTCA  
 ACCTGATGATATGGTCAAAATCAACAGTGTGGTAAATCCTGGCTTACCGCAGTACCAATACC

AAAGACGTTATGTTATCAAAGAAAAGGTCCAATTTAACGCAACGATAAATCCAGAGAGCAGG  
 GAAATTTGTGATGCCCGCTCATACTAAATACATGCTGATAGAAGAAGCAGCTTCCAGTAATAA  
 ATCCTTCATTGTTGATCAAGGACAAATTTACAGGGACCGTCCACTTTCCTAAGCACTTAA  
 TCAAATGTTTTTCAAGATTACTTTACAGAGGGCATCTTCGAAAATGGGTGCACCTTGGTGT  
 GTCAAACCGGAATATTTAGCGATGTATGGTTAACGATGGAATGGCCAAAAGATATGTTAAA  
 ATATAAAGAAGATGAACCTGTCGTAGCAAGACGTTCCAACAGTGCCAATGTTTCATCCCCAG  
 AAAGTGAAAAGAATAAACGTCAAAGTAAATCATCGGGTAAAAGTAACACCTCAAACGATGCT  
 TCTAACAAAAAGAAACCAAGAAAAAAGAAAGCCAACCGAAGTAAATGATTCTGAGAATAA  
 TTCTTCGGAAGAAGACAAGAAGAAGGGTCAAAATGTCACATCAGAAACACATTTCTAAAAAAA  
 GGAAAAGGAAGCCAATGAGGAACCGAACCGGAAAACGTCGAAAGCGTTCCTACACCAGCT  
 AATGCGGAGCCTCAGGCTGTAACAATAACGAGCATAATGGATGACCTAGCTTTGCCATATCA  
 ACATCCACCGAACATCTTTCCAAACTTAACGTATTATAATGAAAAATTAGAATGTATTTTCAT  
 TAGGTTCTACAAACTTTCCAGACCTTTTGATTCTTTTGGAAAGCTATTACAAGCCTATCAG  
 TTTCTGAATACGTTTGGTTCGAAAATTTGTCTCTCTCATTTTAGCCTTGACCAATTCATTAC  
 TTCTTTGAAATGTACAGACCCATATGAGTTAAAGGGCGAAGTTGTTTTAGTGAACATAAGAA  
 CGCAAACGTCTAAAGAACAAGAAATGAAAAAACGGCCTGCCGATGAAAAACAAAGCAGAG  
 ACTACTACTGAGGAAGACTCTGAAAACCCAAGTGAAGTGGCAAAGAAATTCATTTATTCTGTA  
 TATGATAATGAAAAGAAATTCGACAAGGTTGAGTACAAGATTGTTACAGATGACCCAGCAT  
 CCGATGATATACTTGATAATATCAATCATAATGGGTCTGCTCTTCTCATTGAAGTTTTTACT  
 GCGCTCTTACGTTTGTTCATCAACGAAGAAGGCGATTGGAGTTGCATCGTCTGAAAACCTG  
 GATAATAGACGACAAGGGAGTCTTATGGAGAGAAAAGATGAAAGAGGGGGAGGGGGAGGCGA  
 AGCAAAAACGAAATGCTCACGGTACTTTTTTACAAGATAAGGAAAAGATCGACAACCTAAAG  
 GACACATTAAGGAAAACGCAACGAAAGTTCAAAAAGAATCAGACGCTAAAAACGAAACAAA  
 TTCAGAATCTGATTCTAAATCTGATTCTGACAGTGAAGAACGAGATCCTAAATTAGAAAAGT  
 GTTTGAACTACCGCAATGTTAACTGGATAGAACGCTTGACGAAAAGGCAATTTAATAACAGT  
 TACTGGCTAATAATTTTTACTGGGAGTCTTAGAAGATTGTAGACATCTTCCCATGTATACAGA  
 GTTTATTGATTCTTTCATAGAAAAGATCATAACCCAAAGATATATCAGCTACTCAATTGCCCA  
 AACAGCTTTGGAGAAATTTCTGTGCAAGCTGTCTGTTTCAAGTCAATGCGCTGTGG  
 ATACTTGTAGATCTCGTATCGCATTTTTTCTCCAGATATCAAAGCTGCTGTAGATGATCCAT  
 GGAACATATGTGGTCAAATTCGTAGCGAAAAGATTCAAAGTTGCGAGAGAGTTGAAAACGGAGG  
 CAGCCGTCTTAAGTAATCTTCAAGGCGACCTGCAGGCAATTCAGAGAAGTTAAATAAAACA  
 GATGAAAACACACCATCAGCCGATGGTGCCGATAAAAAAGATGATTCCGAATCAAATAGTGA  
 ACCAATTGATCTTATTATCATTGAGAAAAAGCAAAAGTTAATTGAAGAGCAGGATAAAAAGG  
 TACAAGCTTTACAATCAGATAAAAATTTCTCGATAAATTGTCTATTTGAAAACGATCTACAA  
 AGATTAAGCCGTTGGGATTGGATCGATACGGGAACAGGTATTTTTGGCTGGATCACAAATGG  
 TGTTCATTTCTCAATATCTGCTGGTATGAATGAGACGCCGAAAAGTAACAATAGTTTGA  
 GTTATCACTCCGGTCTGTTTATTAATTCAGGGACCTAAAGCATCATCGGCGAAATTTCTTTTGG  
 AACGTCAGTGATGAGCAATTGAGCAATTGGCAAAAAATCAGAAATTCGGAAGGAATATCCGA  
 GGCAACTAGGGAAGTATTTGGTATCTCCAAAACCTAGTTCCGGATCTTATAATTACGTAGAAA  
 ATGGAATAGAGGTCGAACTATTGGACAGTAATGATCGCGTAAACCCACTTATAGAGCTGACA  
 CCTATTCAAAAGAAAATTATGGATGAAACACCTTCAAGGTTGCTACTATCACCAGATCAATG  
 GTATTGCATTGACAAGTTAGAGGACTTGTCAAGAATAATGGACTGGTTAGATAATTGGGGTCT  
 GCAAAGAGCATGATCTCTTGAGGCAAATCAGACCCATAATGGAACGAATTAAGTTCCCTT  
 AGCTTGCGCGACCATGCGCTGTCACTGACAGCATTACCAAAAATGAAGAAAAGTTGCTAAA  
 GGAGTTAGAAAATAATGAATTTACCGAAAACGAATGAAAGTTGATAGTATGGATGTTGATG  
 ATAAAAATAGCGGTGTTAAAAGTGAGGTTGATGTACAGGTTGATGCCGAAGAGAAGAGAGAA  
 GCTGTGATAGACGAAAAGTTGGAGGTGATTGCAGACGAACTCATGAAGCTAGATGATAGCTC  
 GAAAACACGCAATGTTCTTAATAGAATACAAGAATTAGAAGATCAGAGAGATGAACTCTTGG  
 AACAGAAAAAATCCATAATAAATTCGCAGAGGCCAGGCGGAGGATTTAGCCCGTTCAGAA  
 AGGAAAAGAACCAAAATCTCCCGTGGTAATAAGGTGAATAAGCAGATTGAAATATTGACTGA  
 CTTAGTCAATTATAGACATTTTAAAGCTATGGAAGATGTGATAGCTTGGAAAAACGTTTGTAG  
 CAAATTCGATATGGGGTTCCTCACTTCGCAAAAATGCATCTGGTAATAAAAAGGAGTGGTGTCT  
 ATTGAAACAGTAGACGATAAATTAAGATATAGTGGGCCAAACCTCAAGAACAGTAACACC  
 TGCCCCAAATTAA

>YER162C 0.81 Cold

ATGAATGAAGACCTGCCCAAGGAATATTTTGAAC TAATAAGGAAGGCTCTTAACGAGAAAGA  
 GGCAGAAAAAGCGCCCCTGAGTAGAAGAAGAAGAGTCAGAAGGAAGAACCAGCCCCTACCAG  
 ATGCCAAGAAGAAGTTTAAAACAGGGTTGAATGAATTGCCACGAGAAAGCGTTGTTACTGT  
 AACTTAGATTCTTCAGATGATGGCGTCGTTACGGTACCGACGGATGATAGTGTAGAGGAAAT  
 CCAGTCATCTGAAGAAGATTATGATTCGGAGGAATTTGAAGACGTGACAGATGGAAATGAGG  
 TGGCCGGTGTAGAAGATATATCTGTTGAAATTAAGCCCTCTAGTAAAAGGAATAGTGATGCT  
 AGAAGGACAAGCCGCAACGTTTGTCTAATGAAGAACGGAAAAGGAGAAAATATTTCCACAT  
 GTTGTATCTAGTTTGCTTGATGGTTCATGGATTTATACGAAATGAATGGATTAACAGCAAGC  
 GCTTGTCTAGAAACTGAGCAACTTAGTTCC TGAGAAAGTGTGTTGAGCTACTGCATCCTCAG  
 AAAGATGAGGAACTCCCCTTAGGAGTACTAGGAAAT TATGATGGGTGAAAGAAATGCAT  
 GGAGTTATGGCAAAAACACTGGAAGATCACTAAAAAATATGATAATGAGGGACTTTATATGA  
 GAACCTGGAAAGAAATGAAATGAGCGCCAATAACAAAAGAAAATTC AAGACGTTGAAAAGA  
 TCTGACTTTTTAAGGGCCGTCAGTAAAGGTCACGGAGATCCTGATATTT CAGTGCAAGGTTT  
 CGTTGCGATGCTCAGGGCTTGTAATGTTAACGCACGACTTATCATGT CATGTCAACCGCCAG  
 ATTTTACCAATATGAAGATTGACACTTCTTTGAATGGAAA CAATGCGTACAAAGATATGGTC  
 AAGTATCCGATTTTTTTGGTGTGAAGTGTGGGACAAATTCCTAAGAAA TGGATAACTGTTGA  
 CCCAGTAAATCTCAAAACCATTGAACAGGTCAGACTTCATTCCAAGTTGGCACC GAAAGGCG  
 TGGCGTGCTGCGAAAGAAATATGTTGAGGTACGTGATTGCTTACGATCGGAAGTATGGCTGT  
 AGAGATGTAACCTCGAAGATATGCCAATGGATGAACTCTAAAGTAAGAAAAAGAAGAA TTAC  
 TAAAGATGACTTTGGTGAGAAATGGTTCAGAAAAGTGATAACAGCACTTCACC ATAGAAAAGA  
 GAACCAAAATTGATGATTACGAAGATCAATATTTTTTTTCAGAGAGATGAAAGTGAAGGCATA  
 CCAGATTCGGTGCAGGATTTGAAAAACCACCCATATTATGTTTTTAGAAC AAGATATCAAACA  
 GACTCAAATTGTAAAGCCAGGATGTAAAGAGTGTGGATATTTAAAAGTACATGGAAAAAGTTG  
 GGAAGGTTTTGAAAAGTTTATGCAAAAAGAGATATTGCGGATTTGAAAAGTGCTAGACAATGG  
 TACATGAACGGCCGAATTTTTAAAACCTGGTAGCAGGTGTAAAAGGTGATAAAGAGGACAGT  
 TGGAAGGCCTAAGGGCGAAGCAGAAGAAGAAGATGAAAGATTATATAGCTTTGAAGACACAG  
 AATTATACATCCCTCCATTAGCCAGTGCAGCGGTGAAATAACCAAGAATACATTTGGAAAC  
 ATCGAAGTTTTTTGCACCAACGATGATACCTGGTAACTGTTGTTTGGTTGAGAATCCTGTGGC  
 AATTAAAGCTGCTAGTTTTTTGGGGGTGGAATTTGCACCTGCTGTAACCTCTTTTAAAGTTTG  
 AACCGGCAGTACAGTTAAGCCAGTTTTTAAGTGGCATTGTTGTTGCAAAGTGGCTCAGAGAA  
 GCTATTGAAACCGCTATTGATGGAATAGAGTTTATTCAAGAGGATGATAATAGGAAGGAACA  
 TTTGCTTGGTGTCTTTGGAGAGTTGGAATACTTTACTGCTAAAAC TCGTATTTCGTAGCAAGC  
 TGAACCTCACATATGGTAAAATTGCCGAGGAAGAACCTAACGTTACGAAGGAACAGAATATT  
 GCGGACAATCACGATAATACGGAGACTTTTTATGGGAGGTGGGTTCC TACCAGGTATAGCAA  
 CCACGAAGCAAGGCCGTATAGTGAACCTTCAGAGCCAGAAGATAGTTT TAGATTATGTTTCTG  
 TTGACAAAGCGGAGGAAAGTGCTACAGACGACGATGTCGGGGAGGATTATTCGGATTTTATG  
 AAAGA ACTAGAGATGTCAGAGGAATCAGACTGA

>YKL047W 0.76 Cold

ATGAATTCCGGAGGTGAAGAACCAACTATAAAGCCAAATGTATTTAATAT TACTCAACTTTT  
 AAAC TCAATGGTGAAAAACCGGAATTGCTTG CATCTTCTTAAGTAAATTTGACATGAAAA  
 AGGGAAATATCATAATATGGTCTAAAAGTATTAATGGT GCGCAATTGACTTAAGCAATATT  
 GAATTTAAATCGTTACCAGCCGGTATTCACGAACAAACTGACGATGTTGTCAATTTTGTAGT  
 TCCTAAAGAATTAGATGTCTGTCAAAC TCCAAGACGACAACCTTATGATTACGGCATCGCCT  
 ATTTCAAACAAAATTCGTTTCGATATTATTGAGAATGACAATCGTATTGATAGGAGTAAAGTT  
 CAAATGTTTTCTCTTGGTGTAATTATCGATGTCCAAAATGCCTCATCAGATAGTAAAAAGCA  
 CTTTTATAAGGAAATATACCATGCGTATGCTGCCAACAGATACTCAAGCTATCTAGAAAAGTT  
 TACTCGGTCAATGGATAAAGGCAGCGTGATCTTGATAAGTTTGATATTTT GAAAAGTTTTTT  
 GACGAGAATAACCAAGGGCACATGGCTGAAAATTCAGTAGAAGTCTTTGAACATTCACCCAA  
 AGAAAGACGGCATTTGGTTGAATATTTGCCATACTGGACAAGGAAGTTAGGGCCTCTCATAT  
 TTCCACTTTGGAAAGCAAGTCTCCTTCAGTCAAGGATATTGATACTAGTTCCTCAAGGAGAA  
 TCGTTCGAATTGTGCAATCTTTGGCCTATTGTGTCTTCTTAATATCAATGCTTCCAAAAAA  
 CTTGATAGGAAACCATGTAAGCGATGAATATATTAAGCCTATTTT CACGGTATCAACATCAG  
 ATATTCCTTTTCTAGAGTCGTTCAAAAAGGGGAACGGTTATGTGGCTACGACCAGCGAGGAA  
 ATTTTGTGTGATAAGCCTGAAATTTACGACATAGTAGTCAAAC TTA CTTCGAGCTCAACTAT  
 AGAAGAATCACCAGAAAAAGAAGTGGAATTCCTTACCGCATCTGGTGAACAAAACAAAGCAA  
 CTCCTCTT GACTTAGAGGTGTATGAAAAACTTATACTGGGGGAGTTACAAGAGGATGCCCTCT

ACAAATGCGACATGTCGACATCATGAGGTGACAGAACCCATATCATGGCTACAGTTTTTAAT  
 TGATGGGTTTTTTCTTTTAACTACTGCAGGCTATCTGGTAGCGCCATATCACCTTGCAAATA  
 ATTTCAAGATTCGAGGCACGTTTCTGGCCAGAACCCAACAATTCAGAAATACAGATCGCT  
 GAAAATTTAGTTCGCTATTTTCACCGCAGAACATCAAATCTGTACAACGATCTGAAGGATGT  
 CATACAAAAAAGTGAAAATATTGATTTCAGAACCAACCGATTACTATCGCAGCTTCATTTTTAA  
 CCAAGTTAAATTTGGATTGCTTTAGCAAACAAGATCATCAATTCGTCAAGGATATCGCCCTT  
 AAATGGTTCCAAAGAAGCATTGATATTAGCAACCTACCAGAATGTTTGGGAAATCTCTGTTA  
 A

>YBL009W 0.75 Cold

ATGAATTTTGATGCGGTAGCAGATCAACAGATGACTGACAGAAGGTATTTGCTCTCGAAGT  
 AGCAGAAAGCGATGATGCCGACAGCTCATTAATTTCTTCATCCATGGGAAGCCCCGCAGTGG  
 ATGTAGGAAGAAAAGTTTACAAAATCACTTCGCACAAGGGTTCAGCAGAAGATGAGAGTCAA  
 TCCTTTTTTACTTCTTCAGATTTCTCCAACATCCAAAACAAGGCCTGTAGGTAACCATCGA  
 AAACGATGATTACTATGGTAAAAGATCTTCTACAGGTTTCATCGCTCAAAACAACCTTTCAATA  
 AAATTAATATTAATGATACCGCTCACTCTTCAAACAAGAAAATGTATCTCAGTCGGTGCTA  
 TCGGAAAACAAGCTGCTCTCTCCATCTAAAAGGTTGTGCAAGCAAGGCTTACAAAGGTGAC  
 TAACTCCAAGTTTCGTACACCCCTTGAGACCTATTTCAAACCAATCGACTTTATCAAGGGATG  
 AGCCTGTTAAAGATTTTAGATCACTTAAGTTTCGGAGCGGTAGTGATTTCAAATGCTGGGGT  
 GACGAGAAGACAAGTTCTCATGTTTCATTCATCCAGTGTGAACTCAGTTAATTCCTTTACTTC  
 TACCACCTCTTCTCAAAGTGGAAGTTCTGAAAAATGATAACCTATTGTCGAGGTTCGCTAT  
 CTTCCAGATCTGTGAATGACCAAGATCCGAACTTTGTTCAGCCAAAACCAACCAATTCGTTA  
 CAAAAGAAGTCTTCAATTTCAAGTTTTTCACAATTTCTATTTTTTGGTGGTGGCAAACACACAGA  
 GAAGAAGAGGAATTTCTGGATTTATTATGCCGATCATCAGAGCACGAAGGAGCTAAACCACA  
 AACATTCATCATCGAACCTTTCTTTTAGAAGTTTGAAGCATAAAACATCACATTTCTTACTA  
 AATAAGCTCAAAGTAAGGCGTAAAGGAAATACACAAGAACTGAATCATCCGATCAAAAAAAC  
 TTGCCAAATATCATTTGCCTGTTCCAGACCAAGTCTCAAAGGACAAGATTCAACTGAAATTTGA  
 AAAATTC AACATCATTGGCATCCTTATCTTCAGAAGTCACTCCCATAAACACTTTGGACTAC  
 AATGATTC AATTTTGCAACAAATATTACAACCTTTGTGATGTTAAGTATATATTACATGATCT  
 ACGTGAAGCTCAGTCATTAGGCTTGTTTACGTTGAATACTAGATCGGTTTCAGCTGTCTCATA  
 ACTTTTGGCAAACCTTATCATAGCGATATGCAAACCTTCACTCATTTGCAAGAAAGTATGTCTA  
 GGGGCTCTAAGTGATTTGACTACTTCAAACCTTGATATCCTTACATGAATTGAAATCATTACG  
 GTTAATACAAGGAAGTAGCGGTGTGCGCAATTTACTGCAAGCTTATGTTGTGCCCTCAAATC  
 AATGTGAAATGACCAAAACCTTGATACTGTACTTATTTTTTCAAATACCAGGGAACCTCTTA  
 TCAAGGTGCTCTAACATTGATTACTCTCAAGCATTGTCTATTTTTCTGGCAGTGCAGCAGTAT  
 TTTATATGTTGCTGAATCCAAATTTTCAAGCTCGAACACAGGAATCTAACTTTGGACCATATTT  
 TGATAGACTCTAAAGGGAATGTTACTTTAATTGATATGAAGTGCTGTGCTTTCTTGAATATA  
 GACAACAATAAGGCTTCTTATAACAAGATTAGACCATCATTATTTCTTCCAAGGCCGGGGGAC  
 TCTTCAATTCGAGATATATGAACTGATGAGAAGCATGCTGCCTCAGCCAATATCCTGGGCTA  
 CATTTGAACCAAGAACAACCTATTATGGTTATATCACCTAAGTAGCAGCCTGCTAAAAATG  
 GCCAAAAAGCCGTAGTCAGCGGCGCTTTGAACCGGGAAGAAAATATCTTAATCGAGTTGAC  
 GCACCTACTCGATCCTGCTCGAAAACATTCAAAACAATTTCAAAGGAAGAACTTGTATAA  
 GAACCTGCGGTGATTTGTTATCTTTGAAGGGAGAAATAATGCAGTAA

>YKR023W 0.82 Cold

ATGACAAGAAAGCAGGCTATTGACTATGCAATCAAACAAGTTCCGCAAATATTGCCTTTGGA  
 AGAGTCTGATGTAAAAGCGCTGTGCGAACAAGTACTGAGTACATCATCTGATGATCCAGAAC  
 AAATTGCTTCAAATTTTTTGGAGTTCTTAGGTCATGAAGATCTATCGTTTGAATTTGTAATG  
 AAGTTCAATGAATTATTGAATCAGAATGATAAAAAAGAGGAAAAAAAAAACGAAAAATGTGCA  
 TCTTGAACATACTGCCCCACTTCATGGAAAAATGAATCAAACAGCCCACTAATAACTATA  
 TCAATAAGAAGGGAGATGAAAAACCAAAAAATTAAGGATGAGAAGAAAAGCTCGACAACG  
 AGGCCCTACCGTTCAACCATCAAATCAATCTACGCAATCAAACCCATAAAGGAGAAAAAAGA  
 GCACAGATCAAAGGGGAAATTACAATCGTTACAAGAAATAGACGAAGCAATCAAGATGCTAG  
 AGCTTCGAGATAGCGGTTCTTCTAAAAATTTGTAATTTGTCAAGGTACAAGGCATCCAGTTTTC  
 GACATCGCGCCAAACTGTCTTCACTGTGGTAAAGTGGTTTGTGTTATAGAGGGATTGAATAA  
 AGGTAAATGCGGTCAATTGCCATGAACAGTTGATTTCTGATAACGAAAGAACCCAAATGGTAG  
 AAATTTTTAAATCAGGAAAAAACGAACTAAACGGTTTCATCATCGTCCTTATCCAATGCGTCA

AATGGAGCTAATGTCCCAAAGAAGAAGACTAAAACCTACAAAATAACTTCCGGTATGGGTAA  
 AAATTTATTTGCTGAACAGGACAAATTATTTGATTTTCATCGAAAGGAAAAGAGAAAGAGAAA  
 GAAAGCGTAATGAAGTGTGAAATTGCAGGAGGAAAAAGAAGAGAGCGAAGCAAAGGAAAGA  
 CAAGCGAGCGAGCATGACCATAAAGCTGAGGAAAACCCGGAGTTGTTAGCAGCACAAGAACG  
 ATTAGATAGACTTTTATATTTCCAAGACTTTCGGCAGAAAAGAACAAAAATTATTGATAATG  
 CCAGCGATTTTGACATGAATCAGGAGGTGGGTTTATGGGGCAGCGCAAGAGAAAGAGCTCTT  
 GCGTTGAAGAAGCAACAACGTAATTTGAGAAAAGTGGGAAAAAGTAGAAAAGGAACGGAAATGG  
 CAGGCGGAGAAGTACGTTGTTAGCATGAATATAGGTTCAAACGGTAAAGTTACTATGACAG  
 AAGTCCCTAAGGATACAGAGAACGTAATTCGAGGTTTCAGATGATGACATCAGTGATATAAGT  
 GACGAAGAAGATATCAGCGACCTTAAACATATACACGCTCTGAAAAGTGAAATAAATAACAAC  
 GAAATCCTTGAGAAATTTGCATTTACAGTCCAAAGCATGGGATTACGAACGTGATAAAAAAC  
 AATTCGATAGGCCACGTATGTGAAAAAAAATTCAGATACTGCACAACAGAATAGAAAAACG  
 GAAGAAAAGGCTCACGACATGCAAGCTTATGATTTAAAGTCAAGAGTACAAGTGGACCAAAA  
 TGCAGACGCATCAGTAGAACAGAATATTCTTGCTGTACTTTGA

>YOR262W 0.82 Cold

ATGCCCTTCGCTCAGATTGTTATTGGTCCACCAGGTTTCAGGGAAGTCAACCTATTGCAACGG  
 CTGCTCACAGTTCTTCAATGCCATCGGAAGACATTCCAGGTAGTGAATATGGATCCTGCTA  
 ATGATGCCTTACCTTACCCATGCGCTGTGGATATTCGTGATTTTATAACATTAGAGGAGATC  
 ATGCAAGAGCAACAGTTAGGCCCTAATGGAGGTTTGATGTATGCTGTTGAATCATTGGATAA  
 TTCTATTGATTTGTTTCAATTTTACAGATCAAGTCACTTGTAGAAGAAGAAAAAGCATATCTTG  
 TATTCGACTGTCCGGGCCAAGTGGAGCTATTTACTCATCACTCATCTTTGTTCAACATCTTT  
 AAAAAAATGGAAAAGGAATTGGACATTAGGTTTTGTGTTGTAATTTGATTGACTGTTTTTTA  
 CATGACATCCCTTACAAATATATCTCGATTTTGTACTTGCATTGAGGTCTATGTTAATGA  
 TGGATCTCCCTCACATCAACGTTTTTTCTAAAATAGATATGCTGAAATCATAACGAGAAATTA  
 CCCTTTAGATTAGACTATTATACAGAGGTCCAGGATCTGGATTATTTGGAGCCATATATTGA  
 AAAGGAAGGCTCTAGTGTACTGGGAAAGAAATATAGCAAGTAACTGAAACAATCAAAGAGC  
 TAGTCTCAGATTTCAACTTAGTATCATTTGAGGTTTTGTCCGTGGATGACAAAGAAAAGTATG  
 ATAAATCTTCAAGGTGTTATAGATAAAGCAAATGGCTACATATTCGGCGCATCCGAAGTTGG  
 TGGTGATACCGTGTGGGCTGAGGCTTCGCGAGAAGGTGCATTAATAGCGAATTACGACATTC  
 AAGACAGGTGGATAGACAATAAAGAGAAGTATGATAAAGAAGAAGAAGAAAAACGTACGGCG  
 TTGTTAAAAGAACAAGAATTGCAAAATAAAGCTGTTGATGTGAATGAAGAAGATGAGTGGGA  
 AAATGCGCTGAAGGAGTGGGAAGAGAAACAAGGAATGGATTTTGTAGGTAG

>YDR017C 0.8Cold

ATGGATACCTCTCACGAAATTCATGATAAAAATACCCGATACATTAAGAGAGCAGCAGCAGCA  
 TTTGCGCCAAAAGAGTCGGAAGGGTGCATAACAACATTGAAAGATCTTAATGTACCTGAGA  
 CGAAGAAACTTTCCCTCCGTCTTACATGGCAGAAAGGCGAGTACATATTTAAGAATTTTLAGA  
 GATGATGAATGTTTAGCCGATAACAACAATGGTGTAGATAGCAATAATGGCGGGTCCGTGAC  
 ATGCGCGGACAAAATAACAAGGTCAGAAGCAACTCCCAAATCGGTACCAGAAGGACTACAAG  
 TTTCTGAAAAAAGAATAAACCAGATACTTTGTCTCTTCATTGTCAAGTTTCATTTTATCT  
 AACCACGAGGAGCCGGCAATTAAGCCCAATAAACACGTTGGCGCATAGAAAATAATATTACTGA  
 GACAGGTCAAGGCTCTGGTGAAGATATCGCAAAACAACAATCACACCAACCACAGGTGTTAC  
 ACCACCAGACTTCTTTAAAGCCAATTCAGAAATGTTGATGAGGGATGTATTTGCGCTAAGTCC  
 ACTTATCAGGAGAGCTTACATGGAATATCGGAGGACTTAACGTTAAAGCCTGTTTCTCTG  
 AACATACTATCCTCACAAAAGTAAAGCAGATTCCTGGTTATGAAGAAAAGGATAAAAATGGAAA  
 ATGATATTGATACTATTTCAGCCTGCCACCATAAATTGTGCCCTCTGGTATAGCGACTTCCCT  
 AGTTCATATAACCGACATACTTTCAAAGTTAAGACATATCAACTTTATCACAATCCCTAAG  
 GCAAGAAAACGTCAACAATCGTAGTAACGAAAAAAAACCTCAACAGTTTGTGCCACATAGCG  
 AATCAATTAAGAAAAACCCAATACGTTTGAACAAGATAAAGAAGGCGAGCAAGCGGACGAA  
 GAAGAGGATGAAGGTGATAATGAACATAGGGAATATCCCTTAGCAGTTGAACTAAAACCATT  
 TACGAATAGAGTTGGAGGTCACACTGCAATATTCAGATTTTCGAAGAGAGCGGTTTGTAAAG  
 CTCTAGTGAATAGAGAAAACAGGTGGTATGAGAATATAGAGCTGTGCCATAAAGAATTATTG  
 CAATTCATGCCACGTTATATTGGTGTCTGAAATGTTAGGCAACATTTTCAGTCAAAAAGATGA  
 CTTTTTAAGCGATTGGATCAAGAAAAACAACGGTAAAAATGATACCAGTAATGAAAACAAG  
 ACATAGAAGTCAATCATAACAATAACGACGATATTGCGCTTAATACAGAACCACGGGGACC  
 CCCTAACACACATACATTCTTCCCCTTGGAACATTCGTTCGAGACAAGTACTTGAAAAAGA



GCATCCTGAAATTGAGTCTGTCCATCCACACGTGAAAAGATCACTGTCAAGTTCCAACCAAC  
 CTTCTTGTGGCCGAGGTTGTATTAATGATAACAGGCATATTATACCGGAATCTCTGTGG  
 TACAAATATTCCGATTCTCCAACTCGGCACCGAATGATTTCGTACTTTTCGTCTCTCTC  
 TCATAACTCATGTTTCGGTTCGGTGAGCGTGGCAATACAAATAAATTAAGACGCGATTCTG  
 GGTCCACCATGATCAATACTGAATTGAAGAACCTAGTCATAAGGGAAGTATTTGCACCGAAA  
 TGTTTTAGAAGGAAAAGAACTCTAATACGACTACAATGGGAAACCATAATGCGCGTTTGGG  
 TTCCAGTCCATCTTTTTTAAACACAAAAATCAAGAGCCTCGTCCCATGATGCATCGAATACGT  
 CTATGAAGACTCTTGGTGATTTCATCGTCACAAGCGAGTTTACAGATGGATGACTCGAAAAGTC  
 AATCCGAATTTGCAGGATCCTTTCTTGAAAAAATCGCTTCATGAAAAAATATCTAATGCTTT  
 AGATGGCTCGCATTCAGTAATGGATTTGAAGCAATTCACAAAAACGAACAAATAAAACATA  
 AAAACTCTTTCTGCAACTCTTTATCACCCATTTCTCACTGCAACCAATTTCTAGAGATGATGGC  
 GAATTTGCCACCTCCCCGAATTATATCAGCAACGCACAAGATGGTGTTTTTGATATGGATGA  
 AGATACGGGAAAACGAACTATAAATATGGATAACCACGGCTGCCATCTTGACTCTGGTAAAA  
 ACATGATTATAAAGTCATTGGCGTATAATGTTTCAAATGACTATAGTCATCATGATATTGAA  
 TCAATTACGTTTGAGGAGACGTCACACCAATTGTTTCAAATTTATCTTATTGGAAGATTT  
 GACAAGAAACATGAACAAGCCTTGTGCACTGGATCTAAAGATGGGGACAAGACAATATGGCG  
 TAGACGCCAAAAGAGCCAAGCAACTGTCACAGCGTGCAAAGTGTTTAAAGACCACTTCTAGG  
 CGTTTAGGCGTTAGAATCTGCGGATTAAGGTTTGGAAACAAAGATTATTATATCACAAGAGA  
 TAAATACTTTGGTAGAAGGGTTAAGGTTGGTTGGCAATTTGCTAGGGTACTTGCACGTTTTT  
 TGTATGATGGTAAGACCATTGAAAGTTTAAATCAGGCAAATTCGAAGTTGATCAAGCAACTA  
 GATACTTTGTATTCTGAAATTTTTAATTTGAAAGGTTACAGGCTATATGGCGCGTCTTTATT  
 ACTAATGTACGATGGAGATGCTAATAAATCAAATTTCTAAAAGGAAAAAAGCTGCTAATGTTA  
 AAGTCAACTTGATCGATTTTGCACGTTGTGTTACTAAAGAAGATGCAATGGAATGTATGGAT  
 AAATTTTCGTATACCCCCAAAATCGCCAAATATAGAAGATAAAGGGTTCTTACGAGGTGTGAA  
 GAGCTTGAGGTTTTATCTGTTATTAATCTGGAATTATCTGACTTCTGATATGCCGTTAATTT  
 TCGATGAAGTAGAGATGAATGATATGATTAGCGAAGAAGCAGATTCGAATAGTTTTACCTCC  
 GCCACCGGTTGAAAATCAACTTCAACAGTAAGTGGGATTGGTTAGATGAATTTGACAAAAGA  
 AGACGAAGAAATGTATAATGATCCAAATAGTAACTAAGACAAAAATGGAGAAAATACGAGC  
 TTATTTTCGACGCTGAACCAAGATACAATGACGATGCTCAAGTTAGTGATTGA

>YMR189W 0.8Cold

ATGCTTAGGACAAGAGTACTGCTCTCCTTTGTAGGGCTACTGTGAGGTCAGGCAAGCACCAATTA  
 TGTTCATTAGCGAGGACTAGATCATTCCATTCTCAATCTATTTTGGCTCAAACAGCCGCTA  
 CAGACATAACGTCTACACAGTACAGCAGGATTTTCAATCCTGACTTGAAAAACATTGATAGA  
 CCGCTAGATACTTTTGTAGACGTCATTTAGTCTCTCCTAGCGACGTTAAGAAAATGTT  
 AAAACAATGGGTTATAGCGATTTAAACGCATTTATAGAAGAGCTCGTTCCTCCCAATATTT  
 TGAAGAGAAGACCCTTGAAACTAGAAGCTCCTAGTAAGGGATTCTGTGAACAAGAAATGCTT  
 CAACATCTAGAAAAGATTGCCAATAAGAACCCTATAAAGTTAAAAATTTTATAGGTAAGGG  
 TTAGTACGGTACGATTTTACCACCGGTTATACAAAGAAACCTGCTAGAAAAGTCCAGAATGGT  
 ATACTTCTTATACGCCCTATCAACCCGAAATTTCTCAAGGTAGGCTAGAAGCGCTATTAAC  
 TTTCAAACGGTTGTTTTCAGATTTGACTGGTTTGCCCTGTGGCGAACGCCCTCATTGTTGGATGA  
 GGGTACAGCGGCTGGAGAAGCTATGCTCTTGTCAATTAATTTCCAGAAAAAAGAACTAA  
 AATACGTAATAGATAAAAAATACACCAGCAAACAAAGAGTGTCTTACACCAGAGCCAAG  
 CCGTTCAATATTGAAATTATTGAAGTTGACTGTTCCGATATCAAGAAAGCTGTGGATGTTTT  
 AAAGAACCCCGACGTATCTGGTTGTTTGGTTCAATATCCAGCGACAGATGGTTCAATCTTAC  
 CGCTGACTCGATGAAACAGTTATCTGATGCGTTACACTCTCACAAGTCTTTGCTCTCTGTG  
 GCCTCAGATTTAATGGCTTTGACACTTCTAAAACCACCTGCTCATTACGGTGCTGATATCGT  
 CCTGGGTTCTCTCAACGATTTGGTGTCCCAATGGGTTATGGTGGTCTCATGCTGCTTTTT  
 TCGCTGTTATTGATAAATTAACAGAAAAATTCAGGTAGAATTGTCCGGTATCTCTAAAGAC  
 CGCTTAGGCAAGACGGCCTTGCGGTTGGCCCTCAAACAAGAGAACAACATATCAAGCGTGA  
 TAAGGCAACTTCAAATATATGTACCGCTCAAGCTTTACTGGCTAATGTTGCTTCGAGCTACT  
 GTGTTTATCACGGTCTTAAGGGCCTACAGAATATTTCCAGGAGGATATTTAGCTTAACATCA  
 ATATTGGCAAATGCCATCGAAAATGACAGTTGCCCTCACGAACTAATTAATAAAACATGGTT  
 TGATACTTTGACTATAAAGTTAGGTAATGGCATATCCTCCGAGCAGTTATTGGACAAGGCCT  
 TGAAAGAATTTAATATCAATTTGTTTGGCGTGGACACCACCTATTTCTTGGCTCTTGAT  
 GAAACAACACAAAAGCTGATGTTGAAAATCTACTAAAAGTGTTTGACATGAAAATCTTC  
 CGAGTTTCTTTCTGAGGACTATTTCAACAGTTTCCCAAGGGAATTTACGCGTACTGATGAAA

TATTGAGGAACGAAGTCTTTCACATGCACCATAGCGAAACAGCAATGTTGAGATATTTACAT  
 AGGTTGCAATCTCGTGATTTATCTCTTGCTAATTCTATGATTCCTTTAGGTTCCGTACTAT  
 GAAATTGAACAGTACTGTTGAAATGATGCCAATCACTTGGCCCAATTTTCGAATATCCATC  
 CGTCCAGCCATCAAACCAAGTCCAAGGATACAAGGAACATAACTTCTGTTGGAGAAAAGAT  
 TTATGCAGCATTACAGGTTTCGATGGTATTTCTTTACAACCAAATTCAGGTGCTCAAGGTGA  
 ATATACTGGTCTGAGAGTAATCAGATCCTACCTGGAAAGCAAAGGTGAAAATCATCGTAACG  
 TGTGTTTAATCCCTGTATCCGCTCATGGTACAAATCCGGCTTCTGCCGCTATGGCGGGTTTA  
 AAAGTTGTTCCCTGTCAACTGTTTGCAGGATGGCTCATTAGATCTGGTTGACTTAAAGAATAA  
 GGCTGAACAACATTTCTAAAGAACTAGCCGCCGTAATGATCACCTATCCTTCCACTTACGGTT  
 TATTTGAACCAGGCATCCAACATGCTATTGATATCGTACATTTCTTTTGGTGGACAAGTCTAT  
 TTGGATGGTGCTAATATGAATGCGCAGGTTGGGCTAACTTCACCCGGAGATCTTGGTGCAGA  
 TGTTTGCCACTTGAATTTACATAAGACATTTTCCATTCTCATGGTGGTGGTGGTCCAGCTG  
 GAGCTCCCATTTGCGTCAAATCTCATTAAATACCCATTTACCTAAACATGACGTTGTTGAT  
 ATGATCACTGGAATCGGCGGTAGCAAATCCATCGATTGGTCTCCTCTGCTCCATATGGTAA  
 TGCTTTAGTGTTACCAATTTCTTATGCCTATATCAAATGATGGGTAATGAGGGATTACCAT  
 TTTCTAGTGTGATAGCAATGCTAAATTCAAATTTATATGATGACAAGATTTAAAGATCATTAT  
 AAAATTTCTTTTCGTCAATGAAATGAGCACACTAAAACACTGCGCTCATGAATTTATAGTTGA  
 TCTAAGAGAATACAAAGCTAAAGGTGTTGAAGCTATCGATGTTGCCAAGAGATTGCAAGACT  
 ACGGATTCCATGCCCAACGTTGGCCTTCCCTGTTCCCGGAACCTTGGATGATAGAACCAACA  
 GAATCGGAAAACCTGGAAGAATTGGATAGATTCTGTGATGCCATGATATCCATCAAAGAAGA  
 AATAAATGCCTTAGTAGCAGGTC AACCAAAAGGACAGATTTTGAAAAATGCCCTCATTCAT  
 TGGAAGATCTTATTACTTCCCTCCAATTGGGATACGAGAGGTTATACCCGTGAAGAAGCCGCT  
 TACCCATTACCCTTTTTTGAGATACAATAAATTTCTGGCCTACTGTCGCTAGACTGGATGACAC  
 TTATGGTGACATGAATTTAATATGTACATGCCCTTCTGTAGAAGAAATTCGAACGAAACTG  
 AATGA

>YGR133W 0.78 Cold

ATGCCAAACTTCTGGATTCTTGAGAATCGTAGGAGCTATACGTCTGATACATGTATGTCGAG  
 GATCGTGAAGGAGTACAAAGTCATACTGAAAACATTGGCCAGTGATGACCCCATAGCGAACCC  
 CCTACCGGGGGATAATCGAGTCACTTAACCCGATTGACGAAACCGACTTGAGCAAGTGGGAA  
 GCTATAATTTCTGGGCCGTCAGACACACCTTATGAAAATCATCAGTTTTCGAATACTAATAGA  
 AGTCCCTAGTTCCCTACCCCATGAATCCACCAAAGATAAGTTTTATGCAGAACAATATTTTGC  
 ACTGCAATGTTAAATCAGCCACAGGAGAAATATGTCTGAACATCCTTAAACCAGAGGAGTGG  
 ACTCCTGTATGGGATTTGTTACACTGTGTTTCATGCTGTTTGGAGACTCCTAAGGGAACCCGT  
 TTGTGATTCTCCACTTGACGTAGACATTGGTAATATCATCCGCTGTGGCGATATGAGTGCCT  
 ATCAGGGGATTGTAAAGTACTTCCCTAGCAGAAAGAGAGCGGATCAACAACCATTGA

>YFL055W 0.79 Cold

ATGGCAGTCCTTAACTTGAAACGTGAAACTGTGACATTTGAAGAGACAGCGAAGAAAGATAT  
 CAAACCTTATTTTGCCTTCGAATGTTGAAGCGGTTGATATTTGATGAAGATCCCGATGTTTCAA  
 GATACGATCCCCAGACAGGAGTAAAAGGGCGCTCAAAAATAGGCATATCTCATTGCTAGCT  
 TTGGGTGGTGTATTGGCCCAGGTTGTCTTGTGGTGCAGGAAACGCACCTCAACAAAGGTGG  
 GCCACTTGCTTTACTTTTAGGCTTTAGTATTATTGGGATCATTGCTTTCTCAGTGATGGAAT  
 CTATAGGTGAAATGATCACTTTATATCCCTCGGGCGGTGGATTTACCACCTTTGGCTCGAAGA  
 TTTTCATAGCGATGCACTGCCTGCAGTTTGCAGTTTATGCTTACGTTGTTGTGTTCTTTCGCAGT  
 TTTGGCAAATGAGTACAACACTCTCTCCTCCATACTACAGTTTTGGGGCCACAAGTCCCTC  
 TATATGGTTACATCTTGATATCTGGTTTTGCATTTGAAATTTTTCAACTAGTTGGCGTTGGT  
 CTTTTTGGTGAACGGAGTACTGGCTTGCTTGTTGAAAATAGTAGGATTAGTAGCCTATTA  
 TATTTTCTCGATTGTTTACATATCTGGGGATATTAGGAATAGACCAGCTTTCGGCTTTCATT  
 ATTGGAATAGTCCAGGTGCATTATCACATGGGTTTAAAGGGAATTGCGATAGTGTGTTGTTT  
 TGTTCGACCTTCTATTCTGGAACGGAATCAGTTGCCTTGGCTGCAACGGAATCAAAAAACCC  
 TGGGAAGGCTGTGCCACTTGTGTTGCACAACTCTGTGGAGAATTTTAGTTGTTTATATTG  
 GAATTGCTGTTTTCTATGGAGCAACTGTTCCGTTTGCAGACCCAAACCTCTCTGCTTCTACC  
 AAAGTCTTAAATCTCCCATGCTATCGCCATATCTCGTGTGGTGGGCGGGCGGAGCTCA  
 TCTGGTTAATGCCTTCATTTTGATAACTTGCATCTCCGCCATTAATGGGTCACTTTATATAG  
 GGAGCAGAACCTTGACGCATTTAGCACATGAAGGCCTAGCTCCAAAAATCTGGCTTGGACC  
 GATCGAAGAGGCGTTCCCATCCCGCCATCACTGTTTTCAACGCCTTGGGCCTAATATCATT

GATGAATGTGAGCGTTGGAGCTGCAAATGCGTACTCTTATATATCGTTAATCTTTCTGGTGTG  
 GCGTCTTTATTGTCTGGGGTGAATAAGTTATACGCACCTGAGAATAAGGAAGGCGTGGGT  
 GCTCAAGGAAGATCCATAGAAGAGCTACCTTATGAAGCGTATTTTATCCGTGGACGCCAGT  
 ACTTAGTCTGGCCGCTAACATTTTTCTAGCACTCATCCAAGGATGGAGCTATTTTCGTACCTT  
 TTGATGCGGGCAATTTTTGTTGATGCTTATATCCTTCTGCCTGTTGGAATTTTATTGTATATT  
 GGCATATGTGTTTTAAGAGCAATCATTTTAGAACTGTTGATTTGCGGTCAATCAACCTAGA  
 CGAAGGACGAAGAAAAGACATGGAGGCTGATCTTTCTGATCAAGAGAGTAGCTTAGCATCTT  
 CGGAAACGATGAAGGATTATAAAAGTGCAACTTTTTTCAGATACCTCAGCAACATTTTCACC  
 TGA

>YOR353C 0.8 Cold

ATGGTAGCGACATCTTCAAAGAGGACGTTGGATCCGAAGGAGGAACATTTGCCTGCTGACAA  
 AACATCCACTAATTCAAGCAACACTATAATATCTGAGTTGGCAACACAAGAGAAATCCAGCT  
 CTAGTGGTACTACTAAAATTAATAGCTCTTAATATCAAGTCCATATCAGATGAAGATGTG  
 GGATATATCCAAAATGTTGAAAGACTGTCTTTAAGGAAAAATCACTAACATCCTTACCAGC  
 GAGTTTCAAGAGGTTATCAAGGCTGCAATATCTGGATTTGCATAATAACAATTTTAAAGAAA  
 TCCCATATATTTTGACACAATGCCCTCAATTAGAGATCTTGGATCTGTCTCCAATGAGATT  
 GAAGCATTGCCAGATGAAATATCATCGTTTTGGCAAGATAATATTCGTGTATTATCATTGAA  
 AGACAACAACGTTACTAGCATAACGTAATTTGAAATCGATCACAAAATTAACAAGCTGAGCA  
 TCTTGGATTTAGAGGATAATAAAATACCCAAAGAAGAGCTTGACCAAGTACAGAGTTATACT  
 CCATTTTCATACGGGCATCCCCAAAGAAGAATATTGGGCAATTGCGATATCACGATATCTAAA  
 AGATCATCCTAACCTACTACTCCAGAACCTAAAATATCTAGAGCAGCGAAAAGAATGGGAT  
 TCATAAATACGAACTTGTCTAATGGAGCAATGAATGAAAAAATATAATTTCACTTGCCCCA  
 AGTGCAAATACAACATAAGTGCATCTACTGCAATGGTCTCATCTAATCAAACCTCTGCAAC  
 ATCTTTTCAGTGGTACAGTCAATGCAGAATCAGAACAAAGTGGGGCAGTGAATGGTACGGAAC  
 TATACAATCACACCAAATATAATGACTACTTCAAGAGGTTGTCGATTTTACCAGAAGAGTCA  
 ATGAGTAACGGGCATCAAAAAATATCGCATGCAGAGTTGGTTGTTTTCTGTGCGAAGCTCCT  
 ATTTAGTTTTTACAGAATGCCAACAAAGCTATCAGAAAAATCGCCTCTTTCTGTAAAGAGAAGG  
 CCGTAGCGGTTAATGTAGTATCATTATTATACTCTGTGATCAGATCACATACTGATAATCTGGTG  
 GAGGTCTTGCAGCAAACAGAGAACGAAGACGAATCGCATGATCAGGCGTTAATCAAGCTGTG  
 CCTCACTATCATCACAAATTTTAAACAAATTATAACATTGTTGAGAAAAAATTTTGAGATTT  
 TTTTCAAAGAAGACGATCTATGCTTCATAAGGATGTTTTATATGACATTAATGTGTGCTTAT  
 ATGAAATGTATAATGCATGGTCTTTTATCAAAGAAGATGATCAAGTGTCCGGTTCTGCAAG  
 TAAGGCACCCAAGAAACATTCTTTTTCGAGGCACGAGACATCGTCCAGTAGTATCACAAAGCG  
 GTGGAGGACCCCGCAGCAAGTACGACCAGTACACATTGTAGCGGAAACATAAAATTACTGCCG  
 AAAACAAGGAGCACAAGAACACCATCTGCATCTGCATTGCTTTCAAATAGTAATATTCTGAC  
 GGGTGATAACCACTGCTGTTCTCTTTTATCACCAAATCTAAATGGTGCACACACCCATGGTC  
 CAATTTTGGGACACCAAATGCAATAAGCAATGGAAGTTCTCAAACGAACATGAATGAAGTA  
 AAACTACTAGCGATACTATTCCAAGGCAACAGCTGCTTCAGCACAATAAATCCATCAGCGA  
 TTCGAAAAAAGAGTACAGGCGCATGAACCTAACAGCATCCGGTTATGACTTCTTCAATAA  
 TTAACGCATCAAATAGTAATAACGCTCTCGAATGTTAATAATAACCCACCACCGATGAATGGT  
 GGTGGTGCCCGGAACAGTAGTGTAAATGTAGTGGAGACAAAATTTGACATTTCAACTGTATCA  
 AACGTTGTCCACAGTAGTTAAAATGGTGAGCGTTGTATATAACCAGTTAACTTACAGAGATAT  
 CCAAGATAGCCATTGCTAGCACCATGGGAAAGCAAATTTGACGGACTCGTAGCACCTAAA  
 ATTCGTGATTTGACGGAAACATGTCGTCAAGCGATGGATTTATCCAAACAATTTGAATGAAAG  
 GTTAAATGTATTAATACCGAACGATTCAAATTCAGAGAAGTATCTGACATCTTTGGAGAAGC  
 TGAAAACGTGGGAGATAATGAATTCGTTCTTAAAAGTAATAATATCAATTTCTGGCTAATACT  
 AAAATCGTAATGAGCGACGTGCCAATTTGAATGAGCTGAGACCTAACCTAGCCAACTTGGC  
 GAAGATTACCAAGGATGTCACTGTGATATTGGACTTGAGTTCATACAAGGCTGTATCAGTAA  
 GCGCCAACTCTCCGGAGTAA

>YBR169C 0.82 Cold

ATGAGCACTCCATTTGGCTTAGATTTAGGTAACAATAACTCAGTACTAGCAGTTGCCAGAAA  
 TAGGGGTATTGATGTCGTTGTCAATGAAGTTTCTAATAGGTCTACACCATCCTTGGTCCGGCT  
 TTGGCCCCAGAAATAGGTACTTAGGTGAATCTGGTAAAACTAAGCAAACATCGAATGTTAAA  
 AACACTGTGGAAAACCTTAAAAAGAAATCATTGGACTAAAGTTCAAAGACCTGAATTTGATAT  
 CGAGAATAAGTCTTCACTTCGAAATTGGTACAGCTAAAAAATGGTAAAGTTGGTGTGGAAG

TGGAGTTCGGCGGTAAAACACACGTATTTTCAGCTACTCAACTGACTGCTATGTTTCATTGAT  
AAGGTGAAGCACACCGTTCAAGAGGAAACGAAGTCATCAATTACCGATGTCTGCCTCGCAGT  
TCCTGTATGGTATTCGGAAGAACAACGTTATAACATAGCCGATGCTGCCAGAATTGCAGGAT  
TAAATCCTGTAAGGATTGTCAACGATGTGACTGCAGCCGCCGTTTCGTACGGCGTCTTCAAG  
AATGATCTGCCAGTCTGAAGAAAAGCCAAGAATCATTGGCTTAGTGGACATTGGGCATTC  
TACCTACACCTGTTCTATTATGGCTTTCCGCAAAGGCGAAATGAAAGTATTAGGTACTGCTT  
ATGACAAGCACTTTGGTGGTAGAGATTTGATCGCGCAATCACAGAACATTTTGCTGATCAG  
TTTAAGGACAAGTACAAGATTGACATTAGGAAAAATCCGAAAGCTTATAACAGAATTTTAAT  
CGCTGCTGAAAAATTAAAAAAGTGCTTTCTGCGAACACTACTGCCCCCTTCTCCGTTGAAT  
CTGTTATGGATGATATCGACGTTTCTCTCAATTGAGCCGTGAAGAGCTGGAAGAATTAGTA  
GAGCCCTTGTTGAAGCGTGTGACGTATCCAATCACCAATGCATTGGCTCAAGCTAAATTAAC  
TGTC AATGATATTGACTTCGTAGAAATAATTGGTGGTACAACCCGATCCAGTTTTAAAGA  
AGTCAATTTCTGATGTTTTTGGAAAACCTTTGTCTACTTTAAATCAAGACGAAGCTGTG  
GCCAAGGGGGCCGTTTCATATGTGCCATTCCTCTCCAACTTTAAGGGTCAGGCCGTTTAA  
ATTTGAAGATATTGATCCGTATTCAGTGTACATACACTTGGGATAAGCAGGTCGATGACGAAG  
ACCGTTTGGAAAGTATCCCTGCTAATTCATCATATCCATCAACTAACTAATTACTTTACAT  
CGTACTGGAGATTTGAGCATGAAAGCGGTGTACTCATCCTTCGAAACTGCCAAAAGGTAC  
TTCCACCCTATTGCAAAATGGAGCTTCACTGGGGTCAAGGTTCCCTAAAGATCAAGATTTTA  
TTCTGTAAAGGTC AAGTTAAGATGCGATCCTTCCGGCTTGCATATTATCGAGAACGCTTAC  
ACAACGGAAGATATTACGGTTCAAGAGCCAGTGCCTTTACCGGAAGACGCACCAGAAGATGC  
CGAGCCCCAGTTTTAAAGAAGTTACTAAAACAATTAAGAAAAGATGTGCTAGGTATGACTGCAA  
AAACATTCGCGCTAAACCCGGTTGAGTTGAACGATCTAATTGAAAAAGAGAATGAATTAAGA  
AACCAGGATAAGTTAGTTGCCGAAACCGAGGATCGCAAAAATGCCCTTGAAGAGTATATTTA  
TACCCTTCGTGCCAAACTCGATGATGAATACTCCGATTTTTCGCTCTGACGCAGAAAAAGAAA  
AGCTAAAAACATGTTAGCCACTACTGAAAAATGGTTATATGGTGATGGTGACGATTCTACC  
AAGGCAAAATACATTGCTAAATATGAGGAGCTGGCATCGTTGGGGAATATTATTAGAGGTAG  
ATATTTAGCAAAGGAGGAAGAAAAAGACAAGCACTCAGAGCGAATCAAGAACTTCTAAAA  
TGAATGATATTGCTGAAAAATGGCTGAGCAAAGAAGGGCACGCGCTGCAAGTGATGATAGC  
GATGACAACAATGATGAAAACATGGACCTTGATTAA

>YAR060C 0.8 Cold

ATGTCAAAAACCGATGTCAAAAATCTCGTGAGGCCTCCGGAATTTTGACGCTGCAAGTCAA  
TCTACGGGAAAGAAGAAATTTTAAACTTAATGCAAAAATAAGCTTTTTTCTTGAAAAATAA  
GATTTTCGGCAATAAAAGGTAAATGCAGCCAAAATCAAAATACTTCAGAAGAAGTCGTAGC  
GAGGACTGCTACGTGGAAGCGGATTTGAAGATCCTTTCCAGAACAAGAAGGAGCCGAAAGCT  
GCCAGGAACTGTTCCCTGATTTTTTAGGAAAACAATTAATAGGTATCTCGTCTAGCGTAGTAT  
CTCGAGTTTCCAGAAGTTGCAGATAA

>YIL075C 0.75 Cold

ATGCTTTTGACGACTGCTGCTCCTCTTTTAGCATTGTTGAGAGAGAATCAAGATTCTGTAA  
AACATATGCCCTAGAATCTATAAATAATGTTGTGGACCAATTATGGTCTGAGATCTCGAATG  
AACTGCCGGATATTGAGGCATTGTATGATGACGATACCTTTTCAGACCGTGAAATGGCTGCT  
TTGATTGCATCAAAGTTTATTACAATCTTGGTGAATACGAATCGGCTGTGAAGTATGCACT  
TGCCGCAAAGGATCGTTTTGATATAGACGAAAAGTCACAATTTGTTGAACTATAGTCTCAA  
AGAGTATTGAGATGTACGTCCAAGAGGCTTCCAAGCAATACACTAAGGACGAACAATTTTAC  
ACCAAGGATATTATTGACCCAAAATTAACCTCTATTTTTGAGCGAATGATAGAAAAATGTTT  
GAAAGCTTCAGAATTAATAATTAGCTTTAGGAATTGCCTTAGAAGGTTACAGATTGGATATCA  
TTGAAAGTGCTTTAAAGAGCAAATTTGGATCAGGATTCCACTTCTGAAAACGTTAAATTTATT  
AACTACTTATTGACCTTAGCTATAACTACTGTGACAAATCCAAGTTCAGATCCTCGATATT  
GAGAAAATCATTGATTTCCCTAATGAATATGCCTAACTGCGATTACTTAACGCTCAATAAAG  
TAGTTGTAAATTTGAATGACGCCGATTGGCACTTCAGCTATTTAAAAAATTAAGGAAGAG  
AACGATGAAGGATTATCTGCTCAAATTCGATTTGATTTGGTTTCGTCTGCGTCTCAGCAGTT  
GCTTGAGATTTTAGTAACCGAACTAACTGCCAGGGTTACGATCCTGCCTTATTGAATATTC  
TATCTGGGCTACCGACTTGTGATTATTACAATACCTTCTTTTGAATAATAAAAACATTTGAC  
ATCGGTCTTTTAAACAAGTCTAAATCATCTTTGGATGGGAAATTTTCTTTGTTCCACACCGC  
AGTCAGCGTTGCCAACGGTTTTATGCACGCTGGTACTACCGACAATTCATTTATCAAGGCCA  
ACTTGCCATGGTTAGGTAAGGCTCAAAATTTGGGCTAAATTTACAGCTACAGCCTCTTTAGTT

GTAATTCATAAAGGCAATTTATTGGAGGGTAAAAAAGTCATGGCCCCTTACTTGCCAGGCAG  
 TCGAGCTTCTTCTAGGTTTATCAAAGGTGGTTCATTGTATGGTTTGGGTTAATTTATGCTG  
 GCTTTGGTCGTGATACTGACTATCTGAAAAACATAATAGTTGAGAATAGCGGAACTTCA  
 GCGATGAAGACGTAGATGTATTGTTACATGGTGCTTCACTGGGTATCGGTCTTGCTGCTAT  
 GGGTCTGCTAATATTGAAGTTTATGAAGCCTTAAAGGAAGTTCTGTACAACGATTCTGCCA  
 CATCTGGAGAAGCAGCTGCATTAGGTATGGGTCTCTGTATGCTCGGAACAGGTAAGCCTGAA  
 GCGATTACGATATGTTTACATATTCCCAAGAAACGCAGCATGGCAATATTACTCGTGGTCT  
 AGCCGTTGGTTTAGCACTGATAAATTACGGCCGTCAAGAGTTAGCTGATGATTTAATTACTA  
 AGATGTTAGCAAGTGATGAGTCCCTGTTACGCTATGGAGGTGCATTACAATCGCGTTAGCG  
 TATGCGGGTACGGGAAATAATTCAGCTGTCAAGAGATTACTGCATGTGGCAGTCTCGGATTC  
 TAACGATGATGTCAGAAGGGCAGCAGTCATCGCATTAGGGTTTGTCTCTTGCCTGATTATA  
 CCACTGTACCAAGGATTGTCCAACCTTCTATCTAAATCGCATAACGCTCATGTCAGATGTGGT  
 ACCGCATTTGCTCTTGGGATTGCTTGTGCCGGCAAGGGTTTACAATCAGCTATTGACGTTTT  
 AGATCCGCTAACAAAGGACCCAGTAGATTTTGTTCGTGAGGCTGCCATGATAGCTTTATCCA  
 TGATTTTGATTCAACAAACAGAAAACTAAACCCTCAAGTTGCTGATATTAACAAAAATTTT  
 TTGAGCGTGATTACAAACAAACACCAAGAAGGTTTAGCCAAATTCGGTGCATGTGTGGCCCA  
 AGGTATAATGAATGCCGGTGGGCGTAATGTTACAATTCAGCTGGAAAAATGCGGATACAGGCA  
 CATTGGATACCAAGTCCGTAGTTGGTTTGGTCATGTTCTCACAATTCGGTACTGGTTCCCA  
 CTGGCTCACTTTTTATCCCTTCTTTTTACACCAACAACCTGTCATTGGTATTCGTGGTAGCGA  
 TCAAGCTATACCCAAATTTCAAATGAATTGTTACGCTAAAGAAGATGCATTCAGTTATCCGA  
 GGATGTATGAGGAAGCAAGTGGTAAGGAGGTAGAGAAGGTAGCAACAGCTGTTCTTTCCACG  
 ACAGCAAGAGCAAAAGCAAGGGCAAAGAAGACAAAGAAGGAAAAGGGTCCAAATGAGGAAGA  
 AAAAGAAAAAGAGCATGAGGAAAAAGAAAAAGAAAGAGAGACGAATAAAAAAGGCATAAAAG  
 AAACAAAAGAAAACGACGAAGAATTTTACAAAAATAAGTACTCTTCTAAACCTTATAAAGTC  
 GACAATATGACCCGTATACTACCACAACAATCGAGATATATTTCTTTTATTAAGGACGACAG  
 ATTTGTTCTGTACGTAAATTCAAAGGAAAATAACGGTGTGGTGGTTTTAAGAGATAGGGAAC  
 CCAAGGAACCTGTAGCACTAATTGAAACTGTTAGGCAAATGAAAGATGTTAACGCTCCACTT  
 CCAACCCCATTTAAGGTCGATGATAATGTCGACTTCCCTAGTGCTTAG

>YPL190C 0.81 Cold

ATGTCAGATGAAAACCATAACAGTGATGTTCAAGATATTCCTTCACCTGAACTATCCGTGCGA  
 TAGTAACTCTAACGAGAATGAATTGATGAATAACTCAAGCGCAGACGATGGAATCGAATTTG  
 ACGCCCCAGAGGAAGAAAGAGAAGCCGAAAGGGAGGAGGAAAATGAAGAACAACACGAACTG  
 GAAGATGTGAACGATGAAGAGGAGGAAGATAAGGAGGAAAAGGAGAGGAAAACGGGGAAGT  
 AATAAACACAGAAGAAGAAGAAGAAGAACAATCAACAAAAAGGCGGAAATGATGATGACG  
 ATGATGATAATGAAGAGGAAGAAGAGGAAGAAGAGGATGATGACGATGATGATGATGACGAC  
 GATGATGATGAAGAAGAAGAAGAAGAAGAAGAAGAAGGCAACGACAACAGTTCGGTAGG  
 CTCAGATAGTGCCGCTGAAGACGGTGAGGATGAGGAAGACAAAAAGGATAAAACCAAAGATA  
 AAGAGGTCGAACTTCGCCGTGAAACATTGGAAAAAGAACAAGGACGTAGATGAAGCTATA  
 AAAAAATAAATCTGTAAGAAAATGATAATACTCACTTTCCAATAATATGGAAAATGTTAA  
 TTACGATCTTTTACAAAAGCAAGTCAAGTACATTATGGACAGTAACATGCTAAATTTGCCTC  
 AGTTTCAACATTTACCTCAAGAAGAAAAGATGTCTGCGATTTTAGCAATGTTAAATTCAAAT  
 TCTGACACAGCTCTTCCGTACCTCCTCATGATAGTACTATCTCAACAACAGCTAGCGCCTC  
 AGCCACAAGCGGCGCAAGAAGCAATGATCAAAGAAAACCTCCATTGTCAGATGCCCAAAGAC  
 GTATGAGATTTCTTAGGGCGGATTTATCTAAGCCGATTACCGAAGAAGAACACGACCGTTAT  
 GCAGCCTATTTGCACGGTGAAAATAAAATCACCGAGATGCACAATATTCCTCCGAAGTCAAG  
 ATTATTCATTGGTAATTTGCCGCTAAAGAACGTTTCTAAGGAGGATTTATTTAGGATTTTCT  
 CTCCATACGGTCATATCATGCAAATCAATATCAAAAATGCCTTTGGATTCATTCAGTTTGAC  
 AACCCTCAAAGCGTTAGAGATGCAATTGAATGCGAGTCTCAAGAAATGAACCTTTGGCAAAAA  
 GTTGATCCTGGAAGTTTCTAGCTCGAATGCTCGTCTCAATTTGATCATGGTGATCACGGTA  
 CAAACAGTAGTCTACTTTTTATTTCTTCCGCAAAACGACCATTTCAAATGAATCTGGTGAC  
 ATGTACAATGACGACAATGGTGCCTGGCTACAAGAAATCCAGAAGACACACCGTTTCTTGCAA  
 CATTTTCGTTAAAAGAACCAGATCGTACGTATGCCATTGAGGTTTTCAACAGGTTTAGGG  
 ACGGGACTGGTTTGGAACTGATATGATTTTCTTGAACCAAGAATGGAACCTGGGAAAGCTT  
 ATCAATGATGCCGCATATAATGGGGTGTGGGGCTTGTTTTAGTTAATAAAACACACAATGT  
 AGATGTTCAAACCTTCTACAAAGGCTCACAAGGTGAAACGAAATTTGATGAATATATTAGCA  
 TATCCGCTGATGACGCAGTTGCCATTTTTAATAACATCAAAAACAACAGAAATAATTCCTCGT

CCTACTGATTACCGTGCTATGAGCCATCAGCAAAACATATATGGCGCTCCTCCTCTTCTGT  
 TCCAAACGGCCCAGCTGTTCGGACCTCCTCCTCAAACAAACTATTACCAGGGTTACAGTATGC  
 CTCTCCACAACAACAACAGCAACAGCCATATGGTAATTATGGGATGCCACCACCATCCCAT  
 GACCAAGGATATGGTTCTCAACCTCCAATTCCAATGAATCAGAGCTACGGTCGCTACCAGAC  
 TTCTATTCCACCACCACCTCCACAACAACAAATTCCTCAAGGGTATGGTCGTTATCAGGCTG  
 GTCCGCCTCCTCAACCACCTTCTCAAACCTCCAATGGACCAGCAACAACATATTATCTGCCATT  
 CAAAACCTTCCACCTAACGTTGTATCGAATTTGCTTTCAATGGCCCAACAACAGCAACAACA  
 ACCTCATGCTCAGCAGCAATTGGTTGGTTTAATACAATCAATGCAAGGCCAGGCTCCTCAAC  
 AACAGCAACAACAGTTGGGTGGATATTCCTCTATGAACTCATCCTCTCCCCCTCTATGAGT  
 ACCAATTACAATGGTCAAATATATCTGCAAAACCTCTGCCCCACCAATGTCACACCAACC  
 TCCGCCACCTCAACAACAACAACAACAACAACAGCAACAGCAACAGCAACAGCAACCTG  
 CTGGCAATAATGTTCAAAGTCTATTAGATAGTTTAGCAAAACTACAAAAATAG

>YMR309C 0.79 Cold

ATGTCCCGTTTCTTTTCGTCTAATTACGAATACGATGTAGCCAGTTCTTCATCCGAAGAAGA  
 TCTTTTATCTTCGTCTGAAGAAGATTTGTTAAGCTCTTCTCCTCTGAGTCTGAATTGGACC  
 AAGAATCTGACGACTCCTTTTTCAATGAAAAGTAAAAGTAAAAGTAAAAGTAAAAGTAAAAGT  
 GATGATTCTGATGCAAAGCCTTATGGTCTGACTGGTTCAAGAAATCTGAGTTCAGAAAACA  
 AGGTGGAGGTTCAAATAAATTTTTGAAAAGCTCTAACTATGATTCCAGTGATGAAGAATCCG  
 ATGAAGAAGATGGCAAGAAGGTAGTCAAGTCTGCCAAAAGAAAACTATTGGATGAAATGCAA  
 GACGTTTATAATAAGATCTCTCAAGCTGAGAACTCTGATGACTGGTTGACTATTTCTAATGA  
 GTTTGATTTGATCTCGCGTCTCTTAGTTAGGGCTCAACAACAAAACCTGGGGGACTCCAAATA  
 TTTTCATCAAGGTTGTTGCCCAAGTGGAGGACGCTGTGAATAATACACAACAAGCTGATTTG  
 AAGAATAAAGCTGTTGCAAGAGCTTATAACACTACAAAGCAAAGAGTCAAGAAAAGTTTCTAG  
 AGAAAATGAAGACTCAATGGCTAAATTCAGAAATGATCCTGAATCATTTGATAAGGAACCAA  
 CCGCAGATTTGGATATTTCTGCTAATGGATTCACAATTTCTTCGTCTCAAGGCAATGACCAA  
 GCGGTACAAGAAGATTTCTTCACTAGATTACAAACAATAATTGACTCAAGAGGTAAGAAGAC  
 TGTCATCAACAATCCTTGATTTCTACTTTGGAGGAGTTATTAAGTGTAGCTGAAAAACCAT  
 ATGAATTCATAATGGCTTATTTGACTTTGATTCCATCAAGATTCGATGCCCTCAGCTAACCTA  
 TCTTACCAACCAATGATCAATGGAAATCTTCATTCAACGATATTAGTAAATTTATTGCTAT  
 TTTAGACCAGACAATTGACACCTACCAAGTTAATGAATTTGCTGATCCAATCGATTTTCATTG  
 AAGATGAACCTAAAGAAGATTCTGATGGTGTCAAGAGGATTCTGGGTTCCATTTTCTCATT  
 GTTGAAGATTAGATGACGAATTCATGAAATCCCTGTTAAACATCGATCCTCATTCCAGTGA  
 TTATTTGATCCGTTTAAAGGGATGAACAATCAATCTATAAATTTGATCCTAAGAACTCAATGT  
 ACTTTGAAGCGACTTTGAAAGATGAACACGACCTAGAAAGAGCATTGACACGTCCATTCGTC  
 AAGAGATTGGATCATATCTACTATAAATCCGAAAATTTGATAAAAATTTATGGAAACTGCTGC  
 TTGGAATATCATACTGCTCAATTCAAATCTAAATTTACTTCAAAGACCAGCTCGATTCTG  
 CTGATTATGTCGACAATTTAATAGACGGATTATCGACAATCTTATCCAAGCAAACAACATT  
 GCTGTTCAAAAACGTGCTATTTTATACAACATTTACTACACTGCATTAACAACAAGATTTCCA  
 AACTGCTAAAGATATGTTACTAATTTCCAAGTTCAAACAATATCAACCAATTCGATTCAT  
 CCTACAAATTTTATTCAACAGGGTTGTTGTTCAATTGGGTCTATCCGCCTTTAAATTTATGT  
 TTGATTGAAGAATGTCATCAAAATTTGAATGATCTTCTGTCAAGTTCTCACTTAAGAGAAAT  
 TTTGGGCCAACAATCCCTACACAGAATATCTCTCAATTCTAGTAACAATGCTTCAGCTGATG  
 AGCGTGCTAGACAATGTTTGCCATATCACCACACATCAATCTCGATTTAATCGATGTCGTC  
 TTCTTAACATGTTTCCTTATTGATCGAAATTCAGAATGACTGCCTTCTATTCCGGTATTA  
 GGTCAAGAGAATTCCTTACTCTCCAAAATCCATTTCGTTCGTTCCCTTAGAACATTACGACAAGT  
 TAAGTTTCCAAGGTCCACCAGAACTTTAAGAGATTATGTCCTGTTTGGTGCCTTCAATG  
 CAAAAGGTAAGTGGAGAGACTCTGTTAAATACTTAAGAGAAATAAAAATCTTGGGCTTTATT  
 ACCAAACATGGAAACGGTGTGAAATAGTTTAAACGGAAAGAGTACAAGTTGAATCTTTGAAGA  
 CTTATTTCTTTTCTTTCAAGAGGTTCTATTCAAGTTTTTCTGTTGCTAAACTAGCCGAATTA  
 TTTGATCTTCCAGAAAATAAGGTGGTTGAAGTTTTGCAATCTGTTATCGCAGAATTGGAAAT  
 CCCAGCCAAATTAACGACGAGAAGACCATCTTTGTTGTCGAAAAGGGTATGAAATTTACTA  
 AATTGGAAGAAGCAATGGTAAAATTTGAACAAAGAATATAAAAATCGCTAAAGAACGTCTTAAC  
 CCACCATCAAAATCGTTCGTTGA

>YMR187C 0.75 Cold

ATGACCCACCTCATTTTTTTTTTATCTCTCATAAAAAAAGATGCATATGCTGGATATGTTT  
 GGAAGAATCCACATATGACTCTACATGGCTACAGCACACGTGCGGTTGCAACTTACAAATTC  
 ATAAACGCTGCTATATAAGATGGCTCTATCAAATGCATGTTGAACTTTTTCTTCCGAACACA  
 GTGGACCTACCAAAGGATGCTGATTTACCTATAATCACCTGTTTAAAAATGTCTCGTTGATGG  
 GCACCATGATTTTATGACGACTTCTCTCTTACAGAAATATGGGAAACTCGTCCCATTGGG  
 GCAAAAATCAGTACCGTTTCAAATGACTACGTGTTCAATCTAATGTCTCTTTATACCAA  
 CGGGATAATCATCCACCTTATGTGTTAGTGAAATTTGGCGAATGTCCTCAATGCAAGAAAAC  
 AAATTTCAAAAAAGACCTACAGTAACCATCCAGTCTTCTGTACTATCCCTGTTTTATCAGT  
 GGCAAAAAATTACACGATACGTGATACCATTAGGGATAACTAGTTTATTTCTTTTAAACCCT  
 GAAAAGACAAGTTTTGACATTGGATTATGGCAACTACGTGCCTTTTCCCTGAGAATGTTCT  
 ACGAAATATGTTAAACATCAGCACTACAAAGGCATTGGACGTATATGCGCAAACCTGAACGTG  
 GCTTATTAAGCATTCCTTTAACCTCCTCGATCATAATATATGGGTTACATATTATCTTAGC  
 AACATTTCTAACGTCAGTGCTAATGCAATACTCTTTAAGTGGGTGTATCTCAGTATTGTAAA  
 AACTGCTGGAAACAATATTACAAGGGTATAGGTTTACCTAAAATAATTTTGTATTCTAACT  
 TGGCTACATTTTGTCTATAATTTTACCTTTAAAAGATTGGTTGACTTAATTTACAGGAGGCTG  
 ATCAATAAAGGAGGTAAGTATTTGTATCACGGAAATTTTGAAAACCTTAGTAATAGCGTTCC  
 AGCTGAGGAATTTTTTATCAGGCGGAATTGGTATGCTATTTTGCAGAAAAGATACTATGGC  
 CCTTTGTTGGTAAATGTACAGGAGGTCTTCTATTGAATGCTTTTCTATGGATACAGAGAAAG  
 TTTAAAATTGAATGGACGCCGAATTGCTCCCTTCGGAATTTAGAATGATTTTCAATATTAT  
 AGGTTGTGGTACTGCTGCTATAGGCTGGTCAAGTCTGAAGCTCTATGCCAGTTACAAAAGAT  
 GTCAGGAACCTGAAAAGATCAATGAATTTATTGAACAAAAGTTGCAAAGGTGAGTAA

>YLR125W 0.78 Cold

ATGGGAGAAATTTTAGAACTAACTAATAAGAATTTTCATGAGCCACTTGAAAAAGGACATAAC  
 TTCGCAAGAATCCTTGAAAAGTAGAATTGAGGATAAAAAATGGTGATGTCGCTAGCCCCGAAAG  
 AGGATAACTATCCTCTATTGAATGAAACAGCGGCATGGCCAGATGGGGTGATTACCTCTGAA  
 GAAGGATGTTTCATCTTCAGGTGAGAAAGAGAATTCAGGCTTATGTTTCAGAAGAAAGTTTCAGA  
 AGAAGATCCAGAAGAAGCTGAAGAGGAATCTGCAAGGGCTTTTGGAGAGTTAGTTGCAGTCT  
 TGCGGGACAAAGACATAACCACTGAATGTATTGGACGAACCTCAGATGAAAGATTGGCTTGAA  
 AAATACACCGGTGTTTTATAGAAGCTCTTGGCATGGTTGA

>YPL003W 0.82 Cold

ATGGAAGATATGATAGACAGCTGAGACTATGGGGAGCATTGGGGCCAAGATAGTTTGAACCG  
 GTCCCGTGTGTGCGTGGTAGGACCTGCTACACCTTTGCTGCAGGAAGTTTTTAAAGAATCTGG  
 TGCTTGCCGGAATATCATCTCTTACTTGGCTCAAAGTAGAGTGTGCAGTTCAATCGGGTTCT  
 CTGTTTTTTAGCAGAGCTTAAAAAAGATCTTGAGCCATTGGCTTCTAAACAGCTAGAATATGA  
 GGAAAATGACCTTAGAAAGACGTTACAGCAACCTCAGTATGATTGGACCCGCTTCTCGGTGG  
 TGATCTTGACTTGTTATTGGTGAGCAAACCTGCGATGCTCGATTTAAATGAGATTAGGCGGCAG  
 AGAGGAACAAAGTTTCCGCCTGTTCTAAACACTTTTCGTCTCTGGATTTTATGGATATATATA  
 TCTGGTACTCTCAGAAACACATTTTGTTTTGAAGCACACCCAGATAGTAAGAAGTATGATT  
 TACGGTTACAGAACCCTTGGCCTGAACTAATAAATTACGTAGATACATTTGACCTAAGTAAA  
 ATGGATAACAGCCACGTTTTCTGGTATTCCATATACTGTTTTGCTCATGAAGTGTATTGCAAA  
 ACTTGAAAGGGATGGTAATAATGGGAGGATAACGATTGATCAGATGAAGAAAGTTTTAGACC  
 AAATTTGCCTTCCTTTAGGGAATGATGTTATCTACGAACCAATTATGTGGAAGCTAAACGC  
 TATGCTTACTTGGCCTGCTCTCAAATGATTGTTGTAAAGAACTGGAAGATCTGCTCCGAAA  
 TTTGGAAATATCAGATTATGGGAACGATTGGCATGATACTTATAACTACGAGATTCTCACAC  
 TATTATTGACTTTGAAAAATATTGCTAAAGAGAATGGGGAGCTCAGCTTCAACCTTTAACG  
 GGCACCTCCCAGATATGGAGTCAACAACGGAAAATTATATCAGACTCAAGAAACTGTATGA  
 AGTAAAAGCAAAGCTTGACAAGTCTCGTGTGGAGGAAAGTTGGCTCGCAGTAAAAAATAG  
 TTTACAGGATGTCTTGGAGACATTTTGTCTCATTACGGGGAGGTCAGGAAAATATTGCCG  
 CAAAAAGTGACTTGTTAGGTATTTTTAGCACCTCGAATGCCCTTTTAGATGCATTAGTTAT  
 GGTCCAATTCTGGGAGCAACCGGCAGTAACTGCAGAGGATAAAGATGAGTTTATTGGTTTAC  
 GAGTCGACGATAACTATTCCGTAATGGCCTTTTTTGGAGGTGCAGTGGTTCAAGAGGCTATA  
 AAGCTTATCACACACCATTACGTTCCCTATTGATAACCTATTTTTATATAATGGCATTATAA  
 TTCATCCGCAACATATAAAATATAA

>YDR028C 0.65 Cold

ATGTCAACAAATCTAGCAAATTACTTCGCCGGTAAGAAAGATATTGAAAACGAGCATGTAAA  
 TAGAAATGCGAGCCATGAAAGTAATAGCAAAAAGTGATGTCAAATTAGTGGTAACGATAACG  
 ACAACGACGAAGATATGGGGCCTTCAGTATCGATGGCTGTTCAAGCGAAAAATGATGATGAT  
 TTCCATAAATCAACTTTCAACCTTAAAAGAACAAGATCAATGGGCCTTCTTGATGAATATAT  
 TGACCCTACCAAGAAATTGCTAGGAAGGTCAGACGACTTATATGATAACGACAATGAATATT  
 ATGACAACCTCATCTAATAATTTCTCAAGCAATTTCTCAGATGATGATTATGATGACGGCTAT  
 CAGGAACACTCAACCTCCGTTTCTCCACCGCCGGCGGATAATGATAGCTACTTAATTCCACA  
 AGATGATAATGACGTAGTGGTAGAGCCAGAAAGACATGTTGACTATCTGTCACATGAATGGA  
 AAGAATCAGAAATTTCTAATTTCTTGAAATATATCATCTAAAGAAAAAGAAAAGAGATGTT  
 GATCTAGTAAATGCTGCTAGGTTAGAAAATGCCTCATGGAGAACATGGGCAAAAGCAAGAAA  
 CAACTTGAAAACAGTGTACCTGAAGTGGTTAATTGGTCAAAGATTCTGATGTGACTTGGC  
 TATATGGCCCTATTGTAAGAGATTCTGAAGGTAATGCCCAAAGTGAAGAAGAACATGATCTA  
 GAAAGAGGATATGGTTCCGATGATGAAAATTTCCAAGAGAAATTTCAATGCCCACTAAAAATTC  
 AAAGTCGATCGCAGCTGCTCCGAAACCAATTTTGAAGAAGAGAACCGTCCAGAAAATTATAG  
 AGGACAACGCTTTATGGAACTGAATGAGGCAAGAAAACACATGACAGAAATGAAACATGCT  
 TCGGTAATAATGGATCCCAATGGCAACAAAAACGTCCATGACGATTTTCGATGCTCTGGCCGC  
 TCAAGTTAACGCCCAGTACTACCATTATCCCAAAGAATCGAACAGTAGCGTTAGTTTTGAAGA  
 GTCAACACTCTGACAAAAAAGATAATTCTACCATACCGAATCCTGTAGGAGAAAATTTCAAAT  
 GGTGGCGGTGACAAGGGAGAAGAAGACCTGCATTTAAAGTCAGCGCTTCATGTTCAAAAACAA  
 TAGGTCAACGGCACAATCAAAACAAAGCATACTAGAAAATAGTACCAATGATCGTAAGGCTA  
 ACTTGGATCAAAACCTAAATTTCTCCTGATAATAATAGGTTCCCTCCTCAACATCTTCTCTCC  
 AATAGAGATAATGAAAACAATTCATGGGATTATCATCAATATTAACCTCAAACCCAAAGTGA  
 AAAATCTAACAAACCTACTAAAAATAGACATATACATTTTAAATGACAGGGTGGAAACAATGTA  
 TGGCACTACGATATCCAGCTTCACAATCGGAGGATGATGAAAGCGATGATGAAAATAAACAA  
 TATGTTGATGTTAATAACAATGCGAACGTTACAACAATAAACAAACAATAGGACTCCATTGCT  
 AGCCATTCAGCATAAATCTATTCCTATCAACTCCGCAACTGAACATTTGAACAAAAATACTA  
 GCGACGATGATACATCCTCACAATCATCATCTTCATCACATTTCTGATGATGAAGAACACGGC  
 GGCTTTTACATAAATGCAAGATTTTCCAGGAGGTCTGACTCTGGAGTTCATTCACCAATAAC  
 AGATAATTCCTCTGTGGCTTCATCTACTACTTCCAGAGCTCATGTACGTCCTATAATAAAGT  
 TGCTTCCTGATACCCTTTGAATTTATGGATCAGACGAAGAATCTGATAATGGCGAATTTAAT  
 GGGTATGGTAATGCTGTGTACATAACGTCAATACCTCCAGAGGCTATGATTACATATACGA  
 TTATAACTCGGTCTACACTGGTGATACTTCCAGTTTTTTTACCAGTAGATTTCATGTGACATTG  
 TAGATGTTTCTGAAGGAATGGACTTACAAACAGCCATTGCAGATGATAATGCATCAAACATAT  
 GAATTTAACAAATGCGGTAGAATCCAAGGAAAAACATGTTCCACAACCTACACAAAGCTTCAGC  
 AAATAATACAACACGTCAACATGGATCGCATATGTTATTATATGACGACGACAATTACAGCT  
 CTTTCATCAGATAGCGAACAGCAATTTATTGAAGACTCACAATACAATAGTAGCGACGACGAA  
 GAGGAAGAAGATGACGATGACCAAGAAGTAGACGATAACCACGATGAAGGACTTTTACTGAG  
 GAGAACATTGTCACTTGGGAAATCAGGATCTACCAATTTCTTGTACGATCTAGCACAAACAT  
 CACTCTCTTCGGCAACTCCTCAACAAAAAATCCTACTAATTTTACAGGGGGTAAACTGAT  
 GTAGACAAAGATGCACAACCTGGCTGTGAGGCCGTATCCGTTGAAGCGCAATTCCTCTTCAGG  
 GAACTTCATATTTCAATTCAGATAGTGAAGAAGAGAGTAGCAGCGAGGAGGAACAAAGACCAT  
 TACCCGCTAACAGTCAGCTGGTTAATCGAAGCGTATTGAAAGGCAGTGTGACACCAGCAAAC  
 ATATCATCTCAGAAGAAAAAGCCCTTCCAAAGCAGCCAAAAGCGTCCGATAGTTTCACAAAG  
 CTTTGAATTTGTAATAATACTCCTTACCAGCCGAAGTGGGGCGAGTGATGTTGCCATAG  
 AGGTTATTTCTCTCCTAGAAATGAATCTATCAAGTCTGTTGTTTTCCGGGGGAAATATGATG  
 GACCATCAAGATCACTCAGAAATGGACACTTTGGCAAAAGGATTTGAAAACCTGCCATATAAA  
 TAATGCTAGTAAGCTAAAGGACAAGAAAGTTGATAGCGTGCAAACCACTAGAAAAGAAGCGT  
 CTTTGACGGATTGAGTAATGAAAGCTTACACAAAGTGGTGCAGAATGCAAGAGGTATGGCA  
 AGCAAGTACTTGCACCTTTGGAAAAAGAGTGACGTCAAGCCACAAGAAAATGGAATGACAG  
 CAGTTAG

>YJL002C 0.82 Cold

ATGAGGCAGGTTTGGTCTCTTGGATTGTGGGATTGTTCCCTATGTTTTTTTCAACGTGCTTTC  
 TGCTGCCCAATACGAGCCACCTGCGACTTGGGAGAATGTTGATTATAAGAGGACAATAGACG  
 TGTCAAACGCTTATATTTTCAAGAAACAATCGAAATAACTATCAAAAACATAGCAAGCGAACCT  
 GCGACTGAATACTTACAGCCTTTGAGAGTGGCATCTTCAGTAAAGTTTCTTTTTTTTTCAGC  
 CTATTTTACCAACGAGGCAACTTTTTTAAATAGCCAATTACTTGCCAATTCGACTACAGCAC



CTGGTGACGATGGTGAAAGTGAAATTAGATACGGGATCATTCAATTTCCAAATGCAATTTCC  
 CCTCAGGAAGAAGTTTCTTTAGTGATTAAGAGCTTCTATAATACCGTAGGTATTCCCTATCC  
 TGAGCACGTTGGAATGTCAGAAGAACAACACCTATTGTGGGAAACGAACAGATTGCCGCTTT  
 CTGCTTACGATACCAAGAAGGCCCTTTTTACGCTGATTGGTAGCTCATCATTTGAGGAGTAC  
 CACCCCCAAATGACGAGAGTTTACTGGGAAAAGCTAATGGAAACTCTTTGAGTTTGGGCC  
 TTGGGAAGATATCCGAGATTTTCTTCAAACGAAACCTTAGCAATTGTTTATCCACAATG  
 CCCATTGAATCAGGTAGTGAATTTGAGAAGAGATATTTGGCTTTCTCATTTGGGCTTCCACA  
 ATACAATTTGAGGAATATTATGAATTAACAAACAAAGCCGAAAACCTGTCTAAAGGATTTTC  
 AAGATTAGAATTAATGAAACAGATTCAAACCTCAGAATATGAGACAAACCTCACTTTGTTACTG  
 TCTTAGACATGCTCCTGCCTGAGGGAGCTACTGATCATTATTTCACTGATTTGGTTGGCCTT  
 GTTCCACGTCGCATGCAGAACGTGACCATTTCTTTATAAGACCAAGATTCCCAATCTTTGG  
 AGGTTGGAACACAATTTTACTGTCGGTTGGACTAATAAAATTTGTCCGATTTCTTGCATGTAT  
 CCTCTGGCTCAGACGAGAAATTCGTTGCTTCTATCCCAATTTCTAAACGGCCACCAGGACT  
 GTATATGATAATGTTGAATTAATCGGTATTTCTTCCGGAAGGGGCCGAAATATTCGATATTGA  
 TTCTCCAGTCCCTTTTACAAATGTTTCTATAGAAACCCAGAAATCATACTTTGACCTAAATA  
 AAGGTCACGTTAAATTAACCTTTCAGTTACAGAAATTTGATTAGTCAAGTTGCCAATGGCCAA  
 GTCTTGATAAAGTACGACTACCCGAAAAGCTCTTTTTTCAAGAAGCCTCTGTCTATTGCTTG  
 CTATATTTTACCACCTAATGGGAGTTTTTGTCTTAAAAACTTTGAACATGAACGTAACATA  
 ACTGA

>YJL009W 0.77 Cold

ATGATACAGCCTAGCAAGTTTGAAAACCTTGATTGCAATTTATGACATTATATTCTGCTGTTTT  
 GCAGGTATATCTACTTTTGTAAGTATAAAGATGCAAACAAATCAGTCTTCTTGGTCCCAGTTA  
 CCTGGCCTTGGGCCCTTGAGGTGCTCTTGGACCACCCGCTTCTTTGCCATGATAATTTGGTC  
 AATGGAAAGCACAGTAGTTGCAGCTTCTGTAGCGACGTTAATAGCAAACCTTTTTCGTTGCAA  
 GCATGTCATAAATATTTTCTCTCTGATGTCTTTTACACCTTCATCAGATTCGCCATCAATA  
 TCCACACCTTTATATAA

>YOL137W 0.78 Cold

ATGGATGCTTCCCTCGGTTCCACCAAAGGTAGATGATTATGGAATGTATACAACCTGAAATTTCC  
 ACATCATAACCCAATAGAGTTGAAAAATCTGCTATCATCATCAGACTCCAGAAGAAATTTCTC  
 AAGATGAAGATAGTCTACCTAACAAATACAAACTTAATCAAAGAAATTGACTGGCAGGGCGAG  
 AAAGTTAAACATATCCACTAAACTATCAAACCTGTACCACTAGTAAAGCTGCAGGTGATAGC  
 ATGCTTGATTATGTTTCGTAGTCTTTGGTATGAACGATCAAACAGTAGGTGCACTACTTCCCTA  
 CGCTAATTGAATACTATCATATATCGCGGGTAGATGTCTCAAACGTATTTATAGTCCAATTA  
 TGTGTTTATGTGATGGCGTCTTTATCAAAGAGAGATTGAATAAGCACTTTGGTATGAGAGG  
 TGGTATGCTTCTAGCAGCTGGTTTGTGTATAGTATTTCTTATCATTTTAGCAACTGCACCTT  
 CTAGTTTCTATGTTTGTATGTTTGTGGCCTTCCCTCTTGGTTTGGGATCGGCATCTTAGAT  
 TCTACCGGTAATGTTTTAATGGGCAGTCTTTTAGTCCATAAGAATGAACTCATGGGTATCAT  
 GCATGGTCTTTACGGGCAGCAGCTATGGTTACTCCTCCCTTAGTTTCATATTTTGTGTAAT  
 GGGTTCATTGGTCTTTTTTTTCCCTTATTCCCTCTGTTCTTTTCTATAATAGGCATGATTGTA  
 ATCTTCCCAGCTTTTAAATTTGAAACTGCAAGTAAATACGACTACCTCTGCTCTGTGGAAAA  
 CAAAGAAAGCAACAATGATGTGGAAGAAGCGGGTGATAACTCGCTGATGGAATCTACCAAGG  
 CGAGCCCAGGATTTTTTGAACCTTTAAGAAATCCTGCTATTTTCTTGTACTCATTGTATTTG  
 TTCTTTTACTTAGGTGCTGAAATTACAACCTGGTTCATGGTCTTTTAGTTATTTATTGGAAAC  
 TAAATCAAGTAATAAGGTTGCTATGTCATACATAGCGGCATCGTTTTGGACAGGTTTGACTG  
 TAGGCAGGTTGTGTCTAGGATTTGTTACTGAAAGATTCTTCGAAAACGAGTATAAAGCAAGC  
 AAAGCGTACGCTTTTTTAACTCTATCTTCATACACCTTATTTGTGCTTGTGGGTTGATCAA  
 TTCAAGCTCAGTTTTTCTATTTCTGTCGTGTTATTTTTTGTGTTTTTTGTTGTGGTACGTTTA  
 TCGGACCATTATCCCAAACGCAAGTATAGTTGCATTACAAGTATTGCCAAAAGACTACAT  
 GTGAGCGGGGTTGGGTTGCCGTCGCCGTTGGTGGTTGTGGTGGTGCAGCCATTCCATATTT  
 GGCTGGAGTTATTGCACACACAGTGGGAATCCAGTATATCCCACTATTGTGTTGGATTATGG  
 TTGCGTTATTTACATTGGAATGGACATTGTATCCTAAATTCATAAAAAGGGCATGAAGAATAT  
 TTTTAG

>YBL022C 0.81 Cold

ATGCTAAGAACAAGAACCACAAAGACCCTTAGCACAGTGGCGAGGACCACAAGAGCTATCCA  
ATATTACCGATCTATCGCTAAGACTGCTGCAGTTTCTCAAAGAAGGTTTCGCATCGACCTTGA  
CCGTGCGTGACGTAGAGAATATCAAACCTAGCCATATTATTAAGAGTCCAACATGGCAAGAG  
TTCCAGCATCAATTGAAGGATCCAAGGTACATGGAACACTTTGCACAACCTTGATGCACAGTT  
TGCTCGGCATTTTCATGGCTACAAACAGCGGCAAAAGTATTTCTGGCGAAAGATGATAGTACAT  
CTCAGAAAAAGGATGAAGATGTCAAGATAGTACCTGATGAAAAAGATACAGACAATGATGTT  
GAGCCCACGCGAGATGATGAAATTTGTTAATAAGGACCAAGAAGGTGAAGCTTCGAAAAACTC  
CAGAAGCTCCGCTTCTGGAGGTGGACAGTCATCATCCAGTCGATCGGATTTCTGGAGATGGAA  
GTTTCGAAACAAAAGCCTCCAAAGGATGTACCAGAAGTATACCCGCAAATGCTAGCATTACCA  
ATAGCCAGACGGCCCTTATTTCCAGGGTTCTACAAGGCGGTTGTGATATCGGACGAAAAGAT  
TATGAAGGCAATCAAGGAAATGTTAGACCGCCAGCAACCCTACATTGGCGCTTTCATGTTGA  
AGAACTCGGAAGAAGATACTGATGTAATCACAGATAAAAAATGATGTATACGATGTTGGTGT  
CTGGCTCAAATAACTAGCGCTTTCGGAGTAAAGACGAAAAGACGGGCACGAAACAATGAC  
TGCTCTTTTATATCCTCACAGGAGAATAAAAAATGATGAATTTATTTCCACCAAACGAGGAAA  
AGGAAAAATCAAAGAACAAGCAAAGGATACGGATACTGAAACGACCGTCGTTGAAGACGCT  
AACAAACCAGAAAGACCAAGAAAGCACCAGCCCTGCTACGCCTAAGTTGGAGGATATTGTGGT  
GGAGAGGATACCAGACTCAGAATTGCAACATCATAAGAGAGTAGAAGCCACTGAAGAAGAGT  
CTGAAGAATTAGACGATATTCAAGAAGGTGAGGACATTAACCCACAGAATTCTTAAAAAAT  
TATAATGTTTCCCTTGTCAATGTGTTGAATTTAGAAGATGAACCGTTTGATAGAAAGTCACC  
CGTTATTAATGCGCTAACATCAGAAATATTGAAGGTATTTAAAGAAATTTCTCAATTGAACA  
CGATGTTTCAGAGAACAATTTGCAACTTTTTCTGCTTCAATTCAATCTGCGACCACGAACATT  
TTTGAGGAACCAGCTAGATTGGCAGATTTTGCCGCTGCTGTTTCTGCCGGCGAAGAAGACGA  
ATTACAAGACATACTGTCATCTTTAAACATTGAGCACAGACTAGAAAAGTCGCTACTAGTCC  
TTAAGAAAGAATTGATGAATGCCGAATTACAGAACAAAATCTCCAAAGATGTAGAGACAAAG  
ATTCAAAAGAGACAAAGAGAATACTATTTGATGGAACAATTAAGGGCATCAAAGAGAATT  
AGGTATTGACGACGGCCGTGACAAATTGATTGACACTTATAAAGAAAAGAATCAAGTCATTAA  
AATTGCCTGATAGCGTTCAA AAAAATTTTCGATGATGAGATAACTAAATTAAGTACCTTGGAG  
ACTTCTATGTCCGAATTTGGCGTTATCAGAACTATTTGGATTGGTTAACATCGATCCCATG  
GGGAAAACATTCCAAAGAACAGTATTTCCATTCCGAGAGCAAAGAAAATTTTAGATGAAGATC  
ATTATGGTATGGTAGATGTCAAGGATCGTATCTTGGAGTTTATTGCCGTCGGTAAACTATTG  
GGTAAAGTCGATGGTAAATCATATGTTTCGTAGGACCCCCAGGTGTTGGTAAACGTCAT  
AGGTAAATCTATCGCTAGAGCTCTTAACAGGAAATTTCTCCGATTTTCTGTAGGCGGTATGA  
CGGACGTGGCAGAAATAAAAGGTCATAGGAGAACGTATATTGGTGCCTTACCTGGCAGAGTA  
GTTCAAGCATTAAAGAAGTGCCAAACTCAAATCCTTTGATTTTGATAGATGAAATCGATAA  
GATTGGACACGGCGGCATACACGGCGATCCGTCCGCGGCATTGTTAGAAGTATTGGACCCTG  
AACAAAACAACAGCTTCTTGGATAACTACTTGGATATTCCTATTGACTTATCAAAGTGCTT  
TTCGTTTGCCTGCTAACTCTTTGGAAACTATTTCCAAGACCTTTACTGGATCGTATGGAAGT  
CATTGAGTTGACAGGATATGTTGCTGAAGACAAGGTTAAGATTGCCGAGCAGTATTTAGTTC  
CAAGTGCCAAGAAAAGCGCTGGTCTAGAAAACCTCATGTTGATATGACAGAAGATGCAATA  
ACAGCGTTAATGAAGTACTACTGTAGAGAAAGTGGTGTAAAGGAATTTGAAAAAACACATCGA  
GAAAATATACCGTAAAGCAGCCCTACAAGTGGTAAAGAAGTTGAGTATTGAAGATTTCCCAA  
CGTCATCAGCCGACAGCAAGCCTAAAGAAAGCGTTTCTTCCGAAGAAAAGGCGGAAAATAAC  
GCCAAAAGCTCATCGGAGAAGACTAAGGACAATAATTCGAAAAGACAAGCGATGACATTGA  
AGCCTTAAAGACCTCTGAAAAGATCAATGTTTCCATATCCAGAAAACCTAAAAGATTACG  
TTGGGCCTCCAGTCTACACTACAGACCGGTTATACGAAACAACCTCACCAGGGGTAGTTATG  
GGGTGGCGTGGACTAATATGGGAGGTTGCTCACTTTATGTAGAATCTGTCCTTGAACAACC  
TTTACACAACCTGCAAGCATCCAACATTTGAAAGGACCGGGCAACTGGGAGATGTTATGAAGG  
AATCATCAAGGCTTGCTTATTCATTCGCCAAGATGTATTTAGCACAAAAATTTCCCTGAGAAC  
AGATTTTTTGAAGGCGTCTATCCACTTGCATTGTCTTGAAGGTGCTACCCCTAAAGATGG  
TCCATCTGCAGGTGTCATATGGCCACTTCCCTTCCCTTAGCATTGAATAAGTCGATTG  
ACCCAACGGTTGCGATGACCGGTGAATTGACACTTACCGGTAAAGTTTTACGTATCGGTGGG  
TTGAGAGAAAAAGCTGTGGCCGCTAAAAGATCTGGTGCCAAGACTATTAATTTCCCTAAAGA  
TAACTTAAATGATTGGGAGGAACCTCCAGACAATGTAAAGGAAGGTTGGAACCTTTAGCTG  
CTGATTGGTATAATGATATATCCAAAAATTAATCAAGGATGTGAATACGAAAGAAGGTAAT  
TCAGTATGGAAGGCTGAATTTGAGATTTTGATGCTAAAAAGGAAAAGGACTAA

>YPL151C 0.79 Cold

ATGGACGGAAATGATCACAAAGTCGAAAATTTAGGAGATGTAGACAAATTTTATTCCAGAAT  
 ACGCTGGAATAACCAATTTTCATATATGGCCACTCTGCCGCCACCTACAAAGCGAAATGG  
 AAGGTCAGAAATCATTGCTAATGCGATATGATACTTATAGGAAGGAAAGTTCTTCTTTTAGT  
 GGTGAAGGCAAGAAAGTTACTCTGCAGCATGTTCCCTACAGATTTTTTCAGAAGCATCACAAAGC  
 AGTGATTAGCAAGAAAGATCACGATACGCATGCATCTGCTTTTGTGAATAAAATTTTCCAAC  
 CAGAGGTTGCTGAAGAACTTATAGTTAATCGATACGAAAACTTCTGTACAAAGGCCGGAA  
 TGGCATGCACCTGGAAACTTTCACGCGTTATCAATGGCCATCTTGATGGGTACGATGCGT  
 TGCAATCGATCCTGTTGACAACGAATGGTTCATCACCGGAAGTAATGATACGACAATGAAAG  
 TTTGGGATCTTGCAACAGGAAAATTA AAAACTACCTTAGCAGGGCATGTAATGACAGTGAGA  
 GACGTTGCTGTGTCAGATCGACATCCTTATTTATTTTCTGTTAGTGAAGATAAGACGGTCAA  
 ATGCTGGGACCTAGAGAAAAACCAATTATTAGAGATTACTATGGACATTTATCGGGGGTTC  
 GTACGGTGAGCATAACCAACGCTGGATCTCATAGCTACCGCAGGCCGAGATAGCGTTATC  
 AAACCTCTGGGATATGAGAACCAGAATACCTGTTATTACACTAGTTGGGCATAAGGGTCCAAT  
 CAATCAAGTACAGTGTACTCCAGTAGACCTCAAGTGGTGAGTTCATCGACTGATGCTACGG  
 TAAGGTTATGGGATGTAGTTGCTGGGAAAAACAATGAAAGTCTAACACATCATAAGAGGTCT  
 GTGAGAGCTACAGCGTTGCATCCTAAGGAGTTTTCGGTGGCTTCTGCGTGTACTGATGACAT  
 CAGATCATGGGGATTAGCAGAGGGGTCTTTACTCACCAATTTTGAGTCTGAAAAGACAGGCA  
 TAATCAATACTTTAAGCATTAATCAAGATGATGTATTATTCGCTGGCGGTGACAATGGTGTG  
 CTTTCTTTTATGATTATAAGTCTGGTCACAAATACCAATCGTTGGCCACGAGAGAAATGGT  
 AGGCTCTCTGGAAGGTGAACGGAGTGTCTTTGTAGCACTTTCGATAAAAACAGGTTTAAGAT  
 TAATCACTGGAGAAGCAGACAAAAGCATAAAAGATTTGGAAACAGGATGAGACGGCTACAAA  
 GAGTCAGAACCGGGGCTAGCGTGAACCCCACTTAAGCGCCAAAAGATTTTAG

>YOR388C 0.78 Cold

ATGTCGAAGGGAAAGGTTTTGCTGGTTCTTTACGAAGGTGGTAAGCATGCTGAAGAGCAGGA  
 AAAGTTATTGGGGTGTATTGAAAATGAACTTGGTATCAGAAATTTTCATTGAAGAACAGGGAT  
 ACGAGTTGGTTACTACCATTGACAAGGACCTGAGCCAACCTCAACGGTAGACAGGGAGTTG  
 AAAGACGCTGAAATTTGTCATTACTACGCCCTTTTTCCCGCTACATCTCGAGAAACAGGAT  
 TGCAGAAGCTCCTAACCTGAAGCTCTGTGTAACCGCTGGCGTCGGTTCAGACCATGTCGATT  
 TAGAAGCTGCAAATGAACGGAAAATCACGGTCACCGAAGTTACTGGTTCTAACGTCGTTTCT  
 GTCGAGAGCACGTTATGGCCACAATTTTGGTTTTGATAAGAACTATAATGGTGGTCATCA  
 ACAAGCAATTAATGGTGAGTGGGATATTGCCGGCGTGGCTAAAAATGAGTATGATCTGGAAG  
 ACAAATAATTTCAACGGTAGGTGCCGGTAGAATTGGATATAGGGTTCGGAAGATTGGTTC  
 GCATTTAATCCGAAGAAGTTACTGTACTACGACTACCAGGAACCTGCGGAAGCAATCAA  
 TAGATTTGAACGAGGCCAGCAAGCTTTTCAATGGCAGAGGTGATATTGTTTCAGAGAGTAGAGA  
 AATTGGAGGATATGGTTGCTCAGTCAGATGTTGTTACCATCAACTGTCCATTGCACAAGGAC  
 TCAAGGGGTTTTATTCAATAAAAAGCTTATTTCCACATGAAAGATGGTGCATACTTGGTGAA  
 TACCGCTAGAGGTGCTATTTGTGTCGAGAAGATGTTGCCGAGGCAGTCAAGTCTGGTAAAT  
 TGGCTGGCTATGGTGGTGTGCTGGGATAAGCAACCAGCACCAAAGACCATCCCTGGAGG  
 ACTATGGACAATAAGGACCACGTGGGAAACGCAATGACTGTTTCATATCAGTGGCACATCTCT  
 GGATGCTCAAAAGAGGTACGCTCAGGGAGTAAAGAACATCCTAAATAGTTACTTTTCCAAA  
 AGTTTGATTACCGTCCACAGGATATTATTGTGCAGAATGGTTCCTTATGCCACCAGAGCTTAT  
 GGACAGAAGAAATAA

>YGL252C 0.78 Cold

ATGTCAACACTTAGCGATAGTGATACCGAGACTGAGGTCGTGTCGAGAACTTGTGTGGAAT  
 CGTCGACATAGGTTCTAATGGTATTCGTTTTAGTATATCTTCCAAGGCTGCACATCATGCAA  
 GAATTATGCCTTGTGTTTTTAAAGATAGGGTGGTCTTTCTCTATACGAAGTTCAATATAAT  
 ACACATACGAACGCAAAATGCCCTATTCCCAGAGATATTATAAAAGAGGTTTGTCTGCCAT  
 GAAGAGATTCAAATTAATTTGCGATGATTTTGGTGTACCTGAAACTAGTGTGTCAGAGTAATTG  
 CAACAGAAGCCACGCGAGATGCTATTAACGCGGATGAATTTGTTAATGCTGTTTACGGTAGC  
 ACTGGCTGGAAAGTAGAAATATTAGGCCAGGAAGATGAAACTAGGGTCCGCATATATGGTGT  
 TGTTCCTCATTTAATACAGTAAGAGGTCTATATCTAGATGTGGCAGGTGGTAGTACTCAGT  
 TATCATGGGTAATAAGCTCGCACGGAGAAGTCAAGCAATCCAGCAAACCTGTATCTTTGCCA  
 TATGGAGCTGGAACCTTTTGGAGAAGAATGAGAACAGATGATAATAGGGCACTTTTTTATGA  
 GATTAAGAAGCGTACAAAGATGCGATTGAAAAAATTTGGTATACCTCAAGAAATGATTGATG  
 ACGCCAAGAAAGAAGGTGGATTTGACCTTTGGACCCGTGGGGGTGGTTAAGAGGTATGGGA

CATCTGCTTCTTTACCAGTCGGAAGGTTATCCCATCCAAACAATAATTAACGGATATGCTTG  
 CACTTATGAAGAATTCTCGTCTATGTCAGATTATCTATTCTAAAACAAAAAATACCAGGTT  
 CTTCAAAGAGCATAAAATATTTAAGGTTTCTGATAGAAGGGCTTTACAACCTCCTGCCGTT  
 GGTGTTGTTTCATGAGTGTGTTTTGAAGCGATTCCCCAGATCAAAGCTGTACATTTTAGTGA  
 GGGTGGTGTTCGAGAGGGTTCACTTTATTCTCTTCTTCCAAAAGAAATTCGTGCACAAGATC  
 CATTGCTAATTGCGTCCCGTCTTATGCTCCATTACTTACTGAAAAATATCTATATCTATTG  
 AGAACATCAATCCCACAAGAAGATATAACCAGAAATAGTAAACGAAAGGATGCTCCTGCTTT  
 ATGTAACCTTAGCATTTGTTTCATGCCTCTTATCCAAAGGAGTTACAACCAACAGCTGCATTAC  
 ATGTTGCTACAAGAGGGATAATAGCCGGCTGTCATGGATTATCTCACAGAGCTAGAGCGCTG  
 ATAGGAATTGCTCTATGTAGTAGATGGGGCGGCAACATTCCGGAATCTGAAGAAAAATACTC  
 CCAAGAATTAGAACAAGTAGTTCTACGCGAAGGTGATAAAGCTGAAGCATTGAGAATTGTAT  
 GGTGGACGAAGTATATTGGTACGATTATGTATGTGATTTGCGGTGTTTCATCCAGGTGGTAAT  
 ATCAGAGATAACGTATTTGATTTCCATGTTTCTAAGCGTAGTGAGGTGGAGACCAGTTTAAA  
 AGAATTAATCATTTGATGATGCAAACACTACAAAGGTAAAAAGAAGATCCACGCGTAAAAATC  
 GCGGGTATGAAGTGGTTGTGAGAATTAGTAAGGACGATCTTAAAACAAGTGCTTCCGTTTCGT  
 TCCAGAATTATCACGCTACAAAAGAAAGTACGCAAGCTATCTAGAGGAAGTGTAGAGAGGGT  
 TAAAATTGGCGTGCAATTTTATGAAGAATAA

>YBR061C 0.82 Cold

ATGGGTAAGAGCAGCAAAGATAAAAGAGATTTGTACTATAGAAAAGCAAAGAGCAGGGCTA  
 TAGGGCTAGATCTGCTTTCAAACACTTCAACTCAATGACCAATTTCAATTCCTGGATGATC  
 CAAACTTAAAAAGAGTTGTAGATTTGTGTGCAGCACCAGGTTTCATGGTCACAAGTGTCTCG  
 AGAAAACCTGTTTGATGAAAGTCCAGTTCAGATAAGGAGGACAGGAAAAATTGTCTCTGTGCGA  
 TTTACAACCGATGTCCCCCATAACCTCATGTGACAACGTTGCAAGCCGATATCACTCATCCTA  
 AAACATTGGCGAGGATTCTAAAACCTGTTTGGCAACGAAAAGGCCGATTTTGTGTTGTAGTGAT  
 GGTGCACCTGATGTTACTGGGTTACACGATCTTGACGAATACGTGCAACAACAGTTAATTAT  
 GAGTGCCTGCAACTTACTGCATGCATTCTGAAAAAGGTGGAACCTTTTGTGGCAAAGATCT  
 TCAGAGGTCGTGATATAGATATGCTATATTCCCAATTGGGCTATCTATTCGATAAAAATCGTT  
 TGCGCAAAGCCAAGATCATCAAGAGGTACATCTCTGGAAGCTTTTATTGTTTGTGTTAGGCTA  
 TAACCACCATCCAATTGGACACCAAATTAGATGTAAATACATCCGTTGATGAATTTTTTTC  
 AAGGCTGTTTTTTGAATAAATTGTGTATATCAGACAAATTGTCTCATTGGAATGAAGAGGAG  
 AGAAACATAGCCGAATTTATGGCTTGTGGAAGTCTTCAAAGTTTCGACTCAGATGCCACTTA  
 TCATGACCTACCTTCTTCGGTTGCAGGCACTTCATCGTCTTAGATCCTGTTCAAAGCCCGA  
 CGAACCTCCCTACAAGAAAGCTTTGGAATTA AAAAGGAGCGGGAAACTCACTAGATCAGTT  
 TGA

>YOL010W 0.75 Cold

ATGTCATCTTCCGCCCCCAAATACACCACCTTCCAAGGGTCACAAAATTTTAGGTTACGGAT  
 CGTCTTGGCAACATTATCAGGGAAACCAATAAAAATTGAAAAAATCCGTTTCAGGCGACTTAA  
 ATCCCGGTCTGAAAGATTATGAAGTGTCTTTTCTAAGGCTGATCGAGTCGGTCACCAACGGG  
 AGTGTAAATTGAAATTTCTTATACCGGTACTACTGTGATTTATAGGCCCGGTATCATAGTTGG  
 TGGTGCATCAACTCATATCTGCCCTAGTTCCAAACCGGTAGGTTATTTTCGTCGAACCAATGC  
 TATATTTGGCTCCATTTTCAAAAAGAAATTTTCTATATATTCAAAGGCATAACTGCATCT  
 CACAACGATGCCGGTATTGAAGCTATCAAATGGGGACTCATGCCCGTTATGGAAAAATTTGG  
 CGTTAGAGAGTGCGCCCTACATACTTTGAAAAGAGGTTCCACCACCTAGGAGGTGGCGAAG  
 TGCATTTGGTTGTTGATTCTTTGATTGCGCAACCTATAACTATGCATGAAATAGATAGGCC  
 ATAATTTTCATCGATTACCGGTGTAGCATACTCTACCAGAGTAAGTCCGTCGCTTGTGAATAG  
 AATGATCGATGGTGCTAAGAAGGTATTGAAAAATCTGCAATGCGAAGTTAACATAACGGCAG  
 ATGCTGGAGAGGTGAAAATTCAGGGAAGAGTCCAGGCTGGGGTATTACTTTGGTTGCTCAG  
 TCCAAGCAGAAAGGTTGGAGTTATTTTGCAGAAGATATCGGTGATGCAGGTTCTATACCTGA  
 AGAATTGGTGAAAAAGTTGCCTGTCAATTATTAGAAGAAATATCAAAGAGTGCAGCAGTTG  
 GTAGAAACCAGCTTCCATTAGCAATTGTTTACATGGTCATCGGGAAAGAAGATATCGGCAGA  
 TTGAGAATTAATAAGGAACAGATAGACGAAAGATTATAATCCTCTTGAGAGATATTAAGAA  
 GATCTTTAATACTGAAGTCTTTTAAAACCAGTTGACGAGGCGGATAATGAAGACATGATAG  
 CTACTATCAAGGGTATTGGTTTCACAAACACAAGCAAAAAGATTGCATAG

>YMR269W 0.8 Cold

ATGGATAGCAAAGAATATCTGATATCATATGGTTGGAAAAGAAGGAGAAGCGTTTAGAGAAGG  
 TGGTTTGAAGACCATACTGGTAAAGCACAAGAGAGATAAGAAGGGATTGGGTAATGCTC  
 CTGGCGGAATGATGGCGAAGCATGGTGGGAAAGGCTATTTGATGGACATCTGAAGAACCTG  
 GATGTAAGCACTGATTGCAATAATGGCAGTATTAATTTACTCAAAATGAGGCAGTTGCTAC  
 TGCTGTATCGAAAAGTAGCTCACCTCTATACAGGTGGTTTGTAAAGGGAGAAGGGCTGAAAG  
 GAACCATTACTAATCTTGGTAAAAAGGAGGAAGCCAGCTTGTGTATCTAGTGCAAGTTTCG  
 AGTAAAGGGGAAGAAGAGAAGAAGGCGTGATGAAGATGATAACAAGGTCAAGAGAAAAAATT  
 GAAAAAGATAAAAAGACTAGTAACGACAGTGAGAGTAAGAAGAAGAAGAAGAAAAAGCA  
 AGAAGGAGAGTAAAAAGGAAAAGAAAGTAAGCATAGCAGCGATGAAGGTGATAAATCGAAG  
 CATAAAAATCCAAAAGTCAAAAAACATAAAAAGGAAGAAGTTCAGCAAGAAGAGATAG  
 AAAGGAGCATATATGA

>YOR198C 0.79 Cold

ATGTCCTCCCAACAACAAGTTCAAGCGCCAGATGTCTCCGTTAGAGACAAGAAATTGGA  
 CACTCTTAACGTTCAATTGAAAAAATCGACACTGAAATCGGTTTAAATTAGAAAGCAAAATCG  
 ATCAACACCAGGTCACGATACCACCCAACAAGAACGTAAGAAGTTACAGGATAAGAACAAG  
 GAGATCATCAAGATCCAAGCTGACTTGA AACCCGTAGAAGCAACATTCACGACTCTATTAA  
 GCAATTGGATGCTCAAATCAAGAGAAAAACAACCAAATTGAGGAGAAGTTAGGCAAAAAGG  
 CCAAGTTCTCGTCCACTGCAGAAGCCAAGCAAAGAATCAATGAGATTGAAGAGTCTATTGCC  
 TCTGGTGACCTTTCTTTGGTTCAAGAAAACTACTAGTCAAAGAAATGCAATCTTTGAACAA  
 ATTGATTAAGGACTTAGTTAACATCGAGCCAATCAGAAAAGTCTGTTGATGCTGACAAGGCTA  
 AAATCAATCAATTGAAGGAAGAATTGAACGGATTGAATCCAAAGGATGTCTCCAACCAATTC  
 GAAGAGAACCAGCAAAAATTGAACGATATCCATTCAAAAACCTCAAGGTGTTTACGACAAAAG  
 ACAAACTTTTATTCAACAAACGTGCTGCCTTGTACAAGAAGCGTGACGAATTATACAGTCAA  
 TCAGACAGATCAGAGCTGACTTTGACAACGAATTCAAATCATTCAAGCCAAATTGGACAAA  
 GAACGTTTTGAAACGTGAAGAAGAACAAGATTATCCAAAACCTTTTGGAACAGAAAGATGTTGA  
 TATGGGTAAATTGCAAGAAAAGTTGACTCATGCCAAGATTCAGCCTTCACTTATGAAATCG  
 GTGCCATTGAGAATTCCTTTGCTTGTCTGGACCCAACCTTATGTGAAACCAAAGAAAAACATC  
 CTGCCTGACTTGAGTAGCAATGCTTTGGAGACCAAGCCTGCCAGAAAAGTTGTTGCTGATGA  
 TTTGGTTTTGGTCACTCCAAAAGAAGGATGATTTTGTCAATGTTGCTCCATCTAAATCTAAGA  
 AATACAAGAAGAAGAACCAACAGAAGAACAAGTGAATAAGGCAACCTGCTTCTATTTTCAAC  
 AAAGTCGATGGCAAGTTTACTTTAGAACCAACACTAATTGCTACTTTGGCCGAATTAGACGT  
 AACTGTCCCAATCAACAGTGATGATGTCAAGATCACCGTTGAGCAATTGAAGAAGAAGCATG  
 AAGAGCTTTTGTGCAACAAGAAGAGCAAACAACAAAACATTGAATCTGTGCAAAAAGGAA  
 ATTGAGAAATTAATTTGGACTACTCTAACAAAGAGCAACAAGTAAAAAAGGAATTGGAAGA  
 AAAAAGATTGAAAGAACAGGAAGAGTCTGAAAAAGATAAAGAAAATTAA

>YKL169C 0.69 Cold

ATGGGGTACTTTTTATTCTTATATGACCCTACTTGCCAAAGAGCATATCTTATTGTATCCCT  
 TGTCTTTCAGTGTTCTATCTACACAACCATCATTAGCCATAATTCTTGTCCCAGAGGTTCA  
 CCGTATTTTTTATTAATCAAAACGCAAGCAGTATCTCCGAATGCAACGGTGGAGCCATCCTT  
 TCTGCACATGTTACGCTGTTTAGACCTTACGACAATTGCGTGACAAATATCACCTTTTTTGA  
 CACGGTTGGTGTGGCTGTCCCCTAATGTTTTGAGTCAAGGGCTTTGCTTTCTGTATAACA  
 CAGACTATTCTGTCTCCAACCATTCAGGACTCTTGGGGACCCTTTCTTATTACTTTAAT  
 ACATTTCTGCTAA

>YHR054C 0.81 Cold

ATGGTACCCGCTGCTGAAAACCTATCTCCGATACCTGCCTCTATTGATACGAACGACATTC  
 TTTAATTGCTAACGATTTAAAATTACTGGAAACGCAAGCAAAAATTGATAAATATTCTGCAAG  
 GTGTTCTTTCTACTTGCCAGTAAATTTAACCAAAATTGAAAGTCTGTTAGAAACCTTGACT  
 ATGGGCGTGAGTAATACAGTAGACTTATATTTTCATGACAACGAAGTCAGAAAAGAATGGAA  
 AGACACTTTAAATTTTATCAATACCATTGTTTATACAAATTTTTTCTTTTGTTCAAAACG  
 AATCCTCTTTGTCCATGGCAGTTCAACATTCCTTCTAACAACAATAAGACCCTCGAACTCTGAA  
 AGATGTGCAAAAGGATCTGATGAAAATTATTTCTAATATGCACATTTTTTACTCAATAACATT  
 TAATTTTATCTTCCCATAAAGTCGATAAAGTCATTTTCAAGCGCAATAATCGCTTTCATT  
 CTAATGGTAAAGAATTTTTATTCGAAATCATTTTATTGAAATCTTACAGAATTTTATAGCA  
 ATCACATTTGCTATTTTCCAACGTTGTGAAGTAATATTATATGACGAATTTTACAAAAATCT

TTCAAATGAGGAGATTAATGTTCAATTGCTATTGATTTCATGACAAGATTTTGGAAATTTTAA  
 AAAAAATAGAAATTTATCGTATCCTTTTTACGAGATGAAATGAATAGCAACGGAAGTTTCAA  
 TCTATTTAAAGGTTTCAACAAGGTTTTGAATCTGATTAAATATATGCTGAGATTTAGCAAGAA  
 AAAACAAAATTTTGCAGAACTCTGATAACAATAATGTTACAGATTATAGTCAGTCGGCGA  
 AGAACAAAATGTTCTCTTGAATTTCCCGTTAGTGAACGAACAGAAATCTATTTAAAATTT  
 AAGGAGATTTTCAAGTTTTTAAATGGAAAGAGAAGTTGTCCAAAGGAGTATAATTATTGACAA  
 GGATTTGGAATCTGATAATCTGGGTATTACTACGGCAAACCTTCAACGATTTCTATGATGCAT  
 TTTATAATTAG

>YNR075W 0.76 Cold

ATGGGGGAAGAGATTAGACTTTTGTCTCTAAAGGTCTTGAGACCCATAGTAGCTTTTGT  
 GCCCGAGGATATTTTCAGAAACCGTTTAAACATGGTTGTGCAGTGAGATTCGCAACTCAGGAT  
 TTTGGATCTGGTCGCTATCATGGTTACCGCTTGCCGTTTGGTGGGGGATGGCCAGTACTTGG  
 TTTTATCCCCTTCTGACTTCAGTAGTTCTAATCCTGGCGCTAATTGCTATTTTGCCAGTAGT  
 TCAAATACAGTACAGTAAATATACTTTTATCAAATCAACTCACCCAGCTTTCTAAAGAAATCA  
 TCAAAGTGCACCAGGTGCATACTCTGCTGATTGGGACGCTGTTGCAATACATTTCAATTCC  
 TACTTGTATGAAAACAAAGCATGGAAAACCTGCACATTTTTTTTTTAAATGGTACTGACTGCCA  
 AGAAGCATTTCAGGAAAACCATTTCTAGAGCCAGCTGTTTTGAGGAGACAAAACGAAGATCCTA  
 GGTTCAGTTCAATTGAGATTTTGGTCCCTTACACCGAAGACGCGGTGCAGGTTTATTTTACA  
 AAAGTAAACGCACAGTGGAGGTTGATCCATGGTAAGAAGGAATGCAAACCTACTATGTTGGA  
 AAATGTCAAGCTTCTAAGGAAACCTATCGCTGCAAGCTAGCATGGAGTTGCCAGAGAATCA  
 GGATTTCTTTCTCTCCACTAGACTTTCCTTCTGATATGTCTGACTTCTTTATTTGTGCAAAT  
 TTATCACCAGCATGCTTGGTATCTTATTGGCTAATAGACATTTTCTTTAGAATGATAGATGA  
 TTTTCAAACATAAGGCCTAAATCGATGAAAAGTTGATGATAAAATGCAGTACCTATCAGATA  
 TTATAAACGAGCAGGGTCTAGCCCTGAAAAATGGGATACAATTGCAAGGAAAACGAATACA  
 CGATTATTTGAAAAGAGGGTCTGGAAAACGAAGAGTTTTTCTTTGATGGGACTGATTGTCA  
 GGCATTTCTTTGAACGGAACCTTAGTAGCCTTTTGTCTCAAAAAAATCTGCGTCGCTAGAT  
 CATTAAACGTTGAACCTTTGGAATACATTTCAAGAAGCGCAATTGAGCTGTAACCTATGAGCCG  
 TTACCATAA

>YCR019W 0.75 Cold

ATGATGAATGAAGAGGATTCTACAGAAACGAAAAGCCTAGTCATAACTAATGGCATGTTTAT  
 CATAGACGACATCGAGCGTAGTAAATATAATATTTCACTATAAGAATGTCCCAGGAGGCGGAG  
 GGACTTTTTGCCATTTTGGGTGCATGCATAATATCTTCCGGCAATGTCACATCCAAAGGTTTG  
 AAGTGGATAGTGGACAGAGGCTCTGACTTTCCAAAGGAAGTTATAAGGGAAATAGACTCATG  
 GGGTACTGATGTGAGTTTTCGAGATGACTTTAGCAGATTAACCTACCAAAGGTTGAATTATT  
 ACGAGGGAAGTGATGATTTGAGAAAGTTCAAGTTTTTTGACGCCGAAGAAGCAGATTAACGTC  
 GATGACTGGATTTCCACATTTGGGCAGAAGATAATTGATGAAATGCATGCGTTTCATTTGCT  
 ATGTTCTGGGTCTAGATGCTTAGACATAATAACGATCTGCTACGGGTGAAAAGTTCAAAGG  
 GCACAAAACCAATCGTGATTTGGGAGCCATTTCCAGATCTTTGCGACTTTGATCATCAAAT  
 GACATTTAAAGTGTAAATGCAGAGGAACGATGTTACGGTAATATTATCTCAAATGCCGAAGA  
 ATCAAGTCGCTTATTTGGTTTAAAGTAGCAAGGAACCGACTAGTTTGAAGAATGTCTAGCAT  
 TAGCGCATCGTTTCGATGATTTTCATGGATGAAAACAATATGTGTATTCTACGATGCGGTGCC  
 CTCGGAAGCATATCGGTAAGTGAGAAGTTTAAAGAACGGACGAACCTATGACCATTTCCCGC  
 CTACCATTTCAAACCTCAGTCTAAAGTACTAGATCCTACTGGCGGGGAAACTCGTTCCTTG  
 GCGGCTTTGCAGTTTCTTATGCCCTAACGAAAAGCTTAGATATTGCTAGTATATGTGGGAAC  
 ATCGCTGCAGGCGCAATAATTGAACAATTCGGAATACCGAGGTACGATCCAATTGCTAAAAC  
 CTGGAACGGAATCACATTTCTGGATAGACTGAAATTTTACCTTTTACAGTCCGGTCTTCAAT  
 ATAATATAAACGATCTTTACAAAAGTCTAACACGATGA

>YBR290W 0.8 Cold

ATGCCAGAGCAAGAACTACTTATAGGGCAAGAAATGAATACACTTCATGCAGGTTTCATCTAC  
 TGATGGCATAAATGTCGGAAACGCAGGACGAACTAGAGACACACAACTGGCGTAGAAGGGG  
 AAACGGAATAGGGTCTGACGAGGAAGATAGCATAGAGGACGAGGGAAGCAGCAGTGGAGGA  
 AATAGTACGACAGAAAGACTAGTACCACACCAGCTGAGGGAAACAAGCAGCCAGACATATAGG  
 AAAAAATAGGAAGACATTTTAAATATTCTTGATAGACTTTTTTAAAGAAACGTACACAACAGTCTT  
 CGGATATACAACAAGGTGCCATGTTTGTATGGTGTCTTTAGCAATTTAAGCGCAAACACAGAT

ACCACAGAGACTGAAGGTAATAACGAACAAGACATACCACCTACATACGACGAAGCTGCTGC  
 TGATATGGCCCCCTCGTATTATGGAATGGATTTGAACAATTCAGATATCTACTACGACGAAA  
 TATGCATTGAGGGGCTTCCTGTAGGAAATATAGCAAATTTATTATGGAATATCATCGTAAGC  
 ACGAGTTTTCAGTTCATTGGATTTTTAATAACCTACATTTTACACACATCTCACGCAGCAAA  
 GCAAGGTTCAAGGTTTGGATTAGGGTTAACGTTTCATTGGATATGGTTATTCAATGATCCCA  
 ATGATGTTACTTCAAAAGTCGGCAAAAATAAAAGCTTAAATAGAATGGAATTAGAGGATCCA  
 AATGAATTCGATGATGTTTCGTCTAAATTCACAATCAACGACACAAGATAAATTTGAATCACA  
 TTTGAATCACGGTCTGGATGAAGAAAAACAAAACATAACCATGGTTGGCTGTTTTTGTGGCAT  
 TTCTTGGGCTATTTATCACCTGAAGAGTATATACGACTACATTC AAGTCAAAAAATTGGAA  
 AAGAAATACCTCAACC AAGTCAAAATCAAGCATAA

>YNL252C 0.81 Cold

ATGAAGGTAAATTTAATGTTGAAAAGAGGGCTTGCTACTGCAACTGCAACTGCCAGTTCGGC  
 TCCCCCAAGATTAAGTTCGGAGTACTACTGTCAAGAATCCCTATAATTAATCAGAATTAA  
 ATGAACTAGAGAAAAATACTATGAGTACCAATCAGAACTAGAAAAGAGACTAATGTGGACG  
 TTTCCGGCATAATTTTTATTTCAAAAAGGGTACTGTAGCAGAACACAAATTTCTATCCCTGCA  
 GAAAGGACCTATCTCCAAAAAAAATGGCATTTGGTTTTCTAGAGGCATACCGGACATTAAC  
 ATGGCAGAGAAAAGAAGTACTAAGCAAGAAGTTAACTTTCTGATGACAGTACAGTAGCATTT  
 AGCAACAATCAAAAAGAGCAAAGCAAAGACGATGTTAATAGGCCCGTGATTCCCAACGACAG  
 GATAACGGAAGCAGATAGGTCAAATGATATGAAGAGCCTTGAAAGACAATTGAGCAGGACCT  
 TATATCTTTTGGTTAAGGATAAAAGCGGTACTTGGAAATTCCTAACTTCGATCTTTCTGAT  
 GAATCTAAGCCGTTACACGTACACGCAGAGAACGAATTGAAATTGTTGAGCGGTGATCAGAT  
 ATACACTTGGTCTGTTTTCTGCTACGCCCATAGGTGTTTTGCAGGACGAGAGAAATAGGACTG  
 CTGAGTTTTATTGTGAAGTCACACATTTTTGGCTGGAAAATTTGATTTGGTGGCGTCGAAAAAT  
 GATGCATTCGAGGATTTTGGCTGGCTGACAAAAGGTGAGATCAGTGAATATGTACCAAAAAGA  
 TTACTTTAACAACAGAAATTTCTTTTAGCGGATAATTGA

>YOL147C 0.74 Cold

ATGGTCTGTGATACACTGGTATATCATCCCTCCGTGACGAGATTCGTCAAATTTCTAGATGG  
 CTCAGCTGGCAGAGAAAAGGTTCTCAGATTACTGCAGTATTTAGCAAGATTTTTAGCAGTAC  
 AGAATCATCTCTCTTGGCCAGGCAATTACAAGCTCAATTTACCACAGTCAGAAAATTTCTG  
 AGGTTTCTGAAGCCTTTAAACCACTTGCAGGCAGCTGCTAAATTTCTACGATAACAAGTTGGC  
 CAGCGACAACGTCGTTAGAGTCTGCAATGTTTTGAAAAACATCTTCTTTGCTGCATATTTGT  
 CGTTAGATCAAGTCAATCTTTTGAAGATTTTGAAGTGATTCCCTGTAACCGTTCCTACCGGT  
 AAGAAAATACCTCGCTGGTCCAATTGGTGTGGCTGTTTCGGCCTCCTAAGTGGTCTGGCTAT  
 GGATCTTTCGTAAGATCCAAACATCTCATGCCAGATTGCTGCGTTTTGTCAAGGCAAAATCAC  
 AAAGCCAAGGCGATGAGCATGAGGATCACAAGAAGGTACTAGGGAAGGCATACCAAGACAGG  
 TACACCGCGTTAAGAAGACTATTCTGGGATGCTGCAGATTCGTTTCATCGTCCTCAACAACCT  
 AGGGTACTTGTCTAGCAACGAAGAGTATGTTGCGCTATCCGGTGTGTCACATCTATCCTTG  
 GTATGCAAGACATGTGGAAAGCTACATAG

>YMR186W 0.77 Cold

ATGGCTGGTGAACTTTTGAATTTCAAGCTGAAATCACTCAGTTGATGAGTTTGCATCAA  
 CACTGTCTATTCTAACAAGGAAATTTTCTTGAGAGAAGTACTCTCTAACGCCTCCGATGCTT  
 TAGACAAAATTAGATACCAAGCTTTGTCTGATCCAAAGCAATTGGAAACCGAACCAGATTTG  
 TTCATTAGAATCACCCCAAAACCAGAAGAAAAAGTTTTGGAAATCAGAGATTCTGGTATTGG  
 TATGACCAAGGCTGAATTGATTAACAATTTGGGTACCATTGCTAAGTCTGGTACTAAAGCTT  
 TCATGGAAGCTCTATCTGCTGGTGGCGATGTATCCATGATTGGTCAATTCGGTGTGGTTTT  
 TACTCTTTATTCTTAGTCGCCGACAGAGTTCAAGTTATTTCCAAGAACAATGAGGACGAACA  
 ATATATTTGGGAATCTAATGCCGGTGGTTCTTTTACCAGTTACTTTGGACGAAGTTAACGAAA  
 GAATTGGTAGAGGTACCGTCTTGAGATTATCTTGAAGATGACCAATTGGAGTACTTGGAA  
 GAAAAGAGAATTAAGAAGTCAATCAAGAGACATTTCTGAATTCGTTGCTTACCCTATCCAAC  
 TCTAGTCACCAAGGAAGTCAAAAAGGAAGTTCCAATTCAGAAGAAGAAAAGAAAGACGAGG  
 AAAAGAAGGATGAAGATGACAAGAAACCAAAAATTGGAAGAAGTGCATGAAGAAGAAGAAGAA  
 AAGAAGCCAAAACCAAAAAGTTAAAGAAGAGGTTCAAGAATTAGAAGAGTTGAACAAGAC  
 TAAGCCATTATGGACTAGAAACCATCTGATATCACTCAAGAGGAATACAATGCTTTCTATA  
 AGTCTATTTCTAACGACTGGGAAGACCCATGTACGTTAAGCATTCTCTGTTGAAGGTCAA

TTGGAATTTAGAGCTATCTTGTTTCATTCCAAAGAGAGCACCATTTCGACTTATTTGAGAGTAA  
 GAAGAAGAAGAACAATATCAAGTTGTACGTTTCGTCGTGTTTCATCACTGATGAAGCTGAAG  
 ACTTGATTCCAGAGTGGTTATCTTTTCGTCGTTGTTGACTCTGAAGATTTACCATTG  
 AATTTGTCCAGAGAAATGTTACAACAAAATAAGATTATGAAGGTTATTAGAAAGAATATTGT  
 CAAGAAATTGATTGAAGCCTTCAACGAAATCGCTGAAGACTCCGAGCAATTTGACAAATTTT  
 ACTCTGCCTTCGCTAAGAACATTAAGCTGGGTGTACATGAGGACACTCAAACAGAGCTGCT  
 TTAGCTAAGTTGCTACGTTACAATTCTACTAAATCTGTGATGAATTGACTTCCTTGACTGA  
 TTACGTTACTAGAATGCCAGAACACCAAAAAGAACATCTATTACATCACCGGTGAATCTCTAA  
 AGGCAGTCGAAAAGTCTCCATTCCTGGACGCCCTGAAGGCTAAGAAGTTTGAAGTTTTGTTT  
 TTGACCGACCCAATTGATGAATACGCTTTCACTCAATTGAAGGAATTCGAGGGTAAAACCTT  
 GGTGACATTACTAAAGATTTTGAATTGGAAGAAACAGACGAAGAAAAAGCTGAAAGAGAGA  
 AGGAGATCAAAGAATACGAACCATTGACCAAGGCCCTGAAGGATATCTTGGGTGACCAAGTG  
 GAGAAGGTTGTTGTTTCTTACAATTGCTAGATGCTCCAGCTGCCATCAGAACTGGTCAATT  
 CGGCTGGTCTGCTAACATGGAAAAGATCATGAAGGCTCAAGCCTTGAGAGACTCTTCCATGT  
 CCTCTACATGCTTCCAAGAAGACTTTTCGAAATTTCTCCAAAATCTCCAATTATTAAGGAA  
 TTGAAAAAGAGAGTTGATGAGGGTGGTGCACAAGATAAGACCGTCAAAGATTTGACTAACTT  
 ATTATTCGAGACCGCTTTGTTGACTTCTGGTTTCAGTTTGAAGAACCAACTTCTTTTGCAT  
 CAAGAATAAATAGATTGATTTCTTTAGGTTTGAACATTGATGAGGATGAAGAAACAGAAACC  
 GCTCCAGAAGCTTCTACCGAAGCTCCAGTTGAAGAGGTTCCAGCTGACACCGAGATGGAAGA  
 AGTTGATTAA

>YKL079W 0.74 Cold

ATGCACTGGAATATAATTTTCGAAAGAGCAAAGTAGCTCTTCTGTATCGTTACCAACTCTAGA  
 CAGCAGTGAACCCTGTCACATCGAAGTTATCCTCAGGGCGATACCCGAAAAAGGATTACAAA  
 ACAATGAGTCGACCTTCAAAAATAGACCCATATGAAAATACTGTGCTATTTTCGCACAAACAAT  
 CCGTTACATGAGACAACCAAGGAGACCCATTCAACATTTCAATTCGATAAGGTATTTCGATGC  
 TAACGCCACTCAAGAAGATGTTTCAGAAATTTCTGGTGCATCCAATAATAAATGATGTTTTGA  
 ATGGTTATAACGGTACTGTAATAACATATGGACCAAGTTTCAGCGGAAAGTCTTATTCCCTT  
 ATTGATCAAAAAGAAAGCGAAGGAATTCTACCGAACATATGCAAGACCTTGTGTTGATACGCT  
 AGAAAAAATGAAGAAACAAAGGGAGATAGTTTTAGCGTAAGTGTGTTTTGGCATTTCGAAATAT  
 ATATGGAGAAAACGTATGACTTATTGGTACCTTTTACCTGAAAGAAAACCATTAAGCTTCAC  
 CGTCTTCAAGCAAATGGACTTAGAAATCAAAGATATTTGTCCGGCACATGTCGGATCGTA  
 TGAAGACTTAAGAAGCTACATTCAGGCAGTCCAAAACGTCGGCAATAGGATGGCATGTGGCG  
 ACAAGACAGAGAGATCAAGATCACACCTAGTTTTTCAATTACACGTAGAACAAGGAATAGA  
 AAAGATGATATATTAATAAATAGTTCTTTATATCTGGTTGATTTACACGGGGCAGAGAAGTT  
 CGATAAAAGAACTGAAAGTACGCTATCACAAGATGCGTTAAAAAATTAACCAATCTATTG  
 AGGCGTTGAAAAACACTGTGCGTCCCTTGTCAATGAAAGAGCGTGATTCAGCCTACAGCGCA  
 AAAGGATCACATAGTTCTGCTTACCGTGAATCGCAATTAACGAAAGTGTAAAAGATTCCCT  
 TGGGGGAAATAGGAAAACAAAGGTGATATTGACATGTTTCTTAAGTAATGTTCCAACCTACC  
 TATCAACACTAGAATTTGGTGACAGTATTAGACAGATCAATAACAAGGTTACAGATAACACC  
 ACAGTTTTAAATCTGAAAAAATAATGGATCTATTTATTCAGGACATGAAAATTAAGGATGA  
 TAATTATGTTGCCCAAATTAATATACTAAAGGCTGAAATAGACTCTTTAAAAAGCCTTCACA  
 ATAAATCTCTCCCGAAGACGACGAGAAAAAATGTTAGAAAATACAAAGAAAGAAAAATATC  
 AAATAAAGCTTCAATTAGACAGTATTACCCAATTATTGAGTAGTTCTACCAATGAAGATCC  
 TAACAATCGTATTGACGAAGAAGTTTCTGAAATATTAACGAAAAGATGCGAACAGATTGCTC  
 AGCTTGAGTTATCTTTTGATCGACAGATGAATTCCAATTCTAAGTTGCAGCAAGAGTTAGAA  
 TACAAAAGTCAAAGAGGAAGCCTTAGAGTCTATGAACGTTAGGCTACTAGAACAAATTCAG  
 GCTTCAGGAAAGAGAGATTCAAGAGCTTTTAACTACTAACGCCATCTTAAAGGGTGAACCTAG  
 AAATCACACTAACTTACTGAAACACGCAGTGAAGGATAAAATCTTTGGAAGTTCTGTGTC  
 AAAGAGCTTTCTCTTAATAAATCTGCAATCCCATCTCCTAGAAGAGGGTCTATGAGCTCGTC  
 ATCAGGAAATACTATGTTGCATATCGAGGAGGGTCTGAAATATCAAATAGCCCTTGGTCAG  
 CCAATACTTCCCTCAAACCTTTAGTATGGGGCGCGAGAAAGGTTTCTTCTAGCAGTATAGCA  
 ACCACTGGATCACAGGAGTCTTTTGTGGCAAGACCGTTCAAGAAGGGATTAACCTCCATTC  
 GATAAAAGTCACTTCGAGTACTCCAAAAGTCCCTCTTCTGGAAGCTGA

>YNL237W 0.67 Cold



ATGACAGCAGCTAATAAGAATATTGTCTTCGGATTTTCCAGATCCATTAGCGCAATTCTACT  
 AATATGCTTTTTCTTTGAAAAAGTCTGCGGTGATATGGAGCATGATATGGGCATGGATGATA  
 CTTCTGGGATACACGAGGCCAGAAATTGTGCAGGCTGGGTCGAAATCTTCCACTGGCTCTGC  
 ACTTTGGGATTCTTGTGCTTTTACCATCCGTGGTGACGTGCCTTTCTGTTTCGCTGGCAGGAT  
 ATATTCAGCTACCTCTTACAATGCACCTTGTGCCGTTTACGCTTTCTTAGAAGCTGCCGTAT  
 TAAGATTTCAAGACAATGATGGGGTAGAAAAAGAACTTCAAGGGGAACCGCATGGTTTTTG  
 GTGGGACTTACTTGGATAACCTTATTCTTTGGTGGATTAGCTGGAGGAACGGTTTTCTTAGT  
 GAAAAGCAAGAGGTTGCAAACGTTTCAATATCAAATGCAGGTGAGAAAAGGTTGTCATATATCC  
 ATCGTGGTTTTATCCTTTCTAACTGTTCTAACAGGTTGGGTTAAAGTCTGTTTGGCACCTGTT  
 GCGCTCTTTGGGTTTTGTAGAGAGGCACACACAGGGCAATGCATCGCTCATGGTATCATGGG  
 ATCCGCGTTTTGTGTTGTACGGGTTTCAATTTATGTACTGGTTTTGGTTATAACCATGGATTGCGA  
 GTGCCCAAACCTCATATTCACAGGATTACGTCGACAGTTGGGTTATGTGCATATGGGGCGTT  
 GTAAATACTTTTACTGAACACAGGTGGGGACGTGAAGGATGGAGTGTTCACGATTATCAACA  
 CACGTTTATGGGAATTATCTGGTGGACTGGTGGAACTCGGGATTTTCTTTCCAGAAATG  
 GCAGAAGAACATTTGTACCAAGTTTGATTATTTTACCAGGATGGGCCATGTCTGAGCAC  
 GCCCAGCACTTGATAATTAGCACAAAAGTCCATAATATGTTGGGCTAGTTTTAATGTGTGG  
 AGGCGCTTTAAGAATTATCGAAATATCTTTTACTACGTGATAAAAAGAACGCTGGACAAAA  
 TACATTCATTCCAATACCTTGCTCCCTTTTGTTTAGTATGTTTCAAGGCTCCTATTTATGGGC  
 GCAAACGAAGAACAACCTCATTTTAGTGTGCGGTTGGGAGGCGACCATAGTGCCTACGTTCT  
 AATTATCGTATCAGGCGCATTTTGGTCTACTTCTGGATGATTGCATGTTTGAATTTCTACC  
 TATATCTACTTGAAAAGGGAAAACAAGGATTCCTTCCGAAATCATACGAACTTGAAGAGGAA  
 AACATAACGTGAGCTTTGAGCTAGATAACATATCGAACGAAGATGTGGATGAAGATACCAC  
 TCCCTTTAACGTTTGA

>YNL286W 0.81 Cold

ATGGATGCTGATGAATTGGAATTGAAAGGTCATTTGAAAAAATTGAAAAAGAAGAATTGCT  
 TAGAAGGAAACAGTTAAAAGAGAGTAATCTTCAGAAAAGAGAGCTTGAATATAATAATGCCT  
 CAAAAAATACTTCAATATATATTTCTGGTCTTCCCACAGACAAAACAACGAAAGAAGGACTC  
 ACTGAGCAGTTTTGCAAGTATGGAATGATAAGAACCAATCGAGATGGGGAACCCCTTTGCAA  
 GCTATATGTGAATGATAAAGGCGCTTTCAAAGGGGATGCCCTTGATCACTTATTTCCAAGGAAG  
 AAAGTGTACATTAGCAATCGAAATGATGAACGAGTCGATCTTCCCTGGGAAAACAGATCAGG  
 GTCGAAAGAGCCCAATTTCAAACAAGGAAGGTGACAATATGCACGGGAAAGAAAATGATTT  
 AAAGGAGTTCAACGGACCTGAGCCTCCAATAAAGAGGCTAAAAAAGCGAAGTCTGAAGGGG  
 AGGGGGAAGTAATAGATTACAATGACGATGAAAGCCTAGCAAAGCTGATCGAACGGTGATA  
 TTTGCCAACGTATTCAATATTTACAAATCATACACAAATGATGATATAAATGATATTCAGGA  
 AGATCTTTTGAAGGCTGTGAAGAGATAGGTCAAGTAGACAGTATATCTGTATCTCCCAATA  
 AGGGGGAAGCGACGGTCGTCTTTAAGAACAATAAAGTTGCATTGCAATGTTGCAAAATCATG  
 ACCGACGTTATTTGATGGGCAAAGTTGCTTGTCTTTCATTTCTGGAGATGAGAACACTTC  
 AAGCACAAGTGACAAGAATGAGGACAGCGAAGTGAAGATGACCTTATATAG

>YLR008C 0.75 Cold

ATGAGTTCTCAAAGTAATACTGGTAATTCTATTGAGGCACCACAACCTACCATTCCCTGGTCA  
 AACTAATGGCTCTGCGAACGTTACTGTTGATGGAGCTGGTGTTAATGTCGGTATCCAGAATG  
 GTTCGCAGGGTCAAAGACCGGAATGGACCTTTATTTTATGATCAAGCTTTGAACTACATGGGA  
 GAACATCCTGTGATAACAGGTTTTGGGGCCCTTTTAACTTTATATTTTACAGCCGGTGCATA  
 TAAATCAATATCGAAGGGACTTAACGGTGGAAAATCCACTACTGCCTTCTTGAAGGCGGAT  
 TTGACCCGAAAATGAATTCTAAAGAGGCTCTACAGATTTTGAATTTGACAGAAAATACATTG  
 ACTAAAAAAGTTGAAAGAGGTTTCATAGGAAAATTATGTTAGCTAATCATCCTGACAAAGG  
 TGGTCTCCATTTTGGCCACTAAGATAAACGAAGCTAAGGACTTTTTGGAAAAAAGGGGTA  
 TTAGCAAATAA

>YKL138C 0.73 Cold

ATGTTTGGCCCATTCAAATTAACAAGCCCCGTCGCTGGTGGCCTACTATGGAAAATTCATG  
 GAGAATGTCCACACATCAAAAAACCCGTCAAAGGGAAAGATTAAGAAACGTTGATCAAGTCA  
 TAAAGCAATTAACTTTAGGTCTCCACGTCCAAAGATGTCAGGATAAAGGCTTACTTATCAA  
 GAAGCCATGGAGAGCAAAAAGAAATACAAGCCAAGAAGTAAATCGTTAAGGTTGTTAAACAA  
 ACCATCAGTCTTCCAAAGGAGAATCAAATGTCTTCTAAAGATAAATATGGACTTTTGATA

AAAAAGCTGTTGGTTATAGGAAGGGTATTCATAAGGTGCCCAAGTGGACGAAGATTTCCATT  
AGAAAGGCCCCAAAATTCTTTTGA

>YPL167C 0.78 Cold

ATGTCGAGGGAGTCGAACGACACAATACAGAGCGATACGGTTAGATCATCCTCTAAATCAGA  
CTATTTTAGAATCCAGCTAAATAATCAAGACTACTATATGTCAAAACCCACCTTTTTGGACC  
CATCGCACGGTGAAAGCCTGCCCTTAAACCAGTTTTACAGGTCCCAAACATCAGGGTGT  
GGTGCTTTACCCACAGGGCATCAAGTATTGTGCCACGTCCATGGCATTCTACCTTACATGTT  
CATCAAGTATGATGGACAAATAACTGACACGAGTACATTGAGACACCAAAGATGTGCCCAAG  
TTCATAAAACGCTGGAAGTAAAAATTAGGGCATCCTTTAAAAGGAAAAAAGATGATAAACAC  
GATTTAGCCGGCGACAAACTTGGAAATCTCAATTTTGTGCTGATGTCTCTGTTGTAAAGGG  
TATACCATTTTATGGTTACCACGTTGGCTGGAATCTGTTTTACAAAATTTCTTTGCTTAATC  
CTTCTTGTCTAAGTAGGATTTTCGGAATTGATTAGAGATGGCAAGATTTTCGAAAGAAAATTC  
GAAATTTATGAATCACATATTCCTTACTTGGCTACAATGGACCGCAGATTTTAACTTATTTGG  
ATGTTTCATGGATAAACGTGGATAGGTGTTATTTTCGCTCTCCTGTTTTAAATAGTATACTGG  
ACATAGATAAGCTGACAATTAATGATGATCTTCAGTTGTTACTAGATCGATTTTGTGACTTC  
AAGTGTAACGTACTCAGTAGAAGGGATTTTCCACGGGTGGAAATGGATTGATTGAGATAGA  
TATACTACCGCAATTCATCAAAAATAGAGAAAAGTTACAGCATAGAGATATACATCACGACT  
TTTTGGAAAACTGGGAGATATTTCTGACATACCTGTCAAACCATATGTATCCTCTGCTAGG  
GACATGATAAATGAACTTACCATGCAACGAGAGGAGTTGTCCTTGAAGGAATATAAAGAACC  
ACCAGAAACAAAGCGCCATGTGAGTGGTCATCAATGGCAATCTTCTGGAGAGTTTGAAGCGT  
TTTATAAGAAAGCACAACATAAAACAAGTACTTTTTGATGGTCAAATACCAAATTTTGAGAAC  
TTTATAGATAAGAATCAAAAATTCCTCAGCCATAAATACGCCCTATGAAGCATTACCGCAATT  
GTGGCCAAGGCTTCCACAGATTGAAATAAAACAATAATAGTATGCAAGATAAAAAGAACGACG  
ACCAAGTTAATGCATCGTTCACCGAATACGAGATATGTGGTGTGATAATGAGAACGAAGGT  
GTAAGGAAGCAATATAAAGTCTCGGTCTTATTCATGGTTACCGGAAAGCATTGCGTCTCC  
GAAAGATTCTACTATACTATTAGATCATCAAACAAAATATCACAATACGATAAATTTTTCAA  
TGGATTGTGCTATGACGCAAAAATATGGCAAGTAAACGAAAACCTTAGATCATCTGTTTCTGCT  
AATAAAACATCGTTGCTGTCTCGGAAAAGAAAAGAAGGTTATGGCTGCGGGATTACGCTATGG  
AAAAAGAGCCTTTGTTTTATGGTGAGCCTCCTTTCGGTTATCAAGATATTCTGAATAAATTTGG  
AAGACGAGGGATTCCCAAAAATAGACTATAAGGACCCTTTCTTTTTCGAATCCAGTTGATCTA  
GAAAATAAACCTTACGCGTACGCAGGTAAGAGGTTTGAATAAGCTCGACACATGTATCAAC  
GAGAATACCCGTCCAATTTGGGGGAGAGACCGTATCAGTTTATAACAAGCCAACCTTTCGACA  
TGTTTTCTCCTGAAATATGCGTTAAAACCACCTACGTATGATGCTGTTCAAAAATGGTAC  
AATAAAGTACCCTCGATGGGAAACAAAAAAGTGAAGTCTCAGATAAGCATGCACACCCCTCA  
TAGTAAGTTTTTATACAAAATTTGCTAGTGACGTTTTCTGGAAAACAAAAAAGAAAAAAGTA  
GCGTTCACGATTCTCTTACTCATCTGACACTTGAGATTCATGCAAACACGAGAAGTGATAAA  
ATTCCAGACCCTGCAATAGATGAAGTTTCCATGATTATATGGTGTCTTGAAGAAGAACTTT  
CCCTTTAGATTTGGATATCGCTTACGAAGGGATTATGATAGTCCACAAAGCTTCTGAGGATA  
GTACATTTCTACTAAAATTCACATTGTATTAACGAAATCCCCTGATGTTCTATGAAAGT  
GAATTTGAAATGTTGAGGCTCTAACTGATTTGGTATTACTTCTTGATCCTGATATTTCTTTC  
CGGTTTCGAAATACATAATTTTCGTGGGGTTATATAATTGAAAGGTGTCAAAAATAACATC  
AATTTGACATTGTCAGGGAACCTGCCAGAGTCAAATGCCAAATTAAGACGAAGTTGTCAGAT  
ACTTGGGGATATGCCATTCTCAGGAATTATGATTACCGGAAGACATATGATTAATATATG  
GAGAGCGTTGAGGTCCGACGTAATTTAACGCAATATACTATTGAAAGTGCTGCGTTCAATA  
TCCTCCATAAACGATTACCTCACTTTTCATTTGAGTCATTAACATAATATGTGGAACGCTAAA  
AAGAGCACAAACGAATTAAGACTGTGTTAAATTTATTGGTTATCAAGAGCTCAGATAAATAT  
ACAACATTAAGAAAGCAGGATTACATTGCTCGAAATATCGAACAGGCAAGATTGATAGGAA  
TAGATTTCCATTCTGTATATTACAGAGGATCACAAATTTAAAGTTGAGTCTTTTTTAATCCGA  
ATATGCAAGTCCGAAAGTTTTATCCTTCTTCTCCAGGCAAAAAGGATGTTTCGTAAGCAAAA  
AGCACTTGAATGTGTGCCTTTGGTTATGGAGCCAGAATCTGCTTTCTACAAAAGTCTTTTAA  
TTGTGCTGGATTTCCAATCATTTGTATCCATCCATTATGATTGGATACAACTATTGCTATTCG  
ACTATGATAGGAAGAGTGCAGAAATAAACTTAAACGGAAAAATAACCTTGGAGTATCTAAGTT  
TTCATTACCAAGAAACATTTTAGCTTTATTAATAAATGATGTAACATATCGCTCCAAATGGTG  
TTGTTTATGCCAAGACCTCTGTTAGAAAATCAACGTTATCCAAATGTTAACAGATATCCTT  
GATGTCAGAGTGATGATAAAGAAAACAATGAACGAAATAGGTGATGACAACACTACCCTAAA  
AAGGCTTTTGAATAACAAACAGTTAGCACTAAAATTTATTGGCGAATGTCACCTACGGTTATA

CATCAGCTTCATTTTCTGGACGAATGCCATGCTCTGATTTAGCTGATAGCATTGTACAAACA  
GGCAGAGAAACATTGGAGAAAGCAATAGATATTATTGAGAAAGATGAAACTTGGAACGCCAA  
AGTTGTCTATGGAGACACAGATAGTTTATTTGTATATCTACCTGGAAAACTGCTATTGAGG  
CTTTTCTATAGGACATGCTATGGCAGAAAGAGTTACTCAAACAATCCAAAACCAATCTTT  
TTGAAGTTTAAAAAGTATAACCATCCCTCCATATTAATTAGCAAAAAAAGGTACGTAGGATT  
TTCTATGAAAGTCCTTCGCAGACCCTTCCATTTTTTGTATGCTAAGGGTATTGAAACTGTTA  
GAAGGGATGGTATCCCAGCCCAGCAGAAGATTATTGAAAAATGTATTTCGATTACTTTTTCAA  
ACCAAAGACCTGTCAAAAAATAAAAAAGTATCTTCAAAATGAATTTTTTAAGATTCAAATAGG  
AAAGGTATCTGCCCAAGATTTTTGTTTTTGCAAAAGAAGTTAAATTAGGAGCGTATAAAAAGCG  
AAAAGACAGCCCCGTCAGGTGCCGTGGTTGTAAAAAGAAGAATAAATGAAGACCATAGAGCA  
GAACCCCAATACAAGGAGCGTATACCTTACCTTGTGTAAAGGAAAGCAAGGACAACCTGCT  
TCGGGAAAGATGCGTATCACCAGAAGAGTCTTAGAAGGTGAGAATTTAGAGTTAGATTCCG  
AGTATTATATAAAACAAAATTTCTGATACCTCCTTGTATAGATTGTTCAATTTGATTGGTATA  
AATGTTGGCAACTGGGCTCAGGAAATAGTAAAATCCAAAAGGGCGAGCACAACCTACTACAAA  
AGTGGAACATAACAAGAGTAGGAACCTTCTGCAACATGTTGTAATTTGTGGTGAAGAATTGA  
CTAAAATATGTTCACTTCAGTTATGTGATGACTGTTTTAGAGAAAAGAAGCACCACAACCTTA  
TCATTTCTCATAAAGAAATTAAGAGACAAAAAGAATACCAAACACTAAAGACCGTGTGCAG  
GACGTGCAGTTATCGTTACACTTCCGATGCAGGCATCGAAAATGACCATATAGCTAGTAAAT  
GCAATTCATATGACTGTCCAGTATTTTACTCTCGTGTCAAAGCAGAAAAGATACTTGAGAGAT  
AATCAATCTGTTCAAAGGGAAGAAGCATTAAATATCTCTAAATGATTGGTAA

>YPL022W 0.74 Cold

ATGCTCAGTTATTTTTATCAGGGCGACTCTGATGATGAGCTCCAGGAGGAACCTTACGAGGCA  
GACAACTCAAGCATCTCAAAGTTCTAAAATTA AAAATGAAGATGAACCCGACGACTCCAATC  
ATCTTAATGAGGTGGAAAATGAAGATAGCAAAGTTTTAGATGACGATGCAGTGTATACCCCT  
CTTATACCTAATGAGCCAGATGACATAGAAACGTCTAAGCCCAATATTAACGATATTAGGCC  
AGTTGATATTCAATTGACTTTACCATTGCCGTTTCAGCAAAAAGTGGTAGAGAATTCATTAA  
TTACTGAAGATGCATTAATCATAATGGGGAAAGGACTAGGATTGCTTGATATTGTGGCCAAT  
TTATTGCATGTTTTAGCTACACCAACATCCATTAACGGACAACATAAGCGAGCGCTCGTCCT  
AGTGTGAATGCAAACCTATAGATAATGTAAGAATCAAGGAGGCCTTAGAAGAGCTGTCGT  
GGTCTCTAATACTGGGAAGGACGACGACGATACTGCTGTCGAGAGCGATGATGAACTTTTT  
GAAAGGCCTTTTAACGTAGTTACCGCGGACTCGCTGAGCATTGAAAAGAGAAGAAAGCTATA  
TATTTCTGGCGGAATCTTGAGCATTACTTCTAGAATTCCTATTGTGGATCTCTTATCCGGCA  
TTGTTACCCAAATAGGGTTACGGGTATGCTGGTATTGAATGCAGACTCACTTCGACATAAT  
TCGAATGAATCGTTTTATATTAGAGATTTACAGGTCTAAAAATACTTGGGGTTTTATTAAAGC  
CTTTTCTGAAGCACCAGAGACGTTTTGTCATGGAATTTTCACCCCTCAGGACGAAAATGAAAG  
AATTACGGCTAAAGAACGTTTTGCTATGGCCGAGGTTTCAGGTTAGAGGTCCTTCCCTGTTTG  
AATGCCACTAATAAGACGTCACACAATAAAGTCATTGAAGTCAAGGTCTCCTTAACAAATTC  
CATGTCTCAGATACAGTTTTGGCTTGATGGAATGTTTTGAAAAAATGTATTGCTGAGTTAAGCA  
GAAAAAATCCTGAAC TAGCTCTGGACTGGTGAATATGGAAAATGTCCTGGATATAAACTTT  
ATCAGGTCAATTGACTCGGTGATGGTGCCGAACGGCACCGAATTTCTTATGAATCAAAACA  
ACTGGTTAAGGATATAAGATTCCTACGCCACCTTTTAAAGATGCTCGTAACCTCAGACGCAG  
TTGACTTTTTTGGAGAGATTCAATTAAGTTTGGATGCCAATAAACCAGTATCCCGAAAA  
TACAGCGAATCACCGTGGCTATTGGTCGATGAGGCACAATTAGTCATATCGTATGCGAAGAA  
AAGAATATTTTACAAAAATGAATATACTTTAGAAGAAAAATCCAAAATGGGAACAACCTTATTC  
ATATATTACATGATATTTACATGAGAGAATGACCAATCACCTTCAGGGGCCCTACTTTAGTT  
GCCTGTTCCGACAACCTTACATGTTTTAGAACTAGCAAAGGTCTTGAATGCCTCAAACAAAA  
AAGAGGAGTACGTCAAGTGCTTCTGAATAAATGAAATGGTACAGAAAACAGAGGGAGGAAA  
CGAAAAAATTTGGTCAAAGAAGTGCAAAGTCAGGACACTTTTCCAGAGAATGCAACATTAAT  
GTAAGCTCGACATTTTCCAAAGAACAAGTGACCACGAAAAGAAGAAGGACAAGAGGTGCTTC  
ACAAGTTGCGGCCGTTGAAAAGCTAAGGAATGCAGGTACCAATGTAGATATGGAGGTGGTTT  
TTGAGGATCATAAGTTATCTGAAGAAATTAAGAAGGGAAGCGGTGATGATTTGGATGACGGT  
CAGGAAGAAAATGCCGCAAACGATTCAAAGATTTTTGAAATACAAGAACAGGAAAATGAAAT  
CCTTATCGATGATGGGGATGCTGAATTTGACAACGGAGAATTAGAGTATGTGGGCGACCTTC  
CGCAGCACATACAACCCATTTCAATAAGGATTTATGGGCAGAACATTGCAACGAGTATGAA  
TATGTTGATCGTCAGGACGAAAATTTAATCTCTACGTTTAAAAGTCTCAATGACAATTGCTC  
ATTGCAGGAGATGATGCCCTTACATTATAATGTTTTGAACCAGATATATCGTTTTATCAGG

AGATTGAAGTTTATAAGGCCATAGTGAAGGATTTGCAACCAAAGTATACTTCATGTACTAC  
GGTCAAAGTATTGAAGAGCAAAGTCATTTGACTGCTATCAAGAGAGAGAAAGATGCTTTCAC  
AAAGTTGATTAGAGAGAATGCAAATCTGTCCCATCACTTTGAAACGAATGAAGATCTTCTC  
ACTACAAAAATTTAGCTGAAAAGGAAGTTGAAGCTTTCAAAATTACGAAAATCTAATACCAGA  
AATGCGGGTGGGCAGCAGGGATTCATAATCTTACTCAGGATGTCGTCATTTGTGGATACACG  
TGAGTTTAAATGCCTCATTACCAGGCTTACTCTACCGATATGGCATAAGGGTTATTCTTGT  
TGTGACAGTCGGCGATTATGTGATAACTCCTGATATTTGTCTCGAAAAGAAAATCGATTTCT  
GACTTAATTGGGTCATTACAGAATAACAGATTAGCCAACCAATGTAAAAAATGTTAAAATA  
CTATGCATATCCGACACTATTGATTGAGTTTGTGGAAGGACAGTCGTTTTCTTTAGAACCCTT  
TTAGTGAACGTAGAAATTATAAGAATAAAGACATATCAACTGTTCATCCTATATCAAGCAAG  
TTATCCCAGGATGAAATTCAGCTAAAAGTAGCCAAATTAGTATTGCGGTTTCCCACCTTAAA  
GATTATATGGTCTTCTCACCCTGCAAAGTAAATATAATCCTAGAGTTGAAATTAGGAC  
GTGAGCAACCTGACCCTAGTAATGCAGTTATATTGGGAACGAATAAAGTTAGATCGGATTTT  
AATAGCACTGCAAAGGGCCTGAAGGATGGTGATAACGAGTCTAAATTCAGAGACTGTTGAA  
TGTTCCTGGAGTGTCAAAAATGATTATTTCAATCTCCGCAAAAAGATCAAGAGCTTCAATA  
AGCTTCAAAAGCTTTCATGGAATGAGATTAATGAACTTATTAATGACGAAGATTTGACGGAT  
AGAATATACTACTTCTTGGAAACGAAAAAGAAGAACAAGAACAAGAGTCAACAGATGAAAA  
TCTTGAATCTCCTGGTAAGACCCTGATGATAACGCTTTACATGATCATCATAATGATGTTT  
CTGAAGCACCTGTGTAA

>YIR023W 0.68 Cold

ATGGACCCTCACCAATCACCAGCTGATAATGCCGCATCGCCTACGAAGAGCGTGAAGGCAAC  
CACTAAAAATTCGTCCACGAATAATAATGTCAATAGCAACAACAGCAATAATAACAGTAACC  
ATGATATACTGAATTTTTAATGATAACTATACTACCATTCTGCAACATTTGGCAAACGACCAT  
CCTAATATACTGAGGGAGAAAAGGAGGATCACAACAACAACAGCATCAGCAGCAGCAACAACA  
GCAACAACAGCAGCAACAACAGCAGCAACAACAGAGCCTGGATACCCTTTTGCACCATTATC  
AAAGTTTACTCTCCAAGAGTGATAATGCAATAGCCTTTGATGACAATGTTAGTAACAGCGCA  
GATCATAATGGCAGTAATAGCAACAATAATAACAACAATAATGACATATCTAGTCCCGGTAA  
TCTGATGGGATCTTGCAATCAATGTAGATTAAAGAAAACAAAGTGCAACTATTTTTCCCGACC  
TAGGCAACTGTCTCGAATGTGAAACGTCAAGAACTAAATGCACCTTCAGTATTGCTCCAAAT  
TATTTGAAAAGAACGTCCTCTGGGGCAAACAATAACATGCCAACCTCTTCAAACCTCCAAACG  
AATGAAAAATTTTGAAGACTATTGCAATCGCTTACCCAGTAGCATGCTCTATAGACATCAAC  
AGCAGCAGCAACAGCAACAGCAGCAACAGCGTATACAATACCCAGATCCTCTTTTTTTCGTC  
GGTCCGGCCTCAGTTTTTCGATTTGAACTTGACCAAGCATGTAAGACTAGATAATGTTGACCA  
AATACAGCTATCAAAAACCTTATCATTAAAGAAAGGTGTCTCCTACCGCACAGTTTTATCTTC  
AGGACGATTTTACACGACCCCTCATAGTAAGCAAGAATACGAAGTTGATTTGGTTCGAAAAT  
CTGGTACATCCGCACGGTCACCTTTTTAGTAGAGATTTTCTTCAAATGATTCATCCTTTTCT  
TCCAATTTTACACGAACGTGTATTTTTGGAAAAGTATTCTAGATCTTATAGAGAACTCACTG  
CGCCTTTACTGGCATCCATTTACTCACTGGCATTACAATATTGGGATTTTTCATCCTGCACCT  
TTGGGGTTCCCTAAACCCGATGTAAGTCACTCAACTAAACAATATCGCATTGGAAACATTTTA  
TGCTCGAGTTGGAAGGCCAAAATTGAGCATTATACAACAGGCCTTTTGTATTTGCAATGCC  
GTAGTGAATGTCATAAACAACCTGGGTCCTCTGCTCCAGCGTAGTGGCCCTTGCAGAGGAATTG  
GGGCTCGGGGTTGAATGTAATGATTGGAAACTTCCCAAATGGGAAAAGATTTGAGAAAGAG  
ATTAGCGTGGGCAGTTTGGTTGATGGATAAATGGTGTGCATTAACGAAGGTAGACAATCCC  
ATTTAATTTTAGGTAGGAACCTGGATGATCAAGCTATTAACCTTTGATGATTTTCTCTGAAT  
TCGCCACTATTTTAAATTCCTTGCAAAATGACCAGTCGGGGTCTTACCCTCGTCATCAAA  
TGATGTGAAAAACCATCAGATAGCATTGGTAACTTGCCCATATTTAACATAAACCCCACTT  
TAGAAGATTTCAAGAATGGAACGCTTATGTTTCAACAAATGGTTTCTTGGAGTATAATCTT  
GGGAAATCATGGACACATTTTACTCAGGGATCCATGACAATAAACAAGCATTGAACA  
GGTATTGAAACTGGCAAAGCCGTTGCAACTGAAATTAAGAGAATGGTACCATTCCCTACCCA  
AGAATTTGTCAATGAGTTATGCCACGCCACAAAATGAACTCAAATTCAACTTAACTCTA  
GCTTATTTTGGCACGGAAATTACGTTACATAGGAAAATATCTGTGCCTTGAATCCTCAAAC  
TCCAAAGGAACCTGGTTCAAGTATGCAGGACTGCTGCAAGAACCAGGCTTGTAGCAGCAATTG  
AATTTATAAGAGATCTAAAAACGAACATATTAATGCTTTTTGGTATAACTGCTCAACTGGA  
AATCTGATGCTAATTGGAACATTTGCTGCCCTGCTGTATGTGACTTCAGCTACGAAGGAAGA  
GGCTATGATTTTCAGAGATTATGTTAGAAATATACTGGGTATTGAAGATAGGTTCCAAAT  
ACTTTGATAAACTATCGAATGCTTTGAATAATATGCATTTACTATTTGCACAAATTCCTGGT

CTTCTGACCGATGAACCGGTGGTCGTGAGCCCTAACTCTAACATCAATTCGGTTAACCCACA  
 AAGGTCAGGTGTACAATCGCAAATCCCAATACAATTTAACGTGGGATCACCTGCCATGACCG  
 AGCAAGGATCTCCTTTAAACCAGTGAAGAATTTGCCCCAGGAAATCTTGCAACAACATAAAC  
 TCCTTTCCCAACGGTACGACCAGTACAACAACGCCAGTAAACCCCACTCCAGACAAACACA  
 ACTAGAATCGCAGGGAAGTCCAGCCATAAATAGTGCTAATAATAATAGCAACAACACGCCTT  
 TACCATTTGCGCAAATAAGTCTTCTAAAAAACTTCACAATCTTCACCAAATGTTACGCCC  
 TCTCATATGAGCAGACACCCCCCTCTAATACATCTTCACCAAGAGTCAATTCCAGCACAAA  
 TGTCAACTCTAATACACAAATGAATGCTTCTCCCTTGACCTCAATTAACGAAACCAGACAAG  
 AGTCAGGTGACGCTGCAGATGAAAAACAGCAGGAAGAGAAAGAACCGCCAACGAGGAATCA  
 TCAACGGAACCTAAGGACGATAATCCAACTCGAACAGGAAACAAGCGCAACTGGTAACCA  
 AACTATAAAAATGAATGATGATAAAAATGTAACAATTAACACAAGGGAAACCCCTCTGTAA

>YNL026W 0.67 Cold

ATGACCTCATCATCTGGTGTGATAATGAGATTTCTTAGACAGCCCGATGCCAATTTTCAA  
 TGAGAGTTCTACTTTAAAGCCAATTAGGGTTGCGGGTGTAGTAACAACAGGGACAGATCATA  
 TCGACCCTAGCGTACTACAGGCATACTTAGATGATACTATTATGAAATCCATTACTTTGGGG  
 CAGCTAGTGAAAAATGCGGATGTGTTAAATAAGAGATTGTGCCAACACCACATTGCCTTGAA  
 CGCCAAACAGTCGTTTCACTTCCAAGGCAATACATATATCTCCGATGAAAAAGAAACACATG  
 ATGTGGTGCCTTTGATGGAAGTTGTTTCACAATTAGATATATTACCTCTAAAACGTTTACA  
 GCGAAGACAGGGACAAATTTTGGGAACGATAATGATGCAGAGGCTTACTTACAATTTGAAAA  
 ACTAATAGATAAAAAATACTTAAAGTTACCTACTAGAGTCAATCTCGAAATTTTGAGAGGTA  
 CAAAAATACACTCCTCCTTTCTATTCAATCTTACTCTTCTCTTTCTCCCAATCAATTCTA  
 AACTTGAAAGTTTTTAGTCAATTTTATAATTGGAACACAAAATAAAGGATTAGATATTGGGCA  
 AAGAGGAGCAAGACTATCTTTGAGGTACGAGCCACTGTTCTTACATAAACTATTACACAATC  
 CGCATTTCTAATGAAAGTCCACGTTATTTTCATGAGTGGTTTTTAGAGACCTGCTGGAGATCC  
 ACTAAGATATGTTTCAAGGCACCTAGTGCGCCCTATATGTATTCAGGTACAATGTTATCTCA  
 AGCAGGCGATCAGTTAAGGACAATTTTGGGTCATACATTCGTGCTGGACAAGAGAGATCATA  
 TTATGTGCCCTACTAAGGGTTCGATGTTGAAGTGGAGTAATGAACTTTCGCCTGGAAAGCAT  
 TTAAAGACCCAATTAGAATTGAACAGTGTAAAAAGTTGGATGAATGACGACTTTTATTACTTT  
 TTCTACTACCATTAATAACAGGATATCTAAAGAACCTTATCCTCACAACAATCCTTGCCGTAC  
 ATATATGTGATAAGTTTTAGAGTGGTGGGCCAGCGACATTCGGGGGTTTCAAACATTTGGG  
 TTAGCCCCAGAGATTTATATGATGCAGTAGGTGGTGATGCTTTTGTTCCTATGGTCTTAG  
 CGTATTTTCTCGATTGCCCTGGAAAAAGTTGAAAAGTCAAACTTTAGGTTACATTGGTTTTT  
 TTAATGGGGGTAAATTTGGTTAATCATGACAATACGTCGTTGGGTAATTGCATAGGACAGCTT  
 TCAAAGGAACACTCCACATCCACAGGTATTGGTCTTGTACTAAGGCACCCAATGGCAAGATT  
 CGAGCTAAACTTTACTTTGCCTATTACCCTCACGAAAATGATTTGATAAGAAAAGGATTCC  
 AGTTTGGTCTTGGTCTGGCATTTTTATAA

>YHR197W 0.82 Cold

ATGTCAGAGGAATTTATCGCAGTTTCTACTTTGGCTAGAAACCTGGAAATTGCCAAGGGTAA  
 TGAGTTTCATACCATTTTGGCGACTTTAAGATCACCAGTTTATATCAATGAACAGCTGCTAA  
 AATCCGAATTGAGCTTTCCTTGTACAAAAATCCTAAAACCTATCAGATCAGGCAATGACTTT  
 GATCTTTGGAAAGGATGTACACCTCTGTTGTGACTTGCGCCTATAATCCACTGGTCTTATC  
 GACTCATGGAGGTCAATTGCTTGCTGCCATTTATTCCAGATTGGAACAGAAGACGGGTTTCT  
 ATTCTTCGGTTATTTCTTCATCACATGGAAAGCAGCTATTCAATACCCTTATTTCTTCTGTA  
 GCGATTATCATTGATTTAATGAAGAATAAACCTACGTTATCGAGAGAAGCACTGGTTCCCAA  
 ATTAAGGCTATCATTCCAACGTTAATTACATTTGTCTCAATACGAGCCCGAACTTGTCTAC  
 CAGTACTACAGAGGATATTGAAGAGAAACACTACAACATTTAAGCCATTTACCAACAAATTC  
 CGCACTGTGTTAATCAATTTAATCATATCAGACTATGCTTCTTTAGGCACCTAAGACGCAGAG  
 GCTTGTGTTGCGAAAACCTTGTCTTATTTGCATTTGCTGAAAATTCAGGTTAGTGATACTAGCG  
 ATGACGAACTCAAGCACATCACAAAATATATGCTGATTCTAATTGGAGAACAGGATTAATG  
 TCCATCTTATACAATTCAGCCATAATTCATTTATGTGGAGAAATCTTGGATTTTGAACA  
 AGATAATGAGCTGTATAAACTAATTAAGTTTACCGGTTATCGATGAATCCAATAACAAAG  
 AAGAATTTTACCCTCATTGAAATTAGACTTCAACGCACCTTTAACTTTATGGGAAATCCA  
 CAACGTTTGTCTTATTGGCTGACATGCTTGTGCTTTCATCTCTTTACCAACTCCCTTTCC  
 CATTCGAGTTCCGCTGGGTGGTATTAATTCCTTTGTGAAGTTTTGTTGGGAGTTAGTAACA  
 AATATTTACCCTTAAAAAAGAATTCGCTCATGATAATGAACTAAATGGGGTTCATCAATACC

ATCTTACCTCAAATACAATTTCAAGGCATTAGGTTATGGGAAATTATGGTTTCAAAATATGG  
CAAATGCGGTTTATCATTTCGAAGGAATCCTTTCCTCATTGAACTTTTCATTCCATTAA  
AAAAGAAAAGTAACAATGAAATTTGATTTTAAATGTTGTTGGGTCTTTAAAATTTGAGTTTGCT  
ACTGTTTTTCAGATTGGTAAATATGATTTTGTCTCATTAGGCCACCAACTGAACATAATCAG  
CGTCATATCCCAATTAATCGAAGTGGCGTTGTTCTTATCTCATGATAAAACATTGATTGATT  
CTTTATTCAAAAATCGTAAAAGCATCATGAAACAACAGACTAAAACAAAACAATCAAAGAGG  
AGTAAAAGTGCCGAAGGTGCATTTTCTGATATTTATACGCACCCAGAGCTATTTGTGTGTAA  
AAATTCATGAATTTGGTTCAATGAAATCAATGATTTTTTTTATTACTGCACATAAATAATTGGA  
TTTTGCCTTCAACTCCACATATTCAAATTTTGAATATAGTATCACGCAATCTTTAAGATTA  
AAGGAAAGATTTGGTTATATTCCAGAAAGCTTTGTTAATCTCCTGCGTTGCGAGGTTCTTCA  
CCCAGGTAGTGAACGTGTTTCAATTTTACCGATTGCAATATCACTATTAAAGAATATCAATG  
ATGATATGTTTGAATTAATGTTGTCATCCAAAAGTGCCAGTCGGTATGGTGTACCAGTTGCAC  
AAACCTTTGGACTTAGGCGAAGACGGGGAAGTAAGGGATGATATCAACAAGAAGGAGGTTGA  
AACGAACGAATCATCCTCAAACGCCAATACTGGCCTGGAGACTTTAAAAGCGTTAGAAAATT  
TGGAAAATGTTACAATCCCTGAACCCAAACACGAAGTCCCAAAGGTCGTCGATGATACTGCC  
ATATTCAAGAAAAGGTCAGTAGAAGAAGTCATTGAAAGAGAGTCTACATCTTCACATAAGAA  
AGTGAATTCGTTGAAGAAAACACCGTGGATAATGGCGAAGAATTGATTGTAAGAAAAGCTG  
TAAGCCAAACTAAGGAAGAAGAGAAGCCAATGGAGGACAGTGAAGATGAAGAACAGGAGGAG  
TTTGAATTTCCCGTATCGAATTAAGTGATGACGAAGAGGAGGAGGAAGAAGGAGAATAA

>YOR284W 0.82 Cold

ATGCAACAAACAAAATTTGGCAAGATGTATTTGGACCACGATTCGGTAGTTGAGTACTCAGA  
AGATGAAATTTGTCGAAGCCGATCGTATTACATTTGGGCTATAAAAAGAGATTGTCAATGATTG  
AAAATCAAATGCGACATCTTTTGGAGGATTTTAGTTTTGGACGTTTCAGCAGATTGAACCCATT  
CTTGCCGACTTGCAGAAGTACTACGACGCGTTTCTACAACCTTTTACAGAAAAGGAACAAATC  
ATTACAATGTAAGAGGTCCACTCACCAGCCGGTCCCATCCCAATGAATAGCCAGACATCAA  
CAAATGCAAAGGTTAATTTGAGCGGAAAGCTTATGAAGTTTCAGCTAAATAGTGTACAAAAG  
TTTCGACGAAGAAAATATACTAAGGATTCTGCAAAATAAAAATAGAATTCGAACATTATTTCCA  
AATTGATAAAGGTAAGAAGCAAAGGTGCTATTACTTTGCCGTATATCAATGCCTCAATGGGC  
CAACACGTTTTGCATAAAGTGCTTAATATTGAGGGAATTATACATAATAATAGTATCAGAACT  
ATACTGGGCAAACAAGTGTCCAGTTCTAAGTGGACAGTGTTCCTGTACGATGTAAAAGTAGT  
TTTATTGGCGCATAGACAAGATGTTCCGAACCTTAGAAACTAGCAAGATGATCGTCAGATATG  
GTGATTTATTTCCCTGTGCATTGTACTTCAAAGATCATACAGCATACTAA

>YNL211C 0.8Cold

ATGCCTCCAAGAAGTATAGAAGAATGGTTTTACTACAAGTTACTGAGTAGTCCAGGTTTCCA  
TAGATTTGTACGCAAGGTATATAGGAAAGTAAATGGTATTAAAGAAGATCCTTTCACTGACC  
AATCAACTGCTTTTCAATATCTTTATAAGCCAACCTCCACGACAGAAATTTAAGGCTTTAAGG  
CTTTTATTTTGGGATGAAATGAGATCTACTTTTGGGTTTCAGAAGGAGACTAGGAGACCGCTT  
TAAAAAAGATTAA

>YDR389W 0.79 Cold

ATGCCAAATAACTCTTAAACAAGGCTCCAAAATTGAAAATGTTTCTCCCTCTAAAGGTCA  
TGTCCCAAGTTTTTGGGAAGCAGTTCATAAACAACCCTAAGAGTATGTCATCCGAAAATATTA  
CAGTCCCTAGATCACCAACTTCTCTTTCAAGGAATGCTCAACCAACTACTTTAAAACGGCCT  
CCATTATCTTCAAGACCATATTCATATAATACCCCAACCAAAGATAGGAAATCCTTTTCCAA  
ATCCGCGAAACAGAACAATAACAACAACGCTAATTCCGGAACATCGCCTCACGCAGAGT  
TCAAAAATTACAGAGATATGTTTTTATCTAATAGAAATGGTTTTCACAGGTAGGGTTTTCGGT  
GTTACTTTTAGCAGAATCGTTGAGCGTCGCCAGTGCAGAGGTCATTGTTCAAAGTGAGTTGGT  
GAGTTTTGGTCGGATACCCATCGTGGTAGCCAAGTGCGGCGCATACTTAAAAGCAAATGGAT  
TGGAGACCTCGGGTATATTTTCGTATAGCGGGCAATGGTAAAAGAGTAAAAGCCCTTCAATAC  
ATATTCTCGTCGCCACCTGATTATGGTACCAAATTC AACGATTGGGAAACATATACAGTGCA  
CGATGTTGCATCGTCCCTGAGGAGATACCTTAATAATTTGGCCGAACCACTAATACCTTTAT  
CCCTATATGAACAATTCAGAAACCCGCTACGATCTAGACCAAGAATCCTAAGGCATATGTTG  
ACCCACGAAGTTTCTCATCCGAATGCGAATAAAACAATAATGTAACAGTAAAATCAAGTAG  
ACAGAACTATAATGATGATGGTGCTAATGATGGTGACATCGAAAAGGAGGACGCTAAAGATG  
ATGAAGAAAAAGACGAAGAAAAATACGTCATAAGAGAAGGCTGACCCGCGATATAAGGGCA

GCTATCAAGGAATATGAAGAGCTCTTTGTTACCTTATCAAATGACACGAAACAGCTAACTAT  
 ATACCTACTCGATTTACTGAGTCTTTTTGCAAGGCAATCACAGTTTAACTAATGTCTGGTA  
 GAAACTTGGCGGCCATCTTCCAACCTTCAATATTATCGCATCCTCAACATGATATGGACCCC  
 AAAGAATACGAGTTATCCCGACTAGTAGTGGAAATTTTTGATTGAATACTCGTACAAGCTATT  
 ACCCCATCTTTTGAAGTTGGCTAAAAGGGAACAACAGGAACGGTTGTCAACCGAAAATAAGA  
 AAAATAATGGAGATAAACAGAAAACCTGATCCTATAGAAAATACCAAAGATCACCTCATCGGAT  
 TCGCCACCAATAGTTTCTTCCAATAAAAAACCCACCGGCGATTGACAATAACAATAAACTAGA  
 CCATACGACGTTATCGCCAATATCTACTTCGATACCGGAGAACTCATCAGACCTACAGACTT  
 CAAAAATGTTAAAGCCTCCGAAGCAAAGAAGACCACACTCAAAATCGTTTGGTTCTACTCCG  
 GTTCTCCGGATGTTATTGCTAGTAATAAAAAGAAGAACGAGTTTATTCCCGTGGTTACATAA  
 ACCGGGAATTTTGAAGTGACACAGGAGACAATGGCGACTTAACTGCTACTGAAGCTGAAGGTG  
 ATGATTATGAAGAAGAAAATGTTGATCCATACGGTCAGTCTCCATCTAGCGTACACTCAGGT  
 TCTTTGCCCAAACAGCATTATCTGCCAATTCCTCGAATGAACAGATCGTTGAGTGGAAAACAG  
 TACCAATTCGTCTTTAACTAGACCTATTTCAATGATCCTGACCAGTGGTAATGATAATT  
 CCGCTGATCAATTAGAATTACTAAGTAACACTCATAGCAATAATGAGCGCAGTAATGCTTTA  
 CCATTAACCGAAGATGATGGGGATGAAAGAAAATCAAGATCACGCAAGAGGGAATCATGGTT  
 TCAAAGACTAACAGCCGTTTCCAGGCTCTGCTAACAGGGCTTGA

>YLL061W 0.78 Cold

ATGGATGAATTTGAATCTACCAAACCTTTCGAAGGTTTTCAGTTTTCCACTAGCGTGTAAAGTAC  
 GCCTTTCGAATGAAGGAAATAATCTAATACACAGATTCAAGAACTCTTTCAAGCGAAATGATT  
 CACCAGCGATCCAAGAAGGTTTGTGTATTTCGGAGCTTTCAGAGGAAGAAAAATACAATGG  
 GACTTAGCCAACCAGCCGTATAAAAAGGTCCTAGATCAAAGACACCTGACCATGATAGCCAT  
 TGGAGGTACTCTAGGGACGGGTCTTTTCATTGGTTTGGGGGAATCACTAGCGTCCGGACCTG  
 CTTCTTTGCTAATTGGTTTCTTGTGGTTCGGCGCATCTATGCTCTGTGTTGTTTCAGTGTGGG  
 GCCGAACCTTTCATGTCTAGTACCCTGTTTCCGGCTCCTATGCGCTGCACGCCAGTAGATTTAT  
 AGACCCATCAGTTCGGCTTTCAGTATAGGAATTACTACTTATTGATGTGGCTCATATCTTACC  
 CTAGCGAGCTGGTAGGATGTTTCGCTTACCATCTCTTATTGGGCACCATCGGTCAATCCTGCT  
 GCCTGGGTTGCAATCGCGTTCGTTTTAAGCATGCTATTGAATCTTTTTGGGGCAAGAGGCTT  
 TGCAGAATCAGAGTTTTTATATGTCAATTTTTCAAATTTGTGGCTCTATTCATTTTTATAATTA  
 TTGGTATTGTTCTCATTGCAGGTGGTGGCCCTGATTCTACTGGATACATCGGCACGAAGTAT  
 TGGCACGATCCAGGCTCCTTCGCTGTTTCTGTTTTTCAAAAACCTCTGCAATACTTTTTGTTTC  
 GGCAGCATACTCCTTTAGTGGTACAGAAATGTTTGTGTTTTAACAGCACTGAAGCAAGGAGTG  
 TTTCTCAGTCTCTCGGGCAGCGAAAGGTACGTTCTGGAGAATTATCATCTTTTATATTGTT  
 ACAGTGATTATAATTGGTTGCCTGGTCCCTTATAATGATCCTCGTCTGATTAGCGGTTTCATC  
 CAGTGAGGATATTACTGCTTCCCGTTTTGTTATTGCCTTGAGCAATACTGGTGTCTATGGGAA  
 CAAGAGTGTCTCATTTTTATGAATGCGGTCACTTTGATAGCCGTATTTTCTGTTTGCAATTC  
 TCGTTTTACGCATCCTCTAGATTGATTTCAGGTTTTGGCGACAGCAGGCCAACTTCCAAGAT  
 CTGCGCTTACATGGACAGGAATGGTTCGGCTTTAGTTGGCATGGCTATATGTGGCGCTTTTG  
 GATTGTTAGGCTTTTTGGTTGTTTCCAAGAACCAGGGTACAGTTTTTCACATGGTTGTTTGGC  
 TTGTGTTCCATTTCATTTTTCACTTGGTTCTGTATTGCTTCTGTCAAGTCAGATTTAG  
 GATGGCAATGAAAGCTCAAGGAAGGTCAAAGGATGACATTATCTATAGATCGACATTAGGGA  
 TATACGGAGGAATTTTCGGCTGTATCTTAAATGTTCTATTGGTAATTGGAGAAATATATGTA  
 TCGGCTGCACCCGTGGGTAGTCCAGTTCTGCTGCTAATTTCTTTGAATATTGTATGAGTAT  
 TCCATAATGATTGCTGTATATATTGGCCATAGAATTTACCGCAGAGACTGGAGACACTGGT  
 ACATCAAGCGGATGGATATTGACCTCGATAGCGGACATTCGTTAGAGGACTTCGAAGCCACC  
 AAGCTTGAGAGGGATGAGGATAAGAAATACGTTTCTCTAAGCCACTTTACTATAGGATCTA  
 TCGTTTTTTCTGTTAA

>YNR054C 0.82 Cold

ATGAGTGAAAAAGTAAATAGTGACTTTTGAAGACTTTTTCTCAGATGAGGAAACCGATCAACA  
 TAACGTCTTAATTCAGACCAAGAAAAAATTTCTAGTAAGGATGATATCTTCAGTAAGAAGG  
 TAGAAGACATCGAAAGTAAAAACGAGTCAGACATAGAAGAAGAGCAAAAACAAGAAGAAAA  
 GAGGATGTAGAACAACCAGATAAAGAGAATGGAGAAAAGCTCGATCGAGAAGTAGAAGAACA  
 AGCTTCGTCCACCCTTCACTGGATTTAAAAACAGAAAAACTAAGGCAACTGGTAAAAATCAA  
 AGGCCCGCAAGAAGTCTAAACACAAGACTGGGGTGGTATACTTCTCCAGTATTCACCTTAC  
 ATGAAACCTGCAAAAATGAGACAAATATTAACCTCGTTTTGGTGAGGTAGATAGACTATTTCT

AAAGAAAGAGGACGATCAAAAAGTACAAGCAAAGAGTTAAAGGTGGAGGAAACAAGAAAAACA  
 AGTATGAAGAAGGTTGGGCCGAGTTTATTAGGAAAAGAGACGCCAAATTGTGTGCGGAGACG  
 TTGAACGGGAACATTATTGGTGGCAAGAAAGGTACTTTCTACCATGATGATATCCTGAACGT  
 GAAGTACCTCCCAGGTTTCAAATGGGCAGATTTGACTGAACAGATTGCCCGCGAGAACGATA  
 TCAGACAGGCCAAGTTGGAGATGGAAATCTCGCAGGCCAACAACTGAACGCGGAATTCATT  
 AGAAACGTGGAGCAAAGTAAGATGATACAAAACATTAAGAACTCTAGGAAGCGCGCCGAAA  
 AGAAGGAGAGTCTGCAGATTCTCACCCCTCACAGGGAATTTAAACAACGTCGTGTGGAAACAA  
 GCCGTGCCAATGCTCCCTCTGATATCAAGCAGCAATCCTCTGGGTCCAAAGACTTGGGTAAT  
 GTTCTCACCAATTTACTATAA

>YGL250W 0.81 Cold

ATGAGTGAAGAAGAAGCGCATAAAAACAGTGGAGGTGGATGACGTCGGGGTTCAATTGGATGA  
 GGGCGATGAAGAAGACCTTTTGGAGTATGATGATGAACTCGTGGAGGAACAACCATCGGACG  
 CCCGTATACGCAACGTGGCAGAGACTTTAATGAAAAGCGAATTGCCCAAAGTCACCGTGGAA  
 TATAAAGATACTACATTTCTGTTGTTACGTCGGATGATAAGAACGAAAAGTAACAACCCCAT  
 AATATGTGAAAACGCTGCTCTTTATCAGCGACCCATGGGGGAATTCATGGAATCCATTCGTA  
 AATTTATGGGAAATCGTTTTGGCAGGTTGGCTTTTTGCTACGAAGGAGTTGGTTTTACAACG  
 AAAAGCCTCGATTTGACCTTGTTCGAAGATAATGTCTACAACAACCATATTTTCATTCAGCGA  
 TGTTTATACTATATTTAAAATCCTGAAGGAAAAGATCGGAGTCTAATTTTGAACGATATAC  
 CGACGCACTTGGCTATTGAATTAAGTACAAGGCCAAGATTTGTCTCTCGGTACAACGCCCTTG  
 GTTGAATTAACGAAAGCTCAGCTACGTTGAAAAACATAAAGCCATTTTCTAACGATGAAAC  
 GCATCCCTTAATTTGGATGACAATGACCAATATACACACCAGAATACTTCAGAAGTCATTTG  
 TAATGGACATAGATGATGACGTAGGTGAGGATTTCTGAAGACTAA

>YIL172C 0.79 Cold

ATGACTATTTCTTCTGCACATCCAGAAACAGAACCCTAAGTGGTGGAAAAGAGGCCACAATTTA  
 TCAAATTTATCCCGCAAGTTTCAAAGACTCCAACAACGATGGTTGGGGTGATATGAAGGGTA  
 TTGCCCTCAAGTTGGAGTACATCAAAGAGCTTGGTACCGATGCCATTTGGATCTCGCCATTT  
 TACGACTCGCCACAAGATGATATGGGTTACGATATTGCCAACTACGAAAAGGTCTGGCCAAC  
 CTACGGTACGAACGAGGACTGCTTTGCCTTGATCGAAAAGACACATAAAGCTTGGTATGAAAT  
 TTATCACCGACTTAGTCATCAACCATTGCTCCAGCGAACATGAATGGTTCAAAGAGAGCAGA  
 TCCTCAAAAACCAATCCAAAACGTGACTGGTTCTTCTGGAGACCTCCTAAGGGTTATGACGC  
 CGAAGGCAAGCCAATTCCTCCAAACAATTGGAGGTCTTACTTCGGTGGTCTGCATGGACGT  
 TCGATGAAAAGACACAAGAGTTTACTTGCCTTTGTTTTGCTCCACCCAACCTGATCTAAC  
 TGGGAGAACGAAGACTGCAGAAAGGCAATCTACGAAAGTGCCGTTGGATACTGGTTAGACCA  
 TGGTGTAGACGGCTTTAGAATTGATGTGGGAAGCTTGTACTCCAAGGTTGCTGGTCTACCAG  
 ACGCTCCTGTGATTGACGAAAACCTCAAAGTGGCAACTCAGTGATCCTTTCACAATGAACGGA  
 CCACGTATCCATGAGTTTCATCAAGAAATGAACAAGTTCATCAGAAACAGAGTGAAGGATGG  
 CAGAGAAATTATGACAGTTGGTGAATGCGACATGCTACTGATGAGACCAAGAGGTTGTATA  
 CAAGTGCCTCAAGACACGAACTTAGTGAGTTATTCAACTTTTCCACACTGATGTCGGGACT  
 TCGCCCAAGTTCCGTCAAAATTTGATACCATATGAACTAAAGGATTGGAAGTTGCCCTTGC  
 TGAACTTTTTCAGATACGTTAACGGAACGATTTGTTGGTCAACAATTTATCTGGAAAATCACG  
 ACCAACCTCGTTCAATTACCAGATTTGGTGACGATTCTCCCAAAAACCGTGTATTCTGTT  
 AAGTTGTTGTCTGTGTTGTTGGTGTCACTGAGCGGTACTCTATATGTGTACCAAGGACAGGA  
 ACTGGGTGAAATCAATTTCAAGAACTGGCCTATCGAAAAATACGAGGATGTCGAAGTTAGAA  
 ATAACATATGATGCGATCAAGGAAGAGCATGGAGAAAACCTCGAAGGAGATGAAGAGGTTTTTG  
 GAAGCAATTGCCCTTATTTCCAGAGACCATGCTAGAACACCTATGCAATGGTCTCGTGAGGA  
 GCCAAATGCTGGTTTTTCTGGTCCATAATGCTAAACCATGGTTTTACTTGAACGAGTCTTTCA  
 GGGAAAGGAATTAACGCTGAAGACGAATCCAAGGACCCCAACTCGGTTTTGAACTTCTGGAAG  
 GAGGCCTTGAGATTTAGAAAAGGCACACAAGGATATTACTGTGTATGGATATGATTTTGAGTT  
 TATTGATTTGGACAATAAGAACTGTTTCAGCTTCACAAAAGAAATACGACAACAAAACATTTGT  
 TTGCTGCTTTGAACTTCAGCTCTGATTTCGATCGACTTCACGATTCCAAACAATAGCTCATCG  
 TTTAAGTTGGAATTCGGAAACTACCCAAGAAGTGAAGTTGATGCGTCTTCAGAACATTGAA  
 GCCATGGGAGGGCAGAATTTACATATCTGAATGA

>YDR523C 0.69 Cold



ATGGAAGCAAAGAAATATCAATTAGGTCAAGAACCCTCCATCGAAGCTATATTCCATCCA  
 ATCATGTATTGGCAGAGGTAACTTTGGTGATGTGTATAAAGCAGTGGATAGAGTTACGCAAG  
 AAATTGTGGCAATTAAGGTGGTCAACCTGGAGCATTCCGACGAAGACATTGAACTGTTAGCA  
 CAGGAAATTTTTTTCTGGCGGAATTGAAATCTCCTCTTATTACAACTATATTGCAACAAT  
 GTTAGAAGATGTCTCTATGTGGATTGTCATGGAATATTGCGGCGGTGGATCATGTTTCAGATT  
 TACTGAAGCGAAGTTACGTCAACGGTTTGCCTGAAGAAAAAGTTTCCTTCATTATTCATGAA  
 GTCACCTTGGGTTTGAATAACCTGCATGAGCAAAGGAAAAATTCATCGTGATATCAAAGCAGC  
 TAATATTTTACTAAATGAAGAAGGTATGGTTAAGTTGGGTGATTTCCGGAGTAAGTGGCCACA  
 TTCGTTCCACTTTGAAAAGGGACACTTTTGTAGGAACGCCGTATTGGATGGCTCCGGAAGTT  
 GTTGTCTGCGAAGTTGATGGGTATAATGAGAAAGCAGATATATGGTCCTTGGGTATCACCAC  
 CTATGAGTTACTCAAGGGCTTACCCCATTAATCTAAATATGATCCTATGAAAGTTATGACTA  
 ACTTACCAAAAAGGAAGCCTCCAAAATTACAAGGTCCCTTTTCGGATGCAGCAAAGGATTTTC  
 GTAGCTGGTTGTCTTGTAAAAACCTGCTGATCGGCCATCGGCATATAACTTGTATCATT  
 TGAATTTGTTAAGAATATCACCATAACGAACTTGAAGAAGTATGTTGATCTAATTA AACAGA  
 AAAAGGTTTCAGGAGAGATATACAAAAGTTCCCAAATACCTCTTCAAAAATCGCTTGTATAAA  
 AACAGCAACACAGTGAGGGGAAAGGAATTTTGAATTTTGAATCGACAAGACTAAGCACAAAC  
 ACAATTTCCAAAGAGGAATTAATCTCCCATTAACACAAGACTCTCCAACATCATCTTTAAATA  
 TGGAAAGTCTTATTTACTTTCATGGGCAAACGTAAACGCCGATAACCAACCCAAGTTCTTCA  
 TCATTTAGAAAATGTACGCAACCAGTTTTTCGAGCTTGATTCAGGAATGGATATAGATTCAGG  
 CTGCCCAAATGCTCAAGCAGAGACCGAAATAGTTCTCTCTCTAATCATAATAAGAAGCATA  
 AAAAGAACGATATTCAGGCGTTGAAGATAGAAAAGTTTGACTACTTGA AAAACATTGTATCT  
 CATATTTCTCAACAGAATGTATGATCGTGC GCGCAGCATGAAACAAGAAAATACGTAAATGA  
 AATGTTAAAGCAATTCATTA AAAACTGAGGCAAACGTTCTGGATTTAATGAGGTTTTTATAG  
 AAGAGATCTCACTAAGAATTGAAGCAATAAAGAAAGGATTCGTTTAA

>YIR004W 0.8Cold

ATGGTTGTTGATACTGAGTATTACGATTTGTTAGGTGTGTCTACCACTGCATCTTCCATTGA  
 AATAAAAAGGCCATATAGAAAAGAAATCTATTCAAGAGCATCCTGATAAGAATCCCAATGACC  
 CCACGGCTACCGAAAGGTTTCAAGCAATATCCGAAGCTTATCAAGTTTTAGGTGACGATGAT  
 CTTTCGCGCAAAGTATGATAAGTATGGAAGAAAAGAAGCTATTCCTCAGGGCGGCTTTGAAGA  
 TGCAGCTGAACAGTTCTCTGTCTATCTTTGGTGGAGATGCGTTTGCCTCATATATTGGCGAAC  
 TGATGCTATTAAGAACCTACAGAAAAGTGAAGGAGCTAAATGCTGAAGACGAAGCTGAAAAG  
 GAGAAGGAGAATGTGGAACAATGGAAGAATCACCTGCAGACGGTAAGACGAATGGCACCAC  
 TAACGCTGTTGATGCAGCATTGGGCAATACTAACGAAAAGATGACAAAAATAAGGCGAGGA  
 CAACTTCTGGTAATTTAACTGTACACGATGGAACAAGAAAAATGAGCAGGTAGGAGCAGAA  
 GCTAAGAAGAAGAAGACAAAATTAGAGCAGTTTGAAGGAAGAACAAGAGGTAGAAAAGCAAAA  
 AAGAGTAGACCAATTAAGCAAAACATTGATTGAAAGATTATCGATATTAACAGAAAGTGTCT  
 ATGATGATGCATGTAAAGATTCTTTTAAAAAAAAGTTTGAAGAGGAAGCCAATCTTTTAAAG  
 ATGGAATCATTTGTTCTGGACATATTACACACAATAGGCGACGTTTACTACGAAAAGCTGA  
 AATTTTTCTTGCATCCAGAACCTGTTTCGGAATGGGTGGTATATTTTCATTCTATGAAGGCTA  
 AAGGGGAGTATTTATGGATACACTAAGAAGTGTTCGGCAGCCATAGACGCTCAGAATACT  
 ATGAAGGAGCTTGA AAAAATGAAAGAAGCTAGCACGAATAATGAGCCTTTGTTTGACAAAGA  
 CGGAAATGAGCAAATTAAGCCAACCACTGAGGAACTGGCGCAGCAAGAGCAGCTATTGATGG  
 GCAAAGTATTGTCGGCTGCTTGGCATGGTTCTAAATATGAAATAACATCCACTTTACGTGGC  
 GTTTGTAAAAAAGTACTAGAAGATGACTCGGTAAGTAAGAAAACGCTTATCAGAAGAGCTGA  
 AGCAATGAAACTATTGGGTGAAGTCTTTAAGAAAACCTTCAGAACCAAAGTCGAACAAGAAG  
 AGGCACAGATCTTTGAAGAACTTGTAGCAGAAGCTACAAAAAGAAGAGACATACATGA

>YOR026W 0.8Cold

ATGCAGATAGTACAAATTGAGCAGGCCCCAAAAGACTACATAAGCGACATCAAAAATAATCCC  
 TTCCAAGTCACTGCTTTTGGATTACGTCTTGGGATGGCTCTTTAACAGTCTACAAATTCGACA  
 TTCAAGCAAAGAATGTTGACCTTTTACAATCGCTACGATATAAACATCCGTTATTGTGCTGC  
 AATTTTCATCGACAATACCGATCTGCAAATATACGTGGGAACGTACAGGGTGAAATTTCTAAA  
 AGTTGATTTGATAGGTAGTCCAGCTTCCAAGCTTTGACGAACAATGAAGCCAATTTGGGTA  
 TTTGCCGAATATGCAAATATGGAGACGATAAACTCATTGCCGCGTCATGGGATGGCCTGATA  
 GAGGTTATCGACCTCGCAATATGGTGATGGAGTTATTGCTGTTAAAAATTTGAACTCTAA  
 TAACACAAAGGTGAAGAATAAGATATTTACTATGGATACAACTCCTCTCGATTGATCGTTG

GTATGAACAATAGTCAGGTTCAATGGTTTTGCCTGCCACTCTGTGAGGATGATAACGGAACA  
 ATTGAAGAATCAGGACTGAAGTACCAAATAAGAGATGTCGCTCTTTTACCGAAAGAACAAGA  
 AGGTTATGCATGTAGCAGCATTGACGGGCGAGTTGCTGTGGAGTTTTTCGATGATCAGGGCG  
 ATGATTACAACCTCAAGCAAAAAGATTTGCATTTAGATGCCACCGTTTTGAATTTAAAAGATACA  
 AACTTAGCGTATCCAGTAAATTTCTATTGAATTTTCCCCCGTCATAAGTTCCTATACACGGC  
 TGGCTCTGATGGCATAATTTTCATGCTGGAACCTACAAACCCGCAAGAAAATAAAAAATTTG  
 CCAAATTTAACGAAGACAGCGTGGTTAAAATTTGCTTGTTCGGACAATATTTCTATGTCTGGCA  
 ACTTCTGATGATACTTTCAAGACAAACGCCGCAATTGACCAAACCTATTGAACTAAACGCAAG  
 TTCAATATACATAATATTTGACTATGAGAAGTGA

>YBR195C 0.79 Cold

ATGAATCAGTGC CGAAGGACATAACTCATGAAGCCTCCAGTATACCCATCGATTTGCAAGA  
 AAGATACTCGCACTGGAAGAAAAACACTAACTACTTTATGATTACCTAAACACGAATTCAA  
 CAAAGTGGCCGTCCTTAACGTGCCAGTTCTTTCCCTGATTTAGATACCCTTCGGATGAGCAT  
 CGCATCTTGTATCCTCATTACATCTTCCCAAAAACCTGAAGATGAGACCATATATATTAG  
 CAAAATATCCACGTTGGGTCATATAAAATGGTTCATCTTTAAATAATTTGACATGGACGAAA  
 TGGAAATCAAACCGGAGAAGTTCGACAAGGTTTCCCTCCAAACACTTAGTAAATGACATCAGT  
 ATTTTCTTCCCAACGGGGAATGCAATAGGGCAAGATATTTGCCTCAAAAATCCAGATATTAT  
 AGCCGGCGCCTCTTCAGATGGTGCAATCTACATATTCGATAGAACAAAAACACGGCTCTACTA  
 GAATAAGACAGTCCAAAATTTACATCCCTTTGAGACAAAAGCTGTTTGGTTCACATGGTGT  
 ATTC AAGACGTGGAGGCAATGGATACTTCTTCGGCAGATATAAATGAGGCGACTTCTTTAGC  
 CTGGAACCTTGCAAGCAGGAGGCCCTTTTACTTTCTTCTCACTCCAACGGCCAAGTTCAAGTTT  
 GGGACATTAACAATATTTGCATGAGAACCCTATAATAGATTTACCCTTAGTGTCAATAAAC  
 AGCGACGGAACAGCGGTGAATGATGTAACCTGGATGCCAACACACGATTCCCTCTTTGCTGC  
 TTGTACTGAAGGAAATGCGGTCTCCCTATTAGATCTGAGGACTAAGAAAAGAGAAGCTCCAGA  
 GTAACCGTGAAAAACACGATGGTGGAGTAACTCCTGTAGATTTAACTATAAGAACTCTTTA  
 ATTCTAGCATCTGCAGATTC AATGGGAGGCTAAATTTATGGGATATTAGAAACATGAACAA  
 AAGCCCAATCGCTACCATGGAGCACGGTACTTCCGTTTCAACTTTAGAAATGGAGTCCAAATT  
 TCGATACTGTATTGGCAACGGCTGGCCAAGAAGATGGGTAGTCAAGCTATGGGATACCTCC  
 TGCGAAGAACTATATTTACCCTGGTGGTTCATATGCTCGGTGTGAACGACATTTTCGTGGGA  
 CGCTCATGACCCCTGGTTAATGTGCAGTGTGGCAAATGATAATTCAGTTCACATATGGAAAC  
 CTGCAGGAAACCTTGTGGACATTCGTGA

>YPR001W 0.79 Cold

ATGGTACAAAGGCTTCTACCGGGCGCACATATATGCAGAAGGTCCTTCAATTCGTCTGCAAT  
 TATAAAGTCTTCTGCATTGACTCTCAAGGAAGCATTAGAAAACGTGATACCTAAGAAAAGAG  
 ATGCTGTGAAGAAATTGAAGGCCGTGTATGGCAGCACGTTTGTGCGACCGATTACCATTTCA  
 TCAGTTCTAGGTGGGATGAGAGGTAATCAGTCAATGTTTTGGCAAGGAACATCATTAGATCC  
 CGAACATGGCATTAAATTTCAAGGTTTAAACGATTGAAGAATGTCAAAAATAGATTACCTAATA  
 CAGGTATTGATGGCGATAATTTCCCTGCCAGAATCAATGTTATGGCTGTTGATGACAGGTGGT  
 GTGCCAACTTTCCAGCAAGCTGCTTCTTTCAGGAAAGAATTGGCTATTTCGTGGAAGGAAATT  
 GCCACATTATACAGAGAAAGTTTTGTCAAGTTTACCCAAAGATATGCACCCTATGACCCAAC  
 TTGCAATTGGTTTAGCATCAATGAACAAAGGATCCCTCTTTGCTACAACTACCAAAGGGC  
 CTCATAGGAAAGATGGAATTTTGGAAGATACTCTTGAAGATTGCTAAATTTAATTGCTTC  
 ACTCCCGCTGCTGACTGGGAGAATTTATTGCAACATTACAAATGAGGGACACCCATTAGGTC  
 AATATAGTGAGGAGGTGGATTGGTGTACAAACATATGTTCCCTGCTCGGCATGACAAATGGA  
 ACGAACTCTTCTAATACATGCAACCTTACTTCCCAGCAATCCCTGGACTTCATAAACTTGAT  
 GCGGTTATATAACCGGTATACATGTAGACCATGAAGGTGGTAATGTTTCTGCTCACACCACC  
 ACTTGGTTGGAAGTGCCTTGGAGTACCCGATCTCAGCTATTCATCTGGAATAATGGGATTA  
 GCGGGTCTTTGTCATGGGTTAGCAGCACAAGAAGTAGTAAGGTTTCTCATAGAGATGAACTC  
 TAATATTTCCAGCATTGCACGAGAACAAGAAATCAAAGATTATCTTTGGAATAATTTGAATT  
 CAAACCGTGTGATCCCCGGTTATGGGCACGCAGTTTTTGCCTAAACCGGATCCCTCGATTTACA  
 GCAATGCTTGAATTTGCGCAAAAAGAGGCCTATTGAATTTGAGAACGACAAGAACGTTTTGTT  
 GATGCAAAAATTTGGCAGAAATAGCGCCTAAGGTTTTGTTGGAACACGGAAAGAGTAAGAATC  
 CATTTCCCAATGTTGACTCTGCATCGGGGATTTTGTTTTATCATTATGGAATCAGGGAATTA  
 TTATTTCTTACCCTCATTTTTGGGTGTTCAAGGGCCATGGGACCCTTGACACAACCTGTTTTG

GGATCGCATTCTAGGTTTACCAATTGAAAGGCCCAAGAGTTTGAACCTTGGAGGGTCTGGAAG  
CACTTACCAAAGCAAGCAATGTTAACAAGTTGTAA

>YOR113W 0.71 Cold

ATGCCTCCTCCAACCTGCACAGTTCATGGGCCCTACGCAGGCGGGACAAAATGAAAGCCAAAA  
TCAATCATCAGGCGAAGCTGGGGAGCAAAACCAGGAGCATGGGCAAGGCCCTACTCTATTTC  
TTAATCAAAGTCAACCGGCTTCTTCTCAACCGCAACATCAACAACAAAGGAATGAGTCGATT  
TCATATTATACAAATTTCAACCAGCCACGATATTCCACGGACGCCTCTATCAACTCATCTT  
GAACATATCTGATAACGTACCAGTAACAAGTACAGGAGGACCTAGTTCTGGCGGCGCCTATT  
CCAATCTTCCACGATTATCCACTTCAAGTACACATCAACCGCCAGACCTGTCGCAAATCGGA  
CGCGGCTTTTCCATTGTAAACAACCTCTTCCCACAACAACAGCAGCTTCAAAATCAGCATCG  
GCAACAGCAGCAACAACAACAACAGCAGTCGCACCAGCAGCCTCCCTTCAAGACCCCTTCAT  
TTTCGACGGGATTAACGGGAAGTTCTTCTCAATATCAATTTTTTACCAAGAAATGATAACT  
TCGCAGCCACCTTCAAAAAGAACTCTGTTTATCTTGGACCTAATGATGGGCCTGATTTTGA  
ATTTTTTCAGTATGCAGCAGTCACAGCAACCGCAGTTCCAGCCTAGCAGTAGAAGAGAATCAA  
ACTCTATGAGACCTCCACTGTTAATACCTGCAGCAACTACTAAAAGCCAGTCCAATGGCACC  
AATAATAGTGGGAATATGAACACAAATGCAGATTATGAATCATTTTTTAATACTGGTACAAA  
CAACAGTAATTTCTAATCAGAACCCTACTTTTTGAGTTCAAGAAATAATTTCTTTGAAGTTTA  
ATCCTGAAGATTTTCGATTTTCAATTCAAAAGCGGAATTTCTTTTGTAGAGGTACTTTGGAC  
CATAGCAGCCAAAATGCGTTTTATACCTGAATCAAGATTTAACTCACTATCCGTTAACAACAA  
AGCTAATGGTGATCCTGTGCGGATAATGTTACCAATAACATGAAAGGAAAAAGTAATGAAG  
TTGACAATGATGATGGCAATGACAGTAGCAATAACAATAACAACAACAACAACAACAACA  
AATGAAAACAACAATGACAACAATAATGATAATAACGACAATAGTATTAATTTCCGCCACCAG  
TACTAATATCCCAAACCAAGAGGACCATAGCCTTGCTTCTACCGATAACCACAAGCAATAGTA  
GGAAAGATCTAAAAGAAATAGAACAAGACTTCGAAAACATTTGAATGATGAGGATAATTAC  
TCTAGTGCTATATCAAGACCATTGGATAAAAACGACGTAATTTGAAGGCAGTGAGGGATTGAA  
CAAACATATAGACGAGTCTGGTATGCAACCTAATATTATCAAGAAAAGGAAAAAGGATGATT  
CTACTGTGTACGTCAAGAATGAGATGCCCGTACTGATCCCCGATGAGTAAAGACAATTTCT  
ACTTCTGCTGAAGGAGCAGCAATGGCAAACCTTTTCTGGTAAAGAACCTCCTATACCTGACAT  
AAGTTCAGTAAGTGATGATGCTACTAACCTGATAGGTGCAACAAGGTCGACCAACTAATGT  
TGATTTATTCAAGCAAGAAAGAAAGTTTTACGGAGAAAGTAAATACCACTCAAGATGGAGAC  
TTACTGTTTTAACCAAACGATGGACATTTTACCACCTAAAAGCGAACTAGTAGGTGGTGTGGA  
GAAACCAAAGGCACACAAAATACACGAGCAGTTAAAAAACATGAATGTCCCTATTGTCATC  
GGCTTTTTTTCGCAAGCGACTCATCTGGAGGTTACGTTTCGTTCTCATATAGGGTACAAACCA  
TTTCGTTTTGTGATTATTGTGGCAAACGTTTTACTCAGGGTGGGAACCTAAGAACTCATGAACG  
ACTACACACAGGTGAAAAACCGTATTCATGTGATATTTGTGATAAAAAATTTTTCTAGGAAAG  
GGAACCTTAGCTGCTCACTTGGTTACTCACCAAAAATTGAAACCATTTGTTTGAAGCTTGAA  
AACTGCAACAAGACCTTCACTCAACTAGGAAATATGAAGGCCCATCAAAATAGATTTTCATAA  
GGAAACATTTAAATGCCTTAACGGCAAATTTAGCTGAGATGAATCCATCTGAGAATATTCAC  
TTGAAGAGCGGCAACTTTTTGGAGTACTTTGCGTCCATTTATAAAAATTCAAACAGGGGAATT  
AAAGGTAGAGGAAAAGGTGTAGGAACCAAAAAATCAACAATTTCTCACCAGAAAACCATCC  
TGCGAGCACAATTTTGAATCCAAATACAAATGCAAATAATGCTATTGCTAATGATTCTGAAA  
ATAACGGCAACCCTGAAGGTAACATTGACAGCAGTAGTAACAGCAATCCGGGCTCACATAGT  
ATGATTTCCGGACGCAAAAAGACATGGGTACGTTGCAATCACAATTTATCCAAAATAATTT  
TAACAATTTCTGTGAACAGTTTCAATCCGTCCAACCAACCAATCATAAACTACAATTACACCA  
CACTTCCTCATCTAGATTAGGAAGTAGTAGTTCCAGCAATACCAACAATAATAACAGCAAC  
TTTTTCGGTAGGTGCAGCTCCGGGTGTATTAATGGCGCCAACCACCAATAATGACTTCAGTTT  
CAACTTGGATCAATCTAATGATAATGAAAGATCTCAACAAGAACAAGTGAGATTTAAGAACA  
TTAATTACAAAAGCTAG

>YLR388W 0.79 Cold

ATGGCTCACGAAAACGTCTGGTTCTCTCACCCAAGAAGATACGGTAAAGGCTCCCGTCAATG  
TCGTGTTTTGTTCTTCCCACACCGGTTTGATCAGAAAGTACGGCTTAAACATCTGTCTGTCAT  
GTTTCAGAGAAAAAGCTAACGACATTGGTTTCAACAAATTCAGATAA

>YFL047W 0.81 Cold

ATGCTATCATTTTGGCGACTATTTTGGTCTGAAGACCTTGTCTCAGGTCTAGATGTGCTTTT  
 TGATAGATTATACCATGGTTGTGAGCAATGCGACTTGTTCATTCAATTATTTGCGTCAAGAA  
 TGCAATTTGAAGTCAGTCACGGGAGGCAGTTGTTTGGTATAGAAGCCGGTATGGACAATCTG  
 AAGGCAGTGCAGGAAGATGAAGATGAAGGGGTGACAGTTTCGAGGGCCCTGAGGGGAATTCT  
 ACAGGAAATGTCTCAGGAAGGGACGCATCACTTGACAATAGCGTCGAACATAGAAAGTTTGG  
 TGCTGCAGCCATTCAGTAAATGGTGCATAGAACATAGGGAGAGAATTCAATACTCCGAGAAG  
 ACTTGTGACCAATGTAAATAATTTAGGAAGTCTAAAAAGTACGTCCGTAAGCTGGAGAA  
 GGAATATTTTAAATAAATGTAGGCAGCTAGAAGAATTTAAAAGAACTCATTTCAACGAAGATG  
 AGCTAGCAAATGCAATGAAATCATTGAAAATACAAAATAAATACGAAGAAGATGTGGCCAGG  
 GAAAAGGATCACAGATTTTCAACAGGATAGCGGGAATAGATTTTGTATTATAAGACAATGAA  
 GGAGACGCTTCAGCTGTTACTGACCAAGCTTCCTAAAACGGACTATAAGCTACCTCTCATTA  
 GTTATTCTTTGAGCAACACCAACAATGGTGGAGAAATAACGAAGTTTCTGCTTGACCACATG  
 TCGTTAAAGGATATTGATCAAGCTGAAACGTTTGGCCAAGATTTGTTGAATTTAGGGTTTTT  
 GAAATATTGCAACGGTGTGGTAATACATTTGTCAACTCTAAAAAATTTCAATACCAATGGA  
 AGAATACCGCGTACATGTTTGGCAATGTGCCAATGCCCGGTTTCAGAGGAGCCTACCCTGGT  
 GAATCCTTAATATCCCGGTTCAACAACCTGGGATGGTTCATCTGCAAAGGAAATTATTCAATC  
 CAAGATTGGTAACGACCAGGGGGCAGCGAAGATCCAAGCTCCGCATATATCCGATAATGAAA  
 GGACGCTTTTTCAGAATGATGGATGCGCTTGCAGCGTCAGATAAGAAGTATTACCAGGAGTGC  
 TTCAAGATGGATGCCTTGAGATGCTCGGTTGAGGAGTTGTTGATTGACCATTTGTGCTTTAT  
 GGAAAAATGTGAGTCCGATAGACTGAATGCGATCAAGAAAAGCGACACTAGATTTTTGTTCTA  
 CCTTGGGTAACAAGATTTCTTCGTTAAGACTGTGCATAGATAAAAATGCTCAGCTAGAAAAC  
 GATATTGATCCCCTGCAGACCTTTTTCGCACTTTTAGTTAAGTACAAGACGGGCAGTTTCAA  
 GCCGCAAGCCATTGTTTATAATAATTACTACAATCCTGGTTCATTTCAAAACTTTGGTGTG  
 ATCTAGAAACTCGTTGTAGACTAGACAAGAAAGTCGTTCCGTTGATAAATTTCTTCGATATTC  
 TCATATATGGACAAAATATATCCTGACTTACCTAATGATAAAGTAAGAACTTCAATTTGGAC  
 TGATTCGGTGAAATTAAGTTTAAACACATCAGCTTCGAAAACCTATTGAACAAACAACAGTTCC  
 ACAACGAAGGGGAAATATTTGATATACTTTCTACGTCCAAGTTGGAGCCAAGCACCATCGCC  
 AGTGTGTTTAAAATTTATTTATTAGAATTACCAGACCCACTAATTTCCCAATGATGTCTCTGA  
 TATTTCTCGGGTGCTTTTACCTTGACTATCCACCTTTAGTTGAAACTGCGTTGCAAAAATTTA  
 CATCATCTCCCGAGAATCAGCAGGACGATGACAACGAAGAAGGCTTTGATACCAAGAGAATA  
 AGAGGCCTTTATACTACTCTGTCTCTTAAGCAAACCACACATAGCGACACTAGACGCTAT  
 TACAACCTATTTTACAGATTAATTTAAAATTTCTGAAAATGGGAGAGAACGGTAATGAAGTAG  
 CAGATGAGTTTACCGTCTCAATTTCAAGAATTTGCCAATTTGTATTATCCAGTCAAAGATC  
 ACCGATGATAATGAAATTTGGTTTAAAGATTTTCTATGATCTACTGACACATAAGAAACAGAT  
 TTTTACGAATTGAAAAGGCCAAAATTTCAAAAAATTAG

>YLR131C 0.72 Cold

ATGGATAACGTTGTAGATCCGTTGGTATATAAATCCCTCAGGCTTCGCGAAAGACACTCAAGA  
 TGAGGAGTATGTTCAACATCATGATAATGTCAATCCTACCATACCCCCACCCGACAATTATA  
 TTTTGAATAATGAAAACGATGATGGCCTCGATAACTTGTTAGGTATGGACTACTATAACATC  
 GATGACCTGTTGACTCAAGAGTTAAGAGATCTGGATATTCCTTTAGTGCCTTCTCCTAAGAC  
 GGGCGATGGTTCTTCTGATAAAAAGAATATTGATAGAACTTGGAACTTGGTGTGATAAACA  
 ACAAGTCTCCCACTATAGCAAAAATCAATGTCTCACACAAGAGAGGTCTAAGTGGCACA  
 GCGATATTTGGATTTCTCGGCCATAATAAGACATTGAGTATTTCCAGTTTACAGCAATCCAT  
 TCTAAATATGTCTAAAGATCCGCAACCCATGGAACCTATAAATGAATTGGGTAATCATAATA  
 CGGTAAAAAATAACAATGATGACTTTGACCATATAAGGGAAAATGATGGTGAATAATAGCTAT  
 TTGAGCCAAGTTTGTGTTGAAACAGCAGGAGGAGTTAAGAATTGCTCTTGA AAAACAAAAGGA  
 AGTGAACGAAAAATTTGGAGAAGCAGTTGAGAGACAATCAAAATACAGCAAGAAAAGTTGCGTA  
 AAGTATTAGAAGAGCAAGAAGAGGTGGCGCAGAAGTTGGTTTCTGGGGCTACAAATTTAAT  
 TCCAAACCTGGATCTCCAGTAATACTAAAGACACCTGCCATGCAAAACGGTAGAATGAAAGA  
 TAATGCTATAATCGTCACAACGAACTCTGCAAATGGCGGATATCAATTTCTCCTCCGACGT  
 TAATATCGCCTCGGATGTCAAATACTTCAATAAATGGTTCACCATCCAGGAAATACCATAGG  
 CAACGATATCCAAATAAAAGCCCAGAAAGTAATGGATTGAACCTTTTTTCTCCTAACAGTGG  
 TTATTTGAGAGATTTCTGAACTGCTTTTCAATTTCTCCACAAAATTATAATTTAAACTTGGACG  
 GCTTGACTTATAATGACCATAATAACACCAGTGATAAAAACAATAATGATAAAAAAATAGT  
 ACTGGTGATAACATATTCGGTCTGTTTCGAAAAGACTTCCCGGGTGGGCTAAGTATCTCTCC  
 AAGGATAAATGGAAATAGTTTGGAGATCGCCCTTCTCGTCCGCACAGATAAAAGCAGGGATG

ATCGATATGCTGCTGGCACGTTACGCCTAGAACACAGTTGTCACCTATCCACAAGAAAAGG  
 GAATCCGTAGTTTCCACGGTCTCGACAATATCACAACCTGCAGGATGACACTGAACCCATCCA  
 CATGCGAAATACCCAGAACCCAACATTAAGAAATGCAAACGCTTTAGCGTCATCAAGTGTAC  
 TACCTCCTATTCTGGTTCCAGCAATAACACTCCAATTAAGAATTCTTTGCCACAAAAACAT  
 GTATTTCAACATACTCCCGTCAAAGCTCCACCAAAGAACGGAAGTAACCTAGCTCCGCTTCT  
 AAATGCACCGGATTTAACAGATCATCAGTTAGAAATTAAGACACCCATACGAAATAACAGTC  
 ACTGTGAAGTGGAAAGCTATCCGCAAGTACCACCTGTCACACATGATATTCACAAAAGCCCC  
 ACTTTGCATAGTACGTCTCCTTTACCAGATGAAATAATACCTAGGACTACGCCAATGAAAAT  
 AACCAAGAAACCAACTACTCTGCCTCCGGGTACCATTGACCAGTACGTCAAGGAACTACCCG  
 ACAAACTATTCGAGTGCTTATAACCCTAACTGTAACAAAGTATTCAAGCGTAGATACAACATA  
 AGGTCGCATATTCAGACACATTTGCAAGATAGACCGTATTCATGCGACTTTCCCGGTTGCAC  
 CAAGGCGTTTTGTTGCAATCATGATTTAATAAGACACAAAATCTCCATAATGCCAAGAAAT  
 ACATCTGCCCATGCGGAAAGAGATTTAATAGGGAGGATGCTCTAATGGTGCATAGAAGTCGG  
 ATGATTTGCACCGGCGGTAAGAAATTAGAACATTCGATCAACAAGAAACTTACATCTCCCAA  
 AAAAGCCTGCTTGACAGCCCGCATGACACAAGTCCCGTAAAAGAACTATCGCCCGGGATA  
 AAGATGGGAGCGTCTAATGAAAATGGAGGAACAGCTGCGAGATGATATGCGCAAACATGGA  
 TTAATGATCCACCCCATCCACAGCAGCGCAGGCAAAACTCGAACCAGCACCCTTTCAA  
 CGAACTGATGCTCTCTGA

>YDR359C 0.75 Cold

ATGTCCTCACGTCCAAGTTCAGCAGTGCCTAATTCAGCATCACTCAGTGAGGACCAGAGCAG  
 TGATAGAAGTAAATTTTCTAAGGCAGATGACTTAATTGATGAAAGAGATAGAAAACCTGACCG  
 AACTATACTGCGTATCCCGCTTGAACCAGCTGCTAGAGTTAACAGATGAAAACAACTTCGG  
 AAGGAAATAGATGCATTTTTTAAAGAAAAACGATATACGAAGGGGTATAAGGTTTGACGAGGC  
 GTCAC TGCCGAAAGCTCTACATACAGCTGCGACTCCCATACAAAAAGAAATTGAAGGATG  
 TAAATTTAATAAATGTACCTAACAGAGGCTATCCGATTCTAAAATGAGTAGGGAAC TGCCA  
 GAAAATAGCGAAAATGTATCAGTCAAATCAGAGAGTCATTTTGTTC AAGCCACGATAATTC  
 AATCCGTGAAAATATGATGGATTCTTTGAGGCCAGCTGAAAAGACAGGAGGTATGTGGAACA  
 AAAGGCCACTTGAGTCAACTATGGGAGGTGAAGAAGAGCGACATGAAAAAGACAGAAAGATG  
 CAATCTCAGTCATTGGAATCTTCTAATAATTCGGAATGGCTTCATTACCTATTTTCGCCGCG  
 TCCCCCAGTGCCTAATGCATTAGCACACTACACTTATTATGAGAACATCGAGTACCCACCAG  
 CAGATCCCCTGAGGTGCAACCTGCAGTAAAATTCAAGGATCCGTTGATAAAGAACATTATG  
 GCGAAAGAGATAGATACATCAGACCATTATAACGAGAACAATGTTGACGCATTAGAGACCGT  
 ATTTTTATTAATGAACGATTATATACCATCGAAAATACCCAGGCTTTGCCCTTAGCAGAAT  
 TGAAGTACATGTCACAACTCTGCCTCTTATTAATCTAATACCGAGAGCTCACAAGGCTTTG  
 ACCACTAATATTATAAACAACGCCTTAAACGAGGCCAGAATTACTGTTGTTGGCTCGCGAAT  
 AGAAGAACTAAGAAGACTTGGAATTATGGTCTTTAAGACAACCTAAAAGATTCATCGATCCGT  
 GGAAACAACACAATACGCATCAAACATACTTTTAGAAGAAGCTAAATGGATGCAAGCAGAT  
 TTTAAAGAGGGCCACAAATATAAAGTAGCTATCTGCACAGCAATGGCACAGGCAATCAAGGA  
 CTACTGGACCTATGGGGAATATGCTGTGTAAAACGTAAAACACTTCTACCTGGTAAGGAAA  
 ATAAATTATCTGACGACGGGCGCATATCTGAAAAGTCCGGTAGACCATCGGATACTTCAAGA  
 AATGATTCCGATATTAGCATAGCCGGTAAGGATGACATTGGAATTATTGCGAACGTTGACGA  
 TATTACTGAAAAAGAAAGTGCTGCTGCTAACGATAATGATGAGAATGGAAAGAATGAAGCAG  
 GAGCTAAGAGTGATTTTGATTTGTCAGATGGTTTGTTATCTCAAGAAGGTGCCACGATCAA  
 ATTATATCTTCTATTGACACCAAGTTACTTCTAAAAAGCCATCCTCCTCAAGCGAAGTTGT  
 TTTAATAACAACATGAAGTAGCTGCATCATCAGCGTTGATCGAAACCGAAGAATCAAAGAAAG  
 AGCTAGCCCCCATTTAACTTTCAATCTTTGTTGACGAACTCAATACTTTTGAAAAACA  
 TTAATACAGGATTTACCGCTGTATAATGGTATTAATGAAGAACGGCCAAAAAAGATGATTC  
 TTTACCATTTATTTCAAATTTCAAATCGGTAGTGTCACTGGATGATAATGGATTTTATAAGT  
 TACTTGAGCGTCAATTGATTGACGAAGAACCATCAATATCACAATTGAGCAAAAAGGCGGGGT  
 ATGTTCTATGGTAATAGAAGAAATCATTATTTAAGACCACCAGCAGTACCTTCATTACGCTA  
 TCTTCAAAATAGAACCAGACTATATGGCTGTCTGAGGACGATCAGGAACTGGTCAAAAATA  
 TTAACACATATGGCTACAATTGGGAATTGATTAGTGCACATATGACACATCGCCTCACATAT  
 TCTTATTTATCGAATATTGAACGTAGAACGCCATGGCAGTGTTTTGAGCGTTTTGTACAATT  
 AAATGAACGATTC AATTTTAGTGACCTCAAGGGTCCCAGAGCACATAGTGCTCAACAGTGGT  
 TGATTTGAAGCCATAAATTTT CAGCAGAGACAGAATAGAAGAATATCGCCTTTAGGTGTAAT  
 ACAGAATCCATACAAAGAGGTCATAGGAGACTCCGTTGGGCGAGCATGTTT GAGGCGATTAG

AAAATGTATGAAAAAAGAGAAAATACGCCGCGTCCCAATCCAACCCAGCCAAGGAAACCGT  
 TAGATTGTA AAAACATGAAGGTCCCTACCCAGCAGAAAATGTCGCTTTTGAAAGCCCAAAGA  
 GATGAGGCATTGAGAAGGGATATACAATTGAGAAGAACAGTGAAAAATAGATTACAACAGAG  
 GCAACAGCAAAGTCAGCAGGCACATTCATCCCGAGCTCAAAGTCCAATACCTTCAAATGGCA  
 AATCTTCTTCAAATTTGGCTAGAAATGGGCAAGCGTCGGCTCCAAGACCAAACCAGAAAACAG  
 TATACTGAGCAAGATATCATTGAAAGTTACTCGAGGAAGTTGTTGGAGCAAAAACCAGACAT  
 TGGTCCTGAGATGGCCCTTAAGGCGGCAAAAAACTATTATAGAACCTTGAGAGAACAACAGC  
 AACAGCTAAAGCAGCACCAGATTCAACAGCAAAGGCAGCAGTTACAGGAGGAGTCCAGTCAT  
 GTGCAGCAACTGCAGCAACTACAACCAGGGTCTCAAGCTCCGCCACCGAAATCATCTCCATC  
 TCAATCTTCTCTTCCAATATTTCTAACATTAATTCTGCTCCAAGGATAAAGTCACCAACTC  
 CACAGGAGATTTTACAAAGGTTCCAAAAACAATGA

>YBL102W 0.8 Cold

ATGAGCGAGGAACCACCTTCTGACCAGGTCAATAGTCTCCGTGACTCATTGAATCGATGGAA  
 TCAAACAAGACAGCAGAACTCGCAGGGTTTTAATGAATCTGCGAAGACATTGTTCTCAAGCT  
 GGGCGGATTCTCTCAATACCAGGGCCAGGATATATATCAGACGTTGCCTGTATCTAGACAG  
 GACTTGGTGC AAGACCAGGAGCCGTCGTGGTTCCAATTGTCAAGAACGGAAAGAATGGTACT  
 TTTTGTCTGTTTTCTTTTGGGTGCAACAGCCTGTTTCACTCTTTGTACTTTCCTTTTCCCG  
 TTCTAGCCGCTAAACCAAGAAAGTTTGGTTTACTATGGACAATGGGGTCCCTACTATTTGTT  
 CTTGCGTTTTGGGGTACTTATGGGACCACTCGCGTACTTAAAACATTTGACTGCAAGGGAAAG  
 GCTGCCTTTTTTCGATGTTCTTTTTTCGCCACATGCTTCATGACGATTTATTTTCGCAGCCTTTT  
 CCAAGAACACGGTGCTGACTATTACATGTGCTCTTCTTGAATTAGTTGCCGTCATTTATTAT  
 GCTATTTTCATATTTCCCATTTCGGTGCAACAGTTTTGAGGATGTTAAGCTCTGCTGGTGTCAA  
 TTCGGCAAGAGGTGTTCTGCGCATCTGA

>YCR016W 0.79 Cold

ATGTCCGAAAATCACGTTCCCTGCCTGGAAAAGAATTGCTTTGAAGAGACAGACTATAAGCAG  
 TGGTGACGAAAAGTAAAGAAAAAGGCCAATCCAATCTAATAGATGATGATCCACTAAATATCA  
 CTACGCATTTATCCACTGGTAATTTGACAAAAGAAAGAGAAAAAAGAATCATTAAATGGTGAG  
 AGCAAATCCTCTACCAAAAAAGGGAAGCGTGTGTGCAAAACCAGGGACGAAGAAGAAGGAAAA  
 ATTGTCAAAGGATGAAAAGAATTGCAAAAAAATAAAATTCCTAAAGATCAATTACGTTACC  
 TGATAGAATTTTTTCAGGACAAAGTCTGAGAGCAAGTTTCCCACCGGAATCCTAGAATTGGAA  
 AGTGTA AAAAGAAAATTACGGCGACTCCCTGATCAAAGACGAGCCATCAGAGTCTGGTGTGT  
 TGAAGTTTTGGAAATTTTCCAAGCAAAGCAAATTTGGCTTATTAAGCATTTTTTTCAACTTGG  
 ACGAAATCCCTCAGTATATAATGATCTTTTGCCTTTTATATTTTCAGGGACTTACAAGGTA  
 TCAAAAAGAAGAACTAATATCAAAATGCAAAGGAAAACCTGAAGCAATGGAACGACTATGTGGA  
 AGATCAAGAAACAAAAATAAAAGCGTTAATTGCAGAGGATAAGGCTAGCGAACCAATTAATG  
 GTGAAGAAAAGAAGAAGGTGAAAAGACGGTAATGCCGAACAAGGGAAGCAAAAAGAGGTA  
 CAAGACGAGCAAGAGGAAGTACAAATGCCGAATAAAGAGCTTGTTCAAAGAAGTCTGAAATT  
 ACTAGAAATTTGGAAGAATGATGACTCGGAGCAGATAGAACTTAAGAATTTCTTCGTTGATG  
 TTTAA

>YLR086W 0.74 Cold

ATGCTGATAGTCCATTGAGCAAAAGACAAAAGCGGAAGTCCGCCCAAGAACCAGAATTATC  
 TCTTGATCAAGGTGATGCCGAAGAAGATTCGCAGGTAGAAAACCGAGTTAACCTAAGCGAGA  
 ATACACCAGAGCCGGATCTTCCCTGCGTTGGAAGCATCTTATTCCAAATCTTATACTCCCAGA  
 AAGCTTGTTTTAAGTTCTGGGGAAAATCGGTATGCCTTTTCTCAACCTACAACTCAACAAC  
 CACGTCATTACATGTACCGAACTTGCAACCACCAAAAACCTCTTCTAGGGGTGCGGACCATA  
 AGTCTTACTCTCAATCACCACCAAGGTCTCCAGGAAGATCGCCAACCTAGAAGATTAGAATTG  
 CTCCAGCTTTTCGCCAGTAAAAATAGCAGGGTTGAACTACAAAAAATTTATGATAGGCACCA  
 GTCGTCGAGCAAGCAACAGAGCAGACTATTTATTAACGAAC TAGTCTTAGAGA ACTTCAAGT  
 CCTACGCTGGTAAACAAGTAGTAGGACCCTTTCATACTAGCTTCTCGGCCGTGGTAGGCCCC  
 AATGGTT CAGGTAAATCAAATGTCATCGATTCCATGTTATTTGTATTTGGATTTAGAGCGAA  
 CAAGATGAGACAGGACAGATTGTCGGATTTAATTCATAAATCAGAAGCTTTCCCAAGTTTGC  
 AATCATGTTCCGTAGCTGTACATTTTCAGTACGTTATTGATGAATCTTCGGGTACTTCCCGA  
 ATCGATGAAGAAAACCTGGATTGATCATTACAAGGAAAGCCTTTAAAAACAACCTCATCGAA  
 ATATTACATAAACGAAAAAGAAAGTAGCTACACAGAGGTGACAAAGCTTTTAAAGAATGAGG

GTATTGATTTAGACCATAAACGATTTTTTAATTCTACAAGGTGAAGTAGAGAATATTGCTCAA  
 ATGAAGCCTAAAGCAGAAAAAGAGAGTGACGACGGACTACTGGAATATCTGGAGGACATAAT  
 TGGAACTGCAAACATAAAGCCGTTAATTGAAGAGCGAATGGGACAGATTGAGAATCTAAATG  
 AAGTTTGCCTGGAAAAGGAAAAAGATTTGAAATTGTTGATAGAGAAAAAACTCTTTAGAG  
 TCAGGAAAGAAACGGCGTTAGAGTTTTTAGAGAAGGAAAAGCAGCTGACGTTTTAAGATC  
 AAAATTATTTCAATTTAAATTTGTTGCAAAGCAACTCTAAACTTGCCAGCACCTTGAAAAAGA  
 TCTCCTCTTCGAATAAAGACCTCGAAGATGAGAAGATGAAATTTCAAGAATCTTTGAAAAAA  
 GTGGATGAGATTAAAGCACAACGTAAGGAAAATAAAGATCGAATATCATCTTGTAGCTCGAA  
 AGAAAAGACCCTGGTTTTAGAAAAGAAGAGAAATAGAAAGGCACCAGGGTGTCTCTAGAAAGAGA  
 GAACAAAAAATTTGGTAAGTAAAATGGAAAAAGCAGAAAAGACTTTGAAATCCACCAAACAT  
 TCAATATCGGAGGCCGAGAATATGCTTGAAGAGCTTCGTGGACAACAAACCGAACACGAGAC  
 GGAGATCAAAGACTTGACTCAATTTGCTGGAAAAGGAACGAAGTATACTTGATGATATTAAC  
 TATCTTTGAAAGATAAAAACGAAGAATATATCTGCAGAGATTATTCGGCATGAAAAGGAACTG  
 GAGCCTTGGGACCTCCAACCTCAGGAAAAAGAATCACAGATACAATTGGCTGAATCCGAACT  
 ATCTTTGTTGGAGGAACTCAAGCTAAACTGAAAAAAAACGTTGAAACTTTAGAAGAAAAAA  
 TTCTTGCCAAGAAAACACACAAGCAGGAGCTACAAGATCTTATCCTCGATCTGAAAAAGAAG  
 CTGAACTCACTTAAAGATGAAAGGTGCGAAAGGTGAAAAGAATTTTACTTCTGCTCATCTAAA  
 GTTAAAAGAAATGCAAAGGTTTTGAACGCGCATCGCCAGCGTGCAATGGAAGCTAGATCCT  
 CTTTATCAAAGCTCAGAATAAAAAGTAAGGTTTTAACAGCTTTATCGAGACTGCAAAGTCA  
 GGACGTATAAATGGTTTTCCATGGACGTTTTGGGCGATTTGGGCGTTATCGACGATAGTTTTGA  
 CGTTGCTATTTCTACTGCTTGTCCGAGACTAGATGATGTCGTGGTTGATACTGTAGAATGTG  
 CGCAACACTGCATCGACTACTTAAGAAAAAACAACTTGGTTATGCAAGGTTTTATTCTCTTG  
 GATAGGTTACGCCAATTTCAATTTACAACCTATCAGTACACCAGAAAATGTACCGAGACTATT  
 TGATTTAGTTAAACCTAAAAACCAAATTTCTCAAATGCATTTTACAGTGTTCTTAGAGACA  
 CTTTGGTTGCTCAGAATTTAAAAACAAGCCAATAATGTAGCATATGGGAAGAAAAGATTTAGA  
 GTTGTCACTGTGGATGGGAAATTAATTGATATTTCTGGTACAATGAGTGGTGGTGGCAACCA  
 TGTAGCAAAAGGTCTAATGAAATTAGGTACGAATCAGTCAGACAAGGTTGATGATTACACCC  
 CCGAGGAAGTAGATAAAAATTGAGCGTGAGCTATCTGAAAAGAGAAAATAACTTCCGCGTGGCA  
 AGCGATACGGTCCACGAGATGGAGGAAGAACTGAAAAAATGAGGGACCACGAACCAGACTT  
 GGAATCACAAATATCAAAGGCAGAAATGGAAGCTGATTCTTGGCGAGTGAATTGACACTGG  
 CAGAACAACAAGTGAAAGAGGCAGAAATGGCGTACGTCAAGGCAGTTAGTGACAAAGCGCAA  
 CTAACGTTGGTGATGAAGAATTTGGAACGCTTGAGAGGCGAATACAATGATTTGCAATCCGA  
 AACAAAACTAAAAAGGAAAAGATCAAAGGCTTGCAAGACGAAATCATGAAAATTGGTGGTA  
 TCAAATTGCAAATGCAAATTTCAAAGTTGAATCAGTTTGTGAGAAATGGATATTCTAGTG  
 GCCAACTTAAAAAAGTCAAATCTGCCTCAAAGAAGTCAGGAGGAGATGTCGTAAGTTTCA  
 AAACTGCTCCAAAACCTCTGAAAGAGACGTAGAACTATCATCAGATGAGTTAAAAGTCATCG  
 AAGAACAATAAAACATACAAAACCTGGCTTTGGCAGAAAATGACACAAATATGAATGAGACG  
 CTCAACTTGAAAGTTGAATTTAAAAGAACAGAGCGAACAACCTGAAGGAACAAATGGAGGACAT  
 GGAGGAAAGCATCAATGAATTTAAATCTATAGAAATCGAAATGAAGAACAAGCTGGAAAAAT  
 TGAACACTGTTGACGTACATCAAAGTGAGATAACGCAGCAAGAAAAAGGATTAACGAA  
 CTATCAATTAGGGATGTAACCCACACCCTGGGAATGTTAGACGATAATAAATGGACTCAGT  
 GAAAGAGGATGTTAAAAACAATCAAGAACTTGATCAGGAATACCGGTCCTGTGAAACTCAAG  
 ATGAGAGTGAAATAAAGACGCTGAGACTTCTTGTGACAATTATCATCCTATGAACATTTGAT  
 GAGACTTCAGATGAGGTATCCAGAGGGATAACCAAGACTTCTGAGGACGAATTAAGGGAGTT  
 GGACGTAGAACTGATTGAAAGTAAAATAAATGAATTTGTCATATTATGTCGAAGAGACTAACG  
 TGGATATTGGAGTTTTGGAAGAGTACGCTAGGCGCTTAGCAGAGTTCAAAGAAGGAAGCTG  
 GATTTAAATAATGCTGTTCAAAAAAGAGATGAAGTTAAGGAACAATTAGGAATACTTAAAAA  
 GAAAAGATTTGATGAATTTATGGCTGGCTTTAATATCATATCAATGACCCAAAAGAAATGT  
 ACCAAATGATTACTATGGGTGGAAATGCTGAATTAGAACTTGTGGATAGTCTAGATCCTTTT  
 TCTGAAGGAGTTACGTTTAGTGTTATGCCTCCTAAAAAGAGTTGGAGAAAATAACAAACCT  
 TTCAGGTGGTGAGAAAACACTAAGCTCCTTGGCTTTGGTTTTGCTTTACATAAGTATAAAC  
 CAACCCCTTTATGTCATGGATGAAATAGATGCCGCTCTGGATTTAGAAAATGTCTCAATC  
 GTAGCTAACTATATCAAAGAAAGAACCAAGAATGCACAGTTTATTGTTATTTGCTGAGAAA  
 TAACATGTTTGAATTAGCACAACAGTTAGTTGGTGTTTATAAAAAGAGATAATAGAACCAAAA  
 GTACCACGATTA AAAACATAGATATCTTAAACAGA ACTTAG

>YGR289C 0.74 Cold

ATGAAAAATATCATTTTCATTGGTAAGCAAGAAGAAGGCTGCCTCAAAAAATGAGGATAAAAA  
 CATTTCTGAGTCTTCAAGAGATATTGTAAACCAACAGGAGGTTTTCAATACTGAAGATTTTG  
 AAGAAGGGAAAAAGGATAGTGCCTTTGTAGCTAGACCCTTAGAGTTCACCACCAATTCAGCC  
 CAGTTAGGAGATTCTGACGAAGATAACGAGAATGTGATTAATGAGATGAACGCTACTGATGA  
 TGCAAATGAAGCTAACAGCGAGGAAAAAAGCATGACTTTGAAGCAGGCGTTGCTAAAAATATC  
 CAAAAGCAGCCCTGTGGTCCATATTAGTGTCTACTACCCTGGTTATGGAAGGTTATGATACC  
 GCACTACTGAGCGCACTGTATGCCCTGCCAGTTTTTTCAGAGAAAATTCGGTACTTTGAACGG  
 GGAGGGTTCTTACGAAATTACTTCCCAATGGCAGATTGGTTTAAACATGTGTGTCCTTTGTG  
 GTGAGATGATTGGTTTGCAAATCACGACTTATATGGTTGAATTTATGGGGAATCGTTATACG  
 ATGATTACAGCACTTGGTTTGTAACTGCTTATATCTTTATCCTCTACTACTGTAAAAGTTT  
 AGCTATGATTGCTGTGGGACAAATCTCTCAGCTATACCATGGGGTTGTTCCAAAGTTTGG  
 CTGTTACTTATGCTTCGGAAGTTTGGCCCTTAGCATTAAGATATTACATGACCAGTTACTCC  
 AACATTTGTTGGTTATTTGGTCAAATCTTCGCCCTGTTTATGAAAACTCACAAGAGAA  
 TTTAGGGAACCTCGACTTGGGCTATAAATTGCCATTTGCTTTACAATGGATTTGGCCTGCTC  
 CTTTAATGATCGGTATCTTTTTCGCTCCTGAGTCGCCCTGGTGGTTGGTGAGAAAGGATAGG  
 GTCGCTGAGGCAAGAAAATCTTTAAGCAGAAATTTTGAGTGGTAAAGGCGCCGAGAAGGACAT  
 TCAAGTTGATCTTACTTTTAAAGCAGATTGAATGACTATTGAAAAAGAAAAGACTTTTAGCAT  
 CTAATCAGGATCATTCTTTAATTGTTTTCAAGGGAGTTAATGGAAGAAGAACGAGACTTGCA  
 TGTTTAACTTGGGTAGCTCAAAAATAGTAGCGGTGCCGTTTTACTTGGTTACTCGACATATTT  
 TTTTGAAGAGCAGGTATGGCCACCGACAAGGCGTTTTACTTTTTCTCTAATTCAGTACTGTC  
 TTGGGTTAGCGGGTACACTTTGCTCCTGGGTAATATCTGGCCGTGTTGGTAGATGGACAATA  
 CTGACCTATGGTCTTGCATTTCAAATGGTCTGCTTATTTATTATTGGTGGAAATGGGTTTTGG  
 TTCTGGAAGCAGCGCTAGTAATGGTGCCGGTGGTTTTATTGCTGGCTTTATCATTCTTTTACA  
 ATGCTGGTATCGGTGCAGTTGTTTACTGTATCGTTGCTGAAATTCATCAGCGGAGTTGAGA  
 ACTAAGACTATAGTGCTGGCCCGTATTTGCTACAATCTCATGGCCGTTATTAACGCTATATT  
 AACGCCCTATATGCTAAACGTGAGCGATTGGAACCTGGGGTGCCAAAACCTGGTCTATACTGGG  
 GTGGTTTTACAGCAGTCACTTTAGCTTGGGTCATCATCGATCTGCCTGAGACAACCTGGTAGA  
 ACCTTCAGTGAAATTAATGAACTTTTTCAACCAAGGGGTTCTGCCAGAAAATTTGCATCTAC  
 TGTGGTTGATCCATTCGGAAGGAAAAAAGCTCAACATGATTGCTAGCTGATGAGAGTATCA  
 GTCAGTCCTCAAGCATAAAAACAGCGAGAATTAATGCAGCTGATAAATGTTAA

>YGL132W 0.6 Cold

ATGGAIAAATAACACAACAAGCCGCGCAAGATTGGACCATACTTTCTATCTAAGGTAAC  
 TATCACTTACTGGCTTGATGGATGCGTATTTTTGTGCGGTACCAGCTTCTGAAATATCGATAT  
 CAAACATAGCTGGCTCAATTCCTTCCATCAATTGCTGGGTAATTTGACTGGTAAACCGTTA  
 TCGTTAGAGATATTAGCAGATGCGCTATCAAAATCGAGTCTTGGGCACCTGATCTCAAATT  
 GCAAGAATGGCAAATAATATCTTTCATACCAGTATAAACTTTTTGTTTTGTACCACAATGTGGGC  
 AAGTCCTTTCGAAAGGAAGTACGTAA

>YOR020C 0.75 Cold

ATGTCCACCCTTTTGAAGTCTGCTAAATCTATCGTTCCATTGATGGACCGTGTCTTGTCCA  
 AAGAATCAAGGCACAAGCAAAGACAGCATCCGGGTTGTATTTACCTGAAAAGAACGTGGAGA  
 AGTTAAACCAAGCTGAAGTTGTTGCCGTAGGCCCGGGCTTACTGATGCTAATGGTAATAAG  
 GTTGTTCCTCAAGTTAAAGTTGGTGACCAAGTTTTGATTCCACAGTTTGGTGGTTCTACCAT  
 TAAATTGGGTAACGACGATGAAGTTATTCTTTTCAGGGACGCTGAAATCCTGGCTAAGATTG  
 CCAAGGACTAA

>YPL207W 0.81 Cold

ATGGATGGTTTTTCGTGTAGCTGGTGCCTTAGTAGTTGGTGCCTTAAACCGCTGCATATTTATA  
 TTTTGGCGGAAGGTTTTTCGATAGCGCTGGTCATTATAGTAGGTTATGGTATTTATTGCAATG  
 AAGCCAGCGGTGGTAGTCAAGATAGTCAAGAGAAGCTCGATTTGAACAAACAACAGAAAAAG  
 CCATGTTGCAGTGATAAGAAGATTGCGGATGGAGGAAAAAACTGGCGGATGTTGTTCTGA  
 TAAGAAGAACGGTGGTAAAGGTGGAGGATGCTGTTCCCTCAAAGGTGGAAGAAAGGGG  
 GGTGTTGTTTCATCTAAAGGTGGAAGAAAGGAGGATGTTGTTCCCTCTAAAAAGAATATTGGT  
 GACAAATGAAAATCTGCCACTGAAGTTGAGAAAGCCGTAATTTACCCTGTTACTGTGGATTT  
 TACAGAAGTTTTTAGGAAGCCACTAAGAAAAGGTCGAGTACCCCAAGGTTTTTTTCGAAAA  
 ATAGCTCGTCTAACTCTAGAGTAGGTAAAAAATTAAGTGTTCAAAGAAGATAGGTCCAGAT



GGATTGATCAAGAGCGCGTTGACTATTTGAAATGAAACGCTTTTGGAGTTCACAGATCTATGT  
 GTTATATAGTTCCCTGCAAGGTGCAGCTTCGAAAGCTGCAAAGAGCGTTTACGACAAACTAA  
 AGGAATTGGATGAATTGACTAATGAGCCAAAACCTTTTGAACCTTGACGATCTATCCGATTTT  
 GATGACTATTTTATAAATGTTCCCGTTGAAAATGCATTGTATGTGCTTGTTTTACCGTCTTA  
 TGATATCGATTGCCCTCTAGATTATTTCTTACAAACTCTTGAAGAGAATGCGAATGATTTTA  
 GAGTAGATAGTTTCCATTACGAAAATTGGTTGGCTACACAGTTTTGGGGCTTGGTGATTCA  
 GAATCATGGCCTGAAAAGTTTTGTTATCAAGCCAAAAGGGCCGATCACTGGATTTCTCGTTT  
 AGGTGGCAGGAGAATTTTCCCTTAGGCCAAAAGTTTGTATGAAAACAGGAGGTAGTGCCAAAA  
 TCGATGAGTGGACATCATTGTTAGCAGAGACTTTGAAAGATGATGAACCAATTATTTATGAG  
 TATGATGAAAACGCAGACTCTGAGGAAGATGAAGAAGAAGGTAATGGTAGTGATGAATTAGG  
 CGATGTAGAAGATATTGGTGGTAAGGGTAGTAATGGAAAAGTTTTTCCAGGCGCAGATGAAAATCA  
 AACAAATGGTGGCGAAAAGACAGTCCAACGTACAAGAACTTGACAAAGCAAGGTTACAAAAGTT  
 ATTGGTTCCCATTCAGGCGTTAAGATCTGCCGATGGACTAAGAATGAACTACGTGGTAAAGG  
 GTCTTGTATAAAAAATCGCTCTTCAATATCGCGTCCAGTAGATGCATGGAATTGACTCCTT  
 CTTTGGCATGTTTATCCAAATGCGTTTTCTGTGGAGGCATGGTACAAATCCCCTGTCAAAA  
 AACTGGAGATGGGAAGTAGATGAACCAGAATACATTCTAGAAAATGCTCTGAAGGGACACTA  
 TTCCATGATCAAAACAGATGAGAGGTGTGCCCGGTGTTATTGCAGAAAAGATTTGCGAAAAGCGT  
 TTGAAGTTCGTCATTGTGCCTTGTCTTGTGCGCGAGCCTATTCTTTATCCTCATATCAAT  
 AAAATTTATCCAATTATTACACCAAAGGGCATAACTAGTTTCCTTGTGTGCAATGCCCAACA  
 TCCAGAGGCCTTGAGAAATATTGTTAAAGTAACACAATTATATGTTTCTATTGACGCACCCA  
 CCAAGACAGAGCTGAAAAAAGTGGATAGACCTTTGTACAAAAGATTTCTGGGAGAGAATGGTA  
 GAATGCTTAGAGATTTTTGAAAACGTGACAAAACCATCAAAGGACAGTTTTTCCAGGTTAACTTT  
 AGTAAAAGGTTTTCAATATGGGTGATGTGAGTGCATATGCAGATCTGGTCCAACGTGGTTTAC  
 CAGTTTTTCAATGAAGTTAAAGGCGCCACGTTTAGTGGCTCATCTGATGGGAATGGTAATCCT  
 TTGACAATGCAGAATATTCCATTTTACGAGGAATGTGTAATAATTTGTGAAGGCGTTTTACCAC  
 GGAATTACAAAAGACGTGGATTACATTACGACTTGGCTGCCGAACATGCGCATTTCCAACGT  
 TATTAATTGCAGACACGAAATTCAAAATTAATGGAGAATGGCATAACACATATCGATTTTGAT  
 AAATTTTTTCTGATTTGCTAAACTCGGGCAAAGACTTTCAGTACATGGACTATTTAGAAAAGAC  
 ACCCGAATGGGCATTTGTTTGGCAATGGTGGGTTTGCACCAGGGAATACAAGAGTGTACAGAA  
 AAGATAAGAAAAGCAGAATAAGGAAAATCAAGAACTACAACGAGAGAGACGCCTCTCCCT  
 CCTATTCCTGCTTAA

>YGR014W 0.75 Cold

ATGCAGTTTCCATTTCGCTTGTCTCCTATCGACCCTTGTAATTAGTGGGTCATTGGCCCGGGC  
 CAGCCCCTTCGACTTTTATATTTCGGCAATGGAACGCAACAAGCTCAGAGCCAAAGCGAGAGTC  
 AAGGTCAAGTTTTCTTTCACCAATGAAGCTTCTCAGGATAGTTCCACCACCTCTTTGGTAACA  
 GCCTATTCTCAAGGTGTTTTCATTTCGCACCAGTCTGCAACAATAGTGAGTGCCACAATCTCTTC  
 CCTCCATCTACTTGGTATGATGCGAGCTCCACTTCCAGACTTCTGTGTATATGCCAGTC  
 AAGAATCCGACTATGCCGTTAATCAAACCTCTTGGAGCGCTCTACTAATCAACTGCCATCT  
 ACCAGTACGACAAGCTACTATGCGCAACCTTTCAGTACATCGGCCGATTTTGTGCTTCTAG  
 TGTAATGCAGCTTCTGATGTCTCCACTGCCAGTGTTCCTATTGATACGAGTGCTAATCTTA  
 TCCCTTTCACAACACTACAAGTAACATAGAGACTACAACGAGTGCACCTCTCACTTCGGACACT  
 CCACTTATTTCCACTAGTACGATGTCCGCAGCTGATAACGTATTTTTCGTCAGCAAACCTTAT  
 TTCTGCCTCCCTAACAACCACCGATAGTTTCAGAAAAGTTTTGACCAAACCTTCGACTGCTGGTG  
 CCATTCGGGTGCAAAGTTTCAGCAGATTTTAGTAGTTCTAGTAAAATTTTAGTACAAAAGTTTCG  
 GCGGATTTTCAGTAGCCCTAGTTCTCCAACACTACTACCGATATATCGCTATCAGCTGCCCCACT  
 GCAAACAAGTGAATCAAGCAGTTTTTACCCTGCATCAGCAGCTTACCAGTAAGTTCAACAG  
 ACGTTGATGGCTCAAGCGCCTCACCTGTAGTGAGCATGAGCGCCGAGGACAAATAGCTAGC  
 TCAAGCAGCACAGATAATCCAACATATGTCAGAAAACCTTTTCGTTAACATCTACAGAAGTTGA  
 TGGTTCCGATGTTTTCATCAACAGTGAGCGCATTTATATCGGCTCCTTTTTTACAAAACAAGTA  
 CTTCACACAGTTTTCAGCATTGTTAGCCCATCGGTATCTTTTGTTCATCACAGAGTTCTCA  
 GACGTTGCTAGCTCCAGTACTGCAAATGTAGTTAGTTTCATCCTTTTTCTGATATTCCACCGCA  
 AACTAGTACCTCAGGGAGCGTAGTTTCGGTAGCGCAATCCGCATCTGCCCTCGCATTTCAA  
 GTTCAACAGAGGTATATGGTGCCAGTGCCTCGAGCACAATGAGTTTCAATATTATCAACTACT  
 TCGCTACAGTCTACTACTTTGGATAGCTCAAGTTTAGCTAGCTCCTCTGCGTCGAGTTTCA  
 CCTTACAGATTATGGCGTCTCCAGTACAGCAAGCATAACCGCTGTTGTGAGCCTCAGAACAG  
 CAAGTACTTCCAGCAGTTTTAGCGTTGTTAGCCCTTCGGTATCTTTTGTTCATCACAAAAGT

TCCTCAGATGTTGCTAGCACCAGTGCTCCAAGTGTAGTTAGTTCATCCTTTTCTTATACTTC  
 ACTGCAAGCAGGTGGCTCTAGCATGACCAATCCCTCTTCATCAACTATAGTATATTCAAGTA  
 GTACTGGCAGTCTGAGGAATCCGCTGCATCTACAGCTTCTGCAACACTGTCGGGCTCCTCG  
 TCTACTTATATGGCAGGAAATTTGCAATCACAGCCTCCATCCACTTCAAGTTTGCTTTCGGA  
 GTCTCAAGCTACAAGCACTTCAAGCTGTGCTAGCTAGCAGTCTGTTTCTACAACCTCACCT  
 ATACCACTGCAGGTGGTGCATCTACAGAGGCCATCCCTCATATCATCTACATCTGCGGAA  
 ACTTCCCAGGTAAGTTATTCACAAAGCACAACCTGCATTGCAAACCTTCTCATTCGCATCGTC  
 TTCAACAACAGAAGGAAGTGAAACATCTAGTCAAGGTTTTTCTACCAGCTCTGTTTTAGTTC  
 AAAATGCCTTCTTCGATTTCCAGCGAATTTCTCACCTCTCAGACGACAACCTCAAATGAATTCT  
 GCAAGCTCATCATCTCAGTACACTATATCATCCACTGGTATACTTTCTCAGGTTTCAGACAC  
 ATCGGTGTCTTATAACAACCTCAAGTTCGTCTGTTTCTCAAGTTTCAGACACACCAGTTTCTT  
 ATACAACCTCAAGTTCGTCTGTTTCTCAAGTTTCAGACACACCGGTTTCTTATAACAACCTCA  
 AGTTCGTCTGTTTCTCAAGTTTCAGACACACCAGTTTCTTATAACAACCTCAAGTTCATCTGT  
 TTCTCAAGTTTCAGACACACCGGTTTCTTATAACAACCTCAAGTTCGTCCGTTTCTCAAGTTT  
 CAGACACGTACAGTACCTTCTACAAGTTCAGATCGTCCGTTTCTCAAGTTCAGACACTCCG  
 GTGCCCTTCTACAAGTTCAGGTCGTCCGTTTCTCAAACATCTAGCTCACTACAGCCCACCAC  
 TACATCCTCCCAACGTTTCCACTTCTCACTCATGGAGCGCTTTCTGAAAAGTAGTTCTGTTA  
 GCCAACAAGCTTCTGAGATTACTAGCTCAATCAATGCAACAGCTTCCGAATACCATAGCATC  
 CAGACAACCGCGGCTACTCAATCCACAACCTCTATCTTTTACCGACGCAAACAGCAGTTCTGC  
 TTCCGCTCCATTGGAAGTGGAACGTCTACGCCAACCCCATCTTCAAAGGCATCCTCTCTGT  
 TGCTTACACCATCAACATCCTCTTTAAGTCAGGTTGCTACAAATACTAATGTACAGACGAGT  
 TTAACAACGGAAATCGACGACCGTTTTTAGAACCATCAACGACTAACAGTTCAGTACGTTTAG  
 TCTGGTCACTTCAAGTGACAACAATTGGTGGATTCCAACGAGTTAATCACGCAGGCACCAG  
 AAGCTGCATCCACTGCATCTTCTACCGTTGGAGGAACACAAACTATGACTTTGCCCATGCA  
 ATTGACAGCCGCGACACAAGTTCAGGAGCCTGAGGGCTACACCCTAATCACAATAGGGTTCAA  
 AAAAGCTTTGAACTACGAATTTGTTGTATCAGAACCAAAATCATCGGCTCAAATCTTCGGAT  
 ACTTGCCTGAAGCTCTGAACACACCTTTTAAAGAACGTATTCACAAACATTACGGTACTACAA  
 ATAGTGCCATTACAGGATGACTCACTCAACTACTTAGTAAGTGTGCTGAAGTATACTTTCC  
 AACTGCAGAAATAGAGGAGCTGTCAAATCTAATTACCAACTCTTCAAGCGCTTTTTTACACGG  
 ATGGAATGGGTACAGCAAAATCTATGGCTGCAATGGTTGATTCCCTCAATACCGCTAACGGGC  
 CTCTTACACGATAGTAACAGCAACTCTGGCGGATCTTTCGGACGGATCCTCCTCCAGTAATTC  
 GAACTCAGGATCTTCAAGTTCAGGATCTAATTCGAACTCCGCTGTGTCTTTCATCTTCGGAA  
 ATTCCTATCAAGATGCCGGTACTTTGGAATATTCATCCAAATCTAACTCCAACGTATCCACT  
 TCTAGCAAATCAAAGAAAAAATCATTGGTTTAGTTATCGGCGTTGTTGTTGGTGGATGCTT  
 ATATATTTTATTCATGATTTTTGCTTTCAAGTATATCATAAGAAGGCGGATTCAAAGTCAAG  
 AAATATCAAGAACCAGAAATTTCCAGTATCAGTTCAAGTGAATTTGGTGGAGAGAAAAAT  
 TACAATAATGAAAAGAGAATGAGCGTTCAAGAATCCATAACACAATCTATGCGAATTCAAAA  
 TTGGATGGATGATAGTTACTATGGTCACGGGTTGACAAATAATGACTCAACTCCAACCAGGC  
 ACAATACATCGAGTTCCATAACCAAAAATTTCAAGACCAATTGCTAGCCAAAACCTCCCTGGGT  
 TGAACGAAGTTTGA

>YBL103C 0.75 Cold

ATGATGAACAATAACGAAAGTGAGGCTGAGAACCAACGTCTACTGGACGAATTAATGAACCA  
 GACAAAAGTCCTCCAGGAACTTTAGATTTTTTCGTTAGTGACACCCACTCCACACCACAATG  
 ATGATTACAAGATACACGGAAGTGCCTACCCAGGTGGTGAGACTCCTGCCAACAGCATGAA  
 AAATCTCATAATCAATACGCACAACCTTAACGATAATAATAACTTAATGGGCAGTCAAGC  
 GAGGTCCAATTCACAAACTCCTACAGCTTCGACCATATATGAGGAAGCAGAATCGCAATCGT  
 CTTACCTGGATGATATGTTTAGAACAAAGCCAAGGCGGTAGACCTGTCACTCAAATTCATA  
 TCTTCCATAGGGCAGGGTCCCTTGAGATCATCTTATTCTATGGCTTACGACTCACCTGTGGA  
 TAGAGCAATGAATACTCCATTACAGCAACAAGAAGGCTTAAAAGCTGAGTTACCACATGACT  
 TTTTATTTTCAGCATGGCACCGATGACACAATGTATAACTTAACTGATGATTTGAGCTCCTCT  
 TTATCTTCTAGCATCAATCTGATATGATGACACCAAAACACATATTCATCATCATTTTTCTTA  
 TAATCCACAAAGCTTGGGCCAGCATCCGTATCTTCCACATATTCCCCAAAGGTAAGATCAC  
 CATCATCGTCATTTTCGTGCAGGAAGTTTCTTTCATCTTCTTTTAGGCATGGTAGCATAAAC  
 ACACCAGAACAAGACACACTCAATAAGTAGCAATATGACTGAAAATATAGGACCTGGAAG  
 TGTTCCAAAGATTTTAGGCGGGTTAACTTCTGATGAGAACTGAGGCGCAAAGAGAGTTTC  
 ATAATGCCGTGCAAAGGAGAAGAAGAGAATTAATAAAGCAAAGATAAAAAGAACTCGGCCAG

TTGGTTCCACCATCTTTATTGAATTACGATGACCTAGGTAAACAAATCAAACCAAATAAGGG  
TATCATTTTTGGATAGAACGGTCGAATATTTACAATACCTGGCCGAAATTTTAGAAATACAAG  
CACGAAAAAAGAAGGCGTTATTGGCGAAGATAAAAGAATTGGAAGAGAAGAAAAGTTCTGTC  
GCAGCATTATCTCCTTTTACCAATAACCACCATGCCAGTTCGGGGCAAATAATAGCGAGAA  
TAGTGAGGAAAGAATTATAGATATTAGATCTGTCCCAAATGCTTTGATGAATGAACAAAATA  
GTAAGGCTGAATTGCACAATTGGGAGCCACCGTTATATGATTCGGTCCGTAACCACAATCAT  
GCTGGCACTATGGAGAGTCATCCACATACAAACATTCATGAAGAATTAAGGAGTTCTTATC  
AGGCGATTTGATTGAAGCCGAAGATAATGCAAATTAATGTTTGGAGATGACAACCTAATC  
CAGCTGACTATCTTTTAGAATTTGGTTCCGGGGTAG

>YLR290C 0.81 Cold

ATGATACCAAAGCTTATAGTTTTTGGAGGCAATGGATTTTTAGGTAAAAGAATTTGTCAAGA  
AGCAGTGACTTCGGGCTACCAAGTCGTTTCTGTGTCAAGGTCCGGTAAAGCTCCTCATAGCA  
ATGAATTAATGATAAGCAATGGATGCAGGAGGTCCAATGGACCGCTGCTGACATTTTTAAG  
CCTGATTCTTACCATGAATTAATGAATAATGCTACTAACGTAGTTCATTCCTTTGGGAATCCT  
CCTAGAAAATGAAAATTATAAGCAAACCTCTATCCAAATCCCCTACATATGATTCAAAATCAC  
GCCTTCTATCTTTTGGTGCAGGTCCAAATCCTTTAAAAAAAAGCAGTCCCTTATTTTACTTAT  
GAAATGATGAATAAGCAAAGTGCTATTATTTTGGCAGATACATTTAAACAAAAAATCCTAAA  
GAAAAGCAAAAAGGAGCAAGAAAAAGCAAATCAAAGATCTTTTACGTATATTTCCGCCGATA  
AAGTTTTCCCATGATTCTAGTGGCTATATTAATTCGAAAAGAGAGGCGGAGATTGAACTA  
GAAAAAATGCAGAGATATTTTCCAGGCCTATTATTTGTGAGACCCGGTTTTATGTTTCGATGAGCA  
CAGAAATGCAATTGGACCACGGTCTTTTTATTCATACTGCACCTGAACTACTTTACTGCGGTA  
ACAAATTTCTATTGAGAAATAAGCTGCAGCTTTTGAACGACTTGATTAGGCCAACAGTATCC  
ACTCAGCAGGTAAGCAAATCCGTCCTGAAAAATATCGAAAACCCAGATTTTAAAGGGGTAGT  
TACACTTGAGGAAATACTTAAAGCATAA

>YJL059W 0.8Cold

ATGAGTGACAAATCTCATCAGATATATTGCTACTTTTTGGCTCTTTGGTTTGATCAATAATGT  
ACTTTATGTGGTAATACTTTTCCAGCAGCTGTTGATATCGTGGTCCCTACCTTGCCTAAATCTC  
TAGTATTGCTAGCAGATATATCCCATCACTCGCCATTAATTTGTGTTCCCATTCCTTTATT  
GATAGAATCAAGTACAGCTATAGAATATGGTCTTTGATCACGATGAGTTGCTTAGGAATGTT  
CTTAGTTTTCTTTTAAAACTTGTTTGTTTGTCTTTTAGGAATATCTTTCGCATCTATATCTT  
CCGGATTTGGAGAAGTGACATTCCTACAGCTAACACACTATTACAAACAAATTTCTTTGAAT  
GGATGGTTCGTCAGGACTGGTGGTGCAGGAATCATTGGCGGAGCATCTTATATGTTCTTAAC  
TTCAATCTTTAAAGTTCAGTGAAGCTAACTTTACTAGTATTTAGTCTCCTTCCATTTGCAT  
TTTTGTTTTTATTTTAAATTAGAATCCAATGATACCAACCTGACTTACCAAAGTCTTCAACAA  
ATTGACGAAGCAGAGGATGACCAGTTGGTGCCCTTTTCTGTCGCCTTTACACATAACCAACGC  
TTCGCAATCCCTGTATTCTACAAGACAGCACATTTTGCAAACGGTCAAGAGACTTCGAAGAT  
TGGTTTTTCCATACATGGTTCCATTGACCACCGTCTACTTATTCGAATATTTAATAAACCAA  
GCGGTAGCTCCGACCCTATTATTTCCGATTAATGGTGATGAAAGAAGTAAATCGATGCCATT  
TTCTTTCCATAAATACAGAGATATATACGTAACCTATGGAACGCTCTACCAATTAGGTGTCT  
TTATATCAAGATCCTTTGGACATCTTATGAGAATGAGGAGTTTATACATCTTAGCGTTTTTA  
CAAGGTGTGAATTTGTGCATAACGGTACTGCAATCATGGTTTTATGTCACACATTCGCCCTG  
GGCGGTGATGATATTAATATCTATGAGGGTTTTCTTGGTGGTGCATATGTTAACACAT  
TCTTAAATATTCTCGAACAAGAGGATCCTGATGAAACAGAGTTCGCCATGGGTGCTGTGTCC  
ATCGCTGATTCCTTTGGCGTTTTTTTTGGCTGCCTTACTTGGTTTTGGGGCTAGAACCCAACT  
TTGTAGGCATCAAATTCGGATGACAGACCTTGGTGTAGGATGGAATAA

>YPL007C 0.82 Cold

ATGAAGCTTCTAAAGGACTTATTGGTAGATAGAAAGGAATTTGAGGATTGGAAGAACAATTT  
AACATGGGCTCGGGATGGTACTCTATATTTGACCACATTTCCCTGATATTAGCATTGGGCAGC  
CAAAATATGCTAAAGACATTAATTGCAACAGTAAGAATTTATTTTCATGTGAAAGAATTCCTG  
CTAGAATTTGAAAATAAACTGGATTTGAGCTGGCGCAACAGAATGGGTATTAAATTCACA  
ACCTGTTTTGTTATCCCAGAGTCTGTAAGCCATACCAATAGACGATTGGATGGCCGTATTGA  
GCAATAATGGTAATGTTTCTGTGTTCAAAGATAACAAAATGCTCACAAATCTCGATTCAAAA  
GGAACTTAAAGTAGCAGAACCTACCATTGTTTTGAATGGAATCCTATTGAATCATCAATCGT  
GGTTGGTAATGAAGACGGTGAGCTTCAATTCCTTTAGCATTCGAAAAATTCAGAAAATACTC

CAGAATTTTATTTTGAGAGTAGTATTAGATTAAGTGACGCAGGCTCAAAAGACTGGGTCAC  
CATATAGTATGGTACGAAGACGTTCTTGTAGCGGCGCTTCAAACAATTCGTATTTTCAAT  
GACAGTTTCTGCTTCCTCTCATCAACCCGTTTCTAGAATGATACAAAATGCTTCGAGAAGAA  
AAATTACTGATTTAAAGATAGTGGATTATAAGGTGGTTTTAACTTGTCCCGGATATGTGCAT  
AAGATAGATTTAAAAAATTATCAATTTCTAGCTTGAAAACAGGATCTCTCGAAAATTTTCA  
TATAATCCCATTTGAATCATGAGAAAGAGAGCAGATATTATTTGATGTCCAATAAGACTAGTT  
ATAAAGTTTTACTAGAAGACGAACTTCATGTGACGGCTGATAATATTATCGCGCCTTACTTA  
GAGAAGAAATTCAGAAATGGAGCACAATTTGGAATGAATTCATAATATGAAACAACCTCT  
TGTCATACACGGAATATCTCTCTCTCCAGACGGCTATTCAATAGCCATAGTATACGATATGG  
AACGGGTGGCTTCAAATATAAAATAGCTTCAGAACAATCGTTTAAACATCATGTTCCGCCCA  
CTATATCATACTTGGACAATTTCTGAACGTGCTGTTGGATTAGCGTGGTATCAGACGTACCA  
AATTTACAACCAATCGCTGCCCAAACCTCCAGAAAATTTCAAGTATGAACAAGAAATTAAGTGA  
ATGGTAATTACCTTATTAGTCTGGATTTCCAATCATACTCAATGCATTAATGAAAAGTGAA  
GAGATGAGGATTATAATGTTCTTGAATATGACTATCGATAAACCGTCAATTTTTGTCAATTTT  
GGAAGCCTTATATGAATACGCTATAAACAAAAAATCCGAATTAACGAATAGTTTTGTATTTAG  
CTTGCGTATTATCTATAGCGGCAATACTTAAAAGAGAAGCGCCAATTTACAACGGCACGTTA  
TTGATGAAGAACAGCTTTCTCGAGGAAACGTTCAATTTAGAAAAGCTTCACGGCTGACCCCTGA  
AACTGTAACATCCACCACGAATAACACGTGGAAGAGGTGTGGTGTCACTTTGCTTCCAATAC  
TTACAACGCATGTAAGATATGTCCCGTGAGCAAACAACGGGTAATAGACATAAAAACGAGAT  
GATTTGAATGATTATGGTTGGTTTACAAGGGGTCTATTAGAAAAGATTTAATGAAATAAGCGT  
ATATTGTGGAACAACGCTGGAAGTTATGTAA

>YNL164C 0.74 Cold

ATGACACCTACAAACCAATCTAGTGGAACGACTAATGCATCTGTGGAGGTACTTTTCAGAGGA  
TGGACCTATGCCAATAAACGTTATGATGCAAGAAGGTGTGAAAGCGCTGACTAAAATTCCTT  
CCAATCAGCTTCAAGACAGACAAGCTTTTCAAACGCTCCTCATGCAATGCAATTCGTTATA  
AGAAATGGAGGAAAAGCTTTATCAAATGCACGGTTAGAAGAGCTCAAAGATGCTCTTCCCTAA  
GATGGACTCGTTGAGTTTGGAAAGATGAACTTGCGAAAATAGATGGCCAAAGTGCATACCACA  
TTGATTCGCGCAGAGGAAAAGGAAACCTTTGAAAGTAAAATAGGCCAAATAGCTTCTAGAAAT  
AGTGCAGACTTCATAATAGAGGAGGACTTGCAAAATATTTTAGATGATGATCTTAAAGACTC  
AGAACTTAACTTGGATGGCGAAGAAGCCGAAATAATTTTCGATTATGAGAGCCAAGAACTGG  
ATACACCGGATGGTATAGGGGAAAAGATTTCTCAAATGATAGAATCGGTGTTACCGGGAGGG  
TTTGGAAAGTGAAGAACAGGGGGGGTTGCGAACGTGAACAAATGTAGAGGATTTAGATGTTGC  
AGAAGAAGTCACAGATATCGATCATGATACCGTTGACGCAGCTCGTTTGCATGGAGACGGTC  
AACATTCATATCTTCTAGAAAAGCACAGCAGGTCAAAGAACTCGAAAAGAATGGGCATGTA  
AGGCGACATGACTTTTATGACGAATCTAGAGACCATAAAAAGTTGTTGCCCGCATCATCATT  
TGAAAACCTTATCCAACTACGAACTACTATTATCATGATTTTGAATATATTTCCAGAACGG  
AAAACCGTGTTCCAGATTTCTGTCTTAGTTAACGAATCAAGTCCCATGTGTTTATTTTGC  
GAGTACTACATGGTGTGTTGGTGAACCACCACGTAACATGATAAAGTGGTATAATCGTACGTT  
TGGTTACAATCGTATGCCGAATCCACCAAGAGATGAACAAGATAGTAGGAAAAGGAATAGAT  
AG

>YGL003C 0.74 Cold

ATGTCCACAAACCTGAACCCATTCATGAATAATACGCCTTCCTCCTCCCCACTCAAGGGTTC  
TGAAAGTAAGAGGGTATCGAAAAGCCAATATCTAGTTCTTCGTCCGCCTCACTATTATCAT  
CTCCCTCCAGGCGATCGAGGCCGTCTACAGTATATGGTGATAGGTATATTCCTTCCCGAACA  
GATATAGATTTCAATTCATCGTTTCCATCAGTAGTATGGCAAGCGTTCAGCCCTTAATCC  
ATCGAGTACGGAAGATCAAGTAGAATACAAAAGGAAAGACAGGCACATGAACTTATAATA  
CTTTGCTGAAGAATGAGCTTTTGGCGAGATGCTAAGCAAGGATACGGTAGGCTCAGAGAGC  
AGTATAGATCGCATTAAGAATACGAGACCATCTACTAGAGGCAATGTGCACGCAGAAAATAC  
AACTAGACATGGTTATGAACTGGAACGAGTATCAACTCCACCTCCTGAAGCTGCTGGTTTAG  
AGGAATTTTCGCCACATTCACGCCAGTCACTCCTCGACGTCTTTTTACATCACAGCAAGAT  
GAAATCACGAGACCCTCAAGCAACTCAGTTAGGGGCGCCAGCCTGTTGACTTATCAACAACG  
TAAAGGTAGAAGACTATCTGCGGCCTCTTTGTTACAATCTCAATTTTTTGTATCCATGTGCG  
CAGTTAGGCCGGATTTCAAACAGCTCCTATATCACCGGGGAAGCAATTTAGACAAAATAGCT  
AAAGTTCCCTATAGAGTTTTAGATGCCCCATCATTAGCAGACGATTTTTACTACAGCTTGAT  
AGATTGGTCAAGTACTGATGTTTTGGCAGTTGCTCTTGGAAAATCGATTTTTTTAACCGATA

ATAACACTGGCGACGTTGTTCACTTATGCGACACGGAAAACGAATACACAAGCTTAAGCTGG  
ATTGGAGCAGGCTCTCATCTGGCAGTAGGTCAAGCAAATGGACTTGTAGAAATTTATGACGT  
AATGAAAAGAAAATGTATTAGGACGTTGTCGGGACATATTGACAGAGTAGCGTGTATCTT  
GGAATAATCATGTTTTGACGTCTGGGAGTAGAGATCATCGAATACTGCATAGGGATGTTAGG  
ATGCCAGATCCCTTTTTTGAACCTATAGAATCGCACACTCAGGAAGTCTGTGGCCTAAAGTG  
GAATGTAGCGGACAACAAACTTGCCTCAGGTGGTAACGATAACGTCGTCCATGTTTACGAAG  
GAACGTCGAAATCTCCAATCTTGACGTTTGACGAACATAAGGCTGCTGTTAAGGCAATGGCC  
TGGTCTCCTCATAAACGAGGTGTGCTAGCTACCGGTGGTGGTACAGCAGATAGAAGACTAAA  
AATCTGGAACGTTAATACGTCAATAAAGATGAGTGATATAGATAGCGGCTCTCAAATATGTA  
ATATGGTATGGTCAAAGAATACTAACGAGCTTGTGACATCACATGGTTACTCAAATATAAC  
TTAACCTTGTGGGACTGTAACCTATGGATCCAATTGCAATTCTGAAAGGTCATAGTTTCAG  
GGTCTGCATTTAACGTTATCCAATGATGGAACCACGGTGGTTTTCTGGGGCTGGAGATGAAA  
CATTGCGATATTGAAACTTTTTGATAAACCAAAGCGAAGGTACAGCCAAATTCGTTAATA  
TTTTGACGCATTTAATCAAATACGTTAG

>YNR056C 0.77 Cold

ATGAACAGAGTAGGGGCAGTGTTCCCTATTTGTATATGAAAGAAATTTTTTTTTTGTCTATTGT  
TCCAGATCGTACAGGACGGAAATAAGAATGTCTAGTTTCCAGAAAGGTCAGAAGTCAAGTTTG  
ACAAGCACTTTAATTGGTGGTCCCTATTAGGTATCGCGTTCTCATTAAAGTTGCTCATGGGTC  
GGTATCTCAGCGTCGATGGCCGTTGGTATTGCCAGTGGAGGGCCACTGCTTATCATCTATGG  
GTTGATAATTGCTGCTTTTTTTCAGTCTCATGTGTGGTATATCTCTGGGAGATTTTTGCTGCTA  
TCCTGCCAAACAGCAGCGGTGGTTCATTTTTGGGTTCTTAAAATGTTGGAACAAGAATCAGTC  
ACTTTGAAAACCCCTGAGTACGAGGACCCTTCTGACGATGATGAAGAAGTGTTCCTCGAGAA  
TTATTGTCAAACCTTCAACGTGGAAGTTTCTTCTAAATTTCAAAGGTTTCTTCCATGGTTG  
TAGGGTTGCTGAACTATTTTCGGTGCCATTTTTTACTACCGCAAGTATCTGCTCATCTTTGTCA  
ATGAGCTGTATCGGTATTACATAAGTTGTTGCATCCGGACTACGAGTTAAAGCACTGGCATGT  
TTTTGTGGGTTACGAGTGTATCAATGCCGTTTTGACACTTTTCAACATTTATTCAACTCCGT  
TGCCCTATATCTCTCAGTTTTGGGCTCTATACGTCTCTATTGTCTTTTCGCCATGACTTTCATT  
ATTTGTATTGTTTCAAGATCTGACAACACCGTAGACCCATGGCCCAAAGCTTCTAATATATT  
TGGGAGCTTTGATAATCAAACAGGCTGGAATTCGTCTGGAATGGCGTTTGTGTCGGTTTGG  
TCAATCCGATCTGGGCATTTGTTGGCATTGACTCTGCTACGCACATGATTGATGAAGTGGGT  
TATAGTAAGTCACGTTTTCTTAGTTCCCAAAGTTATTATCACTACCATCATTTGTGGGCTTTGT  
AACTAGTTTTTATTTATTGCGTTGGTTTTGTTTTCTGCATCACTGACCAAACGGCAGTCGTTG  
AGTCTATTTTTACCTATCGTAGAAATATTTTTACCAGGCCACTGGTAATAGGAATCTCAGTGTC  
TTCTGCAATGTATGTGTATCACAACAGGTTTTGTTTTCAGGCATTGCAAGTGGAACTGGCA  
AAGTCGAATCCTCCAATCATTCGGGAAAAGTTACGCACCATTTTTATAAAGAGGGTTCCCTTGG  
GAAACAAATCCTTGAAGAAGCTAGCAGTGTGACACCTGGGTTTTAAGTCTCCATTATATGCC  
CATTTTTTGTACAAATATGTGTAACGATAATTGGCTGTATATTTATGGGATCTAGTACCGC  
TTTCAACGCAATTACTGCACTGCATCACCCTGTTACTAATGTGTCGACGCAGTTCCTTCTT  
TTATATTCCTGTTTCTGTTATTTAAAAGGAAAAATTCATTCATAGAATCGAGAGTGACGTAAT  
TGTGTCAGCAGGCCAACCCTGTCGTATGTCTATGATTCCCTCATATTATATGTATTCTATG  
GACCTTGTCTGCCTGGTATTTTTATCTTTCCCATATACTACTACCGGTTACTGCAGGAAACA  
TGAATTACACCTCAGTAGTGTATGCAGTAGTTTTCTGCATTATCAGCATCGTTGTTTTCCCT  
ACATGCATCTAA

>YDL094C 0.81 Cold

ATGGCAGTAAATATCAGCAAACAGCCAACTAGAAGCTTTTCCCTTAGATGAAGTAACTGTTCCG  
TAATGAACTCAAATTTATCACAGGGTTTTGTTATGAGAAAAGACCTCAAAGGGCCGCGTTTAA  
TAGTCACATCGGGGATGGGATCCACCTTCCAGCAAATGCTCTTTATTTCATCTTTAAAGCAGTT  
ATGATCTTACACACCTGCTTAATTGTTAAATCAATAAGAATATTTTCGAAAAAGAAGAAAAG  
AAACGGGTCTATGCATAATATGTACTACGCTTCTGTTCCCTTTTCTATTGTTCTCGAATGCCT  
ATTCGATAGACTTTTCGCGGCACGTAAACGAGTTCCTGGAAAAAAAACGGTGCGAATGATA  
ATACCACTGAAACTACTTGCAGATCATACTTATTTGAGCGAAATAGAATACGTGTCTCTAAA  
CGCAGATGGACAATATAGTCAGCTTCAAGACATTTTTTTTTTATTTCATGATGTTTTTTTTGTCT  
ATTTTCGTTTTTTAA

>YLR017W 0.8 Cold

ATGAACAGGATTAAGAATACATTTTCTGTTGCTAAGAGATTAAACTAAGCAAAGTTATGAC  
 GAACTCAGAATTACCGAGCATATTCGAAGGAACTGTTGATTTAGGGATTATTGGTGGTACAG  
 GTTTATATAACCTTGACTGTCTGGAGCCCATCGCTTTGCTTCCACCCATGGTAACACCATGG  
 GGTACCACATCGTCTCCTGTCAATCTCTCAGTTCGTAGGAACTAACAGCCACTTTCACGT  
 TCGTTCATAGCCAGACACGGTATTAACCACGAATACCCACCCACTAAAGTCCCATTTAGAG  
 CAAACATGGCGGCCCTTAAAGAACTTAAATTGTAAAGCCGTTCTTTCTTTTAGTGCCGTGGGG  
 TCTTTACAACCCCATATAAAGCCTAGAGATTTTGTGTTACCACAGCAAATAATCGACAGAAC  
 TAAAGGCATAAGACATTCTTCATATTTCAACGATGAAGGCTTGGTAGGTCACGTTGGTTTCG  
 GACAGCCGTTCTCTCAAAAATTCGCAGAGTATATCTATCAATTCAAGAACGAGATAACAAAT  
 CCTGAATCCGAAGAACCCTGCCATTTGCATTACGACAAGGATATGACCGTTGTGTGTATGGA  
 AGGCCACAATTTCTCCACGCGCGCTGAATCCAAGATGTACAGAATGTTTGGTGGCCATGTTA  
 TTAACATGAGTGTATTCCAGAAGCCAAATTGGCGCGTGAGTGTGAGCTGCCTTACCAGATG  
 ATTTGTATGTCTACCGATTACGACGCATGGAGAGATGAGGCAGAACCCTGTTACCGTAGAAAC  
 CGTTATTGGTAATTTGACGAATAATGGGCGCAATGCAAAATTTTTAGCTTCTAAGATCATCG  
 TCTCAATGGCCAAGGAAATCCAGAGTTCATGCATACTGGCGATGGGCTGCGCGGTTCCATC  
 AAGAAATCTATCTCTACCAAACCAGAGGCTATGTCCAAGGAAACCTTAGAAAGACTAAGATA  
 CTTATTTCCAAACTATTGGTAA

>YIR010W 0.71 Cold

ATGAGTCTGGAACCCACACAAACGGTCTCCGGTACGCCGCGATGCTGCATCAAAGAACACA  
 CAAACAAGTATACCCATTGCGGATGGAAACTATCCCAATATTGGAATCCGACTCCAAGGCTA  
 CTCTACAAAGCAACGAGCCACCCAGAAAGATGAGGAGGAGACCGAATATTTTTGAGAAATAAA  
 CAATCCGTGTGCAATTTGAGCCCGATTTGAAATTCAAAACGACACAAGAATAAACATATCCA  
 GGGGTTCCCTACTCTGGGCGAAAGGCTGGATAACCTGCAAGATATAAAAAAGGCCAAGAGAG  
 TGGAGAATTTCAATTTCTTCTGCGCCAATTGCTGACGACAATCATAGTGGAGATGCGACTGCA  
 AATGCGACTGCAAAATGCGACTGCAAAATGCGACTGCGAATGTTAATGCAAGTGAATGCCCGC  
 TCCATATATGCCCTTATTACTATTACTACCATCCGATGAATGCACCAACTCCTGCAATGATAC  
 CATATCCTGGATCACCAATGCATTCGATTATGCCCAACTCCTCATTACAGCCCTTTTATTCG  
 CAACCCACTGCTGCGAGGCGGTCCCAGATATGACTACTCCCCAAAATATATCTTCATCACACA  
 ATTGCTGCCAGCTCCGCAATTGTTTCCGTACGGATCATTCCATCAACAACAACCTTCAGCAAC  
 CACACTACATTTCAACGAACAAGGAAAGGAAAAAATCAATCGGAAGTCAGAGAGGTAGAAGA  
 TTGTCTATGTTAGCATCTCAAGCTAATGGGGGAAGCACTATTATATCTCCGCACAAGGATAT  
 TCCTGAAGAGGATTTTTACACCGTGGTTGGAAATGCGTCTTTTGGTAAAAATTTACAAATAC  
 GACAGCTTTTCAACTGGTGTTTAATGAGATCTCTGCATAAATTTGGAGTTGAAGGCTAAAAAC  
 CAAGAGGAAGAAGGGAACTTGAACATCTGACCAAAAAATCCAAGCTCGAATCAACAAGGC  
 AGAACTGATTATGTGGATCCCAAACGTCTGGCTATGGTGATAATAAAAGAGTTTGTTCGATG  
 ATCTTAAAAAAGATCATATTGCGATAGATTGGGAAGATGAGGAAAAATATGAGGATGAAGAT  
 GAGGAGAAGATTCTGGATAATACTGAAAACCTACGATGACACGGAACCTGCGACAACCTGTTTCA  
 GGAAAACGACGACGACGACGACGACGATGAGGTGGACTACTCGGAAATACAGAGGTCTA  
 GACGTAAATTTAGTGAAAGGAGAAAAGCCCTACCGAAAGAACCAAAAAACTATTACCTAAT  
 AGCAAAAACGTGAAAACACAAAGAATCTTAGCATTTTAACGAGCAAGGTGAACGCGATCAA  
 AAATGAAGTGAAGAATGGGCAGTCACTTTAGACACTTCGAGACCAGATCTTGAATGGCAAG  
 AATTGACTTCATCTCATCACACCCTGGAACCGTTGTTCGGATACAGAAGAGCCAGACCTT  
 GCGATTGCAGATGTTGAGACAAAGTTAGAAAACAAAAGTCGATGAGCTAAGGTACCAGTCGCA  
 TATATTAACCTCGCACTCACTAGCCTTAAACGAAATAACAAATTCAAAAGTGAATAAATGA  
 ACATAGAAAACATGAGAAAGATCTCAAGCGAAACGGACGATGACCACTACAAGTGATTAAT  
 CCTCAACAGCTGTTGAAGGGATTAAGTTTATCTTTTCAGTAAAAAACTGGATTTATGA

>YJL033W 0.8 Cold

ATGGCCAAAAAAATAGATTGAACACAACCTCAAAGAAAGACTTTACGTCAAAGGAAAGATGA  
 GTACATCGAAAACCTGAAAACCAAATTTGATGAGTATGACCCTAAGATAACCAAGGCCAAGT  
 TTTTCAAAGATCTCCCATTAGCGATCCACATTTAAAAGGTTTAAAGAGAATCATCCTTTATA  
 AAACCTTACTGAGATCCAAGCCGATTCTATTCCCGTGTCCCTGCAAGGTCATGATGTATTGGC  
 GGCCGCAAAGACAGGTTCCGGTAAGACATTAGCATTTTTAGTTCCAGTAATTGAAAAGCTAT  
 ACCGCGAAAAATGGACCGAATTCGATGGGTTAGGTGCCCTTATCATATCTCCAACAAGAGAG  
 TTGGCTATGCAAAATATATGAGGTTTTGACGAAAATAGGTAGTCACACTTCATTTTCAGCTGG  
 GTTAGTTATCCGGTGGTAAAGATGTTAAATTCGAACTAGAAAGGATATCAAGGATTAACATTC

TTATCGGTACACCTGGTCGTATTTTACAACATTTAGATCAAGCCGTAGGTCTAAATACTTCC  
AATTTGCAGATGCTTGTCTTGACGAAGCTGATAGATGTTTAGACATGGGGTTTTAAAAAAC  
TCTGGATGCCATCGTAAGCACATTTGTACCATCTAGACAAACACTTTTTATTTTCAGCGACTC  
AATCACAATCTGTTGCAGACTTGGCTAGGCTTTCCTTGACAGATTATAAAACCGTTGGTACA  
CATGATGTGATGGATGGGTCGGTTAACAAAAGAAGCATCTACTCCAGAAACTTTGCAACAATT  
CTACATTGAAGTTCCTTTGGCAGATAAAATTGGATATCCTTTTCAGTTTTATAAAATCACATT  
TAAAATGCAAAATGATCGTTTTCTTATCAAGTTCCAAACAAGTGCATTTTGTCTATGAGACA  
TTTAGGAAGATGCAGCCTGGTATTTCTTTAATGCATTTACACGGTAGACAGAAACAACGTGC  
TAGGACAGAAACTTTGGACAAATTC AATCGTGCTCAACAGGTGTGTCTTTTTGCTACCGATG  
TCGTTGCTAGAGGTATTGACTTTCCTGCAGTCGATTGGGTTGTTCAAGTGGATTGTCCAGAG  
GACGTTGATACATATATCCACAGAGTCGGTAGATGTGCTCGTTACGGTAAAAAGGGTAAATC  
TTTAATCATGTTGACTCCACAAGAGCAGGAAGCGTTCCTAAAAAGACTTAACGCTAGAAAGA  
TCGAACCAGGCAAACCTTAATATAAAACAGTCAAAAAAGAAAATCCATTAACCACAATTGCAG  
TCATTATTATTCAAGGATCCAGAACTAAAATATCTAGGACAAAAGGCTTTTATATCGTACGT  
GAGATCTATATATGTGCAAAAAGGACAAAACAAGTTTTCAAATTCGATGAGTTACCAACAGAAG  
AATTCGCTTATTCTCTTGGTTTACCAGGGGCCCCAAAAATCAAATGAAGGGTATGAAGACC  
ATTGAGCAGGCCAAAGAAAAGAAAAGTCTCCAAGACAGCTAGCTTTCTTATCAAAAAGCAA  
TGAAGATGGTGAAGTAATTGAAGATAAGTCGAAACAACCAAGAACAATAATGATAAAAATGT  
TTGAACGTAAAAAATCAAACCATCTTAAGTGAACACTATTTGAATATAACGAAGGCTCAAGCA  
CAAGAAGACGAGGATGACGATTTCAATTTCTGTCAAGCGTAAAGATCATGAAATAAATGAAGC  
TGAGTTACCAGCTCTAACTCTTCCAACCTCAAGGCGAGCACAGAAGAAAAGCGCTTTCAAAGA  
AGGCATCTCTGGCCTCCAAGGGTAACGCTAGCAAATTAATATTTGATGATGAAGGCGAAGCC  
CATCCAGTTTTATGAACTTGAAGATGAAGAAGAATTTTATAAGAGAGGTGATGCGGAGGTACA  
AAAGACAGAATTTTTAACTAAAGAATCTGCAGTAATGGCAGACATTGACAATATTGATAAGC  
AGGTGGCTAAAGAAAAAAAACAAGAGAAGAAGAGAAAAAGACTAGAAGCCATGAGAAGGGAA  
ATGGAGGCTGCTATGGAAGAAGAAATTTCTGGAGATGAAGAAGAAGGGAAGACAGTAGCATA  
TTTAGGAACAGGAACTTGAGCGATGATATGAGCGACGGTGATATGCCTGACTCGGAAGGCC  
ACTTGA AAAAGAAAGCTAGA ACTGTTGACTATTCACACGGCCACAATCCATCCAATTCAGTT  
GATGATGACATTATTGAAGTGAAGAACCACAAACTTTGGAGGATTTGGAATCTTTGACAGC  
TAAATTAATCCAGGGTTAA

>YFL042C 0.8Cold

ATGTCGGATGTAGATAACTGGGAACCCGTATCAGATAATGAGGACAGTACTGATTCTGTGAA  
ACAATTTGGGTCCCCCTTTGAGCATGCAAGTAACAATGACAATGCCGGCGATACTGAAGCTG  
AGTCACTGCAAGAAGTGCCCCATAATACAGAGACCAACGACGTACGCAAGAATTTAGTAGTG  
ATTACAAACCAAAGTGCCGCGCATGAACACCCCTACAGAGATCAAGCACGATCAATCAAGGAC  
TTCTTCGACGTCCTCGTTCTTCAGTGAATGATCTCTTCGTTTAAGTCAAACGTGCCATCCC  
CAGTTTCTAGATCAACTACGCCAECTTCGCCAGTTTCGCAACCAAGCATTATATCACATAGA  
AGGGAGCCTTCCATGGGGTCCAAAAGAAGATCAAGCCGCGTATCAGTAATGCCACAATTGC  
TGAAATAGGCTCTCCCTTGCAACAGGTGAAAAAGCCTGATGAGGTCAAGACAAGACTCACTC  
CTTCCCAAATGAAAGAAGACAATTACGATCATAGACGATTCGTGGAAGAAGCTTACATGGAC  
ACACCTTATCACTATGCGTCTGAGCAAAGAAATAAAGACTTTCATGAGACATTCAAGTCCGT  
TCCTAAAGATGACAGACTACTGGATGATTTAATTGTGGGCTGAATAGAGAGCTGCTTTACC  
AGGGGAAACTATACATAACAGAAACGCATCTCTGCTTCAACTCCAATGTTCTTGGTTGGATT  
GCTAAAGTACTGATTGCGTTTGAAGATGTCACGTTTATGAAAAAACTTCTGCTGCTGGGTT  
GTTCCCCAGCGCAATATCCATCGAAACAAAGATGGGCAAACTCTCTTTAATGGTTTTATAT  
CCAGGGATGCTGCATTTGGATTAATGAAAGAAGTGTGGTCAAGAACCCTGTTGCAGAAGGAC  
ATGGCCAGCGAAAACATCAATACTAAAGCAGAAAAGTCAGGAAATGGCAAAGAGATTGATGA  
TGCAATAAACTCCATCGATGAGGAAAACAATGATAAAGACGCTAATGATAATGACACTAATG  
AAAATGACGATGAAAATATCTCTACAAATGAGACTACCCCAATAGTACGAGTTCTCTCGCCG  
GATAAAGAAAAAGAGAAAGCGTATAAACTGCGTGCCGATTCCTCGTATCAGTATGATGGTCC  
AATATATCATCATTCACAAGCTTTCCGGCTGAACCTATGGCCAATAACGAGTTTGTCTCA  
AGGAGTTACCATTGATTTGTGCACCTGGTATACTTTTTGAGATCATGTTCAACTCAGAGCAA  
AACGAATTTCTCTAGATTTTTTACGGGGTCAAGAAGGTTACAAAATTACCACTATTCCAAA  
TTTCACGAGCATTGACGGATCTTCCATGACTTTGAAGCGTGAGTATTCATACGAGAAAAGCAT  
TGCATTTCTCTGCGGGGCCAAGTCCACGACATGTTATGTTGCTGAGGTAATAAAGAGAAAA  
GATCCTGATACTTACTATGAGGTTATCAGTAGCATAACGACTCCGAACGTGCCAGTGGTGG

TAGTTTCTCAACTAAGACAAGGTATCTAATCCGTTGGAATGACGAAATAACGTGTCTGTTAC  
 GGGTATCCTTTTGGGTGGAATGGACTGGTTCCAGTTGGATCAAAGGTATGGTTGAAAATGGA  
 TGCAAGAATGGTCAATTGGAGGCTGCGCAATTAATGGAGCGTATTCTTCCAAAGTTCATCAA  
 GAACAATGTGCAAGAGTGCCAAATTAATCAGCAAGGAGGAAGAGGAGCAAGATGATAAAG  
 AAGTAAAAATAAGTTGAAAGAGGTTGACCTTGAACAACCAAGAGAAGCGGTTGTTACGGCT  
 CCCGCAATTGCAGAGCAGCAAGGTCTCAAGGTCACCATGGAAACATGGTTGTTCTTATACTT  
 GATTGTGGTCGTTTGTCTATTGTTAATCTGTTCTACATACGTTCAATTGCTGTCTCATTA  
 ATCAACTGGTGAAGCTGCAATTGGTAGAACTGAAGTTGTGA

>YOL131W 0.8 Cold

ATGAATACTAATAAGATAGCACAAAGACGAAGTCCAAGATAAGGTTTTGCAAAGAGCAGA  
 AGCACATTCTGTATGGAACCTAAGGTTCAACCTCAGTAAAGTTGCCAAACGGATTTCGCATGG  
 AAACAAAGGTATTTCCAGAGATAAAGATAAATGACGCGCAATCACAGTTAGAGCGATCTAGG  
 TGTAGAATATTTAGCCCTGACCTGGAGGAAGAACATGTGCCCTTGATTCAAGGCTTTAAATG  
 TTTGGATTACCCCCCTCCCGTTCACCAAGCTCATCGCAGGGGGAGGATGAAGAGAACACGG  
 TAGATTTCGCAATACTAG

>YHL043W 0.75 Cold

ATGGAGGGCCGCAAAGTGAAGATGAAAAGAACGAAGCCGCTTTAGCCTGTGATGTCTTTGA  
 ATCCTCCAATGCCAAACTACCAAAGAATGTATTCAGAAGTTCCTTTACTTGGTATTGCTATG  
 AAGTTATCAATAGGTCAGCATTCCATATTTGGTTATTGTTATGTTTAAACGCTCATTGTTGGT  
 TGGAAAGTTTTTTTCAGGCATCGGTGGTAGAAGACCATCTGACTCAAACATGGACGGCCCCCA  
 AACCAAACATAAACGGAATCCAGGTTTTTTTGAGGCGTCATTGACCATCGTTATCTTAGTTA  
 TATCTTTAGCAGTGTCTTTCTCATGGGAAGCTTTCAAATGTATCGTGAACGCACCTTCGGG  
 AAACAAATCACTCAGTTTGCCAAAGAAATTAATAAAGTGCGCCAAGCACAGATATGGAAAG  
 CTGGGACCGTGTTCAGCGGATTTTAACTCTTATATGTACGAAAATAAACTTTGGAACACAG  
 AATACTTTTTTTTGTGA

>YOL165C 0.81 Cold

ATGGCTAGGCATTTCCGGTATGGCCCTCGCCCCATGGGATGTCATGGGAGGTGGAAGATTTCA  
 GAGTAAAAAGCAATGGAGGAACGGAGGAAGAATGGAGAGTGTATTCGTTCTTTCGTTGGCG  
 CCTCCGAACAAACAGATGCAGAAATCAAGATTAGTGAAGCATTAGCCAAGGTTGCTGAGGAA  
 CATGGCACTGAGTCTGTTACTGCTATTGCTATTGCCTATGTTTCGCTCTAAGGCGAAAAATGT  
 TTTTCCGTCGGTTGAAGGAGGAAAAATTGAGGATCTCAAAGAGAACATTAAGGCTCTCAGTA  
 TCGATCTAACCGCCGACAATATAAAATACTTGGAAAATGTAGTTCCTTTTGACATCGGATTT  
 CCTAACACTTTTATCGTGTTAAATTCCTTGACTCAAAAATATGGTACGAATAATGTTTAG

>YLR362W 0.75 Cold

ATGGAACAGACACAAACAGCAGAGGGCACTGACTTACTAATTTGGTGACGAAAAGACCAACGA  
 TTTACCTTTTGTGCAGTTATTTCTGGAGGAAATAGGATGCACTCAATACCTGGATAGCTTTA  
 TTCAGTGAACCTTGTACAGAGAAGAATAAAGTATCTCGACAAGGATATCCTCATTTGCT  
 TTGGGTGTAAACAAAATAGGAGACAGACTCAAATTTAAGGAAGTCAAATCGTTCCAGAG  
 AGATAAACGGATTGAACAGGTGAATAGATTGAAAACCTGATGGAAAAAGTAAGCTCTCTAT  
 CCACTGCTACGCTATCGATGAATTCAGAATTGATTCTGAAAAGCACTGTGTTATATTTATC  
 TTAAACGATGGTTCCGCTAAGAAAGTTAATGTAAATGGTTGCTTTAATGCAGATTCTATTA  
 GAAAAGGCTAATCAGAAGATTGCCACATGAATTATTAGCCACAACTCCAATGGAGAAGTAA  
 CTAAAATGGTCCAAGATTATGATGTGTTTGTCTTAGATTATACCAAGAACGTACTGCATTTG  
 CTATATGACGTGGAATTAGTCACTATTTGCCACGCAAATGATCGTGTGAGAAAAATAGGCT  
 AATTTTTGTTTCCAAGACCAAACACCAAGTGATAAAGCTATATCCACATCCAAAAAATAT  
 ATCTAAGAACGTTGAGTGCATTGAGCCAGGTTGGGCCATCCTCGTCAAATTTGTTGGCACAG  
 AACAGGGGATTTTCGCATAACAATGCTGAAGGGAACTCCGGATCGACAACACAGAAAAGGA  
 CAGAATTAGACAGATTTTAAATCAGAGGCCCTCCTAGCGAATTTATTTCTACCAATTTGGCCG  
 GATATTTTCTCATAACAGACATGAAGCGGTTGCAAAAGACGATGAGAGAGTCATTTCCGCAT  
 TCAGCAAGGCTAAGCATTGCTCAAAGAAGACCTTTAAGTGCAGAATCAAATAATATCGGTGA  
 CATACTATTGAAACACTCAAACGCTGTTGATATGGCCCTATTACAAGGATTAGATCAGACAA  
 GATTAAGCAGTAACTTGACACAATAAAATCCGAAGCTTGCCATAAAAGGCCAGAAAGAT  
 AATGATGCCATATCTAACAGTTAGAATAAAGTGTAGAGTCTGGTGAAGAAGAAGATCA



CGATTTCTTTGGGGAGGACAGTGACATTGTTTCATTACCGACGAAAATTGCCACGCCCAAGA  
ATTGGTTAAAAGGTGCTTGCATTGGATCAGGCAGTTTTGGGAGTGTTCATTGGGCATGAAT  
GCTCACACTGGTGAACATAATGGCAGTAAAGCAAGTGGAGATAAAAAATAATAACATTGGTGT  
TCCCACAGACAACAATAAACCAAGCCAATTCTGATGAGAATAATGAGCAGGAGGAACAACAAG  
AGAAAATAGAAGATGTTGGGGCGGTAAGTCATCCAAAAACCAATCAAAATATTCACAGAAAG  
ATGGTTGATGCTTTACAGCATGAAATGAATTTATTGAAGGAGTTACATCATGAGAACATTGT  
TACTTATTATGGTGCTTCTCAAGAAGCGGAAATTTAAATATTTTTCTGAATACGTTCCCTG  
GGGGTTCGGTTTTCCCTCCATGCTGAATAATTACGGTCCATTTGAGGAATCACTGATTACTAAT  
TTCCTAGGCAAAATACTGATTGGGGTTGCGTATTTGCATAAGAAGAACATTATTCACAGAGA  
TATCAAGGGTGCAAATATTTTGATTGATATCAAAGGTTGCGTAAAAATTAAGTATTTTGGTA  
TTTCAAAAAAATTATCACCTTTGAATAAAAAACAAATAAGAGAGCTTCTTTGCAAGGTTCC  
GTATTCTGGATGTCACCAGAGGTGGTCAAACAGACCGCTACTACTGCTAAAGCGGATATATG  
GTCTACAGGATGTGTTGTCATTGAAATGTTTACCGGTAAGCATCCTTTCCAGATTTTTCTC  
AAATGCAAGCGATCTTCAAAATAGGCACAAACACGACCCCGAGATACCTTCCCTGGGCTACG  
TCAGAAGGAAAGAATTTCTTAAGAAAGGCATTTGAGTTGGATTATCAATACAGGCCTAGTGC  
CCTTGAATTGCTGCAGCATCCATGGCTGGATGCACACATAATTTGA

>YOR257W 0.76 Cold

ATGAGTAAGAACAGGTCATCGCTACAGTCTGGTCCACTTAATAGCGAGTTATTGGAGGAGCA  
AAAGCAAGAAATATATGAGGCGTTTTTCATTGTTTCGATATGAACAATGATGGGTTCCCTCGATT  
ACCACGAGTTGAAAGTAGCAATGAAGGCCCTGGGATTTGAGCTACCCAAGAGAGAAATACTT  
GACTTAATAGATGAATATGATAGTGAGGGGCGGCATTTGATGAAGTATGATGATTTTTATAT  
TGTAATGGGGGAAAAAATATTGAAGAGAGATCCGTTAGATGAAATAAAAAGGGCATTCCAAT  
TATTTGATGACGACCATACTGGGAAAAATAAGTATTAAAAACTTGAGGCGTGTAGCTAAAGAA  
TTAGGAGAAACTTTGACGGATGAAGAGCTGAGAGCGATGATTGAAGAGTTGATTTGGATGG  
TGATGGCGAGATTAATGAAAACGAATTTATAGCTATTTGCACCGATAGTTAA

>YNR024W 0.78 Cold

ATGAGTGCTAACCAATGGTGTCACTGGCAAACCTCTCTAGTAGAGTCATGAATATGAAGTTTAT  
GAAATTTGGTAAGACGGATGACGAAGAGAGTTCCAACCTCCAATACGCCGTCTAATATCAACT  
CAGATGTGGAACCTATAGAGCAGAAAGGTAAACTCTTTGGTCTGGATGACTCAGCGTGGGAC  
CTCAATAGCTACAAAGATGATTTAAAAAATTTTCAGGTAAGGAGAAGAAAAAGGTGAAAAG  
AGTAGTATATAAGAAGCGACCCAATCTCATAATCTCCAACGTTGGTTACAGTGAACCTGCGAA  
AACCTGAGGGTGTGATAAGTGGGAGAAAAACCTTTGGCGATAATTCTGATGATAGTGGTTCC  
AGGAAGAGAAAGTTTGATGAAGGCGAACAAAATGAAGACGAGAAAAGGGATGCTAAGGATAA  
GGAATTTACAGGGAGCCAAGACGATGGAGAGGATGAATATGACCTAGATAAATTTAAGG  
ATAGCATCAAAAAGAAAAGACCAACCATAATGGTAAAAATAAAAATAGAAATTCAAAAAG  
TAG

>YNL003C 0.73 Cold

ATGAATACTTTTTTCTTTCTTTGCTAAGTGGCGCCGCTGCTGGTACCTCTACGGATTTGGT  
TTTTTCCCTATAGACACAATTAACCAGGCTTCAAGCTAAGGGTGGATTCTTTGCTAATG  
GAGGATACAAAGGCATATATCGTGGTTTTGGGAAGCGCTGTTGTAGCATCGGCGCCAGGTGCT  
TCATTTTCTTTATTAGTTATGATTATATGAAAGTAAAAATCAAGGCCATATATCAGCAAAC  
TTACTCACAGGGATCTGAGCAATTGATTGATACGACAACGCACATGCTTTCCTCTTCCATTG  
GTGAAATTTGTGCTTGTCTTGTTCGAGTTCCCGCAGAAGTCGTTAAGCAAAGGACGCAAGTT  
CACTCTACCAATTTCTTCCCTGGCAGACTTTACAGTCAATTTCTACGAAATGACAATAAGGAAG  
TTTAAGGAAAAATCTTTATAGAGGGTGGTCTACCACCATTATGAGAGAAAATACCGTTACTT  
GTATACAGTTTCTTTATACGAGTATCTAAAAAAGACTTGGGCAAAAGCCAATGGCCAAAGT  
CAAGTGGAGCCATGGAAGGGGCTATCTGCGGTTCTATTGCGGGTGGGATCGCAGCAGCTAC  
AACGACACCATTAGATTTCTTGAACCAGATTAATGCTCAACAAAACAACCGCCTCACTTG  
GAAGCGTTATTATTAGGATTTACAGAGAGGAAGGTCCTGCTGTATTTTTTCAAGTGGAGTGGG  
CCCCGGACAATGTGGATCAGTGCAGGTGGTGCATCTTCCCTAGGCATGTATGAAACTGTTCA  
TTCGTTATTATCGAAAAGTTTTCCAACGGCTGGAGAAATGAGAGCGTAA

>YOR004W 0.79 Cold

ATGCGTCAAAAGAGGGCTAAGTCATATAGGAAACAACCTTCTTGTTTACAGTCACACATTTAA  
 GTTCCGTGAGCCATATCAAGTTTTGGTTGATAATCAGCTTGTTTTAGAATGTAATAATTCTA  
 ATTTAATCTACCGAGTGGGTGAAAAGAACGTTGCAAGCAGACGTAAAGGTCATGATCACA  
 CAGTGTTGCATACAAGCGTTATATGAAACTAGAAATGATGGTGCAATTAATTTAGCGAAACA  
 ATTTGAGAGACGTCGTTGTAACCACTCTTTTAAAGATCCAAAGTCACCTGCGGAGTGCATCG  
 AAAGCGTCGTTAATATTAGCGGTGCAAATAAACACAGGTATGTGGTTGCTTCTCAGGACATA  
 GATTTGAGGAGGAAGCTGAGGACGGTTCCGGGTGTTCCATTAATCCATTTAACCAGGTCTGT  
 TATGGTTATGGAACCTCTCAGTACGGCGAGTGCCAAGGCAAGCAAGATTACTGAAGAACAAA  
 AATTGTATAAGGGTCTCAATGATCCTAATATTGAAAACTTCAAGAAAGTGGTGATGGATCA  
 GGAAAGGAATCTATCACTAAGAAAAGAAAGCTTGGTCCAAAGGCTCCTAATCCTTTGAGCGT  
 AAAGAAGAAGAAAGAAAGTCAACTCGCCAGCGATGAGGTGAAAGACAAAAGATACTTCTA  
 AAGAAAAGAAAAAAGAAGAAGGAAACACAAAAGCAACACTAACGTCCTCCGTTTCAAAT  
 GGGACCACAGCCGCGCAGTAA

>YFL001W 0.78 Cold

ATGAGTAATTTTCATTAGAAAGGCTAGTTGGGAAAATGAAAGCGATTTCAACAGGTACCAATGC  
 TATTGTTAGTAAGAAGGACTCCATTTACGCAAACCTGGTCCAAAGAGCAGCTAATACGAAGGA  
 TCACTGAACTAGAAAACGCAAATAAGCCACATTTCTGAAAAATTCAGCACATCGAGGATAAC  
 AAAAAGCGCAAAATTTTCGCAAGAAGAGGTTACGAGAAGCAAGGCGAAAAAGGCTCCGAAGAA  
 GTTTGACTTTTTCTAAACATAATACCAGGTTTCATCGCCTTGAGATTTGCCTATTTGGGATGGA  
 ATTACAATGGCTTAGCTGTTTCCAGAAGGAATACACACCGTTGCCTACAGTAGAGGGTACCATT  
 TTGGAGGCCATGAATAAGTGTAAACTTGTTCCTCGATGGTTTTTACAAGACTATAAATTTAG  
 CAGATGTGGCAGAACAGACAAGGGAGTTAGCGCCATGAACCAAGTTATATCGTTAGAAAGTCC  
 GTTCCAATTTAACAGATGAGGAACAGCGGGATCCGACCAACGACAGCAGGGAAATACCCCTAT  
 GTTCACGTTTTTAAATCAATTACTACCCGACGATATTCGTATATCAGCTGTCTGCCTCAGACC  
 GCCACCTAACTTTGACGCAAGATTCAGCTGTGTTTACCAGGCACTATAAGTACATCTTTAATG  
 GAAAAACCTTAATATTGAAAAATGTCTAAAGCCGCATCATATTTTGTGGAGAGAGAGAC  
 TTCAGGAATTTTTGTAAGCTTGATGGCTCAAAACAAATTACCAATTTTAAACGAACAATAAT  
 AAGCTCAAAAATTCCTCCCTTCTGAAACTTCTATTGTTTTGATCTCGTTGGTTTCCAGCAT  
 TCCCTATGGCACCAAGTTCGTTGCATGATGGCCATTCTTTTCTTAGTTGGTCAATCACTTGAA  
 GTGCCGGAATTTGCTTTCGCTCTGACTGATATTGAGAAAACCCCTCAAAGGCCTGTTTACGA  
 AATGGCAAATGATATACCATTATTGTTATATGATTGTAAATTTTCTGAAATGGATTGGCAAG  
 AACCTACTGTAGATGACTATAAGGCAATAAAATTCACGACAGCTACTGAAGCATTGACGTTA  
 CACTACGAACTTAAGGCCGAGTATGCAATATTTTTTAAAGATGTTTTGCCACAGCAAATAC  
 AAACAACCTTCTCAAAGACAATTATTAATTTGGGCGATGGAAGAGGTAAAGTAGTCGGTACCT  
 ATGTGAAACTAGAGGATAGAAGCGTTATGGAACCTGTGGAAGTTGTTAATGCTAAATACTCC  
 AAGAAAAGAACAACAAAATAAGTAA

>YLR031W 0.78 Cold

ATGCCGGTCTTAAATACGAGAACCTTCTTATCCCAATATCGACTTTCATGGTACTAAGGTTTC  
 TGATGTTCTAGATGCCTTTGAATTTGAAAAGCATGATGATCCCTTAAGGGATAAATGGAACA  
 CTTTACAGTTTTTTGGAAAAGAGCTTTGAATCTAAATTTGAATCTGCATCAGAGTTAATCCAA  
 GGAGGCGAGCTAGCTGCTATTAAAGAAAGAAATTTTCAATTAGCCAAACTAAATAATCTTTG  
 CTTTCGGGTACGAGAGTCCATCAAAGAAGACAAGACCTGGAGAAAAAGTTAAGAACTTTAT  
 CGCAGGACACTGACAACGAATTGCTTTTTCTGATGTTGGAAAATGAGAGAAGAAAGAAAAGT  
 TCAGTGATAATAGAGTTTTCTTCTGAGATAATCAGAGAGAAATCCAAAAGATTAAGTGCAGA  
 AGAGCAAGGCTTTGTAATCAAATGAAGTAAAACCCCTCATTCTGGACCTTTCTGCACGGA  
 TAAATAGATTGAATTCATTCTAGAAAACAAAATACTTGTATTAGAAGATTAAGTAATCAA  
 TAA

>YOL146W 0.72 Cold

ATGGGTTACTATGACATTGATGATGTCCTAGCAGATGGGACAGAGTTTCTTGTAATTTCA  
 ATATGATATTCCTGGTCTTGGTTATTTGGAAAACAACCCAGGACGACCCATAACGAAAAACA  
 CTAACCTAAGCCTGCCACTATGGTTAGCAAGAATCCTTGCAATTGTGGGTGGTGACGAAGCC  
 TTGGTAGATGAAGAACCTGTACCTTTTGTGGAACCTCCTGCCACCAGATATGTTTTCTACGAA  
 AGTTATGAACGCTATAAAGACCGATCCGGTGGCTCTGGACTTGCATTCCATAAATTCGCATT  
 TCTTCAGTCTAGCCATAAAATGGATAATGTTGTTTAGCGAAAAGAACTGGCCAATGTCGTT

AGTGAGCTACTTTTGCAACGTGCCCAAGAACTTAATCATCATGCTAGTAGTTTATCGATTGA  
 TCTCAATGCAGACTCGACCGGAAAAAATTCAGCGAACACTAATATAGCAACTAGCACATTTT  
 TACTGAAACTAGAAGAAATGGAGAAGGAGATATATAAAAAAGTCTCATGAATCTTATAAGGAC  
 ACGAAAAGGTGGATGTTTAAAAAATAA

>YDR324C 0.71 Cold

ATGAGCTCATCGCTACTTTTCAGTTTTTAAAGAAAAGTCAAGAAGCCTGAAAATACGAAACAA  
 ACCGGTGAAGATGACCAGTCAGGAAAGGATGATAGTGCATAGATGCAGATTTGTGGATTTC  
 CTCTGCCACAATCACATCTCTAGCATTTTTCACATAAATCAAATATAAATAAGTTAACTCCG  
 TCCGATTTGAGATTAGCTATTGGTAGATCTAATGGTAACATAGAAATCTGGAATCCTAGAAA  
 CAATTGGTTTTACAGAAATGGTTATCGAAGGTGGCAAAGACAGATCAATTGAAGGCCTTTGCT  
 GGAGCAACGTTAACGGCGAGTCTCTAAGGCTATTTTCTATTGGCGGCTCGACTGTGGTAACA  
 GAATGGGATTTAGCAACAGGTTTACCATTAAGAACTATGATTGCAATTCAGGTGTGATATG  
 GTCTATTTCCATCAACGATTCACAAGACAAGCTGTCTGTGGGTTGCGATAATGGGACGGTGG  
 TCCCTCATAGATATCTCTGGCGGGCCTGGTGTCTTGGAACACGATACTATTTTGATGAGACAA  
 GAAGCCAGAGTATTGACTTTGGCTTGGAAAAAGGATGACTTCGTGATTGGTGGTTGTTCTGA  
 TGGTAGAATAAGGATTTGGTCTGCACAAAAAATGACGAAAACATGGGTCTGCTATTACACA  
 CTATGAAGGTGACAAAGGCCAAAAAAGAATCAACTCTAGTTTGGTTCAGTTATATATTTACCA  
 AGAACTGATCAGATTGCCTCTGGTATTCTACAGGCTCCATTAATTTCTGGGATTTCCAGTT  
 TGCCACGCTAAACCAGTCATTTAAGGCGCACGATGCAGACGTAAGTGTCTAAGTACCGATA  
 CTGATAATAATTATGTTTTTAGTGCTGGTGTGGACAGAAAAATCTTTCAATTTTCTCAAAAC  
 ACTAACAAATCTCAAAAGAACAACAGATGGGTAAATTTCTTCTAATAGGTTGCTTCATGGAAA  
 CGACATTAGAGCAATATGTGCATACCAATCTAAAGGTGCAGATTTTCTAGTTTTCAGGAGGTG  
 TTGAAAAAACACTAGTCATCAACTCACTTACTTCTTTTTCTAATGGAACTACAGGAAGATG  
 CCAACTGTGCAACCTTATTCAAAGAATGTTTTAGTTAACAAAGAGCAACGCCTTGTGTTTC  
 ATGGAGCGAATCTACTGTTAAGATATGGACAATGGGAACCGATTCTAGTACAGAACAGAATT  
 ATAAGCTAGTTTGCAAGTTAACTTTAAAAGATGACCAGAATATCTCAACTTGTCTTTTATCA  
 CCTGATGGACAAGTTTTTAGTCGTAGGGAGGCCCTTACCCTAAAGTTTTTCATTTACAGCC  
 CGTAGGTAATAAATTTGAAAGTGACTAAACTAGATAATGACCTATTATTGAGAACCTCCACAA  
 AATTAGTCAAGTTCATCGATAATTTCCAAAATTTGTCATATGCTCTTGCGAAGATGATGATTT  
 ATTTGTGGATCTAGAATCTGAAGAAGATGAAAAACCGCAAGAAGTTGAACTTTTGGAGGTTAC  
 TTCAACTAAGAGCAGTATCAAAGTTCCCTATATTAACAGGATCAACCATTTGGAAGTAGACC  
 AGAACATTGCAGTAATTTCTCGTGGCTGTGGAGTCGTAGACATATTAGACTTAAAAGCAAGG  
 ATTTCTAAACCCTTGTCTCGTTTGAATAATTTTATCATCACCGCTGTTTCATATCAATACTTCTAG  
 AAAATCTGTAGTAGTAATTAAGTGCAGACAATAAGATTTTATGAATTCATATGAATTTGAATT  
 CGGAAGCCGAGAATGAAGATAGCGAAAGCGTATTAAGTCAATGGTCAAAAAACAATACGGAT  
 AACTTACCAAAAAGAATGGAAGACATTAAGAGAGAAGTGTGTAGGGATATTTTCAGACATAGA  
 AAATAGTAGCAGATTATGGTTTTGGGGGGCTACTTGGATATCAAGAATAGACTTTTGATGTTG  
 ACTTCCCTATAAATAAGAGAAGAAAACAGAAAAAACGTACACACGAAGGGCTAACTATCACA  
 GATGAAAGTAATTTTATGAACGACGAGGAAGATGACGAAGATGACGATATTGATATGGAAAT  
 CAGCGAAAACCTGAATGTATTATTAACCAAGGAAACAAAATAAAGTCCACAGATGTACAAA  
 GAAACGAAGAAAGCTCCGGTCACTTCTTCTTACTGATAAATAAACCCTTTACTGTTTGT  
 GACTTAATTTCTAGTAATGAATTGGCAATAATTGAAAGAAATCCATTAACTTTTACTCCAA  
 ACAAAGGCCTTATTCAACCAAAGTTAGTGTTTTGA

>YJL155C 0.75 Cold

ATGGGGTACAGTACTATTTCCAACGATAATGATATCAAAGTATGTGTGATAATGGTTGGCCT  
 ACCAGCTAGAGGAAAGTCTTTTATTTCCCAAAAAATTTATCAGGTAATTCATCGTGGTTATCCA  
 TAAAAGCCAAGTGTTTTAAATGTGGGAAATTACAGAAGAGACGTGAGTGGAAATGTCCCAATG  
 GATGCTGAGTTTTTTAACTTCGAAAATACAGATAATTTTAAACTCAGAGAATTGGCTGCCCA  
 AAATGCCATAAAAGATATTGTTAATTTTTTACTAAAGAAGACGGATCTGTGGCAGTTTTTCG  
 ATGCTACTAATAGTACACGTAAGAAGGAAATGGCTTAAAGATATATGTGAAAAGAATAAT  
 ATTC AACCGATGTTTTTAGAGAGCTGGAGTAACGATCATGAACTGATTATAAATAACGCTAA  
 GGATATCGGTAGCACATCTCTGATTATGAAAACCTGAAACCTCATGTGGCGGAAGCTGATT  
 TTTTGGAAAGAATTAGACAATATGAAAGATTTTATGAACCTTTGGACCCCAAAAAGATAAG  
 GATATGACGTTTCAATTAAGTTGGTCAATATTTATGAAGAAGTAGTAATTAATAAGATCAGAAC  
 ATATTTGGAAAGTAGGATTGTATTTTATGTTATGAATATTCGTCCTAAACCAAATATATCT

GGCTCTCCCGTCACGGCGAATCGATCTATAACGTAGAGAAAAAATTGGCGGGGATTCATCA  
 CTGTCTGAAAGAGGCTTTTTCAGTACGCTAAAAAATTGGAGCAGTTAGTGAAAGAGAGCGCAGG  
 AGAAATAAATTTGACCGTGTGGACTTCCACCTTAAAAAGAACAACAACAAACGGCAAATATC  
 TTCCCTATAAGAACTGCAATGGAAAGCACTTGATGAATTAGACGCTGGCGTTTGTGACGGA  
 ATGACGTATGAGGAAATTGAAAAAGAATATCCTGAAGATTTTAAAGCACGTGATAATGACAA  
 ATACGAGTACAGATATCGTGGTGGAGAATCATAACAGAGATGTAGTGATTTCGTTTAGAGCCCG  
 TCATTATGGAATTGGAGCGCCAAGAAAATGTTCTCATTATAACTCATCAAGCCGTACTTCGG  
 TGTATATATGCATATTTTATGAACGTTCCACAGGAGGAATCCCCTTGGATGTCAATCCCCT  
 ACACACATTGATCAAGCTGGAGCCTAGGGCCTATGGCACAAAGGTCACCAAAATTAAGCAA  
 ACATCCCTGCAGTGAGTACATATAAAGAGAAGGGTACAAGCCAAGTAGGTGAGCTTTCTCAA  
 AGCTCAACTAACTTCATCAACTGCTCAATGACTCTCCTTTGGAAGACAAATTTTAA

>YKL175W 0.77 Cold

ATGGAAAAAATTCCCAGGTGGTGTGTTTTCTCTTATATCGTCGGTGCTGTGCATACTTGG  
 GGCCCTGTGTGTGCCGTTGTTATCGGTTGCCCTTCGATAGCAAGCGCAATAGCCAATCTAAGT  
 TGGTCAACTATGGTCTTTCTCTAAGTGCCGGATCTATGATCACTACTTCACTATACATGCTA  
 TTGCCCTCGGATCGAAAAATCAAACCGGTTCAAGGTTTTTCTGGATTGCTTTTGGGTATTTG  
 CCTCAGTTTTTTCTTAAACTACCTAGTCCACGCTTTTCGCCAGCGAATCGTTGGTACACTGTG  
 CTGATAGCGGTGACCATGCTACAGGTTACATATAACTCCAAATCACATTCGCATTCGCAC  
 TCACACTCACATGCGGATTCGCATTCGAATTTTAGCAACGATCATGATTTAGAAAATGCTCC  
 CTCTGAGCATGGTTATGCAACATCTTCTTCCAGTGTTTCTGAAAATGACCCGTTGATTACAA  
 AGGATAGCGATAGACCCCAAATGAAAAAGAAAATGTCCCTAATTGACTTATTAACCAGAAGG  
 AAATCAGAAGGCGAGTGTGTGACCTAAACAAGTGCACCTCCGCTCTTGCAATCAGAGCAGCC  
 AGAATATATTGCATGTGTCCCACCAGTGATAAAGTCTTCTCAAAGTGAAAAGAAACGTGCCAC  
 ATGGATGCGAGGGATCAGAAGATAATGGACAATCCGATGACAAGGATCATCGTGGCCTTGTA  
 TGCGTGAAAAATAATATCGGTTACGATCTTGAAAACCTATCGTTGTACCGTAAGAATTTTCT  
 TTCGAGCCGCCATCATCATTCCCTCTGAATCGCCGAAAATATGGTTCCAACCAGTTGTGCG  
 ACTCTTTTTTCGTCACCTTTGGGAAATGATGTAACCTGAGAATCCGGCCGCATTGGCAGACACA  
 CAATACCATCCCGAAAATGGTTTATTATACCCACCATCATCACTTAGAGACCCCTTTTTTC  
 CAAATTACTGTCTATTGGTATGCAAACCTTGTCTAGTCTTGCATTACACAAATTTCCCGAAG  
 GGTATTATTATTTTTTACACTAACAGGTGAGATTCGTCAAAGTCTTGGGATTTTCCATTTTT  
 TTAAGTTTTGACGATCCATAATTTTGTGCAAGGATTTGCAATGACGTTACCATTCTACACTGT  
 TTTGCAATCTAAATGGGTTGCCATTTTGGATTACTGCCGTTCTCGGTGGTGGATCTCAACCAT  
 TAGGTGCATTTGATAGGTTATTTTCATCTTTAAAGGTAGTACTCCAAGGGATCACGAACCCAAC  
 ATGGATTTTTTACTGAGCGTTACTGCAGGGTTCCTATTAGTAATTGGTTTACAAATGTTCCA  
 AACTGGTATCGGATTTAGCGATGGACATCATCATCAAGGAGAAGGTGATGAAGAAATGA  
 AACAGTCCCATAGCTCAGGCACAACCTTGCTTGAATGGTGTGCACTGGCGTTTTTGCTAATT  
 CTAGCGAGTGCCCTTTTCACTTGA

>YHL010C 0.81 Cold

ATGGATCAATTTGAGTATATCATTACTTTAGAATTTGGAAACCAAATCAGGTTGAATCCGC  
 TTATCAAATTTTCAAGAGTATTCGAAAAAGTTGAAGGCAAAAAGTATCGGGGAAGAAAAGTA  
 TAAAAGTAATAATCAAGACTGGCAGGATTGGAGAGTCTGTGACTTGGAAATAGACATGATA  
 ACTGATTTCAAAAATCAAACATCAAAGAAGAGGAAAGTGATTTGATTACTTACAAATACTT  
 AGGCCATGGGATAATAAGGCTATTCAGCTAAGCAATGCCAATAATACTCTTAATGAGAAGG  
 AGATTTTGACTATCCCGGGAGATGATACTATGATATGTATCCTGTTTGTCCAACCTATTTT  
 ACCGTTACGATTTATTGCATTTTTATATTGGTGATGATATTGTTAATAAGCAAGTTTCAA  
 CTTTCGTATATTACGAAATCAGCAGAAGGGAATGGGTTTTAATTTACGGTCTTAATTAAT  
 TCAGGAATGCACTTGATGCGAAAAATTTCAAGGAAGAGTCAATGGCAAAAAGTTTACGACAG  
 ATGGATCCCGAAACATGCCATGTGATCTCTGTAAAAGAAATAGTTTTTCAAAAAAAGCTCTT  
 CCAAAGACCAGCCGCTAACGAGGACTTCCCCTATCTGCTTACTGATCCATTCACTGTTAAGA  
 AAAAAAGGAACTGGTAAAAGTCCAACCTCCCACATGTCCCGTTTGCCTTGAAGAATGGAT  
 TCAGAACTACTGGATTAGTAACGATCCCGTGCCAGCACACTTTTCATTGCCAATGCTTAAA  
 TAAGTGAAGAATTCAGGTGTCCAGTGTGTGACATTCAAGTCTGCGGCTAAGCAGGGAAT  
 CATTATTGAAACAGGCAGGTGATTCGCGACATTTGTGCAACATGTGGTTCCTACTGATAATCTA  
 TGGATTTGCTTGATCTGCGGTAATGTTGGATGCGGTGCTTACAATTCCAAACACGCAATCAA  
 GCATTATGAAGAACTTTACATTTGTTTTGCGATGGATATACGGACACAAAGAGTGTGGGATT

ATGCGGGTGATAATTATGTCCATCGCCTAGTTCAAAATGAAGTTGATGGGAAGTTAGTAGAG  
 GTCGGCGGCTCCGGTGACGATGACAACAATGATATAGGCAACTCCGATGAACTACAAAATGT  
 TGTTTACGGGAACAGGAGCAAAAACGGTGAGAAATCGAACTCTAATAAAAAAGATGGCGAGC  
 TGGCGGCAAATTTTTTAAGGCATAGGGAGTATCATCTAGAATATGTGCAAGTCCTAATATCT  
 CAATTAGAGTCTCAAAGAGAATATTATGAACTGAAATTACAAGAAAAAGATCAAACCTGCGTC  
 TGATTCTTCGAATGTTGAAAGTTTGAAGAAGTCTATGGAAGATTTGAAACCTCAATTTGAGG  
 TCACTCAAAGGAGTGGCAGAAAAGGGAAATGGCCAGAAATCTAAGCTTGAGGAAGATATG  
 TTAGTAATCGAAGGACTACAAGCGAACCTAGATCACTTATCAAAAAACAAGAGCAGTTAGA  
 GCGAGAAAACAAAGCGTTAGAAGAGTCTAAACAAGATTTGGAAGAGCAAGTCAAGGACCTAA  
 TGTTTTATCTAGATTCTCAAGAAAAATTCAAAGACGCTGATGAGAGTGTAAGAAGGTTACC  
 ATCCTAATACAGCAACCACATGGGGCAGCACAGGCATCCAAAAGCAAGAAGAAGCGCAACAA  
 AAAATAAAAAAGCAGGGAAATGA

>YPL098C 0.8 Cold

ATGCCTCCTCTTCCACAAAATTATGCGCAACAGCAGCCTTCGAATTGGGACAAATTCAAAAT  
 GGGGTTGATGATGGGTACTACCGTCGGTGTCTGCACAGGCATCCTATTTGGTGGATTTGCCA  
 TCGCAACTCAAGGCCAGGTCTTGATGGTGTAGTTAGAACACTAGGGAAATACATTGCTGGT  
 TCAGCGGGTACCTTTGGGCTATTTATGTCCATCGGGTCTATAATCAGAAGTGATAGTGAAAG  
 TAGTCCAATGTCCCATCCTAACCTGAACCTACAGCAACAGGCAAGACTGGAAATGTGGAAGC  
 TTCGTGCCAAATACGGTATACGTAAGGACTGA

>YKL173W 0.79 Cold

ATGGAAGGTGACGATTTATTCGATGAGTTTGGAAATTTGATCGGAGTTGATCCTTTTGACTC  
 GGATGAAGAAGAAAGTGTGCTGGATGAGCAAGAACAATATCAAACCAATACGTTTGGAGGGGA  
 GCGGCAACAACAATGAGATTGAGAGCAGACAACCTTACCTCGTTAGGAAGTAAAAAGGAACTT  
 GGAATTTTCTTAGAGCACCTTATGGTAAGGAAGTGGAAAGTATTAATGGAAACTAAGAACAC  
 ACAGTCACCACAGACTCCACTGGTAGAGCCGGTTACAGAACGAACAAAGTTGCAAGAGCATA  
 CAATTTTTTACACAATTAAAAAAAAACATTCCGAAGACTAGATATAATCGAGACTATATGTTA  
 TCAATGGCTAACATTCGCGAGAGGATAATAAATGTTGGTGTCAATTGGACCTTCTCACTCAGG  
 TAAGACCTCTTTGATGGATCTCCTAGTAATCGACTCACACAAACGCATACCAGATATGTCTA  
 AGAATGTAGAACTTGATGGAACCGCTAAGATACCTGGATAATTTGAAACAAGAGATTGAC  
 CGGGGTCTTTCCATTAAACTTAATGGTTCCACTCTACTCTGCACCGATTTAGAATCCAAGTC  
 TAGAATGATAAACTTTTTGGATGCACCAGGGCATGTTAATTTTATGGATGAAACGGCAGTCG  
 CACTTGCAGCAAGTGATTTGGTTTTAATCGTGATAGATGTTGTAGAAGGTGTTACATTTGTG  
 GTAGAGCAATTGATAAAACAAAGTATTAATAAATAATGTAGCAATGTGTTTTGTTATAAATAA  
 ACTCGACAGATTGATTCTAGATTTAAAGTTGCCACCAATGGACGCATACTTGAAGTTAAATC  
 ATATAATTGCAAAATATCAATTCCTTTACGAAGGGAAACGTGTTTTTACCAATAGACAATAAC  
 ATAATATTTGCGTCTACAAAGCTGGGCTTCACATTCACTATCAAGGAATTTGTTTTCTTATTA  
 TTACGCCCACTCCATACCTTCTTAAGATAGACGACTTTACCACAAGGCATATGGGGTAGCG  
 TATATTACCATAAAGGTAATTTTCAGGACAAAACCATTTGAAAATGTAGAGAAGTACCCGACT  
 TTCGTTGAATTTATCCTCATCCCGCTTTATAAAAATATTTTCTACGCTTATCTATGGAGAA  
 AGATAAATTAAGAATTTGTTAAGGTCTAACTTTAGAGTTAATTTAAGTCAAGAGGCCCTCC  
 AGTACGATCCGCAACCTTTTTTAAAACACGTTCTACAGTTAATATTTAGGCAACAAACCGGT  
 CTTGTAGATGCGATAACCAGATGTTATCAACCATTTGAATTATTCGACAATAAGACAGCTCA  
 TCTTTCAATTCAGGAAAATCTACACCAGAAGGCACCTTTGGGCTCATGTACTGAAAACCTG  
 TGGATTACGGTGGAGCAGAGTGGTCCCTTGTACGGATATACTCTGGACTTTTGAAGAGAGGG  
 GATACAGTACGTATACTTGATACATCACAATCTGAATCTCGCCAAAAAAGACAGTTGCATGA  
 TATCTCAAAGACGGAAACCTCCAACGAAGATGAAGATGAAGATGACGAAACGCCTTCATGTG  
 AGGTGCAAGAAATGGCTTATTAGGTGGCAGATATGTCTATCCGGTTCATGAAGCACACAAA  
 GGACAGATAGTATTAATAAAAGGTATTTCAAGTGCATATATTAATCCGCGACGTTGTACTC  
 TGTAAGAGTAAGGAGGACATGAAACAGCTAAAATTTTTCAAACCTTTAGATTATATTACC  
 AGGCAGTTTTTCAAATTTGTTCTTCAACCTTTACTGCCAAGGGAATTACCCAAGTTATTGGAT  
 GCCCTGAACAAAAATTTGAAAATACTACCCAGGCGTTATTTAATAAGTTGAGGAATCTGGAGA  
 ACATGTAATACTAGGAAATGGAGAGCTGTATATGGACTGTTTGTGTATGATCTAAGAGCGA  
 GTTATGCAAAGATAGAAATTAATAATATCTGATCCTTTAACTGTTTTTTCTGAAAGTTGCTCA  
 AATGAATCGTTTCGCTTCAATACCTGTAAGTAATTCGATATCTCGCCTTGGTGAGGAAAATTT  
 ACCAGGTCTGTGATTTAGTGTAGCCGCTGAACCAATGGACTCTAAAATGATTCAGGATTTGA

GCAGGAACACATTGGGAAAGGGTCAAAACTGCTTGGATATTGACGGAATAATGGACAACCCA  
 AGGAAACTATCCAAAATATTGAGAACCGAGTATGGGTGGGATTCGTTGGCATCAAGAAACGT  
 TTGGTCTTTTTATAATGGCAACGTGTTGATTAATGACACTTTGCCAGATGAAATCAGTCCTG  
 AATTATTATCCAAATATAAGGAACAAATAATACAAGGATTTTACTGGGCTGTAAAAGAGGGG  
 CCTTGGCAGAAGAACCAATTTATGGTGTACAGTATAAAATGTTATCGATCTCAGTACCTTC  
 CGACGTAAACATTGACGTTATGAAAAGTCAAATTTATCCGCTAATGAAAAAGCCTGTTACG  
 TTGGCTTACTGACAGCAATCCCAATTTTATGGAACCCATCTATGAAGTTGACATCACGGTC  
 CACGCCCTTGGCTGCCAATAGTAGAGGAACTTATGAAGAAGAGACGTGGAAGCAGGATATA  
 CAAAACAATAAAAAGTGGCAGGGACACCATTGTTGGAGGTTTCGTGGACAAGTTCCGGTTATTG  
 AATCTGCAGGATTCGAGACAGATTTGAGATTATCTACGAATGGTCTTGGTATGTGTGAGCTG  
 TACTTTTGGCACAAGATATGGAGGAAGGTTCCGTTGATGTTTTGGATAAAGATGCGTTTAT  
 TCCAAAATTGAAACCCGCACCTATCAACAGTTTAAAGTCGTGATTTTCGTGATGAAAAACAAGAA  
 GCGGAAGGGTATTTCTACAGGTGGATTTATGTCAAATGATGGTCCTACGCTTGAAAAAGTAT  
 ATAAGCGCTGAATTATACGCTCAATTAAGAGAAAATGGCTTAGTACCGTGA

>YNL192W 0.75 Cold

ATGAGTGATCAAAAATAATCGATCGAGAAATGAATATCACTCAAACCGGAAGAATGAACCTTC  
 CTATGAACTCCAAAATGCACATAGCGGGCTATTTCACTCTTCTAATGAAGAATTAACAAACA  
 GGAACCAAAGATATACCAATCAAAATGCCAGCATGGGTTCAATCACTCCAGTCCAATCTTTG  
 CAATTTCCAGAACAATCTCAGCAAACAAATATGCTTTATAACGGTGACGATGGCAATAATAA  
 TACTATCAATGATAACGAACGAGACATATATGGAGGTTTTGTCAACCACCATCGCCAGCGTC  
 CCCCACCAGCAACTGCAGAATACAATGACGTTTTTAATACGAATAGTCAACAGCTACCGTCG  
 GAACATCAATACAATAACGTACCTTCATATCCACTTCCTTCGATAAATGTGATTCAAACCAC  
 TCCAGAACTCATAACATAACGGCTCACAGACTATGGCCACCCCATCGAAAGGCCCTTCTTTA  
 ACGAAAACGACTACTATTATAATAACAGGAACTCTAGGACGTCACCGAGTATTGCTTCTAGT  
 AGCGATGGTTATGCAGATCAGGAAGCTAGGCCATTTTGGAGCAACCCAACAATAACATGAA  
 TAGCGGTAATATTCCTCAATACCATGACCAACCTTTTGGATACAACAATGGTTACCATGGCC  
 TACAGGCAAAAAGATTACTATGACGATCCGGAGGGTGGTTATATTGATCAGAGAGGAGATGAC  
 TATCAGATTAATTCATATTTGGGTAGAAACGGTGAAATGGTTGATCCTTACGATTATGAAA  
 CAGTTTAAACATATGACTCCTATGGAGCGTAGAGAATATCTTCATGATGATAGCAGACCCG  
 TAAACGATGGAAAAGAAGAATTAGACAGTGTGAAAAGCGGTTACTCTCATAGAGACTTGGGG  
 GAATATGACAAGGATGATTTTTCAAGGGATGACGAGTACGATGATCTCAACACTATTGATAA  
 ATTACAGTTTTCAAGCTAATGGTGTACCTGCATCATCTCGGTGTCTTCTATCGGATCTAAAG  
 AATCCGACATAATAGTAAGCAATGATAACTTAACCGCAAATAGAGCACTAAAGAGAAGCGGT  
 ACTGAAATTAGGAAATTCAACTTTGGAATGGTAATTTTGTTTTTCGATTCTCCAATCAGTAA  
 GACGCTATTGGACCAATACGCTACTACAACAGAAAATGCAAACACTTTACCAAATGAGTTTA  
 AGTTTATGAGATATCAAGCAGTTACTTGCGAACCTAATCAACTTGCAGAGAAGAATTTACAG  
 GTGAGGCAGTTGAAGTATTTAAGTCCAAAGGAAACGGAATTGATGCTAGTAGTCACAATGTA  
 TAATGAAGACCATATCCTGTGTAGGAAGAAGTGTGAAAAGGTTATGAGCAATGTCAAATATA  
 TGGTGAATAAAAAAAAAAATTCAGCACTTGGGGGCCGGATGCATGGAAAAGATTGTCGTTTGT  
 ATCATTTTCAGATGGTAGATCCAAAATTAATGAACGCTCGCTAGCATTACTAAGTTTCGTTAGG  
 TTGTTACCAGGACGGGTTTGTAAAGGATGAAATTAATGAAAAAAAAGTGGCAATGCATGTCT  
 ACGAACATACGACAATGATCAACATCACAAATATTTCCGGAATCAGAGGTTTCATTAGAATGC  
 AATCAAGGTACCGTTCCAATACAACTTTTGTTTTGTTTGAAGAGCAAAAATCAGAAAAAAAT  
 TAACTCACATAGATGGGCATTTGAAGGCTTTCGAGAATTAATGCGTCCCAATATCGTTACAT  
 TGTAGATGCTGGTACCATGCCAGGTAAAGATTCATTTACCAGTTATGGAGAGAGTTTCAGG  
 AATCCAAATGTTGGTGGCGCATGTGGTGAATAAAGAACTGATTTGGGTAAGAGATTTGTAAA  
 GCTTTTGAATCCTTTAGTTGCATCACAGAATTTTCGAATACAAAATGTCCAATATTTTAGACA  
 AAACAACCGAGTCTAACTTTGGATTTATTACTGTTCTACCGGGGGCATTCTCTGCGTATAGG  
 TTTGAAGCTGTGAGAGGCCAACCATTACAGAAGTACTTTTATGGTGAATTTATGGAAAATGA  
 AGGTTTTCATTTTTTTTCTTCCAATATGTATCTTGCTGAAGATCGTATTTTATGCTTTGAAG  
 TGGTCACAAAAAAAATTTGTAATTTGGATTTTGAATACTGCAGAAGTTCTTATGCTTCAACA  
 GATGTACCGGAGAGGGTCCCTGAATTTATTTTACAGAGGAGGCGTTGGTTGAATGGTTTCATT  
 TTTTGTAGTGTATATTCCTTTTGTCAATTTTACAGAGTCTGGAGCAGTGGTCATAATTTG  
 GTAGAAAACCTCCTTTTACGGTTGAATTTTTTTTACCTTTTCTTCAATACATTGATTTTCATG  
 TTTTTCATTGAGTTCATTTTTCTTATTCTTTAGAAATCTCACGTTTTCTATGCACTGGCATA  
 CCATTCAGCATTTAATGTGTTGTCCGTCATATTCCTGTGGCTTTATGGGATTTGTACCTTAT

CAACATTCATACTGTCATTGGGTAATAAACCTAAAAGTACTGAGAAATTTTATGTTCTAACT  
 TGGTCATTTTTGCGGTGATGATGATTTACATGATATTCTGCAGTATATTCATGAGTGTCAA  
 ATCCTTCCAAAATATATTGAAAAACGATACCATCAGCTTTGAGGGTTTGATTACCACAGAAG  
 CTTTCAGGGATATTGTTATCTCTCTGGGCTCCACTTATTGTTTGTACCTAATCAGTTCAATT  
 ATCTATTTGCAGCCATGGCATATGTTGACAAGTTTTTATTTCAGTATATTTTATTGAGTCC TTC  
 TTACATCAATGTTTTGAATATCTATGCATTTTGTAATGTCCACGACTTATCATGGGGTACAA  
 AGGGTGCAATGGCAAATCCGCTGGGTAAGATTAATACTACAGAAGATGGTACGTTCAAAATG  
 GAAGTCTGGTCTCTAGTTCAGAGATTCAAGCAAACCTACGATAAATATTTGAAAGTTTTAAA  
 TGACTTCGATCCAAAATCAGAACTCTCGGCCACTGAGCCATCTTATGATGAAAAAAGACTG  
 GCTATTATGCAAACGTTAGATCTCTCGTGATTATCTTTTGGGTGCATCACAATTTTCATC  
 GTTGCTGTTGCTTAGAAACCGGTGGGATTGCAGATTATATGCTATGAAATCCATATCAAC  
 TGATGACACTTTAGAACTGCAAAGAAGCGGAAATTCCTTAATGACCAGTAAGGCCTCAA  
 TTTATTTTAAATGTAATTTTATGGTTAGTTGCATTATCGGCATTAATAAGGTTTCATTGGTGC  
 TCAATATACATGATAGTAAGGTTTTTTAAAAAGGTTACATTTTCGCTAA

>YLR133W 0.68 Cold

ATGGTACAAGAATCACGTCCAGGGAGTGTAAGAAGTTACTCGGTTCGGTTACCAAGCAAGGTC  
 CAGATCGAGTTCTCAAAGAAGACATTCGTTAACACGCCAACGTTCCCTCGCAAAGACTGATTA  
 GAACCATCAGTATCGAGTCTGATGTGTCTAATATTACTGACGATGACGATTTGAGAGCTGTC  
 AATGAGGGAGTAGCGGGTGTGCAACTGGACGTCTCTGAAACCGCAAATAAGGGACCAAGAAG  
 AGCATCAGCAACTGATGTACAGATAGTTTGGGTTTCGACTTCGTCGGAATATATTGAGATTC  
 CCTTTGTTAAGGAAACATTGGATGCAAGTTTACCTTCGGATTATCTGAAGCAGGACATATTA  
 AATCTCATTACAGAGTTTTGAAGATATCCAAATGGTATAACAACAAGAAAAATCCAACCGGTAGC  
 ACAAGATATGAACTTAGTCAAGATCTCTGGTGCGATGACAAACGCAATTTTCAAAGTTGAAT  
 ACCCTAAGTTACCATCGTTGCTATTGAGAATATACGGACCGAATATTGATAATATCATTGAC  
 AGGGAATATGAATTGCAGATTTTGGCTAGGCTTTTCATTGAAAAATATAGTCCCTTCCCTTTA  
 CGGCTGTTTTGTAAACGGTAGATTTGAGCAGTTTCTGGAGAATTCTAAGACTTTAACAAG  
 ACGACATTAGAAACTGGAAGAACCTCTCAAAGGATTGCAAGGAGAATGAAGGAGTTACATGTA  
 GGTGTTCCCTCTCTTGAGTTCAGAAAGGAAGAACGGGTCGGCTTGTTGGCAAAGATTAACCA  
 GTGGTTGCGCACGATTGAGAAAGTCGACCAATGGGTGGGGGATCCTAAAAACATTGAAAAC  
 CTTTATTATGTGAGAATTGGTCCAAGTTTATGGATATTGTCGATAGATATCACAAGTGGCTT  
 ATTTCTCAAGAACAGGGTATAGAGCAAGTCAACAAAAATCTTATATTCTGCCATAATGATGC  
 CCAATACGGCAATTTACTTTTCACTGCTCCTGTGATGAACACACCGAGCCTATACACTGCAC  
 CTTCTGCTACATCATTGACTTCCCAATCAAGTTCCCTTATTTCCCTTCGAGCTCCAATGTCATT  
 GTAGATGATATAATCAACCCGCCAAAGCAGGAGCAAAGCCAAGATTCCAAATTTGGTTCGTCAT  
 TGATTTTGAATATGCAGGTGCCAATCCCGCCGATATGATTTAGCGAATCATCTTTCCGAGT  
 GGATGTATGATTACAACAATGCTAAGGCCCCACATCAGTGCCACGCTGATAGATATCCCGAT  
 AAAGAACAGGTTTTGAATTTCTTATACTCTTATGTTTTCGCATCTAAGGGGTGGTGCTAAGGA  
 ACCCATAGATGAAGAGGTTCAAAGACTCTATAAGTCAATCATTCAATGGAGACCCACTGTAC  
 AACTATTTTGGTCTCTGGGCCATCCTACAAAGTGGTAAATTAGAGAAAAAAGAAGCCTCC  
 ACTGCCATCAGTAGAGAAGAAATGGACCCAATGGAAAAAATATATCATCAAGACTGAACC  
 CGAATCCCCTGAAGAAGACTTTGTTGAAAATGACGACGAGCCTGAAGCTGGCGTCAGCATTG  
 ACACGTTTCGATTATATGGCTTATGGTCGTGACAAGATTGCGGTCTTTTGGGGCGACCTCATT  
 GGCTTAGGCATAATCACCGAAGAAGAATGCAAAAATTTTCAGCTCTTTCAAGTTCCCTCGATAC  
 TAGTTATTTGTAA

>YDR330W 0.82 Cold

ATGTCAGAGGGAAAAGTAGACGAATTTATGGCCATCACTGGCGCTGATGACGCTGCTATTGC  
 CACTCAATTCATCGAAATGGCAGACGGGAAC TTGAACACAGCCATATCATTTTTCGAAA  
 ATGGTGGGGCTGCTTTACTGAGCAGTAACAACACACCTACTCCGTCTAATTCGACTCCTATG  
 GCGCCACCTCTGTAGATTTCAGATGCCGATGCACAATTAGCGGAGAGGTTGCAAAGGGAAGC  
 TTACCAACAACAACAGCCTGACCAAGATTATGTCAGGCCACCTGATGAGGCAAGACATGAAG  
 TACTTACTGAAACTTCAGGATTTCCCAATTTCTTACGGCGGCATTGGCGGAAGATTTGAACCA  
 TTGCATAGGGTGAACGACATGTTTACGAAGGAAGACCTGAAAGCATTTTTAAATCAACGATT  
 GGATGACACAAATACTAATACATACATCAATGACAACCTTCAGATTCCCTGGACTCCGAGG  
 AAGAAAATGACGACGACGAATATGAGTATGTGGAAGAGCCGGTTCATCGAACTTGATGAAGAC  
 GGCAATATCAAGGAGTACACCAAATTAGTGAGAAAGCCTAAAACCATTTCCAAGGAGCAGAA

ATTAGCTTTGTTATTTAGGCCTCCATTTTCAATCATGTCCAAACTCGACTTAGACGCTGCAA  
 AGCAAAGGCAAGGGCAAAGCAAAAATGGATAATGATTAACATTCAGGATTCAGGAATCTTC  
 CAATGCCAAGCCCTCAACAGGGATTTGTGGTCGTCCAGACCGGTAAAAACTATAATCAAAGA  
 GAACTTCGTTTTCTACAGTATCAATATGAATCACGTAATGCCCAACCCTATCTTCAGTTCT  
 ATCACTTGAATAATAAGGATGATTTGCCCATATCGCGATACTGGATCCAATTACCGGTGAA  
 CGTGTCAAGCAATGGAATAGGGTTGTTCCCATTCAGAGCAATTCATCTCAGAAATCAACGA  
 GTTTTTGGCCTCATTTTCGCTAGATCCAAAGGTCCTAATCCCACGGTTAATGAACCTCTTC  
 CTAAGTGGATCCAACAACCTTGACCGAAGAGCAACAAATGGAATTAGCCATTAAGAGTCA  
 TTAATAATAACTCGAGCAAAATCAAACCAAGAAGAAGTGCCGAGTACTGGCGAAGAACAGAA  
 ACGAGTACAAGAACCGGATCCATTCAGTACCATTGAAGCCAGGGTGCATCCAGAACCGCCAA  
 ATAAACCAGGGATCACTACAAGAATTCAAATTCGTACCGGTGATGGCTCCAGACTAGTTCGT  
 AGATTCAATGCTCTGGAAGACACTGTGCGTACTATTTACGAGGTTATCAAGACAGAAATGGA  
 TGGTTTTGCCGATTCAAGATTCACACTAAATGATCACCAAAAGAGAGGACTTGATTGATAAAT  
 TAAACATGACCATAGCGGACGCCGGCTTAAAAAATAGTTCTTTACTACTTGAGAAGCTTGAC  
 CCTGAAATAGAATAA

>YKL168C 0.76 Cold

ATGGTAATGCAGGAGGAGAAGAAGCGGCAACAACCTGTGACAAGAAGAGTAAGGTCATTTTC  
 TGAGTCCTTTAAAAACCTTTTCAGGCCGCTCGTTCAAGAGATTCAAGTCCTATTAATGTCA  
 CCCGAATTCCTTATCGATCGTCTTCTACCTCACCCAAGAGAAGCTCTGAGCCACCAAGACGA  
 TCAACCGTATCCGCACAAATTTTAGATCCAAAAAATTTCTCCAATACGCCAGCGTAGTTATAC  
 ATTGAAGTGTTGCACCCCGGGCCTGTCACATCCATTTAGACAGACAGGAAGTGGTGCTAGTA  
 ATAGTCCTACCAGACATCGCTCTATATCTGGGGAAGAACAGGAAATTGTTAACAGTTTACCA  
 GAATACAAAAGATCTGCTTCTCATACTTTTCATGGCATAACGGCGTCCACGTTCAAGAAGTTC  
 ATCTGTTTTCGTCATGTGACAGTTCAAATGGAACGACAAGTTCATCAGACAGTCAATGGGCTA  
 TGGATTCTTTACTAGATGATTCAGACAATGACCTCACACCTTATCGTGGCTCGAACAAAAGAT  
 ATACTGAAAAGTAAAGACCGGGCGCCGTATAATTACATAGATGACTACAATAAGAAGGCTTT  
 ACGCAGAGCAACATCATATCCAAATCCTCTCCCCTCCAAGCAATTCTATAATGAAAGGTTAT  
 ACACCAGGAGGTCACATCCAGATGAAGAAAAGTTTGAGAGCTTGCCTCGATTTGCAGGAGCA  
 GATGTGCAATGTATAATTGAGCAAAATGGCTTCAAAGTTTACGAAGACGGAAGTCATGAACA  
 TAATATAAAGTTATCAGGGGTAATTGCGAAATTAGAGAAAGGTAACCTCTTACCGGCACATC  
 GACAGGGATCATTATCTAGACCAAGATTAGGTATTACTCTTTCTGGTCTATTCAAACATCAT  
 AAAAATGAATGCGATATTGAAAACGCTTTATCTCTTCTGCCAAACGTAGAAAAATCTCAGAC  
 AAACCATGAGAAAAGAACCAGGTCAAAGTCCTAACGATAGCAACCGCAGCTCGCCCACGCAAG  
 GAAGGGAAGATTATCTAAAAATAGTGAATCCCGACGCATCATTGGGCAGTGATGAGTTGAAG  
 TTGATTAATTCATTATCAAGCAGAATTCATAAAAAGTTTACAAAATTATTTGCAAGAAAAAAA  
 TCTAAAACCGGCTGAGTGTATCGGCGAGCAAGCACCTACTTTTCAAGATAATTATGGCCATC  
 CTGTTGGTCTCGTTGGCGCTGGAGCTTACGGTGAAGTTAAGCTGTGTGCCAGACTACGGAAT  
 GAAAAGGACTCCCCCATTGAAACATATCATGATAGCAAATACATATACTATGCTGTGAA  
 AGAATTGAAACCCAAACCAGACAGTGAATTTAGAGAAGTTCGTACAAAGATCACCTCTGAGT  
 TTATTATTGGGCATTCCTTGAGCCACTACCACAAAATGGTAAAAAACAGCCCCCAATATT  
 CTAACGTATTTGATATTCTAGAAGACAGTCTTTCGTTTATTGAAGTAATGGAATTTTGCCC  
 TGCTGGTGACCTTTATGGTATGCTGGTCGGTAAGTCGAAATTAAGGGCCGATTACATCCGT  
 TAGAAGCCGATTGTTTCATGAAGCAACTGCTTCATGGTGTAAAGTTCATGCATGATCATGGT  
 ATCGTTCATTGTGATTTAAAACCTGAAAATATTCTCTTTTATCCGCATGGTCTATTGAAAAT  
 ATGTGACTTCGGTACAAGTTCTGTATTTCAAACCGCTTGGGAAAGGAGGGTTCATGCTCAA  
 AGGGTATAATTGGATCAGAGCCTTACGTAGCTCCAGAAGAGTTTGTGATGGGGAGTATTAC  
 GATCCAAGACTGATTGACTGTTGGAGTTGTGGCCTTGTATATAACAATGATATTGGGGCA  
 TTATCTTTGGAAAGTAGCTTCGAGAGAAAAAGATATGTCTTATGATGAATTTTACAAGGAAA  
 TGCAGCGTAAAAACAGTTTAGGGTATTCGAAGAATTAAGCACGTAACCTCAGAGTTGGCC  
 ACAAATAGAAAAATCGCATTATATCGCATCTTCAATGGGAACCAAGAAAAAGGATTTCTGT  
 TGGCAAACCTTTTAGATATGCAGTGGATGAAAAGTACGAATTGCTGCCTAATATATGATTCAC  
 CATAA

>YLR004C 0.79 Cold

ATGAAAAACATGTCACAACGATCCATGGACGTGGAGAAGAAGGCAGCTAACGCTGATAGTTG  
 TTCCGTAAGTACCTCGAGCATTAATGTAGACGATGCGGACGTTGCTTTAAGATTCTTGAAC



AGAACGGTCTCGACGAAAGCTCCACGGCTAATGAAGACGATGTTGTAGCAGGCCGAAGAAGCC  
 AACTTCTATGGTCCCATGAATTATCTCCTAAGGCTCTGAGAAAAGTTGACCTCTTCATCCT  
 GCCTTTTTATGCTGTACATATCTTCTGATGTTTTTGGATAAGGCTCTGCTGAACCTACGCTG  
 CATCTATGGGTATCAAAGATCATTTGAAAGGTAACGAATTTTCTAATTTGGGTACTATCTTT  
 TCTGCTGCTTACATTTTTCATGGAACCTGTGGTCACTTACTTAATTCAAAAATTCCCCATTTT  
 CAAAATCCTAGGTACTTTTTATTACCGTCTGGGGTATCGTGTGGCTTGCCATGCTGCTTGTA  
 AGACGTACGCCTCGTTGATGGTCGTTCTGACTCTCCTAGGTCTCTTTGAATCCTCGAGTGCA  
 GTTGGTTGTATCGCTATTAGTGGTATGTACTATACTAAATCTGAACAGAGTGCAAGAATTGG  
 ATCTGGGCCACACAGGCTGGTACAGGTTATATTGTGGGCGGGTTAATTTCTTTTGGCTTTT  
 TACATTATCATGGTACCGCTTTCACCTCTTGGCAAATAATGTTTTTGGTCGTTGGTCTGGTT  
 ACAGTTGCGTTTTGGTGTCTAACATTCTTATACCTTCCAGATAACGTCACCAATGCTTGGTT  
 CCTAAACAAAGAGGAAAAAATTCAGTTGTTGAGCATATCAGAGCTAACCAAATGGCCTGG  
 AAACAAGAAGTTTAAAGAAGCAGCAAGTTAAAGAATATTCCTTCATGATAAGTTTACTTGG  
 CCGATGCTTTTATTAAGTGCATGTTCTCAAAATTTCTACTGGTGCCATTGGTACATTTTTCAGT  
 GACCATCACTGGTACTTTTTGGTTTCGACAAGTACGAAACAGCATTACTGCAGTTGCCATTTG  
 GTGCCATTACGGCTATGATTATTCTTATAACAACCTCAAAATGTTGTCCCCTGGGGTCATATC  
 ACCTCATAACCACATCTATGTATATTCCAGCTATTATAGGTTGTATCGTTCTTATCAGTTT  
 ACCCTTATCCATAAGATCGGTAACCTTATTTTCTCTGACTTGCTTTACAGTGGTTCCCTGTG  
 TCATTACCAATATTTACATCTGGAATTCATGCAACACCTCCGGTTACACCAAAGAGTTTTT  
 AGAAATGCTATTACAATGATTGTATAACAATGTCTCCTGTATTATTGCTCCACAGATGTTTAG  
 GGCATACTCTGCTCCACGTTACATAACCAGCAAAGATTGCCCTTATTGGTCACTCAGTGTGTTT  
 GTGTTCCCCTACAATTATACATTGGCTACATTTGCAAGAAGGAGAACGAAAAGCGTGATAAG  
 GAACAAGAAGGTCAAGAAAGGAAGAAGTACCAATTTTTTGGACTTGACTGATATCGAAAACAG  
 AAATTTACAGGTACATTTACTAA

>YKR009C 0.79 Cold

ATGCCTGGAAATTTATCCTTCAAAGATAGAGTGTGTTGTAATCACGGGCGCTGGAGGGGGCTT  
 AGGTAAGGTGTATGCACTAGCTTACGCAAGCAGAGGTGCAAAAGTGGTCGTCATGATCTAG  
 GTGGCACTTTGGGTGGTTTACAGGACATAACTCCAAAGCTGCAGACTTAGTGGTGGATGAGATA  
 AAAAAAGCCGGAGGTATAGCTGTGGCAAATTACGACTCTGTTAATGAAAAATGGAGAGAAAAT  
 AATTGAAACCGCTATAAAAGAATTCGGCAGGGTTGATGTACTAATTAACAACGCTGGAATAT  
 TAAGGGATGTTTCATTTGCAAAGATGACAGAACGTGAGTTTGCATCTGTGGTAGATGTTTCAT  
 TTGACAGGTGGCTATAAGCTATCGCGTGCTGCTTGGCCTTATATGCGCTCTCAGAAATTTGG  
 TAGAATCATTAACACCGCTTCCCCTGCCGGTCTATTTGGAAATTTTGGTCAAGCTAATTATT  
 CAGCAGCTAAAATGGGCTTAGTGGTTTTGGCGGAAACCCCTCGCGAAGGAGGGTGCCAAATAC  
 AACATTAATGTTAATTCAATTGCGCCATTGGCTAGATCACGTATGACAGAAAACGTGTTACC  
 ACCACATATCTTGAACAGTTAGGACCGGAAAAAATTTGTTCCCTTAGTACTCTATTTGACAC  
 ACGAAAGTACGAAAGTGTCAAACCTCATTTTTTGAACTCGCTGCTGGATTCTTTGGACAGCTC  
 AGATGGGAGAGGTCTTCTGGACAAATTTTCAATCCAGACCCCAAGACATATACTCCTGAAGC  
 AATTTTAAATAAGTGGAAAGGAAATCACAGACTATAGGGACAAGCCATTTAACAACAACTCAGC  
 ATCCATATCAACTCTCGGATTATAATGATTTAATCACCAAAGCAAAAAAATACCTCCCAAT  
 GAACAAGGCTCAGTGAATAAAGTCAAGTGCCTTTGCAACAAAGTCGTAGTAGTTACGGGTGCAGG  
 AGGTGGTCTTGGGAAGTCTCATGCAATCTGGTTTGCACGGTACGGTGCGAAGGTAGTTGTAA  
 ATGACATCAAGGATCCTTTTTTCAGTTGTTGAAGAAATAAATAAACTATATGGTGAAGGCACA  
 GCCATTCAGATCCCATGATGTGGTCACCGAAGCTCCTCTCATTATCCAAACTGCAATAAG  
 TAAGTTTCAGAGAGTAGACATCTTGGTCAATAACGCTGGTATTTTGGTGACAAATCTTTTT  
 TAAAAATGAAAGATGAGGAATGGTTTGTCTGCTGAAAGTCCACCTTTTTTCCACATTTTCA  
 TTGTCAAAGCAGTATGGCCAATATTTACCAAACAAAAGTCTGGATTTATTAACAATACTAC  
 TTCTACCTCAGGAATTTATGGTAATTTTGGACAGGCCAATTATGCCGCTGCAAAAGCCGCCA  
 TTTTAGGATTCAGTAAACTATTGCACTGGAAGGTGCAAGAGAGGAATTATTGTTAATGTT  
 ATCGTCTCTCATGCAGAAACGGCTATGACAAAGACTATATTCTCGGAGAAGGAATTATCAAA  
 CCATTTGATGCATCTCAAGTCTCCCCACTTGTGTTTTGTTGGCATCTGAAGAACTACAAA  
 AGTATTTCTGGAAGAAGGGTTATTGGCCAATATTTCGAAGTTGGCGGTGGTTGGTGTGGGCAA  
 ACCAGATGGCAAAGAAGTTCCGGTTATGTTTCTATTAAAGAGACTATTGAACCGGAAGAAAT  
 TAAAGAAAATTTGGAACCACATCACTGATTTTCAGTCGCAACACTATCAACCCGAGCTCCACAG  
 AGGAGTCTTCTATGGCAACCTTGCAAGCCGTGCAAAAAGCGCACTCTTCAAAGGAGTTGGAT  
 GATGGATTATTCAAGTACACTACCAAGGATGTATCTTGTACAATTTAGGACTTGATGCAC

AAGCAAAGAGCTTAAGTACACCTACGAGAATGATCCAGACTTCCAAGTTTTGCCACGTTCCG  
 CCGTCATTCCATTTATGCAAGCTACTGCCACACTAGCTATGGACAATTTAGTCGATAACTTC  
 AATTATGCAATGTTACTGCATGGAGAACAATATTTTAAGCTCTGCACGCCGACAATGCCAAG  
 TAATGGAACCTCTAAAGACACTTGCTAAACCTTTACAAGTACTTGACAAGAATGGTAAAGCCG  
 CTTTAGTTGTTGGTGGCTTCGAAACTTATGACATTAATAAATAAGAACTCATAGCTTATAAC  
 GAAGGATCGTTCTTCATCAGGGGCGCACATGTACCTCCAGAAAAGGAAGTGAGGGATGGGAA  
 AAGAGCCAAGTTTGTGTCCAAAATTTTGAAGTGCCACATGGAAAGGTACCAGATTTTGGAGG  
 CGGAGATTTCTACGAATAAAGATCAAGCCGCATTGTACAGGTTATCTGGCGATTTCAATCCT  
 TTACATATCGATCCCACGCTAGCCAAAGCAGTTAAATTTCTACGCCAATTTCTGCATGGGCT  
 TTGTACATTAGGTATTAGTGCGAAAGCATTGTTTGAACATTATGGTCCATATGAGGAGTTGA  
 AAGTGAGATTTACCAATGTTGTTTTCCAGGTGATACTCTAAAGGTTAAAGCTTGGAAAGCAA  
 GGCTCGGTTGTCGTTTTTCAAACAATTGATACGACCAGAAACGTCATTGTATTGGATAACGC  
 CGCTGTAAACTATCGCAGGCCAAAATCTAAACTATAA

>YER006W 0.79 Cold

ATGAGAGTCAGAAAGCGCCAATCTAGAAGAACATCTACCAAGTTGAAGGAAGGTATTAAGAA  
 GAAGGCTTCTGCCCATAGAAAAAAGGAAAAAGAAGATGGCTAAGAAGGACGTTACTTGGAGAT  
 CAAGGTCTAAGAAAGACCCTGGTATTCTCTTAACCTTTCTTATAAGGCTAAGATCTTAGAA  
 GAAATAGAAGCCAAAAAATGAAGGACTTAGAGGAAAGAGAGCTTGCCAAACAACAACGATT  
 GGAGGCTAGGAAAGCTGCCAAGGAACAAGGCGTTGATGCAATGGATGAAGACATGATAGAAG  
 ACGATGAAAATGGATTAGCAGCTTTGGTTGAGTCTGCTCAGCAAGCAGCTGCTGAATATGAG  
 GGCACACCCTCTAATGATGCAGATGTTTCGTGATGATGAATTGGACGTCATTGATTATAACAT  
 TGATTTCTACGGTGAAGATGTAGAAGGCGAGTCAGAACTTGAAAAATCTAGGAAAGCTTATG  
 ACAAGATTTTCAAATCCGTTATTGATGCTTCTGATGTCATCCTATATGTTTTGGATGCCAGA  
 GATCCAGAGAGTACAAGATCAAGAAAGGTGGAAGAAGCCGCTTTACAAAGTCAGGGTAAAAG  
 GCTGATTTTAATACTGAACAAAAGTTGATTTAATTCCCCCACATGTATTGGAACAATGGTTAA  
 ATTACTTAAAGTCTAGTTTTCTTACAATCCCATTAAGAGCTTCTTCTGGTGCAGTCAACGGA  
 ACTTCTTTCAACAGAAAGCTAAGCCAAACCCTACTGCAAGTGCCTGCTAGAGTCGCTGAA  
 AACTTACTCTAATAACAGCAATTTGAAGAGATCTATTGTAGTGGGTGTTATCGGTTATCCAA  
 ATGTTGGTAAATCATCTGTTATCAACGCTCTTTTGGCGCGCCGTGGAGGTCAATCAAAGGCT  
 TGCCAGTCGGTAATGAAGCAGGTGTTACTACCTCTCTGAGAGAGATCAAAAATCGACAACAA  
 GTTGAAGATTCTAGATTCTCCTGGTATATGTTTCCCAAGCGAAAATAAGAAAAGATCGAAAG  
 TTGAACATGAAGCTGAATTAGCTCTTCTAAATGCTCTACCGGCAAAACACATTGTTGATCCG  
 TATCCAGCTGTCTTAATGTTGGTAAAGAGACTAGCTAAATCAGATGAAATGACAGAGAGCTT  
 TAAAAAGCTGTATGAAATTCCTCCTATTCTCTGCTAATGATGCAGATACGTTTACAAAACATT  
 TCTTAATTCACGTCGCTCGTAAAAGAGGTAGATTAGGGAAAGGCGGTATTCCAAATCTTGCC  
 AGTGCTGGTCTTTCGGTACTTAATGACTGGAGGGATGGTAAAATTCTTGGTTGGGTTTTACC  
 AAATACATCGGCAGCTGCATCTCAACAAGATAAACAAAATCTAAGTACTATAAACACTGGCA  
 CTAACAAGCTCCAATTGCAGCAAATGAATCCACCATTGTATCCGAGTGGTCCAAAGAATTT  
 GATTTGGATGGATTATTTAGCTCTCTTGACAAGGCCATAGATGCTAGCAAAGATCAAGATAC  
 AATGATGGAATAA

>YIR003W 0.8 Cold

ATGCCATCGGAAGTTACGCCAAAAGTACCTGAGAGGCCCTCAAGGAGGAAGACATCTGAGCT  
 GTTTCGGTTATCCGGCTCTGAATCAGGAGATATTAAGCTAATAGCGAGCCACCAACACCAG  
 CAGGAACGCCCAATGTACCAACACGTAGACCATACTTAAAGCAAAGACGATGACTTCGTTT  
 GAGAGTGGTATGGATCAAGAGAGTTTGCCCAAGGTACCATTGCAGAGGCCAGTTAGACGCTC  
 CACTACTGAAGAATAAATAATGTAATGAATAACACCAGTAAGGAGTTAGAGGAGATTGAAA  
 GTTTGATTTCAAAGCACAAATATACACAATGTTTCCAGGAAAAAAAGTCCAACCTTCTGTGGAA  
 GAGGGAAAGGTGGCCGCCATTCATCAAAACGGGCAAAGAAGTGCATCAGATAACAAAACCTC  
 TACAAATCCCTCCCCTCGAAAAAATGAGCACGAGGGTGCTGAGGGCAATGAGTCTGCTA  
 TTTACCTTCTAATTTAGTTAAACAAGTCTAATAATGAAGTGACAGAGCATAGTGACTCCGAA  
 GACCTTACTGAAAAGCAAAGGTACATGCTGCCCTAGATAATGAGGCAGGGGATAGAAGCCA  
 TTTTGAAGAAAAGCTCATTCTGGAGATATGAAAGTACAGGTAGATGTTAGTAAGGACGTAG  
 AAGAAGGCAGCTCAATGCTCTGCCTCCATCTGGAATCACAGAATCAGACGACAAAGCTGAA  
 AAGTTCACTAAACATCCTGAATCTAGTTTGAAGAGCTACAGAAGCATCAAGAACAACAGGA  
 AGAAAAAATTTTCCAAAATCCAACCGATGAAGAAAGTACTACCTCTTTGAATGAGAAAACAAG

AAGGCAAGGACAACATGGAAGTGAATTCTCAGCCGCAAGGACCTTCTGATACTGAAACAGTT  
 ATAGCAGCAACTAGCTCAAACGTTCCCTTCACAAATTGCAAGTGAAGAGGAAAATGACGTTCC  
 AGTGATTCCAAGGAGTAGGCCTAAGAAGGATTTTGAAGCACACGTACAAAAAGAGGAGTTGC  
 CTAACACACAAGAGAAGCGAGTATCAGAAGAGTGTGATTCGACCCTAATTAGTACCGAAGAG  
 GAAAGTAAAATCCCAAAAATTCCTCTGAAAGACCAAAGAGACGTGCCCCACCTCCGGTTCC  
 CAAAAACCTTCTTCAAGAATTGCGGCCTTTCAGAAAATGTTACAAAAACAACAGCAACAAG  
 ATCTGCATAATAATGGTAATTCTTCAGCTACTACCGCTTCAGCAGATATGCTAAAAAACAC  
 ACAGATTCTTCTATTACTAGCGATACCACGAAGGCAGATTTTACGAGCAAATGAATGGACT  
 GTTTCGCTACCTGGTATGGTGAACCCTGGACAGCTTCCACCTTCCCTTGGAGAAGAAGTTGT  
 CCTCCCGGATACTGAATCTAAGCTAGGACCCAGGACCAATCACAGGCAAAAACGGGACCT  
 CTGGGCGGAAGTAGAAGAGGTAGAGGACCTCGTGGGCGTAAATTACCTTCTAAAGTAGCTAG  
 CGTAGAGAAGATTGAAGAAGATGACAACACTAATAAAAATAGAAATATTTAACAATTGGAATG  
 TTTCTTCTTCTTCTAAGGAAAAAGTCTTAATAGATACTACTCCTGGTGAGCAAGCAGAA  
 AGGGCCTTGGATGAAAAGTCAAAGAGCATTCCCAGGAAACAACGAGAACAATCTCCAAATAA  
 GATGGAGGCTGCTCTTTGTCTTTTGAGCTGGACGAAAAGGAAAAGTTACCTGCTAATGCTG  
 AGTCGGATCCTCTTCTCAGTTGCCACAGACGAACGCCGTAGGTAATAGAAAAGCCATAAGT  
 GAGGAATCTCTGTCCCATCGGAGGCCATCGCCAACAGAGATCAAACGATACGACAGAAAT  
 ACAGGAACAGCAGATGGAGGACCAATGGAGGTTGATATGGAAAGAGAACTCTCAGGTGGCT  
 ACGAAGACGTTGATTCTGCCTTACATTACAGAAGAAGCGTCTTTTCACTCCCTTTAG

>YKL033W 0.79 Cold

ATGAATTCAGACACGAATGCATTTAAGGACATAAGAATTTTCATGTGTTGAACTTTCTAGGAT  
 CGCTTTTTTACCACCGAATCATTTGATCCAAATTCATTAACGCTATTGGCATGTTTAAAAA  
 AAGTTGAAGAGAAGTTATCAGCATAACGAAGACGATTCACTTTCGCCAAAAATTTGCAGATTAT  
 GTTTTTGTTTCTATCGCGAGTTTATTGAAAACAGCCAGCTCTCGGCGAGTCTCAAACAGAATA  
 CGTCCCTACTAATTATATTTTATCTCTTACGGACATGTTGGTTCATCTAATGGTAAATTTCTCCG  
 AGCAATTGGGACAACAACCTGTTCCCTTAATCACATTTTTTAGTCAGTTCTGATAAAGATAAT  
 CAAAAATTAATTACTAGATCAGACGAGTTCAAGTACGCTGGTTGTTTAGTCTTGCATCAGTT  
 TTTCAAATCAGTAAGATCGCAAAGGTACCATAAAGAGTTCTTTTCGAACTCAAACCTAATT  
 TACTTCCCCTCTAGGACATTTCTGTTACCATTCTGTTGAAAATTTCTGGAGCAATCGCCCCAA  
 AATAATGAGCTTCAATTCAAAGCTTTGGCATCCTTAGAAGTACTATTTTCAGGACATAATATC  
 TGATGGTGAATGCTTTTCTTTATTCTTCCGGGGAACGTTTCTGTTTTCGCTAAGATACTTA  
 CTAACCAGGCCGTCAAATACATTATAAGGTGTGTGTTTCGCACGCTAGAGGTTCTGGCAAAA  
 TTATTGGTTTTGGTTTACGATGATTTTAGTTTGGATATCAAAGTAAATAAGTTAACAGATAT  
 TCGAGAGTTGAGCGATACAAAGTTAAAACACGAGATAAATCAATCATTTATGTTTAAATGGAC  
 CTATTGTTTTGTTACGCACAGATGGGAAGACGCATAGAGATAAAGTTGTTGACGGCAACT  
 TCTGGGCAAAATCAATATTGCTTTGGAGGCCCTTTATACCCAAACATTTAAAACGTAATAATGA  
 ATCAATTGATGAGGCATTAGCGACATTTGTATCAATCCTTTTAACTAGATGTGAAAATTTCTT  
 TAAATAATTGTGAGAAAGTGTGGTATCCACTTTAGTACATTTGGAGCGTGATCCGATGTCC  
 AAATTACCATCGCATTTGGTAAAATTAAGGAAGTTGTCAATGAAGACCTGCACAAGCTAAG  
 TGACATTATTTCGTTTTGAAAATGCAGATAGGTTATCATCTTTATCATTGCAATCACTATTC  
 TAGAGAAAAATAACGAAAGAGATACAATGATCAATGAGGTAGTTAGATGTTTATTTGAATCG  
 CTTAATGAATCTATTGAGCCACCAAGTTTATCAATCATAAAGAGAGAATAATTGAACAAAG  
 TAGTCAATTAACAACACTACAGTAAATTTGAAAACCTTGGAAAAGTACGAATGCTCTGATTGCTT  
 TACCAAGATTATCAGAAGACATGTCACCTCAAACGAAAAATTTACATAACCATATGGGTTCT  
 TTGTTGTTAGAAAAGACATATTCTCAACGATGTGGTGACAGAGTTGATTTCAGAACAAGTTGA  
 TTCACCAAGAACGCAGAAGATAGTTGCGCTGTGGTTAAGCACCAATTTTATAAAGGCTATGG  
 AAAAGCAACCGAAGGAGGAAGAAGTCTATCTACAATTTGAATCTGATGCCAACTATTCCTCT  
 TCCATGGTTGAAGAAGTGTGTTGATTGTATTGGAATTTTGCAATGAACTTTCTCAAGACAT  
 TAGCATGGAGATTGAAGGTAAAGGCATAAAAAAAGTATGAGTTTGCCGTATGTACAGTTT  
 TATCTCTATTGAAACGATTTGTGCGGTAATGAGAGAAGAATTTCAACCAGAATTGATTGAC  
 TATATATACACAGTAGTTGACGCCTTGGCATCACCGTCCGAAGCCATTAGGTATGTGAGCCA  
 ATCCTGTGCATTGAGGATAGCAGATACCCTATATCATGGGTCTATCCCAAACATGATCTTAA  
 GCAACGTAGATTATCTTGTAGAATCTATTTCTCAAGATTGAATCTGGGATGACTGAACGA  
 GTGAGCCAAATATTAATGGTGATTTGCCAATTGGCTGGCTATGAAACCATTGAAAATTTTAA  
 AGATGTTATTGAAACGATATTTAACTACTGGATTATTATCATGGATATAGTGATCTCTGTC  
 TTCAATTTTTCCAACATTTAAAATCATCATTTTGGAGATGAAGAAAAATATATCAATGAT

GATGAGATGATTTTGAAAATAGCTAATCAACACATTTACAAAAGTACTTTTTTCGCCCTGGGG  
TATGACCGATTTTCAGCAAGTACTCAATATACTAGATAAAAGAGACACAGGTTAAAGATGACA  
TAACAGACGAGAACGACGTCGATTTTTTTGAAGGATGATAATGAGCCCAGTAATTTTCAAGAA  
TATTTGCGACTCCAAATTAAGAGAGCCAGATAGCGACGACGATGAAGAAGAAAGAGAAGAAGA  
GGTGAAGGAAGTTCTAAAGAGTATACTGACCAGTGGACCTCACCTATAACCATCAGATTCAT  
ACAAAATACTATTGCAAATTTGGGTTATGGGGAAAGATTATTAACCCATCCATCAAAAACGA  
TTAAGAGTGCAAATCTTATTGTTATGAGGCTTATATTTCCCTTGCTATCAACACAGCATAA  
TCTGTTGATAAGGGAGGTTGCTAGTACATGGGACTCCATCATAACAGTGCGTCCATGCTCTG  
ATTATTCGATCGTTCAGCCCGCATGTTTCATGCGTGGAGCAGATGATAAAAATATTCTGGTGAT  
TTTGTGCGCCAAGAGATTCATTGAACTTTGGCAGAACTGTGTCAGGATTCTTTTATATTGAA  
AGAACTGAGGATGATCCAACGGTGCACAACCATGAGAAAAAATCGATTAGTAAGCATGTCA  
AATCCCACCAGTAACCTGAAAAATGCGCTAGTATCGATGGTACATATGGTGCTAGAAGGGGTC  
AAAAATACAGAGTATTTAATTTCTGAAGCGGTACTTGAACAAATAATATATTGTTGTATTCA  
GGTTGTTCCAGTGGAGAAAATATCATCTATGTCATTGATAGTGGGGATATCGTGTGGAAAA  
TAAGAAATATAAAATTA

>YKL134C 0.72 Cold

ATGCTTCGCACGATAATATTGAAAGCCGGGTCCTAATGCCTCCATACCGTCACCTTCCCGCCA  
AAATAAGTTACTCAGGTTCTTCGCCACAGCCGGCGCAGTCTCTAGGACCAGTCCAGGAAGCA  
TTAAGAAGATTTTCGACGACAATTCATATTGGAGAAATATTAATGGTCAGGATGCTAATAAT  
AGCAAGATCTCACAATATCTTTTTAAAAAAAATAAAACCGGACTTTTTCAAGAACCCTTATTT  
GACTTCTCCAGATGGTTTTGCGTAAGTTTTAGCCAGGTTTTCTTGCAGCAAGCACAAGAACTTC  
TCGACAAAATGAGGAATGATTTTAGCGAGAGTGGTAAATTAACCTATATTATGAACCTGGAC  
AGATTAAGCGATACGCTATGTCGAGTTATTGATTTGTGCGAGTTTTATTAGGTCAACACATCC  
AGATGATGCATTTGTTAGGGCAGCACAAGATTGCCATGAACAAATGTTTGAATTCATGAATG  
TCTTGAACACTGATGTTTCCCTTATGTAACATACTAAAGTCGGTTTTTAAACAATCCAGAAGTG  
TCTTCGAAGTTAAGCGCAGAAGAAGCTTAAAGTTGGTAAAAATATTATTGGATGATTTTTGAAA  
GTCAGGAATCTATATGAATCCAGATGTTAGAGAAAAGTTTATCCAGTTATCTCAGGAAATCA  
GTTTAGTAGGTCAAGAATTCATCAACCATACAGACTATCCTGGTTCAAATTCGTGGAAGATA  
CCATGTAAAGATCTGGATAATAGTAAAGTGAGTACATTTCTATTGAAGCAATTAATAAAGA  
TGTAAGGGGCAAAATTATAAAGTACCTACATTTGGGTATGCAGCTTATGCATTATTAATAA  
GTTGTGAAAATGAGATGGTAAAGAAAAGTTGTGGACCGCTCTTCACAGTTGTTCTGACAAA  
CAGGTTAAAGATTGAGTCACTTAATCAAATAAGGGCAATCTTGGCTAATTTAATGCACAA  
AACAAAGTTACGCAGAGTATCAATTTGGAAGGTAAATGGCAAGATCGAAGATGTCAAGATTTTA  
TTTTGACGTTAATGAACAATACTATAGAGAAGACAGCAAATGAATTGAAATTTATAGCTGAA  
CTCAAGGCCAAAGATCTTAAGAAGCCGTTGACTACAAACACGGACGAAATATTGAAGCTCGT  
GAGACCATGGGATAGGGATTACTATACTGGCAAATATTTCCAGCTCAACCCGTCAAACCTC  
CCAATGCCAAAGAAATAAGCTATTATTTTACATTAGGAAATGTCATTCAGGGCTTGTGAGAT  
TTGTTTCAGCAAATATATGGTATTAGATTAGAGCCAGCAATTAATGATGAGGGAGAAACATG  
GTCCCAGACGTGAGAAGATTGAATGTGATATCTGAAGAGGAAGGAATCATCGGCATAATTT  
ATTGTGATTTATTCGAACGAAATGGCAAGACTTCAAATCCGGCTCATTTCACAGTTTGTGTC  
TCTAGGCAAATATATCCAGTGAAACTGATTTCTCAACCATCCAAGTCGGTGAGAATCCAGA  
CGGTACCTACTTTCAATTACCTGTTATTTCTTTGGTGTGTAATTTTTCTCCAATACTAATCG  
CTTCTAAAAAAGTCTTTGTTTTTTGCGAGCTTAGTGAAGTTGAAACGCTCTTCCATGAAATG  
GGACATGCAATGCACTCAATGTTAGGGGAGAACTCATATGCAAAACATAAGTGGTACAAGATG  
TGCTACTGATTTTGTAGAGTTACCAAGTATCCTGATGGAGCACTTCGCTAAGGATATACGAA  
TTCTGACAAAGATTGGCAAACATTACGGGACTGGAGAAACAATTCAGGCTGATATGTTACAG  
CGCTTCATGAAAAGCACTAACTTCCTTCAAAATTTGTGAAACATACTCTCAAGCAAAGATGGC  
TATGCTGGATCAATCATTTCATGATGAAAAATCATTTCGATATTGATAACTTTGACGTTG  
TGGAAAACATCAAGCACTAGAACGACGTTTAAAGGTCTAGTGGACGATCAGAGTAATTGG  
TGTGGAAGATTCGGCCATTTATTTGGATCGGGGCAACTTATTACAGCTACTTATTTTGATAG  
GACGATAGCTTCTAAAATCTGGTACGCCCTTTTCGAGGATGATCCGTACAGTCGAAAAAATG  
GTGATAAATTTAAAAAGCATTACTAAAATGGGGAGGGCTAAAAGACCCTTGGAAATGTATC  
GCTGATGTTTTAGAATGCCCATGCTAGAGAAAGGCGGTAGCGATGCGATGGAATTTATAGC  
ACAGTCTCACAAGTCTTAG

>YDR521W 0.73 Cold

ATGAAAGGTTCAAAATCGCACCTTGTCTTCACTCTCCTGCAAGTATCACAACATAAATGTTTT  
TCTTTTCTTTCTAGGTTTTTTTGTGGCCATTATTCTTAGGACTGTTTCGTTTCACTGCGCTCTT  
TGGCTCTTGCACATCCTCTGGGTGGTTTATTATGGATCTGATACTATTTTCGCACCTTCCA  
GAAGCAGAATTATATCCAGCAGTCATCGGTAAACCATCTGGTCTGGGGCTTACTGAGGCATT  
TGAGTTTATATCCATTTTTTTTCCCTGATGTTTTCAGCAAACCGAAAGAAATATAAAATACAAC  
GGGAAAGATGTTTTAATGGTGAGTAA

>YCL014W 0.76 Cold

ATGGAGAAAGACCTGTCGTCTCTTTACTCTGAAAAGAAAAGACAAAGAGAACGATGAAACCTT  
ATTTAACATCAAACATCCAAATCTGTTGTCGAGACCACACCGCTAAATGGTCATTTCATTGT  
TTGATGATGATAAATCACTTTCAGACTGGACGGATAATGTGTTCACTCAATCAGTATTTCTAT  
CACGGGTCAGATGACTTGATATGGGGGAAGTTCTTTGTCTGCGTGTACAAGTCCCCAACAG  
CAATAAGTTGAAACGCTATAATATTCGACAAAATTAGGAACATCATGCTTCGAATCCGTCGATA  
TATCTTCCAACCTCGCAATACTATCCGGCCATTGAGAATTTGAGTCCAAGTATCAGGAAAGC  
AATGTTAAGAAAATGCATTGCTGTCATTCTGTTACAGCGCTATCCATTACTTTACCATCAGA  
CTTATCACAAATATTGTCCAATAAATCGGAAAATTGCGACTATGACCCCCCTTATGCTGGAG  
ATTTGGCTAGTAGTTGCCAGTTGATAACAGCAGTTCCTCCAGAAGATCTGGGGAAGCGCTTC  
TTTACATCAGGACTTCTGCAAAAATAGATTTGTCAGCTCTACCCTGTTAGATGTTATTTATGA  
AAACAATGAATCCACCATCGAACTAAATAATAGGTTGGTATTCATCTGGGTGAACAACCTG  
AACAACTTTTTTAACCCAGTCACAGAATACTCACCGAACAGACAGAATATGGTTATAAGGCG  
CCAGAGGACGAATTACCCACAGAATCGGATGATGATCTTGTCAAGGCCATTTGCAACGAGTT  
ATTACAACATAAACAATTTTACTTTCAATTTGGTAGAATTTTTTGCAAAAATTCCTGATCG  
CCTTGAGAGTCAGAGTACTCAATGAAGAAAATTAATGGGTTATCCACAACCAAATTAATTCGA  
CTCTTCCCACCTACAATAGATGAAGTCACAAGAATCAATTTGATTTTTTCTAGACTCGCTAAA  
GACAGCAATCCCTTACGGTTCCCTCGAAGTACTGAAGGCATGCAGCATTACTATTCTTTATT  
TCTACAAAGCATATACAAGACACGAGGCGGCCACAAAGAACTTCAGCAAAGATATTAATTTG  
TTTATTAGGCATTTTCAGCAATGTAATTCAGAAAAGAGAGGTCTACACGGAAATGAAAATCGA  
GAGTATAATTAAGGGACCTCAGGAAAACACTACTGAAGCTAAAGTTAATTTATAGAGAGATTGT  
GGAAGTCGAAAAAATGGAGACCGAAAATCAAGAAATGGCAAAAAAATGCTACAACAATATC  
ATTGATGTCATTGATTCGTTTTGAAAATTAGATTTCCCACTTCATTCTTATAGTACCAGAGT  
ATTTACTCCATCGGGAAAATCCTTACAGAATTAGCCAAATGCTGGCCCGTAGAAGTCAAT  
ACAAATGGCTGAAGAGAAGGGTAGTCGGTGTGATGATGATGATGATGATGATGATGATGATGAT  
AAGAGAAATTTATTAGTCATATTCAGTGATTATGTGGTTTTTCATCAATATACTGGAGGCAGA  
AAGTTACTACACTTCAGATGGATCAAACAGGCCCTTAATCTCAGATATTTAATGAAGTCAAT  
TGATCAACGAAGTTCCGTTGCCCTCCAAGATCCCTAAGTTGAAAGTGGAGCGTCATTGCTAT  
ATAGATGAGGTTCTAGTTTTCTATATTAGACAAAAGCACTCTACGTTTTGATCGATTGAAGGG  
AAAAGATTCTTTCTCAATGGTATGTAAATTATCCTCTGCATTTATCTCTTCTTCGTCAGTTG  
CTGACTTGATTACGAAGGCTAGAATTTTGGAAAAGACACTGCATTTCAATTTATTTAAAGCT  
AGTAGAAGCCATTTTACATTATATTCTACTGCTCACGAGCTTTGCGCTTATGATTCCGAAAA  
AATAAAATCAAAATTTGCCTTATTCCTGAACATACCACCATCCAAGGAGATATTGGAGGTCA  
ACAACCTTCATTTGGCTTTTTTTGCAAGATTTTGCAGTAACGATGGTAGAGATAACATCGTA  
ATCTTAGACGTCTTAACCAAACATGACGATAAACATATAGAAGTTACATCCGATAACATTTGT  
TTTACCATAAATTAATCAATTGGCCATTGAAAATACCGATATGCTTTTCTCCTTAAACTCAT  
CGATGGCCAAAGATTTACTCTGTGTAATGAGAATTTGATAAAAAAATAGAACATCAATTTG  
GAAGAGGTCAAGCACCTTCAACAGACGAACATAGGGCTGTTAATAGCAAACCTTTCCGGTGC  
ATCCGATTTTCGATGCTACTCACGAGAAGAAAAGATCATAACGGTACCATAACAACATTTAGAA  
GCTATAACAAGCGACTTGAAGGACAGTCCATCAGGCGATAATAGTAATGTCACCAAGGAACT  
AAGGAAATTTTACCAGTGAAACCTACGAAAAAGTCTTCAAAAAAACAAGAGAAATTCAAAA  
GAAGACCAAGACAAACGCCTCTAAAGCAGAGCACATAGAAAAGAAGAAGCCTAACAAAGGCA  
AAGGGTTTTTTGGCGTGTAAAAAATGTTTTTGGAAAGTAAAAGCAAGAGCAAGCCTTCACCA  
GTTCAAAGAGTGCTAAAAAATATCGCAGAGGCATCCTAAGTCTCCAGTGAAGAAGCCAAT  
GACCTCAGAAAAGAAATCCTCCCCTAAAAGGGCAGTTCGTTTCATCTCCCAAAATTAATAAAGA  
AAAGTACTTCTTTTCCACAAAAGAATCACAACTGCTAAATCTTCTCTTCGAGCAGTTGAA  
TTCAAATCTGATGACTTGATCGGAAAACCCTGATGTTGGAAATGGCGCACATCCTCAAGA  
AAATACCAGAATATCTTCAGTAGTAAGGGATACAAAATATGTCCTCCTACAATCCCTCTCAGC  
CTGTGACAGAAAAATACCAGTAACGAAAAAATGTCGAACCAAAGCGGATCAATCCACAAAG  
CAGGATAACATTTCCAATTTTGCAGATGTAGAGGTATCTGCGTCTTCTTATCCTGAAAACT

TGATGCAGAAACAGATGATCAAATAATTGGGAAGGCGACGAATTCGTCATCAGTTCATGGAA  
ATAAAGAGCTGCCAGACCTTGCTGAGGTGACTACAGCAAATAGGGTTTCTACAACATCGGCT  
GGGGACCAACGTATTGATACCCAAAGCGAATTTTTACGTGCAGCTGATGTTGAAAACCTAAG  
TGATGACGATGAACACAGACAGAATGAAAGTAGAGTTTTTAACGATGACCTCTTTGGTGATT  
TTATTCCTAAGCATTACCGTAATAAACAGGAGAACATTAACAGCTCGAGTAATTTGTTTCCA  
GAGGGAAAGGTGCCCAAGAAAAGGGCGTATCAAATGAAAACACTAACATATCTCTCAAAC  
TAATGAAGATGCATCTACATTGACGCAGAACTCTCTCCACAAGCGAGTAAAGTGCTGACAG  
AAAATTCTAATGAATTTAAAGATACCAACAATGAAGGGAAGGACGCAAAGGACATAAAAATTA  
GGAGATGATTACAGTGATAAAGAAACAGCGAAAGAAATAACTAAACCAAAAAATTTTGTGGA  
AGGAATAACTGAACGGAAGAAATATTCCCCACTATTCTAGGTTAGCGCCGCCAGCTTCAA  
AAATTAACCTTCAAAGGTCACCATCCTATATTGAGCTCTTCAAGGAATGAGGGTGGTTTTA  
GATAAGCATGATGCCATTATACTGGAAACGCTTGGCTAGTCAAGTCTCCTTAAGTGAGGG  
ACTAAAAGTCAATACTGAGGAAGATGCGGCAATTATAAATAAAAGTCAGGATGATGCCAAGG  
CGGAAAGAATGACTCAAATTTCTGAAGTGATTGAGTATGAAATGCAGCAACCTATCCCAACT  
TATTTGCCTAAGGCGCATCTAGATGACTCGGGTATTGAAAAAAGTGATGACAAATTTCTCGA  
AATTGAAGAAGAACTTAAGGAAGAATTGAAGGGCAGCAAAAACCGTAATGAAGATGTCCGGTA  
ATAATAATCCATCCAATTCTATTCCAAAAATCGAGAAGCCCCAGCATTCAAAGTTATTAGA  
ACATCGCCTGTGAGAATTATCGGAAGGACTTTTGAAGACACTAGAAAATATGAAAATGGCTC  
TCCATCTGATATTTTCGTTCACTTATGATACTCACAACAATGATGAACCTGACAAAAGGCTGA  
TGGAATTTAAATTTCCATCCCAAGATGAAATTTCCGGATGACAGATTCTATACTCCAGCAGAG  
GAACCCACTGCTGAATTTCCGGTGGAAAGAACTTCCAAATACTCCGCGAAGTATTAACGTTAC  
AACTTCAAATAACAAGAGCACAGACGATAAGTTGAGTAGCGGTAATATTGATCAAAAAACCTA  
CCGAACCTGTTAGATGATTTAGAAATTCAGTTCATTTAATATAGCATTTGGAAATACCTCCATG  
AGTACTGACAATATGAAAATATCATCCGACTTAAGTTCGAATAAAAACCGTGTTAGGAAATGC  
TCAGAAAAGTTCAAGAGTCTCCTAGTGACCATTAATCTATGTTTTGCCTCAGAGTAGCACAA  
AGCATGAGAAAAGGGGTTCCCTCGAAAAGAAACAAAAGACGAGCCATTTGGGTTTTCCCT  
AGCAAATTTGACTTTGCTGATCTAAGTAGGAGAACTAAAGCATTGACGCCAGAGCGTAATAC  
TGTTCCTTTTGAAAACAACGACAGTAGAAAATACAAATATACTGGAGAGGGATCTATCGGTA  
ATATGACAAATATGCTGTAACTAAAGATGCTTCGTACGCGTACTTAAAAGATTTTGTGCG  
TTGAGTGACGATGAAGATGAAGATGGGAAACAGAAGTGCCTGTTGGTGGCCAGAGAACT  
GAAATTTTATTGA

>YIR026C 0.81 Cold

ATGGCTGGAAATGCAAACCTCAGTAGACGAGGAAGTTACCAGGATATTAGGAGGCATATATCT  
TGGCGGAATCCGTCCAATTATTGACCACAGACCATTGGGTGCAGAATTTAACATTACTCATA  
TTCTTTCTGTTATCAAATTTCCAGGTCAATCCAGAGTATCTAATAAGGAAAGGTTACACGCTA  
AAAAACATACCCATCGATGATGATGATGTGACTGATGTGCTGCAATACTTCGATGAAACGAA  
CCGATTCATTGATCAATGCTTGTTCCCCAATGAAGTTGAGTATTCGCCAGATTAGTAGATT  
TCAAGAAGAAACCACAACGTGGTGCTGTTTTTGTCTCATTGTCAAGCAGGACTCTCGAGATCT  
GTAACCTTCATAGTAGCCTACCTAATGTATCGTTATGGATTGTCACTATCAATGGCTATGCA  
CGCTGTCAAGAGGAAGAAACCGAGTGTGAGCCAAACGAGAATTTTCATGGAACAATTACATC  
TCTTTGAGAAAATGGGTGGAGATTTTGTGATTTTCGACAACCCAGCCTATAAGCAGTGGAAAG  
CTGAAGCAATCTATCAAGTTAGATCCATCGGGCAGCGAATTTGGTCTCCAATTTCTGGAATGTT  
TAAAGATTCGGAGTCGTCGCAAGACTTGGATAAATTAAGCTGAGAAGAGCAAGGTCA  
CCGAGTGAGATGTAAGAAGTGCAGAACCAATTTGGCGTTATCTACATCTTTTCATCGCGCAT  
GACCCACCAAGTAAGGAATCATCAGAGGGACACTTCATCAAGAGGGCCGCCAACTCCCATCG  
TATTATTGATATTCAAGAGTCACAAGCAAATTTGCTCTCATTTTTTTCATCGAACCTTTAAAT  
GGATGCAACCTGAACTACAAGGCAAGCAAGAGTTAGAAGGGAAGTTTTTCATGTCCAGGCTGT  
TCAAGTAAAGTTGGCGGTTACAACCTGGAAAGGATCTAGGTGCAGTTGTGGTAAGTGGGTCAT  
CCCCGCTATCCACCTGCAAACCTAGTAAAGTGGATCAATTTCCCTTACAATCCACTGCTTTGC  
CCAACATGGTTAATTTTTGAATCCGAGAAAGTAAATAGATAA

>YJL220W 0.79 Cold

ATGTGCTTTTTCGATCAAGGCAAAGCAGTCCCTCGTTTCGTACCGTAGGTTGGCCAGACCTTTT  
CGTAGTTGGCAATATCGTAACCCATATCATCTTGTGGCGAGTCGTAAAATGGCGAGATCCAA  
ATGGCATCGGTACCAAGCTCTTTGATGTACTCCAACCTGGAGGCAATACCCTTCATATCACC  
CCAACCATCGTTGTTGGAGTCTTTGAAACTTGCGGGATAAATTTGATAAATTTGTGGCCTCTT

TCCACCACTTGGGTTCTGTTTCTGGATGTGCAGAAGAAATAGTCATTGTACGTTGCTTTCTT  
ATCTCTATGAAAAAAGCTTTTCACTTTTGTGTGTTTGGATTGGTGAATGGAACATATATT  
CTAGTACAGCTAATTCCTCGAGTGAAGAAGTCTTCCTTACTTATATATGTCTGTGGACGTCT  
TACGAATGATCGAAAATAA

>YLR361C 0.79 Cold

ATGATCCGGTTACCGAGGCTGTATCAAAGGTACCTATTATACTTGGTAGTTTTTGTAGTGAT  
TGCCCTATTTTACTTCCCTACAGGCGCCAAGAGTTGAAGAGCACATTGGTTTCGACCTTGCAC  
TCCCGATATCACACGTTGATAATCTATGGTTCCAAAATAAAGGTCTAGAGGGATTCTCAAAT  
GACGATAAGCTAGTTGTAAATATAGGCTATGACGAATGTTTTCATATTGGTCGTTTTTATGA  
AGGATGTTTTAATCGGCATGAACTTAAATCAACTTTAACTGATGGGCACCAATACTTACAAA  
GGAAAAGAATTCATAAAGACTTGAGAGGTTCCTTTGGACGCAGGTGGTTTGGAAAGTCAGAA  
TACCTTTACTATGATGTGTTATACCCTGCTTTGGTGGACTACTTTGGATCCAACCTAGAAAA  
GCTAAATGTTGAGGCAGTAACTGGAATTTCCAAATATCCTAAAGACAAAATCGCTACCCTTTA  
TGGATGTATCCATCACATTCGAGCCTATTAGCATAGAATAATTGCAGAAAAGGAGCTACATA  
AGCGATATTAACATTTCTTTTGGTGTGATTGCATCCAGCCGATAGCAAAATTGGACTCTTCA  
AAAAGAATTTCCCTTAGTAAAAATACCGCTACAGCGAACCTGCTTATTTGACTTACAAAATTCG  
TTGGTACTCGTCTGTAGACACAGGAGCTCAACGGCTGCAAGAACTGATGAAGGAAAAGTTC  
AAAATTGTTTCAAGTTGGCGGATCTCCACTTGGGTGTGGGGGAGTCTGAATGTATCGATGAGTA  
TCCAAAGCATGAAGCTTGCAAGGCAGATCCAAAAACGGAAAATTTTCGTTCAACAAGTTCCTG  
ACATTGAAAAACCGCAGTTGGTTGTTTTTACTGGTGACCAAATCATGGGTGATAGATCTATT  
CAAGACTCTGAAACCGTATTATTAAGGCGGTAGCACCCGTCATTGCAAGAAAAATTCCGTG  
GGCAATGGTATGGGGAAATCACGACGACGAGGGAAGCTTAACGCGCTGGCAGTTATCCGAAA  
TAGCTTCAGTACTACCATATTTCCCTTTTTCAAGTTTAGTCCCCATGATACACAGATAATACG  
TTTGGCGTTGGTAATTATATTTATCAGATTTTTTTCGAACAATGATACAGAAGTCCAGTAGG  
TACACTTTATTTTCTGGACTCACATAAATATTCTACGGTTGGTAAAATTTATCCTGGATATG  
ATTGGATTAAGGAATCACAGTGGAATACATTGAAGATTATCATGATGTGAACCTGAAGTTC  
AAAACAGGTCTTTCAATGGCATTTTTTTACATCCCCTGCCAGAATACTTGAATATTGAATC  
CAAGACACATCCCGGAGAGAAAAATCCCCTCATTGGAATGTACAAAGAAAGGTGTTACTGCAC  
CTAAGTATAAATCTGAGGGGATAACAACCTTTGGATAGGTTAAGTGTGGATGTCGTCAGTTGC  
GGACATGACCATTGTAACGATTACTGTCTTCGAGATGACTCTACGCCGAACAAAATCTGGCT  
ATGCTATGGCGGTGGAGGTGGAGAAGGTGGTTATGCTGGCTATGGAGGTACAGAAAGACGTA  
TCCGTATTTATGAAATTAATGTAATGAGAACAATATACACACATGGAAAAGATTAAATGGC  
AGTCCAAAAGAGATTTTTGATTTTCAGTCTATGTTGGACGGTAATTCTCCAGAATCTGTTTA  
A

>YKL016C 0.82 Cold

ATGCTTTTGGCCAAATCCGCTGCTAACAACTTGACTGGGCAAAGTCATCTCTTCTCTACG  
TATAACAGGGTCGACTGCCACTCAATTATCGAGTTTTTAAAAAGAGAAAACGATGAGGCACGTA  
GACAATTAAGTACTAGAGCTGCAAAGTCAACCCACCGAAGTAGATTTTCAAGTCAATATAGATCTGTG  
TTGAAAAACACTTCAGTCATTGACAAGATAGAATCATACTGTTAAGCAATATAAGCCGGTCAA  
AATCGATGCCTCCAAACAATTACAAGTGATTGAGTCTTTTGAAGACGCAATGACCAACG  
CCAAGGAGACAGAATCCTTAGTTTCCAAGGAGTTAAAGGATTTGCAAAGCACCTTAGATAAT  
ATTCAATCTGCAAGACCTTTTCGATGAATTAAGTGTGACGACCTGACAAAGATCAAACCTGA  
AATTGATGCTAAGGTAGAAGAGATGGTCAAGAAGGGTAAATGGGACGTACCTGGTTACAAGG  
ACAGATTCGGCAATTTGAATGTGATGTAG

>YKL050C 0.79 Cold

ATGTCACATAATATCTGCGTTGCAAACCACCGATGTGGAATCTGTCCAGACGTCCCCTGAGCA  
AATTAAGTAAAGAAAGGCGGTAGAGTATCCACTTTGCAAGAATCGCTACATTTCTCTGAAA  
TGCATCGCGCTGCTCCAGAAACACCTCGCTCAATTTCAAATAGCGTTACAAAACCTGAAAAC  
ATATATTCTACTTACCAGCAGAGTGGACAACCATTGAGTAAAGAGGCGATATTCGGTGGCAA  
ACAGAAGTATGGCATTGTAATACTCCGGCTAATTACAAAACCTTGGTTTAGGAGACTCCA  
AGAGTGAGTCAGTTGATCTTTCGGCCCCGTTTAGCTAGTAAGAGAACGAAAGTCTCGCCTGAT  
GACTGTGTCGAAACAGCAATCGAGCAAAAGGCCAGAGGTGAGGCTTTCAAAGTAACCTTTTC  
CAAGATTCCATTGACCCCGCTGAAGACGTCCCAATAACGGTCAATTTAGGTCTGAAGGGAA  
GGCGTGATTTTTTAACAAGATTAGCTGCACAAAAGCATTTGGCTTTTCAGTCTTTCTTAGAC

AATTCATGAAGGGCACCTCCGACAGTTCCAGTGTTAAAAAAGAGGTTTTCTGGTGCCCC  
TATTGGTAATGAGTTTGTATGCAAACCTTAGTTAATCCACAGCACCCCTGCAGGTTTCAAATCCC  
TCGATTTATCTAAGGTATTGGATGGAGCGGAAAGAAGGGCGATTAGCAGAGTTAATGACAGG  
TTGTATCCCCAAAAGGTAAACTTTAAAAATGGATTACAAAGCAGCGATCAAAGTGGTGTATC  
AAAAGCTAACAAAAGAAGTTTTTAAGAAAGGAACTTTGAAAAACTTGAACATTCGCGAGAGC  
AGTTCCTAGAGTCTCATGCTGGTAATGAAAGACAAAGGCTAAGTGATCAACAATATATGTGT  
GCAAAGGGTGCAGCTGATGCAGTTAAAGATCTTGACCCGAAGACATTGGAAGACCCAGATTT  
TGCTGCAAGAGAGGCACAAAAGAACTGTACATAAAGCAGGTAGCATCTCCGGTAGTGCTAA  
ATGAAGCTCAAAGCTTGCGAATAGGAAATGCAGGATATTGACTCGCGGATACTTACATG  
CTTTTATTTGGTAACCAAGCTTACAATAAGCTTGCTGTTAACATAGCTCTACAGCACTATTC  
TGTTAAACAAGAAGAAAAAAGAAAATATATTTGGGTGGTGGTTTGTGGATGACTCCAGAAG  
AGGTTAACGCAGTCGCCAAAAAGTTGATATCACCAGTGGTGAACGAAATGATGAACGAGCC  
AGCAGACAACGTGATGTTGATAAAGATATTGAGAGAAGGTCAAGAGTTCTTGATCAGGAATA  
TGAGGATGGGAATCTATGGAACGTGCAAAAAGAGCAAAACGACGGGCAATTTATTGTTAGCGA  
TGGCTTCAAAAACAACAGGAGAAAGACTAAAAAGGCCGAGGAGGGACAACGGTATGAT  
CAGTTCGTACAAAAGATGAATATCAAATTACAGCAGAAGGAAAAAGAAGTTGAAAATGCTAG  
GGAAAATCGTGA AAAATCTAAGAAACGAACTACAGGAAAGGTTGTCCAAGAACCTGTCAGGAG  
AGAATGATGAATTGAATGATTGGAACGATGCATGTGAAAAGAGATCTCAAAAATTCGAGCATT  
GAACACTATTATGCCGTCAGATCACACTTTGACAATTTGGGAAATTCGAAAAGAGGGTATGA  
TGAGCTTTTGGAGGAGCGCAGCAAAAATACAGGTAGAAATCGAAAAGACTTGTCTGCTCCATTG  
CTGAACATAAAAAGTGAATCCATGGTTTTGGGAAACAGCAGATGCTGGTGGAGCTATACCA  
GCTGTACAGAAAACAGAAAATTCCAACAAGGAAGGACCTTCTTGATGCTACCGTGAATGATCC  
TTTGGTTATTTCTGCAGAAATGGCAAAAAGAAAGCAGAAAATGGCTACAGAAGAATGTATGT  
TGAAAAGAATTACAGGTAGATGAAATGATTATAATCAGGAACATTATGCTGCGGGAGTGTGAA  
AAGAAGCTCGAAGAGGAGAAGGAAACGGCTAAGAGGTCTAGAAGGGGCACTGAGGAGTCAA  
GAATAATTTCTAATTTTTCTCGAGATGTTATCATGAGTACACCTGATAACAATGAAAAAGTGA  
CTCCTATAGGGAAGAGTGCATCTCCAAAAGATGTTGTTAAAAGCCGTTTCTTTCTACTTAT  
AATACAGGAAAGGATATTGATAGTTCTGCCAGTGCTAGGTCAATCACTGGTGTAGCGGCGT  
GTTGGATGATGGGCCATAAACACCAACCTCCAATAAGGAGAATGAATTAATTGACGATGAAG  
TGAAGTCATATAAAGTGCACCAAGCAGTAGATGGCACCGGTGAAGATTCCATCGCAAAACAG  
AGGATAAATCTTCAAGACCAGCGGCAACAGTGGAGGCTCCATAACGATAGAACAATTTTT  
ATTTAATAAGAATGCCGATAAACAAGGACTATCCAAAACAGAGTCTGTAACATGAAGAGGG  
AGCCTGTGGTGGATCAAATGGACTCAAAAAGGGGCACGATTTTACCCATTGTAACGACAAC  
GGCCGCCGGTCTTTTAGTGGCTTTTCTCAAGTTCGATAGAAAATGATTATAGTAATGAAGT  
TACAGATGATCAAGACGATCAAGAGGGATCGGAGATAAGAGTTCGCGATTCCAACGATTCCA  
ATACCTCTCCTAAGGAAAGTTTTTTCAAGAGGTTATCTAA

>YDR016C 0.69 Cold

ATGATGGCTAGTACATCCAATGATGAAGAAAAGTTGATATCAACCCTGACAAATACTTCAT  
CGAGCAGAGGAATATAGTATTGCAGGAGATCAATGAGACTATGAATTCAATCTTGAATGGTC  
TGAATGGTCTCAATATATCATTTGGAGAGCTCGATAGCTGTGGGAAGAGAATTCAGTCAGTT  
TCTGATTTGTGGAAAACACTTTATGATGGGTGGAAAGTTTATCAGACGAAGCGCCCATCGA  
CGAGCAACCTACTTTATCTCAATCGAAAACGAAGTAA

>YDR261C 0.72 Cold

ATGCCTTTGAAGTCGTTTTTTTTTTCAGCATTCTAGTTTTATGCCTGTCTAAATTCACGCA  
AGGCGTTGGCACCACAGAGAAGGAAGAATCGTTATCGCCTTTGGAACATAAATTTTTACAAA  
ACAAATTCGCCTCCTACTATGCAAACGACACTATCACCGTGAAAGGTATTACTATTGGCGGC  
TGGCTAGTAACAGAACCTTATATCACGCCATCATTATATCGTAATGCTACGTCACCTGGCAAA  
ACAGCAAACTCTTCCAGCAATATCTCCATTGTCGACGAATTTACTCTTTGTAAAACCTTAG  
GATATAACACCTCTCTAACTTTATTGGATAATCACTTCAAACTTGGATTACAGAGGATGAT  
TTTGAACAAATCAAACCAACGGTTTTCAATTTAGTTAGGATCCCCATCGGATATTGGGCGTG  
GAAACAAAATACTGATAAAAACCTTGATACATCGATAACATAACTTTCAATGATCCATACGTAA  
GTGATGGATTACAACGAAATATTTAAATAATGCTCTCGAATGGGCGCAAAAGTACGAACTA  
AATGTATGGTTAGATCTACATGGTGCTCCTGGATCCCAGAAATGGATTTCGATAATTCGGTGA  
AAGAATACTCTATGGCGATTTAGGCTGGTTAAGGTTGAATAATACTAAAGAAGTACTCTGG  
CTATTTGGAGAGATATGTTCCAGACATTTTTAAATAAAGGTGACAAAAGTCTGTGGTGGGT



ATTCAAATCGTCAACGAACCGCTTGGTGGCAAATCGATGTTTCAGACATAACGGAGATGTA  
 TTACGAAGCATTGACTTGCTCAAGAAAAATCAGAATTCGAGTGACAACACTACGTTTGTTA  
 TTCATGACGGTTTTCAAGGAATCGGTCACTGGAACCTGGAGCTAAACCCAACCTACCAGAAT  
 GTATCGCATCATTATTTCAATTTGACTGGTGCAAATTACAGCTCTCAAGATATATTGGTTCGA  
 CCATCATCATTATGAAGTGTACTGATGCGCAATTGGCCGAAACTCAGTTTGCACGTATTG  
 AAAACATTATCAATTATGGGGACTCTATCCACAAAGAACTTCTTTTTACCCAGCAGTAGTC  
 GGAGAATGGTCAGGCGCTATTACTGATTGTGCAACCTGGCTAAATGGTGTGGGGTGGGTGC  
 ACGTTACGATGGATCATACTACAATACAACGTTGTTTACCACCAACGACAAGCCAGTTGGAA  
 CATGTATATCCCAAATAGCTTAGCTGATTGGACGCAAGATTACCGTGACCGTGTGAGACAA  
 TTCATTGAGGCACAGCTAGCCACTTATTCGTCAAAAACAACGGGATGGATTTTTTGGAAATG  
 GAAGACCGAAGACGCCGTAGAAATGGGATTATTTGAAGCTAAAAGAAGCTAACCTTTTTCCCTT  
 CCCCTTTCGACAACCTACACGTACTTCAAAGCAGATGGATCTATCGAAGAAAAATTCATCC  
 TCTTTATCAGCACAGGCATTTCCAAGAACAACGTATCGGTTTTGTCTCCACTACGACTTC  
 CAGGAAGAGTAAAGATGCTGCAATTTCTAATAAACTAACAACCTTCGCAGCTATTACCAATCA  
 AAAATATGAGTTTGACCTGGAAAGCGAGCGTATGCGCACTCGCTATCACCATTGCCGCTCTT  
 TCGCTTCTCTTTAA

>YDR253C 0.8 Cold

ATGGAGGATCAGGATGCTGCATTTATCAAACAGGCTACAGAAGCAATAGTGGATGTATCATT  
 AAATATAGATAACATAGATCCTATAATAAAAAGAGTTATTAGAAAGGGTAAGGAATAGGCCAAA  
 ACAGGTTACAAAAATAAAAAACCAGCACTCATACCGGCAGAAAATGGTGTGATATAAAATAGT  
 CAAGGCGGTAACATAAAGGTTAAAAAGGAAAACGCATTACCAAACCACCGAAGTCCAGCAA  
 AAGCAAACCCCAAGATCGTAGAAATAGTACTGGTGAAAAAAGATTTAAATGTGCGAAATGTT  
 CGTTGGAATTTTTCAAGATCATCAGATTTGAGAAGGCACGAAAAGACACACTTCGCCATATTG  
 CCTAACATTTGTCTCAATGTGGCAAAGGTTTTGCAAGGAAAGATGCATTGAAAAGACATTA  
 TGATACTGACATGTAGGAGAAACAGGACTAAATTAATACTGCGGGTGGTGAGGGTATCA  
 ATGAATTAAGTAAAAAGTCAAGCAATCCAACATCGTTTCATCGTCAAGATAACAACCACAAT  
 GGTAGCAGTAATGGCTGA

>YOL142W 0.8 Cold

ATGCTACGTTTCATATTCCCTGGTGATAGCTTTCCTGTAGACCCTACTACACCTGTTAAACT  
 GGGCCCTGGCATATATTGTGACCCCAATACTCAAGAAATACGACCTGTTAATACAGGTGTTT  
 TGCATGTTTTCCGCTAAGGGTAAGAGTGGTGTTCAGACCGCATATATAGACTATTCTAGTAAG  
 AGATACATTCCATCTGTAACGATTTTTGTAATCGGTGTCATTATAGGGACATTTTCAGATAG  
 CTATAAGGTTTTCGTTGCAAAATTTCTCCTCCAGTGTTCCTACTATCGTATATGGCTTTTCCA  
 ATGCTTCAAAGAAAAACAGGCCAACTTTGCAAGTGGGAGATCTAGTGTATGCGAGAGTTTGT  
 ACCGCAGAAAAGGAACTAGAAGCCGAAATAGAATGTTTTGACTCAACTACAGGACGCGATGC  
 TGGTTTTCGGGATATTGGAAGATGGTATGATCATTGACGTGAATTTCAATTCGCACGCCAGT  
 TGCTTTTTCAATAATGACTTCCCGTTATTAATAAGTGTGGCTGCACATAACCAAGTTTGAAGTC  
 GCCATTGGTCTCAATGGGAAGATCTGGGTTAAGTGCAGGAATTATCTAACACTTTAGCTTG  
 TTATAGAACCATAATGGAGTGTGTCAAAAAACGACACGGCAGCGTTCAAGGATATAGCAA  
 AAAGACAGTTTTAAAGAAATACTTACGGTCAAGGAGGAGTAG

>YOL150C 0.76 Cold

ATGATAAAAAATAATTGTAATAACGTTAATATATATAAAATATTATCTATTTTCATTTAAAGT  
 TTATATTCTGCCCTCAAATTTTAAAATTTGGGAGGCAGTGTCTCAATGGTCTCTTTCAAGT  
 TCCTGAACTTGAAACCTAACAAATTTCTTACTCTTTTTATTATCAAGAGTAGCACCAGGGTG  
 TTATGGGTAGCACCAGAACCTGGTTTTCCCACTGGAATATTGCCTTTTAGAACAGGGAAGTC  
 TTCGTTAAGGATATCGAGAACATCCTGCATAGTAAATCTGGCCTCCGATACGATTAGTCTTT  
 GA

>YOL140W 0.78 Cold

ATGTTTTAAAGATATTTATCCAGTACGTCAATCAAGAAGATTTACAAGCATTTTAGAGGAAAA  
 GGCCTTTCAAGTGACCACTTACTCTAGACCTGAAGATCTATGTATAACTAGAGGTAATAATG  
 CAAAGCTGTATGATGACGTGAATGGTAAAGAATATATCGATTTACCCGACAGGATTTGCGGTG  
 ACCGCATTAGGCCATGCAAATCCTAAAGTGGCAGAAATTCCTGCACCATCAGGCTAACAACT  
 GGTTCATTCTCCAACCTTTACTTCACTAAGGAATGTTTGGATTTAAGTGAAGAAGATTGTTG

AAAAGACCAAGCAATTCGGTGGTCAACACGACGCCTCAAGAGTATTTTTATGTAATTCTGGT  
 ACGGAAGCAAATGAAGCTGCTTTGAAGTTTGCAAAGAAACATGGTATAATGAAAAATCCTAG  
 CAAGCAAGGCATTTGTTGCATTTGAGAACTCTTTTCATGGCCGACTATGGGCGCTTTATCTG  
 TCACTTGGAAATAGTAAATATAGAACTCCTTTTGGGGATTTGGTTCCCCATGTCTCATTCTTA  
 AATTTGAATGACGAAATGACCAAACACTACAAAGTTATATCGAGACCAAAAAGGACGAGATTGC  
 TGGTTTAATTGTGCGAGCCCATAACAAGGTGAAGGTGGGGTTTTTCCCGTAGAAGTTGAAAAGC  
 TAACCGGATTGAAGAAAATATGTCAAGATAATGATGTGATTGTCATTCATGATGAAATCAA  
 TGCGGTTTTGGGCCGTTTCAGGTAAACTATGGGCTCATGCTTATTTACCAAGTGAGGCTCATCC  
 GGATATTTTTTACATCTGCCAAAGCATTGGGAAATGGCTTCCCATCGCTGCCACCATCGTCA  
 ATGAAAAGTTAATAATGCTTTGAGAGTTGGTGACCACGGCACCACGTATGGTGGTAATCCG  
 CTGGCCTGTTCTGTAAGCAACTATGTTTTGGATACCATAGCAGACGAAGCTTTTTTTGAAACA  
 AGTCTCTAAGAAAGGTGATATCTTACAAAAGCGCTTGCGCGAAATTCAGCCAAATATCCAA  
 ATCAAATAAAGACTATCAGAGGAAAAGGTTTGATGCTTGGTGCTGAGTTCGTGCAACCACC  
 ACCGAGGTCATCAAAAAGGCCAGAGAATTGGGACTTTTTGATCATTACCGCTGGTAAGAGTAC  
 CGTTAGATTTGTTCCCGCATTAACGATTGAAGACGAACTAATCGAAGAAGGGATGGATGCTT  
 TTGAAAAGGCTATTGAAGCGGTTTACGCTTAA

>YGR187C 0.75 Cold

ATGACTTCACAATTGAATGAATTAGTGGAATTTCTGCATTCACCACAACCTGCCGTAAGACA  
 GATTGCCATTGATAATCTAGTTGGATTTAGTGCTGGTCCCACTTCAAAAAGTTTTCAAAAATG  
 ATAGCTACAGACCCATTAAGGATATAATAAAAATGATCATGGATCCAGAACACGGCACCCGCT  
 GTTATTATTAGCAAGGTGTCACTATATTGGTCAATTTATCTGAAGACAAGTTAGTAAGAAA  
 TATTATATTGAGCGATGACAAGAAGTTCTTAAAATTTTTGGTTTTGGAAAAATTGTCGATTTAA  
 CCAATCCAAATGCCGATATAATGTGTATCTTATTAAGCAACTTAGCCAAGGATGACGGCATT  
 CTTGCTGTTCTGAATATCAAAAAGGAATTCAGCGGTGAGGAGGTCGATGATGGTTTTGAAGTT  
 AGCAGCTTTAAATAAAGAAGTTTTCAAAAAGTTGAGAGCCATGGATTGTTAATGGATTGCT  
 TTGTTAAGGGTTATGATAAAAAATTAACAAAATATGCCAGTTTCAATTATTTAGCCTTTTTTT  
 TTTGCGGATATCTCGAGTTTTAAATTTGGGCAGGATGTATTTTATTGAAGAGCAGGAATACGA  
 TGGGGTTGTTCCATTTTCAAAAATGCTAGTATTTACCGAAAAATATGATGCAAAGGTAAGAA  
 GAGAAGGTGTCGCTTCCACAATTAAAAATTTCCCTATTTGATTCTGAAACTCATGAAAGTTA  
 CTCAAAGATGAAAAAATAAACTTGTTCCTTACATCCTGCTACCTATTGCTAGTGCTAAAGA  
 TTCTGAAATTGATGAGGAAGATATGTTCAATTTACCAGATGAACTTCAATTATTACCAGAGG  
 ACAAGGAAAGAGACCCGATTCCCTGCAATTATATGCTGTCAATTTAGAAAGTATTCTTTTGCTA  
 TGTACAACGCATGCTGGAAGAGAATACTTAAGAGACAAGTCCGTTTTATCCACTAGTGAGGGA  
 GCTGCATAAAAACGTTGAGAATGAAGATATTGGTGAATTTATGTTACAGAATTGTTAATATGT  
 TAATGAGAGGCGAGCCAGGTGCGGGAGCAGTGAAGAGATGCCATCAAAGAATGCGGAAGAG  
 GAAGAAGAGGAGAGAGTGAAGAAGAAGAAGATGACGACGAAGAAGATGAAATTTGTCGAAGT  
 GCCTAG

>YHR056C 0.69 Cold

ATGATGGACATGCAAGTGAGAAAAGTGAGGAAGCCGCCTGCTTGCACCCAATGCAGGAAGAG  
 AAAGATCGGGTGCAGACAGGGCCAAACCGATATGTGGGAATTGCGTCAAGTATAACAAGCCGG  
 ACTGTTTTTATCCAGATGGACCTGGTAAGATGGTTCGCTGTGCCCTCTGCGTCCGGGATGTCC  
 ACGCACGGCAATGGCCAAGGTCCAACCATTTTAGTCAGGGAAACGGTGTAATCAGAAAAA  
 CGTAATGATTCAAACGCAGTATCCGATTATGCAAACGTCGATAGAGGCATTCAACTTCTCGT  
 TCAACCCCTCTGTGGATACTGCGATGCAGTGGACCAAGGCCGCTAGCTACCAGAATAATAAC  
 ACCAATAATAATACTGCTCCTCGTCAGAATAGTAGTACCGTTAGTAGTAATGTTTCATGGAAA  
 CACTATTGTGAGAAGCGATAGTCCAGATGTGCCCTCCATGGATCAGATTAGAGAATATAACA  
 CACGATTACAACCTGGTTAACGCTCAAAGTTTTGACTATAACAGATAAACCATACTCTTTTAAT  
 GTTGGTATCAATCAAGACTCGGCCGTTTTTCGATCTAATGACTTCTCCGTTTACTCAAGAGGA  
 AGTATTAATCAAGGAGATAGACTTTTTTAAAAAACAAATTTGCTTGATTTACAAAGCTTGCAAC  
 TGAAAAGTTTTGAAAGAAAAATCGAATTTAAATGCCGACAATACCACGGCAAACAAAATTAAC  
 AAAACAGGTGAGAAATCTAAGAAAGGCAAGGTTGACGGTAAAAGAGCCGGATTTGATCATCA  
 GACTTCAAGGACTTCTCAGTCCTCACAAAAATACTTTACAGCGCTCACAATAACAGATGTGC  
 AAAGTTTTAGTCCAAGTGAACCGTTGAAGGATACCCCAACTACCTTTTCACTAAAAACTTC  
 ATCATTTTTAGAGATCATTATCTTTTCAAGTTCTATAATTTTTGCACGATATCTGCCATAT  
 TAATCAGTTCAAAGTAAGTCCCTCCTAACAAATAAAAATCACCACAATATATGGAAGTTTGCA

AAGTTAACTTCCCACCAAAGCAATAATTATTGAGACACTAAACTCTGAATCCCTTAAACAAT  
 CTGAATATTGAAGAATTTTTGCCAATCTTTGACAAAACCTCTTACTAGAATTTGTTCATAA  
 CTCTTTTCCAAATGGTGATACCTGTCCTTCATTCTCAACGGTCGATCTTCCTTTATCTCAAC  
 TGACCAAAGTAGGCGAATTAACCTGTGCTTCTACTGTTGTTAAACGATTCAATGACCCTATTC  
 AATAAGCAGGCTATTAATAACCATGTTTTCGGCATTAATGAATAATTTGAGGTTGATTGGAAG  
 CCAAATCACATTGATAAACCTGGAATATTATGACCAAGAGACAATCAAATTTATTGCCATCA  
 CAAAATTTTATGAATCTCTGTACATGCATGATGATCATAAATCAAGTTTAGACGAAGATTTG  
 AGCTGTCTGTTAAGCTTCCAGATAAAAAGATTTCAAGTTATTCCATTTTTTGAAAAAATGTA  
 TTAATCAAGACATTCGCTTCTAGGTCAGTCTTCATTTCATGGTACCCGCTGCTGAAAACCTAT  
 CTCCGATACCTGCCTCTATTGATACGAACGACATTCCTTTAATTGCTAACGATTTAAAAATTA  
 CTGGAACGCAAGCAAATTTGATAAATATTCTGCAAGGTGTTCCCTTTCTACTTGCCAGTAAA  
 TTTAACCAAATTTGAAAGTCTGTTAGAAAACCTTGACTATGGGCGTGAGTAATACAGTAGACT  
 TATAATTTTCATGACAACGAAGTCAGAAAAGAAATGGAAGACACTTTAAATTTTATCAATACC  
 ATTTGTTTATACAAAATTTTTTCCCTTTTTGTTCAAAACGAATCCTCTTTGTCATGGCAGTTCA  
 ACATTTCTTCTAACAAACAATAAGACCTCGAACTCTGAAAGATGTGCAAGGATCTGATGAAAA  
 TTATTTCTAATATGCACATTTTTTACTCAATAACATTTAATTTTATCTTCCCCATAAAGTCG  
 AATAAGTCATTTTCAAGCGGCAATAATCGCTTTCATTCTAATGGTAAAGAATTTTTTATTTCGC  
 AAATCATTTTTATTGAAATCTTACAGAATTTTATAGCAATCACATTTGCTATTTTTCCAACGTT  
 GTGAAGTAATATTATATGACGAATTTTACAAAAATCTTTCAAATGAGGAGATTAATGTTCAA  
 TTGCTATTGATTTCATGACAAGATTTTGGAAAATTTTAAAAAAAATAGAAAATTATCGTATCCTT  
 TTTACGAGATGAAATGAATAGCAACGGAAGTTTCAAATCTATTAAGGTTTCAACAAGGTTT  
 TGAATCTGATTAATATATGCTGAGATTTAGCAAGAAAAACAAAATTTTGCAGAGAACTCT  
 GATAACAATAATGTTACAGATTATAGTCAGTCGGCGAAGAACAATAATGTTCTCTTGAAATT  
 CCCCCTTAGTGAACCTGAACAGAATCTATTTAAAATTTAAGGAGATTTTCAAGATTTTTTAAATGG  
 AAAGAGAAGTTGTCCAAAGGAGTATAATTATTGACAAGGATTTGGAATCTGATAATCTGGGT  
 ATTACTACGGCAAACCTTCAACGATTTCTATGATGCATTTTATAATTAG

>YKL136W 0.72 Cold

ATGTATGGTATAATACTTAAGTTCACTACAACGGACGTTTATAGTCAGAATAAATCGAGGAG  
 ATCCTGTGACACTATATTGCCGCCGAAACATCGGGATTGTTTTTACCACCAGAAGATATAC  
 CGTTTGAGTCGCCACCTAGTTTCAGCTCCTTCAACCCTTGTACAGCCTTGGTATCATTTGTA  
 TTTATTTGTGTGGCATCCTCAGATGGTCCGAAATCAAATAAATCATCCAAATCGCCTAAAGT  
 TGTAAAGTATTTCAGCATTCTGCATTTGTATTTGTTACATCATCTCTTTCATCAAATCCA  
 ATAGCACATCATCGTTAGCCTTGTAGAAAATTTCAATTTTTTGGCATGCTTCTAATTCCTCT  
 ATATGTTTTTCCCTTAACTATATTTTGA

>YJL003W 0.81 Cold

ATGTCGTTTCAGCGGAAAAAATTTAGGTCTAGAAGACAGCAGCTAGTATATGAAGCATCTTT  
 AGCGGGGCGATACAAAAAGCATTGAGTAAGCACCCCTTCTTTTTTTTTTGGTTTACCATTTT  
 GTGCAACAATAGTATTGGGTTCTTTTTGGTTGTCAAGCTTTACAGCGATCAAGTACGAGCAA  
 GCGATCGTAAAGTTTCAGGAAATTAATGAAGAGGATATCTTGAAAATAAGGAAGAATCAAAG  
 GGAATTTGATATTAAGAAGAATATTATCGTTTACAAGGCTTTTCTGAAGAGGATTGGGAGC  
 CTGTGCGCGTCGCTAGGTTAAAGGATGAATCTGAGAATGTCTGGTAA

>YGR029W 0.82 Cold

ATGAAAGCAATAGATAAAAATGACGGATAATCCACCACAAGAAGGCTTAAGTGGGAGGAAAAT  
 AATATATGACGAAGATGGCAAACCTTGCCGATCATGTAACACCCTACTTGACTTTCAGTACG  
 TGACCGGGAAGATATCTAATGGCCTGAAGAACCCTCTCATCTAACGGTAAACTAGCAGGTACG  
 GGGCTCTCACTGGCGAAGCTTCAGAGTTGATGCCTGGCTCAAGAACATACAGGAAGGTTGA  
 CCTCCTGACGTAGAGCAACTAGGTAGATCTTCATGGACGCTGTTACACTCTGTAGCTGCCA  
 GCTATCCTGCTCAACCTACAGACCAACAGAAGGGTGAATGAAACAGTCTTGAATATCTTC  
 TCACATATTTATCCTTGCAACTGGTGTGCTAAAGACTTTGAAAAATATATCAGAGAAAATGC  
 ACCACAAGTTGAGTCAAGAGAAGAACTTTGGGAGGTGGATGTGTGAAGCCCACAATAAAGTCA  
 ATAAGAAATTTGAGGAAGCCCAAATTTGACTGTAATTTCTGGGAAAAAAGATGGAAGGACGGC  
 TGGGACGAATAA

>YNR007C 0.73 Cold

ATGATTAGATCTACACTAAGTAGTTGGAGAGAATATCTTACCCCCATAACGCACAAATCTAC  
 CTTTTTAACCACAGGTCAAATAACTCCTGAGGAGTTTGTACAAGCAGGTGATTATTTATGTC  
 ATATGTTTTCCACCTGGAAGTGAACGAAGAGTCGTCAGATATTAGTTACAGAGATTTTTTA  
 CCGAAGAATAAGCAGTTTCTGATAATTAGAAAAGTTCCCTGTGATAAACGTGCCGAGCAATG  
 TGTGCAAGTTGAAGGGCCAGATGTAATCATGAAAGTTTTGCAGAAGATGGAGATGAAGATG  
 ATGTTCTGGAATACATAGGATCTGAAACTGAACATGTGCAAAGTACGCCTGCGGGGGGACC  
 AAGGACTCATCTATCGATGATATTGATGAGCTAATACAAGACATGGAAAATAAAGAGGAGGA  
 TGAAAATGACGATACAGAAGAATTTAATGCTAAAGGTGGCCTAGCCAAAGATATGGCGCAAG  
 AAAGGTATTACGACCTTTATATTGCGTACTCGACATCTTATAGGGTCCCTAAAATGTATATA  
 GTGGGGTTTTAATTTCTAATGGTTCACCACTAAGCCCTGAGCAGATGTTGCAAGATATATCAGC  
 AGATTATAGAACAAAGACAGCCACCATTGAAAAGCTACCTTTTTTACAAGAATTCAGTGTAT  
 CTGTTTCCATTCATCCATGTAAGCATGCTAATGTAATGAAAATATTGCTAGATAAGGTTTCGT  
 GTGGTTAGACAACGAAGAAGGAAAGAGCTGCAGGAAGAACAAGAGCTGGACGGTGTGCGGAGA  
 CTGGGAGGATTTACAAGACGATATTGATGATTCGTTACGGGTAGACCAATACTTGATTGTTT  
 TCTTAAAGTTTATTACTAGTGTACACCGAGTATACAACATGACTATACCATGGAAGGTTGG  
 TAA

>YCR028C 0.78 Cold

ATGATGAAGGAATCGAAATCTATCACTCAACATGAGGTTGAGAGAGAATCTGTTTCTTCCAA  
 GCGTGCCATTA AAAAGAGATTACTTCTGTTTAAAATAGACTTGTTTGTGCTATCATTTGTTT  
 GCTTGAATACTGGATTAATTATGTCGACCGTGTGCGGTTTACCAATGCATATATATCCGGT  
 ATGAAGGAAGATCTTAAGATGGTCGGAACGATTTGACCGTGTCTAACACAGTTTTTCATGAT  
 TGGTTACATTGTAGGTATGGTCCCCAATAAATTTAATGTTATTGTGTGTTCCGCCCAGGATAT  
 GGCTAAGTTTTTGTACGTTTGGTGGGGTTTATTGACCTTGGGAATGTACAAAGTTACATCG  
 TTCAAACATATTTGCGCAATTAGATTCTTTCAAGCCTTATTTGAGAGTTGCACATTTTCAGG  
 AACACATTTTGTTTTGGGTTTCGTGGTATAAAGAAGACGAATTGCCCATTAGAAGTGCTATTT  
 TTACAGGTAGCGGTTTGGTGGGATCTATGTTTCAGTGGATTTATGCAAACAAGTATCTTTACT  
 CATTTGAATGGGCGGAATGGCTTGGCGGGTTGGAGATGGTTATTCATTATGATTTTTGTAT  
 CACATTACCATTGCAATTTATGGGTTTATTTTCTTCCCGGCCTTCTGATCAAACAAGTG  
 CTGTTAGCAAATTTTCTATGACGAGATACATTTTTTAATGAACAAGAGCTACATTATGCTAGG  
 AGAAGGCTCCCCGCTAGGGACGAAAGCACCCGGTTAGACTGGTCGACTATTCCTAGAGTCTT  
 AAAAAGGTGGCACTGGTGGATGTTCTCTCTGTTTGGGTTCTGGGAGGTGAGAACTTGGGTT  
 TCGCATCTAATTCTACATTTGCATTATGGTTACAAAACCAAAAATATACGTTGGCGCAAAGA  
 AATAATTATCCTTCGGGGATATTTGCCGTAGGTATAGTTTCTACGCTTTGTTCTGCTGTATA  
 TATGAGTAAGATCCCAAGAGCTAGGCATTGGCATGTTTCTGTTTTTCATATCATTGGTAATGG  
 TTATTGTTGCGGTACTAATACGTGCAGACCCACTAAATCCAAAAGTCGTCTTTTCTGCACAG  
 TATCTTGGAGGCGTAGCATAACGCTGGACAAGCGTTTTTTTTTTCGTGGGCAAACATTTATTTG  
 TCATGCAGATCTTCAAGAACGTGCTATCGTTCCTTGCTTCCATGAATATGTTTTTCAGGGGCCG  
 TTAACGCATGGTGGTCTATATTATTCTTTGCTTCAGATATGGTGCCCAAGTTTGAGAGAGGT  
 TGCTACGCCCTCTTGGCTACGGCAATATCAAGCGGAATTGTCTCGGTCGTCATACGCTCACT  
 ACAGATAAAAAGAGAATTTGTCTAAGAAACAGGTTCCCTTATATAGATGCTAATGACATGCCCG  
 GAGAAGATGACGATGACGACAACCAGGATAATGAAAATGATGGCGACGACGAGAGTATGGAA  
 GTTGAACCTCATAATGAGGAAATGGCCGAAATTTCAAATCCTTTCCGATAG

>YKL057C 0.8 Cold

ATGGCATGCCTCTCAAGAATTGATGCAAATTTGCTCCAATATTATGAAAAACCTGAACCCAA  
 TAATACGGTTGATTTATACGTCAGTAATAACAGTAATAATAACGGGCTGAAAGAAGGAGATA  
 AGTCCATCTCTACACCAGTTCCCTCAGCCTTACGGAAGTGAATATTCCAATGTTTTGTTATTG  
 AGTAACTCTGAGTATATCTGTTACCATTTTTTCCCTCAAGATCAACATTGTTGACATTTTATCC  
 TTTGAGTGACGCATACCATGGGAAGACAATTAATATAACACTTACCAAATGCTTCTATGAATC  
 AGAGATACACTTTAACGATACAAGAAGTGGAAACAGCAATTAAGTGGTTAATGTTATCTTAAAA  
 GATGGTTGTTTTTAAAGTTACAACACTACCCCTAAGTTTCCCTATTTTCATCGGCCAACACTCT  
 CAATGGAGAGTGGTTTTATCTCCAAAATCCCTACGACTTTACAGTTAGAGTTCCCTCATTTCC  
 TTTTCTATGTATCACCCAGTTCTCAGTTGTTTTTTTTGGAAGATGGCGGTTTTGTTGGGTTTA  
 AAAAAAGTTGACGGCGTACATTACGAGCCTTACTATTCAATGATAATTCATACTTGAAAAG  
 CCTAACGCGATTTTTTTCTAGGAGTTCTAAATCGGATTACGATAGTGTGATTAGTTGTAAT  
 TATCCATGAAAAGATACTTAATGTTGTTGACTCAGAATTGCCACTTGA AAAATTTGGGATTTA

ACTTCATTTACTTTAATACAAGATTATGATATGGTTTTACAGTCAGATTCAGACCCAAGCCA  
 TTTTAGAAAAGTGGAAAGCTGTAGGGGAATACCTTTCCTTGTATAACAATACTCTAGTTACAT  
 TGGTGCCTTTGGAAAATGGGCTTTTTTCAAATGGGCACCTTGTGGTTGATTC AAGCGGTATT  
 TTGACTTATACTTTTCAAATAACATCCCCACTAATCTTTCAGCTTCTGCTATTTGGTCAAT  
 TGTAGATTTAGTTCCTAACGAGACCATTGGAGTTGAATGTCGAGGCTAGTTATTTAAATTTGA  
 TCGTTTTATGGAAAAGTGGCACTGCTAGCAAGTTACAGATACTAAACGTAATGATGAAAGT  
 TTCAAAACTATGAATGGATAGAATCAGTTAACAAATCCTTAGTAGATTTGCAATCCGAACA  
 TGATTTGGATATCGTTACAAAGACTGGAGATGTTGAGAGGGGTTTCTGTAATTTGAAATCAA  
 GATATGGTACCCAAATTTTTGAACGTGCACAGCAAATATTGAGTGAAAAAAGATTATTTATG  
 GCTCATAACGAAGATGAAGAATATTTGGCTAATTTAGAAAACAATATTGAGAGACGTAAAAAC  
 CGCATTCAACGAGGCTTCTTCTATAACACTTTATGGCGATGAAATTATTCCTCGTCAATTGTT  
 TCCAACCGTATAATCATTCCCTTTACAAGCTGAATACTACTGTGGAGAAATGGTTTTTATAAT  
 ATGCACTCTGAAACTGATGGTTCTGAATTGTTCAAGTATTTAAGGACATTGAATGGTTTTGTC  
 TTCTACTTTGTCAAATGATGTTCTTAGATCCATTTCTAAGAAGTTTCTTGATATAATAACAG  
 GAGAGCTGCCTGATTTCTATGACTACCGTAGAAAAATTTACGGACATTTTCAAATAATGCCTA  
 GAAAAATCAATTTGAAATCACAATCTAAAGATTCTTTTTCGACGAATTAACCTCTTTTGATAT  
 ACCCGTTGTTTTAAATGATTTAATCAATAACCAAATGAAGCCTGGTATATTTTTGGAAAAAGG  
 ATTTTCATCTCTGCAATCAAATTCGATGGTTTCACAAGTATAATTTCCCTAGAATCTCTTCAC  
 CAGTTACTTTCCATACATTATCGTATTACTTTACAAGTATTGTTAACATTCGTTCTGTTCGA  
 TCTTGATACCGAAATTTTCGGACAGCATATATCTACATTATTGGATTTGCATTATAAGCAAT  
 TTTTATTGTTAAACCTTTATAGACAAGATAAGTGTCTGTTGGCGGAAGTTCTTCTCAAGGAT  
 TCTTCTGAATTTCTTTTCGGTGTCAAATTTTTTAACTACGGCCAACCTCATTTGCCTATATCGA  
 TTCCTTAAACTCTAATGTTTACAATGCTTCCATCACTGAAAATTTCTTTCTTTATGACGTTTT  
 TCCGCTCATATATCATTGAAAAACACATCTCATAAGAATATAAGGTTCTTTCTCGAGAACGTT  
 GAATGCCCTTCTACTTACGCCACAACGAGGTGCAAGAATTTATGTTTGCCATGACGTTATT  
 TAGTTGTGGTAATTTTCGATCAATCCTATGAAATTTTTTCAACTACACGATTATCCGGAGGCTA  
 TCAATGATAAATGCCGACATTTCTAGAAGACCTTAAGAGTGAAAACCTATCACGGTGATAGT  
 ATATGGAAAGATCTTTTTGTGCACCTTTACAGTTCCATATAGGCATTCTGCATTCTATTATCA  
 ATTATCTCTCTTATTTGATAGAAATAACAGCCAAGAATTTGCTTTGAAATGTATATCTAAGT  
 CAGCAGAATATTCATTAAGAAATTCAGATTGAAGAAGTCAAGACTTCAAAGAAAAACAG  
 CATATTCATTATTTAAATCTTTTAAATCCACTTCAGAATGTTTGAAGAAGTCTTGGATGTTTT  
 GAGATTGGGTCACGAGTGTCTTTCCGACACAGTAAGAACAATTTTTCTCCAATTATTATTAC  
 AGGAAGACATATATTCACGAGATTTTTTTCAGCACACTTCTGCGCTTGTGTAACGCACATTCA  
 GACAATGGCGAGCTATATCTTCGTACAGTAGATATTAATAAGTGGATAGTATTCTGTCCACA  
 AAATCTACGGAGTGGTGATTGGGAGTGTTTTAAAGAACTTTATTGTTTTAGAAATGTTGAACA  
 AAAGCGAGAGGGCTGCTGCAGAAGTACTGTACCAGTACATATTAATGCAAGCTGATCTTGAT  
 GTTATTCGAAAGAGAAAATGTTACCTAATGGTCATCAACGTTTTTATCTAGCTTTGATAGTGC  
 ATACGATCAATGGATTCTAAACGGAAGTAAAGTGGTTACTTTAACTGATTTAAGAGATGAGT  
 TACGAGGTCTATAG

>YDL194W 0.75 Cold

ATGGATCCTAATAGTAACAGTTCTAGCGAAACATTACGCCAAGAGAAAACAGGGTTTCCCTAGA  
 CAAAGCTCTTCAGAGGGTGAAGGGCATAGCACTGCGACGAAACAATAGTAACAAAGATCATA  
 CAACAGATGATACGACAGGTAGCATAACGACCCCTACGAGCTTGCAGCGGCAAAATCTGAC  
 AGGCAATCTAATATGACATCCGTGTTTACGGATGACATTTCTACCATAGACGACAACCTCAAT  
 TTTATTTTTCAGAGCCTCCTCAGAAACAATCTATGATGATGTCTATATGCGTAGGTGTTTTTG  
 TTGCAGTTGGCGGATTTTTATTTGGTTATGATACAGGTCTGATCAACAGTATTACATCTATG  
 AACTATGTGAAGTCACACGTAGCACCTAATCACGATTCATTTACCGCCCAACAATGTCCAT  
 TTTGGTGTCAATTTTGTCAATGGGAACTTTTTTTGGGGCTTTAACTGCACCATTTATATCTG  
 ATTCGTATGGCAGGAAGCCTACTATCATTTTTCAGTACAATTTTTCATCTCTCTATCGGAAAT  
 TCTTTACAGGTAGGTGCTGGAGGAATCACATTATTGATTGTGGGAAGGGTCATTTTCAGGTAT  
 CGGTATAGGCGCAATTTTCAGCGGTTGTTCCATTATACCAAGCAGAAGCTACACATAAATCAT  
 TAAGAGGTGCTATTTTCTACTTACCAATGGGCCATTACCTGGGGCTTGCTCGTGTCAAGT  
 GCAGTGTGCAAGGGACACACGCAAGAAACGACGCATCTTCGTATCGGATTTCCCATAGGGTT  
 GCAATATGTCTGGTGTCAATTTCTCGCTATCGGGATGTTCTTTCTCCCTGAGAGTCCACGCT  
 ATTACGTTTTTGAAGACAAGCTAGATGAAGCAGCTAAATCTTTATCGTTTTTAAAGAGGTGTA  
 CCAGTCCATGATTTCTGGGTTACTGGAAGAACTAGTTGAAATAAAGGCAACATATGATTACGA

GGCATCTTTTGGTTCCTTCGAACTTCATTGATTGTTTTATTTCAAGTAAAAGTAGACCAAAGC  
 AAACCTAAGGATGTTTTACGGGAATTGCCCTTCAAGCATTTCACAATTTTCAGGTATCAAC  
 TTTATATTTTACTACGGTGTCAATTTCTTCAATAAGACAGGAGTCAGTAATAGTTATCTGGT  
 TTCATTTATAACCTATGCTGTTAATGTTGTCTTTAATGTTCCCTGGTTTTGTTTTTTGTGGAAT  
 TTTTGGTAGACGTAAGGTGCTGGTTGTTGGGGGTGTTATCATGACTATAGCCAACTTTATT  
 GTGGCCATTGTTGGGTGTTCCCTTAAAGACTGTAGCGGCCGAAAAGTTATGATAGCATTTAT  
 ATGTCATTTCATAGCTGCCTTTTCTGCTACATGGGGTGGTGTGTTTGGGTTATTTTCAGCAG  
 AACTGTACCCATTGGGTGTGAGATCTAAATGTACGGCTATATGCGCTGCTGCTAACTGGCTT  
 GTAACCTTTATTTGTGCTTTAATTACCCCTTATATTGTAGATACTGGGTCGCATACATCATC  
 ATTAGGTGCAAAAATATTCTTCATTTGGGGCTCCTTAAATGCGATGGGGGTGATAGTTGTTT  
 ACTTGACCGTTTATGAAACGAAGGGTTTGACATTAGAAGAGATTGATGAATTATATATTAAG  
 TCATCCACTGGTGTCTGTCCACAAAATTTAATAAAGATATTAGGGAACGCGCACTTAAATT  
 CCAATACGATCCTTTGCAAAGATTAGAAGACGGAAAGAACAATTTTGTGCTAAAAGAAATA  
 ATTTTGACGATGAAACACCAAGAAATGATTTTCGAAATACGATATCGGGCGAAATAGATCAT  
 AGTCCCAATCAAAAAGAAGTTCATTCTATCCCAGAACGTGTTGATATTCTACTAGTACAGA  
 AATTCTTGAAAGCCCGAACAAAAGTAGTGGTATGACAGTCCCTGTGTCCACTTCTCTGCAAG  
 ACGTTCCAATCCCGCAAACAACAGAGCCTGCTGAAATTCGAACCAAATATGTGGACCTAGGA  
 AATGGGCTTGGTCTTAATACGTATAATAGAGGGCCTCCCTCACTCTCAAGCGACTCAAGCGA  
 AGATTACACAGAAGATGAAATAGGCGGGCCCTCATCTCAAGGCGACCAAAGTAATAGAAGTA  
 CTATGAATGATATTAATGATTATATGGCACGTCTCATTACAGTACTTCTACTGCAAGTAAC  
 ACGACAGATAAGTCTCCGGTAACCAAAGTACCCTTCGTTACCACACGGCTTCCCTCACATTC  
 GGATACAACCTGAAGAGGACAGCAATTTGATGGACCTGGGAAACGGGCTTGCCTTGAATGCTT  
 ATAACAGAGGTCCACCTTCAATTTTAAATGAATTCAGTGATGAAGAGGCAAATGGTGGTGAG  
 ACGTCTGATAATTTGAACACAGCTCAAGACTTGGCTGGTATGAAGGAACGAATGGCGCAGTT  
 TGCGCAGAGCTATATTGACAAGAGAGCGGCTGGAACCTGAAACTCAATCTAATATTTTGA  
 GCCTTCTCTCTCCGTGATGGCTGACACTAATGAACATAATAATGAAATCCTCCACTCAAGC  
 GAAGAAAACGCCACTAATCAACCTGTAAATGAAAATAATGATTTGAAATAA

>YNL229C 0.81 Cold

ATGATGAATAACAACGGCAACCAAGTGTGCAATCTCTCCAATGCGCTCCGTCAAGTAAACAT  
 AGGAAACAGGAACAGTAATACAACCACCGATCAAAGTAATATAAATTTTGAATTTTCAACAG  
 GTGTAATAATAATAATAATAACAATAGCAGTAGTAATAACAATAATGTTCAAAACAATAAC  
 AGCGGCCGCAATGGTAGCCAAAATAATGATAACGAGAATAATATCAAGAATACCTTAGAACA  
 ACATCGACAACAACAACAGGCATTTTTCGGATATGAGTCACGTGGAGTATTCCAGAATTACAA  
 AATTTTTTTCAAGAACAACCACTGGAGGGATATACCCTTTTCTCTCACAGTCTGCGCCTAAT  
 GGATTCAAAGTTGCTATAGTACTAAGTGAACCTTGGATTTTATTATAACACAATCTTCCTAGA  
 TTTCAATCTTGGCGAACATAGGGCCCCGAATTTGTGTCTGTGAACCTAATGCAAGAGTTC  
 CAGCTTTAATCGATCATGGTATGGACAACCTTGTCTATTTGGGAATCAGGGGCGATTTTATTA  
 CATTTGGTAAATAAATATTACAAAGAGACTGGTAATCCATTACTCTGGTCCGATGATTTAGC  
 TGACCAATCACAAATCAACGCATGGTTGTTCTTCCAAACGTCAGGGCATGCGCCAATGATTG  
 GACAAGCTTTACATTTTCCAGATACTTCCATTACAAAAGATAGCAAGTGTGTAGAAAAGATAT  
 ACGGATGAGGTTAGAAGAGTTTACGGTGTAGTGGAGATGGCCTTGGCTGAACGTAGAGAAGC  
 GCTGGTGATGGAATTAGACACGGAAAATGCGGCTGCATACTCAGCTGGTACAACACCAATGT  
 CACAAAGTCGTTCTTTGATTATCCCCTATGGCTTGTAGGAGATAAATTAACCTATAGCAGAT  
 TTGGCCTTTGTCCCATGGAATAATGTCGTGGATAGAATTGGCATTAAATATCAAATTTGAATT  
 TCCAGAAGTTTACAAATGGACGAAGCATATGATGAGAAGACCCGCGGTATCAAGGCATTCG  
 GTGGTGAATGA

>YNR073C 0.73 Cold

ATGACAAAATCAGACGAAACAACAGCTACCAGCTTGAATGCCAAAACCTCTAAAGAGTTTGA  
 ATCCACTCTTCCAATACCAACTTATCCAAGAGAAGGTGTTAAACAAGGTATTGTTTCATCTGG  
 GAGTCGGTGCATTCACCGTTCCTATTTAGCTGTTTTTTCATGCACCGTCTGATGCAGGAGCAC  
 CACTTAAAGGATTGGTCCATATGTGGTGTGGTTAATGAAAGCAGATGCACTTATGCGCGA  
 TGCCATGAAGGCCCAAGATTGCCATACACCCCTTGTGGAGCGTGGTATCAAGGACACTAACG  
 CTTATATCGTTCGGTCTTACTGCTTACATGTACGCTCCCGATGATCCAAGAGCTGTTATT  
 GAAAAGATGGCCAATCCAGACACACATTGTTTCTTTGACGGTCACAGAAAACGGTTACTA  
 CCACAGTGAAGCAACAACCTCCTTAATGACAGATGCTCCCGAGATTATCAATGATTTGAACC

ACCCAGAAAAGCCAGATACTCTGTATGGGTATCTATATGAGGCCCTGTTGTTGCGTTACAAG  
 AGAGGTCTTACCCCATTCACTATTATGTCATGTGACAACATGCCCCAAAATGGTGTACAGT  
 AAAGACCATGCTTGTTCATTTGCCAAGTTAAAGAAGGATGAGAAATTCGCCGCCTGGATTG  
 AAGACAAGGTTACTTCTCCTAACAGCATGGTGGACCGTGTGACCCACGTTGTACCGATAAA  
 GAGCGTAAATACGTTGCTGACACCTGGGGAATCAAGGATCAATGTCCCGTTGTTCGAGAACC  
 TTTTCATCCAATGGGTTCTTGAAGACAACCTTCTCCGATGGCCGTCCTCCATGGGAACTTGTG  
 GTGTTTCAGGTCGTCAGGATGTCGATTCTACGAATTGATGAAGTTGCGTCTACTTAACGGT  
 GGACATTCTGCTATGGGATATTTGGGATACTTGGCAGGCTACACCTATATACATGAGGTTGT  
 CAACGACCCAACTATCAACAAGTATATCCGTGTTTTGATGCGTGAGGAAGTTATCCCATTAT  
 TGCTAAAGTGCCAGGTGTTGATTTTGAAGAGTACACTGCATCAGTGTGGAAAGATTCTCC  
 AATCCAGCTATTCAGGACACTGTCGCACGATTTTGTGTTGATGGGCTCTGGTAAGATGCCATA  
 GTATGTTTTGCCATCAATTTACGAGCAATTGCGTAAACCAGATGGTAAGTACAAGTTATTGG  
 CAGTATGTGTTGCTGGCTGGTTCGGTTACCTGACTGGTGTAGACATGAATGGGAAGCCATTC  
 GAAATCGAGGATCCTATGGCACCAACCTTGAAGGCAGCCGAGTTAAGGGTGGTAAAGATCC  
 TCACGAACTGCTCAACATTGAGGTGCTTTTTCAGTCCTGAGATTCTGTACAACAAAGAAATTCG  
 TTGCACAGTTGACCCACTCCCTAGAAACAGTTTATGATAAAGGGCCAATTGCCGCTATTAAG  
 GAAATTTTAGACCAAGTGTGA

>YLR264W 0.79 Cold

ATGGATTCTAAGACCCAGTCACCTTAGCTAAAGTCATCAAAGTTTTAGGCCGTACCGGTTTC  
 TCGTGGTGGTGTACCCAAGTTCGTGTTGAGTTCTTGGAAAGACACTTCCCGTACCATTGTCA  
 GAAATGTCAAGGGTCCAGTTAGAGAAAACGACATTTTTGGTCTTGATGGAATCTGAACGTGAA  
 GCTCGTTCGTTTTGCGTTAA

>YGR006W 0.77 Cold

ATGGACCTAGATCTAGCCAGTATCTTAAAAGGTGAAATTTCTAAGAAGAAGAAAGAGCTGGC  
 CAACTCTAAAGGTGTTTCAGCCACCATGCACTGAGAAATTCAGCCACATGAATCCGCAAACA  
 TAGACGAAACACCGCGACAGGTAGAACAAGAAAGTACAGATGAAGAAAACCTGTCAGACAAT  
 CAGAGTGACGATATTAGGACCACCATTAGCAAATTAGAAAATCGGCCAGAAAGGATACAAGA  
 AGCGATAGCTCAAGACAAAACCATCTCTGTAATCATTGATCCATCACAAATTTGGTTCTACTG  
 AAGGAAAACCTCTTTTTGTCAATGAAATGTAATTTATATATTACGAAAATATTATCTCGTTGG  
 AAGGCGTCTTTGGAAGCTTATCATCCGGAGCTGTTCTTAGACACTAAAAAAGCACTCTTTCC  
 ACTCCTACTGCAACTACGAAGGAACCAGCTTGCCCCGGATTACTTATTTCCCTTGCGACCG  
 TTCTCTATCATTTACAACAACCTAAAGAAATAAATTTAGCCGTTAGTCCTATATGAAACTC  
 AGTATCGGCAATGTGGCCTGGCCTATTGGTGTACTAGCGTAGGCATTCATGCTCGTAGTGC  
 ACATTCGAAAATTCGAAGGAGCCGGAATGCTGCTAACATAATGATTGATGAAAGAACGCGAT  
 TATGATTACCAGTATTTAAAAGATTAATAACTTTTTGAAGAATGGTATACCAGCAACCACGAT  
 AGCTTAGCCTAA

>YLR252W 0.8 Cold

ATGTCGTTGCAATATTTTTGGAACACTTACTTATCTTATAAAAACCTCAAAGGTTATGGAGAAA  
 GACAAGGTACCTGTTTATTATCCACCCGTGGTTCGAATAACTGGATAAGAAATCCTGATTTTG  
 AAAATATTTGGAATTCAACTAGCATATTTATCAGACCTTGTTCCTTGGGGTACTGGAACAGC  
 ATATACCTAATAGACTTTTCGGCAGAGAGCAGACCAACTTCATAAATATTTGAGTCACCAAAG  
 TTGGCTAGCAATCTGCTTTTCTTTACAGATGTGCTTGGTCAGGAACAATTTATTTAA

>YDR468C 0.72 Cold

ATGAACAACAGTGAAGATCCGTTTCAACAAGTTGTTAAGGACACCAAGGAGCAATTGAACCG  
 CATAAACAATTACATAAECTCGTCACAATACTGCTGGTGTGACGATCAAGAGGAGGAAATAC  
 AAGATATTTTAAAGGATGTTGAGGAAACAATAGTTGATTTGGACAGAAGCATAATCGTAATG  
 AAAAGGGATGAAAACGAAGACGTGAGTGGTAGGGAAGCACAAGTTAAAAATATAAAACAGCA  
 ACTTGATGCTCTGAAGTTGCGTTTTGATCGAAGAATACAGGAATCTACTCAAACAACCTATTC  
 CTCTAGAAGAGACGGTGGAAAAATCAACACTTAACACCAGCATGGCTGAGAACAATGATGGT  
 GGTATGTCCAATCCGTTTCAGGAACAAATGTTAAGAGAACAAGATGTTTATTAGATGGTAT  
 TCACAAGACAATGCAAAATTTGCATATTCAGCTCAAACAATGGGGGATGAATTAGAGAACC  
 AGGGACAATTGTTGGATAATATGGACGAGGGTATGGACGGTGTGTAATAAGCTGGCTAGA

GGTCGTAGGCAATTGGAATGGGTCTACGAAAAAATAAAGAAAAATACGACGATTGTTGTAT  
 AGGACTTCTTATTGTCGTCTTGATAGTTTTATTAGTTTTGGCATTTCATTGCTTGA

>YOR023C 0.75 Cold

ATGATGAGTCCC GCCAAGATAAACTGCAGCACCAGCATCATAATCCTAATTCTTCCTCATC  
 GTCATCCTCTAAGATGACGAACGTTTTATCAGGTTACCACGCCAAAGTCTCCTCAGGATTTGG  
 AAAACAACATGGATGAGCCCTTCAAATGGACACCGCCACCAGTAATCCGGACAAGGATAGC  
 GAAAATACCCAGCGGTTGAAGTACGAATGTGCCAAAGGGGAAATACAGAATGTTTTGAACCT  
 ACATATAATGCTAAACCACAAGCATGTTAGGCACCTACGAAGAAATGTTCAAAGGTTAACG  
 CAAAAGTAGCTCTCTTGAAACCCTGCATAAGGATACTGGTCTATTGAACAAAATCGAACGG  
 ACGTATCAACTCAAATAAAAACAACATCAGCAGCATAGCGTGCTCGGCGGCCACTTTCACGA  
 CAGTACGGCTACGGAAAATACGAACGCATCAAATTATAACCTGTCATAACCGGTTCTATCGG  
 ATTATAACATCAACTGTCAGCCTTTGTCTTCGAGCAGCAACAGAAATCTGTCAACAACACGC  
 ATACCACACCACCATTTATCATACTAGAAGCAAGAGTAACGGGCTTTTGCTAGAACCCTTCTGC  
 CCTCCGTCCGGCAAATTCGAATATAATTGATTACAGGCTAACAGGTTCTAAATCTCTATCAG  
 AAGCCATAACCAAGCCCACTCCCCTCTCGCTTCTCCTACTCTAATTCGGATGGCATTCTTCA  
 CCTCGTTCCCTCCTCAATCTCCCCCTTAGACGAGCAGCCGGGGTTCCAGATACTCCCTTTTAA  
 ACCAAGTCAGATGCATCTTAACCACAGACGTAATTACAGTAGCACTTGTGTTGACGAGCAATA  
 GCGGTATCATCGGTAAGACTGAAAATAATGAGCCATTTTTTAGAAGATATGACGGCATTTTG  
 GTTATAATTACGTGCTCCAAATGTGACCGTTCCGGTTTCACTTCCGCGCAAGGTATCGTGAA  
 CCATACTCGACTAAAACATTTCTAAACTATATTCAAGCCAACCATTGGCAGTTTTAAACAACC  
 AAAAAGTAGTCTTAATGATAAGCAGGATCCGGAAATTTTTATCTAAGTTCAAGAACTAAAT  
 TTGGACCCAAAACAAGACTACCTACCCTCTGACATTGCAATCCCAAAACCACAATCACCAAT  
 CAACCACTCCGAGAACCATAACGCGGGCTCCAAAGACTGTCAAGAACACTCCTCATTTAGAAA  
 AACTATAACAAAAATAAGAAAGACTTCAAAAAACTGATTGACATGGTTAATGAAACTCCGGAT  
 GATTTGAATGAATATTTGAAGCAACGTGAAATTC AATTAAGATATCAAAGGAGCAAGAAGA  
 GGAATCTTCCAAATCTGATGACGAAGCTTCTTACGTCCCATCACCGTCTCTCTCAGCAACGG  
 CTACAACAACAACGACTACGGACCCACCCTCTCCGCCAGTGCTATCCTCCTCCTTACAAAGA  
 AAATTGCTGCGTAAGAGAAAAGTGAAGCTTGAATAGCTCTACTCCCATGGAAGATTTACCTTT  
 AAGAGAAAGGTTGAGAGCAAATCCCACTGACAAGAAACCAAGAAAAGCGGCCCTTTTGACTA  
 ATGAACTTGAGGGTCTGATCCTGCAGCAAAATCATCATCTTATTACAATCTAAGGTCGAAA  
 TCAAGACTGCGTGGTTCTCATACATAG

>YDR304C 0.8Cold

ATGAAGCTTCAATTTTTTTTCCCTTATTACCTTATTTGCTTGTCTCTTCACAACAGCCATTTT  
 TGCGAAAGAGGACACGGCAGAAGATCCTGAGATCACACACAAGGTCTACTTTGACATTAATC  
 ACGGTGATAAAACAAATTTGGTAGAATTGTTATGGGATTGTATGGTCTCACACACCCCCAACCC  
 GTTGAAGAACTTTTACCAGTTGACCATTTCCAGGGACCCTAAGATGGGTTATTTGAACTCTAT  
 CTTCCATCGCGTTATTCCTAACTTCATGATTCAAGGTGGCGATTTCACTCACAGATCAGGTA  
 TTGGGGGTAAGTCTATCTTCGGAAACACGTTCAAAGATGAGAATTTTGATGTCAAACATGAC  
 AAACCAGGCAGATTGTCTATGGCCAATCGTGGTAAAAACACCAACGGATCCCAATTTTTTCAT  
 CACCACCGTCCCATGCCCATGGTTGGACGGTAAGCACGTTGTCTTTGGAGAAGTCTTGGATG  
 GTATGGACGTAGTTCACTACATTGAAAACGTTAAGACCGACAGTAGAAATATGCCTGTAAAG  
 GAAGTTATTATTGTGGAAAGTGGTGAAGTGGAAACTGTTCCCTTTGGACAATAAAGACGCCGC  
 CAAGCTACAGGAAGAGATCAAAGCGGAAGCTAGCGAAGCAGCCCACGATGAACTCTAA

>YER061C 0.73 Cold

ATGTCAAGAAGAGTGGTTATCACAGGATTGGGCTGTGTAACGCCGTTGGGAAGATCATTAAG  
 TGAGTCATGGGGGAATCTGCTCTCTTCCAAAAATGGACTCACACCAATCACATCTTTGCCCA  
 ACTATAATGAGGACTACAACTCAGAGAAAAAAGTATCCCATCAACGATAACAGTGGGGGAAAG  
 ATTCCAGAGAATTTTCAAACGAAAATTCAGCCATCAATAAACTGCTGTCTACTAGCCAGGA  
 TGAGAGAAGAACCCTCAAGCTTTATCAAGCTAGCACTACGTACAACCTTATGAAGCGCTTACA  
 ATGCTGGTCTCTTGAACCCAAATGATATAACCATCAATACATCTCTGTGCAATCTGGATCAC  
 TTTGGTTGCCTGATAGGTTCTGGTATAGGATCCATTCAAGACATATAACCAACTTCTCTACA  
 ATTCCATAACGACAATAAAGAATAAATCCATATTTTCGTCCCTAAAATCCTTACAAATATGG  
 CAGCTGGTAATGTTCCATCAAGTTTAACTTAGAGGATTATCCCATAGTGTTCACACAGCA  
 TGCGCAACAGGTAATAACTCCATTGGCGATGCATTC AATTTTATTCCGGTTAGGCATGCAAGA



CATCTGTGTCGCCGGTGCAAGTGAAACGAGTTTGCATCCGTTAAGTTTAGCAGGTTTCATCA  
 GAGCAAAGTTCGATTACTACAAACGGGATCTCTAGACCCTTTGATACACAACGTTCTGGATT  
 GTACTTGGTGAAGGATGCGGAATGATTGTCATGGAATCGCTAGAACATGCTCAAAAGAGAAA  
 TGCAAACATAATTTCTGAGCTCGTGGGCTATGGTTTAAAGCAGTGATGCCTGCCATATTACCT  
 CCCCTCCTGCTGATGGAAATGGTGCCAAAAGAGCAATAGAGATGGCTCTAAAAATGGCTAGA  
 TTAGAACCAACTGATGTTGACTACGTCAATGCACATGCTACATCAACTTTACTAGGCGATAA  
 AGCAGAGTGTCTGGCAGTAGCCTCAGCACTCTTACCAGGAAGATCCAAAAGCAAGCCACTGT  
 ACATATCCAGTAACAAAGGTGCAATTGGCCATCTTTTAGGTGCACGTGGCGCCGTAGAAAGT  
 ATATTTACAATTTGTTTCCTTGAAGGATGATAAGATGCCGCATACCTTAAACCTGGACAATGT  
 TCTGACTCTAGAAAATAACGAGGCCGATAAGCTACATTTTATAAGAGACAAACCTATTGTGG  
 GAGCTAATCCGAAGTACGCATTATGCAACAGCTTCGGATTTGGAGGAGTTAACACATCTCTT  
 CTCTTCAAGAAATGGGAAGGGAGTTAA

>YGL142C 0.73 Cold

ATGGCTCACGAGGTTTCATAGAATAAAACCTAAACTAGGACGGACCCAAAATATTTTGGGTTTT  
 TCTAGCCTTTAGAGTACTGAATGCAGTTCTGACGAGAACCCTTCTTTAGGCTGATGAGTTTT  
 GGCAAGCATTGGAGCCGGCACATTGGAAGGCTTTCAAGTATGGTGAAGTACTTGGGAATGG  
 AAATTCGGAGTTCGTAGCTATTTATTTCCGATGATTTTTGAGCTGACTTATAGATTGGTTTT  
 TCTATCGTCAATCCTTCTTCACTATGCACTTCTTCTTCTCAACGATAGGGTCTGATTTAT  
 TAATTTTACTACTGCCGAAATATGAGTTAAGTTGGCAAGTCGCTGAAGACTTGAAGAGGCTT  
 CCTTTTGATGTCACACGGTTCGTTTCAATATTTATGGTGTGATATATGCGCCAAAATAGTTAT  
 GGCAGTACTAGCTTCCATAGGGGAATATTATATCGTAAGATTTGTTCAAAAGCTCTATTTAC  
 TTACACTTGATAAGAGAAACGAGAAGGAGGAAGAGGAGAGACGCAGCGGTTTATCCGAGATT  
 ACGAAGTTTGCCTGTTTTAAGTTTAACTAATTTTTTTAATTGCTTTTTTTATTACAAGAAC  
 GTTCATCAACTCTTTTGAATGATTTTAACTTCTATTGCCCTCTACTACTGGGACTGGACAG  
 GCGGACAAATGATAAAAGAGTCATCTTTTACTAAGTCGCTTATTTTTGCATTTCTGGCATGT  
 TTGCAAAGACCCAGCAGTGGACTTATTTGGGTAATCCCAGCATTTCCTAATATTTAACTT  
 GGTAGGCAAAAAGCAGTATCATTTACTTTTTCATCACATTTTCCAAAGTTTACGGTCTTTTT  
 TTCTGGTATTTACTGCAATGCAATTATCGACATGTATTTTTATGAAAAAGTAACGTTTCCC  
 TTTTTCCGATTTCTAAAATTCATTTTCAACACCATTATCAAAGTTTTATGGGGTAGCTCC  
 TTGGCATTTTTCATTTCTTTCAAAGCTTACCTATCGTATTAGGTGCAAGTATCCCCTTTTG  
 CATTTGGATTATTTTTTCCACTAAGCAAAAGGAGTTTCCCAAAGAAGTATTTAAACCCGTTT  
 TTCCAAGTGAACCTCACTATCTTGTGTAATCTGTTGGTGTACTCTACGTTACCTCATAAGGA  
 ATTTAGGTTTCATTTCCATTACAGCCACTTTTCATATTAATATCATCATTTGGCCTTTTGA  
 GACTTGATAGAGATTATTGGAAAAGACTATCTGGCCTAAAATCTTTACTCTGGCTTGTCCA  
 TTCGTGTCGGTGTTCATCGCATTACTTTTGGACACATTCCACGAATCTGGATCTATCGAAGT  
 TATGAAATTTTTTACATGAAGAGCCAGAAATAGATAGTTTGGGATTCATAATGCCCTGTCATT  
 CGACACCTGGTCAAAGCTATTTACACCGCAGTGACATTCAAGATCTGTGGTTCGATTACTTGT  
 AACCTCCATTGCATTTACTTGGAGACCCAGAGGCTTACTCCAAACTAGAGACCTACATGGA  
 TGAAAGTGACCATTTGTATGACGATATATCGGCATTCATTTACAAAAATTTCCACCGCCTT  
 TTCGTAAGGATCTAAGGAGTCCAGGTAACACATACAGCCACGAATGGCCAACATATTTGGTT  
 GTTTTCGAGCACATGGAAAACGCATTTCTAAAGGATTTCTGAAAGATTCATCATAACATGA  
 ATACAATAGATTTCTCAACTCTCTTGCACACTGGGATTCAGAAGATCAGGAGACATAATAA  
 TTTATTATAAATTACCATTTCGATTATAGCGATATTCAGCGGCAGATATTTAA

>YNR070W 0.66 Cold

ATGGAATGCGTTTTCAGTAGAAGGTTTGGATTCTTCTTTTTTGGAGGGCCAAACCTTTGGCGA  
 TATTTTGTGTTTACCATGGACAATTATCAAGGGTATCCGTGAGCGGAAGAATCGCAATAAGA  
 TGAAGATCATTTTGAAGAATGTCAGTTTGTGCTAAATCAGGAGAGATGGTCTTTGTCCTA  
 GGAAGACCAGGCGCTGGCTGTACATCATTTTTAAAGAGCGCTGCTGGTGGAGACCAGTCAGTT  
 TGCAGGTGGTGTAAACAACAGGACATATATCGTACGATGGTATCCCTCAGAAAGAAATGATGC  
 AACATTACAAGCCAGATGTAATCTATAATGGTGGAGCAAGATGTTTCAATTTCCACATTTGACA  
 GTAAAACAAACTCTAGATTTTGCATTTTCTGTAAAGATGCCCGCAAAAAGAGTCAATAATGT  
 AACGAAAGAAGAGTATATTACTGCCAATAGAGAATTCTATGCTAAAATTTTTGGTTTTGACGC  
 ATACTTTTCGATACCAAAGTTGGTAACGATTTTCATCAGCGGTGTATCTGGAGGTGAGCGTAAA  
 CGCGTTTCCATTGCTGAAGCATTAGCAGCGAAAGGTTCAATTTACTGCTGGGATAATGCTAC  
 AAGAGGTCTTACTCTTCTACCGCGCTAGAAATTTGCACGAGCTATTCGTACTATGACAAATC

TGTTAGGTACAACGGCCCTTGTTACGGTTTACCAAGCCAGTGAAAACATTTATGAAACTTTT  
 GATAAAGTCACTGTTCTATACGCTGGAAGACAAATATTTTGGCGGCAAAACTACTGAAGCAAA  
 AGATTATTTTAAAACATGGGTACTTGTGTCCACCGAGACAATCGACTGCTGAATATTTGA  
 CCGCAATTACTGATCCTAATGGTCTGCACGAAATAAAGCCTGGCTTTGAGTATCAAGTACCT  
 CATAACCGCTGATGAATTCGAAAAATACTGGCTTGATTCCCAGAATATGCCCGCCTAAAAGG  
 TGAAATTCAGAAGTACAAACATGAAGTGAATACTGAATGGACCAAAAAACATAACAATGAGT  
 CTATGGCACAAGAAAAGTCGAAAGGTACAAGAAAAAATCTTATTATACGGTCTCTTATTGG  
 GAGCAAATTAGACTTTGCACTATTAGAGGTTTCCTAAGGATTTACGGTGATAAGTCATACAC  
 CGTTATCAACACATGCGCTGCTATAGCACAGGCTTTTATCACTGGGTCAATTGTTCTACCAAG  
 CACCTTCTTCAACTCTAGGGGCCTTTTCTAGAAGTGGCGTCTGTTTTTTTCCCTCTTATAT  
 TATCTTTGATGGGTTTAGCTAATATTAGTTTCGAGCACAGGCCAATATTGCAAAAAACAAA  
 GGTCTATTCACTATATCATCCCTCAGCTGAAGCGTTAGCAAGTACGATTTCTTCTTTTCCAT  
 TCAGAATGATTGGTCTAACATTTTTTATAATCATCCTGTACTTCTTAGCCGGTTTGCATAGA  
 AGCGCCGGTGCTTTTTTTACTATGTATTTGTTATTGACAATGTGTTTCAGAAGCTATTACAAG  
 TTTGTTTCAGATGGTTTCATCTTTATGCGATACATTGTCCCAGGCCAACTCCATTGCCGGTG  
 TTGTGATGTTATCTATTGCCATGTATTGACGTACATGATACAATTACCTTCAATGCATCCA  
 TGGTTTAAAGTGGATTTTCGTACATTTCTACCCATTAGATATGCATTTGAATCGATGTTAAATGC  
 AGAATTTTCATGGAAGACATATGGATTGTGGTGGCACTTTGGTTCCTTCTGGACCTGGGTTTG  
 AAAACATCTTGGCAGAAAATCAAGTGTGTGCTTTTTGTTGGTTCAAGGCCTGGCCAATCTTGG  
 GTCCTAGGTGATGATTATTTGAGGGCCCAATATCAATATGAGTACAAAAATACTTGGAGAAA  
 CTTCCGGCATCATGTGGTGTTCCTTAATTGGCTACATCGTCTTGAGGGCGGTTTTTCACTGAGT  
 AAAAAAGTCTGTCAAAGTGGTGGTGTGCTCTGGTTCGTCAGAAGGGCACAAGAAATGCT  
 ATACAAAGATCATGGAGCAGCAAAAATGACGAAGAGAACCCTTAATGCCTCTATAGCAACACA  
 GGATATGAAAGAGATAGCTTCAAGTAACGACGATAGCACAAAGTGCAGACTTTGAAGGTTTGG  
 AATCTACCGGGGTGTTTTATTTGAAAAATGTTTCTTTTACAATTCCTCATTTCTAGCGGACAA  
 CGTAAACTTCTGGACAGCGTAAGCGGTTACTGTGTTTCTGTTACTTTTGGAGCATTAAATAGG  
 TGAGTCCGGCGCTGGTAAGACCACATTATTAACACTTTTGGCTCAAAGGAACGTGGGAACGA  
 TTAGTGGTGTATGTTAGTTGATGGTCTCCCAATGGACGCTAGTTTTCAAAGGGGTACCGGT  
 TATGTTCAACAGCAAGATCTTCATGTTGCTGAACCTTACTGTCAAAGAATCGTACAATTTAG  
 TGCTCGTATGCGTCGGCCACAGTCTATTCTGACGCTGAAAAGATGGAATATGTTGAAAAAA  
 TTATATCTATTCTTGAAATGCAGGAGTTCTCAGAAGCTCTTGTGCGGCGAAATTTGGTTACGGC  
 TTGAATGTTGAACAGAGAAAGAACTATCAATTTGGCGTTGAGCTAGTTGGCAAGCCGGATCT  
 GTTATTGTTTTTTGACGAACCGACCTCTGGCTTGGATTCCCAATCCGCGTGGGCGTCTGTC  
 AAATGTTAAAAAGATTAGCTCTAGCAGGTCAATCAATTTTATGTACTATTATCAACCATCA  
 GCTACTCTTTTTTGAACAGTTTGACAGATTATTGCTTTTTGGGAAAAGGCGTCAAACAATTTA  
 TTTTGGTGAATAGGTAAAAATCAAGTTCTGTCAATTAAGTATTTTCAAAGAACGGAGCCA  
 GGAAATGTCAACAAAATGAAAATCCGGCAGAGTATATTTTAGAAGCCATAGGAGCTGGGGCC  
 ACCGCTTCTGTTCAACAGAAGTGGCCTGATATATGGCAAAAATCTCACGAGTATGCAACAT  
 TAACGAAAAAATAAATGACATGATTAAGGACTTATCTTCTACAACCTTGCATAAAACAGCTA  
 CAAGGGCTCTAAGTATGCAACATCGTATTCTTACCAATTCATCATGTGCTGAAAAGATCC  
 AGTTTAAACATTTTGGAGAAACTGAACTACATCGCCAAAATGATGTTATTGATGATCAG  
 TGGCTTGTTCAATGGTTTTTACCTTTTTTCCATGTGGGTGTAATGCTATTGGATTACAAAATA  
 GCTTATTTGCCTGTTTCATGGCTATCGTTATATCAGCTCCTGCAACAAACCAATAACAGGAG  
 CGTGCTACCGTTGCTAAGGAGCTATATGAAGTTTCGTGAGTCCAATCTAATATGTTTCATTG  
 GTCTTTACTTTTTGATTACCCATTATTTAAATGAATTGCCTTACCATTTATTGTTTTCAACAA  
 TTTTTTTCGTTTCATCATATTTCCCTCTGGGTGTCTTTACCGAAGCCTCTAGGTCAAGTGT  
 TTTTATCTGAACTATGCCATACTTTTTCAACTTTACTATATTGGTCTTGCCTTAAATGATTCT  
 GTACATGTCTCAAATCTACAATCTGCCAATGTTATTGTAGGTTTTATACTTTTCGTTTTTGC  
 TCTCTTCTGCGGTGCTGTCCAACCTGCCTCTTTAATGCCTGGTTTTCTGGACATTCATGTGG  
 AAATATCCCTTACACGTATTTTTTGAAAAATTTAGTTGGATTATTGATGCATGACAAACC  
 CGTAAGATGTTCAAAGAAAGAGTTGTCTCTTTTCAACCCCGGTAGGCCAAACATGTGGTG  
 AATTTACCAAACCGTTTTTTGAATTTGGGACTGGGTATATTGCAATCCAGATGCAACAGCA  
 GATTGCGCCTATTGTCTAGTACAAAGTAGGTGATGAATACTTGGCGCGCATAAATGCTAGCTT  
 TAGTTACTTATGGAGAACTTCGGTTTTCAATTTAG

>YHR168W 0.82 Cold

ATGTCGATAGCTTGGTCTAGCGTTTTTCAAAGAGAATTACGGCTTGAAAGATTTTTTACCAAG  
 AGTATATTCGACGAAAGTTCCTGATAATGCACCAAGAGCGGCTGACAATGAACAATGGCTAG  
 AAACCCTAAGACCTATAACTCACCCAGAACAGAAAAAGTCCGACCATGATGTCAGTTACACA  
 AGACACATTAATGTTCTCTGGGCGAAGTCACTTCTGTCAACTATCTACAACGGTATAATAA  
 GCATAAGCATAGCCAGGGCAATTTCTGTGGATGTTTCAAGTAGTAAATGCAAAAGTGGCGCTG  
 GTGGAAGTGGAGCTGTCTCCTTCTTTAGGGATGCAGGGAGGTCTATAGGTCCTCCGGATGGT  
 GGAGATGGGGGAGCTGGTGGTAGTGTTTATATTCAGCTGTTGCGGGGTGGGATCTCTGGC  
 GAAGATGAAGACCACATATAACCGCTGAAGACGGAGAAGCAGGTGCTGCCAGGCAACTGGATG  
 GCATGCGAGGAAGAGATGTTTAAATACAAGTTCCTGTGGGTACTGTTGTAATAATGGTGCCTA  
 CCACCCAAAAAGTTCGAGAGCTCGTGGAAAGAGAAATGCGCAAAGACAATAATGCTACATT  
 AAGGTCTATACTGGCTCAACAGCCGTCAACTTAAAGCGTTTCTTCTGGTCTCATCGGAAAA  
 AAATACAACTATACAGACATGAAATGGCGGAGAGTTGGCTCTTCAAGGACAAGGCCAAGGAA  
 TACCATGAGAATAAGGACTGGTTCAAAGATTTACATAAGAAAATGGAGGCATACGACCACTC  
 GTTAGAACAACTGAACTGTTAATGATCAGTTTCCACTGGCTGGTCTTGACTTAAATCAGC  
 CAATGACGAAACCAGTATGTCTGCTGAAAGGTGGCCAAGGTGGACTCGGTAACATGCACTTT  
 TTAACAAATTTGATTAGAAATCCAAGATTTTCCAACCCGGCAGGAATGGGTGGAAACAGCA  
 TTTTTTATTTCGAATTGAAAAGCATTGCTGATCTTGGACTCATTGGTTTTGCCTAACGCTGGAA  
 AATCAACTATACTAAACAAAATCTCAAATGCAAAACCGAAAATAGGGCACTGGCAATTCACC  
 ACCTGAGCCCTACGATTGGCACAGTTTCTTGGGTTTTGGGCAAGACGTCTTCACTGTGGC  
 CGATATACCTGGAATAATACAGGGAGCATCATTAGACAAAAGGGATGGGTCTTGAGTTCTAA  
 GGCATATAGAACGTTCCAATGGTTGGGTATTTGTCTTGGACTCTCTAATAAAAAACCTTTG  
 AATGACTTACAATTACTGATAGAGGAAGTTGGTACTTTAGAGAAAGTCAAGACCAAAAAACAT  
 ACTAATTGTATGTAATAAAGTCGATATTGATGCCGAGAAAATCCGAATCATTTGCCAAGTACC  
 TACAGGTTGAGAAAATTTTCCAAGGTCAGGAATGGGACTGTGTTCCGATAAGCGCCCTCAGA  
 GAGAAAACATAG

>YOR124C 0.78 Cold

ATGCCGAACGAAGATAATGAACTTCAAAAAGCAATTGAGAACCATCATAATCAACTACTAAA  
 CCAGGATAAAGAAAATGCTGACAGAAATGGGTCTGTTATAGAAGACCTCCCATTTATACGGGA  
 CAAGTATAAACCAGCAGTCTACCCCTGGAGATGTTGACGATGGAAAACACTTACTGTATCCA  
 GATATTGCCACCAACCTACCACTGAAGACTTCTGACAGACTTTTTGGACGATATACTTTGCGA  
 TACTATTTTTCTCAATTTCTACAGACCCGAAGTTCATGCAAAAGGGCCTGCAATCGAGGGGTA  
 TTTTAAAAGAGTCTATGCTTTCTTACTCAACTTTTTCAGAAGTAGTATTCGCCCTAACTGCTTG  
 GGTTCAATTAAGTATCAAGTGGTTTTTTCAAACAAAATCCGAGTATGATTCATTTTCATGCC  
 AAAATATAATAAATAACATGTATTTTCAAGCGGTTCATCTTTAATCCATCACTGGCAGAACAGC  
 AAATTTCAACTTTTTGATGATATTGTTAAAATTCCTATTTATCATCTTAAGGTTAGCGTAAAA  
 GTCGCCAAGAAGTGGAGCGGTGGAAGAAGCATGTCCGGTGTACTCAATTCCACTCACTAGA  
 TCATTTGCACGAATACGATCGAGTAGACCTTTTCGACTTTTGTATTCTTCCGATCCTAATTTGT  
 TGGATTACGGTATTTACGTTTCTGATGATACTAACAACTGATCTTGATTGAAATTTTTAAA  
 CCCGAGTTTAAATTCACCTGAAGAGCATGAGAGTTTTTACTGCCGACGCAATTAAGAAGAGATA  
 CAATGCTATGTGTGTAATAAATGAATCACTAGATAAAAAGCGAGACGCCATCTCAAGTTGACT  
 GTTTTTACACACTTTTTAAAAATTTTTAAAGGGCCTTTGACGAGGAAAAGTAAAGCGGAACCT  
 ACAAGACAATTGATTCTGGAAATTTGGCCCTTAACACTCACCTGAATCCTGAATGGTTAAC  
 GTCCAAGTATGGATTTCAAGCAAGCTCAGAAATCGATGAGGAAACTAATGAGATATTTACTG  
 AATACGTCCCTCCAGATATGGTGGACTATGTAAACGATTTGGAGACAAGAAAAATTCGAGAA  
 TCGTTTTGTGAGGAAGTGTTTACAACCTGATATTTTGGGGTCAACTATCTACCTCATTACTGGC  
 ACCTAATTTCTCCCTTGAAAAATACGAAAAGCGTAAAGGGAATGTCTTCAATTACAACTTCTT  
 TCTCAACACTACCTTGGTTCCATTTATTGGGAGAATCCAGAGCAAGGATTTCTATTAATTTCC  
 AATGAGCAAACCTCATTGCCTTTGGACGCAGAACCTCATTTTATTAATCTTTCCGTTTCGCA  
 TTATTATACCGATAGAGATATAATCAGAAACTACGAATCTTTGTCTTCTTTGGATCCTGAAA  
 ATATTGGGCTGTATTTTGCAGCACTGACATACATTGCAAAATAGGAAGGGGGCATATCAATTG  
 ATTGCTTACTGTGGAAAACAGGACATTATAGGCCAAGAAGCTCTAGAAAATGCTTTGTAAAT  
 GTTTAAAATTAACCCTAAAGAGTGTAAACATCTCCGAATTAATGAGGCGACTTTGCTATCTA  
 TTTACAAATATGAAACATCAAAATAAGAGCCAAGTAACCTCTAATCACCTAACAAATTTGAAA  
 AATGCTCTAAGATTGTTGGCCAAATATACCAAATCTGACAACTAAAAATTTTACGTGATCA  
 TGAGCCCTACAGAGCTTTATCCCAGGCATACGACACACTTTCAATTGACGAGTCTGTTGATG  
 AAGACATTATAAAAACTGCATATTCGGTCAAGATTAACGACTCTCCCGATTAAAGTTGGAT

TGTGATAGAGCACTTTACACCATTGCTATCAGTAAAAGAAGCCTTGATTTGTTCAATTTTTT  
AACAGAGGAATGCCACAGTTTTCCAACATATATGGTCCAGAGAAGCTTGATTACCAAGAGG  
CATTTGAAGCTTCTTCAAGTGAATGAAAATGCCCTGACGAAACCATTTTGAAAATCTTTAAA  
CAAAAGTGGTTTTGATGAAAACGTTTTATGAGCCTGACCAATTTCTTATTTTGAGGGCAGCATT  
GACCAAAATCAGTATAGAAAAGAAATTTCAACTTTAATCACCAACTTCTTACTAACTGGTACGA  
TAGATCCAAATTCCTTGCCGCCAGAAAATTTGGCCAACCTGGCATTAAATAATATCGGGAACACC  
TGTTACCTAAATTCCTTATTACAATATTACTTTTTCCATTGCGCCACTAAGAAGATATGTATT  
GGAATATCAAAAAACGGTAGAAAATTTCAATGACCACCTCTCTAATAGTGGGCATATTAGAA  
GAATTGGTGGAAAGAGAAATTAGTAGAGGGCGAAGTGGAAAGATCTATTCAATTCATATACCAA  
CTTCGCAACCTTTTCTATGCGATGGTTTCATACAAGAGAAAAGATGTGTAACACCCTCAAAAAGA  
GCTAGCATATTTGGCATTGCTCCAAGTAATGTTGAAGTAGAATTTGAAGTGGAAAGGCAATA  
AAGTAGTTGATCAAACAGGAGTTCTTTCCGATTCAAAGAAGGAAACAACGGATGACGCATTT  
ACTACAAAATAAAGGATACAAGCCTGATTGATTTAGAAAATGGAAGATGGCCTTAATGGCGA  
TGTGGTACAGATGCGAACAGAAAAAAAATGAATCGAATGATGCTGAAGTAAGTGAAGAACG  
AAGATACAACAGGATTAACCTCACCTACGCGTGTGGCAAAAATCAGTTCTGATCAATTAGAA  
AATGCTTTGGAAAATGGGTAGGCAACAAGATGTTACTGAATGCATAGGAAACGTGTTATTTCA  
GATAGAAAGCGGTTCCAGAGCCTATCCGATATGATGAAGACAACGAGCAATATGACTTGGTTA  
AGCAACTATTTTTATGGTACTACTAAACAAAAGTATTGTTCCCTTTGTCCGCAACAAAATAAAGTC  
CGTACGAAAGTTGAAAGATTCCATATCGTTACTGATAAATATTTGGCGATCATCCTAAAGATAT  
TTATGATGCGTTTGATTCTTATTTTAAAGACGAATATCTGACAATGGAAGAGTATGGTGATG  
TTATACGTACCGTTGCTGTTACAACCTTTTCCACTATTTTGCAGGTACAAATCCAAAAGAGTT  
TATTACGATCGTGAAAGATTAATGCCGTTTAAATCCATTGAGCCCTTACCATTCAAAGAAGT  
TATTTACATGGACAGATACGCGGATACAGAGAACCCTTTATTTGTTGGCAAAAAGAAAAGAAA  
CAGAAGAAATGAAGCAAAAGTTGAAGGTAATGAAAAATAGACAAAGAGAGCTTTTTGAGTCGT  
GATGATTCAGGGCTTACAAGGAAGGATGCATTTTTTGGAGAGTATCAAGCTATTGGAATCGGA  
TACCATAAAGAAAACCTCTTTAAAAATTGAGGCTGCTAATGATGTGATAAAGACGCTGAGAA  
ACAACGTTCAAAAATATCGATAATGAATTGATGAAATTATACAATGATATCAACAGTTTGGA  
GAGAAAATAAGCCATCAATTTGACGATTTCAAGGAATATGGTTACTCACTGTTTTTCGGTTTTT  
TATTCATCGCGGCGAGGCCAGTTATGGTCACTATTGGATATATATCAAGGACAGAAAATCGCA  
ATGGAATTTGGAGGAAGTACAATGATGAAACCATCAGTGAGGTCCAGGAAGAGGAGGTCTTC  
AATTTCAATGAGGGTAACACTGCAACTCCATATTTCTAGTATATGTCAAACAAGGACAAGA  
AGGTGATATTGAGCCATTGAAAAGAATTCTAAAGTAG

>YLR156W 0.81 Cold

ATGAAGTTCCAATATGCGTTGGCCAAGGAACAGCTAGGCAGCAACTCGCGCAGTGGCGTCAA  
AAAACATAAAGTAAACACCCTGGCTTCCGGAATACTATTTCTCTGATCTCTCATTTTTCTG  
TTGTACAGCAGTGGGACAGTAGAGCCATTGAAAAAATAACAATCATATCTTGTATGCGGCC  
GCAAACCAAGAGATTTATCCTTTGAGACATTGTGAGACCCTCCGTTGCAACCGTGTCTCT  
GTTTTCATCACTATATGCACGCTCTTTCCAAAGCTCCTGCACCTTTGCACGTGGCGGAGCCAT  
CGCCCGGCTTCCATATGTACGGCTGCCACACCTAA

>YBL024W 0.81 Cold

ATGGCTAGAAGAAAGAATTTCAAAAAGGGAACAAGAAGACTTTTTGGTGTCTCGTGATGACTC  
GAGAGCTCAAAAAAAGTGGTCTGAACTGGTAAAGGAAAATGAAAAATGGGAAAAATACTATA  
AGACTTTAGCTCTTTTCCCAGAAGATCAATGGGAAGAATTTAAAAAGACATGTCAAGCTCCA  
CTTCTCTAACTTTTAGAATTACAGGTTCTAGAAAGCATGCCGGTGAGGTCTGAATTTGTT  
TAAAGAAAGACATCTACCAAACCTTGACTAATGTTGAGTTTGAAGGTGAGAAGATTAAGGCC  
CTGTAGAATTACCTTGGTATCCAGACCATCTTGCTTGGCAATTGGACGTTCCCTAAGACGGTT  
ATTAGAAAGAATGAACAATTCGCAAAAACCTCAGAGATTTTAGTTGTTGAAAATGCCGTTGG  
TAATATCTCAAGACAAGAAGCCGTTTCAATGATTCCTCCAATCGTTCTAGAAGTAAAACCTC  
ATCACACTGTTTTAGATATGTGTGCTGCTCCTGGCTCCAAAACCTGCTCAATTAATCGAAGCC  
TTGCACAAGGATACAGATGAACCATCTGGTTTCGTTGTAGCTAATGATGCCGATGCCAGAAG  
ATCTCATATGTTGGTTCACCAATTGAAGAGATTGAACAGTGCCAACCTTGATGGTTGTCAACC  
ATGACGCCCAATTTCTCCACGTATCAGATTACATGGCAACTCAAATAACAAGAATGATGTT  
TTAAAATTTGACAGAATCCTGTGTGACGTTCCATGTTCTGGTGATGGTACCATGAGGAAAA  
TGTTAATGTTTGGAAAGACTGGAACACACAAGCAGGTCTTGGTTTGCATGCTGTTTCAGCTGA  
ATATATTAACAGGGGTTTTGCATCTTCTAAAGAACAACGGTAGATTGGTTACTCAACCTGT

TCTTTAAATCCTATTGAAAATGAAGCGGTTGTTGCCGAAGCGTTAAGAAAGTGGGGTGACAA  
 GATTAGATTAGTTAACTGTGATGATAAGCTTCCTGGCCTAATAAGATCCAAGGGTGTATCCA  
 AATGGCCTGTCTATGACAGAAATTTGACTGAGAAAACCAAAGGAGACGAAGGTACACTAGAT  
 AGTTTCTTTTACCATCTGAAGAAGAGGCATCGAAATTCATTTACAAAATTGTATGAGGGT  
 TTATCCTCACCAACAAAACACAGGCGGATTTTTCATTACTGTTTTCGAAAAAGTCGAAGATA  
 GCACTGAGGCGGCTACAGAGAACTATCTTCTGAAACCCAGCTCTAGAGTCTGAAGGACCT  
 CAAACAAAGAAAAATAAAGGTAGAAGAAGTCCAAAAGAAAAGAAAGACTACCACGTGACGCGAA  
 CGAAGAGCCTTTTGTTTTCGTTGATCCACAGCACGAAGCTTTAAAAGTTTGTGGGATTTCT  
 ACGGCATCGATAATATTTTCGACAGAAACACTTGTTTAGTGCCTAACGCCACTGGTGAACCA  
 ACAAGAGTGGTTTACTGTGTGTCCAGCATGGAAGGATGTTATTCAAGCGAATGACGATAG  
 GTTGAAGATTATTTATTCTGGTGTAAAATTGTTTGTCTCTCAAAGAAGTGATATCGAATGTT  
 CATGGAGAATCCAAAGTGAATCATTGCCAATAATGAAACACCATATGAAATCTAATAGAATT  
 GTTGAAGCTAATTTAGAGATGTTAAAACACTTGTAAATCGAATCTTTCCCTAACTTTGACGA  
 CATTCGTTTCAAGAACATCGATAATGATTTTGTGAAAAGATGACAAAAATTAAGCTCTGGTT  
 GCGCCTTTATTGATGTGTCAAGAAATGACCCGTGCCAAAAGAAAACCTTATTCCTGCCTGTGTGG  
 AAAGGCAACAAGTGTATCAATTTGATGGTTTGTAAAGAAGATACTCATGAGCTATTATATAG  
 GATCTTTGGTATTGATGCGAATGCCAAGGCTACTCCAAGCGCTGAAGAAAAAGAAAAAGAAA  
 AAGAAACGACTGAATCTCCCGCAGAACTACTACCGGAACCTCTACTGAAGCTCCTAGCGCT  
 GCTAATTGA

>YHR185C 0.78 Cold

ATGAATCAAGGTTACACACAGCTTTCCGCACCGGAAGTGAAGGAGACTAAAACATCGAAGCT  
 AAATAAAATGAACAACCTTTTGAAGCTCTCCGATTGCTGAGATAATTAATAAGATACCACCAG  
 ATTGCGGGAAGATACAGAATACAACATTTCCCTGAGTTCAATCCAGCGTTAAGAAGACGACAA  
 CACGAACAGTGGCCTGCATACGAAAAACCAATAAGAGTTACTGACAGTATGTCACCACAGCT  
 TTCTTCAATCAATTTGTTTGCCAAATTTGTATCCCCACGGTACGCTACCATTACCAAACCTT  
 ATTTATCCTATTTAAATCACATTGAAAAAGTTAATTGCCAAGATGTCAAGTTTAGTAACTGG  
 AGTGTTTTACATAATTCGAATAATGGATTTGAAATTCGACATATTTTCAAGTCCACGGACAAC  
 ACAAACATGCCCTTGTTCGAAAAAGTTGAAAGCTGGCTTGAAGATTACCAATTTTTGTGG  
 GGTTCGACGGTTATTTATTTACAACTGCTTTGATTATGAATATATGTTGGATTGGGAAGAG  
 ACAGAATTTACATTTCGAGAAAACATCATGTATGGAGACGGATTATTCTAAAGCTTTAACCGA  
 TACTGATATTATATATATTTCAAGAGAAAAAATTTGAAGCGTTGATAAGAAACCAATATCTGA  
 AGGAGTATGAATTTTCTCAAAAAGATTTTTGA

>YJL091C 0.78 Cold

ATGTCGACTTTAAAACAGAGAAAAGAGGACTTTGTGACAGGGCTCAATGGCGGTTCTATAAC  
 AGAAATTAACGCAGTGACATCAATTGCTTTGGTAACTTACATATCATGGAACCTTATTGAAAA  
 ATTCCAACCTTATGCCTCCTGGCATTTCAGCGTGCAATACATAATTGATTTTGCATTGAAC  
 TGGGTTGCTTTGCTTCTATCTATTACTATTTATGCTAGTGAACCATACTTCTAAACACGCT  
 AATACTGTTACCTTGTGTTGCTCGCATTATATATGAAAAATTTACTAGCTCGAGTAAACCTT  
 CTAATCCAATATACAATAAAAAAAAAAATGATTACACAGCGGTTCCAAC TAGAAAAAAGCCG  
 TATATTACTGCGTATCGTGGTGGGATGCTTATTCTGACTGCTATTGCCATCTTGGCTGTAGA  
 TTTTCCAATTTTCCAAGGAGGTTTGCCTAAGGTGGAACCTGGGGGACATCCCTGATGGATC  
 TTGGTGTAGGATCATTGTTTTTCAGTAACGGTATTGTTTCTTAGGGCATTGTTGAAAAAC  
 CTAAGCTTGAAGAGTAAACCCAGCTTCTTAAAAAATGCATTTAATGCCCTAAAATCAGGAGG  
 AACTCTATTGTTCCTAGGATTGCTGAGGTTGTTTTTTGTAAAAAATTTGGAATATCAAGAAC  
 ATGTCACAGAATATGGGGTTCATTGGAATTTTTTTTATCACCCCTATCATTGTTGCCACTTGTA  
 TTGACCTTTATTGATCCCGTCACAAGAATGGTTCCACGCTGCTCAATTGCAATATTCATTTT  
 ATGCATTTATGAATGGCTACTTTTAAAGGACGATCGCACTTTAACTTTTTAATTTTGGCTG  
 ATAGAAATTTGTTCTTTCAGTGCTAATAGAGAAGGCATCTTCTCATTCTTAGGTTATTGCTCG  
 ATTTTCTTTTGGGGCCAAAACACGGGATTTTACTTGTGGGAAATAAACCAACTTTAAACAA  
 TCTTTATAAGCCTTCTACGCAAGACGTAGTTGCAGCATCAAAGAAGTCTTCGACTTGGGACT  
 ATTGGACTTCAGTAACCCCATTAAGTGGCTCTGTATATGGAGTACAATTTTTCTTGTATC  
 AGCCAGTTGGTTTTTCAATACCATCCTTATAGTGTTCGAAGAAGGTTTGTAACTTACCATA  
 TACTTTGTGGGTCATTACTTATAATTTACTATTTTTGACTGGGTTACTGCTTACTGACAAAA  
 TTTTCCGTAATCTTCCGAATATTATAAAGTTGCCGAATGCTTGAATCAATCAACTCCAAT  
 GGGTGTTTTTTATTTTTGTTGGCAAATGTCTCTACTGGTTTAGTCAATATGTCTATGGTCAAC

GATAGATTCTTCACCCTTAAAATCATTCTGGTTTTGTTGGCATACTGCTCATTTCATAGCTG  
TCATATCGTTTTCTTGTATAGAAAAAGAATATTCATTAAGCTATAA

>YPL189W 0.76 Cold

ATGTCGATGTTAAGAATCTGGAGTTGCATCGTACATTTCTTTTCCGTGCAGGCACTTGATTC  
ACGAATAAAGCCAGACATTGAATTCAAAAGGCGACAAAGGATATTTATCAATTCATCTAAAG  
AAGAGAATGGTTCATCTTCTAGTGCCGTTACTGTTACCCGTAACCCTGTGCTCAGCTCTAAT  
AGCCCATCTCCTCCGCTATGGAATACATGGGAATTTAGACTATATTATTTGGCGTTCACCGT  
AGTAGTTCCTTTCATGATAAAGGCGGCATTGGCTACGAGCTCCGAGTCTAATCCAACTACT  
ATAAATTCAGCGGACTGCTAGCCCATGGTTGGATTCTGGGCCGCAAAGTGGATAACAGCGAT  
CCTCAGTATAGGTTTTTTAGATCCAATTTTTTTTTGTTGGCCATCTTAATATTACTACAAAT  
TATATTAAAAAAGTTTTTTGTTAAATTTAGTAAAATTCGAAAACAAAAATTCGATTTTGCCT  
GTGGATTAGTTTTTGTCTGTTTCATGTACGGGATCAATTCGTAAAGCTCTTTACGCATGCT  
TTTATTTTCTTCACTTTGGCACATTTCGCTAAAAGAGAAAAGCGTTTTGATAGCCGCTTTTGCCT  
TTGGTCCCTATGGTATCTTTACACTATTCATCAATCAAAAAATGAAAAATCTCCCTTTAATA  
ATATTGCTATCATCCTAAGTCCCATGGATCAATGGTATAAGGGTATCGTTCCTCGATGGGAT  
TTTTTTTTCAATTTTACATTATTGCGTTTTGTTAAGTTACTCCATGGATTTTTTGGAAAAGATG  
GCATGAACAATTGAGCCGCCAACCTTCGATAGATTACGATGATAGACGACCTGAATTCAGAA  
AAAGTTTATCTGGTTCCTACTCTACAAACCATTTATGAGTCAGGTAAGAATGTTCTGGAGGAA  
AAGGAACGACTGGTAGCAGAACATCACATCCAGGATTACAACCTTTATCAATTTTATCGCTTA  
TATTACTTACGCGCCATTGTTTTTAGTGGGCCCAATTATCACTTTTAATGACTACCTTTATC  
AATCAGAAAATAAGCTTCCTTCGCTAACGAAAAAAACATAGGCTTCTATGCCCTCAAAGTA  
TTTTCGAGTTTTGCTTTTTGATGGAAATTATCCTACATTATATCTATGTGGGTGCAATAGCAAG  
GACCAAGGCATGGAACAATGATACACCCTTGCAACAGGCTATGATCGCGCTGTTCAACTTGA  
ACATTATGTATTTAAAACCTTTGATCCCATGGAGGCTCTTTCGGCTGTGGGCCATGGTCGAT  
GGTATTGATGCACCTGAAAATATGCTACGATGTGTGGATAATAATTATAGTACAGTGGGATT  
CTGGAGAGCCTGGCATAACAAGTTTTAACAAGTGGGTAATCCGTTACATCTATGTTCCATTTG  
GCGGGTCCAATAACAAAATATTAACGAGCTTTGCCGTATTCATTTGTAGCAATATGGCAT  
GACATCCAATTACGAGTGTGTTTTGGGGGTGGTTAACAGTCCTTTTATATTAGGCGAAAC  
CTACATTACTAACTGTTTTAGTAGATATAGATTCAGAAGCTGGTACAGGTTTTGTTTGGGTA  
TCGGTGCTGCAATAAATATTTGCATGATGATGATTATTAATGTCTATGGATTTTGGCTGGGT  
GCAGAGGGAACGAAGCTTCTATTGAAGGGCATATTTAACAATTCACATAGTCCGGAGTTTTT  
GACTGCGGTAATGGTAAGCCTATTTATTGCTGTTTCAGGTAATGTTTGAGATTAGAGAAGAAG  
AAAAAGACATGGCATCAACTTGAATGTTGA

>YFL051C 0.81 Cold

ATGTCATATACCCCATTCGTAATTTTCGGCACTCTTGGTCTTCGTGGCGCTAGCTACTACAAC  
CTTAGCCAGTACAGAAGCTTGCTTACCAACAAACAAAAGGGAAGATGGTATGAATATTAATT  
TTTATGAGTACACAATAGGCGACCAAAACCACATACTTGGAGCCTGAATATATGGGCTATGAA  
TACTCCAATACAAAAGAAGTTAGGTTCCGTTAGCGGACAGACCAATCTCTCCATATACTATAG  
TCCGCCTTGTGAGAGCACTCCTACCTGTGTGACTTATGCAGTTTTGAAGCGTGATGAGGATG  
GATATGATCCTTGCAGGACCTCTTTATGAAACTAAAAACGTGACACTGAATACTGTGACCCA  
AATACTGCCTATTGGAGTCTGATCTTTTTGGTTTTCTATACTACTCCAACATAATGTAACGTG  
GAAATGACAGGGTACTTAATATGGAGTATGGGCAACCGACGCCGTTGA

>YKL075C 0.71 Cold

ATGGCTAAAGATTTATTGCCCAAGCAAGCGGCCAACGAGCCATCGTTAAAGGACTGTACCTG  
TAAAAGATGTCTTAAATTGGGTGCTTCAAAGAAAAAAGATTAGAAGAAAGAAGAAAGGTG  
AGGAGAAAAGAGAAAGACATTATGGAAATAGACGAAAGTTAACATTCACCTTTTTGAAGCAT  
ACGAACATGGAANAATACAAATTACGACGTAATCACTTCGGTTGGATATCTGAATGAAAAATA  
CGGATTGAAAAAATCACATTACATTGAAAAATTTATCAAATGCATCCATAGAAAAATAAATA  
TCGATGTTAGCAAAATTACGGACGCCTATGTAAACTCGCTAAACCCGTGGGTTAAAGTAAAA  
CTCTTCCTTTTATTGGTGACATTGTCTGAAAAGGGTGGTCCGGAATACTGGCTAGATAAGAC  
AGATGGTGAAGAAGACTCAGAGGCGCTTCAACAGATAATAGTTTGGAAAATCTACTAAAG  
GAGCAGATAGCGCTGGATCTACTGCTTTGAGAGATGAAATGGTCAAAAGCCATAAAAACTTT  
TTCCCAACTCTTACAGAGCAAATCATAACAGCATAACATCAACCAAGATTTTACGGAATCGAC  
TTACGACGAGGATTATGTATTTTCGTCAATTTGGGCAAACTTCATGGAAGGACTGATCAATC

ACTATTTGGAAAAAGTCATTGTACCTTACTCGGAAATGAAAAGTCTGTCAGCAATTATACAAG  
 CCTATGATGAAAAATTATCTCCCTCTATAACGAATACAATGAGCTTATGGTCAAAAGCGAAAA  
 GAACGGATTCTTGCCTTCTCTACAAGACTCCGAAAATGTCCAAGGTGATAAAGGCGAAAAAG  
 AGAGCAAGGATGATGCCGTTAGCCAAGAAAGACTGGAAAAGAGCGCAAAAGCTGTTATGGCAA  
 GCTCGAGAAGATATTCAAAAACAATTAGCAAAGAATTAACGTTGTTATCAGAAATGTATTC  
 TACATTATCTGCTGATGAGCAAGATTACGAATTAGATGAATTTGTTTGTGCGCAGAGGAGT  
 ACATTGAATTGGAATACCTACCTGCCCTTGTAGATGTCTTGTGCTAATTTGTGGCACGAAC  
 AACTTCTGAAAAATTATGTTGGTGTGGAACCCTTTTTCTACTACATTGAAGACGTGGCGG  
 AGATGATGATGAAGATGAAGATAATGTGGACAATAGCGAGGGCGACGAAGAAAGCTTACTTA  
 GCAGGAATGTGGAAGGAGATGATAATGTGGTGTGAGCGTCATTTTAAGCCTGATCCAAGGGTC  
 ATTACTGAAAAAATATGTGAAGTTGCTGCAAGACAGAAATGGATATAA

>YPL153C 0.78 Cold

ATGGAAAATATTACACAACCCACACAGCAATCCACGCAGGCTACTCAAAGGTTTTTGGATTGA  
 GAAGTTTTCTCAAGAACAGATCGGCGAAAAACATTGTGTGCAGGGTCATTTGTACCACGGGTC  
 AAATTCCCATCCGAGATTTGTCAGCTGATATTTCAACAAGTGCTTAAGGAAAAACGATCCATA  
 AAGAAAGTTTTGGACATTTGGTAGAAACCCAGCCTGTGACTATCATTTAGGAAACATTTCAAG  
 ACTGTCAAATAAGCATTTCCAAATACTACTAGGAGAAGACGGTAACCTTTTATTGAATGACA  
 TTTCCACTAATGGGACCTGGTTAAATGGGCAAAAAGTTCGAGAAGAACAGCAATCAGTTACTG  
 TCTCAAGGTGATGAAATAACCGTTGGTGTAGGCGTGGAAATCAGATATTTTATCTCTGGTCAT  
 TTTTATAAACGCACAAATTTAAGCAGTGCCTCGAGCAGAACAAGTTGATCGCATAAGATCTA  
 ACCTGAAAAATACCTCTAAAAATAGCTTCTCCTGGTCTTACATCATCTACTGCATCATCAATG  
 GTGGCCAACAAGACTGGTATTTTTAAGGATTTTTTCGATTATTGACGAAGTGGTGGGCCAGGG  
 TGCATTTGCCACAGTAAAGAAAAGCCATTGAAAGAACTACTGGGAAAAACATTCGCGGTGAAGA  
 TTATAAGTAAACGCAAAGTAATAGGCAATATGGATGGTGTGACAAGAGAGTTAGAAGTATTG  
 CAAAAGCTCAATCATCCAAGGATAGTACGATTGAAAGGATTTTATGAAGATACTGAGAGTTA  
 TTATATGGTGATGGAGTTTCGTTTCTGGTGGTGACTTAATGGATTTTTGTTGCTGCTCATGGTG  
 CGGTTGGAGAAGATGCTGGGAGGAGATATCCAGGCAGATACTCACAGCAATAAAATACATT  
 CACTCTATGGGCATCAGCCATCGTGACCTAAAGCCGATAATATTCTTATTGAACAAGACGA  
 TCCGTGATTTGGTAAAGATAACCGACTTTGGTCTGGCAAAAAGTACAAGGAAATGGGTCTTTTA  
 TGAAAACCTTCTGTGGCACTTTGGCATATGTGGCACCTGAAGTCATCAGAGGTAAGATAACA  
 TCCGTATCTCCTGATGAATACGAAGAAAGGAATGAGTACTCTTCGTTAGTGGATATGTGGTC  
 AATGGGATGTCTTGTGTATGTTATCCTAACGGGCCACTTACCTTTTAGTGGTAGCACACAGG  
 ACCAATTATATAAACAGATTGGAAGAGGCTCATATCATGAAGGGCCCCCTCAAAGATTTCCGG  
 ATATCTGAAGAAGCAAGAGATTTATAGATTCAATTGTTACAGGTGGATCCAATAATAGGTC  
 GACAGCTGCAAAAGCCTTGAATCATCCCTGGATCAAGATGAGTCCATTGGGCTCACAATCAT  
 ATGGTGATTTTTTCAAAATATCCTTATCACAATCGTTGTCGCAGCAGAAATTATTAGAAAAT  
 ATGGACGATGCTCAATACGAATTTGTCAAAGCGCAAAGGAAATTACAAATGGAGCAACAACCT  
 TCAAGAACAGGATCAGGAAGACCAAGATGGAAAAATTCAGGATTTAAAATACCCGCACACG  
 CCCCTATTCGATATACACAGCCAAAAGCATTGAAGCAGAACTAGAGAACAAAACCTTTTA  
 CATTCCAATAATACTGAGAATGTCAAGAGCTCAAAGAAAAAGGGTAATGGTAGGTTTTTAAAC  
 TTTAAAACCATTTGCCTGACAGCATTATTCAAGAAAGCCTGGAGATTCAGCAAGGTGTGAATC  
 CATTTTTTATTGGTAGATCCGAGGATTGCAATTGTAAAAATTGAAGACAATAGGTTGTCTCGA  
 GTTCATTGCTTCATTTTCAAAAAGAGGCATGCTGTAGGCAAAAGCATGTATGAATCTCCGGC  
 ACAAGGTTTAGATGATATTTGGTATTGCCACACCCGGAACCTAACGTGAGCTATTTAAATAATA  
 ACCGCATGATACAGGGTACGAAATTCCTTTTACAAGACGGAGATGAAATCAAGATCATTTGG  
 GATAAAAACAATAAATTTGTTCATTGGCTTTAAAGTGGAAATTAACGATACTACAGGTCTGTT  
 TAACGAGGGATTAGGTATGTTACAAGAACAAGAGTAGTACTTAAGCAAACAGCCGAAGAAA  
 AAGATTTGGTAAAAAGTTAACCCAGATGATGGCAGCTCAACGTGCAAATCAACCCCTCGGCT  
 TCTTCTTTCATCAATGTCCGCTAAGAAGCCGCCAGTTAGCGATACAAATAATAACGGCAATAA  
 TTCGGTACTAAACGACTTGGTAGAGTACCCGATTAATGCGAATACGGGGAACATTTTGAAGA  
 GAATACATTCCGTAAGTTTATCGCAATCACAAATTGATCCTAGTAAGAAGGTTAAAAGGGCA  
 AAATTTGGACCAAACCTCAAAAGGCCCCGAGAATTTGCAATTTTCGTAA

>YGR010W 0.79 Cold

ATGGATCCCACCAAAGCACCCGATTTTAAACCGCCACAGCCAAATGAAGAACTACAACCACC  
 GCCAGATCCAACACATACGATACCAAAATCTGGACCCATAGTTCCATATGTTTTAGCTGATT

ATAATTCTTCGATCGATGCTCCTTTCAATCTCGACATTTACAAAACCTGTCGTCAAGGAAA  
 AAAAACGCCAACTCAAGCAACCGAATGGACCATATTCCATTAATACTAGTGACTTCCAGCC  
 ACTATCTCGGGATGTATCATCGGAGGAGGAAAAGTGAAGGGCAATCGAATGGAATTGACGCTA  
 CTCTACAGGATGTTACGATGACTGGGAATTTGGGGTACTGAAGAGCCAAATTGCTGATTTG  
 GAAGAAGTTCCACACAATTGTAAGACAAGCCAGAACTATTGAAGATTACGAATTTCCCTGT  
 ACACAGATTGACGAAAAAGTTACAAGATCCTGAAAACTGCCTCTGATCATCGTTGCTTGTG  
 GATCATTTTTCTCCATAACATACTACATTTGAGAATGTTTGAATGGCTTTAGATGATATC  
 AATGAGCAAACGCGTTTTGAAGTGGTTGGTGGTTATTTTTCTCCAGTAAGTGATAACTATCA  
 AAAGCGAGGGTTAGCCCCAGCTTATCATCGTGTCCGCATGTGCGAATTAGCATGCGAGCGGA  
 CATCATCTTGGTTAATGGTTGATGCCTGGGAATCTTTACAATCAAGTTATACAAGGACAGCA  
 AAAGTCTTGGACCATTTCAATCATGAAATAAATATCAAGAGAGGTGGAATCATGACTGTAGA  
 TGGTGAAAAAATGGGCGTAAAAATCATGTTATTGGCAGGCGGTGATCTTATCGAATCCATGG  
 GCGAGCCTCATGTGTGGGCTGATTCAGACCTGCACCATATTTTGGGTAATTATGGATGTTTG  
 ATCGTGAAAGGACTGGTTCTGATGTTAGGTCCTTCTTGCTTTCCCATGATATCATGTATGA  
 ACACAGAAGAAATATCCTTATTATCAACAACCTATTTACAATGATATTTCTCTACGAAAG  
 TGCGGCTTTTCATCAGACGTGGAATGTCAGTTCAATATCTTCTTCCAAACTCTGTATCCGT  
 TACATCCAAGAGTATAATCTATACATTAATCAAAGTGAACCGGTCAAGCAGGTCTTGGATAG  
 CAAAGAGTGA

>YOR323C 0.75 Cold

ATGTCCAGTTCACAACAAATAGCCAAAAATGCCCGTAAAGCAGGGAATATTTTTGAAAACCAT  
 CTCAAACGAGGGCAGATCAGATATTTTTATACAAAATTCACGATGCCCTGAAGGCTAATGCGC  
 ATGCCATTGAAGAAGCGAATAAAATCGATTTAGCTGTTGCCAAAGAGACTGGCCTAGCGGAT  
 TCTTTATTGAAACGTCTCGACCTATTTAAAGGGGACAAAATTTGAAGTTATGTTACAAGGTAT  
 TAAGGATGTAGCCGAAGTAGAAGACCCTGTTGGCAAGGTTAAAATGGCCAGGGAATTAGATG  
 ATGGCTTGACGTTGTACCAAGTAACCGCTCCAGTCCGGCGTTTTGTTAGTTATCTTTGAATCC  
 CGTCCAGAAGTTATTGCCAATATTACCGCATTGAGTATCAAGTCTGGTAATGCTGCAATTTT  
 GAAGGTGGTAAAGAGTCTGTGAACACGTTTCAAGAGAAATGGCAAAGATCGTTAACGACACCA  
 TTGCACAATTTCCAAAGTGAGACTGGTGTTCCTGTGGGCTCTGTGCAATTGATCGAAACCAGA  
 CAGGATGTTTTCCGACTTGTGGATCAAGATGAGTACATCGACTTAGTTGTTCCCTCGTGGTTC  
 CAATGCCTTAGTCAGAAAAATCAAGGACACTACAAAATTTCCCGTGTGGGTTCATGCGGATG  
 GTATCTGCTCAATTTACTTGGATGAAGACGCAGATTTGATTAAGGCAAAAAGAATTAGTTTG  
 GATGCAAAGACTAACTACCCAGCTGGTTGCAACGCTATGGAAACGTTGTTGATTAACCCAAA  
 ATCTCTAAGTGGTGGGAAGTCTGGAAAATTAACCTTTGGAAGGCGGAGTGACTATCCACG  
 CTACAAAAGATTTGAAAATCGCTATTTTTGATAAACTGAATGAGTTAGGGAAATTGACAGAA  
 GCAATTC AATGCAAACCGTTGATGCTGATGAGGAGCAAGATTTTGATAAGGAATTTTTATC  
 CTTGGATTTGGCTGCCAAGTTTGTACATCTACAGAATCGGCCATTCAACATATAAATACAC  
 ACTCTTCGAGACATACCGACGCTATTGTAACGGAATAAAGCAAACGCTGAAAAATTTATG  
 AAGGTGTGACTCCTCTGGTTTTACTGGAATGCATCAACTAGATTTGCCGATGGTTTTAG  
 GTACGGTTTTTGGTGTGAAGTGGGTATTTCTACCTCTAAGATTCACGCCCGTGGTCCAGTTG  
 GCTTGGACGGTCTGGTGAAGTATCAATACCAAATAAGAGGTGACGGCCAGGTTGCTAGTGAC  
 TACCTTGGTGTGGTGGTAACAAAGCTTTTTGTTTACAAGGATTTAGATATAAAGACTGTGAC  
 ATTATAA

>YHR212C 0.8 Cold

ATGTCAAAAACCGATGTCAAAAAATCTCGTGAGGCCTCCGGAATTTTGACGCTGCAAGTCAA  
 TCTACGGGAAAGAAGAAATTTTTAACTTAATGCAAAAATAAGCTTTTTTCTTGGAAAATAA  
 GATTTTCGGCAATAAAAGGTAAATGCAGCCAAAATCAAAAATACTTCAGAAGAAGTCGTAGC  
 GAGGACTGCTACGTGGAAGCGGATTTGAAGATCCTTTCCAGAACAAGAAGGAGCCGAAAGCT  
 GCCAGGAAGTTCCTGATTTTTTAGGAAAACAATTAATAGGTATCTCGTCTAGCGTAGTAT  
 CTCGAGTTTTCCAGAAGTTGCAGATAA

>YAR069C 0.74 Cold

ATGGAGGACCACACCCTTGTGGCCATCGTTGTTTTCTTTGGGAATGGTGAACCTTTCCATGT  
 GTCGTTGTCTGTAGAAATGGTGTTCGTGCTGCTTCTTTCATCCACTAGAAATTCATGAGGTAG  
 TAGTTCTTATATGTTATAAACTTCAACACGCCACCTGGTCTTGGGGTAATATGAGCAAGAAT



TTCTCTCTTAAACCGGATATAAGTCTGAGCTTTCTGTTGGATATAATTTCTATAAATGATAT  
ATGCATCTACGGTTGCATTGCCCTTACAGTTGTGTTTATTTTATAA

>YBR002C 0.77 Cold

ATGGAACGGATAGTGGTATACCTGGTCATTCATTTGTGTTAAAGTGGACAAAAACATCTT  
TTCGCGCACATTGCGTGCATCTAACTGTGTACCTAGACATGTTGGGTTTCATCATGGATGGGA  
ACAGGAGATTGCTAGAAAGAAAGAGATGGACGTAAAGGAGGGCCACGAGGCAGGATTTGTT  
AGTATGAGTAGAATCTTAGAACTGTGTTATGAAGCAGGAGTCGATACGGCTACCGTGTTCG  
CTTTTCAATTGAAAATTTCAAGAGGAGCTCACGGGAAGTTGAATCACTGATGACTTTAGCGC  
GCGAAAGGATACGACAAATCACAGAACGTGGAGAGCTGGCCGTAAAGTATGGGGTACGCATT  
AAAATTATCGGCGATCTCTCTTTGTTGGATAAGTCTCTATTAGAAGATGTTCCGGGTTGCTGT  
GGAACTACAAAAGAACAACAAAAGGGCCACGTAAATATCTGCTTTCCATATACAGGCAGGG  
AAGAAATCTTGCATGCCATGAAAGAAACAATTTGTTCAACATAAGAAGGGCGCCGCTATAGAC  
GAAAGCACGTTAGAATCGCATCTCTACACGGCGGGGTACCCCTTTAGATTTATTGATTAG  
GACAAGTGGCGTTTCCAGATTAAGTGACTTTTTGATATGGCAGGCATCGAGTAAGGGCGTAC  
GCATCGAATTGCTGGATTGTTTATGGCCAGAGTTTGGACCTATACGGATGGCATGGATTTTA  
TTAAAATTTTTCGTTTCAAAAATCCTTTTTTAAACAAAGAGTACAGATTAGAGGAAGGTGATTA  
TGACGAGGAAACCAATGGGGACCCCATCGATTTGAAAGAAAAAAGTTGAATTA

>YDR536W 0.81 Cold

ATGAAGGATTTAAAATTATCGAATTTCAAAGGCAAATTTATAAGCAGAACCAGTCACTGGGG  
ACTTACGGGTAAAGAAGTTGCGGTATTTTCATCACTATCGCATCTATGACGGGCTTCTCCCTGT  
TTGGATACGACCAAGGGTTGATGGCAAGTCTAATTACTGGTAAACAGTTCAACTATGAATTT  
CCAGCAACCAAAGAAAATGGCGATCATGACAGACACGCAACTGTAGTGCAGGGCGCTACAAC  
CTCCTGTTATGAATTAGGTTGTTTCGCAGGTTCTCTATTTCGTTATGTTCTGCGGTGAAAGAA  
TTGGTAGAAAACCATTAATCCTGATGGGTTCCGTAATAACCATCATTGGTGCCGTTATTTCT  
ACATGCGCATTTTCGTGGTTACTGGGCATTAGGCCAGTTTATCATCGGAAGAGTCGTCACCGG  
TGTTGGAACAGGGTTGAATACATCTACTATTCCCGTTTGGCAATCAGAAATGTCAAAAAGCTG  
AAAATAGAGGGTTGCTGGTCAATTTAGAAGGTTCCACAATGCTTTTTGGTACTATGATTGCT  
TATTGGATTGATTTTGGGTTGTCTTATACCAACAGTTCTGTTTCAGTGGAGATTCCCCGTGTC  
AATGCAAATCGTTTTTGTCTCTTCCCTGCTTGTCTTTCATGATTAAACTACCTGAATCGCCAC  
GTTGGCTGATTTCTCAAAGTCGAACAGAAGAAGCTCGCTACTTGGTAGGAACACTAGACGAC  
GCGGATCCAAATGATGAGGAAGTTATAACAGAAGTTGCTATGCTTCACGATGCTGTTAACAG  
GACCAAACACGAGAAACATTCACGTCAAGTTTGTCTCCAGAGGCAGGTCCCAAAATCTTC  
AGAGGGCTTTGATTGCAGCTTCAACGCAATTTTCCAGCAATTTACTGGTTGTAACGCTGCC  
ATATACTACTCTACTGTATTATTCAACAAAACAATTAATTAAGACTATAGATTATCAATGAT  
CATAGGTGGGGTCTTCGCAACAATCTACGCCTTATCTACTATTGGTTTCATTTTTTCTAATTG  
AAAAGCTAGGTAGACGTAAGCTGTTTTTATTAGGTGCCACAGGTCAAGCAGTTTCATTCACA  
ATTACATTTGCATGCTTGGTCAAAGAAAATAAAGAAAACGCAAGAGGTGCTGCCGTCGGCTT  
ATTTTTGTTTCATTACATTCTTTGGTTTGTCTTTGCTATCATTACCATGGATATACCCACCAG  
AAATTGCATCAATGAAAGTTCGTGCATCAACAAACGCTTCTCCACATGTACTAATTGGTTG  
TGTAACTTTTGCGGTTGTTCATGTTACCCCAATATTTATTGGACAGTCCGGTTGGGGTTGCTA  
CTTATTTTTTGTGTTATGAATTATTTATACATTCCAGTTATCTTCTTTTCTACCCTGAAA  
CCGCCGAAGAAGTTTGGAGGAAATCGACATCATCTTTGCTAAAGCATAACGAGGATGGCACT  
CAACCATGGAGAGTTGCTAACCATTTGCCCAAGTTATCCCTACAAGAAGTCGAAGATCATGC  
CAATGCATTGGGCTCTTATGACGACGAAATGGAAAAAGAGGACTTTGGTGAAGATAGAGTAG  
AAGACACCTATAACCAAAATTAACGGCGATAATTCGTCTAGTTCTTCAAACATCAAAAATGAA  
GATACAGTGAACGATAAAGCAAATTTTGGAGGGTTGA

>YJL167W 0.79 Cold

ATGGCTTCAGAAAAGAAATTAGGAGAGAGAGATTCTTGAACGTTTTCCCTAAATTAGTAGA  
GGAATTGAACGCATCGCTTTTGGCTTACGGTATGCCTAAGGAAGCATGTGACTGGTATGCC  
ACTCATTGAACTACAACACTCCAGGCGGTAAGCTAAATAGAGGTTTGTCCGTTGTGGACACG  
TATGCTATTCTCTCAACAAGACCGTTGAACAATTTGGGGCAAGAAGAATACGAAAAGGTTGC  
CATTCTAGGTTGGTGCATTGAGTTGTTGCAGGCTTACTTCTTGGTTCGCCGATGATATGATGG  
ACAAGTCCATTACCAGAAGAGGCCAACCATGTTGGTACAAGGTTCCCTGAAGTTGGGGAAATT  
GCCATCAATGACGCATTCATGTTAGAGGCTGCTATCTACAAGCTTTTTGAAATCTCACTTCAG

AAACGAAAAATACTACATAGATATCACCGAATTGTTCCATGAGGTCACCTTCCAAACCGAAT  
 TGGGCCAATTGATGGACTTAATCACTGCACCTGAAGACAAAGTCGACTTGAGTAAGTCTCC  
 CTAAGAAGCACTCCTTCATAGTTACTTTCAAGACTGCTTACTATTCTTTCTACTTGGCTGT  
 CGCATTGGCCATGTACGTTGCCGGTATCACGGATGAAAAGGATTTGAAACAAGCCAGAGATG  
 TCTTGATTCCATTGGGTGAATACTTCCAAATTCAGATGACTACTTAGACTGCTTCGGTACC  
 CCAGAACAGATCGGTAAGATCGGTACAGATATCCAAGATAACAAATGTTCTTGGGTAATCAA  
 CAAGGCATTGGAACCTGCTCCGCAGAACAAAGAAAGACTTTAGACGAAAATTACGGTAAGA  
 AGGACTCAGTCGCAGAAGCCAAATGCAAAAAGATTTTCAATGACTTGAAAATTGAACAGCTA  
 TACCACGAATATGAAGAGTCTATTGCCAAGGATTTGAAGGCCAAAATTTCTCAGGTGATGA  
 GTCTCGTGGCTTCAAAGCTGATGTCTTAACTGCGTTCTTGAACAAAGTTTACAAGAGAAGCA  
 AATAG

>YGL196W 0.8 Cold

ATGAGCGATGTTCTATCTCAATATAAAGGGTGCTCAGTCAGAGATTTACCCACACCCAATTT  
 CGTTATTAATGAAGAAAAATTTGATAAGAAATGTACGACAATGTTGAACAACGTTGAAAAGC  
 TCAGCCAGGAATGTGGCGTACCAATCAAATTTTCGTGCACACGTAAAAACGCATAAGACAGCA  
 AAGGGAACTTTGAAACAATTGGGCCACGGACTTCCATTGGCTAAACGCACTACAAGAGCCAT  
 ATTAGTATCAACTTTGAAAGAAGCAGAAGAATTTCTTAATTATCAAGATAGACAATGTTCCG  
 ATTATATTGACGATATAACATATAGTTTACCCGTGTTGCGTTCCAGAGTTTATTCCTCTTTTG  
 AGCAATTTGTCAAGAAGGGTGAATAATTTTCAGTTTTTTGTTGATAACATTGAACACTTGGGA  
 GAATTTAAAGAATTTTCGGTAGGCCTGCTTCCGGCAAGAAATGGTCGGTTTTTATCAAGGTTG  
 ATATGGGGACTAAGAGGGCAGGTCTTGCTTTCGACTCTCCAGAATTTTTGAGTCTTTTTAAAA  
 AAAGTACTTCCCTCAGAAATTAAGAAGTAAATGAGCCATATGGGTTTTATGCTCATGCCGG  
 ACACAGCTACTCTTCAACCTCGATCAACGACACTCAGAATCTTTTGGATGGAAGAAGTGAAG  
 CAGTCAATTTGCGCTAAAGTTTTGTGCTCTGTGGATCCTCAGTTTGATCCTTCTAAATTA  
 ACATTTCTGTGGGCGCTACTCCGACTTCCAATTTCTTTGAAACTCGATAATAAAGTACCCT  
 TGTAAATTCATTACTACTCAATTAGTTAGTACGCTTGAATCCACTGCGGTAATTAAGTCA  
 TGTATGACCTGCAACAGGTGGCAACAGGCTGTGTCCAAGATCACGAATGTTCTGGTTTTGTA  
 TTAGGAACAGTACTATCATCTTACCCTTCTAGAGGTGAATGTTGAGTAATACAGGTGTAAT  
 GTGTCTAACGCGAGAAGCATCCTCAATAAAGGGTTTTGGAATATGTGCTGATTTGGAACATG  
 TGTAAATCCGAGAGTTTCAGTAGGGAATGGTATGTAGCAAGGGTCTCTCAAGAACACGGG  
 ATACTGAGGCCAATAAGAACTGGAACGAAACTACTCCATTAATAAATTAGGCAGCAAAATTC  
 CGTCTTCCCTCAACACGCTTGTATCACAATGGGACAATTTCCATATTATTTTCGTGGTAAACA  
 GCGAAGGCATTGTCAACGATGTTTGGTTACCTTTTCAGAAATGGTAA

>YHR076W 0.72 Cold

ATGTTTGCAAACGTTGGATTTAGAATTTGAGGGTCTCGAGAGGTCCCCTTTATGGATCCTG  
 CAGTCAAATCATCAGCTTTTCCAAGAGGACTTTTTACTCAAGTGCCAAGAGTGGGTATCAAT  
 CGAACAAACAGTCATGGTGATGCGTATAGTTCAGGTAGCCAATCAGGCCGTTTACCTATAAA  
 ACCGCGGTAGCTTTCCAACCAAAGACAGAGACGATCTGATATACCAAAAATAAAGGATTC  
 TATTAGATCACCTACAGGAGAAGACAATAATTTGTTACATCAAACAACGTTTACGATATTT  
 TTGCCGGTGTGCGAGACGGTGTGGAGGATGGGCTGAGCATGGGTATGACTCCAGCGCCATC  
 TCAAGAGAATTGTGTAATAAATAAGGACGAAATAAGCACTGCTTTAGCAGAAAATTCATCCAA  
 AGAACGCTTTTAAACGCCAAAGAAAATTTATGGTGCTGCATACGCAAAAATTAGGGATGAGA  
 AAGTAGTGAAGGTTGGTGGGACAACAGCCATTTGTGGCTCACTTCCCATCTAATGGAAAATTG  
 GAAGTTGCCAACTTGGGTGATTTCTTGGTGTGGAGTCTTTCAGAGATTCTAACTTGTATTTCA  
 GACAAAGTTTCAAAGTGTGGATTTAATGCTCCTTACCAATTTGTCAATCATTTCCAGAAGAAA  
 TGTTGAAAGAGGCCGAAAGAAGGGGTAGCAAGTATATTTTAAACACCCCAGAGACGCTGAT  
 GAATATAGCTTCCAATTTGAAAAAAAAGGATATTTATTATATTGGCTACCGATGGTGTAAACCGA  
 TAATATTGCCACAGATGATATTGAGCTTTTCTGAAGGATAACGCTGCGAGAACAACGATG  
 AGTTACAGCTATTATCCAGAAGTTTGTGGACAATGTTGTGTCAGTTTAAAGCAAGGACCCCAAT  
 TACCCAGTGTTTTTCGCGAAGAGATTTCTAAGCTAACTGGCAAAAATAACAGCGGTGGTAA  
 AGAAGACGATATAACTGTTGTGTCGTGAGAGTTGACTAA

>YNR025C 0.8 Cold

ATGACAAATACGAAAAAATACTACACAATGCTTTATATTATGTTCTCATTATTATATACGA  
 ATACGTAATCTGCTGGTGCATTTGTCTGCGCTACTTTTTTGAATTTCTATTTTTATTTTTAC

CATTATGGTTGGTCTTTTTCTTTTTGATGCTATCCTTAAATAATTTATCTAGGTCATATTCATCCTCTCCATCGTCTTGGCTCCCTGTAAATTCCTTATCCTTAGCATCCCTTTTCTCGTCTTCAATTTGTTTCGCTTCATCAAACCTTCTCTTCTGGAACCCTATCATCAGAATTATCGCCAAAGGTTTTTCTCCACTTATCACACCCTCAGGTTTTTCGCAGTTCACTGTAA

>YNL188W 0.81 Cold

ATGAATGTAACCTCTCCAAAAGATGGGAATCACAGTTTCTCGAAGAAAAATAGATTTAATACAAATAAACCGCGATTCCACAAAATAAATGAGCAGGCGCAGAGTATAAATTTACCAGAAGACCGTGATTCAATTGTTTCAAGTAATACAACGTCAATTATGACAGATGATGCATTTGATTACAATGAGGGCATTGCATCGCGTACCAAAAATATTAATTCTGATAGTGATAGAAGCAATGATACCATAAAACAAAACAATAAATAAAGGGAGACCGGATATAACCCTTTCTACAATGGATCAGGGATCAATCAGCGATATACACAGTTTCGAAAAAGAGAGTTTGAACCAACTTGCAGAAAAACAAAGCCGAAGAGTACATATCGGACGAAGATAATGTAAAAATTGATGAAGATAATATAGAGAACGAACTCCAGTTTACGCCGAAAATTAAGAGGGCTAGTATACTCCGATCTAGTTTACTAGGACAAAGAAATGTTTTAAATACTCGGAATCCAAAATCAAAGAATCACACATTAAGTAAAACCCATCATCAATAACAAGAGCTCCTCACAAAAGAAAATCTAGTGCAGCACTTCGGAAACAATTAGGAAAACCCCTACCGCTGCCGTATTTGAATAGCCCTAATAGTGATAGTACACCCACATTACAGAGAAAAGAAGAAGTATTCACAGACGAAGTGCTTCAAAAAAGAGAGAATTGATTGAGTCTAAATGGCATAGACTTCTCTTTCATGACAAAAAATGGTGGAAAAAAGCTAGAAAAGTTTAAGAGAATACGAAAGGAAAAGAATGCCTCCACGAGGAACTGATGTTTCTAGCTCTGAGCAGGACAATTTCTTCAAAAATATCGACGCCAACAAAATCGTATGTTTCTTTGGAGCAAAAACCCTTACCAAATCTCTCTGCTATGAATAACTTTAATGATGTTACCGACAATAAGGAGAAAGAAGAAACGAACAATAATATAATAAGTTCCAAGCGCAACGAGATCCATTACAAATACTACAGTCTGAGATCGAAAATGCTATACTAAGAACTTGACACGATAATAGAGTTACTAAAAGACGATACCGATTCAAAGGAAAAAGGAAAGTAGTGACTAATGACAACGCAGCGCTGAACAAAATGGTCAACAAAGGATGGCGGAAAACGTGATGATGATCTACAAAAAATCAGGAAATATTATGAAAAAGTATAGGGAATATTTCTTATGGACAATTTGTATTTTAATATTGTTATATTGCAATATATATGTGTATTATAGGTTTTAA

>YOL002C 0.81 Cold

ATGTCAACTTTATTAGAAAGGACTAAGAGTGTGCAAGAGCTGAAGAAGAGAGCTGCAGGGAAACATCCGCAATCCCGCAGAGGTCGCTAAAGCTAAAAAAGTACTAAGAAGGCTATATAGTTGGGATGAAATTCGGGAATGGCAAAGAGACAATGATTTTATTTTACATGGATACGTGAAAGAACTAGTAGCTTCATTGAAACTTTTAAAAGTTTGTTTTATTTGCATAATGAAAGTGTCAATATTTATTCACATTTAATTCCTGCTCTCGGGTCTTCACTGTACTGTTGCTAGATAAAATCTACTATCAAAGTGTTTGCAACAACCTACATGGCTAGATCATATGGTAATCGACCTCTTTTATTTCGGGGCGTTCATGTTTAAATATTGAGTAGCTCCTTTCATTGTCTAAAGAGTCACTCCTAAGAATTGCTACCTTAGGAAATAAGTTGGACTACCTTGGTATTTGTATATTGATTGTTACGTCAATGGTCAGTATTTTGTACTACGGCTATTTTGGAAAATTTTCCCTATTTTGCCTATTTGCGCTTATTACCGTTAGCTTTGGGATCGCGTGTAGTATTGTGTCATAAAAGATAAGTTTCGGAAAAGAGAGTGGAGACCTTACAGAGCTGGGCTATTTGTTGTTTTGGTTTATCCTCAATTAATCCAAATATTCAGCGCCTTACTGCTATAGTTTTTTCAGAAAATTTGGACCCAAATTCAGCTCTTTTGGGTTACTTTGGGGGTGTCCTATATATAAATTGGCGCTGTTCTTTATGGAATGCGGTTTCTGAAAAATTTGCCCGGTAATTTGATATTTGGGGTCATTCTCACCAACTTTTCCATTTTCTAGTTGTTATTTGCCGCATTTGTGCCACTTGAGAGGTTTATTAATAAGTTATGAGTTAGTCCATATAAAGATGGAGAACGGGATTGTCTCCTAG

>YEL070W 0.76 Cold

ATGACAAAATCAGACGAAACAACAGCTACCAGCTTGAATGCTAAAACCTCTAAAGAGTTTTGATCAACTCTTCCAATACCAACTTACCCAAGAGAAGGTGTAAACAAGGTATTGTTTCATCTGGGAGTCCGGTGCATTCACCGTTCCATTTAGCTGTTTTTTCATGCACCGTCTGATGCAGGAGCACACTTAAAGGACTGGTCCATATGTGGTGTGGTTAATGAAGGCAGATGCACTTATGCGCGATGCCATGAAGGCCCAAGATTGCCATACACCCCTTGTGGAGCGTGGTATCAAGGACACTAACGCTTATATCGTCCGGTTCCATTACTGCTTACATGTACGCTCCCGATGATCCAAGAGCTGTTATTGAAAAGATGGCCAATCCAGACACACATTTGTTTCTTTGACGGTCCAGAAAACGGTTACTACACAGTGAAGCAACAACCTCCTTAATGACAGATGCTCCCGAGATTATCAATGATTTGAACCACCCAGAAAAGCCAGATACTCTGTATGGGTACCTATATGAAGCCCTGTGTTGCGTTACAAGAGAGTCTTACCCCATTCACTATTATGTCATGTGACAACATGCCCAAAAATGGTGTACAGT

AAAGACCATGCTTGTTCATTTGCCAAGTTAAAGAAGGATGAGAAATTCGCCGCCTGGATTG  
AAGACAAGGTTACTTCTCCTAACAGCATGGTGGACCGTGTGACCCACGTTGTACCGATAAA  
GAGCGTAAATACGTTGCTGACACCTGGGGAATCAAAGATCAATGTCCCGTTGTGCGAGAACC  
TTTCATCCAATGGGTTCTTGAAGACAACCTCTCCGATGGCCGTCCTCCATGGGAACTTGTG  
GTGTTTCAGGTCGTCAGGATGTCGATTCTACGAATTGATGAAGTTGCGTCTACTTAACGGT  
GGACATTCTGCTATGGGATATTTGGGATACTTGGCAGGCTACACCTATATACATGAGGTTGT  
CAACGACCCAACATCAACAAGTATATCCGTGTTTTGATGCGTGAGGAAGTTATCCCATTAT  
TGCTTAAAGTGCCAGGTGTTGATTTTCAAGAGTACACTGCATCAGTGTGGAAAGATTCTCC  
AATCCAGCAATTCAGGACACTGTCGCACGATTTTGTGTTGATGGGCTCTGGTAAGATGCCATA  
GTATGTTTTGCCATCAATTTACGAGCAGTTGCGTAAACCAGATGGTAAGTACAAGTTGTTGG  
CAGTATGTGTTGCTGGCTGGTTCGGTTACCTGACTGGTGTAGACATGAATGGGAAGCCATTC  
GAAATCGAGGATCCTATGGCACCAACCTTGAAGGCAGCCGAGTTAAGGGCGGTAAAGATCC  
TCACGAACTGCTTAAACATTGAGGTGCTTTTTAGTCTGAGATTCTGTGACAACAAAGAATTCG  
TTGCACAATTGACCCACTCCCTAGAAACAGTTTACGATAAAGGGCCAATTGCCGCTATTAAG  
GAAATTTTAGACCAAGTGTGA

>YLR382C 0.75 Cold

ATGCTGTCTCGACCTTCAAGCCGATTCTATCCACTAAAAGGGGCCCTGGACCTGCAGTGAA  
AAAATTAATTGCAATTGGGGAGAAATGGAAACAGAAGACAACCCGTGGCTTGCCTAAGCAGG  
ATACTCTGAATAGCGGGTCGAAATATATTCTGTGCCAGTTTCCATATCCTTCTGGGGCGCTT  
CACATAGGACATCTCCGAGTTTATGTCATTAGCGACTCTTTGAATAGATTTTACAAAACAAA  
AGGGTACAACGTGATACATCCGATGGGATGGGATGCTTTTGGGTTACCTGCCGAGAACGCTG  
CTATAGAAAAGAAGCATTAAATCCGGCCATATGGACTAGGGACAATATTGCAAAAATGAAACAA  
CAAAATGCAAAGTATGCTGGCAAATTTTGGATTGGGACAGAGAAATAACTACATGTGATCCCGA  
ATACTATAAATTCACCCAATGGATTTTCTTAAAACCTTTTTGAAAATGGCTTAGCTTATCGTA  
AAGAAGCAGAAATTAATTGGGATCCCGTTGATATGACAGTTTTGGCTAATGAACAAGTGGAT  
GCCAGGGCCGTTCTTGAGATCAGGGGCTATTTGTGGAAAAGAAGCAGCTAAAACAGTGGTT  
TTTGGGAATAACGAAATTCGCTCCTAAATTTGAAAAGCACTTGAACCAACTGAAGGACTGGC  
CTTCCAACGTGAAGCAAATGCAAAAAAATTGGATAGGCGAATCTGTGGGTGCAGAATTAGTG  
TTCAAAGTTGCGGACCCCAAATTTGAAAACCTGATTGTCTTTACAACAAGACCCGAAACTCT  
TTTTGCTGTACAGTATGTTGCTCTCGCATTAGACCACCCAATTGTACAAAAATACTGCGAGG  
AAATGCCGGATTTAAAAGAGTTTATACAGAAAAGTGATCAATTACCAAACGATACGAAGGAA  
GGATTTTCAGTTACCTAACATAAAGGCCGTAATCCCTTAACTAAAGAGGAAGTCCCCATATT  
TGCAGCTCCATATGTGGTCAGCAGCTATGGTTTCAGCACCTAGTGCAGTAATGGGTTGTCCAG  
GACACGATAACCGAGATTTTGGAGTTTTGGCAAACAAATTTGCTCCTGGTGAACATATCAAGACG  
TGCATAGCACCTTTTTTTGACGATGCTTCAAAAAGTAACCTGAACAGGAAAGACAAAGAATAAT  
TGATACTGTCCCGTTACATCTACTGACGGTGTCTAACCAAAGAATGCGGAGAACACTCAG  
GAGTTCTCACTGTAGTGGAAGGAAATCGATAATGGGGATGTTGAATAGCGAAGGACTGTCT  
AAGAGCGTCGTTAGATACAAAATTAGAGATTGGCTGATAAGTAGACAAAGATACTGGGGTAC  
TCCAATACCCATCATTCACTGCGACAACCTGTGGACCTGTCCCGTTCCAGAAAGTGATCTAC  
CTGTCAAGCTACCAGAACCTGAAGGCTTGGATACAAAAGGGAATCCGCTGTCCACAATCGAT  
GAATTTGTAATGTGCGCCTGTCTTTCATGCGGGAGCCCTGCGAAAAGAGAAAACCTGACACCAT  
GGATACTTTTATCGATAGTTCTTGGTATTATTTTCAGATTCTTGGATCCCAAAAACACTTCAA  
AACCATTTGATCGTGAATTTGCAAGTAAAAATATGCCGGTTGATATTTATATTGGTGGAGTA  
GAACATGCTATCTTACACTTGTATACTCAAGGTTTATTGCTAAATTTCTCGGATCTATCAA  
TGCATGGAGCGACCCCTGCTGGCATCTTCAACCAATTCAAAAAACTGGTGACACAAGGAATGG  
TTCAAGGGAAAACCTATGTTGACCCCGATTCTGGTAAATTTTTGAAGCCTGACGAGTTAAC  
TTTGTAAATGACTCTCCAGATGGCAACACAGTGATTATTTAAATCAAATGGCAAGGTTCCGGT  
AGTCTCTTATGAAAAATGTGCAAATCTAAATACAATGGTGCAGATCCAAATGAATGTATTT  
TAAGACATGGACCTGATGCTACGAGAGCACATATCCTCTTCCAAAGTCCAATTCAGATGCC  
CTGAATTTGGGATGAATCCAAGATTGTTGGTATAGAACGTTGGTTGCAGAAGGTTCTTCATTT  
GACCAAAAATATTTCTCAGTCTCGAGAAGGATTTGGCAATAAGTAAAGACTACAAGACCCCGA  
CCGACTTAAATGATGCAGAAGTGAATTTTACAACGATTTCCAACGCTTCTTGAATCAATT  
ACGGAATCATTGAAAGTTAATCTATCGTTAAACACTGTAATATCTGATTATATGAAGCTAAC  
CAATATTTTAGAAAGTGCATTGAAAAAAGGTGAAGTAAGGAATGAAATGATAGTACAGAATT  
TACAAAAGTTGGTAACCGTTATATATCCTGCTGTCCCGTCAATTTTCAAGAAGCTGCAGAG  
ATGATCAACTCCCAAATGGAATGGAACCAATACCGCTGGCCAGAAGTTGAGCGCACTACTGA

GTCCAAATTCAAAAAGTTTCAAATTGTGGTAAATGGCAGAGTCAAATTCATGTACACGGCTG  
 AAAAAACTTTTTGAAATTAGGTAGGGATGCTGTTATTGAACTTTGATGAACTTACCGGAA  
 GGGAGAATGTATTTGATGAATAAAAAAATCAAATAATTTGTCATGAAATTCATGTGATTAG  
 TTTCTTATTCCACAAGTAA

>YDR105C 0.81 Cold

ATGGGTGCCGTAATTTCTTTGCCAGTTAGCATGGCGGGCTCATTCGTGGCGTCCTGTTTTGG  
 AGGTTGCTGCTCAAACCTGGTACTAAGACTGCATCTTCCCTAGGATCTTCTTCTTTAGGGA  
 CAAGACTTCTGTACGCCGTTTGGCTTTTACTTAACTCATTGATATCATGGGTGTCCTATTCT  
 GCGAACAAATCAATCCTATGGCCAGGGAAGACATGTACTGGGACTGGGGAATGTGGATTTTT  
 TACAGTTCATAGGTTGAATTTTGCATTGGGATGCTTACATTTGATATTGGCGCTTGACTAA  
 CGGGCGTAAAGTCGACTAATGACGTAAGAGCAGCATTACAGAATTCGTGGTGGAGTTTAAAA  
 TTTATACTGTATTTATGTCTCATTGTTTTGTCATTTGTCATCCCAATGACTTTTATATTTT  
 CTTTTCCAAGTGGGTGTGAGTCCCTAGTGGAGCAATTTTCATCCTGGTTGGGCTTATATTTAT  
 TAGTAGACTTCGCTCATGAGTGGGCTGAAACGTGTATTAGTCACGTTGAGTCAGAAGATGAA  
 GATTCCTCATTCTGGCAACGATTTTTGGTTTTAGGGACAACTTCAATGTATACCGCATCGAT  
 TATCATGACTGTTGTTATGTATGTTATGTTTTGTCATCAACAATGTAACATGAATCAAACAG  
 CGGTAACAGTCAATTTAATATTAAGTGTATAACGCTTGTCTTATCGGTGAATCCTAAGATC  
 CAAGAGGCCAACCCATAAAGTGGGCTGGCCCAAAGTAGTATGGTTTTCTGTTTACTGTACTTA  
 TTTGACAATGAGTGCCATGTCTTCCGAACCGGATGACAAAAATGTGTAATCCGTTGGTTAGAT  
 CTAGTGGAAACCCGTAAGTTTAGTATCATTTTGGGCTCTTTATTTACTTTTATTGCGATTGCT  
 TACACCACAACCTAGAGCCGCTGCTAATAGTGCTTTTTCAAGGCACCAATACTAATGGTGTCTAT  
 ATATCTCGGGAATGATATCGAGTACGAAGGACTAGGTGGACAGACAAGAAATCAGTTGAGGT  
 ATGAAGCTATTAACAAGCTGTAGAAGAAGGATCTTTACCGGAAAGTGCTTATATGATACC  
 GCTTGGTTAGGGACATCATCTCCTACAGGCGCAATGGATAACCAAATGATGATGAAAGGAC  
 TGGAACCAAGTACAATTACACTCTGTTCCACGTTATATTTCTTTCTGGCAACCCAGTGGATTG  
 CAATTTTACTAACAATAAACGTTACCCAGGATGATGTAGGTGATTTTATACCCGTAGGAAGA  
 ACATATTTTTTATTCTTGGGTAAAAATAGTTAGTGCATGGATATGTTATGCCCTTTACGGTTG  
 GACAGTGGTAGCCCCAGCGATTATGCCCGATAGATTTGATTACGAGAATTACTATTAA

>YCR023C 0.77 Cold

ATGGCGCGTCAAAGCTTACTTTCAAAGAACAATGGATGGTTTTCCCTGGGTCCAACCTTGT  
 TGTGTGTCTCCTTAGTTAGGTTTCAGCGAACCAATTGCGTTTTCGTCACTATTTCCCTTATGTTT  
 ATTTTCATGGTTAGAGATTTTAATATTGCTCCCAATGATGCTCAAGTGTCCAATATTCAGGT  
 TATTTATCTTCATCATTGCGTTATGCCAAGTCATATCTGCGTACCCTGGGGTAGATTCTC  
 TGAAGAAGCATGGCAGAAAAATAACATTGACTTGCAGGCTTATAGGAACATCTGTATCATTGT  
 TAATACTGGGATTTTTCACGCAATTTCTATCAGGCTTTGGTGGCAAGAAGTTAATGGGATTG  
 CTAATGGTAACGTCGGCGTTATTAGAACCATTATTGGTGAATAGCAACTGAAAGAAAACA  
 TCAGGCTTTAGCTTTCAGTACTATGCCTTTATTTCAATTTGGTGGCGTTGTTGGGCCTA  
 TGATCGGTGGGTTTCTTGTATTTAGAGATGGAACAATGAATGAAGTGCCACTATGGTTTCCA  
 CATTTTGCAAAAAGAATAATTAGGTCATATCCGTACGCCCTGCCAAACGTGGTAGTGTGCAT  
 GTTTTTGATGTTGGTTTTAACTAATGCAACATTGTTTTTGGAAAGAAACACATCCTGCTTTTA  
 AAGATAGAAGAGATTACGGTTTAGAGGTCGGTGATTTTATTAAGAAGAATATATTTGGTATA  
 CAGCCGAAAAGAAGACCCTGGCAAAGCGCATTCAGGATGATTCGGAACATTACACCACCG  
 TAATGAGAATGTGAACAGCATTCGAGGACAAGATAGTGAAGAGGATGAAAATAGTCCCTTAG  
 TGAATACTACCAATGACGATGATACTGAAAGCATAACAATCGATTGATCCTATTTTAAACAAGA  
 AGACAGTCTGTAGGCCTGATTAGGACATATCTCTGCATGAACCAACAGACGCTGTGCATGC  
 CAATATAGATACAGCTCCAGACGGTTGTAAAGAAAGTAGTATATTTTCATCACGTTTTTCATA  
 CAAAAGTATTTTACCCTATATCGGTGAATTTTATTATGGCTTTACATTTGATTGTATACAAC  
 GAATTTTTGCCTGTTTTTTTTAGCTTATGATTTAGCCGTAGATCCAGAAAATCCAAAGAAGCT  
 GGCTTCAAATTTCCGTGGAAAATATCTGGCGGTATAGGTTATGAACCAGAACAAACCGGTA  
 CTCTTTTGTGCAACAGGTATCTTTGGTTGTTTTGTGGTTATTTTCATTTTTCCCATAGTT  
 GATCGAAATTTTCGATTGTTTAAACAATTTTTCAGAACTTTAGTCAAGCTGTACCCTATTATGTA  
 CGTTATGGTTCCCTACGTTGTTTTTCTACAGAATGAACGGATTCCCTAGCTGGTATACTGTGCG  
 TCTACTTGTACATAATCACAGGGATAAAAAACATTTTGTGGCGCTTTAACGTCACCACAAATT  
 ATGTTATTAATTCATAATTCGAGTCCCTTGAGTTGTAGATCAGTCATCAATGGCGCCACCAT  
 TAGTATTTCTGCCTCTGCTCGTTTCATAGGTCCCTTAGTATGGGGCTATATTATGTCTTGGT

CCCAGCAAATGACGTCGCCTGGGTCAGTTGGTGGTCGTTAAGTCTTTTTTGTATGGTAGCT  
 CTTTATCAAAGTTATAAGATAGCACCAATTGATGATAACGAAAATGAGCTTCATGGACAGGG  
 TAGTGAAGATGCCTACAATTCGCAGTCACAGTCTTCTGATTTAAGAATGGCTCATCGATCTA  
 GTTTAAGCAGCTTAAGTAACCAACGCTGTACCACATGA

>YIR033W 0.81 Cold

ATGCAGCAGAACAGTGAGTTCCTAACGGAAACACCTGGAAGCGACCCTCATATATCTCAATT  
 GCACGCGAATAGCGTAATGGAATCACAGCTCTTGGACGATTCCTCCTGAACGGGTCTCCCA  
 TGTACCAGGATGATAGCATGGCGCATATTAATATTGATGAGGGTGCTAATTTCCAAAATTTT  
 ATCAAGACAGATGAGGGTGATTCGCCAACCTGTTGTCTTTCGAAGGTATCGGTAACAATAC  
 TCATGTCAACCAAAACGTGTCCACTCCACTGGAGGAGGAAAATGGAAAGTAACAGAGCCTTGA  
 AGGAGGAAGAAGAGGACGAGCATGAAAATAAGGTTTTTAATGAAAAAATATAGGCAACCCT  
 GCTCATGACGAGATTGTATTTGGAAGAAAGGAGACGATTCAATCTGTTTACATAAATCCTTT  
 AGATTACCTTAAAGTGAACGCAGCGCAGCTACCTTTGGATGTAGAGGTCTCAGGTTTGCCAC  
 AAGTATCTAGAGTGGAAAATCAACTGAAACTGAAAGTGGAAAATTACGTCTGAAACACCACTA  
 AACCAAGCATGCTTTACTTGCCTAGCGATTCCATTTCAAGAGAAAAGTTTTATTTAAAAAA  
 AAATATCGAGGATTTTTTCAGAAGACTTCAAGAAAAATCTTCTGTACATCAATGCGTTTGTTC  
 TATGTGCGGTGAGCAACAGAACGACAAATGTTTGTACCAAGTGTGTTAAGCGAGAACAAAGA  
 AGAGCCGCTAGAAGGAAATCAGGTATTGCAGACAATTTACTCTGGTGTAAATAATATTAATAG  
 AAGGTTAGTTCGTGTTCAATAACAACAGGTTTTCCCCATAATGAAAACCTTCGATAATGTTA  
 AGGAGTTTGAATTAACCTACCAGGCTAGTTTGTATTGCAGGCACCATAAGGCAAATAATGGC  
 TTTGTATATTTACTATAACAGATTGGCAAAATAGACTGTTGGGTAAGTTTACGACAAC  
 ACCTATTATGATCACGGATAGAAAACCAGCAAATATGGATACCACCAAGTTTAAATAACACTA  
 CTACCTCGTCCAGAAGGCAGCTAACGGAAGAAGAATCTACCACAGAATATTTATCAACGGAT  
 AACAAACCAATTGAGCAAAGACGAAAATATGCCATTTCAATATACTTATCAACACAACCCATA  
 TGATAATGACAGTCAAATGAATAATATTTCCACTGAAAGACAAAAACGTACCATTCCCATATT  
 CCATCTCTCAACAGACAGATTTGCTTTCAGAACAATAACTTATCACTGAACCTTTCTCTGCC  
 AATCAGCATATTTCCATCACCAACATCTATGAGCGAAGAAGGCTCAGAATCATTTAACTATCA  
 TCATCGCGATAATGACAATCCCGTCCGTACTATCTCTTTGACAAATATTGAACAACAGAGTC  
 AATTGAACCAACGAAAAGAGCAGCAATAATTTGGAATAATGACATTGGTAAACCCCTATTTC  
 AAGCATTCCTTTTCAAATTCATCAGTGCAACAAATACGATGAATCCAGCTTTACATTCAT  
 GCAAGATTTCTCAATGAAAAACAACAATAATTTGCCATCAATTAATCGCGTTATACCTT  
 CACAAGGCCCAATCAATGGTGGTATCGAAGTTACATTACTGGGTTGTAACCTCAAAGATGGT  
 CTTTCTGTAAAGTTCCGCTCTAATCTTGCCCTTTCTACGCAATGCTGGAGTGAGACCACGAT  
 CGTCACTTATCTCCCTCCCGCTGCCTACGCGGGTCAAGTTTTCTGTCTCTATTACTGATACGA  
 ATAATGAAAATAATAACGATGACCTTCCCCAAGAAATTGAGATCAATGACAATAAAAAGGCC  
 ATATTTACCTATGTTGATGATACTGATAGGCAACTGATTGAATTGGCTTTGCAAAATGTGGG  
 ATTTAAAATGAATGGTAAGTTAGAAGATGCAAGAAATATCGCGAAGAGGATTGTTGGCAATG  
 ATTCCTGATAGCGGTACAAATGGCAACAGCTGTTCAAAAAGCACAGGTCCCTCTCCAAAC  
 CAACACAGTATGAATCTGAACACAAGTGTCTTTACTCCGATGAAGTCTTGATACAAAAAGT  
 TATAAATCATTGAACATAAAATCCAATATTTCCATATGTGATTCATTAGGGAGAACCTTAT  
 TACATCTTGCCCTGTTTAAAAAATTACTCAAGCCTTGTGTATACATTGATTAAAAAGGGTGCT  
 CGTGTAAACGATATTGATTCCCTTTGGGCTAACTCCATTACATTTTGCTTGATAAGTGGTGA  
 CCTAAAATTAATTAAGATGCTTTTAAATTGTAAAGTAAATTAATCACTGAGGTCACACAACG  
 GATTAACCTGCAAGAGAAGTATTCATAGCAAACCACATTCAATCAAAGGAAATAGACAAAAAA  
 CAAGATAACAGAGACAACCATAAGTTTGTTCATAATGACACTTATATCAGCGAAGTATTGTC  
 ATTTGTTTGAAGAATTTCCAAAACGGTACGAAGTTTACCAGTAGTGTAGAAACAGACAGTAATT  
 ATCTATTAGCAGGAAATATTCACAATCCAGTTTCAATTCAGCCTGCTAGACAATGAATCT  
 TTGAATGAGAACTTATTCGAAAGCCAAAGCATGATAAATCCACTTCTATGGAGATTCAGCA  
 TCCAACCTTGCAACTATTTGAGAATTCAGTTACTCTGAGTACGACCAAAGTGATTTGGAAG  
 AAGACGGGGATGAAGATCTGTTTCGTCACTGACGAAGTAGAAAAACCAGGTGTTGCATGCAGG  
 GAGGAACAAAGCGAACTCCTTGATATTGGATCTAGCGCCAACGAACCCGAAGAGGATAATGG  
 TAGTACATCTCTTGGAAATAGAGTTTTACATCGAATTAATGATGACTTACCAAAATATGAGG  
 ATCTGTTCCCGTTGTCTTGGGGTAAAGATGATAAATGAAAACCACAAATCAAGACAGTATT  
 GTGGAGCAGTCAGCATCTAATATTGAAAACCTGAAAATTCGGAGGAAGAGGATTATGAGGA  
 AGAGGAAGAATTTTAAAAAACAGTTTAAACAGATTCTTCCAAAACAAACAAAACCTTCCGAA  
 ATGATAAATGTTAATATTTTTCTGGATACCTTAAACTACTACTTTTGACATGGTTCATC

ATGTACAAATTTGGCAACCAAGATAGTTCCATCAATCATATAAGCGAATTAATCTCAGAGTA  
 CTTGAGAATTGCATTAGCAAAGTTCTTGCTGGGAAATGAAAGGATGAAAAGTGCATTCAGGT  
 CAAAATTATCAAACCTGCAAACAACAAGAATGTTGAACGATTTAATTGTCAGTTAG

>YGR288W 0.8 Cold

ATGACTTTAACTAAGCAAACATGCGCCAAGCAGGCATGCGACTGCTGTCGTATTTCGTGAGT  
 GAAATGCGATGGTAAAAGGCCGTGTAGCAGTTGCCTACAGAATAGTTTGGATTGCACTTATC  
 TGCAACCGTCGAGAAAAAGAGGTCCGAAGTCCATTAGGTTGAGGAGCTTGAAAAGAATAGCA  
 GAAGTGCAGAGGGAAAGCGGTCCCTAACACCATGCAACTGCTCCTGTAATATATAAGAGGGT  
 TCCCAAAAAGCTAATCGATCAGTGCTTGCGGCTCTATCACGATAATTTATACGTAATCTGGC  
 CCTTCTTTTCGTACGATGACCTTCACAACTTCTGGAGGAAAAATACAATGACAATTACGTA  
 TATTGGTTTCTGACCGCTTTATCAGCGGCCACCCTCAGTGATTTACAACTGAAATAAAATC  
 TGAAGAGGAAGTCACTTTCACGGGAAAACAGTTATCTAATCTTTGCATCTCATCGTGTGAGC  
 AATTTGACGATTTGGATAACAGCAATATATTCAATATTATGACGTAATACTGTTTGCATCGT  
 AGCTTTGCACAAAATATCGAACGCAAGAATCTTACAGACTCTGTTGTGAAGCGGTGCGTCT  
 GATTACGGTAGCAGGGTTACATCGGGAAGAAAATACGGATCCCTTACATTTGAAGAACAGC  
 AACTTAGACGGAACTTTTATTACTTGTCTTCTCATGACGGAGAGATACTATGCCATATATCTT  
 CATTGTGCGACGAGCCTGGATGCCACAATAGCACCACCGCAACTTGAACTTGTAAGTATGATCC  
 TCAGCTTTCTATGGACAGTTTCTTGAATGATTAGGGTATTTACTGTACCAGGAAAAATGTT  
 TCTTCGATGCTTTAGCCGCTGACTCTACAGATGCTTCTTGCCTGAAGAGTCATTGAAAAAG  
 ATATGGAACGAACTCCACACAACCTTCTCGGAAATAGAGCCATGGTCTAACGGTTACATAGA  
 CATCTCATTTTTCCCGGCATTGGATTAGGATACTAGCATGGAAGCTAGCTTATCAAATGAGGG  
 GTAGCAACTTTTTCATTGAACGCTAACAATGGGCAAATACCAATAGAAAATGCGAGAGATATG  
 TTAATAGACACTTACTTAACCCAGAGAATCTTTACGATGTCCATGGTCCCGGGGTACCAGT  
 GAAAACATTAGAAAATAGCTACTGCTTTGGTGGACATTGTAGGCCAGTATGATCATAACATGA  
 AATTAGAAGCATGGAATGTTTTGCATGATGTATGCAAATTTGCTTTTTCTTTAAACCACTAT  
 AACAAATGATATGCTGAAGAGATTTTCCACCAAATGCCAGAATGCCCTAATTACTCTGCCCAT  
 TTCTAAACCTTTACAATTGGATGGTTATCCCAAGGATAAATGAAGACATAGACCCTTGA

>YGL247W 0.77 Cold

ATGGAACTCCGTAGTTTTTCTAGACAGCCTGATGGCATACTTGCTAACCCAAGATTGGGAAG  
 GGAGGAAGTATTGGAAGGTGAACATCCGCAAGATGCTAGATTAGCCCGACAAAGCATTTGGT  
 TGAGCCCAAGTTAATTGCGGAGTATATACAGCTTTTTTTTCAATTTTATTATAGGAACTATA  
 GGACTGTCTCTTGCTATTAATTCATTTTGGATGATAAGAAACGATGTTAACTTAAACTGGA  
 GCATAACGTGAGGGAAGAATTAGATAAAAATTGCAACTTGCAAATCAAGGTATTTTTGAAAACC  
 AGTGCGAACCTCATATGAGGGTCCAGCATTGGAGGTACGTTGCAATGAATGGTCAAATGT  
 ATGAACAAGGAAATAGTGTCTGGCTCCGATTACCAATGGGCTAAAGCATGGGCTCGTACTCT  
 GGCGGAGGTAATAAATGCTTTTTTTGAAGCGTTCAGTATACGATCTTTCCTTTTTCATTTTAA  
 TTAGCATAATAGGTATAAATATTGTTACCAATACGAGTTTCGGATCATAACAGGGTTTATCTC  
 AATAATAAAGATACAAAATCGGTTCCGCCATGCATAG

>YDR537C 0.74 Cold

ATGTTTTCAAGATGGATGGAAGATAAAGGGTTTCCCGAGTAACCAGTAGTAACCTTACGATT  
 CTCTTTAATCGAAACATCGGCAGCTCTTGTAATTAATCCTCTGTAAAACCGATTCTAATAG  
 CAGCTAGTGATTTTCATGGAACAGGGCACAACAATCATAACCATCATGCTGGAAAGATCCGGAC  
 GAAATGCATGCAGAAACATCACGAACAGAGTATGTCTTGGTTGCCAAGGCCGCCACGTCATG  
 CGGTTCCCAATCTGTTTCATATTTTCATTGTTGCTGCACCCCATTTTGAAATCACCAAATGGG  
 TTTCTACGCTCAACTCTTTTAGCACTTGTAGAAGTCTGATTTCCAGTGCAACACCAGTCGCA  
 CCAGTAATTGCGACAACAATCTCTTTGGTCTTGGAGGCGAAGTTGATGCCCTGGTTACTTC  
 CTTTGACAGTTTATGTGTAAGGAAAGATGGTGAAGTTGTAATGGTTCTACCTAGCAAAGGAA  
 AATTAGCAAAAATGCCTGTTGTTTTGAAAAGGCTATATTAGTTCTTCTTGGAAATAGGAGC  
 ATATCTACTCAATTGAAGCTGCTCAATGCGTTGGACTCCGTAGATTGA

>YHR121W 0.73 Cold

ATGAGTGTGAGCCTTGAGCAAACGCTCGGATTCAGAATAAAAGTTACGAACGTGTTGGATGT  
 AGTTACTGAAGGAAGATTGTATTCGTTCAATTCATCCAACAACACTCTTACTATCCAAACAA  
 CAAAGAAGAATCAATCTCCACAAAATTCGAAGGTGATAAAATGTACATTCATCAAGCATTTG

GAAGTCATTGGTGATAAGCCCTCGTTTAACTCATTCAAAAAGCAACAAATCAAACCCTCATA  
 TGTCAACGTGGAAAGAGTTGAGAAGCTTTTCAAAGAAAGTGAATAGCATCTAAAAAGAAAG  
 AACTCTTAAGGGGCAAGGGTGTGAGTGCAGAGGGTCAGTTCATTTTCGATCAAATCTTCAAG  
 ACCATAGGAGATACTAAGTGGGTGGCTAAAGACATCATTATCTTGATGACGTTAAGGTGCA  
 ACCTCCATAACAAGTCTGAAGATATCAAAGTGTACATGAGGGAAGTAACCAATCCATTACAT  
 TAATTCAAAGAATAGTGGAAAAGCTGGGAGCAGCTAGAACAAGACGATGGTAGGAAAGGT  
 GGATAG

>YNR067C 0.77 Cold

ATGCAATTATATCTGACACTTCTTTTTCTATTAAGTTTCGTGCAATGTTTCATATATAAGTTT  
 CATATCGAATAATGCAGACGAAATATTGGAACTGATTTAATTGAACTTTATCTTACGCTA  
 CTTTGACAGTAGGTGAGCCTTATGTTGCACAATCGGTGGTTGTAACAAGAGTATCTGCAGCT  
 TCTCATAGCCCTCTCTCAGTTTCGCCAAAAAATAGAGTGAGCGCATCTCCAATTAATTCACA  
 AGACAGTGATTCTAATACAAGAACAGCAGTTCAACTGTCATTGTCTGTTATCAAACCTACGCAA  
 GCCAAGTATCTCAAAAAATAAGCGCACAAACCAATAATGATCCTGTCACTGTTTCAAATATT  
 TACGCAAATGATAATTGAAAAGCAAAAGTTCAGTACACAATTTGAGTTCGGTTTCCGGCGT  
 CGCCTCAGTCATGCCAAGTGCATCAACAATGCGTAAAGTCACCACATTATTTATCTCAAACCTG  
 CTTGCACTTTCGACTTCGACTTTATTTTTCTTCATCTTTATCTATTTCCGGGGACACAATTAAT  
 GGAACTTTATTGACTTCTGTTTCAAAGGTACAATCGATCCACTGGTAACTCAAATGCCCTTC  
 CTATTTCTTCCCAAGAAACAAAAATTATTCTTCTTCATTGACCTCGAATAAAACGATATATA  
 CTATTTTCAGTAAGGACAAATGCAGCTACAGCTACCGGCGAAGATTCCTTCATTGCTTCAACT  
 CCTGCTTCCCTCGACTTTTGTCTATCCATCCAACCTCAACCCAGGATTTAGTCCAGACGCTCGC  
 ATCTACAACAGCAAGCCCTGCTTACCCATCTAATAGGACACAAATCACTCTTTCTCCATCTG  
 TATCACTATATTCGACAACCTAGTCCAATTTACCCTTCAAACATTACAGAAAACGGTTCTTCA  
 CCATCACCATCACTATCATCGACTGTTAGTCCAGTTTATCCATCGAGTTCAACAGGAAACAT  
 TCTTTTGTTCATCACTATTTTCAACAGTAGATTCTTCTTCCCTCTCCGGTTTCTTCGACATTAG  
 ATACCATTTATGTATCTTCTTCAATGCAAGCTACCATCTCTTCGTCTCATCTTCGAGACAA  
 AAAAAACTTCTCCTCTTCTCTGTCAACCTCGACCAGTAGCACCCTACCACAACGGAGAA  
 CTCTTCAACAACGACCATTGTCAATCTTTTCAATGCTGTTTCGACAGATGAACCACCAACTG  
 TTTTTCGACAGATCACCAATCCTATGTTCATTGGCTGATGGGGTGTCAAACGATGGTCCCATT  
 CAAACAAACAAGTTTTATACAATTTGATTGTTGGTAGTCAGGAATCACCTGCCTTTGTGTA  
 TCCTTATTCAATTGTGGAAGTACACCTCGAGTTCATATGGTTTTGCTGTTCAACATACAACAG  
 TAGATCAATATAGCTACGGTGGTTATGACAGTTCGGGTAATGCAGAATATTTGGTCAATCCT  
 TTGGGAATTGCTCATGTTGTTTTCTCAGCTTCGAATTTTGATTCAAGTATGACTATGCAAGT  
 TGATGAAATGACCTTGTCTTCAACAAGGGTAGTGTATCAGAATCCAATGATTCTTCGAACT  
 ACCTGGAAATACCTTTGGTTCAAGGTATGGGATTTGCAACTGGTATATATCATGGATCTTTA  
 AATGCCAAGATTGGTTCCAGCGTCGGATTCAATACCATTGTTTCTGAATCATCAAGCAATTT  
 AGCTCAGGGTATTCTCAAATATCGTATCACCTTTTTGAATGGAGTCACTTGTTTATGTTACG  
 TGATAGGACCAGACGATTTAACCTCAACGGACTTTTTCAATTGGAGGTGAGCTCAGAATATGAA  
 ATTAAGCAAGCGCTAGTGTGATGGTCTTATCATTCAATGGCCGTCGCACCTTCTGAAAC  
 TGATTACGAGGTCTTTTATGATCAAGCCGACGGTATGTACGTTACTAATTTCAAGCTGCAGG  
 GTGTCTCTGACGGTTCTACAGCTACCTATGAATTTTCTTATACCACCCAAGGTGAGTCGGCA  
 TCAGGTAGCACAATGATTTTTGCCTTGCCCCATCATGAATCTTCATTTAGTGATATAATGCA  
 AGACTACTATAACGGCATTCAACTCGCTTCTACAACCTAAGGGTGTAAATGAACGGTTATCTAA  
 CAACGAGCCTACAATTTTCCACATCTCTAAACAGACAAAATATCTTGGTTACCATGGTCTTCT  
 CAACTTGGCTCAAACCTTTTAGAGTATTCTAAAGAACAATGCAATTATTAGCTGAAGTTGC  
 CAATTCCGAATTACAGGTTAGTATTTCCGAAAGTATAAGCGGGTTAAACACATATTATTTGG  
 GTAAAGTTATCGATAAGTATTCTTACATTCTATTAACGGTCTCCGAAATCATCCAAGATGAA  
 GCCAGTACTAAGAGTACTTTGGAAAACATCAAATCGGCCTTTGATATTCTGCTACAAAATGA  
 ACAGACGTATCCACTAATTTACGACACAAAGTTCAAACGGTTTGGTTCAGTTCAGGAGATTGGG  
 GTTCCACCAGCACGCAATACGATTTTGGTAAACCTTATTACAATGACCATCATTTCCATTAT  
 GGTTACATTATTCATGCAGCTGCTGTTCATCGGCTATGTTGACTCTAAACTGAATGGTACTTG  
 GGCTGCCGACAATAAAGATTGGGTCAATTCATTGGTAAGAGATGTCGCAAATCCATCTGAAA  
 AAGATGAATACTTTGCACAATCGAGAATGTTTGGATTGGTTCAAACGGTCATTCATGGGCAGCT  
 GGACTTTATGAAAACGGTAACGGTAAGAACGAAGAAAGTAGTAGTGAAGATTACAATTTTGC  
 CTATGCTATGAAGTTATGGGGGGCCACTATCGGTGACCAGTCAATGGAATGAGGGGTGACT  
 TGATGATTAGTATAATGAAGGATGCAATGAACGACTATTTCTATTATCAAATGACAACACA



GTTGAGCCTGAAGAAATCATAGGAAATAAAGTGAGTGGTATTTTATTTCGATAATATTATCGA  
 TTATACTACTTATTTTGGAAACAAACACAGAATATATCCACGGTATTCATATGCTACCTATCA  
 CACCAGTTTCTTCTAATATTCGTTCTGAGACTTTCGTCGAAGAAGAATGGCAGACTAAAATC  
 GAGCCAATTATTGAATCGATAGAAAGCGGCTGGACAGGCATATTGAAGCTGAATCAAGCACT  
 CTTGACCCAGTAGATTTCGTATGCATTTTTTCAGTGATTCAACTTTTGATTCATCCACATATT  
 TGGATAACGGAATGAGTCGCACATGGGCATTAGCATTTTTCAGGGGGACTGGCCAACTCAATT  
 GCTTAG

>YJL201W 0.8 Cold

ATGATAGATATCAACGTTAATAACATATTTTTTAGATCTTATTCAGTTGATCCTAACTCTGG  
 TCACGCAATTTATGTCTTTGATTCGACTTATTTGCCAGCATCTGATGAAATTGGCGATAAGC  
 AAGTTTATGACTTGGCTTATTAATGCCCTCATGGATCGATTGGTAATGAAATTGCCACAGGCA  
 CCATATTCAGTGGTGATTTTTTCATCTGGGTTTTCCAGAGAAAAATAAGCTGGGTTTACGG  
 TATTAATAATGTTTGCAAAGTTACCCAAAGAGACCAAGTCTATTTACAAAAGATTTTTTATTG  
 TTCATGAGTCATTCCTCGTTAGGTCGGTCTATCAAGTAATTTCAAACGCTATGAACTTTAAC  
 TTCTTGGACTCAAAAGATAGTCAGCATGATTTTCCAAGTTTAGTTCATGTCTTGGACCTGAC  
 TTCTTTATCCGAGCTAATAGATATTACGCGACTTAGAATATCGTTGAACTGTACTTATATG  
 ATTACCAGATACGCGAACATATAAATGTCCCGGAGGAATATTATAACAGATTGACCCCTCTG  
 GCAATAAGACAGTATAGGCAGTTAGTATTCGATAAAATTTTCAAGAAATTACAGAATGACGC  
 TCTGTTGTGTGAATTGATATTCAGAAGCCGGGAAACTATAAAAAGGTAAACATTTTTTTGG  
 ATATTATCAAAAAGAAACAACACTACATTGATTTATCTCAATGGGATATTTATTTCTTTGGCATCC  
 GTGTGGTTGAATTACTTTCATTAAGAATAAAGCCAAACCTCTAATCCCAATTGAATTAATTCC  
 GTTACCAATTGTTGATGATCTAAAGTTCACAAGTGAAACATTCGCGAAAAATTATTAATAATTCA  
 ACCAATACCAGGACCTCTTTATGGTCATAATTCCTTTTTTTAATAGGATCATAGCGCATGGT  
 GAATCGACTAAAACATGATTCAAGGACCTAAGTAAAGCTTTAACTCCGGCGTTATGTAAGGA  
 AAAACTTTCCATGATGACTAATGATCGTTTAGCTATTGGGTCGAGATATATTAATAAATTAC  
 TGGACTTTTTTCCCGAAATCGCGAAGGAAATATCATCACCTCCTTCATCCGTATCATCGTCT  
 TCTACTATCCCTGTTTTGCTAAGCCAAGGAAGTCGTCGCCAACCAGATACAGTGAAC TAGG  
 CTGCTTAACCCTCCTTAGAAGTCGAAGCCCTAGTCCACAAAGATCTGTTACGTCTCCAACGT  
 ACACACCTGTGCGATTACAAAATACACCAGTCTTGAAACCTAAGTCTTCAAGCAGAAATGTT  
 TCATCCCATCATTCATGCCAAACCTCCACTTCCATTAAAGGCAGTTACACGACCACAACCT  
 GTCTCTAACTTCCAATTCTAATACAGATTTGGCATTAGCTTCTTCTTCTACAGATACATTAT  
 CCTCACCGACGAAGACTCCATCAGCAGACTCGTTCATTGAGTAACAGCAGCACC GATTTA  
 ACGATATCAGATAATATCAAAGAAATGGTTAAGGACGAGCCAGCAAAGGATAAAAAATCTGT  
 GGAAACAGATATATTCGTACAACAGTTTGAAAGTTTAAACCCTCGTCCAAAACGCGAAGATTA  
 AGAAGTTCGACAAAAGAACTACAAGAAAAGAAGAAGAAAAATGAACTACTTCAAAGACAGCA  
 GATAAATCTCTCAAAGGGATATTAGATATTAAGCAAGCAACAAGGTTAGCAGGCTAGC  
 TGCATTGTACGAAGAACGTTTACAAGGTTTACAAGTAATGAATGAAATGAAACAAAGGTGGT  
 AA

>YOR297C 0.76 Cold

ATGCTATTGTTTCTGGCTTGAAGCCTGTTCTTAAATGCTTCCACTGTCATTGTAAATCCTGT  
 ACGAGCTGTTTTTCCAGGATTAGTACTTTCAACCAAAGATCCTTTTTATAGCATTAAATCGTT  
 TAAATGCTGAAAAATAAATAAACGATATTGCAAATACGTCAAAGAGGCATCCTCTTCAGTG  
 CAGATGTTTAAAGCCCCAGAGTCTCTCAATTTAAGGACTCTTATCAAAAAGACTATGAGAG  
 AATAGCAAATATACTTTGATTCATTAAACAATGGTACCTTTTTATGCCTCCTTTACCGGCG  
 GGGTTATAAATCCTTTACTCGATGCGTCTTTATCGTCCATTTTTTTGATATATTTACAGTAT  
 GGCTTCACAAGTTGTATTATTGACTATATACCGAAGGGAAAGTATCCAAGATGGCATAAGCT  
 CGCCCTTTATTGCCCTATGGAGGATCCATGTTGTCCCTGTACGGTATCTACGAATTGGAAA  
 CGAAAAATAATGGTTTTGTTGACCTGGTAAAGAACTTTGGAATGAAAATGATGACCATTTG  
 TATATATTTGGAAGAACTGA

>YLR410W 0.73 Cold

ATGAGTGGGATAAAGAAGGAACCGATTGAATCTGATGAGGTTCCCTCAACAAGAGACAAAAAA  
 TAACCTTACCTAGTGCACCTTCTGAGATGTCACCCCTTTTCCTAACAACAAAACACACAGAAGG  
 CTATGCAATCTATTGCACCAATATTGGAGGGTTTCAGTCCTAAGACGTCAGCTAGCGAAAAAT  
 ATGCTTTTGAATTGCCACCTCCCGGTATTCAAGATGATCACAGTGAAGAGAATCTCACCGT

GCATGATACTCTGCAAAGAACCATAAGCACTGCACTAGGAAACGGAAACAACACCAATACAG  
TTACAACCTCCGGTTTAAAAAAGGCAGACAGTGAATCAAAGTCAGAAGCTGATCCTGAGGGG  
CTCAGCAATTCTAACATAGTCAATGATGCAGATAACATAAAATCCATCTCCAAGACCGGATC  
GCCCCATTTACCTCAAGGAACAATGGACGCTGAGCAGACTAACATGGGAACCTAATCTGTAC  
CTACTTCATCAGCTTCTTACGCAAATCCTCGACTAGTCATCCCAAACCTAGGCTACCCAAG  
GTAGGGAAGATTGGGGTATGTGCAATGGATGCAAAAGTCTTTCAAAGCCAATGAGACACAT  
TTTGAATCGTTTAAATGAACATGGTGAATTTGAAACTGTCATTTTTGGAGATAAGGTGATTC  
TAGATGAAAGAATAGAGAATTGGCCAACCTGCGACTTTTTGATATCTTCTTTTTCTTCAGGA  
TTTTCCCCTAGATAAAGCAATTAAATACGTCAAGTTACGCAAGCCTTTCATTATCAATGATTT  
AATAATGCAAAAAGATTTTGTGGGACAGGAGATTATGTCTACAAGTATTAGAAGCCTACAACG  
TTCCAACACCTCCTAGACTGGAAATCAGTAGAGATGGTGGTCCCCGTGCCAACGAAGAATTA  
AGGGCAAAATTACGTGAGCATGGCGTAGAAGTTAAACCCGTTGAAGAACCAGGAATGGAAAAT  
GGTTGATGATGATACTTTAGAAGTTGATGGGAAAACCATGACTAAGCCCTTTGTTGAAAAGC  
CCGTTGATGGTGAAGACCACAACATTTATATATACTATCATTTCTAAGAACGGAGGAGCGGT  
CGTCGTCTATTCCGTAAAGTTGGTAACAAGTCTTCTGAGTTTGATCCTACTTTGGTTCATCC  
TCGTACGGAGGGGTCTTACATTTATGAGCAGTTTATGGATACCGATAATTTCGAAGATGTGA  
AGGCTTATACGATTGGTGAGAACTTTTTGTCACGCTGAAACTAGGAAATCACCTGTGGTTGAT  
GGTATAGTTAGAAGAAATACTCATGGTAAAAGAAGTTAGATATATTACTGAGTTATCAGACGA  
AGAGAAAACCATGCTGGGAAAAGTTTCCAAAAGCTTTTTTACAAATGATCTGTGGTTTTGATT  
TGCTTCGCGTTTTCTGGTAAAAGTTACGTCATTGATGTTAACGGATTTTTCTTTTTGTAAAGGAT  
AACAAAGCTTACTATGATTGATGCGCCAATATATTGAGAAGTACCTTCATTGAAGCCAAAAA  
GAAGATGGATATGAAAAGAAGAATCTGCCCATTTATTCGTGAAGAAAAGGAACAAAAGTGGG  
TATTCAAAGGACTGGCTATCATTATCCGTCACGCGGACAGAACACCAAAAACAGAAATTCAAA  
CATTCATTCACTTCGCTATTTTTTATATCGTTACTAAAAGTCCAAAAGAAGAAGTTGTTCAT  
TCGGAATGTAATGATTTAAAGATTGTTCTTCAGGCCTTAAGAATTGCGTTAGATGAAAAAG  
CAGGAAATCCAGCTAAAATTAAGTGTAGCAAACGCTCTAGAAAAGAACTGAATTTTTCCC  
GGTACGAAAATACAATTTGAAACCGTTTTTAAATAAAGAGAACGAAGTGAAAAAAGTTGAGTT  
TATTTTTGAAATGGGGTGGTGAACCCACTCATTCTGCCAAATATCAGGCTACGGAACCTCGGAG  
AGCAAATGAGACAAGATTTTGACCTATTGAATAAGAGCATTCTACAAAACATCAAGATATTTT  
TCATCGTCTGAGAGACGTGTTCTTCATACGGCGCAGTACTGGACCAGAGCTCTTTTTTGGGGC  
CGATGAATTAGGTAGCGATGAAATCAGTATTAGAAAGGATCTTTTTAGATGACAGTAATGCCG  
CCAAAGATTTAATGGATAAGGTGAAAAAGAAGTTGAAGCCACTTTTTAAGAGAGGGTAAGGAA  
GCTCCCCACAATTTGCCTGGCCTTCAAAGATGCCGGAGCCATATTTAGTCATAAAGCGAGT  
GGTTGAATTGATGAATTACCATAAAAAAATTATGGATAACAACCTTTGCTAAAAGGATGTCA  
ACTCGATGCAAACAAGATGGTGTACTTCTGAAGATCCTAGTTTGTTTAAGGAAAGGTGGGAT  
AACTTTTTCAAAGAATTTCAATAATGCTGAAAAAGTCGATCCTTCTAAAATTTCTGAATTGTA  
TGATACTATGAAGTATGATGCTCTTCCACAACAGGCAGTTCTTAGAGAACATATTTGACCCGG  
GTCTTCCAAATGAAGCTATCGCCGATGAACTCGGCAGTCATTCTTTAGTTGACCGATACCCA  
ATTAACGTTCTCGCCAAAATAATTTTTAAGATAATAGACAGTCATAGCATGAACAATTTCTGG  
AAAGAACAGTAGTAATAGTGTGGGTGTTAGGATGGGTTCTGGAAAGCGGAAAACATCTA  
CAGCAAGAAACCCCAAATCTTCTCAATTCGATGAGCCACGCTTTATGCAGTTGCGGGAG  
CTGTATAAGCTGGCCAAAGTATGTTTTGATTTTATCTGCCCAAAGAATATGGTATTTTCTAGA  
TGCAGAGAACTGGATATCGGTTGTTAACTTCGTTGCCCTTTGGCAAAGCAAATACTAAATG  
ATATAGGAGACATGAAAATAGAGAACTCCAGCTTGTGTTGCGTACTTCACCAAAGAGTCC  
CATATTTACACTCTATTGAATATCATATACGAATCTGGTATTTCCAATGAGAATCGCTAGAAA  
TGCTTTACCAGAACTAGACTACTTGTGCGAGATCACTTTTGAACTTTATGAGAGTACGGATG  
CTTCTGGTCAAAAATCGCATTCATTAGACTAAAATGTCTCCTGGGTGTCATACTCAAGAT  
CCGTTAGATGTTCAATTAGATGACAGGCATTATATTAGTTGTATTCCAAAGATTTCCCTGAC  
GAAGCATTTGGATATGGACTATGTTCAACAGAAATTGAGAAACAAATTTACCAGGGTCATTA  
TGCCCTCCGAAATTTACACCAGTAAACATTACGAGCCCCAACCTTGAGTTTCCAGAAACGCAA  
ACCAGAAGAAAGTCGGTATCTGTTGAGAAGTTGAAACGTCTGCCTCGTCCGGATCTTCATC  
ATCTACCTCCGTTAACAAGACATTAGATTAG

>YPL278C 0.82 Cold

ATGACAGATAACACAACCTCCAGCGACTTAATAAAGAATGTGCAAACGGCTCGCTCCACTAT  
CGATGGTTTTAATGAATCTCTAGGGTGGATTGAACTAAAATACCAGTTGTGAGAGGCAATGCA  
ATTGGGATGAAGTTTGTACACTCCTTCCCTGGGGCCATCTCCAATGGGTATGACTGAACCA

GGTCCCACAATGAGGGATTTGGAACCCACTTTGATGAATCTCGACAAAGGTTGGTTATTA  
CAGTAAACTACAGTGTATCAATATAAATGATTTGATGGTTAATCGTAATCATTAG

>YIL076W 0.82 Cold

ATGGATTACTTTAATATCAAGCAGAATTACTACACGGGGAACCTTCGTGCAATGTTTGCAGGA  
AATAGAGAAGTTTAGCAAGGTCACAGATAACACCTTATTATTCTACAAGGCGAAAACCTTT  
TAGCTCTAGGCCAATATCAATCACAAGATCCTACCTCTAAGCTTGGCAAGGTTACTAGACTTG  
TACGTCCAGTTCTTAGATACAAAAACATTGAAGAATTAGAAAATTTGTTAAAGGATAAACA  
GAATTCACCATATGAATTATATCTGTTAGCCACGGCTCAAGCTATCTTGGGTGACTTAGATA  
AAAGTTTGGAGACATGTGTAGAAGGGATTGACAATGACGAAGCAGAAGGGACTACAGAAATTA  
TTGCTGCTTGCCATCGAAGTCGCTTTGTTAAACAACAACGTTTCGACCGCGTCCACCATCTT  
TGATAACTACACTAATGCTATTGAGGATACTGTTTTCCGGTGACAACGAAATGATTTTAAACC  
TGGCTGAATCGTACATTAATTTGCCACAAACAAAGAAACGGCAACATCCAACCTTTTACTAC  
TATGAAGAGCTATCTCAAACCTTTCCTACTTGGAAAACCTCAATTGGGATTGCTCAATTTGCA  
TTTACAGCAAAGAAACATAGCTGAAGCTCAGGGTATTGTCGAGCTATTACTATCTGACTACT  
ATAGCGTCGAACAAAAAGAAAACGCCGTATTGTACAAACCTACTTTCTTAGCAAACCAAATT  
ACGCTTGCTCTTATGCAAGGCTTGATACTGAAGATTTAACAAATCAATTGGTTAAATTTGGA  
TCACGAACATGCATTCATCAAGCATCACCAAGAAATTGACGCAAAATTCGATGAATTAGTGA  
GGAAATATGATACGTCCAACCTGA

>YDR159W 0.81 Cold

ATGAACACATCATTTGGCTCAGTAGTGCCTTCCACTAATTTCAATTTTTTCAAAGGGCATGG  
AAATAATGATAAACTAGTGCCAATAGTACTGTTAACAACAGCAATTTCTTTTTAAATAGCA  
ATGAAACGAAACCTTCGAAAAATGTCTTCATGGTGCCTACTCTACCTCTCAAAGAAGTCGCAG  
CAACCGTTACAAAATCTCTCACACTCACCTTCCCTACACGGAAAATAAACAGATAAAAAAGAA  
AAAAATATATGATAAACGATGCCAAGACCATTCAACTTGTAGGTCCACTGATTTCTCTCCTG  
ATAATTTGGGATTTCAGAAGAGATCGCACAAAGCAAGAGAATTACCAAGTTTTTTGATTAAT  
CAAGAACCTCAATTGGAGAAAAGAGCTTTTTGTACAAGATCCCTGGGACAAGGCTAATCAAGA  
AAAAATGATCTCATTTGGAAGAATCCATAGATGATCTCAATGAATTGTATGAAACACTAAAAA  
AAATGAGAAATACTGAGCGATCGATAATGGAAGAAAAGGGCTAGTGGATAAAGCTGACTCA  
GCAAAGGATCTTTACGATGCTATAGTATTTCAAGGTACCTGTTTAGATATGTGTCCCACATT  
CGAGAGATCAAGAAGAAACGTTGAATATACTGTGTATTCATATGAAAAAATCAACCAAATG  
ATAAAAAAGCTTCTCGAACTAAAGCATTGAAGGTCTTCGCGAGGCCAGCAGCAGCAGCAGCT  
CCTCCTTTACCTTCTGATGTTAGGCCACCCATATTTTAGTCAAGACATTGGACTATATTGT  
AGATAACTTATTAACAACATTGCCTGAAAGCGAAGGATTCTTATGGGATAGGATGAGATCCA  
TAAGGCAGGACTTTACATATCAGAACTATTCAGGACCTGAGGCGGTAGATTGTAATGAGCGT  
ATTGTTAGGATACATCTTCTGATCTTGCATATCATGGTGAAATCAAATGTGGAATTTTCGCT  
TCAACAAGAACTAGAACAATTGCATAAATCCCCTTATCACGTTATCAGAAATATACGATGACG  
TTCGTTCCAGCGCGGAACATGCCCAAATGAGGCTGAATTTTCGAGCTTATGCTCTCCTGAGT  
AAAATAAGAGACCTCAATACGATGAGAATATCCAAAGATTACCAAACATATTTTCCAAGA  
TAAATTAGTTCAAATGGCTTTATGTTTTCAGAAGGGTTATATCTAACTCAGCTTATACTGAAC  
GCGGTTTTGTTAAAACCTGAGAATTGTTTAACTTCTACGCAAGGTTTTTCCAGTTAATGCAA  
TCACCCAGCTTGCCATTATTAATGGGATTTTTTTTTGCAAATGCATCTGACGGATATTAGATT  
TTATGCGCTAAGAGCTTTATCACATACTTTAAACAAAAAGCATAAACCAATACCATTTATTT  
ATTTGGAAAATATGTTACTCTTTAATAATCGGCAAGAAAATAATTGAATTTTGTAATTATTAC  
TCAATTGAAATCATAAATGGGGATGCAGCCGATTTGAAAACATTGCAACATTATTCTCACAA  
ATTGTCAGAAACACAACCTTTAAAAAAAACATACCTTACCTGCTTAGAAAGGAGATTACAGA  
AACTACTTACAAGGGTTTAAATTAATGGCGGTGAAGATAATTTGGCTTCTTCGGTTTATGTG  
AAGGACCCAAAAAAGGATAGAATACCTTCTATCGCAGACCAATCTTTTTTAATGGAAAATTT  
TCAAAACAACATAACGAAAAGTTGAACAAAACCTCATCCGTTAAACCACAGATCAATACCT  
CTCCAAAAGAGTTGCAACGCGGCCCAACCCTTCTCTTTTTCACAGGAATCTAAGCAATTA  
CCTCAAATATCTCAATCTCATACTTTATCAACAAATCCTTTATTAACGCCACAGGTTTCATGG  
AGACCTATCGGAACAGAAACAACAACAATTTAAACCGTACAGACGGAGGCTCCCCATTTG  
TTTTTGATCAATCAGCACAGAATTTCTACGGTGAAGCTTCCAAGGCTCATATGATATCCACG  
ACCAGCAATGGTGCATATGATGAGAAGTTGAGTTTCAGAGCAAGAAGAAATGAGGAAAAAAGA  
AGAACAACGAATAGAAGAAGAGAAAACCTCAATTGAAAAAGAAGCAAGAAAATGCGGACAAAC  
AAGTAATCACTGAACAAATTGCAAATGACTTAGTAAAAGAAGTGGTAAACAGTAGCGTGATT

AGTATTGTTAAGCGTGAATTTTCAGAGGCTAATTATAGGAAGGACTTCATTGACACAATGAC  
 CCGTGAACTTTATGACGCATTTCTTCATGAAAGGTTGTATCTGATATATATGGATTCTCGTG  
 CTGAATTGAAAAGGAATTCACCTCTAAAAAAAAGTTCTTTGAGAAATGGCAAGCATCTTAT  
 TCTCAAGCAAAGAAGAACCGTATATTAGAAGAAAAAAAAGGGAAGAAATTAACCTCGTAAG  
 CCACCAATTAGGAGTACCAGGTTTTAAAAAATCTACATGTTTGTTTAGAACCCCGTATAAGG  
 GTAACGTAAATTCATCATTATGCTATCATCTTCAGATAAGAATCTAATATTTTCACCTGTA  
 AATGACGAGTTTAATAAGTTTGGCGACTCATTTAACCAAGATTTCAAAACTTTGGCGGCCGTT  
 AGAGATGCAATCAATCTATTATGATAACCTTACGAAAAAGTTCCCCTCCAATTCTCTTACTC  
 CGGCAAATTTATTCATTTATGCGAAAGATTGGACATCACTCTCAAACCGTTGGATCTTAAGT  
 AAGTTCAATCTGCAAACAGCACAGGATTCAAAAAAGTTTCAGCAATAATATTTATCTCTAGCAG  
 AATAATTTGTATTGATGATGAATATGAACCATCTGATTTTAGTGATTTGCAATTATTGATAT  
 TTAATACAGGTGTTACGAATCCAGATATATTCGATTTGGAGATGAAACTGAAAGATGATGGT  
 GAAGAAGTATAAGCTAATCACTGGTATTTCTCTAAATACAAATATATGCTTTTCCCTTTT  
 GATTATTTATTGGGAATCCGCAGAAAATACTTTATCGGAAAGTACCATTAAACACTTACTAA  
 AATTAACCGAATATCTAAAACTATAGTAGTGTATTGAACGCATTGACTTAATGAATCTC  
 ACCGAAGAATCCCCTCATAAGTGTTTAGAGGACAAATTATCTGAAATATCACATTCTTATGT  
 GTACAAGTTGACAGAAAGGGGAAAATATGATAAAACACTTCGTCAGAAAAGGTCATTGGCCG  
 GCATTCACCTCACGTAGCACTCAACTACAACTACAAAGGACATTGATCAAAAAGATGAAGAAA  
 ATGCTGGAAAAAGAGAAAAACAAGTACCAACAACAAATAGGCGAAAGGAACACCTATGCGCA  
 TCTAGAATCGCATATAGATGCATCACCAAGAAGCAAGAAAAGGAAATTGCCAATACTCCTGT  
 CAACTTCTCATTCGAGCCAATTTAAAACCTCTTAGCTTCTAGATTA AACACCTCTGGTTTCG  
 TCTACTTACCACCTTTACCATCTCATTTGGCGATGAAATTCAGGAAAACTCGAGAGTTAC  
 TAGTTTACATAACCGTATTACCCGTTAGCACACCAAGCCATAGTAATAACATAACAGCTGCAA  
 GTTTTAGCGGGAATAACACCACCGATATACAGTCCCAACAATTAATCGAAAACCAGAAAGAT  
 ACATCTGTATATTTGAATAACGTTTCTGAAAGGATTCTGGGAAATCAAGAAATATGTCAAAC  
 ACCAATTAATCCTGTTACTCCTGTGCTAGATGGGGCCGATCAAGGTAAGGAGGACATTCCTG  
 ATAGTATATTAGAGCTGAAGATCTTGATCGATTCTGTCAAGAAGAAAGTAAATAATGATTAA

>YKR003W 0.73 Cold

ATGGGCTCCAAAAAAGTACCCTAGGATCTGATTTCGCACCGGTTGAGCAAATCCAGTTTTTTC  
 AAGTAATAAGTCGTCACATTCAGCAACAAAAGATCAGCCAATTGATACCGACGATATTGATG  
 AAGACGATGAATCTGGTCATAATATTATCTTGAACATCATCTCACAATTGAGACCAGGCTGC  
 GATTTGACCAGGATCACCTTGCCTACTTTTTATTTTAGAAAAAAAATCGATGCTTGAACGTGT  
 CACAAATCAGTTACAATTCCCTGAGTTTTTTGTTACAGGCGCATTTCAGAAAAGGACCCCTTGA  
 AAAGATTTTTGTACGTAATGAAATGGTATTTGGCAGGCTGGCATATTGCTCCAAAGGCTGTA  
 AAAAAACCATTGAACCCAGTCCCTGGTGAATATTTTACAGCTTATTGGGATCTACCAAACAA  
 GCAGCAGGCATATTTATATATCTGAACAGACAAGTACCATCCTCCAGAATGTGCATATTTTTT  
 ACATGATTCCCTGAATCTTCGATTAGAGTGGATGGGGTTCGTTATTCCCTAAATCTAGATTTTTA  
 GGTAATTCAAGTGCGGCCATGATGGATGGATCAACAGTCTTGCAATTTCTGGACATAAAGGA  
 TGGAAACGGAAGCCCGAAAAGTATGTTCTTACACAACCAAATGTATATGTAAGAGGAATTC  
 TTTTGGAAAAATGAGAATCGAACTTGGAGATCATATGATAATTAATCTCCTAACTCCAA  
 GCTGATATAGAGTTCAAGACAAAGGATATGTTTTTGGAACTTACGATGCAATCGAAGGGAC  
 TGTAAGGATTATGATGGCAATGCGTATTACGAAATATCTGGTAAATGGAATGACGTTATGT  
 ATTTAAAGGACTTAAAGCAACCTCGTTCTTCACCAAAAAGTTTTCCCTGATACTCATAAAGAG  
 TCACCATTGAGACCAAAGTTTCGGCCATTGAGCGAGCAAGGTGAATATGAATCCAGAAAAC  
 GTGGAAAAAGGTTACAGATGCGTTGGCCGTTTCGCAATCATCCTGTTGCGACAGAAGAAAAAT  
 TTCAGATTGAAGATCACCAAAGACAGTTAGCCAAAAACGCATTGAAGATGGCGTAGAATTT  
 CATCCAAAGTTGTTTAGAAGATCAAAGCCTGGCGAAGATCTTGACTATTGTATTTATAAAAA  
 TATCCCTGTGACGAGGACCCGTGAGAAGCAAATACGAAGCATATTGCAAAATAGCACCTATTT  
 TACCTGGTCAACAATTTACCGACAAATTTTTTCATCCCCGATTTGAGAAAATAAAATCACAA  
 AAGAAGATGATTGAAAACGAAAAGCAGAACCAGCAAAAACAATAG

>YDR279W 0.77 Cold

ATGACCGTTTTCCAACATTGGGGGGGAAGAACGACTAATAATTTTACCAGACGATTATGAAAC  
 TTCGAAAACATAAACACTTTTACTGCGCCACCTTCCAATATTACATCCAAACCTCGTA  
 TCGAGCTCTTCGAAAATATTAATGGAAAACTTTACGAAAATAAGATCTTTTCAATTCGGCAA  
 GGGCCCTCGTATTCACATGAGGAAGATTTGGCAAATGATAAATATCACTATACTAAGGAAAA

TCACCCGATCAAATCAACTTTTCATTGTAAATACGTCTGATCCCACCGATGGTTATGTTTTTA  
 ACTCAAGCAAAAATACACTTTTTGTTCTTTATACGATATTGCTTTTAGTTTGATTGGATTTTAC  
 TATAGAAACAGTGTTCAGCAGATGAACAAGATTACTCCAATTCAAGTGATACTGGTAAAA  
 CCAAAAAAGCAACAGCAAAACCAATGAGAAATTTCTTACGGTGCCTGATTACCATGATTTCT  
 TAACGGATAACCATGACAAGAATTGGGAAAAACATTTCTTAAAGTCGTCTCAAGAGTGGCTTA  
 GCAAAAGTTAGTGAAACCATTGAGGAAGCTGGTGACGTCTATTACAAGATCACATCTGCAAT  
 GATAACACAATTTTTGTTAGGCAAGGTATCAAAAATTGTAGAAAACCTTTCCTCCAAGTATCC  
 CTACACTTAAAAATGCCCAACGGAAATAAAAACAGTGCTACAAGGTAGTTATGGCTACAAAT  
 CTTTTAGTTTTCCCTGATTCCAAGGGCGGCTACCATAATTTACTTACCTTTTCACCTACAAT  
 GGATAGTGGTTGCCATAATCCGGATATAAAAAGCTAGCTTCATAGAACTCGAAAACCTACGAGA  
 CTACGAACGAATTACAGAATGCTGAAAGAGAATTACTGATGAAAAGTGCCATGAATGTAGGC  
 CTAATTCGAATGGCAGGGTTTCATTGCCAGTGAAAAAAGTTACCAAAAAATAGTTCAAAA  
 TAAAAAACCAAAAGTAGCCATAGGAAAAGGGGCCATTGATGGATTTTTTTAAACGTAAGTAG

>YHR215W 0.82 Cold

ATGTTGAAGTCAGCCGTTTATTCAATTTTAGCCGCTTCTTTGGTTAATGCAGGTACCATACC  
 CCTCGGAAAGTTATCTGACATTGACAAAATCGGAACTCAAACGGAAATTTTCCCATTTTTGG  
 GTGGTTCTGGCCATACTACTCTTTCCCTGGTGATTATGGTATTTCTCGTGATTTGCCGGAA  
 AGTTGTGAAATGAAGCAAGTGCAAATGGTTGGTAGACACGGTGAAAGATACCCACTGTCAG  
 CAAAGCCAAAAGTATCATGACAACGTGGTACAAATTGAGTAACTATAACGGTCAATTCAGCG  
 GAGCATTGTCTTTCTTGAACGATGACTACGAATTTTTTCATTCTGACACCAAAAACCTAGAA  
 ATGGAACCACACTTGCCAATTCGGTCAATGTTTTGAACCCATATAACGGTGAGATGAATGC  
 TAAGAGACACGCTCGTGATTTCTTGGCGCAATATGGCTACATGGTCGAAAACCAAACAGTT  
 TTGCCGTTTTTACGTCTAACTCGAACAGATGTCATGATACTGCCAGTATTTTCATTGACGGT  
 TTGGGTGATAAATTCACATATCCTTGCAAACCATCAGTGAAGCCGAGTCTGCTGGTGCCAA  
 TACTCTGAGTGCCACCATTTCGTGTCTGCTTGGGACGATGATGTCAACGATGACATTTTGA  
 AAAAATATGATACCAATATTTGAGTGGTATTGCCAAGAGATTAACAAGGAAAACAAGGGT  
 TTGAATCTGACTTCAAGTGATGCAAACACTTTTTTTGTCATGGTGTGCATATGAAATAAACGC  
 TAGAGGTTACAGTGACATCTGTAACATCTTACC AAAGATGAATTGGTCCGTTTTCTCCTACG  
 GCCAAGACTTGGAACTTATTATCAAACGGGACCAGGCTATGACGTCGTCAGATCCGTCGGT  
 GCCAACTTGTTCAACGCTTTCAGTGAAACTACTAAAGGAAAGTGAGGTCCAGGACCAAAAGGT  
 TTGGTTGAGTTTACCCACGATACCGATATTTCTGAACTATTTGACCACTATCGGCATAATCG  
 ATGACCAAAATAACTTGACCGCCGAACATGTTCCATTTCATGAAAACACTTTCCACAGATCC  
 TGGTACGTTCCACAAGGTGCTCGTGTTTACACTGAAAAGTTCCAGTGTTCGAATGACACCTA  
 TGTTAGATACGTCATCAACGATGCTGTGCTTCCAATTGAAACCTGTTCTACTGGTCCAGGGT  
 TCTCTTGTGAAATAAATGACTTCTACGGCTATGCTGAAAAGAGAGTAGCCGGTACTGACTTC  
 CTAAGGTCTGTAACGTCAGCAGCGTCAGTAACTCTACTGAATTGACCTTTTTCTGGGACTG  
 GAATACCAAGCACTACAACGACACTTTATTAACAGTAA

>YDR541C 0.69 Cold

ATGTCCTAATACAGTTCTAGTTTCTGGCGCTTCAGGTTTTATTGCCTTGCATATCCTGTCACA  
 ATTTGTTAAAACAAGATTATAAGGTTATTGGAAGTGTGAGATCCCATGAAAAAGAAGCAAAAT  
 TGCTAAGACAATTTCAACATAACCCTAATTTAACTTTAGAAATTGTTCCGGACATTTCTCAT  
 CCAAATGCTTTTCGATAAGGTTCTGCAGAAACGTGGACGTGAGATTAGGTATGTTCTACACAC  
 GGCCTCTCCTTTTCATTATGATACTACCGAATATGAAAAAGACTTATTGATTCCCAGGTTAG  
 AAGGTACAAAAACATCCTAAATTTCTATCAAGAAATATGCAGCAGACACTGTAGAGCGTGT  
 GTTGTGACTTCTTCTTGTACTGCTATTATAACCCTTGCAAAGATGGACGATCCCAGTGTGGT  
 TTTTACAGAAGAGAGTTGGAACGAAGCAACCTGGGAAAGCTGTCAAATTGATGGGATAAATG  
 CTTACTTTGCATCCAAGAAGTTTGCTGAAAAGGCTGCCTGGGAGTTCACAAAAGAGAATGAA  
 GATCACATCAAATTCAACTAACACAGTCAACCCTTCTCTCTTTTTTGGTCCCTCAACTTTT  
 CGATGAAGATGTGCATGGCCATTTGAATACTTCTTGCGAAATGATCAATGGCCTAATTCATA  
 CCCAGTAAATGCCAGTGTTCCTGATTTTCATTCATTTTTATTGATGTAAGGGATGTGGCC  
 CTAGTCTCATCTGTATGCTTTCCAGAAGGAAAATACCGCGGGTAAAAGATTAGTGGTAACTAA  
 CGGTAATTTGGAAACCAAGATATCCTGGATATTTTGAACGAAGATTTCCACAATTAAGAG  
 GTCTCATTCCTTTGGGTAAGCCTGGCACAGGTGATCAAGTCATTGACCGCGGTTCAACTACA  
 GATAATAGTGCAACGAGGAAAATACTTGGCTTTGAGTTTCAAGTTTACACGAAAGTGTCCA  
 TGATACTGCTGCCCAAATTTTGAAGAAGGAGAACAGATTATGA

>YHL047C 0.76 Cold

ATGATCGAAGTCCCAGAAGACAATCGTTCTAGCCAAACAAAGCGTAAGAATACTGAAAAAA  
 TTGTAATGAACTGATGGTTGATGAAAAGATGGATGACGATTCGTCGCCAGAGATGAAATGA  
 AAGATAAATTAAGGGAACAAAATCATTGATTATTCGTAAGTCTGAGCTAATGGCTAAAAAG  
 TATGATACTTGGCAATTAAGGCTATATTCCTGTTTTCTGCATTCATTTGCACTTTTCGCTTA  
 TGGATTAGATAGCAGCATAAGGGGTACATATATGACCTACGCAATGAACTCGTACTCCGCAC  
 ATCTCTCATTCTACAGTAAGCGTCATAGTTCTAATGATATCTGCTGTTTCACAGGTGATC  
 TTTGGAGGGTTATCAGATATCTTTGGAAGGCTAACGTTGTTTCTTGTATCCATTGTACTTTA  
 CATTGTGGGTACAATAATTCAATCTCAAGCATATGATGTCCAGAGGTATGCTGCTGGAGCTG  
 TCTTTTATTATGTGGGACTTGTTCGGTGTATGCTACAGGTGTTTTGATGTTGTCTGATAAT  
 TCTTCATTAATAATGGAGGCTATTTTACACATTGATACCTTCATGGCCCTCGATTATCACTAC  
 GTGGGTCTCAGGTAGTGTAGTGGAGGCAGCAAACCCGTTAGAGAACTGGTTCGTGGAATATTG  
 CTATGTGGGCGTTCATTTTCCCTCTATGCTGTATCCCATTGATTTTGTGTATGCTCCATATG  
 AGATGGAAAGTAAGAAATGACGTGGAATGGAAAGAATTACAGGATGAAAAATCGTACTATCA  
 AACGCACGGATTAGTACAAATGCTGGTACAGTTGTTCTGGAAGCTAGATGTTGTGGTGTGT  
 TGTGTTTTACTGCTGGTGTGGTGTATTCTTGTACCACTCACTCTTGCTGGTGGCGTCTCT  
 ACAAATTGGAGAAATTCAAAGATTATCGGGCCCTTTGTGCTTGGCTTTGCTCCTGGTTCAGG  
 CTTTCATATATTGGGAAAGTCGACTTGCTTTGGTTCCTTTTCGCTCCATTCAAGCTGCTAAAAG  
 ATCGTGGCGTGTGGGCCCCATTGGGAATTATGTTTTTTATCTGCTTTGTATATCAAATGGCT  
 GCTGGGTATCTCTACACCATTCTAGTAGTTGCGGTAGATGAGAGCGCTTCCTCAGCTACAAG  
 AATAATAAACTTATACTCTTTTGTGACTGCTGTTGTTGCTCCATTTCTGGGGCTCATCGTTA  
 CGAGATCATCTAGATTGAAGTCGTATATTATTTTTGGTGGCTCACTTTATTTTACTTATG  
 GGACTATTTTACCGCTACAGGTCAGGTCAAGACGCCGATGGAGGTATAATTGCTGGTATGGT  
 TATTTGGGGTCTCAGTAGTTGTTTATTTCGATTATCCTACAATTGTTTCTATTTCAGTCGGTAA  
 CATCCCATGAGAATATGGCTACTGTCACAGCATTAACTATAACAGTTTTTTCAGAATAGGTGGA  
 GCAGTTGCAGCTGCCATTTCCGGTGCCATATGGACGCAGTCATTGTACCCTAAATTATTGCA  
 CTACATGGGAGACGCTGACCTGGCTACAGCAGCATATGGCTCACCCTAACTTTTTATTCCTT  
 CCAATCCCTGGGGTACTCCAGTTAGGTCTGCGATGGTTGAAGCTTACAGACACGTTCAA  
 TACGAAGTTATTGTTGCGCTTGTATTTTTCAGCGCTATGTTCCCTTCTAACATTTCTGCGTAA  
 AGATCCTCGGTTGACTGAAGATTTTGGCCAAAAGTTACCTGACAGAGAATATGTCCAAACCA  
 AGGAAGATGATCCTATCAATGACTGGATCGCGAAACGTTTTCGAAAGGCCCTTAGGAGGTCAT  
 AAGAAAGATTTACAAAACCCCAACAGGATATGTGTTTCGAAAAAATGATCTCTGA

>YNL009W 0.69 Cold

ATGAGTAAATTAAGTTGTTTCATCCCATCGTGGAATGGACGGTGATGAGCAGACAAGAGT  
 TATTTGGAAACTTATCAAAGAAAAATTGATATTGCCATATTTAGATGTGGATTTAAAATACT  
 ATGACCTTTCAATCCAAGAGCGTGATAGGACTAATGATCAAGTAACAAAGGATTCTTCTTAT  
 GCTACCCTAAAATATGGGGTTGCTGTCAAATGTGCCACTATAACACCCGATGAGGCAAGAAT  
 GAAAGAATTTAACCTTAAAGAAATGTGGAAATCTCCAAATGGAACAATCAGAAACATCCTAG  
 GTGGAACTGTATTTAGAGAACCCATCATTATTCAAAAATACCTCGTCTAGTCCCTCACTGG  
 GAGAAACCTATAATTATAGGCCGTCATGCTTTTGGTGACCAATATAGGGCTACTGACATCAA  
 GATTA AAAAAGCAGGCAAACCTAAGGTTACAGTTTAGCTCAGATGACGGTAAAGAAAACATCG  
 ATTTAAAGGTTTATGAATTTCCATAAAGTGGTGGGATCGCAATGGCAATGTTTAATACAAAT  
 GATTCCATTAAGGGTTTCGCAAAGGCATCCTTCGAATTAGCTCTCAAAGAAAACCTACCGTT  
 ATCTTTTACAACCAAAAACACTATTCTGAAAAATTATGATAATCAGTTCAAACAAATTTTCG  
 ATAATTTGTTTCGATAAAGAATATAAGGAAAAGTTTCAGGCTTTAAAAATAACGTACGAGCAT  
 CGTTTGATTGATGATATGGTAGCACAGATGCTAAAATCAAAGGGCGGGTTTATAATCGCCAT  
 GAAGAATTATGATGGCGATGTCCAGTCTGACATTGTGGCACAAGGATTTGGGTCTCTTGGTT  
 TAATGACGTCCATATTGATTACACCTGATGGTAAAACGTTTGAAGCGAGGCTGCCCATGGT  
 ACGGTGACCAGACATTTTAGAAAACATCAAAGAGGCGAAGAAACATCAACAAATTCATAGC  
 CTCAATATTTGCCCTGGACAAGGGCAATTATACAAAGAGGAAAATTAGACAATACAGATGATG  
 TTATAAAATTTGGAACTTACTAGAAAAGGCTACTTTGGACACAGTTCAAGTGGGCGGAAAA  
 ATGACCAAGGATTTAGCATTGATGCTTGGAAAGACTAATAGATCATCATATGTAACACAGA  
 AGAGTTTATTGATGAAGTTGCCAAGAGGCTTCAAACATGATGCTCAGCTCCAATGAAGACA  
 AGAAAGGTATGTGCAAACCTATAA

>YCR015C 0.8 Cold

ATGAAAACCATTTATTTTCAGATTTTGGATGAAACAATCACAAAGAGTTGACACAATCTGCAC  
 CATTGCTAAATTACCGTATCTACTGAACCCGCGGTTGAAACCTGAGTGGGGTCATTTTACCA  
 AGACATATATGGACGGATACCATAAATACAAATACAATGGAACGAGATCACTGCCGTTGTTA  
 TCTTCAGGCGTACCTACGATAATTTTCGCAGTCTAACTTCAATAAGTTGTTTGGCGACGAATT  
 AAAATATCAAAATCATAACAGGGTTGTTGAGTTAAATAGTGTAATGAAATTACAAAACAAC  
 AGATTTTTAAGTCGATTTCTTTGGATCAAATGAAAACGTTTCGCCAGAGATCAGAATCACGAA  
 GATTGTTTTACTAAGAGATGGTTTCAAACGTTTTGCTCTTCAGTTGTCAAAAATTTTGAAAG  
 TGATTTTTTACGTTTTATCTATAAATTGGTCAAAGAGTTTATTCATGAAGTCATTGGTGACA  
 GAAGACTTAAAAATAGTCATATTTTTTGTAAACGATCTAAAAAAGTTAGTGACAAGTGTCT  
 CAAAGCTACAATGGTGAATTTGATTGTCCGTTATTGACAGGCTCTGATAAGGTCAAGATACT  
 GGGTGAAATATTAGATAAGATCGACTCAGGTTGCAATAAAGAAGGAAATCTTGCAGCTATT  
 GGTATATAGGGGATAGTGAGACTGACTTGTGTCCATATTACATCCATCTACTAATGGTGTA  
 CTGCTAATAAACCCGCAAGAAAATCCTTCCAAATTCATAAAAATTACCGAAAAGATTATTGG  
 TATCCCAAAGGATAAAATCTCGAGTTTTGAAGCTGATAATGGTCCAGCGTGGTTACAGTTTT  
 GTGAAAAGGAAGCGGTAAGGTGCCTACCTTGTGAAATCCTGGGACTCTTTAAAAGATTTG  
 ATCATGCAGGTAACAAAATGTAG

>YJR005W 0.69 Cold

ATGTCGGATCAAAAAGTTTTTGGCCAGATATAAAGCAAATGAAATCGTCACAGATCTGCAACA  
 TTTTGGAGTAAAAAAGTTTTAAATCGAATATAACAAGAAGGAAAAATGCTCTGAGAAAAATTA  
 TCGCCAATTTGGTTC TAGGAACTATGGCGAAATGTCCGTTCTGTTTTCTGAGCTCTTGAAA  
 TTTTGGCAAATTGAAGATGATCTAGAAGTGAAAAGAATTTGCCATGAGTATATTAGGGTGAT  
 CGGCGCATTA AACCTCAGCAGGCCAGAGAGGCTTTGCCATTTATAATGGACGATTTCAAAA  
 GCAGAGATGAAAAGTTACAAAATAATGGCACTAAGA ACTCTGGTATTAGTCCCGGTGAAAAGAG  
 CTATCTGATCAGGCC TTCGACTGTATCATTTTCATTGGTAAATCACAAGTCTCCACCTGAACA  
 AGTGACGAGGACAGCAATTTACGCACTGTTGGATTTAGATGAAATTTGATCATGAAAGGGTAT  
 TGGGGTTATCAAGCATTCTACATGACATTGTAAAAGCACAGTCGAGCTCTCCAGAAGTCATT  
 GTAGCTGCATTACATACTTTTATATTCCATTCAGAAAAAACGCTAACATGGAACCCCTCAG  
 GATTCCTTGGAACTCGCTTTTGACATGCTAGAGCTTTTACCCGAATTAATGAGTGGAAATA  
 AGGCTACTGTTTTGGAAGTTTTGACGACTTCGGTTGTGCCGAGCATTATTTGGATACCCAT  
 GAAATGATCGAACTAGCTTTACCGTACCTGCAACAAGTAAACACATACGTAGTGTGAACTC  
 TTTAAAATTCATCATGTACTTGTGTAATTATGTTGACGTCATCAAAGAAACTCTAGCCGAAA  
 AGCTATCTAACTCTGTAATAGCTTTGTTAGATAAGCCGCCTGAATTACAATTTTTTAGTATTA  
 AGAAACGTTATTCTTCTTTTATTGAGTAGGGAGTCATCTCTACTCAGGCTAGACATTTTCGTA  
 TTTTTTCATCGAGTACAATGACCCCATATACATCAAAGACACGAAATTAGAGTGTTTATATC  
 TTTTAGCTAACAAGGAAACATTACCAAGAATCTAGAAGAGTTGGAACAATATGCTACAGAT  
 ATTGATATTCAAATGTCAAGGAAATCAGTCAGAGCCATTGGTAATCTGGCTGTTAAGCTAGA  
 TGAAGACTCTGTACACGATTGTGTGCTGTTCTACTAGATTTGTTAGAATTCGGTGTGATT  
 ATGTCGTCCAGGAGATTATTTTCGGTTTTTCAGAAATATTTTGGAGAAATATCCCAATAATTTT  
 AAAGCAAACGTAACAGA ACTAGTCAAACACACTGAAGTTGTACAGGAACCTGAATCAAAAAA  
 CGCTATGATCTGGATAATAACGCAATATTCCGATGTAATTCCAA ACTACCTGGAGTTATTTA  
 GAGTTTTTTTCTCAAACATGTTTAGTGAGACGCTAGAAGTGCAATTTTCCATTCTGAACTCA  
 GCAATAAAATTTCTCATCAGAAGTCTTACAAAGGAAACTGAAGA ACTTTGTATGGATTATTT  
 AAAAGGATGCATCGATCACGAAAATAATCCTGACTTAAGAGATAAAAACACTGATGTATTGGA  
 GATTGCTGTCAATTAACGAAAACGTTCTCGTATATCAAACGCGATAACTTTTGAATCTTTAAAA  
 TCAGTACTGGACGGAGAGTTGCCACTAATAGAAATGAACACGAAATTAGATCCCACCGTTTT  
 GGAGGAATTGGAGCTAAACATTGGTACAATAGTATCGATTTACTTAAAACCTGTTTCTCATA  
 TCTTTAGATTGAATAAAAACCAA ACTGCTACCACAAAGTCTTATTTTGAATCCAAACAAAGAC  
 CTCTTGCCAGTTGTAGGTA ACTCATTTCTCCA ACTGGAGCTAATAGGGACCGTCAAAATTC  
 AGAAAGCCAGTCTCGACGAAGTCCAGAAAGACTGCTATGATGGATGATTATGATAAGCCCCG  
 CTGAAAAAATTAATCAGTTGAAAGGTAAGCGTAAATCTAGTTCAAACAACCCCTCAAAACTA  
 TCACGGAAACCCCAACTTTATTAAGAAA ACTCTCTATGAAACGGCCCTTTTCGTGA

>YKL034W 0.79 Cold

ATGGAAATCGATGGCAACACTCTGGTGTTCATAATAGTGATCCTTTTCTATTTTTCTCCTC  
 ACCGGTGGTGATGGTGTGTCTTCTCAATATGAGTTCAATCAACTCCAGAGACTCAAGCAGC

AGTTCGGAACAGAGCACAAATACGTTTCGTCAATATGACATATACAGATAGTTTTTCGAAATATT  
 ACCGGGCTTAAACTCAGCTACCAAGACATGCTGAATAATCCTCTCCAAAATGCCACTTACCC  
 ACTACCAGGAAAAGATTATGATCGATGGTTTCCCAATCAAACTACATGGTTTTTGCCCAACG  
 ATGTCATAGAGGCCATAAATACTGAAGTCTGGAATACTTCGAATGATGACGCTTCCAACCTT  
 TTCCCTCCCAATATTACAAGCACCCTGTTAGGTAATAATCGACCTTGTATCAAATAACAAGTA  
 CGAAAAGATAAGGATGCCTGTACCCAGATTCTATGAGCCGGCAACTGATTTTTTCAGAGGATA  
 TTCTCCTGAAGGTGAGACGTACTGGTCTGAGTGGCCTTCGTATGGCGAACTTCATAATGTG  
 AGTTTTTCAGCATGGCGAAATAGCTATTCAAATTTCTCATATGAGCAATCTTCAGGACAATAA  
 TAATTACTTAAGGAGAAATTTTATAAATAAGAAAAATGACCGTTGGAAGTTGTTAAATCTTC  
 AGATTGATTTCTCAGATAAGGCTGAAAAGGAAAAGCATTCCATATACTCGAAGGCTGTATAT  
 GACATTC AACGTGGTAGAATTTCTTTCTATTTCTCAGAGTTCTAAATTTTCATTTCATTGTTTCGC  
 CCTTCCTCATTACATGTCTTCCAGAATGATTATAATGAGAAAATATTTAATGATGTCAAGG  
 AACTCGTTGATGAATTTTGGAAATTTACGGATTACACAGATGTCATGACCATGAAAGACGTA  
 CAGGATGCTTATAAATAATGCCAACTTTAAATGTGAGTATTTGATTTTTCTTCAGTTGGAACC  
 ATGGAATCAGTACACAAGAGATCAGATCAAGTAAATAGATGATGAATTGAATTGGCCCCTGG  
 GCGTCCGGCAAACTCTGTCTAGTTTACCGCCCATAAATGTTGTCTCTGGATTACTGTATTCT  
 CCAGACTGTGGCGTACGATTAGGGCTTCATAACGTAAAGGGTACACGGTACGAATTAATAAAT  
 AATGTCGATCAGAAAACATCTATTGTTCCGGTATTGCATTATTTGCAGCCCAGATATACTTAT  
 TGCTTACTCAGATGCATCATACAAATACCCCTCCATGGTCAACAAAATCTCATTCTATTGT  
 TTCTCAATGATAAACTTAGTCGATGGTTCTTGGCCACTTTGTACTTTGTGCGCAGCTAGTGT  
 CGTTCGGAATTGTACTTACCCCTAGTTATAAGTGCTTTTTCTGCTGCTTTATCTTGGCATCTA  
 TTTTTGAAATACGCTACTTAATTTCAATTTACGCTTACACAGGTTAACGAACAGAATGTTGGG  
 ATTATCAACCTCCTGCGTGGTAACACTGGCACATATGATGAGAATAGGCCAAGACCCGCATT  
 CATTCCCGATGAAGGGTCTATCGGTGGCTCGTTATATGGTAGGTTTTTTCTTTATGCTAATCA  
 TTTTCACGTTTTTTAATATTGAGTTCAACTTCATGGCCCCGTCAGCTAAGGATGGTATTTGAG  
 TATATCCTAATCTTCATATTAAACTCATATTTGGATCCCTCAAATTTTTCCGTAACGCCGTTAA  
 AGGTATTCCTTCAAGAAGAGAAAAGAGCAAGATCTAGCATTGGAGGAAAATAGAAGTCAAAACA  
 AAATGCCATTATTGTGGAGTTTTGTAATTTGGTACAACAATAATTAGAAGCTTGCCCGTTGTG  
 TATGTTTTTCACTTACTCCTCTAATGTGTTTCAGGCACCATAAAGATGTTCAATTCGTCGTATT  
 TTTATCATTGTGGCTACTGTTTCAAATTAGTATACTGTATTCTCAAGATGTATTGGGATCGC  
 GCTGGTTCTTGCCTAAGCACACAATACCTGATGGATATTCGTATTTCAAGCCCCTTTCAAAC  
 GAGTATATATCGGAGCATGGTGGTGGAACTGCTGAACATACCGTTGATTGCGCGATATGTAT  
 GTCTGATGTTCCAATTTACATAGAGGAAATTCAGAAACTCATAAGGTGGATCAGCACTCTT  
 ACATGGTAACGCCTTGTAATCACGTATTTTACACTTCGTGTCTAGAAAACGGATGAATTAT  
 AAGTTACAATGTCTGTGTGTAGGTCACCATTACCTCCGTTGTAG

>YGR283C 0.82 Cold

ATGGCAGTAAACATAAATCCGAGAGCCTTAAGCACGAAGAGGGGGCTGCCAAAAGGCCAAA  
 GACAGGCCTATTGAAGCTAAAAAAAATCATGGATATAGAATCTAATGTGGTCAAATATTCCA  
 TATGCATACCGACAACCTGTTATCGACAATTGTAATAATTTGGAGCAAGTTACATTTACTGCA  
 TATCAAATAGCTCGGACAGCTGTATTGTTCAATGTTCAAGAAATCATAGTTCTAGACCAGTC  
 AAAAGATAAAAAGCATGAAAAAAAATCAAGATCAAAGGAGACTATCTCTGATTGTTTTATTAC  
 TTGCCACACTATTACAATATTTTGTAAACGCCTCCAAACTTACTGGATACTACATTCAAAAAA  
 AAAACAAGTTATATTTAAAGTGTGCATCTACCTTTCCGCCATTGAACCAGCTACCTTTTAT  
 GAACGCATCTGCCGAACAACACTACAAGGAAGGCTTATCAATCGCACGAGATAGCTCAAAAAG  
 GTAAATCTGATGATGCTCTAACAATTTGGTGTATATAGGAAAGAATCAAATTTATTACGTTA  
 TCTAACCAAAATATTTCCCAATACTGCGCGTGTAAACAGTTGATACAGAGCGCAAAGAAGTAGT  
 GTCACCCATAGATGCTTACAAAGGAAAACCACTCGGCTATCATGTTGGAATGGCAAGCACTT  
 TGAATGAGGTGTCCGAAGGTTACACAAAGATCGTTTGGGTCAACAGTGGTACTTCCACTAC  
 GACGAAGAGTTGTCAAAGTACCACAAGGTAGAAACAAAGCTACCATACATCGCAAAAACCTGAA  
 AAAAGTTCAACATCAGAAAAACCCTGTAATATCCTGCTTATCTTCCGGGAAATGGGGCCATT  
 TAAAACGTTGTTTTCAGGAGATCTGACTTAGAATCCTCTTCTTTGCATCATTTCTTTCTGGT  
 CAACTGCAATTCCTGCTTCCGTACCCAGGAAATATACCCATTCAAGATAGCCTACCCAT  
 AGCTCTTACCATGTTTTAGCGTTGGGCAAGTTGA

>YKL023W 0.81 Cold



ATGAATAAAGAAGAATTATTGGGTTTTCTACTAGATGACAGTATTGATAGCCAAAAAAGATG  
 CGTCACGGATCACGAGGCCTACTCTAATTGGTTAAAGAATGATAATGATGAACGTACGGCCC  
 ATGAGGAAAGCTCTTCACAAAGTACGATAGCCGCATTGAATAAGAAGAAGCAGACAGAAGCT  
 GCTCAAGAAGATATAGAAGAACTGTTAAACGGCTTAGAAGGCATTATTGGAGGAGCCGACCC  
 CCGTAATCTCAAGAGTAAGTCAAAGAGGAAAACAAAAAGGGCGGATCGAAACCAAGGGAAG  
 AAAACGTGAATACGGAGAAACATATTGTAATGCTCGAGGTAGAAGATTTTAGTGATATGAGC  
 ACCCACGAAGATGTCAACGGAGCAAGTCCGTCGCCAAATCTGGACCGGTGGAAGAAGATGA  
 GAAGCGAAGGAAAAACGCCAAGGAGCTGTCATACGATGAACTAAAAGACAACTAGAAGTTA  
 CCACTCGCAAATCACGTCTTGAGTGCAAAGACTTGAAAAAGAAAGTTTCATGGGCTCGAAAGA  
 AGGAACCTTGAACCTTGAACAGCGTTTAGAAGAGCTGAAGATTGAGAACCAGACTTTGATAGA  
 GATTAACAATAAACTGTTGAAAAACACTAATGAGGATGAGATTAACAAGAGCCAGAGGAACA  
 AGGAGAAGGACCGAAAGCGGAGGGAAGAAGAACGGCAAGGAGAAAAAGATGAAAGAAAGCAG  
 GAAAAAAGCAGGAAAAAAGCAGGATAATAAACATCTCAATCTTTTCCCTTCAACTGA  
 CATGAATGGACAGCCTATAGAATTTTGA

>YIR024C 0.79 Cold

ATGTTTATGGCAAGACAAGTGTAAAGAAATGGTCTATTTTTAAGGAGCCTTGCTCCCATAAA  
 GATAACCGCTAGAACTGTTGCATCAGCAATGCGGGCATTAAAGAGAAAAGTCAAGATTTGATA  
 AAACAATGATCAAACCTTTACTTTTGGTAATGATATTTGGGTCGATATTAACGCAGTAATA  
 GCCGAGAAAAGGAACATTATTGATATGGAAGGAAATATAAGCTAAAACTTGATAAATTTGAA  
 AGAGCTGATACGGAGGGTTCATGATAATAATGGAAAGGTAGACTTCGACGCAGATGATGAAT  
 TGAACCTTGTGAATTTGCGTTTAGGAATCGTCGGCAAGAACGCAACTGGGATGAAGGAAGAT  
 GAGACTGATATTGTGGTTCCCTAAGGAAGAGTCATTGGAAGAGATCTGGCAAAGTATAATAGA  
 CGAGGCAAAAAAAGAAGTAATCGAAAAAAGTCCAGATGCTGGCGTTAAGAACAAAGAAGGGA  
 TTGTCACTGATTTGAATGTTCTAAAAGATTTAGAAAAGTCGAAAAAAGAAGATGAAAAGGTT  
 TACCTAAGTGGTGATGTCCATATGATGATGAACCAACCAGGTGATTTGAATGAAATCGCCAA  
 AGAACATGATAAATCCCAAATTTCTATAG

>YIL004C 0.71 Cold

ATGAGTTCAAGATTTGCAGGGGAAACGCTTATCAACGTGATACTGGTAGAACACAGTTATT  
 CGGACCGGCTGATGGATCAAATAGTCTCGATGACAATGTATCATCAGCGCTAGGGAGCACAG  
 ATAAATTAGACTACTCCCAAAGTACTTTGGCATCTCTTGAATCTCAAAGTGAGGAACAGATG  
 GGAGCTATGGGTCAGAGAATAAAAGCACTCAAGTCATTATCGTTGAAGATGGGTGATGAGAT  
 TAGAGGCAGCAATCAAACCTATTGACCAGCTTGGTGATACTTCCATAACACTTCTGTAAAAC  
 TCAAAGGACTTTTGGAAACATGATGGAGATGGCCAGAAGATCTGGGATCAGTATAAAAAACA  
 TGTTAATAATATTTTTTATGGTAGGCGTGCTATTTTTTTGGGTATGGATTACATAA

>YHR111W 0.72 Cold

ATGAATGACTACCATCTCGAGGATACCACGCTCTGAACTTGAAGCATTAAAGATTGGAGAATGC  
 ACAATTAAGAGAGCAGCTTGCCAAGAGAGAAGACAGCAGCCGCGACTACCCATTATCTTTGG  
 AAGAATACCAACGTTACGGAAGACAAATGATTGTTGAAGAAACAGGTGGTGTAGCAGGTCAA  
 GTCAAGTTGAAAAATACAAAAGTTTTGGTAGTTGGTGCTGGAGGTTTGGGATGTCCCGCCTT  
 GCCCTACTTAGCGGGCGCTGGCGTGGGCCAAATAGGCATAGTAGATAACGATGTGGTGGAGA  
 CTTCCAATTTGCATAGGCAGGTTCTTCATGATTCTAGCAGAGTTGGAATGTTGAAATGTGAG  
 TCGGCCAGGCAATATATCACGAAACTGAACCCACACATTAACGTCGTTACCTATCCCGTTAG  
 ATTGAACCTCAGTAATGCTTTTGACATTTTCAAAGGTTACAATTATATATTAGACTGCACAG  
 ATCTCCATTAACGAGATACCTGGTGTCTGATGTTGCAGTTAATCTGGGAATAACAGTAGTG  
 TCTGCATCCGGTTTGGGAACAGAGGGCCAGCTAACTATATTGAATTTTAACAATATAGGGCC  
 ATGCTACAGATGCTTTTATCCAACACCTCCGCCACCAAATGCCGTGACCTCTTGCCAAGAAG  
 GCGGTGTGATAGGACCTTGCATTGGACTAGTTGGAACAATGATGGCTGTAGAACTTTGAAG  
 CTTATCCTAGGAATCTACACCAATGAAAATTTTAGTCCCTTTTGGATGTTATATTAGGTTT  
 CCCACAGCAGAGCCTGCGCACTTTCAAATGAGAGGCAGACAAGAAAAGTGTCTATGCTGTG  
 GTAAGAATCGAACGATAACAAAAGAAGCCATCGAAAAAGGTGAGATCAATTACGAACTGTTT  
 TGTGGCGCACGAACTATAATGTATGCGAGCCTGATGAGAGAATCAGTGTGGACGCATTTCA  
 GCGTATCTACAAGGATGATGAATTTCTAGCAAAACATATATTTCTTGATGTTAGGCCATCCC  
 ATCATTACGAGATATCTCATTCCCTGAAGCAGTTAATATTTCCAATCAAAAATCTAAGAGAT  
 ATGAACGGTGATCTTAAGAAACTGCAAGAAAACTTCCAGTGTAGAAAAAGACAGTAATAT

AGTGATTCTTTGCCGCTACGGTAACGACTCTCAGCTAGCTACAAGATTATTGAAGGATAAAT  
 TTGGGTTTTCTAATGTACGAGACGTGAGAGGAGGATACTTCAAATACATAGACGATATTGAT  
 CAAACCATTCTTAAATATTAG

>YCL002C 0.75 Cold

ATGCTTGTTATTGTTCTGCAGGGCTTGGCAGGTTTTTTTATCAATCATCGCCATTCTATGTCA  
 AAAGCGCTATAATAAACTTCATCGATCTATTTACGGGCTTTCATATGATTTATTTCTGCTAG  
 ATTTTGTGGTAATGGTCTGTACTTGTATTGCGCGTTGCATTATTGTTATTCATCTCTGGTG  
 AGGGAACAACCTGTCTCAAAGATTCCCCTTTTTTATCCGTTGAATGATGCCCGTAGTATACC  
 TATATCCAGTTTCCCTCATTCTAAAAGATTTTTGCGTTTTCTGTTGCTGCATGATGGTTTTAA  
 GGCAGTTATACTATTATAGGTCAACTAAACATATTTATCAGGGCATTTCATTACTTCCATA  
 ATAATTATAAGTGTGTTCCCTTGTATTAGGCATATTTACATATGGCTGTTCCATCTCTAATTT  
 ACCGTTGAAAAATTCAGGTAATTTGGCGTTTTCTATTTGGAACACATAAATTTATTTGTGGG  
 TAATGGCAAATCTGCTTAAATGTTTCAAGTATGTGCCTCAAATGAGTATAAACTGGATGGGA  
 TGCTCAACAGTAGGTTTATCATCAAAGTTTGCATTGATATCATTTTTGGCTGAATCTATCGA  
 TTTATTAGGTAGACTGGTAATACCGACCAATGCATTGTTTTACGAGATACCATTTAATTCAA  
 CGCCCTTTGGGTAATTTGATACAATTTGTCACCTATTGGTCATACTTTGTCAAGTTCAGT  
 ATGTTTACGTAG

>YIL015W 0.81 Cold

ATGCTGCAATTAATCATCTTTGTTTTGAACTTATTTTTGGCGAGTTTCGCGATTATTAACAC  
 CATTACTGCTTTAACAAACGATGGCACTGGTCACCTTAGAATTCCTTTTACAACACGAAGAGG  
 AGATGTATTACGCAACAACCTTAGATATAGGTACACCGTCCCAAAGTCTGACAGTGTGTTTT  
 GATACCGGATCTGCCGATTTTTGGGTTATGGATTCTAGCAATCCCTTCTGCTTACCAAATTC  
 AAATACGTCATCCTATTCAAACGCAACTTATAATGGCGAAGAAGTTAAGCCTTCAATTGATT  
 GCAGGTCTATGAGTACTTATAATGAGCATAGATCTTCCACCTACCAATATCTGAAAAATGGT  
 AGGTTTTACATCACATATGCTGACGGAACATTTGCTGACGGTAGTTGGGGGACGGAACCTGT  
 ATCAATTAATGGAATTGACATCCCCAATATCCAGTTCCGGAGTTGCCAAGTATGCTACGACAC  
 CCGTTAGTGGTGTCTTTGGAATTTGGGTTTTCTTAGAAGAGAGTCCGTTAAGGGCTATGAAGGT  
 GCTCCTAATGAATATTATCCTAATTTTTCTCAGATTTTTAAAAAGTGAAAAATAATCGATGT  
 GGTGCGTATTTCGCTGTTCTTAAACTCACCTGATTTCAGGTACTGGTTTCGATTGTTTTTGGTG  
 CCATTGATGAATCAAAGTTTTCTGGTGATTGTTTCACTTTCCCTATGGTAAATGAATATCCC  
 ACAATAGTCGACGCTCCTGCAACTTTAGCAATGACTATACAAGGATTAGGTGCCCAAACAA  
 AAGTAGTTGTGAACATGAAACGTTTACGACGACCAAGTATCCAGTTTTGTTGGACTCAGGAA  
 CCTCGCTATTGAATGCGCCCAAGGTCATAGCAGATAAAATGGCTTCTTTTGTAATGCGTCC  
 TATAGTGAAGAGGAAGGTATATATATATTAGACTGTCCAGTATCTGTAGGTGACGTGGAATA  
 CAATTTTGATTTTCGGCGATTTGCAATAAGTGTCCACTGTCTAGTTTGATTTAAGTCCCG  
 AGACAGAAGGCAGCTATTGTGGGTTTTGCGGTCCAGCCAACAACGATTTCGATGGTTCTGGGT  
 GATGTGTTCCCTGTCTCTGCATACGTCGATTCGATCTCGATAATTATAAGATATCTTTAGC  
 ACAGGCAAATTTGGAACGCAAGCAAGTTTCGAAAAAGCTAGTAAATATTCAAACAGATGGGT  
 CTATTTCAGGTGCCAAAATTGCTACAGCTGAACCCTGGTCCACCAATGAACCATTTACAGTC  
 ACCTCTGACATTTATTCATCTACAGGCTGCAAGAGTAGGCCTTTTTCTTCAATCATCGACAGC  
 CTCTTCGCTTATTGCAGAAACCAACGTACAAAGTCGCAACTGCTCTACGAAGATGCCAGGCA  
 CTAGATCAACTACTGTCTTAAAGTAAGCCTACTCAAATAGTGCTATGCATCAAAGTACAGGC  
 GCTGTCACACAAACCTCAAATGAACTAAATTAGAATTATCCTCGACTATGGCAAATTCGGG  
 CAGTGTCTCGCTTCCCACTTCGAATTCAAATAGACAAAGAGTTCGAACATTCGAAATCTCAA  
 CTACCAGCGATCCAAGTGTAGCAGAGCATTCTACGTTTAAACCAACGTTTGTACATGAACT  
 AAATATCGGCCTACTCATAAGACAGTCATAACAGAACTGTCACGAAGTATTCTACAGTCTT  
 AATAAATGTCTGTAAACCAACATATTAA

>YLR106C 0.82 Cold

ATGTCCCAGGATAGAATTTTGTAGATTTAGACGTAGTTAACCAAAGGTTAATTCTCTTCAA  
 TTCTGCTTTTCCCTCTGATGCTATTGAAGCGCCCTTCCACTTTAGCAACAAGGAATCAACTT  
 CTGAGAATTTAGACAATTTAGCAGGAACATACTACATAGCCGTTCCATCACTGGTCATGTT  
 TTCTTTTACAAACATATTTTTTTAGAGATAGTGGCACGTTGGATAAAGGACTCCAAAAAAA  
 AGATTACGTTCTTGAATTTGAAAAGTTGGCAAGTATAATTACAATATTTCCCGTTGCAATGC  
 CATTAATTGAAGACTATTTAGATAAAGAGAAATGATCATTTCATCACTATTTCTTCAAAATCCA

TCCACACAAAAGGATTCCGACATGTTTAAAAATACTATTAGCATACTATAGGTTACTATATCA  
 CAATAAAGAAGTATTTGCACGCTTCATTCAACCCGACATTTTATACCAACTTGTGGATTAC  
 TCACCAAAGAACAAGAAAATCAGGTTGTTATATTTCTAGCATTAAAGGTTTTATCTTTATAC  
 TTAGACATGGGAGAAAAACATTAACGATATGCTCGACACTTATATAAAAATCACGCGATTC  
 ATTGTTGGGCCATTTTGAGGGCGATTCTGGAATTGATTACAGCTTCCTCGAACTGAACGAAG  
 CTAAGAGATGTGCAAATTTCTCTAAACTACCCAGTGTTCCAGAATGTTTCACTATAGAAAA  
 AAATCTAGCTACTTCATTATTGAGCCTCAGGATTTGAGTACTAAGGTGCGCTCAATCTGTGG  
 CGTTATCGTCCCTAAGGTCCACACTATCCACGACAAAGTATTCTACCCATTAACCTTTGTCC  
 CTACTCATAAAACGGTTTCTCTCTTCGTCAACTCGGGAGAAAGATTCAAAATCAACTCCA  
 ATAATGCTCATTGGAAAAGCGGGATCCGGTAAAACCTTTTAAATCAATGAGCTAAGTAAATA  
 TATGGGTTGCCATGACTCCATTGTGAAAATTCATTTAGGTGAACAAACTGATGCCAAGTTAC  
 TGATTGGTACTTATACCTCTGGTGACAAGCCAGGCACGTTTGAATGGAGAGCTGGTGTCTC  
 GCTACCGCGGTCAAAGAAGGGAGATGGGTACTTATAGAAGACATAGATAAAGCTCCTACAGA  
 TGTTTTATCAATACTTTTATCGCTTTTGAAGGCGCGAACTAACCATCCATCCAGAGGAG  
 AGACTGTAAAGGCTGCAAATGGTTTCCAGTTAATATCAACTGTTAGAATAAACGAAGATCAT  
 CAGAAGGATAGTTCCAATAAGATCTATAACTTGAATATGATTGGTATGAGAATCTGGAATGT  
 TATTGAATTAGAGGAACCTAGCGAAGAGGATTTGACACACATTTTAGCCCAAAGTTTCCCA  
 TTTTGACCAACCTTATCCCCAACTAATCGATTCATACAAAAACGTCAAAAGTATTTATATG  
 AACACCAAGTTCATTTTATTGAACAAGGGGGCACACACAAGAGTTGTATCTGTAAGAGATTT  
 AATTAAGCTGTGCGAAAGGTTAGACATCCTATTCAAAAACAATGGCATCAACAAACCTGACC  
 AACTAATCCAGTCTTCTGTCTACGACAGTATTTTCTCCGAAGCCGCGACTGTTTTCGCTGGC  
 GCTATTGGAGAATTCAAAGCTTTGGAACCTATTATACAAGCAATCGGCGAGTCAATTAGACAT  
 TGCTTCTCAAGGATTTTCGTTATTTTTGACCCAACATGTGCCCACTTTGAAAACCTTGATG  
 ATAGCATTAAAAATTGGAAGAGCCGTATTACTTAAGGAAAAGCTAAATATACAAAAAAATCA  
 ATGAACAGCACATTGTTTCGATTTACGAATCATTCTTTAAGACTAATGGAACAGATTTCTGT  
 TTGTATACAGATGACTGAACCTGTTTTACTAGTCGGTGAAACGGGTACCGGGAAAACCTACAG  
 TCGTTCAACAACCTTGCTAAGATGTTAGCAAAAAAATTAACGGTAATCAATGTTTCCACAACA  
 ACAGAACTGGTGATCTTCTTGGTGGGTACAAACCCGTAATTTCTAAAACAGTTGCAGTTCC  
 TATACAAGAAAATTTGAAACTCTTTTTAATGCTACATTTTCTTAAAGAAGAACGAGAAGT  
 TTCACAAGATGCTACATAGGTGCTTCAACAAGAATCAATGGAAGAACGTTGTTAAACTTTGG  
 AACGAAGCGTACAAAATGGCTCAAAGCATATTA AAAATTACAAACACTGAAAATGAAAACGA  
 AAATGCAAAGAAGAAGAAAAGAAGACTCAATACTCATGAAAAAAATTTGTTACTTGACAAAT  
 GGGCTGACTTCAATGACTCAGTGAAGAAGTTTGAGGCCAGTCTAGCTCTATTGAAAACCTCG  
 TTTGTCTTCAATTTTGTGCGAGGTTCTTTGGTAAAGACTATCAGGGCTGGGGAGTGGCTATT  
 GCTCGATGAAGTGAATTTAGCAACCGCAGATACCTTAGAAAAGTATTTCTGACCTTCTCACCG  
 AGCCTGATTCTCGTAGTATTCTTCTTTTACAGAAAAGGGTGACGCTGAGCCTATAAAAGCTCAC  
 CCCGATTTTAGAATATTTGCTTGTATGAACCCCGCTACTGATGTTGGTAAAAGAGACTTACC  
 TATGGGTATCAGATCAAGATTTACCGAAATATATGTACATTCTCCGGAACGTGATATTACTG  
 ATTTGCTTTCCATAATTTGATAAATATATTGGAAAGTACAGCGTCAGCGATGAATGGGTAGGA  
 AATGACATCGCTGAACCTTACCTTGAAGCCAAAAAATCTCCGATAACAATACTATAGTTGA  
 TGGCTCAAACCAAAAACCACACTTTAGTATCCGTACCCTGACGCGTACATTGCTTTATGTTA  
 CTGATATTATTATCATATCTACGGTCTACGCCGTTCCCTGTATGATGGATTCTGTATGAGTTTT  
 TTGACTTTACTGGACCAAAAATCTGAGGCCATTCTGAAGCCAGTAATAGAAAAATTCACATT  
 GGGGAGGCTAAAAAATGTCAAGTCAATCATGTCACAGACACCTCCCTCTCCAGGACCAGATT  
 ATGTTCAAGTTAAGCATTATTGGATGAAAAAGGGCCCTAATACAATTCAAGAACAAGCTCAC  
 TATATCATTACGCCTTTTGTTGAAAAGAATATGATGAATTTGGTAAGAGCTACATCAGGCAA  
 AAGATTTCTGTGCTTATTCAAGGTCCAACCTTCATCGGGAAAACAGTATGATCAAATATC  
 TTGCGGATATAACGGGCCATAAGTTTGTCCGTATAAATAACCATGAGCATAACAGATTTACAG  
 GAATATTTAGGTACATATGTTACCGATGATACCGGAAAGCTGTCGTTTAAAGGAAGGTGTTTT  
 AGTCGAGGCACTACGAAAAGGATATTGGATTGTTTTGGATGAATTAATCTTGCCCCAACCG  
 ATGTTTTTAGAAGCCTTAAATAGGTTACTTGACGATAACAGAGAACCTTTTTATTCCAGAAACA  
 CAAGAAGTTGTACATCCTCATCTGATTTCTTCTTTTTGCTACCCAGAATCCACCTGGGAT  
 ATACGGTGGCCGTA AAATTTCTTCAAGAGCTTTTAGGAATCGTTTTCTGGAGTTGCACCTTCG  
 ACGATATTCGCAAGATGAATTAGAAATTATCCTACGTGAGCGCTGCCAAATGCCCCATCA  
 TATGCAAAGAAAATCGTTGAAGTATACCGCCAATTATCCATCGAACGTTCCGCTTCAAGGTT  
 GTTCGAACAGAAAAATAGTTTTGCAACTCTACGTGATCTTTTCCGCTGGGCTTTAAGGGACG  
 CAGTGGGATATGAGCAGCTTGCTGCCAGTGGCTATATGCTTCTTGCAGAAAGGTGCAGAACT

CCACAAGAAAAAGTTACAGTCAAAAAGACTTTAGAAAAAGTAATGAAAGTTAAATTAGATAT  
 GGACCAATATTATGCAAGTCTGGAAGATAAATCCTTAGAAGCCATTGGCTCTGTTACTTGGGA  
 CAAAAGGAATGCGCCGACTATCCGTCTTAGTTCCTAGTTGTTTAAAGAATAAGGAGCCAGTA  
 CACTGGTAGGTGAAACTGGGTGCGGCAAAAACAACAATTTGCCAATTATTGGCGCAATTCAT  
 GGGTCGAGAAGTATCACACTAAATGCCCATCAAAACACAGAACTGGAGACATATTAGGTG  
 CTCAAAGACCTGTTTCGTAACAGGTCTGAAATTC AATATAAGCTAATAAAAATCCTTAAAAACA  
 GCATTGAATATTGCTAATGACCAAGATGTAGACTTGAAAGAGTTATTACAGCTATATTCTAA  
 GTCAGATAATAAAAATATAGCCGAAGATGTTCAACTGGAAATACAAAAGCTGAGGGATAGTT  
 TGAATGTTTTATTGAAATGGAGTGACGGCCCTCTGATTCAAGCTATGAGGACGGGAAATTTT  
 TTTCTACTTGATGAAATATCGCTAGCAGATGATTCCGTTCTTGAAAGACTAAATAGTGT  
 GGAGCCAGAAAGGAGTTTGTGTTAGCAGAACAGGGTTCATCCGATAGCCTTGTAACGGCTT  
 CAGAAAACCTTCAATTCTTCGCAACCATGAACCCTGGTGGAGATTACGGTAAAAAAGAATTA  
 TCTCCAGCGTTAAGAAATAGATTTACTGAAATATGGGTACCATCCATGGAAGATTTCAACGA  
 TGTAACATGATCGTATCCTCAAGGCTTTTAGAGGACTTGAAAGATCTTGCTAATCCAATTG  
 TGAATTTCTCTGAATGGTTTGGCAAGAAGCTGGGAGGCGGAAATGCAACAAGTGGTGTCAAT  
 TCTTTACGTGACATACTTGCAATGGGTTGAATTTATTAATAAAGTGTTCGAAAATACAGAA  
 CAAGTCAACTGCCTTAATTCAAGGTGCCTCAATGGTTTTTATTGACGCCCTTGGTACAAATA  
 ACACTGCTTACTTAGCTGAAAACGAAAATGATTTAAAGTCACTTAGAACAGAATGTATTATA  
 CAACTATTGAAACTATGTGGTGACGATTTGGAAC TACAACAATTGAAACGAACGAAATTTAT  
 TGTGACTCAGGATGAATTACAAGTCGGAATGTTCAAAAATACCAAGATTTCCAGATGCTCAGT  
 CTTTATCCTTTAACTTAACCGCCCCACTACTGCCTCAAACCTTAGTAAGGGTTGTACGGGCT  
 ATGCAAGTACACAAGCCAATTTTACTTGAAGGTAGTCCAGGTGTTGGTAAAACAAGTTTAAAT  
 CACCGCTCTTGCCAATATTACAGGAAATAAGCTTACAAGAATCAATTTGTCTGAACAAAACGG  
 ATCTAGTAGATCTTTTTCGGTGCAGACGCTCCTGGT GAGCGAAGTGGTGAATTTTTATGGCAC  
 GATGCTCCGTTTTTAAAGAGCAATGAAGAAAAGT GAGTGGGTTTTATTAGATGAAATGAATTT  
 AGCCTCCCAATCCGTCTTAGAAGGGTTGAATGCCTGTTTAGATCATCGAGGCGAAGCGTATA  
 TCCCCGAGTTGGACATATCGTTTTCTCGCCACCCCAATTTTCTGGTCTTTGCTGCTCAAAT  
 CCTCAGTATCAAGGTGGTGGTAGGAAAGGTCTTCTCAAATCCTTCGTTAATCGATTTAGCGT  
 GGTATTTATTGACATGCTTACATCTGATGATCTCCTTTT GATTGCAAAAACACTTATATCCAA  
 GTATTGAGCCAGATATCATCGGAAAATGATTAAGTTAATGTCTACTTTAGAGGATCAAGTC  
 TGTAAGAAGAAAACCTTTGGGGTAATTTCTGGTTCAACCATGGGAGTTCAATTTGAGAGATACATT  
 GCGTTGGCTAAAGTTACTCAACCAATATTTCGATTTGCGAAGATGTGGACGTGTTTGACTTTG  
 TTGATATAATCGTTAAGCAGAGGTTCCGTACTATCAGCGATAAGAATAAAGCACAGCTTCTC  
 ATTTGAAGATATTTTTGGTAAATTTCTCAACTAAAGAGA ACTTTTTCAAACCTTACAGAAGACTA  
 TGTTCAAATTAACAACGAGGTAGCTCTAAGAAATCCCATTACCGCTATCCAATTACCCAGA  
 ATCTTTTCCCATTAGAGTGCAATGTGCGCGTTTATGAATCTGTTTTGAAAGCAATCAACAAT  
 AATTGGCCGTTGGTACTTGTGGGCCCTCAAACCTCCGGTAAAACGGAAACGATAAGATTTTT  
 AGCTTCAATCTTGGGTCCCAGAGTAGACGTGTTTTTCCATGAATAGTGATATAGATAGTATGG  
 ATATCCTTGGTGGTTATGAACAAGTTGATTTGACTAGACAAATATCATATATCACTGAGGAG  
 TTAACAATATCGTAAGAGAAATAATCTCGATGAATATGAAGCTCTCACCAATGCTACCGC  
 AATCATGGAAGGTTGAACTTATTGAAATATTTGCTCAATAATATCGTCAACCTGAGAAAT  
 TCCAAGATTTAGAAATCGTTTTAATAGGTTCTTTTCGCACTTAGAAGGGCATCCCCTATTA  
 AAACTATGAGTATGAATATTGAAAAAATGACTGAAATCATCACTAAGGAAGCTTCGGTTAA  
 ATTTGAATGGTTGATGGCATGTTGGTCAAAGCAGTTGAAAAGGGCCATTGGCTAATCTTAG  
 ATAATGCTAATCTTTGTTCTCCTTCTGTTCTTGATAGACTGAACTCTCTATTGGAGATAGAC  
 GGGTCGCTGCTCATCAATGAATGTAGCCAAGAAGATGGCCAACCAAGGGTTCTCAAACCCCA  
 CCTAACTTCAGATTATTTTTGACCATGGATCCAAAATATGGTGAATTTATCCCAGCTATGA  
 GAAACAGAGGTGTGGAGATTTATATCGACGAATTGCACAGTCGTTCTACAGCCTTCGATCGC  
 CTCACCCTAGGCTTTGAACTTGGAGAGAATATAGACTTTGTTTCTATTGATGATGGCATCAA  
 AAAAAATAAACTAAATGAACCTGATATGTCGATACCATTAAAACACTATGTTCCATCCTATT  
 TAAGCAGACCATGCATATTTGCACAAGTACATGATATTTTATTATTATCTGACGAAGAACCA  
 ATTTGAAGAATCTCTTGCTGCTGTTATTCCGATTTCCCATTTAGGGGAAGTTGGTAAATGGGC  
 CAATAATGTATTGAATTGCACGGAGTACTCAGAAAAAAGATCGCAGAAAGGCTTTATGTTTT  
 TTATAACATTTTTGACTGATATGGGTGTCTTAGAAAAGATTAATAACCTATACAAACCTGCA  
 AACCTAAAATTCAGAAGGCTTTGGGGCTGCATGATAAGCAATTGACAGAGGAAACTGTCTC  
 GCTTACCTTGAACGAATATGTTCTTCCAACAGTCAGCAAGTATTGAGATAAGATCAAATCTC  
 CAGAGTCGTTATACTTATTATCAAGTTTACGTCTGCTACTCAACTCTTTGAACGCTCTCAA

TTAATCAATGAAAAATCAACTCATGGTAAAAATTGACGAACTGACGTATATTGAATTATCTGC  
GGCTGCCTTTAACGGTGCCCATTTGAAGAATATTCCTCGCATTCCAATATTTCTGTATTCTCT  
ACAATATTTTAAACAGTAATGTCTGAAAACCTTAAGACGGAAAGTTTATTTTGGCGCTCCAAC  
CAATATCAATATTTATGGGATTTACTGGTAATTGTAATTGCAGCATTAGAAACCGCCGTTAC  
AAAGGATGAAGCACGTCTAAGAGTATATAAGGAGTTGATAGATAGCTGGATTGCGTCCGTAA  
AATCCAAATCAGACATTGAGATAACTCCCTTCCTTAACATCAATTTGGAATTTACCGATGTT  
TTACAGTTGTGAGGGGCCACTCCATAACTTTACTATGGGATATATTCAGAAAAAATTATCC  
GACAACCTCCAACAGCTGGCTAGCTTTGAAAAGCTCATTAATTTATCTGAAAAAATTGACA  
AAGTACGTCTGCTCCAATTTTCTGAATCATACAATTCCATTAAGGATTTGATGGACGTTTTTC  
CGGTTGCTAAATGATGATGTGTGTAATAATAAATTAAGTGAGTTAATCTCTTGCTATCAAA  
GTTAGAAGATGGTATAAATGAATTGGAACATAATTTCAAATAAGTTTTTAAACAAAAGAAAAC  
ATTATTTTGTGACGAATTTGACAATTTGATCAGATATACTTCTCAGTTGACACAGCCGAG  
CTAATAAAAGAACTTGCTCCCGCTTCTTCTTTAGCCACGCAAAAACCTTACAAAACCTATTAC  
CAACAAATACAATTATCCGCCATCTTTGATGTTCTTTGGACAGAAAAAATGCTAAATGGA  
CTTCTTTACTTCTACCATATTTTCATCCCAGTTTCTCGAAGATGTCGTTGCTAAATCTAAT  
AATTTGAAATCATTTTTCGGGAAATCAGATCAAACAATCTATTAGTGACGCAGAATTGCTACT  
TTCTCCACTATCAAGTGTTTACCTAACCTACTTAAGAGCCAAATGGAGTACTATAAAAAATA  
TGTTACTGTGATGGCTCAGAAAAGTTATTGATATTCACGTCGGCGGGGACTGCTTGAAAATTG  
ACTTTGAAAGAACTTTGCTCTCTCATAGAAGAAAAAAGCTTTCAGAGACACGCGTGACTTT  
TGCAGAATACATCTTTCCCGCTCTAGATTTGGCTGAAAAGTTCGAAATCATTAGAAGAAGCTGG  
GAGAAGCTTGATCACATTTGGTACAGGTTTGTCTGCTATTCGTCCAGATTCTCCCTAT  
GATCCGGCAATACAGATTACGTTTTTATATGATTTATTTTGAAGACAAAAGACATTTTCTCA  
AAACCTAATGAAAAGTTGGAGAAATGTTTCGTAAAGTAATCAGTGCGGATGAGGAGATTTTCA  
CAGAAAAACTTATCAATACCATAAGCGATGACGACGCACCTCAATCCCTTAGGGTATATCGT  
ACAGGCATGTCTATTGACTCTTTATTTGATGAATGGATGGCATTTTTGTGCTCAACTATGAG  
TTCTCGTCAAATAAAAGAGCTAGTGAGTTTCTACAAGTGCAATTCAGATCAATCGGATCGTA  
GATTAGAAATGCTCCAACAAAATAGTGCACATTTTTTGAATCGTCTCGAAAGCGGTTATTCA  
AAATTTGCTGATTTAAATGATATCCTCGCGGGATATATTTACAGTATCAACTTTGGCTTTGA  
TTTTATTGAAGCTTCAAAAATCTAAGGATAGAGCATCATTCCAATTTCTCCTTTATGGAGTA  
TGGACCCTATCAATATTTTCATGCGCAGAGAATGTTTTAAGCGTTATCATGAGCTGTCAAGG  
TTCTTCAAAGGGTGATATGGAAGATACTTCGATTGAAAAGTTTTTGATGTACTTCTTGAC  
GCTGTTTTAAGTTCATAAGAGGGATACAAATTTACTGAAAATTTTTGAGGCTGCTTTGTATA  
CTCTGTATTCAAGATGGTCTGTGAGACGTTTCAGACAGGAGCAGGAGGAAAACGAAAAGTCA  
AATATGTTCAAATTCATGATAATTCAGATGATTACGAGGCAGACTTTAGAAAGCTGTTTCC  
AGATTATGAGGACACAGCTTTGGTAACATAATGAAAAGATATTTTCGAGTCTGAAAATCTTG  
ATGACATCTATTTCAAGCTTGCCGACACATATATCTCGGTATTTGACAAAGATCATGACGCC  
AACTTTTCTTCTGAGTTGAAGAGCGGTGCGATAATAACAACAATTTTGAAGTGAAGATTTAAA  
AAACACCAGGATAGAAGAGTTGAAAAGCGGATCGTTGTCTGCTGTGATTAATACACTTGATG  
CAGAAACACAATCTTTCAAACACGGAAGTTTTTGGTAATATCGATTTTACCACGATTTTCC  
TCTATTCCGGAGTTTCAAAGCAGGTGATATCATTGAAACTGTGCTTAAGTCACTCTTGAA  
ATTGTTGAAGCAGTGGCCAGAACATGCCACCCTCAAAGAATTATATCGAGTTTCCAAGAAT  
TTTTAAACTACCCATTAAAACACCCTTAGCAAGACAGCTTCAAAGATCGAACAAATATAT  
ACATACCTAGCTGAATGGGAAAAATACGCTTCCTCGGAAGTATCCCTGAATAACACCGTTAA  
ACTGATTACAGATTTGATAGTTTCATGGAGAAAACCTAGAATTACGCACCTGGAAAGGTCTTT  
TCAACTCGGAAGACGCAAAAACAGAAAATCTATTGAAAATGGTGGTTTTATTTGTACGAG  
TCAATTGTCATTTCAAATTTTGTAGTGAAAAGAAGGAAACGGCCCTAACGCTACACTTTT  
GGTAAGCTCACTTAACCTATTTTGTAGTAAGAGTACATTGGGCGAATTCACGCCAGGCTAG  
ATCTTGTAAGCATTCTACAAGCACATTCAACTAATTGGATTGAGGAGCTCGAAGATAGCG  
GGCTTGCTCCATAACTATAAAATCTATTTATCAGTTCAAACCATTAATTGATGAGCGGAT  
TACGAATGGAAAAAGAGTCTGGAAAAAGAAATTGACGATATAATCTTTTAGCCAGTTGGA  
AAGATGTTAACGTTGATGCCCTGAAACAAAGTTCTCGTAAGTCTCATAACAACCTTTACAAA  
ATTGTCAGAAAAATACCGTGAATTTGCTAAATGGGGATGCGAAAACCATTAATTGAGGCCGGTCT  
TTTGTATTTCAAACGAAAATAAACTAAAACCTCCCTACTTTAAAACAACATTTTACGAAGACC  
CCAACCTAGAGGCTTCGAAAAATTTGGTGAAGAAATTTCTACTTGGAGTATGAGAGCTGCG  
CCATTAAGGAATATTGACACGGTAGCAAGTAACATGGACTCCTACTTGGAAAAGATATCATC  
ACAGGAATTCCTAACCTTCGCAGATTTAGCATCGGACTTTTATGCTGAAGCTGAAAGGTTAC  
GTAAGGAAACCCCTAATGTATATACAAAGGAGAACAAAAGAGGTTGGCATACTTGAAGACT

CAAAAAGTAAACTTTTAGGTGATGCATTGAAAGAATTGAGAAGAATCGGTTTAAAAGTCAA  
TTTTAGGGAAGACATTCAAAAAGTTCAATCTTCTACAACAATTTTTGGCAAACATTGCC  
CTTCAATAATGAATATTTAAATTCGTCAGACGCATTCTTTTTCAAAATCCTTGACCTTTA  
CCCAAGCTGAGAAGCGCTGCATCGAATCCAAGTGATGATATCCCTGTTGCTGCTATAGAAAG  
AGGTATGGCACTCGCACAGAGTTTGATGTTTTCCCTGATTACAGTTCGTCACCCTCTATCAG  
AGTTCACGAATGATTACTGTAAGATTAATGGTATGATGTTAGACCTAGAACACTTTACTTGC  
TTAAAGGGCGATATTGTTTCATCTTTCATTAAGCGAATGTAGATAATGTCAGATTGTTTGA  
AAAGTGGCTGCCCTTTGTTAGACTATGCCGCACAGACCTTGTCTGTTATTTCGAAATACT  
CAGCAACTTCAGAACAACAAAAGATCTTGTAGATGCAAAATCGACCTTATCTTCGTTTTTC  
GTACACTTCAATTCAGTCGAATTTTTGATTCTTTCATTTATCGAGTCATATTTCTAGATTGA  
GTTATTCATTAATGAATTATTGAAGAAGCTTGAAAATGCAAAGGAGACAGGGAACGCTTTCG  
TTTTTGATATCATTATAGAGTGGATCAAAGCAAATAAAGGGGGTCTATTAAAAGGGAACAG  
AAGAGAGGCCCTTCGGTGGAAAGATGTTGAAACAGGCTTTCGCGCTACTTTCACATCTATTAT  
ATTATCTTTCAGAAGGTAATTGGAGATGGAATTGAATCTATATCCGAAACTGATGATAACT  
GGTTATCAGCTAGCTTCAAGAAAGTTATGGTAAACGTTAAACTATTACGATCCAGTGTGT  
TCTAAAATATAGAGACAGCATTATCCTTGTGAAAGACTTTGATTTTACCCTACTGAATC  
AATTTACGTTAAATCAGTTATATCCTTTACACTACCGGTAATCACACGTTATTACAACGCAA  
TGACCGTGGTCTTGAAAGATCTAGAATCTACTACACGAACACAAGTCGTGGTATGTACATT  
CTATCGACGATATTGCATAGCTTAGCCAAAAATGGGTTCTGTTCTCCGCAGCCACCATCTGA  
AGAAGTTGACGACAAAAACTTGCAAGAGGGTACAGGCTTGGGAGACGGTGAAGGTGCTCAA  
ATAACAATAAAGACGTCGAACAAGACGAAGATTTGACTGAGGATGCACAAAACGAAAAAAA  
GAACAACAAGATAAAGATGAGAGGGATGACGAGAATGAAGATGATGCAGTTGAGATGGAGGG  
CGATATGGCTGGTGAATTTGGAAGATTTGTCTAATGGTGAAGAAAATGATGATGAAGATACTG  
ATAGCGAAGAAGAAGAATTAGATGAAGAAAATGATGACCTGAATGAAGATGACCCCAACGCT  
ATTGATGATAAAAATGTGGGATGATAAGGCAAGTGATAATTCAAAAGAAAAAGATACAGACCA  
GAATTTAGATGGAAAAATCAAGAGGAAGATGTACAAGCTGCTGAAAATGACGAACAACAGC  
GGGATAACAAGGAAGGAGGGGATGAGGACCCAAATGCACCTGAAGATGGCGATGAGGAAATT  
GAAAACGATGAAAATGCAGAAGAGGAAAACGACGTTGGTGAACAGGAGGACGAAGTTAAAGA  
TGAAGAAGGCGAGGATTTGGAGGCTAATGTTCTGAAAATCGAAACCCTAGACCTTCTGAAG  
ATATGAATTTAGATTCAGAGCATGAAGAATCAGACGAAGATGTTGATATGTCAGATGGAATG  
CCTGATGACCTAAACAAGGAAGAGGTTGGAACGAAGACGAAGAAGTCAAACAAGAATCCGG  
TATCGAAAGTGATAATGAAAACGACGAACCTGGTCTGAGGAAGATGCCGCGAGACAGAAA  
CAGCTCTTGACGAAGAAGAAGGTGCTGAAGAGGATGTGGATATGACTAATGATGAGGGAAAG  
GAAGACGAAGAAAATGGCCAGAAGAGCAAGCCATGTCTGATGAAGAAGAGTTAAAGCAAGA  
TGCTGCTATGGAAGAAAACAAAGAGAAAGGAGGTGAGCAGAATACAGAAGGTCTTGATGGCG  
TTGAGGAAAAGGCTGATACTGAAGACATCGATCAAGAAGCTGCCGTTCAACAAGATTCTGGA  
TCCAAAGGTGCTGGTGTGATGCTACGGACACACAAGAACAGGACGATGTTGGAGGTTTCAGG  
AACGACTCAGAATACCTATGAAGAAGATCAAGAAGATGTGACAAAGAATAATGAAGAATCAC  
GCGAAGAGGCTACGGCTGCTTTAAAGCAACTAGGTGATAGCATGAAAGAATATCATAGACGT  
CGTCAAGATATAAAAGAAGCACAACCTAATGGCGAAGAGGACGAAAATTTGGAAAAAACAA  
TGAACGTCGCGATGAATTTGAACATGTTGAGGGTGCAAACTGAAACAGATACGCAAGCTT  
TAGGTTCTGCAACACAGGATCAATTACAAACCATTGATGAAGACATGGCCATTGATGATGAT  
AGGGAGGACGAAGAAGTGGACCAGAAAGAGTTAGTAGAAGACGCCGATGATGAAAAAATGGA  
TATTGATGAAGAAGAGATGCTATCTGATATCGACGCGCATGACGCTAACAATGACGTTGACA  
GCAAAAAGTCAGGATTCATCGGTAAAAGAAAGAGTGAGGAAGATTTTGAGAACGAACCTTCA  
AATGAACACTTCTCGGCTGATCAAGAGGATGACAGTGAATAACAATCTTTAATTGAAAACAT  
TGAGGATAATCCACCTGATGCAAGTGCTAGTTTGACACCGGAAAGATCGTTAGAAGAATCCC  
GTGAATTTGTGGCATAAAAAGTGAATTTGACACCGCGATTTAGTATCACGCTTTGGAGAACA  
TTAAGACTAATCTTGGAACTACCTTGGCTACAAAGCTGAAGGGTGATTACAAAACAGGTAA  
GAGACTGAATATGAAACGGATCATTCCATATATTGCCCTACAATTCGGTAAAGATAAAAATCT  
GGTTGAGAAGAACTAAACCAAGCAAACGTCAGTATCAAATAATGATTGCGCTTGATGATTTCT  
AAGTCTATGAGCGAATCTAAATGCGTTAAACTCGCTTTTGATAGTTTATGCTTGGTCTCCAA  
GACGTTAACTCAGCTAGAGGCTGGAGGGTTATCTATTGTCAAATTCGGTGAAAATATTAAG  
AAGTTCCTCATTTGACCAACAATTTAGTAACGAATCTGGCGCAAGAGCTTTTCAATGGTTT  
GGTTTCCAAGAACTAAAACAGACGTTAAGAACTTGTGGCTGAATCTACTAAAATTTTGA  
ACGTGCTCGCGCTATGGTACATAATGACCAATGGCAACTAGAAATTTGTAATCTCTGATGGTA  
TTTGCGAAGACCATGAAACAATACAAAACCTGGTCCGCGTGCTAGAGAAAACAAAATATG

CTGGTTTTTGTTCATCATAGATGGTATTACTTCTAATGAATCCATCTTAGACATGAGCCAAGT  
 GAACTACATTCCAGATCAGTATGGCAATCCGCAATTAAGATTACCAAATACTTGGACACAT  
 TTCTTTTTGAATTTTATGTTGTTGTACACGATATAAGCGAACTACCCGAAATGCTTTCCTG  
 ATTTTGCCTCAATACTTTACAGACCTGGCATCCAGCTAA

>YOR067C 0.8 Cold

ATGAAAGGTGATCGTTCGAGGCAAAATATGGCTGTGACAAAAGAAGGCAAAAGTTAAAAAAAAA  
 TGACGAGCCAAAAAAGGTTTTGAAGACTGCCGCGACCGAAAAAGGTGAGGGATCCAAGCGCT  
 ACTCCTTATGGAATTTCTGGATAAGCACATTGTTTTTAAAATTACTATTGATTCCTGACTAC  
 TTCAGTACAGATTTTGACGTTTCATAGAAATTGGCTGGCAATCACCAATAAATTGCCCATCAG  
 CGAATGGTATTATGAGCACACTAGTCAATGGACATTGGATTATCCGCCATTTTTTGTCTTATT  
 TTGAATGGTTTTTATCGCAATTTGTTCCATAAATCTGTACGTGATGACGGTTGTTTTGGATATA  
 GTGGAGATCGGAAAGTTCGGTTTGCCAACAATCGTTTTTCCAACGACTCACTGTCATCTTCAG  
 CGAAATTTCTTCTATTTGTCATCCTTCAAATATACTTAATACTACAAAGCTAAGTAAAAGAT  
 CTCAAAGTTTTGTGGTTGCTTCTAGCATTGTACTATCACCCGGGTTTTTAATAATAGATCAC  
 ATTCACCTTCCAATATAATGGTTTTCTTTTTTGCATTCTAATAGGCTCCATTGTGCGCCGCAA  
 GAATAAGAGATACATCTTGTGCGCTGTTCTGTATACTACAGCCATATGTTTCAAGCATATAT  
 TTTTATATTTGGCGCCATGTTATTTTCGTGTTTTTATTGAGAGCATAACGTTCTCAATGTCAAC  
 AATTTCAAGTTTAAAAGTTACAAAGATTTTTTGTTCCTGATAAGATGGGCAAATCTTTTGAA  
 GTTGGCTACCGTTGTTGTTGGAATTTTCACTATTTGTTTCTTCCATTTGCTCATCAAAATGC  
 CGCAAGTGTGAGCAGGTTATCCCATTTCTCAAGAGGACTGACGCATGCATATTGGGCACCA  
 AATTTCTGGGCGTTGTATTCTTTTATGGATAAAATACTCACTACGGTAAATGTTGAAATTACC  
 GTACGTCCACACTTTTGCTACAAAATTTATTAACCTCCTCTGATCCCTCAGAATATCAAGG  
 AAATTAATGAAAAGCTCGCGGCAAACAACAATGGAAGTAAAGGTCTAGTTCAAGACGTATTT  
 TTTGTTATTCTCCCTCAAATTCCTCAAATAAACGTTTATTTTGACGATATTTTACCAGGT  
 CTTAGCAGTACTTCCACTTTTTGTTTGATCCATCGTTCAAAGATTTGTTGGCTCGTTGACTC  
 TCTGTGGGTTGGCATCGTTTTTGTTCGGGTGGCATGTGCATGAGAAAAGCTATAATGCTAGTC  
 ATCATTCGGTTCACATTTCTTGTGGATTTGATCGTCTTTTTGGTACCGTTTATGTTAGT  
 TGCCCTCAGCTGGTTATGTTTCTTGTATCCTCTTCTGTACAAAGGCCAAGATTTTTTTCATTA  
 AAACATTATACACTTATGTTTGGTGTATAAATTTATTTTGGCGTTTTTAGAAAACTACGAAG  
 ATTTCTTCAAGTGTAGAAAAGAAGTCTTTTTCTTGGATAGGTTGGCATTAAACGTACATCTT  
 TTCATTGTTACCAATCGTCACCGTATTACAAATATTGGATGAAGTCAAGTGGAGATATTCAT  
 TTTTGCAAAAATTTGAATTCCTTAGGATTAATGATATATAGTGTCTATTGTTTATTAGGTATA  
 ATCAGCTCGTGGTTTGCCTTATCGTGGTTATATAAATTTTGACGAATTACTATGGCAGTGA

>YKL004W 0.73 Cold

ATGGCAAACCCTTTTTTCGAGATGGTTTTCTATCAGAGAGACCTCCAAACTGCCATGTAGCCGA  
 TTTAGAAACAAGTTTAGATCCCATCAAACGTTGTTGAAGGTGCAAAAATACAAACCCGCTT  
 TAAGCGACTGGGTGCATTACATCTTCTTGGGATCCATCATGCTGTTTGTGTTTACTACTAAT  
 CCCGCACCTTGGATCTTCAAGATCCTTTTTTATTGTTTCTTGGGCACTTATTTCATCATTC  
 AGCTACGTCACAGTTTTTCTTCAATGCCTTGCCCATCCTAACATGGGTGGCGCTGTATTTCA  
 CTTTCATCGTACTTCCAGATGACCGCAGGCTCCTATTACTGTCAAAGTGTACCAGCGGTG  
 GAAACAATTTTATACGGCGACAATTTAAGTGATATTCTTGAACATCGACGAATTCCTTTTT  
 GGACATTTTAGCATGGTTACCGTACGGACTATTTCAATTTGGGGCCCATTTGTGCTTGCTG  
 CCATCTTATTTCGTATTTGGTCCACCAACTGTTTTGCAAGGTTATGCTTTTGCATTTGGTTAT  
 ATGAACCTGTTTGGTGTATCATGCAAAATGTCTTTCCAGCCGCTCCCCATGGTATAAAAT  
 TCTCTATGGATTGCAATCAGCCAACATGATATGCATGGCTCGCCTGGTGGATTAGCTAGAA  
 TTGATAAGCTACTCGGTATTAATATGTATACTACAGCTTTTTCAAATTCCTCCGTCATTTTC  
 GGTGCTTTTCTTCACTGCATTCGGGTGTGCTACTATGGAAGCCCTGTTTTTCTGTTATTG  
 TTTTCCAAAATTTGAAGCCCTTGTATTGCTTATGTTTGTGCTGGTTATGGTGGTCAACTATGT  
 ATCTGACACACCATTTTTGTAGACCTTATGGCAGGTTCTGTGCTGTCATACGTTATTTTC  
 CAGTACACAAAGTACACACATTTACCAATTGTAGATACATCTTTTTTGCAGATGGTCATA  
 CACTTCAATTGAGAAATACGATATATCAAAGAGTGATCCATTGGCTGCAGATTCAAACGATA  
 TCGAAAGTGTCCCTTTGTCCAACCTGGAACCTGACTTTGATCTTAATATGACTGATGAACC  
 AGTGTAAAGCCCTTCGTTATTTGATGGATCTACTTCTGTTTCTCGTTCGTCGCCACGTCAT  
 AACGTCCTAGGTGTAAAGAGGGCTTAA

>YNR063W 0.82 Cold

ATGGACAGATCTAAGGACGCTAGAAAGAGATCTATTAGTTTGGCCTGTACTGTGTGTAGGAA  
 ACGAAAGTTGAAGTGCATGGGAACAAGCCATGTGGAAGATGTATAAGGCTAAATACACCAA  
 AAGAATGCATTTATAATATTGATAAAAAGGAAAAGACAAGAGAAAAATCAAAAACGGGTCTGAAG  
 GTTTTTTTTATTCAAGAATAATACTATCGATAACGGGAATAACTCTATACTAGAGAACAAAGG  
 ACTAAATGAAGACCTTTCTTCTCATATATATGAGAAAGAAGCGCCAAAATTCGATTCAGATA  
 TTGATATATCAAGATTTGGCACAAATGATGCTGTGATTTTTAATAATGACGGGTGGGACACT  
 TCTCTTCCGATCGATTTTGATTTTCGATGAGTTTAACACTGAGACAACAGATTTTCGATGACTT  
 TTTAAAACATATTAGGCGATAATTCACCTTCAAAGGAACAAAAAAGTCTTTCCTATTACCTA  
 CTGCTACAGGCTTAAGCGGTGTGGTTAAAGAACTGAGAGCGAAGATAACGCTCCTACGAGG  
 TCTCGGCTAATCGATGTCTTGTGTTGAGAACAAGCTTCACTCCGTACCAGGAATATCAAAATG  
 GCATCTATATGAGCTGGAATCCCAATACCCAAATTTGGAATGTACAGAAGGAAATAGTGATG  
 AAAAGTTTTTACTTTCAACTGTATTGTGCCCTGGGGTTCGTTGACCATAACGAAAAGGGAACTA  
 TTGAATCATTGCAACATAGACAATCGTCCACTTTTGCCGGAGAATAGTATTTCAAACTGAC  
 CACTGATGCTTTTAAGTACTATAATGCTGCGAAAACGCTTGTTCGCGACTTGTATCTCATC  
 CCACAATCGATGGATTTTGCGGCCTCGTTCTAATGGCAAAATTTTCATGACGATGATGATATCC  
 TTAGAGCACCAATTATATTTGAGTATAAATGCTTTACAACCTTGCTGTGGCTTTAAACTTGAA  
 CAACAATACAAAATGCAAGGAATTACTTGAGTGAACAGCGACGGAATTGGTGTGATCTTGC  
 TTTTTTGGAAACATTTGGTGTCTTCTTTCGATGTTGGCAACAATTCATGGAAAAAATCCTTTT  
 ATCACTTTTGGAACAAATTACAACACCTCTGCCGTGTGAAATATCCCCCGCAATAAACTAA  
 TAAACTTTTGATAGATTTTCATGCAATCAGAATCAAGCTAGCCACTCTACAAAGTAAGATTT  
 TTCAACGGCTATATACTTCCAGCACCGCAAACGAGGTACCATTTCGTAAACTTAGAAAAGAGAA  
 TTTGAGGAGGTTTCACTCCAGATTACCAGGTTAAAAGGCTTTCGATATTCGAAGAACATCT  
 TTTTACAGGAGCAGAGTCTTAATGTTAGAGCTATCATGTTTAAGAGCTCAAGCTTCTTTTC  
 TATTATATCGTCCGTATCTGATCACTGGAGAATCCTTACAAGCAGTAACCATGGCAAAAATCA  
 ATAATTCACGAAAATATGGAGTCAATACACTAAACAGTTTCCCGATAACGAAAAGGAAAAGGCA  
 TGAACGTTTGGATTGGAATTTTTGTTATCCTTTAAGAACAGCGTCACTGACATTATGTATTT  
 CATGTATTATACTCCTAAGGTATAAGCAGGTGGTGCAGTTCCTTAAAGGTACTGAACTATTT  
 GAATACATTCTAGCATTGGAAAATATTGCAAGATTTAGTTCAGGTACTTCTTATTGAACAAA  
 CCTTATTGATATAATCAAAATATCCGATCAGTCCAGTACAGCTGAGTGGTGATAGCTTTGTCTG  
 AATTTTGGGGTCGCATACTTTACTAA

>YCL063W 0.79 Cold

ATGGCAACCCAAGCCCTAGAGGATATCACGGAGAGGCTTTTAAATAAGGTCGCAAGAGGCTAT  
 CTTGCAATTAGATCTGTGGATAACAACGTCAGCAGAGATCATCAATATGCCAGACAACAGATC  
 AAGAGTCATTGGATAAGTTATCCCAACAGTACAACCAGTATATGTCTCAACTGAACTCTTTG  
 TATGTTAGATCGGAATCTGTTTCGAGACAAGTTGAGCAAGGAACAACAACGCAGATTGATCAC  
 AGAGGATAATGAGCATCAACGCATAGAAGACTTGGTTCGTGAATTCCAGGATATCACTTTGA  
 GTTGAAACGAGCTGGCCACCGTCCCAAATGAAGCGCCTAATGATTCTCCACAATCGCAATCC  
 ACCAGAAGTAGTTTAGGGTCAATTTCAACCTCGACCATTGAAAATAAATTGAGAGGCAACGCTCT  
 GTGTATGGTAACTCCATCGAAACCACCAAAAAAATCGGTAGGCTTTAACCCCATCAATGAAG  
 TCGATTGTCCTTCGAAAACCTAATCTTTACCGTGTCTCACCTAAAAAACAACCTGCAAGAAAT  
 CGCACTTTACGTGCAGCCAAATCACATGATACTGGCTTGAACAAAAGTAAGAAACCGTCTTC  
 CTCGGATACGTATGAGTCTTTCTTCAAAAAATAGACAAAGACTTTTCGTTGACCTTCTTTGATG  
 AAATGGATGATGAAGATTTTGATTCTGATCAAGATACTATCATTCTACCAAACATAAGTACC  
 CCTCCACATGTTGGTGTGACCGCAAAGGGTGTGAATTTCGAACCTTTAAGGAGATATAACTC  
 TCACGAAAGTATACTATCTAACAACACAGCACCTTCTAAGTCGCTCAATCTGGGAAGTTTCT  
 CCGCTCATTCTTCAGGCCATCTAATCCGACGTTTGGAACTTCGATATCAAATGTCCAAGTG  
 AACTGTCATCCAACGTTGTCAGCGACAATGGCTCCTAGTCGTAATGGTCCCTCGTATTTCAAG  
 TTCTAAGGCGTTGTTATCATCATTTCATTGCACGATCAGATACACATACGGTAAAAGAGAACA  
 ACACAAATCTTAAGCATGCATCTTTTATGGATAAGTTTAAATTCATCGTTAAGCACAAATATCA  
 GAATCTTTTCAAAGTAAGAGGGGGGAGAAAGAATAAGGGCATGAATGAAGAACGAATATCAA  
 TCATAATGTAGCACAGGAACAAAAAATAATATGGATATAAGCGTCTCTATAGAAGAATTGC  
 AAGATGCTTTGAATACAGAAGTCTGTTTTAA

>YHR060W 0.79 Cold



ATGAGTGAACAAGGATGGCACAGAACATGGATACTACAGATGAACAGTACCTGAGACTTAT  
 TGAGCTACTCTCAAACCTATGATTCCACCTTAGAGCAGTTGCAGAAGGGGTTCCAGGATGGCT  
 ACATCCAATTGAGCAGATCGAACTACTATAATAAAGACTCATTACGAGGAACTATGGTGAA  
 GATTACTGGGATGAAACGTATATAGGTCAACTAATGGCAACAGTGGAAGAAAAAACTCCAA  
 GGTAGTTGTGCGAAATCGTCAAAAAGAAAAGCTCAAGATAAGCAAGAAAAGAAAGAGGAAGAAG  
 ATAATAAATTGACTCAGAGAAAAAAGGAACGAAGCCAGAAAAGCAAAAACTCAGAGTCAC  
 AAACTTAAACAAGACTACGACCCAATTTTGATGTTTGGTGGAGTACTGTCCGTTCCCTCTTC  
 ATTGAGACAATCGCAGACAAGTTTCAAAGGTTGTATTCCCTTAATAGCCCAATTGATTAATT  
 ACAAGAACGAAATATTAACGTTGGTTGAAACGTTGTCTGAGCAGGAATAA

>YPL215W 0.78 Cold

ATGATGTCAGTCAATAGATTTACTTCAGGTCGACTCCCTGTTTTCCCTTAGAAAGTCCCCTTT  
 TTACTACTCGAGAGCTTATTTGCATCAAACATGTGTTTTCAAGCAAAAATAAAGAACTGCAC  
 AAGATTCGCCAGAGCTTTTAGCAAAAAGCTCACATCTGAATTCGAAACCTAGATGTAAGC  
 AATAAAGCACCAGTGAAAAGCTGCTCAGAATAAAATTCCTCTAGCTCATAGTAAATATGAATC  
 GTCAAAGTACGAACTTCCCAAAATGGAAAGAAGCCTTGGGTGAACTAGTAATTCGAGCATTTT  
 ATTTAGATATGGATAGAGTGAGGGCAGGGCCCGTTGCAGGATCTTACTATTATAAAATTTGT  
 AAAGAGCAAGGTTTACAATACGAGGACGAGCCATTATCAGAACTGCTAAATACTTTTACGA  
 GGATTTGAAGCTACCACGTACTTTTTTCACAATGGTTTTCAAATCACTGTATTGCACGAGTGGA  
 TACTTTTTGTACGTATGAGAGCCATGCCTTTCAAATACGGCAGAACTATCAGCAGAAATG  
 GTAGATAGAACATTTTCTGACATGAGCTGAGATTATTCGAGGAAATGAAAGTTAATTCCTGG  
 TAGAATCGCAGATCAATATTTGAAAGATTTCAATACGCAATTAAGAGGAGCGATATTTGCAT  
 ATGATGAAGGATTTGCTACAGATGATGGTACACTTTCGACAGCTGTCTGGAGAAATCTTTTT  
 GGTGGAAGAAAGAACATTGATATGGTTCATTTAGAGTCTGTTGTGAGATACATTTATTCTCA  
 ACTATATGTTCTAAGCAGGTTATCAGACAGAGAGTTTGCACAGGTAAATTCAGTTTGTTC  
 CTCTGGGGTGAAGGTCGAAAACTGACACCAAAGCAAGAGGAAGAGTTGAAGGCCAAGACC  
 ATTGCAAAATATGAAGCTCTAGACAAGGATCCTAAACCTTACCAAGCGAGAGAAGTAGGCT  
 GTCATATACAACTAA

>YCR037C 0.79 Cold

ATGAGATTCTCACACTTTCTCAAATACAACGCTGTCCCTGAATGGCAGAATCATTACCTAGA  
 TTATAACGAATTGAAAAATTTGATCTACACATTACAGACAGATGAATTGAAACAAGAAACGC  
 CAACCGGTGACTTAAACGATGACGCTGACTCTCAGACTCCAGGTCCAATCGCTGATATAGAA  
 AGCAACATAGCTGCAGGAGAACCATCTTCATCGAAAAGAAGATTTACACATAAACTCAAGCG  
 TAAGCTCTTTGGTTCTAAAACACCTTCAGGAAGCAAAAAGGGGAGACTCCGACGAAAAGCCA  
 TAGATGGGAACAATATTAACGAGGAAACAATTGAGTTAGACGAGTTATCTCCTCAAGGGAAA  
 ACCACCTCTTTCAATAAGAATTTTATACGTAAGAAATTCCTTGAATCACGCAGCTCATCTGT  
 GAGTAGCGAGGGAAAGACGCTCTTCAGTTCTTATGATACATTCGTAACCTAACCTGAGCGACG  
 AGAAATTGAAAGTAGATGATTTCTACAAAAGAATGGAAGCTAAGTTCTATGAAAGATTTGAC  
 CACTTGATTAATGATTTGGAGAAGGAAGGCATTGTAACAAGATTGAATGAACTTTCAATCC  
 TGAAATTCAAGCATTGCCTCCTTTAAGAGAAAATTTCTGTTACATCAGAGACACATTCAT  
 CTAATAACCCATTTGAAATACACTCTTCAAACATCGACAGTGAATTGAGAAATAGGTTTGAT  
 TACAGCGAAGAAGAAATGGATGAAGATGATGACGTTGACGTGTTTGCTGACACTACCGACAA  
 TACCGCCCTCTTGAATTATTCGCAATTTAACAATTAATCTCAGAAAAAGTCATTATTAANAAC  
 AGACAATAATAAATCTTTACATAGACCTTTGCCAGTTGAAATCTTTTATCGAATTGAACAGA  
 ATGGGTTTCAGTAAAATTACTAAGAAGTCTGATAAAGTATTGCACATGAACACTAGGCAAGA  
 ATTAATAGAAAGTGAAGAATTTTCAAAGACACCTACATCTTCCAGCATGAACTTTAAGCA  
 GTTTAAACAGTAAAATTGCACAACCTTATTGAATTTTATGCTGTTCTCATGGGTGAGCCTGGG  
 AACGTAGATTCATGCAAGCAAGAGTTAAAGTCGTACCTGCACGACCACATGTTTTGGGAAAG  
 AAGCAACACATGGAAGACATGTTGGGCCTCTCTTCGCAAAAATAACGATATAATAACTATTG  
 AAGATGAAGCTGAGAACTTATGCAAGAAAAGCTTCAAATGAAATTTCAAGTATCCATTG  
 CCTAAGCCAATTAATTTGAAGTTTACTAAAAATGAAAATTTGGCAGTTCCTAAGCTATTTTT  
 TGGGAAAAGAGCAATGAAAATAGGCTTCATTATCATTGTCACAGGTGTTTTGTTGGGTGTTA  
 AAACTTTCAATGACCCTGTGCAACACCGGTGTATGGCATTGGTGAATGCTGTGCTTTCTTA  
 TGGGCTAGTGAAGCCATTCCATTACACATCACAGGTTTATTGGTTCCCTTCTAACTGTCTT  
 TTTTAGGGTACTAAAAGACGATGACGGTAAGGTAATGGGAGCAGCAGCTGCCTCTACAGAAA  
 TCTTAGGTACAATGTGGTCGTCAACAATTATGATTTTATTAGCAGGTTTACATTGGGTGAA

GCCTTGTCGCAATATAACGTTGCGAAAGTTTTGGCATCGTGGTTATTGGCCCTTGCAGGTAC  
 CAAGCCAAGAAATGTCCTTTTAATGGCAATGAGTGTGTATTCTTTCTTCGATGTGGATTT  
 CCAACGTTGCCTCCCAGTATTGACATATTCTCTATTAACACCCTTACTAGATCCGCTGGAC  
 TACACTTCACCGTTTGCTAAGGCATTAGTCATGGGTGTTGCACCTTTCGGCAGATATTGGTGG  
 TATGGCTTCACCTATTTCTTCGCCACAGAATATCATCTCCATGCAGTACTTAAACCTTATG  
 GAATCGGCTGGGGGCAATTTTTTGCTGTGCTCTGCCTACAGGTATTCTATCGATGCTGTGC  
 TCCTGGGCCTTGATGATACTCACCTTTAAAAATAGGCAAAACATAACTGGAAAAATTTAAACC  
 AATAAGGACCAGATTTACTATAAAGCAATATTTTATCATCATTGTAAC TATTGCTACTATTC  
 TTCTATGGTGTGTAGAGTCACAAATAGAAAGTGCTTTTGGATCGTCCGGTCAAATTGCAGTA  
 ATACCGATAGTCTGTTTTTTGGTACAGGTCTACTATCAACAAAGGATTTCAACACATTCCC  
 TTGGTCAATTGTTGTTCTTGCTATGGGTGGTATAGCCCTTGGTAAGGCAGTTTCATCTTCAG  
 GCTTGTGGTAACTATTGCAAGAGCATTACAAAAGAAAATTCAGAACGATGGTGTTTTTGCT  
 ATCTTATGTATTTTCGGTATTTTAATGTTAGTTGTGGGCACTTTTGTCTCACATACTGTGTC  
 AGCAATCATCATTATTCCCTTGGTGCAAGAAGTTGGTGACAAATTATCCGATCCAAAGGCAG  
 CTCCAATTCTTGTGTTTCGGTTGCGCCTTGTTAGCCTCATGCGGTATGGGGTTGGCTTCATCT  
 GGATTTCCAAACGTTACTGCTATTTCTATGACCGATAAAAAGGGTAATAGATGGCTAACTGT  
 AGGCGCTTTTATCTCCAGAGGTGTTCCCTGCTTCGTTGTTAGCGTTTTGTCTGCGTAATTACTC  
 TCGGTTATGGTATTAGTTCTTCCGTCTTAAAAGGTAGCACTTAA

>YJR160C 0.73 Cold

ATGAAAACTTATCTTTTCTCATAAACAGAAGAAAGGAAAAATACAAGTGACTCGAATGTATA  
 CCCAGGAAAGGCTAAGTCGCATGAACCCAGCTGGATAGAAAATGGATGATCAAAC TAAGAAGG  
 ACGGCTTAGATATTGTTTCATGTTGAGTTCAGTCCGGATACAAGAGCGCCAAGCGATAGCAAT  
 AAAGTAATAACAGAGATATTTGACGCTACTGAGGATGCCAAGGAGGCAGACGAAAGTGAAAG  
 AGGAATGCCACTTGCACAGCATTGAATACATATCCCAAGGCAGCAGCTTGGTCACTATTGG  
 TCTCTACAAC TTTAATCATGGAAGGGTACGACACAGCTATTCTTGGAGCTTTCTACGCCTTG  
 CCTATTTTTT CAGAGAAAGTTTGGCTCACAAAATGACAAAAC TGGAGAATGGGAAATTT CAGC  
 GTCATGGCAAATCGGGCTGACCTTATGTTATATGGCAGGTGAAATTTGTGGGGCTACAGCTAA  
 CGGGGCCCTCCGTGGATCTTGTGGAATCGTTACACATTGATTATTGCATTGTTTTTTTTTA  
 GCTGCCTTCACTTTTATACTGTACTTTTTGCAATAGTTTAGGCATGATTGCTGTGGGACAAGC  
 ATTGTGCGGGATGCCATGGGGTTGTTTT CAGTGTTTGACGGTGTCTTACGCTTCTGAAATAT  
 GCCCATTGGCTCTGAGATATTACCTTACAACCTATTCAAAC TTTGTGCTGTTATTTGGACAA  
 CTTTTTGCAGCTGGAATCATGAAAAAT TCTCAAAAAAATATGCGGATTCAGAATTAGGATA  
 TAAACTACCATTGCCCCTACAGTGGATTTT GCCAGTTCCCTTAGCACTGGGAATTTTTTTTG  
 CACCTGAATCTCCATGGTGGCTAGTTAAAAAAGGAAGGTTTGATGAGGCAAGGAGATCACTT  
 AGAAGAAC TTTAAGCGGCAAGGGACCTGAAAAAGAAATACTAGTAAC TCTGGAGGTGGACAA  
 AATAAAAGTGACTATAGATAAGGAAAAGAGACTCACAAGTAAAGAAGGCTCCTATAGTGATT  
 GTTTTGAAGACAAGATTAATCGAAGAAGAACGAGAATTACTTGTCTCTGCTGGGCTGGTCAA  
 GCCACTTGTGGTTCAATACTAATAGGTTATTCAACTTACTTTTACGAAAAGGCTGGCGTTAG  
 TACTGAAATGTCCCTTCACTTTTAGTATTATTCAATACTGTCTCGGTATTTGTGCTACATTT  
 TATCTTGGTGGGCGTCAAAGTATTTTGGTAGATATGACCTTTACGCTTTTGGACTAGCCTTC  
 CAAACCATTGTTTTTTTTCAT TATTGGCGGTTTGGGGTGCTCAAGTACGCACGGTTCCAAAAT  
 GGAAGTGGTTCTCTTTTAAATGGCTGTAGCATTTTTTTTACAATTTAGGAATTGCCCGGTCG  
 TTTTTTGCCTAGTCTCTGAAATGCCATCTTCAAGACTAAGAACGAAAACAATCATTCTAGCA  
 CGTAACACTTATAATGTGGTCAGTATCATATGTAGCGTTCTCATCTTATACCAACTGAACTC  
 TAAGAAGTGGAACTGGGGCGCTAAGTCAGGCTTTTTTCTGGGGTGTCTTATGCTTTTGTACTT  
 TAATCTGGGCTGTGGTTGACCTACCAGAAACTGCCGGAAGACTTTCGTGGAATAAATGAG  
 TTATTTAAACTTGGAGTTTCTGCAAGAAAGTTCAAATCGACGAAAGTAGATCCGTTTGTGTG  
 CAAAACCCCCCTAAAGACGTCTCTCATAACGACCCCAAGGGAGATATCGAAGCTTCCATTG  
 CAGAGGAATAG

>YGL153W 0.81 Cold

ATGAGTGACGTGGTCAGTAAAGATCGTAAGGCATTGTTTCGACTCAGCAGTATCCTTTTTTAA  
 GGATGAGTCCATTAAAGATGCTCCACTTTTTAAAGAAAATCGAATTTTTTAAATCCAAAGGGT  
 TAACAGAAAAGGAGATTGAAATAGCCATGAAAGAGCCCAAGAAAGACGGTATCGTAGGCGAT  
 GAAGTATCGAAAAAATTTGGTAGTACTGAGAATAGAGCCTCACAGGATATGTATCTCTATGA  
 AGCGATGCCACCAACGCTGCCCCACAGGGATTGGAAGGACTATTTTGTGATGGCTACTGCCA

CAGCTGGGCTGTTGTATGGTGCATATGAAGTAACTAGAAAGGTATGTGATACCAAATATTTTACCAGAAGCAAAAAGCAAGTTGGAAGGGGACAAAAAGAAATTGATGATCAGTTCTCCAAAATCGATACAGTCCCTCAATGCCATCGAAGCGGAGCAAGCTGAGTTTAGGAAAAAGGAAAGCGAAACATTAAGGAACCTAGTGACACGATTGCTGAACTGAAACAGGCGCTTGTGCAGACAACAAGAAGCAGGGAAAAGATCGAAGACGAGTTTAGAATAGTTAAACTCGAGGTGGTCAATATGCAAAATACGATCGACAAAATTTGTTTCAGATAATGACGGCATGCAAGAGTTAAATAATATCCAAAAGAAATGGAATCTCTGAAAAGCTTAATGAATAACCGTATGGAATCCGGTAATGCGCAGGACAACAGATTATTTTCCATATCTCCTAATGGTATACCTGGCATAGATACGATTCCATCTGCGTCTGAGATTCTTGCCAAAATGGGCATGCAAGAAGAAAGTGATAAAAGAAAAGGAAAACGGCAGCGATGCTAATAAAGATGACAATGCTGTTCCAGCGTGGAAAAAAGCAAGAGAACAACTATTGATAGCAACGCCTCCATTCCAGAATGGCAAAAAAATACCGCCGCAATGAGATCAGTGTCCCTGACTGGCAAAATGGACAGGTCGAAGACTCCATCCCATAG

>YNL228W 0.78 Cold

ATGGTTTGGTGTCACTATATTCTTTTGGTCTTGACTTTCTTTCTTTTCACTACGTTTTTTCAC TGCCGCATGCCCTGCTATCTTCACGTGGTTGAATAGCTTATTTGACTATCAAATGATTCTC CGCATGTAGTGCACACCTCGATCGCGGAGGTTGGAGACATAGAGGACGGTAGAGTCGACAAG GACGGAGTGTCTTTTGTGGATTTAGAATTTCTTTTAGGTTGTTTGCCTTTTCTTTTTCGC TTTAGTAGACCAATCTTCATCGTCATCCGTTTGTAAAGCCCTTGTCTCCTAGTGATGCCAAA GATCATCCAACCTCATTACTCCGTTTGTCTTTAGTATCATCGAACGATTCAGATTCTCTGTT TCTGTGTCAACCTTTGCTTTTTTTTTCTTTTTCTTTTTCTTTTTATTCTTCGTATTCACATG TACATTTTTCATCCGAACTGACGTCTTCTACCTCTATATCCATTTCTATGTTGAGATTGTCAT CTTCACTTTTCTGCTTTCAGAAGACGATTCTGCCAGTTTTCTTTCAATTTTCAGCGAGTTCAGCT TGCAATGCTTGCAGATCAATATCTTCTTTTTCTTTAACTTTTCATCTGCTGAATCAAATTT CTCGAGATCGGAGAGATTATCCAACCCAAGCGTTATGTTTTCTTCTTCCATTTCTTTCCGTA TCTCTTCCATATTTTTCTTATGCAGTTTAGTGTTTTATGTGGTTTTTTCAATTGCTTTTTCCGAC TTAAATGTCTTGTGTCAGATAAAACACTCGTAA

>YIL020C 0.81 Cold

ATGACGAAGTTTATTGGTTGTATAGACCTGCATAATGGAGAGGTTAAACAGATTGTAGGTGG AACGTTAACGAGCAAAAAGGAGGACGTTCCAAAACCTAACTTTGTATCACAACATCCTTCTT CATATTACGCTAACTTTTACAAAGACAGAGATGTCCAAGGATGTCATGTTATTAAGTTGGGA CCTAACAAATGACGACGCTGCACGCGAGGCACTCCAGGAGTACCACAATTTCTACAAGTGGG CGGAGGAATTAATGATACGAACTGTTTGGAAATGGTTAAAATGGGCCAGTAAAGTAATTGTTA CGAGTTGGCTATTTACAAAAGAGGGTCATTTTCAATTAAAAAGGTTAGAAAGACTGACAGAA CTATGTGGGAAAGACCGCATTGTTGTAGACTTAAGCTGTAGAAAACCCAGGACGGTCGTTG GATTGTGGCCATGAACAAATGGCAAACCTCTAACTGATCTTGAGCTTAATGCTGACACTTTCA GAGAATTGAGGAAATATACAAATGAGTTTCTAATTCACGCTGCAGACGTTGAAGGTTTGTGT GGTGGTATCGATGAATTATTGGTTTCTAAGCTTTTTCGAATGGACCAAAGATTACGATGATTT GAAAATCGTTTATGCTGGTGGGCCCCAAAAGTGTGATGATTTGAAATTAGTAGACGAACATAA GTCACGGAAAAGTAGATTTGACATTCGGTAGTTCCTTAGATATATTTGGTGGTAACCTAGTT AAGTTTGAAGACTGCTGTAGATGGAATGAAAAGCAAGGTTAG

>YLR104W 0.8 Cold

ATGAGTCAAAGTCGCTGGAGTATCGTTCTCATCTTTGCATTGTTTATTTTGGCAGCACTGG AGTGAATGCCTTCTTCAATTTTCGGTCATCATCAGCAACAGCAACAGCAACAACATCAT ATGAAGATCAAGTTTTAAATAACCCTTGTGATGGGTATTTGTGTCCGGACACCCTAACGTGC GTTGCACAGCAGAAAGACTGTCTTGTCCCTTCCCTAAATCTCAGTTGAAATGTGTCTTCC TGATAATAAATTTGTTTGCATATCCAAACCAGCCACACACAATGAAAAGTTTAGAGCAATAT ATGATGACCCTGTCAAGGGCCCCAAAGCAAAGAACAAGGGGTTTAGGGATTGTGGATGGGTA TCAGATGCTTACAAAACCATTTGA

>YDR291W 0.78 Cold

ATGGAGGAAGGACCTATCAAAAAGAACTGAAGTCAGCAGGTCAAGGGAGTGGAAGACCGA TGCCTTTAGAAATTTTGAACAATTTTTTTTTCCGCCTTAATACTCTTTACACCTTTTTGATTT GCAGAAAGCATGTTGTGCCTACATTTAAAACACTTTGTGGACCTATAGAACTGCTTTGAAA AGAACTGTGACGAAAGAAGACCTAGCCATGGTTATGGCGCTAATGCCAAGAGAATGTGTTTT

CAAGTATATTGATGAGAACCAAATTTATACTGAAACTAAGATTTTTGACTTCAATAATGGCG  
 GCTTTCAGCAGAAGGAAAATGACATATTTGAACTGAAGGACGTTGATGACCAAATCAGACT  
 CAAAAATCTACTCAGTTACTTATATTTGAATTTATAGACGGTACAATGCAACGCTCATGGTC  
 TGCAAGTGATAGATTTTCTCAAATAAAGATACCAACATATACTACGGAGGAAATGAAAAAGA  
 TGATTTCTAAAAGGGAAGCTCTCTTTAAATCCAGACTACGGGAATTTATCCTGGAAAAGGAA  
 AAGGCTAACCTTGACCCATTTCTGAGTTAACAAATCTAGCGCAGAAATATATTCCAAGGGA  
 GAGAGATTATGAGGATCCTATTGAGGCAATGATGAAGGCGAAGCAAGAAAGTAATGAGATGA  
 GCATTCCCAATTATTCCAATAATTCAGTGATAACAACAATTCCTCAAATGATTGAGAAATTA  
 AAAAGTACTGAATTCTACGCTTCTCAGATAAAGCATTGTTTTACAATACCATCAAGAACAGC  
 GAAGTATAAAGGTCCTGTGTTTTGAGCTTGCACCGGAAGTATATCAGGGTATGGAACACGAAA  
 ATTTCTACAGCCATCAAGCAGATGCGATAAACAGTCTTCATCAAGGCGAAAACGTCATTATT  
 ACAACATCGACCTCTTCAGGTAAATCCCTTATTTACCAACTAGCAGCTATCGATCTTCTTTT  
 AAAGGATCCTGAATCAACGTTTATGTATATATTTCCAACAAAGGCCCTGGCACAAGATCAAA  
 AAAGAGCATTCAAGGTAATACTTTCAAAGATCCCCGAGCTAAAGAATGCCGTGGTTGATACG  
 TATGACGGCGATACGGAGCCAGAGGAAAGAGCTTATATTCGTAAAAATGCTAGAGTTATTTT  
 TACCAATCCTGACATGATACATACCAGCATTTTACCTAATCATGCAAATTTGGAGACATTTTT  
 TGTACCATCTAAAGTTAGTGGTGGTTCGATGAATTGCATATATATAAGGGTTTTATTTGGATCG  
 CACGTGGCATTAGTGATGAGACGTTTACTAAGACTGTGCCACTGTTTTTACGAAAATAGTGG  
 TTTACAATTTATTTTCATGTTCTGCAACTTTAAAGTCTCCAGTACAACATATGAAGGACATGT  
 TTGGAATTAATGAGGTTACGCTAATACACGAGGATGGCTCACCTACAGGTGCTAAGCATCTA  
 GTGGTGTGGAATCCTCCAATTTTACCTCAACACGAACGTAAACGAGAAAAATTCATTAGAGA  
 GAGTGCAAAGATATTGGTACAATTGATATTGAACAACGTAAGAACCATAGCATTTTGCTACG  
 TTCGTCTGTTTTGTGAATTGTTGATGAAAGAAGTTCGCAATATTTTTTATTGAAACTGGGCGT  
 GAGGATCTGGTTACAGAAGTCATGTCTTACAGGGGTGGTTATTCTGCTTCGGACAGACGTAA  
 AATAGAACGTGAGATGTTTTACGGAAATTTAAAGGCTGTCATATCTACCAATGCTCTAGAAC  
 TTGGTATTGATATCGGTGGACTAGACGCAGTCTTGATGTGCGTTTTCCCACTATCAATGGCG  
 AATTTTCATCAACAAAGTGGTAGAGCTGGAAGAAGAAATAATGATTCTTTAACCTCGTGGT  
 TGCAAGTGACTCGCTGTTGATCAACATTATGTTGCTCATCCAGAATCCTTGCTGGAGTTA  
 ATAATTTGCAATCTTATCAAGATTTGGTTCTTGATTTCAATAACATTTTGATACTGGAAGGA  
 CACATACAATGCGCTGCTTTGCAACTGCCAATAAATTTTGAACGTGACAAGCAATACTTTAC  
 TGAATCTCATCTTCGCAAAATCTGTGTTGAACGTTACATCACAATCAAGATGGGTACCACG  
 CCAGTAATAGATTTTTTACCATGGCCGTCCAAGTGTGTATCTTTGAGAGGCGGAGAAGAAGAT  
 CAATTTGCCGTAGTGGATATAACAAATGGAAGAATATAATAATTGAGGAAATAGAAGCATC  
 CAGGACTAGTTTTACTTTATATGATGGCGGTATATTCAATCACCAGGCTATCCCTACCTTG  
 TGAAGGAGTTAATCCTGATGAAAGATATGCTAAAGTGCAAAGAGTAGATGTTGACTGGGTA  
 ACCAACCAAAGAGACTTTACAGATGTAGATCCACAGGAAATTTGAACTTATACGCTCTTTAAG  
 GAATAGTGATGTTCTGTTTACTTTGGTAAGATCAAGACTACAATTATTGTATTTGGCTTTTT  
 TTAAGTAGACAAGTACAAGAGGATCATCGATGCCATCGAAACCCATAACCTCCTGTAAATA  
 ATCAATTTCAAAGGATTATGGATAGATATGCCAAAATATGCCTTAGAAATTTGCCAAAAGAA  
 GCAATTAATGTAGCAGGAGCTATTACGGGGCGCAACATGCAATTATGGGTATGTTACCGC  
 GATTTATAGTGGCGGTGTGGATGAAATACAACTGAATGCAAAGCTCCGAAAAGGAATTT  
 GCAGAACGTCAAACATAACGAAAGCGACCAGCTAGATTAATATTCTATGATTCCAAGGGCGG  
 TAAGTACGGGTCTGGCTTGTGTGTTAAAGCGTTTGAGCATATTGATGATATTATAGAGTCTA  
 GTTTAAGAAGAATAGAAGAATGCCCATGCAGCGATGGATGTCCTGACTGTGTAGCGGCTTCT  
 TTTTGTAAGGAAAACAGCCTGGTCTGTGCAAACCTGGCGCCCAAGTCGTTTTGCATTGTAT  
 TCTAGGTCACCTCGGAAGATAGTTTTATAGATCTTATCAAAGATGGTCCAGAGCCAAATATGC  
 CAGAGATAAAAGTAGAGACTGTTATTCCTGTGTCAGAGCATGTCAACTTTTCAGATGATTTT  
 AAGATTATTGACGTTAGAAGAGCTACGAAAGACGATACTCATACAAATGAAATCATTAAGAA  
 AGAGATATGA

>YNR055C 0.81 Cold

ATGGACAAATATACCAACAGGGATCATCCGGACTATATTCCTGGCACATTTAACATCTATTC  
 TTCCCAAATTTGGAAAATGGTATTATATACGAATCAAAATTTGAAGAAAACCTCCTCAGGAG  
 TCGTCCATATCCCTCAACCATCATACTCGCCAAATGATCCACTGAACTGGTCTAGCTGGAGG  
 AAATGGCTCATTTGGTCTAATGGCCTTTATAACTGCGTTTACCGCCGCTACTAGTAACGA  
 CGCTGGTGTGCTCAAGACTCATTTGAATGAGATTTATGGGATATCCTACGATTCATGAACA  
 CAGGGGCTGGTGTCTTTTCTAGGTATTGGTTGGTCCACTTTATTCTTGGCTCCATTTGCT

AACTTGTATGGCAGGAAGATTACGTACATAGTTTGCACCACATTAGGTCTCTTTGGTGGCT  
 TTGGTTTGCTTTGGCCAAAAGAACGAGCGACACAATATGGTCTCAGTTGTTTGTAGGTATTA  
 GTGAGTCCTGTGCTGAAGCCCAGGTGCAACTGTCCCTGAGCGACATTTTTTTCCAGCACCAA  
 TTGGGCTCCGTATTGACCGTGTATATCATGTGCTACTAGTATCGGTACGTTCTTGGGCCATT  
 GATCGCTGGGTACATATCTGCATTTACCAACTTCCGTTGGGTGCGTTGGGTGCGAGTGATCA  
 TATCTGGTGGCTTTTAATAACTATTATATTTGGCTGCGAAGAAACGTACTTCGACAGAGGC  
 CAGTATATGACCCCTTTGACCAGCTGTCAATCGGGATACGAAGACGGTACCCTTTACAAAA  
 CTCTGACAATACGGCCGTGTGCGCAGGAAACGTCATCTTGACGCTAAATTTCAACTCCTG  
 GAGCCATGGGTGAGAAAGGTGTAGACCTTTCAGAGACGGCTGAATTCGAAGTTAAACAATGAA  
 GAGGAAGTTACCATACCTGAGACTCGCGAATTGATTGATGGTTCAAAAAGAGCATTTGAAACC  
 ATACCCAAAAAGAGTAGCAATATTAACCAAAGCTACTAATTTGAAAGGCTACGGTTTTAAAC  
 AGTATTTCAAATATCTAAAGATCAACCTTAGAATGTTCTTATTTCCCGCCAGTGTGGTTGTCT  
 GGTATGTTTTGGGGTATTCAAGACGTTTTTCTGACGTTTTATTTGACCACTCAAGAAAAGCGC  
 CTACTACGAACCTCCATGGAACATAGTGATTTTGGTGTGCGCAATTATGAATGTTCCACAC  
 TTATTTGGAGCAGTCATCGGTTGTATCTGTGCTGGCATTGTTAGTGACTACTTTGTTCTTTGG  
 ATGGCTCGTCACAATAGAGGAATTTTAGAGGCAGAATTTAGACTATACTTCTCTATCGCAAC  
 TGCAATTTATGGGCCAGCGGGTTGCTGATGTTTGGTATCGGTACCGCTAGACAATGGCCTT  
 GGCAAGCTATATACGTCGGGTTGGGTTTTGTTGGGTTTGCATGGGGTTGTTCTGGTGATATT  
 GCGATGGCGTATTTAATGGATTGTTACCCCGATATGGTTTTGGAAGGTATGGTTTTGTACTGC  
 TATTATTAACAACACGATATCTTGCAATTTTACCTTTACCTGTTCTGATTGGCTAGCTGCAT  
 CTGGTACTGAAAATACTTACATTGCTTTAGCTGTCATCAACTTTGGGATTACTGCATTTGCT  
 TTACCAATGTACTACTATGGTAAGAGGATAAGACTTTGGACTAAGAGATGGTATTTGCAATC  
 TGTCATTTGAGAGACGGTGTGTAA

>YJR032W 0.68 Cold

ATGATTCGAAGATCCCCTTGTATATTTAGACATCTCCATTGATAAAAAACCAATTGGTCTGAT  
 TGTCTGCAAACTTTTTCGTGAGAAGGCTCCTAAAACAACAGAGAATTTTTTATAAGTTATGCG  
 CTGGTGATGTTAAGAGTCCTTTGAAGGATCAACAGTACCTGAGCTATAAGGGAAATGGTTTTT  
 CATAGAGTCGTTAAGAATTTTTATGATCCAGGCAGGTGACATTTGTCTTTGGGACACAAAAGGA  
 TTCTCTTCATCGTCTGTTGGAAAAGGTGGATGTTCAATTTACGCTGATAAAGAGGAAGTGA  
 AAACCGATGATGAATCTTTCTGTTACGGGAATTTTGAAGACGAAAACCTGGGAGAGTTTGTA  
 GAACCTTTTACCTTAGGTATGGCCAATTTAGGTTCTCCAATACGAACAATCCCAGTTTTTT  
 CATAACTACATACGCCGCACCTCATTTGAACGGCAAGCATTCTATTTTTGGGCAGGTGTTTC  
 ATGAAAATCAGTGGTTCGCACTATAGAAAACGTCAGGGTAGATTCTGATGGAGTCCCTGAA  
 TCAGACGTTAGAATCAGCGACTGTGGAGTGTGGAAAAAACTATGGGTGTCCCCTTTACAA  
 CGCTTCTAATGACCAAATTTGGCGGTGACGTATACGAAGAATATCCAGACGATGATACACATT  
 TCGGTGACGATGATTTTTGGTAAGGCTCTTGAGGCTGCTAATATAATCAAAGAATCTGGGACG  
 CTCTTATTTAAGAAAAAGGATTACTCTAATGCCTTTTTTCAAATACAGAAAATCTTTAAATTA  
 TATCAATGAATACATGCCTGAACCCGACGTAGACAAAAGAAAAGAAACATCCAATTTATTAACC  
 TAAAGATGAAAATTTACCTAAATTTATCTTTGGTGCTCTTTAATCTGGAAAGATACGATGAT  
 GCTATCATGTATGCTACGTATTTATTGGAGATGGATAACGTTCCCTAACAGAGATCAAGCAAA  
 GGCTTATTATAGAAGAGGTAACAGTTACTTAAAAAAAAGAGACTAGACGAAGCTTTACAAG  
 ATTATATTTTTTGTAAAGAGAAAAATCCCGATGACGAAGTTATAGAACAAGAATAGAATAT  
 GTCAATAGGCTCATAGAAGAGAATAAGGAAAAGACAAGAAAAGAATATATCAAAGTTTTTCTC  
 CTAA

>YDR531W 0.77 Cold

ATGCCGGAATTACTCAAGAGATATCTTACAATTGCGATTATGGCGACAATACTTTCAACCT  
 TGCTATTGATATAGGAGGCACTCTGGCTAAAGTAGTCTTCTCGCCTATACACAGTAACAGGC  
 TGATGTTCTACACCATTTGAAACAGAGAAAAATGACAAGTTCATGGAACCTCTGCATTTCTATT  
 ATCAAAGAACATAACAATGGATGCTATAGAATGACTCATATAATTGCCACTGGTGGTGGCGC  
 CTTCAAGTTTTATGATTTGTTGTATGAAAATTTTCTCAAATAAAAAGGTATATCGAGGTTTCG  
 AAGAAATGGAAGGCTTAATTCACGGTTTAGACTTTTTTCATTCATGAGATTTCCCGATGAAGTT  
 TTCACTTACAACGATCAAGATGGCGAAAGGATAATACCCACCAGTTCCGGCACCATGGACTC  
 AAAGGCTATCTACCATACTTCTAGTCAATATAGGGTGGGTGTCTCAATATTTAAAAGTCA  
 CCGAACCAACAATTTTAGTAGAGTAGGCGGTTCTTCACTGGGAGGAGGAACTCTTTGGGGC  
 CTATTTACTAATTTACTGGCGCTCAAACCTTATGATCAGATGCTCGATTGGGCACAAGAGGG

TGACAATTCTAGCGTTGATATGCTAGTTGGAGATATTTATGGAACAGACTATAATAAAAATTG  
 GTCTAAAGTCGTCAGCTATTGCAAGTTCATTTGGTAAAGTTTTCCAAAATAGAATGACATCT  
 AACAAATCTTTGGAAAACAACGAAAATAAATTTATATTCCTCACATGAGTCTATTGAGAAAA  
 CAATGGACAAATGTTTAAAGAATCCTGATATTTGTAAAAGTCTTCTATTTCGCCATCTCCAACA  
 ATATTGGGCAAATAGCTTATTTGCAAGCTAAAATCAATAATATACAGAATATATACTTTGGC  
 GGATCTTATACCAGAGGACATTTGACTACCATGAACACTTTGAGCTACGCTATTAATTTTTG  
 GTCACAAGGATCAAAGCAAGCGTTTTTTTTCTCAAACATGAAGGCTATTTGGGTGCAATGGGTG  
 CTTTCCTAAGCGCGTCTCGTCATTCATCTACTAAGAAAACAAGTACGTAG

>YJR007W 0.81 Cold

ATGTCCACTTCTCATTGCAGATTTTATGAAAACAAATACCCAGAAATTGACGATATCGTCAT  
 GGTAAACGTCCAGCAGATTGCTGAAATGGGTGCTTATGTTAAATTGTTAGAATATGACAACA  
 TTGAAGGTATGATTCTACTAAGTGAATTGTCCCGTAGACGTATTAGGTCAATCCAAAAATTA  
 ATTCGTGTTGGTAAAAATGATGTCGCCGTTGTTCTTCGTGTCGACAAAAGAAAAGGTTATAT  
 TGATTTGTCCAAACGTCGTGTTTCTTCTGAAGATATCATTAAATGTGAAGAAAATACCAA  
 AATCTAAGACTGTTCAATTCATTTTAAAGATACTGTGCCGAAAAATTCCAAATCCCTTTGGAA  
 GAACTATATAAGACCATTGCTTGGCCATTAAGTCGAAAAATTGGTACGCTTACGAAGCTTT  
 CAACTATCCATCATTGACGAACTGTTTGGGAAGGTATTGAACCGCCATCAAAGATGTTT  
 TAGATGAATTAAGAAGCTATATCTCCAAGAGATTAACACCACAAGCTGTAAGATTAGAGCC  
 GATGTTGAAGTGTCTTGTTTTAGTTACGAAGGTATCGATGCCATTAAGACGCATTAANAATC  
 AGCTGAAGACATGTCCACAGAACAATGCAAGTTAAAGTTAAATTAGTCGCCGCCCATTTAT  
 ATGTTTTGACCACCAAGCCTTGGATAAGCAAAAAGGTATTGAACAACTGGAAAGCGCTATT  
 GAAAAAATTACAGAGGTTATTACAAAATACGGCGGTGTTTGCAACATTACCATGCCACCAA  
 GGCTGTCACTGCTACTGAAGACGCTGAGTTACAAGCTCTATTAGAAAGCAAAGAATTAGATA  
 ATAGATCTGACTCTGAAGACGATGAGGATGAGTCAGACGACGAGTAA

>YCR026C 0.74 Cold

ATGGAACCTCAGAATGATTTAGAGTCGCTCGATAACGAGCTGAATGATTTTAGTGAAGATCC  
 ATTTTCGTGATGATTTTCATAACGGATGAAGATGCTGTAAGATCGGGGTGGCGATCTGCGTGGA  
 CCAGGATGAAATATTGGTTTTATAAGAATAGACTGAAGTGGACAAACAATCCCATAGTGATT  
 GCGACGCGAAAGATAGTAGGGATGGTTCTAACTTTAGAAGGGGTATACCGCTATATGAATT  
 AGACCGAATGGTCAACCCATTGATACTGAACTTGTTGATGAGAATGAACTTTCTTTTGGAA  
 CGGGATTTTCATTCCAAAGTGCCTTTTTAAATAATATTTTCGCACATTGTTTGGCTCGCTGGT  
 TTTGCCATTTTTTTAATTCTGATGATTAACATAGCAAAACCCATCACTCCACGAGAGTGCT  
 ATCGCACTTTGGCAGTCTGAATTTGACCCTTACGTGAAGTATTTTAAACGGTACGCATGAAT  
 TTTTCCCTTAACGATAGTAATTTCACTAGACGGTTTCCATCCTTCACTCATATCTAAGAGG  
 AACACACCGTTTTTTACATGACTTATATGAATTGAAATATGATGGAGGTATGAATATCACGTC  
 CACACCTTTTATGGTACCCAGCTTCCCTACGGAGACCTTTCCCAACCATTGGACGTTGGTTA  
 CTGGACAATACCAATACACCACGGTATAGTCTCTAACGTATTTTGGGATCCTGATCTTAAT  
 GAGGAATTCATCCAGGTGTATTGGACCCTCGAATATGGAACAATAATGATACAGAACCAAT  
 ATGGCAAACGTGTCAGTCTGCATTTGACGGTGATATACCATTCAAAGCTGCTACCCATATGT  
 GGCCAGGTAGCGATGTGAATTATACCAAGTATAATGAAGAGAACTACAACCTGAACATAAA  
 AATCCTATTGCTAGAGAGAGAACTCCATTTACTTCGACGAATTCATGCTAAAGAACCCT  
 TTCGAAAAATTATCCAAGATTATTGAATATGTGGATATGAGTACACTGAACGAAAGACCAC  
 AGCTAATTTCTCGTTATGTACCGAACGTAGATGCCTTTGGACATAAGCATGGATATCCGTCA  
 GAGTCGGAATACTATTATGAAGACTTCACTGAAACACTGGGGGAAGTAGATACATTTCTGAA  
 GCAACTAGTGGAAATCGCTGCAAGAAAGAAATTTAACACGCTTTACTAATTTGGTCAATGTTA  
 GCGATCATGGTATGAGCGATATCGTAGTTCCCTCAAATGTTATTATATGGGAAGACTTACTG  
 GACGAAAAATTGAGGAAGGATTATGTATCGCACGCATATCTAGAGGGTCCGATGATGGCTAT  
 ATCGTTGAAAGATTCCGGAAACATCAATGAGGTTTACCACAATTTAAAGACTTCTATAGATG  
 AAGACAAGTATACGGTTTACGTTAATGGAAATTTCCCCAAAGAATGGAACTTTAAATGATGGA  
 AAAAAATCATCACATGGCGTCAATCTGGATTGTGCCCGAGCCTGGGTATGCAGTGATGAAGAA  
 AGAACAAATTGAAGAAGGTGGCAAAAGGTGATCATAAGGACAAAAACGAAGACAATGTGTTCA  
 CGATTGGATCACATGGATACGACAATAACGCGATCGATATGAGATCTGTATTTATTGGTATG  
 GGGCCATATTTTCCACAGGGATACATTGAGCCGTTCCAAAATACCGAAATTTACAACCTTTT  
 GTGTGATATTTGCGGTGTGGCAGAAAAGGACAGAAATTTCCAATGATGGGACTGGGATGCTTA  
 TGAACCAACTCCGCGAACCCAGAGCAGCGAAGAAGTAGAGATTGAAGATGACTTTGATTA

TTGGTCAGTAAGTTTGGTGAATTCAGCACTTATAATATAATTTGGGGCGGGTACCCCGAAGA  
 GACAGAACAAGACAATGTTGACAATGATAATGATGACAACGACGATGGAAACACTGATGAAA  
 TAGCCGCTATGCCATCTTCGTCATTAACGATAAACTAGAAATGACAACCTCAATACCATCA  
 GCAACTGAGACTCTACTGGGCGAAACATCACCATCATCAAGAAGCAGCAGCAGCAGCAT  
 ACAAGCTAGCGCTACTGCTAGCACAGTGGGGGATTGGCTTCAAGACATAATCAACGACGCAA  
 AAGATCTCATTGACGACATAATGACAGCATCGACGATTTAGTCGATTCTGATACCTAA

>YNR026C 0.82 Cold

ATGAAGTTCGTGACAGCTAGTTATAACGTCGGGTATCCTGCGTACGGTGCAAAATTTTTGAA  
 TAACGACACATTACTTGTGGCAGGCGGTGGAGGAGAAGGAAACAATGGCATACCAAACAAGC  
 TGACGGTCTTGCGCGTGGATCCTACCAAAGATACTGAGAAGGAACAGTTTCATATATTGAGC  
 GAGTTTGCATTGGAAGACAACGACGACTCTCCTACTGCAATTGACGCTTCCAAGGGTATCAT  
 TTTGGTTGGCTGCAATGAAAATAGCACTAAGATTACCCAAGGTAAAGGTAATAAGCACTTGA  
 GAAAATTTAAATACGATAAAGTGAATGATCAATTGGAGTTCCTCACTAGTGTAGACTTTGAC  
 GCATCTACAAATGCGGATGACTACACGAAGCTGGTTTTATATTTACGAGAAGGTACCGTTGC  
 AGCTATCGCATCATCTAAAGTACCTGCTATAATGAGAATCATTGACCCGAGCGACTTGACAG  
 AGAAGTTTGAGATCGAGACTAGGGGTGAAGTAAAGGATTTACACTTTTCCACTGATGGTAAG  
 GTTGTGCTTATATCACCAGTCTAGCTTGGAAAGTGATTTCAACAGTGACTGGAAGTTGCAT  
 TGCTAGGAAAACAGATTTTGATAAGAATTGGAGTTTATCTAAAATAAACTTCATAGCCGATG  
 ACACAGTATTGATAGCAGCCTCTTTAAAAAAGGGAAAGGTATTGTGCTGACCAAAAATAAGC  
 ATCAAATCAGGAAACACTTCCGTATTAAGATCCAAACAAGTGACAAACAGATTCAAAGGGAT  
 TACTTCTATGGATGTCGACATGAAGGGTGAATTTGGCGGTACTGGCAAGTAATGACAATTCCA  
 TAGCTCTTGTGAAACTAAAAGACCTGTCAATGTCTAAAATATTTCAAACAAGCTCATAGTTTT  
 GCCATTACAGAGGTCATATCTCTCCGGACTCTACATATGTGGCGAGTGTTCGGCAGCCAA  
 CACTATCCACATAATAAAATTACCGCTTAACTACGCCAACTACACCTCAATGAAACAAAAAA  
 TCTCTAAATTTTTACCAACTTCATCCTTATTGTGCTGCTTTCTTACATTTTACAGTTCTCC  
 TATAAGCACAATTTGCATTCCATGCTTTTCAATTACGCGAAGGACAATTTTCTAACGAAAAG  
 AGACACCATCTCTTCGCCCTACGTAGTTGATGAAGACTTACATCAAACAACCTTTGTTTGGCA  
 ACCACGGTACAAAACATCTGTACCTAGCGTAGATTCCATAAAAGTGCATGGCGTGCATGAG  
 ACGAGTTCTGTGAATGGAAGTGAAGTCTTATGTACTGAAAGTAACATTATTAATACTGGAGG  
 GGCAGAGTTTGAGATCACCAACGCAACTTTTCGAGAAATAGATGATGCTTGA

>YEL029C 0.77 Cold

ATGCCTCGTCTCTTGGCCACGCAGTCTCATGTTGTACATGGATATGTGGGAAATAAGGCTGC  
 AACGTTTCCCTTACAGTGTCTAGGCTGGGATGTGGATTGTTGTAACAGTGTTCAGTTTTCCA  
 ACCATACCGGATATGGTTTTAGATAAAGTGTTTGGGACTATAACGAGGGAAACAGATTTGAAG  
 GAACTCTTATCAGTCTTTTTGATAATTTTTCCAAGACTACCAAGCCTTACTTTACAGGCTA  
 CTTGCCAATAAGAATTCCGTTTCGATGTATGGGAACATACTACGCTAAATTTAAAGAGGCGA  
 ATCCAGAAATGATATGGCTTATGGATCCTGTTATGGGTGACGAAGGACAATTATATGTTAGT  
 GAGGATGTCATACCAGAATATAGAAAGCTGGCTTTGTCTCCAAAACAGCTAGTCGATATAAT  
 AACTCCGAATCAATTTGAGCTGGAGATACTTTATGGGGGGAAATCAAGACTAAAGAACATT  
 TGAAGAAGGCCTTAAAGAAATTACACCAAACATCCCAGTGATCATTGTCACATCCTGTGAC  
 TGTAAGATGTTTGTGATGACAAAGATTTTATTTATTGCGTAGCTTCAATGGAGGGTAAAACCC  
 CATGTTTACAGAGTGCCGTTTATTGATTTCGATTTTCACTGGGGTTGGTGATTTGTTTTCTG  
 CTTTGTATTGGATCGAGTGTATAAGATCTTATCGAACCTACAACAACATTAATAATTTGAA  
 GACCAAGTCAATAATGTTCTTAATGTTATTTCAGAAGGTTTGGAAATGAAAGAAATGGAATTGCGTC  
 TTCAGGAAAAATGAAAGCAAAAATGGGTTCCGCCTTGGAAATGAAAGAAATGGAATTGCGTC  
 TTATTGAATCAAGAGATATATATGAAACAATCAACATTCATCAAACAGATTATATTTACGCA  
 AGGTTGTGA

>YNL238W 0.71 Cold

ATGAAAGTGAGGAAATATATTACTTTTATGCTTTTGGTGGGCCTTTTCAACATCCGCTCTTGT  
 ATCATCACAACAAATTCATTGAAGGACCATACGTCACGACAGTATTTTGTGTAGAAAGCA  
 ATGAAACATTATCCCGCTTGGAGGAAATGCATCCAAATTTGGAAATATGAACATGATGTTTCA  
 GGGCTACCAAACCATTTATGTTTTTTCAAAGAGTTGCTAAAATTTGGGCAAAAGATCATCATT  
 AGAAGAGTTACAGGGGGATAACAACGACCACATATTATCTGTCCATGATTTATTCCCAGGTA  
 ACGACCTATTTAAGAGACTACCGGTGCTGCTCCACCAATGGACTCAAGCTTGTACCAGGTA

AAAGAAGCTGAGGATAAACTCAGCATAAAATGATCCGCTTTTTGAGAGGCAGTGGCACTTGGT  
 CAATCCAAGTTTTTCTGGCAGTGATATAAAATGTTCTTGATCTGTGGTACAATAATATTACAG  
 GCGCAGGGGTCTGGCTGCCATTGTTGATGATGGCCTTGACTACGAAAATGAAGACTTGAAG  
 GATAATTTTTGCGCTGAAGGTTCTTGGGATTTCAACGACAATACCAATTTACCTAAACCAAG  
 ATTATCTGATGACTACCATGGTACGAGATGTGCAGGTGAAATAGCTGCCAAAAAGGTAACA  
 ATTTTTGCGGTGTCGGGGTAGGTTACAACGCTAAAATCTCAGGCATAAGAATCTTATCCGGT  
 GATATCACTACGGAAGATGAAGCTGCGTCTTGATTTATGGTCTAGACGTAAACGATATATA  
 TTCATGCTCATGGGGTCCCGCTGATGACGGAAGACATTTACAAGGCCCTAGTGACCTGGTGA  
 AAAAGGCTTTAGTAAAAGGTGTTACTGAGGGAAGAGATTCCAAAGGAGCGATTTACGTTTTT  
 GCCAGTGGAAATGGTGGAACTCGTGGTGATAATTGCAATTACGACGGCTATACTAATCCAT  
 ATATTCTATTACTATTGGGGCTATTGATCACAAGATCTACATCCTCCTTATTCCGAAGGTT  
 GTTCCGCCGTCATGGCAGTACGTATTCTTCAGGTTTCAGGCGAATATATTCAATTCGAGTGAT  
 ATCAACGGCAGATGCAGTAATAGCCACGGTGGAACTGCTGCGGCTGCTCCATTAGCTGCCGG  
 TGTTTACACTTTGTTACTAGAAGCCAACCCAAACCTAACTTGGAGAGACGTACAGTATTTAT  
 CAATCTTGCTGCGGTAGGGTTAGAAAAGAACGCTGACGGAGATTGGAGAGATAGCGCCATG  
 GGAAGAAATACTCTCATCGCTATGGCTTTGGTAAAATCGATGCCATAAGTTAATTGAAAT  
 GTCCAAGACCTGGGAGAATGTTAACGCACAAACCTGGTTTTACCTGCCAACATTGTATGTTTT  
 CCCAGTCCACAACTCCACGGAAGAGACATTAGAATCCGTCATAACCATATCAGAAAAAGT  
 CTTCAAGATGCTAACTTCAAGAGAATTGAGCACGTACGGTAACTGTAGATATTGATACAGA  
 AATTAGGGGAACTACGACTGTCGATTTAATATCACCAGCGGGGATAATTTCAAACCTTGGCG  
 TTGTAAGACCAAGAGATGTTTCATCAGAGGGATTCAAAGACTGGACATTCATGTCTGTAGCA  
 CATTGGGGTGAGAACGGCGTAGGTGATTGGAAAATCAAGGTTAAGACAACAGAAAATGGACA  
 CAGGATTGACTTCCACAGTTGGAGGCTGAAGCTCTTTGGGGAATCCATTGATTCATCTAAAA  
 CAGAACTTTTCGCTTTTGGAAACGATAAAAGAGGAGGTTGAACCAGCTGCTACAGAAAGTACC  
 GTATCACAATATTCTGCCAGTTCAACTTCTATTTCCATCAGCGCTACTTCTACATCTTCTAT  
 CTCAATTGGTGTGGAAACGTCGGCCATTCCCCAAACGACTACTGCGAGTACCGATCCTGATT  
 CTGATCCAAACACTCCTAAAAAATTTTCTCCTTAGGCAAGCCATGCATTTATTTTTTAACA  
 ATATTTTTTGATTGGCGCCACATTTTTGGTGTATACTTCATGTTTTTTATGAAATCAAGGAG  
 AAGGATCAGAAGGTCAAGAGCGGAAACGTATGAATTCGATATCATTGATACAGACTCTGAGT  
 ACGATTCTACTTTGGACAATGGAACCTCCGGAATTACTGAGCCCAGAGGTTGAGGACTTC  
 GATTTTGATTTGTCCGATGAAGACCATCTTGCAAGTTTGTCTTCATCAGAAAACGGTGATGC  
 TGAACATACAATTGATAGTGTACTAACAAACGAAAATCCATTTAGTGACCCTATAAAGCAA  
 AGTTCCAAATGACGCCAACGCAGAATCTGCTTCCAATAAATTACAAGAATTACAGCCTGAT  
 GTTCTCCATCTTCCGGACGATCGTGA

>YER051W 0.81 Cold

ATGCAAGATCCCAATATTTGCCAGCATTGCCAGTTGAAGGATAATCCAGGCGCATTAATTTG  
 GGTGAAGTGTGATAGTTGCCCGCAGTGGGTCCACGTGAAATGCGTGCCTTTGAACGCATTC  
 ACTATTCAAATCTTACAAGTCTGAAGTCTGTCTTATCCAAATTCTGCGAAGCAAATCAAG  
 AGCTACCGTTGTCTTAATCATAAGGAAGGAGAATATCTTACCGCATAACGCTCTCATCACACA  
 AAAAGGAAAGCGCAAAGGAATAAAGAAAACCTGAAGATAGTCATATAAATAAGCGGTATA  
 ATTTCAGAAAGAAGAAATTACTTGACTATATCGCTTTGAATGAGGGTGAATCGAAAAGGGAT  
 AAAATGAATCACCTCATAAGGAGAGTTTCATGAAATCTTTGAAAAATGGAAAAATGGCTC  
 AAATATTATAAACCGCCGCTGACTTTGCTGAAAAGTTTGATAATATAGATGTGCCGTACAAGA  
 TCATCGATCCACTGAATAGCGGAGTATATGTACCGAATGTGGGCACAGACAATGGATGCCTC  
 ACAGTTAATTATATCACCGAAATGATAGGCGAGGATTATCATGTTGATGTAATGGACGTTCA  
 ATCACAATGAATGAAAATTGGAACCTGGGATCTTGGAAATGAATATTTTACAATACTGAAC  
 CAGACAGGAGGGATCGAATAAGGAATGTTATATCATTAGAAGTCTCTAATATTGAGGGATTA  
 GAACTAGAGAGGCCACTGCAGTTAGGCAGAATGATCTTGTGATAAAATTTGGAGTTTCAA  
 TGGACATTTAGAAAAAGTCAATGGGGAGAAGGCGGAGGAGAATGACCCCAAGCCAAAAGTGA  
 CCAAATATATTTGATGTCTGTAAAGGATGCTTATACGGATTTTCATTTGGATTTTGCCGGT  
 ACCTCTGTTTATTATAACGTTATCTCAGGACAGAAGAAGTTTTTATTATTTCCACCTACCCA  
 ATCAAACATAGATAAGTATATTGAGTGGTCTTTAAAAGAAGACCAAAATAGTGTTTTCTCG  
 GTGATATTCTTGAGGATGGTATTGCGATGGAATTAGATGCTGGTGATTTGTTTATGATTCCA  
 GCTGGATATATTCATGCAGTTTATACACCAGTAGACTCTTTGGTATTTGGAGGCAACTTTTT  
 AACCATCCGTGATTTGGAGACACACCTTAAAATTTGTGGAAATTTGAAAAGTTAACAAAGGTTT  
 CTAGAAGATTTACCTTCCCGAAGTTTGATCAAGTGATGGGTAAATTATGCGAGTATCTTGGC



CTTGATAAAAAATAAAATCACTAGTGATGTCAGTGATGGGGATTTGCTTCCAGGACCACTAA  
 TTGCGCAATTCAATCACTTCATGCATACGTTATAAAACCTGAAGTTAAGTACAAGCCGTTAA  
 ATTTCACTTCAAAGAAGCATTTAGCGAAAGCTTTAGCCGATCTTATTTTCGTAA

>YOR110W 0.7 Cold

ATGGTGGTGAACACGATATATATCGCAAGGCATGGATACAGATCCAACCTGGCTTCCGGAGGG  
 TCCATATCCTGACCCACTTACAGGAATTGATAGCGATGTTCCCTTTAGCAGAACACGGAGTCC  
 AGCAAGCCAAAGAGTTGGCCATTACCTTTTGTCTTGGATAATCAACCAGAGGCCGCTTC  
 GCTTCTCCATTTTATAGATGTCCTTGAGACTGTACAACCGATAGCTAAGCTGTTAGAAATACC  
 TGTTTATCTAGAAAGGGGTATCGGGGAATGGTATAGACCTGATAGAAAACCTGTTATTCAG  
 TACCTGCTGGATATGAGATACTAAGCAAATTTTTTCCAGGTGTCATTAGCCAAGAATGGGAC  
 TCTACATTAACACCAAATGAAAAGGGTGAGACAGAACAGGAGATGTATATGAGATTCAAAA  
 ATTTTGGCCCTTATTTATTGAACGTGTAGAAAAGGAATATCCAAATGTTGAGTGCATACTGT  
 TGGTCACACACGCTGCATCTAAGATTGCCCTTGGAAATGAGCTTGCTGGGATACGATAATCCT  
 CGGATGTCTTTGAATGAAAATGGTGATAAAAATAAGAAGTGGTAGTTGCTCATTAGACAAATA  
 CGAAATTTCTTAAAAAAGCTACGATACTATAGATGAAACTGATGATCAAACATCCTTTACCT  
 ATATACCATTTAGTGACAGAAAATGGGTTTTAACGATGAATGGGAATACCGAGTTTTTGGAGT  
 AGTGGTGAAGAAATGAATTGGAATTTTGGATTGTGTGGCAGAAGCTGGTTCAGATGCTGATAT  
 CAAAAAGAGACAAATGACAAAAAAACCAGCTCACCAATACCAGAAGCAGATGATCAAACGG  
 AAGTAGAAACCGTTTATATCAGTGTTGATATTTCCAGCGCAATTACAAAGAGAGGACCGAG  
 ATAGCAAAGAGCGCAATTTTACAATATTTCCGGTTTTAGAAACAGATGCTCCGTTGTTTTAGAAT  
 CGGAAATAGATTGTATGAGGGAAGCTGGGAGAGACTTGTGGCACGGAGCTTGCTTTCCCAA  
 ATGCTGCACATGTACATAAAAAAGACAGCCGGTCTACTATCACCGACTGAAGAGAATGAAACA  
 ACAAATGCTGGTCAAAGTAAAGGCTCATCGACTGCCAACGACCCAAACATACAAATACAAGA  
 AGAAGACGTTGGACTACCGGATTCAACTAACACAAGTAGAGATCACACGGGAGATAAAGAAG  
 AGGTTCAATCAGAAAAGATTTATAGAATAAAAAGAGAGGATAGTGCTAAGCAATGTCCGCCCT  
 ATGTAA

>YIL067C 0.76 Cold

ATGGGTGTGCATTTTGATGATAATGCTAACACAACGTGGGAAGCCACAGACCCTGGCGTTTT  
 AAGTGATTGCGATGGACAGCACCGTGTGACTGAGTCTATACAACCTGCAGAACTTTTCCAATA  
 CAGACATGGAAAGTATGCTTGATGAAGAAGGGAGAGAAAACAGTAAGTCAAATGGTTACTA  
 TTAAAAAGGAAACATCCTATACAAAAGTTTTATTGAAAGAGTTTGGAAATGGCCCTGTTGAGCC  
 AAGTGACGAACCGCTTAGCTTTCCATAACGTTGGGGATGGCTGAAGAAGATAGATGATTTTC  
 CGCAGACTACATTCAAAACATAAATACCAAGTAAGTTGATACGACTGTTGCTACTGATTGTG  
 TACTGCTGCTTTTGGATGCGCATTTTTTATTCTCTCATATACCCCTATCTTATCAAGCCGCC  
 ATACTTCCATCCAAATGATGGCTCAGAAAAGATTCCCTATATTTGTCTTTAAGTTGCAATTCCT  
 ACTTGAACCTGGGAGGGTACCAATAACGAATGTGGTTTTAAATGCTAAAAACTGCGGTCCACTT  
 GATAATAAAGAATACATGATCAGATGTCCAGCACTGTGTGATAGAGGTGGATGGACATACTC  
 CGCCATTGCCGTAGGGAATAGGAGAGTCAAATATACAGGGTATGAAATTTGGCGGAGGTGCC  
 TGTTTAGCGAAGAAGACCCGATGGTCTGTCTTACCCTTATAGAAGTGACTCGTTTCCATGC  
 GCCTCTGCAGTACATGCAGGTGTTATCTCACCATTTTACGGTGGCTGTACCAAAGTTTCTAT  
 GCAAGGGGCCAAAATTTCTTTCCATCAAAAAAGGAATGTATAACACTGGGTTTTTCAGTAG  
 CATTCAATTCATTTTTTCCCGTTTCATATTCATTTCAGAGATATACAAGCGGTATCCTGTG  
 GGCTGTTATGATCCTCGAGCAGCTGTGGTGCATTGAATATGCTTTTTGGACTGCCAATATT  
 TTATTTGTATGACAGTATTTACGGGTACTGGATAAACACGATAGTGGGCTATTGGACTCTTG  
 TATTATCTCTAGACCCTCCATTAACGGATGCACATGACCCAGCTAGCGTGTATGAGCTT  
 TTCAGTGTGGGATTTCAAAGACTTTTACCTTTATGCTTTGTTTTATACGTCGTTTTGGAAGAG  
 TGCGGTGAAAAGAACACTAGAAAATGGATCGCCCATAGCAAAAGTAATACTTTGGTACCCCA  
 CATTTTGGTTGGGAATCTCAAATAATGTCACATTTGACCGATTACCTGTTGATAGACTTACG  
 ACGACGGATTTGAAAGAGCAGGCTGGAGCACTGACTGCTGTGGGATCTATTGCAGCCACTAT  
 TCTTACATGCGCAGTTATACAGGCTTATTCACCTCTGGAAATCAGGAAGATTCAAAAAGTATT  
 TTTAAATATACATTTGTTTCATTGGCGGATTAATAGCTTTGGGATCTTTGCCGGGACTGAAC  
 TTGAGGATACATCACTACATCTTAGGTTCTATACTGGTTCAGGCTGTGCCACGAGAGGATC  
 ATCTGCATATCTGTTCCAAGGAATTTTAGTCGGGTTAATTCCTGTCTGGTGTAGCAAGATGGG  
 ATTTTGCAAGCATAGTTGAGACAGATACGGCTTGTTAAGAGGAGAAGCAGGTGCTTCTTTG  
 AAGCCACCTATACTGGATTTTAAACGACGATCAAACCATTCCTGTCTGCTGGCATCTAAATGC

AACTGATCCAGTAATTGATCAAATAGGAAACATCGACGGTTTTTCATTACTTTTGAACGATG  
 TGGAAAGTGTACGTAGGCAAGAATGAGACTGTGAGTATCGATGTTCTTCGGATGGAGAATCCA  
 GCACTTGCTCAAATGATGGACGATGCTCTTGATGCCTCTAACGGGACAATAGACTTGTATTT  
 AAGAGTGGCTCGTGCCTCTGTACGGTCTCCAACGAATAGAGGTGACTATACGAATGCAGGAG  
 TTTTACAGTGGCCGAACGGAATGTGGCAAAAGCCTGAACCAGGCGTATCATAA

>YBR194W 0.76 Cold

ATGGATCAAAAAGAAGGACCCCAAGTAATAACTTAACAGAAAAGAAGGGTTTCCAAGGTCCAACG  
 CCCAAATAAGAAAAAGGTACGAAATCAAGTTGAATCACTTTCTAGAAACCTAGAGAGAAATA  
 AAGAGGGACAGCTTCTGCAGACTGTATCAAAAAGGTCATTTAGAAGCTGATTTCTGGACACTCA  
 CTGGGTCTGTGAAAAAGAGAACGGTGAACCTCGGTATAAGAAAGTATATTTTACGATAAAGACTG  
 GAATCCAAGAGGCACTGCACCATCACATTACAGAAATATACCTTATAATCCTGCCACTTTCA  
 AAAGGCGAACTGAAGTTCAAGCCAGACTGGGAAACCTCGAGAATATCAAAAATACCAAAGTGA

>YBR180W 0.81 Cold

ATGGGAAGCGAACCGTTTCAGAAAAAGAATTTGGGTCTGCAAATTAATTCGCAAGAAAAGTGG  
 AACAAACCCGCTCAACATTTTCATTCGCTAGAAGATCTAGGAGATGATGTAATTAATGAAAAGCT  
 GGGATCAGGTGAACCAAAAGAGAGCCAATATAGATCATGATGTCTTTTCATGAGCACCCCTGAC  
 TCTTCCCCTCATTTGTTCAGCACAGAAAGCAAAAACAAAAGAAGAGGAAGTTGCTGTAAAAGTC  
 ATCGAACTCCCAGTCAAGAGACCCTTCTCCTGATACTCAAGCACATATTCATATACTTATT  
 TTTCCAAGGATCAAAGACTAATCATTTTTTGGAAATTATCATTTTTTATAGGATTTTTTGGGCCCA  
 ATGCTCTGGAACATATATATATACCGGCTTTACCATTGCTGCAAAGGGAATATGATGTAAGTGC  
 AACAAATAAAACGCTACAGTTTTCTGTATTTATGGCTGTTTTTTCCGTTGGTCCATTGTTTTT  
 GGGGCGCACTGGCGGATTTTTGGTGGAAAGGAAATTTTATATATGGTGTCTTATCACTAATG  
 TTAATTGTTAATAATACTTTTTGGCCGCTGTACCAGTCAATATGCTGCCCTTTTTTGTTTTAAAG  
 AATTTTCCAAGCTTTCGCTTCCAGCTCTGTGATTTCTCTGGGAGCTGGCACTGTAACAGACG  
 TTGTTCCCTCCAAAACACAGGGGAAAGGCCATAGCGTATTTTCATGATGGGTCCAAACATGGGT  
 CCTATTATAGCACCCATTGTTGCTGGGCTTATTTTTAATGAAAGGAAATTAAGTGGAGATGGCT  
 TTTTGGTTTTCACTTCTATCATGACAGGAATAGCATTGATCTTGGTTACTGCTTTTACTTCCAG  
 AAACGCTACGTTGTATAGTTGGTAATGGAGACCCTAAATGGGGTGACAAAAAAGATGAACGT  
 GAAAATAACGAATCTCCATTCTTCGAAGGTAATAAAATATCACATCGGCGTCTGTTCCCGA  
 CATTGGTATCCGTAACCCAGTCAATAATGATGCTTTTCTTCCAAGAAAATTTTCCAAGCCGC  
 CTAAGCAGGTTTGACACTATATTTGGAAAATGATTAATATGCTTCCAATAATAATCACGTCC  
 GTCAGTACTGCACTCCTGTTCTCCAGTTACTATGCGTTCCAGCGTCACGTTTTCGTATTACCT  
 TGAACATGACTACCGTTTTTACTATGTTAGAAAATGGTGTCTGCTTATGTCTGCCAGGTGTAG  
 CTATGTTACTAGGATCTCAATCTGGTGGGCACCTCTCAGATTATCTTCGTTCCAGCTGGATC  
 AAAAGTCATCCTAAAAAGAAAATTTCCGGCAGAGTTTCGTTTATTACTGAACCTAATTGGAAT  
 TTTACTAACAATATGTGGCACAATAGGATACGGATGGGCAATCTTCTTTTATTATCATTTTTG  
 TGGTTCTTTTATGTTTTTTCCGCTCTCACTGCCTTTTGGTATGACCTGGTGCAGCAACACATCA  
 ATGACATATTTAAGTGTGAGTTATTTCCCAAAAGAGCTGCTGGAACCTGTTGCTGTTAGTAGTTT  
 CTTTCGAAATGTGGGCGCTGCCATTAGTTCCGCTATCATTTTACAGCTCTGTAACGCAATGG  
 GAATTGGATGGTGTTTTTACAGGGCTCGGTCTCTGCAGTTCAATTTTATTGATTGGTATATTA  
 TATCTTCTCATTTTTTCAAAGAAAATATACTGCCAAAGAATTTTTAA

>YIL036W 0.81 Cold

ATGTTTACTGGTCAGGAGTATCATTCGCTAGACTCTAATTCACAAGCAAAAAGACAACAA  
 TAAACGTGGTATTGATGACACATCAAAGATCTTGAATAATAAGATACCGCACTCTGTTAGTG  
 ATACTTCTGCCGCCGCCACCACCTTCTACTATGAACAATTTCTGCTTTAAGTAGATCCTTA  
 GATCCTACTGACATAAACTATAGCACAAATATGGCTGGTGTGGTTGACCAAAATACATGATTA  
 TACTACTTCCAATAGAAATTTTAAACCCACAATATTTCTATTGCAGCTGGAACGTCATTT  
 CGCATGATCGGGTTGTTAAACCCAGCGCCAATTCAAACTATCAGCAGGCTGCATACCTTCGA  
 CAACAGCAACAGCAGGATCAGCGACAACAGTCACCCTCTATGAAAACCTGAAGAGGAATCCCA  
 ACTCTACGGTGATATTCTGATGAATTCTGGTGTCTGACAGGATATGCATCAGAATCTGGCCA  
 CTCATACAAATCTGAGCCAACCTGTCGTCTACCCGTAAGTCCGCTCCGAATGATTCTACTACA  
 GCCCGACTAATGCGTCCAACATCGCCAATACGGCTTCTGTGAACAAGCAGATGTATTTTCA  
 GAACATGAATATGAATAACAACCCACATGCCCTTGAACGATCCATCCATCCTGGAACATTTGT  
 CGCCATTTTTTCAACCTTTTTGGTGTGATGTAGCACATTTACCTATGACGAATCCACCAATT

TTCAAAGTTCTTTGCCTGGATGCGATGAGCCAATTAGAAGAAGAAGAATATCAATCTCTAA  
 CGGTCAAATAAGCCAGCTAGGCGAAGATATTGAACTTTGGAAAACCTGCACAACACACAGC  
 CGCCCCGATGCCCAATTTTCACAATTATAATGGTCTGAGCCAACTAGGAATGTATCAAAC  
 AAGCCGGTCTTCAACCAAGCAGTGCCGGTTAGTAGTATTCCACAATACAATGCAAAAAAAGT  
 TATTAATCCCACGAAGGACTCCGCATTGGGTGATCAGAGCGTTATTTACTCGAAAAGTCAGC  
 AGCGAAATTTGTAAACGCGCCATCAAAGAATACTCCAGCGGAGAGTATAAGTGATTTGGAA  
 GGCATGACGACGTTTGCGCCAACTACTGGAGGTGAAAATAGGGGCAAATCTGCACTTAGGGA  
 ATCTCACTCTAATCCTAGCTTCACTCCAAAATCTCAAGGATCTCATTTAAATTTAGCGGCGA  
 ACACACAGGGAAATCCAATCCCTGGTACTACGGCATGGAAAGAGAGCAAGATTGTTAGAAAGA  
 AATCGAATTGCAGCTTCGAAATGTAGACAAAAGGAAAAGGTTGCGCAGCTGCAGCTCCAAA  
 GGAATTTAACGAAATTAAGACGAGAATAGAATTTTACTGAAAAGTTAAATTTACTATGAAA  
 AACTAATCTCTAAATTCAGAAATTTCTCCAAAATTCATTTACGTGAACATGAAAACTAAAT  
 AAAGACTCAGATAATAATGTTAATGGCACTAATAGTAGCAACAAAATGAAAGCATGACTGT  
 GGATTCATTAAGATCATTGAAGAACTTTTAATGATCGATTCAGACGTTACAGAAGTGGATA  
 AAGATACTGGTAAGATCATAGCCATCAAGCACGAGCCATACTCTCAACGTTTCGGAAGCGAT  
 ACTGACGATGACGATATAGATCTCAAGCCCGTAGAAGGTGGTAAGGATCCAGACAACCAATC  
 ATTACCAATTTCTGAAAAGATAAAATAA

>YOR132W 0.81 Cold

ATGACTTCGGCTGTACCTTATGATCCATATGATGATCTGGATAACAATCCATTTGCTGAGCC  
 CCAGGAGGAAGATTCTGAACCTGCTGCAACAACCACAGATGGATCATCTTCTATGTCAGAGG  
 AGCGTGTAGGTACTGAGCAAACCTGCAGCTTCCGTTTCAGGACAACGGAACCTGCAAATAACATT  
 CAAAATGGTCTTGGTGAAGAAGGAAACGCAACACGATCAAAAACCTTCAAACGAACACAATGA  
 AAACCAACAACCATCTCAACCATCAGAACGTGTTATACTTCCCTGAAAAGAAGTGATGAGAAAA  
 AAAAATACACTCTACTTGCAAAAGTAACAGGATTGGAACGATTTGGATCTGCAACCGGTAAG  
 AAAGAGAATCCGACTATTATATTTGATTGCTCCACAAATTTGCCAACATTTTCGCAACAACA  
 ATACAAGAATGTCAAAAATCATACGAAGAATTCACCAATTTGTTCAAATATCTGAATGTTG  
 CCATTCAGGAATCTTTTTGTTCTACTCTTCCCTCTGCGTATACTACATTCGGAATTAATAGC  
 GAAGAAGATAGGATGAAAGTAACGCGAAATTTCCAACCTTTGGTTTAAACAGGCTATCGCAAGA  
 CCCCCTTAATTTATTCGGAATGAAGAAGTGGCCTTTTTTCATTGAAAGTGACTTTAATACGTACA  
 CACCCATCAACAAGTCCAAATCACTCGCATCTGGGTTGAAAAGAAAAACATTGAAACAATTA  
 GCACCTCCATATGATGAAATCACAGAATTAGCAGAATTCGCGCCATTAGTCAAGTCTATATA  
 TGTGTTTTCTCAGAGCTTGCAAGAAAACTGCTAAGAGTTTCCAGAAATCGCAAGATGATGG  
 TTCAAGAAGAAAAATGCCTTCGGCCAGGATTTTCGTTAATCTAGATGAGCACAATAAACTTTAC  
 AGAAGATACGGTAAAATATTGACTGCTGTGGGTGATATTGATAGCATTATAGCAACCATGGA  
 CATGGCGACATTGTACGATGGTTTAGAGTGGATTGTCAGAGATGCTTATGCCGTGAAGGAAG  
 CATTGACCAACAGGCATTTTATCATGCGAAATCTAGTACAGGCACAGCAGAATTCAAAGGCG  
 AAACAGGAACAAGCACGCAGGTTCCGGTCAAGAAGAGATATTAACCCATGAAAATCGATGA  
 AGCACTACGTCAGTTGAAAGCTGCAGCTAAAAACGAACAAGTTTTTGACCCTTAAGCTTCAAC  
 GAATCACGTCCAACATGATTATCGAGAGAAAACAGTGGATTAGCTGGTATGAAGAATGGATA  
 AGAAGCTCGATCAAAGAATTTACACTAAGAAAGATAGAGTATGAAAGAAAGAAGCTGACGTT  
 ACTAGAACGAGTACGTTCTGATATCAGAAAAGCTGATGAAAACGGAGGTTTGTACGCTTAG  
 GACGCCATGCTGTCTCAAACAACAACCTCCGATACTTCTCAAACCCTTAAAGGGGACAGTTGG  
 ACGGGAGAGAGCAACCGCAAAAGTCAAATCCCCATCAACAAGATCGCTCATACCGAATTTGA  
 TGATGAACTATTCACTGAAGACGATGGGTACAACCTCTCAGGACTCAGACACTACATCACTGA  
 ATGCGCGCCATGCTGCTTCACTTTTGGGCATGTCCACTAAATAA

>YKR101W 0.62 Cold

ATGAGAACAATAATGTCAATAATCACACGTCGTTATAAGCAGCTGAAAAATTATAAGATAAT  
 ATCAAAAAAATGCTACAGATCAACTCCAGGCTTGCAGTTATTGATGGATGGCTGGTAGACA  
 CTGTGAAGCGAAAACCAATAAAATTTTCGGAGTCTGAAAGTAAGATTACTGTTACCCAATGAC  
 GATGACTACAAAAGCTATCACAACAAAACCTTGGTGGACTGGACGCGATTAAAGAAGGATTC  
 TAATTCGGTGTCTGTTGGAGTGAATCTATGGAACATTTAAACACATAAAGCTAGTTTTCG  
 GAGAGTTTTTCTTGTAGAAAGATGGAAGAATAATTCTGAAGAGGATCAGAAGCAAATACGT  
 TACAAAGTTGTCAAGAAATTAACCTGTAAATGCTGCAGGTTATATTTACCAAATGGGGCAC  
 CGTGTACATACATCCGATGCTAAAAGATAAAGAAAAGCCCTTAGCGGGGTATGTGAATTTT  
 CATGGATGTAAACCCCTGATCGGGAGTATCCCCTTATTGAGATCAATGTTAGTCATCAATAC

ATTATAATTGAGGGCTTCCTTCTATACTTAAATGAAAGGAGGCTCTATAGGTGGAACGATAA  
 CAATTTGAGGAGTCAGGTTGGCTTAACAAAATGGGCCCATTTAAGAAAACTTACAATCCGG  
 TAAGCCTTGACATACTTTATAGTTTGAATTTCAAATTTTTATTTTGTAAAGGATGATCTGCTA  
 TTTCAATTATTAGGAAAGAGGGTATTTGTAAATTTTGTAAAGTAATGGAAAATGGAAAATG  
 CGGTAAGGCTCCACTGTGGTATCGTGTGAAGAGAACGACAACCTGCCAAAGCAACACATATTG  
 CATATGCCATATCAAATTCACAGCCCCAGATTCATTCAAAAGTAAAAATAACGATTATAGG  
 TTTATTGTGTCAGGGAAAAGCCAATTGTGGAGAATACTATCTCCAACCTGGATTATTCAGACAT  
 AAAAAACAGCAGTTTACTGAAGCAGAGGTTGTAAAAAGAAAGATCTCAGCAGATATTTCTC  
 AAAATAGAGAATGTGCATACGCAATTTAATAGTCAAAGGAAAAAAATAATATCAGGGTGAAT  
 AAGGTTTCTAGCGAGGTCCTAGATCAAATTTTCGAAATTTCTGTGTCCAGAGTCACCTTACT  
 GTTGATGTCTGTGGTCAAGATAAAAATTATATTGAACTTGTGAAGAATTGGCAAGAAGGT  
 TGGAAAAAATATGCATAGAAAAACCACACAATCTTTAGAAGAGATAAGGGATACTTTTCAG  
 GCGAATCCTGAGATGCAGGCTAGCTTTGATAAGGAATATTACCAGAGCATTGAAGAATATAA  
 AATTACACTCGAACTTATTAAGGAAGACCTTTTGATTACTCTGATAAAAACAAATGGAAAATA  
 TGTGGGCAGCTGAAAAAAGTTTAGTACAGAGGAGGAGTATGTTTCGCCGAGGTTTTTAGTA  
 GCAGATGGATTTCTAATCGACCTAGCAGAGGAAAAACCGATTAACCCAAAGGATCCGCGCTT  
 ACTGACACTGCTAAAAGATCATCAGCGTGCCATGATTGACCAAATGAATTTAGTTAAGTGGA  
 ATGACTTCAAAAAATATCAAGATCCTATCCCGCTGAAAGCCAAAACCTTATTTAAATTTTGT  
 AAACAAATAAAGAAAAAATTCCTACGAGGTGCGGACTTCAAGTTACATACATTACCTACAGA  
 AGCAAATTTAAAGTATGAGCCGGAGCGGATGACAGTTTTGTGTTCTGTGTCCCTATTCTTT  
 TGGATGACCAAACCTGTCCAATATCTGTATGATGACAGCATTATTCCTGAATTTGAAGCAACA  
 TCTTCATATGCAACAAAGCAGTCAAAGTGTGGGCGGAAAAATGTCTTTGCAAATGGAGCCTGA  
 CCTCCTTTTTCAAGAGGCCATTAGACGGATGCGACATTTAACTGCTTATGACGTTTTTGAGAA  
 GAAACTATATTGCGGCATTTGAGGAGCTATATATGGGAAACTGTAACGATTAA

>YBR017C 0.81 Cold

ATGGCATCGACATGGAAGCCCGCCGAAGACTATGTGTTGCAACTAGCAACTCTTTTACAGAA  
 CTGTATGTCACCAAATCCAGAGATTGCTAATAACGCAATGGAAGCTATGGAGAACTTCCAGC  
 TGCAACCTGAATTTCTCAATTATTTGTGTTATATTTTAAATTGAAGGCGAATCTGATGATGTA  
 TTGAAGCAACACTACTCCCTACAGGATCTTCAGAACAATAGAGCTACCGCCGGTATGCTGTT  
 GAAAAATTC AATGCTAGGGGAAACAATTTAATTAAGAGCAATAGCCACGACTTAGGATACG  
 TCAAATCAAACATTATACATGGCCTTTATAATTCGAACAATAATCTCGTTTCGAACGTGACA  
 GGTATCGTTATTACTACTTTATTTTCCACTTACTATAGGCAGCATAGAGATGATCCAACCTGG  
 TCTTCAAATGCTTTACCAGTTGCTAGAGCTAACCTCAAATGGAATGAGCCAAGTATTAAGG  
 CTTTATCTAAGATCATGGAAGACAGCGCTCAATTTTTTCCAATTGGAATGTCGGGAAATACG  
 AAGCCTATGGAAGCCTTATTGGATAGTTTTTTTAGGTTTATTTTGAATCCAAATTTCTCACC  
 TGTGATTTCGCTCAGAATCGGTGAAATGTATAAATACAGTGATCCCGCTACAAACACAAAGTT  
 TTATTGTGAGATTAGATAAATCCTTAGAAAATTAATTTTTCAGTTGGCACAAAACGACGAAAAC  
 GACCTAGTTAGGGCACAGATTTGCATTAGTTTTAGTTTTCTTATTGGAATTCAGACCAGATAA  
 GCTGTTTTCCCATTTAGATGGTATTGTACAATTCATGTTGCATTTGATCACCCTGTAAATG  
 AGGAAAAAGTGGCTATTGAAGCCTGCGAGTTTTTGCACGCCTTTGCAACGAGCCCAAATATT  
 CCTGAACATATCTTACAACCATATGTTAAGGATATCGTGCCAATATTATATCGAAAAATGGT  
 CTATAACGAAGAATCCATCGTTCCTGGAAGCTTCTAATGATGATGATGCATTCTTGGAGG  
 ATAAAGATGAGGACATCAAGCCCATTGCACCCGCTATTGTGAAAAAGAAAGAGGCAGGAAAT  
 GGAGAGGATGCAGATGACAACGAAGATGATGATGATGATGATGATGAAGATGGCGATGT  
 TGATACGCAATGGAATTTGAGAAAATGTTCCGCGGCAACGCTAGATGTAATGACGAATATTT  
 TACCTCATCAAGTGATGGATATAGCGTTCCCATTTTTAAGAGAACATTTGGGTTCTGATAGG  
 TGGTTTATTAGAGAAGCTACTATATTAGCACTGGGGGCCATGGCAGAAGGTGGAATGAAGTA  
 TTTTAAATGATGGCTTACCAGCACTAATAACATTTTTAGTGAACAATTTGAACGATAAGTGGG  
 CACCAGTGAGGAAAATGACATGTTGGACATTAAGTAGGTTTTTACCATGGATATTACAAGAC  
 CATACTGAGTTTTTAATTCAGTCTTAGAACCTATAATAAACACATTAATGGACAAGAAAAA  
 GGATGTTCAAGAGGCGGCTATTAGTAGTGTAGCAGTATTTATTGAAAACGCCGACTCCGAAT  
 TGGTTGAACTTTATTTTATAGTCAATTTATGACGAGTTTTGATAAATGTTTGAATATTAC  
 AAGAAAAAGAATTTAATTATATATATGATGCCATCGGCAGGTTTGCTGAAAAATGTGCATT  
 AGACGAGACAGCGATGCAAATAATTTGCCGCCCTTAATGAAAAATGGGCTTTGCTGTGAG  
 ACAGTGACAAGGAGCTGTGGCCACTTTTAGAATGTCTTCTGCGTGGCATCATCACTGGGG  
 GAAAGATTCATGCCATGGCACCAGAAGGTACAACAGAGCCTTTAGAATTTCTATGTCATTG

TGTCGAATTGGAAGCCAAATCACATCAAGACCCGACAATAGTAGTGCCTGAGAAGGACTTCA  
 TCATCACCTCATTAGATTTGATTGATGGATTGGTACAAGGTCTTGGCGCTCACTCGCAGGAT  
 CTATTGTTCCCTCAAGGGACGAAGGATTTAACGATATTGAAAATCATGCTAGAATGTTTGCA  
 GGACCCTGTCCATGAAGTAAGACAAAGCTGCTTTGCCCTGTTGGGAGATATTGTATATTTTT  
 TCAATTCGGAACGGTAATTTGGTAATTTGGAGGATTTCTTGAAGTTGATTGGTACGGAAATA  
 ATGCATAACGACGATAGTGATGGTACTCCTGCTGTGATAAATGCGATATGGGCGCTTGGTTT  
 GATAAGCGAACGTATCGATTTGAATACTTATATCATTGATATGTCTAGAATCATTCTAGATT  
 TATTTACCACCAACACACAAATCGTAGACAGCTCTGTGATGGAGAACTTGTCTGTGACCATC  
 GGAAAAATGGGGCTAACACACCCTGAAGTTTTAGTTCTGGCGCATTTGCCAATGATTCCAA  
 CTGGAATAAATGGTGTGTTGTCCGTTAACGCATTGGACGATGTAGAGGAAAAGAGTAGCGCGT  
 ACATGGGTTTTCTGAAAATTATCAATTTGACCAGCACGGAGGTCACAATGAGTAATGATACC  
 ATTCATAAAATTGTTACGGGCCTTTCAAGCAATGTAGAGGCGAATGTTTTTGCACAAGAGAT  
 CTACACTTTTTTGATGAACCATTTCTGCCAAAATTTCTGCAATAAATTTACGCCCGATGAAA  
 TCTCCTTCTTACAACAGTTCACCAGCTAA

>YBR226C 0.79 Cold

ATGAATGGTATAGAATATATAAATATAGATGTAATAAATGTAGTAAATGAACAAATAATCTT  
 CCTACAAAGTACTATGCCATGGGAAGTAAAAAATTAATAAATATTGGCTAAAGTGTTTCA  
 AATTGGTTCTACGATACTGGGAGACTACTCCTTATCATAATGCTTTTTTGTCCAGTAGTAAAA  
 ATTGAAGTAATTTCTTGAACAATTTAAAAAATTTGGAACGGCGGCACAATTTATTTGGTATA  
 TGGCAGCTTTGGCTTTTTGCGCCACCACATACAAAGTTCTAAAGCAGCCAGCGTTGTTCATCGA  
 TTTTTTCTATGTGTTCTTCCACATATCTTTTGAAGAGAGTGGTGGGGTCGGTATCCTTTGGA  
 GGACAACACTACTATCTGGTAGTTGCCTCCTTAACATGTAG

>YLR223C 0.78 Cold

ATGGCAGGCCAAAAAAGTCCCTCGAAAAAGTACGATCAATCATAGTACACATTTCTGGTAAACT  
 GCCAGCAAATATTAAGAGGCTCATAAAAAAGGCGAATCCGATACAAAGTCCAGGCAATCAC  
 CACCCACACTGAGTACAACGAGGCCAAGAAGATTTAGCCTTATATACTCTTCTGAGTCATCC  
 TTGAGTGACGTATCTGATTCTGATAAAAAACAAAAGTACAAACCCACATAAAATTAAGAAA  
 AGCAAAGAACATTTCAAATAATTTCCCAAGGAAAAAAGTAACTTATACAAAGGCCAAATAG  
 ACAATGACGACGAGGGCACAGAGTCAATCCGATTACCAAGCTGTAACAGATGGCGAAGAGAGT  
 GAAAATGAAGAAGAAGAGAGTGAAGAAGAAGAAGATGATGACGAAGACGACGACGACGA  
 TGATGATGACGGAAGTATAGTATGATAGTATGATAGCGAAACAAGTTCTGATGACGAGAATATAG  
 ATTTTGTCAAACCTGACGGCCCAAAGAAAGAAAAGAGCCATGAAAGCTTTATCTGCCATGAAT  
 ACAAATAGCAATACACTCTATTCCTCTCGTGAGAACAGTAACAAAAATAAATCAGTTAACT  
 ATCCCTAAGAAAGAAAATGAAGAAGAGCAGAAAGAAGAAAAAGAAAAGAGAAAAGAGAGC  
 AACAAAAACAACAAGAATCAAACAAAAAAGAAGTAAACGGTTCAGGCACTACTACTACACAA  
 CAGGCGCTATCGTTTAAATTCAAAAAAGAGGACGACGGCATTAGTTTTGGTAATGGTAATGA  
 AGGCTATAACGAGGATATAGGTGAAGAAGTCTTGGATTTAAAAAACAAGAGAACAATGGTA  
 ATGAAGAAGATAAATCGGATTTCTAAGGTGATGTTAGGTAACAACGATGAGTTACGATTTCCC  
 AATATTTTCAAGTCAAGATGAATCTGAATATGATATTGACCAGGATGCGTACTTTGACGTGAT  
 TAACAATGAAGATTTCTCATGGAGAAATTTGGTACAGATCTTGAAACGGGGGAAGACGATCTTC  
 CCATATTTGGAAGAAGAAGAACAACAAACATTTGTTTCTGAGCTACAAAATGACGACGAACCTCA  
 TTCGATGGTAGTATACACGAAGAAGGGTCTGATCCTGTAGAAGATGCTGAAAATAAATTTTT  
 GCAAAATGAATACAATCAAGAAAACGGATATGATGAAGAAGATGACGAAGAAGATGAAATAA  
 TGTCTGATTTTTGATATGCCGTTTTATGAAGATCCTAAATTTGCAAATCTTTATTATTATGGC  
 GATGGTTCAGAGCCAAAGCTATCCTTGAGTACATCTTTACCCTTAATGCTAAATGATGAAAA  
 ACTATCTAAACTAAAAAAGAAAGAGGCCAAAAAACGGGAACAGGAAGAAAGGAAACAAAGAC  
 GAAAGCTCTATAAAAAGACGCAAAAACCTAGTACGAGAACAACCTCCAATGTGGACAATGAT  
 GAGTATATTTTCAATGTTTTTTTTCAATCAGATGATGAAAATAGTGGCCATAAGAGCAAGAA  
 AGGCAGGCATAAATCGGGCAAAAAGTCAATTTGAACATAAGAATAAAGGCTCGAATTTGATAA  
 AATCCAATGATGATCTGGAACCATCCACTCATAGTACGGTCCCTGAATTCGGGAAATATGAT  
 TCTTCTGACGATGAATATGATAACATTTTGTGGATGTTGCCCATATGCCCTCAGATGATGA  
 ATGCAGTGAATCTGAAACGTCCCACGATGCTGACACGGATGAAGAATTGAGGGCACTAGATT  
 CAGATAGCTTAGACATTTGGCACAGAACTGGACGACGATTACGAAGACGACGACGATGATTC  
 AGCGTGACAAATGTGTTTCATAGACATCGATGATTTAGATCCAGACTCTTTTTACTTTTATTA  
 CGACAGCGATGGATCTTCTCTTTGATAAGTTCTAACTCAGACAAAGAAAATTTCTGATGGAT

CCAAAGATTGCAAACATGATCTCTTAGAGACTGTTGTGTACGTTGATGACGAATCCACAGAT  
 GAAGATGATAACCTACCGCCCCAAGTTCAAGGTCAAAAAACATTGGCTCAAAAGCAAAGGA  
 AATCGTAAGTTCAAATGTTGTTGGATTACGTCCACCAAAATTTGGGTACTTGGGAGACGGACA  
 ACAAACCTTTTAGTATTATTGATGGTCTGTCTACTAAATCATTATACGCCTTAATCCAAGAA  
 CATCAACAGCTTCGCGAGCAACATCAAAGGGCTCAAACCCAGATGTTAAAAGAGAGGGAAG  
 CTCTAATGGCAATAACGGTGACGAATTGACACTCAATGAGCTGCTAAACATGAGTGAATTGG  
 AGGATGATTACCATCCACACAGACGATATGGAGAACAATTACAATGATGCAATTAATAGC  
 AAAAGCACAAATGGCCATGCTGCAGATTGGTATGAAGTTCCTAAGGTTCCATTATCTGCATT  
 TAGAAATAAGGGTATTAATGCCATGAAGAAGATGAGTACATGATACCAGCAAATTTCTAACA  
 GAAAAGTTCCCATTTGGCTATATTTGGTAATGAAAGAACAAGAAAGAAGATTGATAAGATGAAA  
 GAGCTACAACGGAAAAAACTGAAAAAAAAGGCAGTTAAAAGAAAAAAAAGAAGCTTCTTAA  
 AATAAGAAAGCAAAGACAAAAGGCAATAAAGGAGCAAGAACTATGAATTTACAATTTGGGAA  
 TCAATGGCCATGAGATCATCGGTAACAATAACAGCCATAGCGACATAAAATACCGGTACCGAT  
 TTTACAACCAATGAAAATACCCCTATGAATGAACTTCCCTCTCACGCACCTGAAGATGCGTC  
 ATTAATACCTCATAATTCTGATCTTGCCGTGGACAGCAATACAAGGAAAAATTC AACAAAA  
 GTGTTGGTTTTAGATGAAATTCATGAGATTTTGGGCAAAGATGAAAATGACTTACTGTCTGTA  
 GGTGATATTAACGGTTATGATGCACAAGAAGTTCATGTGATCGAAGATACTGACGCCGATAT  
 CCTAGCATCGTTAACCGCTCCTGTGCAATTCGACAATACATTAAGCCATGAAAATAGTAATT  
 CCATGTGGAGAAGAAGGCAAAGTATGGTGGAAAGCAGCGGCTGAAAATCTTCGTTTTACTAAA  
 AATGGTTTTATTTAGTGAGAGTGCATTGGCAGATATCGAAGGAATTATGGGCAATGATGTTAA  
 CCATTCATTGCAATTC AATGACGTCTTACAATGA

>YEL010W 0.79 Cold

ATGGGGAAATATTCATCATGTAGAATTTCAAATATTTTCATTGTAATTTCTAAAATTAATGA  
 GGAAAATTCGATATATCTGGTATCACTTTTATTATTCCTTCAGCACGAAAATGTCGAGCGATCT  
 CGATGCAGGAACCAGGTATAAGTAGCGATAGTAAATTTTTTTCTCTCTTTTTAATAATCCGG  
 AAAGTCTCAGTTGCGAGTGATTGCAGACAGTTGTATGAATGTAAAAAAGTAATGAAAACAT  
 TTGGGAGTATTTCAAACGGAGGTTAGAGACGAGGCTTTTCGAGCTTTTCTATTATTTTAAGTG  
 CTGTGTTTTCCGGACGTGCTCTTCACTTTCTTATTTTCTTGA

>YLR019W 0.82 Cold

ATGGGATTTATAGCAAATATACTGTGCTGTTCTTCAGATACTTCCAAAACACATCGTCAACG  
 CCAACCACCAGAACTAATCACACC GCAACCGCAACCGTAAGCACAGTTCAAACAAAGCTC  
 AAATCAGGGTCGTAAGCAGAAGGCTACTCCAACGGCGACAAGATGCAATATTCACACCG  
 GAGATCCTTTTTGTCTAGTTCCGATTCAGGCAGCAATGCGGGTTCCAAGACAATGCAGGAGAA  
 TGGGAATAGCGGCAATGAAAAC TAGCACCTTTATCAAGAGATCACTCCAACAACCTCGTACG  
 ATGAGGAGAAAGAATATGAAGATTATAATGAAGGAGACGTAGAAATGACGGAGGTTAACAAT  
 GCCGGAGAAGAAGAAGAAGATGACGAAGCAAAGAAAAGCAAGACCATGTCGTTTCATGA  
 ATATAACGTTGACGCAGATAGAAATTCAGTATTAATGACGAGGCGCCACCACAACAGGGTC  
 TGTATCAGGTGGGTCAAGAAGATATGAATCCACAATATGTCGCCAGCAGTCTGATAATGAT  
 TTAACTTGATACCTACAACGGAGGAGGACTTCTCTGACCTGACGCATTTGCAACCAGACCA  
 GTACCATGCCCCGGATACGACACTCTGCTACCACCCAAGTTGCAAGAATTTCAACAGAAAA  
 AATGTC TGATATGGATCTAGACGAACTTTGGTACATTCCTTCTTTAAATATATGCATTC  
 GCTGATTTTCGTTTTGCCCGTCGAAATCGATGATCAAGTTCACAATGTCTATGTTATTAAGAG  
 GCCAGGCGTCGATGAGTTCTTGAACAGGGTGAGTCAACTATACGAAGTTGTTGTGTTACGG  
 CAAGTGTTCGAGGTATGCAAACCCCTTTTAGATACGTTGGACCCTAATGGAACCATCCAT  
 CATCGATTATTCAGAGAAGCTTGTTATAACTACGAAGGTAAC TACATCAAGAACTTATCGCA  
 GATCGGAAGACCATTTGTCGAAACAATCATCTTAGATAAATTCGCCGGCCTTACATCTTTC  
 ATCCGCAACATGCTGTTCCGATATCTTCTTGGTTCTCTGATACTCATGATAATGAGTTACTA  
 GATATTATCCACTTTTGGAGGACCTTTCATCAGGAAACGTGTTGGATGTGGGGAGCGTGT  
 GGATGTGACGATATAG

>YGR005C 0.72 Cold

ATGAGCAGTGGTTCAGCAGGGCACCAGCACTTTCTAATAATTCCACGAACTCTGTGCGGAA  
 GGAGAAATCAGGTAACATTTCCGGTGATGAGTATCTTTTCGCAAGAGGAGGAAGTTTTTGACG  
 GTAATGATATTGAGAATAATGAAACCAAAGTTTATGAAGAATCCTTAGATTTGGACTTGGA  
 CGTAGTAATAGACAAGTCTGGTTAGTTAGATTGCCCATGTTTCTAGCAGAGAAATGGAGGGA

CAGAAACAACTTGCATGGCCAAGAACTGGGTAAAATTAGGATAAAACAAGGATGGGAGTAAAA  
 TCACACTTCTATTGAATGAAAATGATAACGATTCTATAACCGCACGAATATGATTTAGAAGTT  
 ACAAAGAAAGTAGTAGAAAATGAATATGTTTTACAGAACAAAATTTAAAGAAATATCAACA  
 ACGTAAAAAGGAGTTGGAAGCAGATCCTGAAAAGCAAAGGCAAGCTTACCTGAAGAAGCAAG  
 AACGTGAAGAGGAACTTAAGAAGAAGCAGCAGCAGCAAAAACGTAGAAAATAATAGAAAAAAG  
 TTTAATCACAGAGTTATGACAGATAGGGATGGTAGAGATAGATATATACCATATGTGAAGAC  
 GATCCCAAAAAAACC GCCATTGTGGGTACAGTTTGCCACGAATGTCAGGTTATGCCATCAA  
 TGAATGATCCTAATTATCACAAGATTGTTGAACAGAGAAGAAATATTGTCAAGCTTAATAAT  
 AAGGAAAGGATCACAACCTTTGGATGAAACCGTTGGTGTACGATGAGCCACACAGGTATGTC  
 CATGAGGTCAGACAACCTCGAATTTCTTGAAAAGTGGGGCGTGAGAAGGCCAAGAGCAATATTA  
 AATCTATTCGTATGCCAAAGAAGGAAATCTTGGATTACTTGTTCAGTTATTTGATGAGTAT  
 GACTACTGGTCTTGAAGGGGTTGAAGGAACGTACTAGGCAACCTGAAGCACATTTAAAGGA  
 GTGTTTGGATAAAAGTTGCCACTCTAGTGAAGAAGGGCCCATATGCATTCAAATACACTTTAA  
 GGCCAGAGTATAAAAAGTTGAAAAGAGGAGGAGAGAAAGGCAACCTTAGGTGAACTAGCTGAT  
 GAGCAAACAGGTTCCGCTGGAGACAATGCGCAAGGAGACGCGGAGGCTGACTTGGAAGATGA  
 AATAGAAATGGAAGATGTCTGTTTAG

>YNL166C 0.81 Cold

ATGGGCTTGGACCAGGACAAGATAAAGAAGAGGCTTTCTCAAATAGAGATAGATATCAACCA  
 GATGAACCAGATGATTGACGAAAATTTACAATTAGTTGAACCTGCGGAGGACGAAGCTGTCTG  
 AAGATAATGTCAAGGATACGGGTGTGGTTCGACGCTGTAAAGGTGGCAGAAACGGCTCTTTTT  
 AGTGGCAATGATGGAGCGGATAGTAACCCAGGAGATTCAGCTCAGGTTGAAGAGCACAAAAC  
 CGCACAGGTCCATATTTCCACTGAGAATGAAGCGAATAAGAGTACGGATGACCCATCCAGC  
 TATCGGTTACTCAACCTTTTATAGCGAAAAGAGCAGATAAACTCACACCGCCATTGCTATTGGT  
 GACTCCTATAATTCATTTGTCTGCAAATTTCCGCTGGAAATGAAAAGGCAAAGGACTCCTGCAC  
 TGAGAACAAAAGATGGTACAGTCAATATAGATCAAAAACAGGGGTGAAGCTGATGTTGAAA  
 TTATCGAAAATAATGATGATGAATGGGAGGATGAAAAATCGGATGTTGAAGAGGGGCGAGTA  
 GATAAGGGAACAGAGGAAAACAGTGAGATTGAATCTTTCAAATCACCCATGCCCCAGAATAA  
 CACCTTGGGCGGTGAGAACAAGTTAGACGCTGAACTTGTATTAGACAAAATTTTCTTCCGCTA  
 ATAAGGATCTAGATATACAACCGCAAACCATAGTTGTAGGAGGTGACAATGAATACAACCAT  
 GAGAGCAGCCGTTTAGCTGATCAAACACCCCATGACGATAATTCAGAGAATTTGTCCTCAATCG  
 CTCTGGAGGAAGCACTCCCTTAGATTCTCAAACCTAAAATTTTATCCCTAAAAGAATTCTA  
 AAGAAGATGGTACCAATATAAATCACTTTAATTCAGATGGTGTGATGGACAGAAAAAATGGCG  
 AATTTTCGAGACACGACGCCCTACAATCCGTTTCAGAGTTATCTCGGTGAGCAGCAATTCCAA  
 TTCAAGAAACGGAAGTCTGTAATCTTCACTAAATAAGTATGATTCGCCAGTCTCCTCTCCTA  
 TCACATCAGCGTCTGAGCTGGGCAGTATTGCCAAGCTGGAAAAAAGACATGATTATTTATCC  
 ATGAAATGCATTAAGTTACAAAAGGAAATTTACTATCTAAACAAGATGAATGCACAGGGTTT  
 TTTATCTATGGAAGACGGAAGAGACTACATAGAGCCGTAGTGAAGCTTCAAGAATATCTTG  
 ACAAGAAAACGAAGGAGAAATATGAGGTCGGAGTGTATTAAAGTAGACATCTGAGAAAAGCAA  
 ATTGATCGTGGCGAAAATGGCCAATTTTGGATTGGAACATAATGA

>YDL193W 0.78 Cold

ATGCCACGATGATCAAAAAGGATGATAAAGCAATGGAGCCCCCTAATGAAAAACCGCATAG  
 AAAGATCGAAAAGAGATGATGTTCCAGAATCTTCCAATCACATCCCACCTCCAGAATCTGGTG  
 TTTTAAAGGGCGGTAAAGTTAATTCAAAACCCAGAGCTTTAAAGGCCGTTACAAGTATCATT  
 GCAGACGCCGATGAGAACCCTCAGAAGAAAGTGAACAATGAGACGAATGGAGTCCAAAAGCA  
 AAAGACAGAAGATTTGAGTAAAAGAATAGGTAAATTTGAATACCTTTTTTACAAGTTTTTAC  
 TTGTGTTGTTATACATCTGCTTCGGGTTGTTTCGGTACGGTCAATACCAATATAATAAAATG  
 AAATAAGAATATTCAGTATCATCTACAACCATGCATATACACCACAGTTGATTAGACAGGA  
 CGTTATTCCTCTGAAAAAATTCCTAAAAGGTTGGCCGCTATCTTGGAAAGTCAAGCCAGTTG  
 GCGACGTTGGCGGCGGTGTGACAGGTTTATTAATGACGCGAGTGAAATTTGTTTGCTGGACT  
 GTTTCAGCTGGTATAAAAACATTTGATGTTGTACGATTACGATGGAATATTACAAAGAAATGT  
 TCCAGAGCTGAGAATGGAATTCATTCCAACCTGGCTAAATATTTTGGGCCAGCTCATGTTT  
 CAACTACGCTGTTAAAATACCTCATTCTAACAAGATATCTACAATCTAGACGGAATTGAA  
 ACCGAGACTGATGTAGGCAATGAGATAGAAGCTAACCAAGAAAAGGACAAAATTGCTATTGA  
 AATTTCTTTATTGTCTAACAGAGATGGTAGAGAAACGATTGTCTGATCTGACCAAACTATGG  
 CTGAGTTATGTGCGGTTAACGAATTTAGCGTCTTCTGACATCACAATGGATTTAGTTGATTC

GAAGTAAACAAGTGGACCCGAACCAGATTTACTGTTATACTTCGGGCCTTCGTTGGA  
 TTTACAAGGGTTCCCACCTTGGCATATTAGATTAACCGAATTTTATTGGGAAAAAGATAACA  
 ACGAAGTCATATATTCGGTTTTTCATCCGCGGCCTAAGACAGTACGCAGGATGTAAAGTGAAT  
 GTTGGTAAATGA

>YOR304C-A 0.78 Cold

ATGAGTACTGAAAACTGGAAGCTTCGGAGGAACCACAGGCTCCCTTGGCCAATACATCTGA  
 GACTAACTCAATAAAGGGAGATACAGAAAAATTTGTAACCGTGTGGACCTGGCAAATGAAA  
 TAGAAAAATCACTAAAGGATGTTTCAGAGGCAAATGAAGGAAAATGATGATGAGTTTTTCACGC  
 AGTATACAAGCAATTGAAGACAAGCTTAACAAAATGAGTCGGTGA

>YDR280W 0.8 Cold

ATGGCCAAAGACATTGAGATATCCGCATCCGAGTCAAAAATTTATCTTAGAAGCACTGAGACA  
 GAATTATAGGTTGGACGGCCGCTCCTTTGATCAATTTTCGTGACGTGGAAAATAACGTTTGGTA  
 AAGAATTTGGTGATGTTAGCGTAAAAATGGGCAACACCAAAGTTCCTGCAGGATTAGTTGT  
 CAAATAGCACAACCATACGAAGACAGGCCATTTGAAGGATTATTTGTAATATCTACAGAAAT  
 ATCTCCTATGGCTGGTTCTCAATTTGAAAAATGGAATATCACGGGGGAAGATGAAGTTTTAT  
 GTTCAAGAATAATTGAAAAATCTGTTAGGCGGTTCGGGCGCATTGGACGTGGAAGGACTATGT  
 ATCGTTGCTGGCAGTAAATGCTGGGCTGTGAGAGCTGATGTACATTTCTGGATTGTGATGG  
 TGGATTTATTGACGCTTCGTGTATTGCCGTTCATGGCAGGATTGATGCATTTTAAAGAAACCAG  
 ATATAACTGTCCATGGCGAGCAGATCATTGTTTCATCTGTTAATGAAAGAGAGCCAGTTCCA  
 CTAGGTATACTGCATATTCCAATATGTGTAACTTTTTCTTTCTTCAATCCTCAAGACACCGA  
 GGAAAACATAAAAAGGTGAGACTAACTCAGAAAATTTCCATCATTGATGCAACATTGAAAGAGG  
 AACTACTGCGAGATGGTGTATTGACGGTTACGCTAAACAAAAACCGTGAAGTGGTACAAGTT  
 TCCAAAGCGGGTGGTTTTACCAATGGATGCGTTGACGCTAATGAAATGTTGTACAGAGCCTTA  
 CAGCATTATTGAGAAAATAACTGATCAAATACTGCAGCTTTTAAAGGAGGATTTCAGAAAAGA  
 GAAACAAGTATGCAGCCATGCTTACATCTGAAAATGCCCGCGAGATCTAA

>YNL335W 0.8 Cold

ATGTCACAGTACGGATTTGTAAGAGTTCCCTAGAGAGGTAGAAAAGGCCATTCAGTGTTGAA  
 TGCACCTAGACCACGGGCGGTTGTTCCGCCCTCAAACAGTGAAACTGCTAGGCTTGTTCGGG  
 AATATGCCGCTAAAGAATTGACTGCCCGGTTCTAAACCACTCTTTGCGTGTTTTTCAATAT  
 AGTGTAGCTATCATAAGAGACCAATTTCCAGCATGGGACTTGGATCAGGAAGTTTTGTACGT  
 CACCTGCTTACTTCATGATATTGCAACAACAGATAAGAATATGAGAGCCACGAAGATGTCAT  
 TTGAGTATTATGGTGGCATACTTTCAAGGGAGCTTGTATTTAATGCGACAGGTGGAAATCAG  
 GACTACGCAGATGCAGTAACTGAGGCCATCATTTCGTCCAGGATTTGACTGGGACTGGCTA  
 CATTACCACCTTGGGGCTCATTCTGCAGATTGCTACTACGCTTGACAATGTCGGATCCAATA  
 CCGATCTGATTCAATCGATACAGTTAGTGCCATTAACGAGCAATTTCCAAGACTGCACCTGG  
 TTATCATGTTTTGCTACGGTGGTGGACACTGAAAACCTCGAGAAAACCGTGGGGCCACACCAG  
 TTCTTTGGGTGATGATTTTTTCAAAGAAAGTCATATGCAATACATTTGGGTATAACTAA

>YNR072W 0.67 Cold

ATGCAATCATCCACTGAAAGTGATAGAGATATTCAGGATGGTCCCTGATGCTGATATTCACGT  
 CGCACCACCCGTGAAAAAGAGTGGTCAGATGGATTTGATGACAACGAAGTCATAAACGGGG  
 ATAACGTTGAGCCACCAAAAAGAGGGCTCATAGGTTATCTTGTCAATTTACTTATTGTGTTAT  
 CCAATATCCTTCGGGGGTTTTCTGCCTGGTTGGGATAGTGGTATCACAGCAGGTTTTCATTA  
 CATGGACAACCTTAAAATGAACTTCGGTTCTTACAAGCATAGCACTGGTGAATATTATTTGA  
 GCAACGTGCGTATGGGTCTTCTTGTGGCTATGTTTCAGTATTGGATGTGCCATAGGTGGTCTT  
 ATTTTTGCCCGTCTTGGCTGATACCTTAGGTAGAAGGCTGGCAATTGTAATCGTGGTGTGGT  
 ATATATGGTTGGTGCAATTATTCAGATCAGTTCGAATCACAATGGTACCAATACTTCGTTG  
 GTAAGATTATCTATGGTCTTGGTGTGGTGGCTGTTCCGGTGTGTGTCCAATGCTTTTGTCT  
 GAAATAGCTCCTACAGATTTGAGAGGTGGACTTGTCTCATTTGTACCAACTTAACATGACCTT  
 CGGTATTTTCTTGGGTTATTGTAGCGTTTATGGTACGAGAAAATACGATAACACTGCACAAT  
 GGAGAGTCCCCTTGGGCTTTGCTTTTTATGGACTTTGATTATCATCATTTGGTATGTTATTG  
 GTTCCAGAGTCCCCAAGATATCTTATTGAATGTGAGAGACACGAAGAGGCCCGTGCCTCCAT  
 TGCCAAAATCAACAAGGTTTACCAGAGGATCCATGGGTACTCAAACAGGCTGATGAAATCA  
 ACGCCGGTGTCTTGGCCAAAAGAGAAGCTTCATGGAAAAGAACTTTTCTCCGCT



AAAAC TAAAGT CCTTCAACGTTTGATCACAGGTATTCTTGTGCAAACCTTTTTGCAACTTAC  
 TGGTGAAAAC TACTTTTTCTTCTACGGAAC TACCATTTTCAAATCAGTCGGTCTTACTGATG  
 GGTGAGACGTCGATCGTTCTAGGTACAGTGAAC TTTCTTTCCACTATTATTGCTGTTATG  
 GTCGTAGACAAAATTGGCCGTCGTAAATGTCTTTTATTTGGTGCAGCTGGGATGATGGCTTG  
 TATGGTCATATTTGCAAGTATCGGGGTGAAATGTCTTTACCCTCATGGCCAGGATGGTCCAT  
 CCTCAAAGGTGCAGGTAATGCCATGATTGTGTTCACTTGCTTCTATATATTTTGGCTTTGCA  
 ACGACATGGGCTCCTGTTGCTTATATTGTGGTTGCCGAGTCGTTCCCTTCGAAGGTCAAATC  
 TAGGGCCATGTGATTTGACTGCATGCAACTGGTTGTGGCAATTTTTGATCGGGTTTTTCA  
 CACCATTCACTACTGGGTCTATCCACTTCTATTATGGTTATGTGTTGCTAGGTTGTTGGTT  
 GCAATGTTTCTGTACGTTTTCTTCTTTTTACCAGAAACGATGGTCTATCTTTGGAGGAAAT  
 CCAATTACTATATGAAGAAGGTATAAAACCATGGAAATCTGCATCTTGGGTCCCACCTTCTA  
 GGAGAGGTATTCTTCCGAAGAAAGTAAGACCGAGAAGAAGGATTGGAAGAAATTTTTGAAG  
 TTCTCAAAGGGTTCTGATTGA

>YJR126C 0.81 Cold

ATGAGAATGATACAGAGAGAGAGAAAGAGAGAGAAAGAGGAAGGTCAATTAAAGGAGAGAAC  
 TGTGTTAATATGGCAGACCTGATGACAATGAGGCCGAAGCCACTGGATTACAACAATATA  
 GTGGCGAGACCACTCGCGATGACAATGAAGAAAGCATGAATGATTCTTTCACTTTAACATCC  
 AGGAATAGAGGCAGAAGTAATACAATATCTAGTATTGTTAGTGGTTATGAAATAATGAAAGA  
 ACATATGGACAAGGAAAAGTTTATGTACTTGATTCTAGCGAGTCTCCTTTTGTACATGGGAT  
 TTGTTGCCGCATTTGCTCCCAGGACGCTTTTATCAAGAGACTTTCGGCGGTTTCACTCTTCC  
 AGATTGACGAATGCAGAGGTTTATAGGATATACTTGAACCTTTGCAACAGGAAAATAGAGC  
 GAAAGAACATGTATACAAGTATGCTGGGTACATGAGCAACGGAGCAAGTGATTTCGTCAACGT  
 TTAATATACCTTGGACGAGTTTCTAGATATGGGGTACAAACCCAAAGTTGAAAAATATTAC  
 CCATGGATAGGTGAACCAGTAGACACTAACGTAGCTCCTTTAGAAAATGGTAAAGTGGTCTA  
 CGAAGCAAGCATGATCGAGGATAGAGTTAAAGGTGATCCTGCTTCTCACGCTAGGAAAAGGC  
 AAAAGGGTTTTCCATCAATATTTCAAAAAATGGAAGTGTAAGTCTCGATACGTGTTTTGCAAT  
 TATGGTAGCATCAGTGATTACAAGCTACTTTTGAAGAAAAACATTGATATTGAAGATAAAAT  
 CCACATCGTACGATCGGGTAAAATATTACCTGGATTAAAGGTAAAGAATGCAGAACTTTATG  
 GCGCTTCCAGTGTCATTATATATACAGACCCATTTGACGATGGTAAAGTTACTGAGGAAAAT  
 GGGTTTTTACACTATCCTTATGGACCAGCAAGAAACCCAAGTTATATTAGGAGAGATTCTGT  
 AAATATTTTCACTGACACTCCAGGAGATCCGACAACCTCCAGGGTATCCCTCCAAGGATTCCG  
 AACTGAAACATATGTCACCGGTAGGGAGAGTGCCGAGGATACCATCGGTGCCGATGAGTGCT  
 AGAGATGTCCAACCAATTTTAGAAAGATTGAATGGCAGGGGTTTTCAAATTTGGGCCCGGTAG  
 TAATATAAAAGATTTTGGATCATTTCACTGGACCTTCAAGCTCTATCGATAAAGTCCATTTGC  
 ATAATGAGCTAACTTACAACATCAAGGAAATGAGTAGTGTAGAGGTTAGTATCCCTGGTATA  
 TTCCTGAGGGGGAGATTATTATCGGAGCTCATAGGGATTGCTCGCTCGCTCGAGTAGCGCCGG  
 TGATGCAAATAGTGGCAGCGCTATTCTTTTAGAAATTGCACGAGGAATGAGTAAATTACTTA  
 AGCATGGTTGGAAGCCACTGCGTCTTATCAAAC TAATAAGTTGGGATGGTGAACGATCCGGC  
 CTTCTGGGATCTACAGATTATGCAGAAGCTCATGCTGCGATTCTCAGGAGAAGGGCCTTGGT  
 ATACCTAAATCTAGATAATGCAATCTCTGGGACAAATTTTCACTGTAAAGCCAACCCACTTT  
 TACAAGACGTGATATACGAAGCTGCTAAGCTCACGGAATTTAATGGGCACGAAGACTGGTCA  
 TTGTTGACCATTTGGAATAACACTTCTAATGCCACTATTCTCTACTTGATGGGTTGTCTAG  
 TTACACTTCATTTCACTACCATCTTGGAGTGCCCGCTGCACATTTTCACTTTAATGCCAATG  
 ATACTTCAGGCGCAGTCTATCATAGTAACTCCGTATTCGATAGCCCAACTTGGTTGGAAAAA  
 TTTACCAATTCTGACTACAAGTTACACAACACCATGGCCATGTTTGTAGGTTTGACAACGCT  
 GATGCTGAGTGAAAACGAACTGGCAAGATTCAATACACATGTTTACCTGAAGAAAATATATA  
 ACTGGTATATCGCATGGCACTCTAATCTATCTTTCAGCATTTCCCAGGACGATGAAGTGAAC  
 AGCTTAGCAAAAAGGGTTCTGGACTTATTTAAAAGTTGCCACACAGGAAGATAGCATCCAATT  
 TGACCAACAAAATGGTATTCTCTATAAAGAGTGTAGGGAAGCTTTACCTGTTTGGGCTTTTT  
 ACAAAAAAATCAAGAGCTATATTTAAACTGCAACGATCCAATAGCAAATCAAAGCAAATTTGAT  
 CAATTATTTATTACACACAGAGGACTGAAAGACAGGGAATGGATGAAGTACTCTCTTTTAGC  
 ACCTAGTAAGTTTGGGGATCTGTCCGGGAAGTTTTGCCCGGCTTTCACGAAGGATTGGCTG  
 ATATTGATAGAAACGAGGTCAATTCAGTGGTTAACCATTTTGCTAAGCCAATTCAGCAACGTT  
 CGCTATTTACTTCAATAA

>YOR021C 0.75 Cold

ATGAAGTACATTATTGAGCATATGGAGGAAGGGTTTAGTGAATGGGTCATTTTAGAGTATAG  
 CCAAATCCTGAGAGAAGTAGGAGCTGAAAACCTTGATTTTATCATCGTTACCAGAGAGTACCA  
 CGGAAAAGGACATCCCTCAAAGGCTACTAAAACCTGGTTTAAAGATGGACTACAAAGGATTTG  
 AAGGGCATTAAACGAAGATTTCAAGGATTTGGAAGCTGTTAAAAGATGGCAGAGTCTGTCTATT  
 GGACCCTAGGGCTACAATCGATTTACAGCCGGAGGATGCTACGAAATTCGACTATTTCTGTAT  
 TTGGTGGCATATTGGGTGATCATCCTCCAAGAGATCGTACCAAAGAACTAAAGACTGCCAT  
 CCGAATCTTTTAAATTAGCAGAAGACTAGGTGATAAACAAATGACTACGGATACTGCCATAAG  
 AACACACAGTTGATTATCAAAGACAGGATGCAATTTGAAGACATCAAGTTCATTGACTACC  
 CTGAATTTAGGTTCAATAAAAAATGAGGCCACGGAAATGCCATTTAGATACGTTTTAGATAAA  
 GAAGGTAAACCTATTTTGCCTGAAGGGATGTTGGATTTGATCAAGAAGGATTTCTGCTCAAAG  
 TTTGGACGATCTGTTGATGTAG

>YOR022C 0.64 Cold

ATGCTACGGTTTACTCATCGAGGCCTTCCCTCCAGCACTCGTTTTAGAAACATTTTCGTAAG  
 GTTAAATCACATTTATGTACCATGGTTCTATGCCATAGACGTACCCAACCTCAAACCCCTATT  
 TACCCACATATCAAACCTTTACACTCACCCAAAAAGTTTAAAGCCGTTCTCCGTTGATGATTCT  
 AATCGTTTTGAAAAGGCCAGTAAGCGTCAAGAACGCAGGCCCTGTTTTAGTCAACGAAGATTA  
 CCTGTTTTAAAGTCGACCTCTCTCACATGGAAATTTGTCCCTACCTATTGGGAAGGCCCTACTT  
 ATCAAGTACGAAGAGGTGTGTGGTTCGACTCTTCAAATCAACCTTTGTCCAGTGATCTTACC  
 TCCGAAATTGAAGGGTTGTATAAGCAGCTCAAATTCGACGACAGTAATGATGATCCGACCAC  
 GACACCTCCTGCAGAATCGCAAGATATATTTAGGCTCAAAGGTAAATACCCAGTCGATAAAG  
 AAAACGAAGGAGAGCAAAAAAATGGATCCAGCAATAAAGATGAGAACGAATCTACTTTCAAG  
 TTTATTTTTGTTTGCCAATAAAACAACTGCATTTTTACTATCGGATTTAGATGGAGGAAAACCT  
 GCAATTAGCCTTTCTAAGGTCTAATCTGGCTCAATCCTTACCGATTAATGCTACAATGATTA  
 CAAGATCATACAAATATTCATCCTCCGCAACTACTAAACAGACATCCACATCTTTTAAAGGCA  
 GCAAAAACGCCTCAAACGGAAAGTAGCAGATGGTAGTAACAGTTCCAAATCGAGGAGCATTGA  
 AACAAAGTTAGAAAAGAAAGTTTCAAACCTCTTCAATTTATCGGACTTTTTTACAGTTGTTCA  
 ATGGTAATGCTAGTAAAGATCAAGATGATGCACAGAGCTTGAAAAGCAAATGGAAAACAGAC  
 TATAACAATGCAGATAACAGTCAAGGCGCTAATGCTAGTAGCAAAATAGAAGATGGCAAAAA  
 TTCGGGCGCAAGCGATAGACAAATTAGAAGTAACAGAAGAGATGTGGATAACTTGATACTAT  
 GCGTTCACGGTATAGGTGAGACTTTGGGTAAAGATACGAATACGTAAATTTTCGCACACACG  
 GTAATCTACTTAGGTCTAATATGAAAAAATCTACAATAATTCTGAGAACTACAATCATT  
 AAACACAGCACCTGATTATAAAAGCAACTGTAACGTTCAAGTGCTACCCATCACCTGGAGGC  
 ACTCGATAAGTTTCAAACGGATGCTAAGGAGGAAAATATAGAAAATCCTGACCTACCGACT  
 TTGTCACAAGTCACAGTAAATGGAGTGTTACCCTTGAGGAAGCTACTGGCTGACGGTCTACT  
 AGATATTTTTGTTGTATGTCGAACCATACTACCAAGATATGATTCTACAACAAGTAACCTCTC  
 AATTGAACAAAACATATCGGATTTTTTAAAGAAATTAATCCAGAGTTTGATGGGAAAGTCCAT  
 TTAGTGGGCCATTCGTTGGGTAGTATGATATTTTGGATATCTATCCAAACAAAAAATA  
 TGAATTAGAATTTCAAGTAGACAACCTGTTCTTTATTGGCTCACCAATTGGATTGTTAAAGT  
 TAATTCAAAGAACAAAATTTGGTGACCGTCCCGAATTTCCCAATGACTTGAGAGAGAAAATTA  
 ACCGTACAGAGACCGCAATGTAAGGACATTTATAATGTTTACCACGTCTGTGATCCCATTTT  
 TTATAGGATGGAACCTCTTGTAGTAAAGAAATGGCTCATTACGAACAACTTATTTACCAC  
 ATTTGTAGTGAAGCTTATGGACTAACTTCTAAAGTTTTTGGAAATTTGGCGAAAACATATGGAAA  
 GATTTGCCAGGTACTGATGAAAATAATTTGCAGTCCAAAAAACTTCTCCAGAAAAAAGA  
 GGTCAAGTTATCAGAAAATCTTACGAGAATGCTTACAGGTTTGAATTACACCGGACGTCTAG  
 ATTTATGCTATGCTCCAAGTCTGCTAGAAGTGGATTTTATATCAGCTATAAAATCACATGTT  
 TCTTATTTTCAAGAACCAGATATTGCAGCGTTTATCCTAAAAGAAATTTTAAAGTAAACATGA  
 AAATGCATCAGAAATATATGTAAAAAGAAAGACTGGTTGA

>YLR259C 0.78 Cold

ATGTTGAGATCATCCGTTGTTGCGTAGTCGCGCTACTTTAAGGCCTTTATTGCGTCTGCTTA  
 CTCTCTCATAAAGAATTGAAATTCGGTGTAGAAGGAAGAGCCTCCCTCTTAAGGGTGTG  
 AAACTTTAGCTGAAGCGGTTGCTGCTACTTTGGGTCCAAAGGGTAGAAACGTTTTAATCGAA  
 CAGCCTTTCCGGTCTCCAAAGATTAATAAGGATGGTGTACAGTTGCCAAATCTATTGTGTT  
 GAAGGACAAGTTTGAATAATGGGTGCCAAGTTACTACAAGAAGTTGCCCTCCAAAACCAATG  
 AGGCTGCTGGTGACGGTACTACTTCTGCTACTGTCTTAGGTAGAGCCATCTTACAGAAATCC  
 GTCAAAATGTGCGCCGCTGGTTGTAACCTATGGATTTGAGAAGGGGTCTCAAGTTGCAGT

TGAAAAGTGAATTGATTTTTGAGCGCCAACAAGAAAGAAATTACCACATCTGAGGAAATTG  
 CTCAAGTAGCAACCATTTCTGCCAATGGGGACTCTCATGTTGGTAAGTTACTAGCTTCAGCT  
 ATGGAAAAGGTTGGAAAAGAAGGTGTCATCACTATCAGAGAAGGTAGAACATTGGAAGATGA  
 ACTTGAGGTTACTGAAGGTATGAGGTTTGTATCGTGGTTTTATTTCTCCATACTTCATCACTG  
 ATCCAAAGTTCGAGCAAGGTGGAATTTGAAAAGCCATTGCTATTGTTGAGTGAAGAAGAAATT  
 TCTTCCATTCAAGATATCTTGCCAGCTTTGGAAATTTCCAATCAAAGCAGAAGACCTTTGTT  
 GATCATTGCTGAAGATGTTGACGGTGAAGCTCTTGCGGCTTGTATTTTGAACAAGTTGAGGG  
 GTCAAGTTAAGGTTTGTGCTGTGAAGGCGCCTGGTTTTCGGTGATAATAGAAAAGAAACAATT  
 GGTGATATTGCAGTCTTGACGGGCGGTACTGTTTTTACTGAGGAGTTGGATTTGAAACCAGA  
 ACAATGTACCATAGAAAACCTGGGTTCTTGTGACTCTATTACCGTTACTAAGGAAGACACCG  
 TTATCCTGAACGGTAGTGGTCCAAAGGAAGCTATTCAAGAGAGAATTGAACAAATCAAAGGC  
 TCCATCGACATTACCACCACAAATTCATATGAGAAGGAGAACTGCAAGAGCGTTTGGCCAA  
 ATTTGTCGGGGGTGTTGCTGTCAATCAGGGTTCGGTGGTGCATCTGAAGTTGAAGTTGGTGAAA  
 AGAAGGACCGTTACGATGATGCTTTGAACGCTACCAGAGCTGCAGTTGAGGAAGGTATCTTG  
 CCAGGTGGTGGTACTGCCTTAGTGAAGGCATCTAGAGTTTTGGATGAAGTTGTTGTGACAA  
 TTTTCGATCAAAAAATTGGGTGTCGATATCATAAGAAAGGCCATTACAAGACCAGCCAAGCAGA  
 TCATTGAAAACGCTGGTGAAGAAGGTTTCAAGTTATCATCGGCAAATTGATTGATGAATATGGT  
 GATGATTTTTGCCAAGGTTTACGATGCCTCTAAGTCAGAATACACCGACATGTTAGCCACTGG  
 TATCATCGATCCATTTAAAGTGGTTAGATCCGGTTTTAGTTGATGCTTCTGGTGGTGCCTCAC  
 TATTAGCTACTACCGAAGTTGCTATTGTTGATGCCCCAGAACCACCAGCAGCTGCTGGCGCT  
 GGTGGTATGCCAGGTGGTATGCCAGGAATGCCAGGTATGATGTAA

>YFL034W 0.82 Cold

ATGTCGGATTTCGGAGGAAGATTTAGGTGTACAGTTGAAAAGGCTTGAAGATAGCGAGGCATTT  
 GAAGGAGTCAGGGGAGCATACTGATGAAGAATCCAACCTCAAGCCCCGAACATGATTGCGGCT  
 TGAGTAATCAAGATGATTTAACTGTTATGCATACACAGGCTAAAGAAGAAGTTTTTTAAACGA  
 AGAGAAGAAGACGGAACACGAACCGAAGATGCTTTACATGAGGGAGAAGCAGGAAAAGAGGG  
 CACAGGTTTTTCCCTCATCACAGTCAGTGTGCAGTCCATAATGAAGCAGATAGCGGTATTGATC  
 GGGCCGATAAAACCTATTTTTGCTGGACCCTTTTAAATCTGTGCACGATACGGATCCTGTTCCA  
 GGTACAAAGTCCAGGAGCAATTCAGACTCCGACTCTGATTCAGATGATGGAGGCTGGCAAGA  
 GATGCCCGCTGTCTCATCGTTCAATATATATAACCACAGAGGCGAACTAGAGTTGACTTCCA  
 AGGTTAGAAACTCAGAACAAGCCTCTGAGACGTCTCCACAGTTCCTCCAGGAAAAAATTGC  
 AAAAGTGTCAATGATTCTAGATTTGACTATACGAAAATGGCCGCTGAGCAGCAAGCCCAACG  
 ATCCTATCGAACAAATAAAAAACAGATTTCTTTTTTGACCACAAAGTACTGAAAAAGAAAA  
 TTAACAGTTTCGCAAACCTCCGTAATTTGACTTCTTCCCTTCGACTACATCCTTGAACAAT  
 GAAAAAATAATGATGACGATGATGATGATTTCTTATGACGAATATGAGGACGACGTGGAACC  
 AGTGAACGACTTGAATCGGGACTCGCAGTTAAACATAACGAAAATCTGCTATCTGATATGG  
 AGAAGTTTGCCTACGTAGGTGCAATAAACATTTTGGCAAATCAAATGTGCACGAATTTGGCT  
 ACGCTGTGTCTTTGTATTGACATTAATCCACAAAGAACCTAGCACATAGATTACAGTTTAC  
 CCAGAAGGATATGGCTGCTTGGAAAACCTGTGGTTTTATCACGGCTATATGATCATTGTTGGGA  
 TATCTCAAGAAGAAATTGTTATGATTGAGAAGCTTTCTCTGCACAAAATCCAATTGGAAGAT  
 TTGTGTAAATGTTTGAAAACCACTCAGAGCATTGATAATCCATGGGAGAATGATAGAGACCA  
 CGAAGAAGACGGTATAGAGGAAACTACGGAACGAATGAGTCCAAATGAACAAAATGGCTCAG  
 TACAGGCTAGTACTCCCAGCCAGAACAATCCGCAACACCTGAAACACCAAAGGCTAAACAA  
 TCACCGTTATCTTCGGACGTTCCAGGAAAAGTACTCGATCCGGAAAATGTCAAAGCCAAGA  
 CAAATTAATATAGATGTGGCGTGGACCATTATATGTGATCTTTTCCCTAATATGCTTGAAT  
 CCTCCACCTATGATTCGAGGTCAAGGACTTTGTTGATAAAATTTTGCCAAAGTCTTGAATATG  
 ACTAGCTTGGAAATTTGTGAATTTGAAAGACGAGTAACAGATTCTTACAGATGGAACAATC  
 TACAGAAGATCAAGTATGGGATGAACAAGATCACATGAGAAAATAGACGGAGAAGCAAAAAGAA  
 GAAAGAAAATGGCATATGTGCGCACTTGCATGGTAGGTGGTCTTTTGGTCTTGGACTAAGT  
 GGTGGTTTTACTAGCCCCGTCATTTGGCGGGGGATTGCTGCTGGTTTTGTCAACAATAGGTAT  
 TACTGGTGTACAAGTTTCTTGACCGGAGTGGGTGGTACCCTGTTGTTGCCGTTTCAAGTA  
 CTGCTATTGGTGCCAACATCGGTGCTAGAGGTATGTCAAAAAGGATGGGAAGTGTGAGAAT  
 TTTGAGTTCAGGCCACTGCATAATAATAGAAGGGTTAATCTAATCCTAACAGTGTGAGGCTG  
 GATGGTTGGTAACGAAGATGATGTTAGATTGCCATTTTCTACGGTGGACCCTGTTGAAGGTG  
 ACCTGTAATCGTTATATTGGGAGCCCCGAAATGCTAAAGTCTATTGGTCAAACGGTCAAGTAT  
 GTAGCTACCGAAAATTTTTACCACCTCGCTTCAACAAATTTTGGGTGCCACTGTTTTAACAGC

CTTGATCAGTTCTATCCAATGGCCGATGGCTTTATCGAAATTGGGTTATATTTTAGATAATC  
 CGTGGAATGTTTCTTTGGACAGAGCTTGGTCTGCAGGCAAAATTCCTTGCTGACACCCTAATT  
 GCAAGAAATTTAGGTGCCCGCCCATTACACTGGTTGGCTTCTCAATAGGTGCGAGGGTCAT  
 TTTTCTTGTTAATCGAATTGTGCAAGAAAAAGGCTCTAGGTTTGATTGAAAACGTTTATC  
 TATTCGGTACACCAGCTGTCATGAAAAAGGAGCAACTAGTCATGGCAAGATCTGTAGTTAGT  
 GGGAGGTTTGTAATGGTTATTCGGATAAAGATTGGTTTTTAGCATATTTATTTAGAGCTGC  
 TGCTGGTGGATTTAGTGCTGTTATGGGTATTTCTACGATAGAAAACGTTGAAGGTATCGAGA  
 ATATTAATTGCACTGAATTTGTTGATGGTCATTTGAATTATCGTAAAAGCATGCCTAAGTTA  
 TTA AAAAGAATTGGTATTGCTGTTTTAAGTGAGGAGTTTGTGCGAGATAGAGGAGATGATGAA  
 CCCAGAAGAAGTGAAAAGAAAAAGGAAATTAATAAATGATGTCGATGCAGCCCAAAAAAAC  
 TAAGTGAAAGAAAAAGCATAACAGTTGGGTGCCGAAGTGGTTGAAACCGAAGAAATCCAAA  
 TGAAGGTCATGGTCAAGAAGCTGTCGAAGAAGGAAGAGATATGCAAGACCTACCAGAAAA  
 TGACGTCAATAACAATGAAAACGAAAATCCAGATGAACATGAAGGGATAGCAAGGCAAAAAAC  
 GCAGAGATGCTGCTCTTGTGATCATGGGGCATTAATGCATGAGTTACAACCTATAAAAAACAA  
 GCGATGCACGAAGACGAAATAAAGAATAAAGCATGCCTTCCAGGAGAAGACAAGGAAGTGGAA  
 ATCATCAAACGACTTCTTGGGGGAGTCGCATTACAAACCACCGTCAACACCAAAAAATTAATC  
 CACCACAAAGCCCTAATAACTTCCAATTGTTAAGTGCTGGGAGAACTATTCTTCCAGAGGAT  
 GATGATTTGACCCTCGAGGAAAAAAAAGGTTGAATTCCTTTCCAGATGATATCTAG

>YLR152C 0.75 Cold

ATGTCCTTTTCTCTGGGTGCCGCTATTTACATTCGATTTAAAACCTATATTTAAAATTTACAC  
 CATTATGCTTGTGGCTATTTGGTAGCTAAGTTCGATATTGTTTTCCATGGAAAATGCGAAAG  
 GTATATCAAATATGGTTGTTAACGCTATTTTGCCTTGTGTTGACCTTCAACAAAATTTGTGTCC  
 AATATTTTCATGGAGGGATATAAAGGAGATTGGAGTGATAATACTTTTCAGCTTTTATCTTGTT  
 TGTTTTAGGTGCCACGGGCGCTTATTTACTACATTTGCTACGACTGTGCCCAAAAAATCT  
 TCTGGGGGCTCATATTTGCGGGTTTTCTTTCCAAATATATCAGATTTACCTATTGCCTATATT  
 CAGAGCATGGGTAACGGCTCCATTTTTACTGCTGAAGAAGCTGATAAAGGTGTTGCTTATTC  
 CTGCATTTTTTTATTTATTCAAAGTTTCCCTAATGATGAATTTTGAATGTGGAGAGTGGTCG  
 GACTTGATTTTAGAGATACAAAAGAACCAGATAGTGAGAATATTACTCCGTGAGTAAGTCCC  
 GCTATCGACGATCGCAAACCTACTGAAATAACAAAGTTACCTAATATCACACGTCCTACAAA  
 TGCCATCAATCGGAAGATGCGAGAAGTAATAGCGATTTGTCTTGTAACCTCTATTACTACAA  
 ATGAAATGACACCGCAGGCATTTCTACGAAGTTTTTACTGGCTACATCAAACCTATAAAGAA  
 TCAAATGGTGCATCCATAAATTTGAAAGTGACCTTCCGCATGCTGAAATATATAGGGTTTT  
 CTCGACTTATTCAAGCCAGGCGCATTGGAGTTCTCGGAATAGATGGCAGTTCCCTCTCAT  
 ATAGTCGTATATCAAAAAATAGCGATGGCAGAAGTTATAGAAGAAAAAGGAAAGCGGATATG  
 AATGAGTTGATTTCAAATACAGTGCCGCGCAAAAAATAAGGCAAGGTGAATTAGATTTATC  
 AAGACCACTATCCTTGACTGAAGAAGTTGGAAGCAGGAACGCAAGTATTGGTAATGTGCACA  
 CTGGTTATACCGATGAAAGTTCCATCGAAGAAGAAAATTGCCTAATATGGCCACCGACGGG  
 AGGGGTAGCCTCTCCTTCTTTATAGAGAGACACAATCTCAAATGGTTGCAGTACTTTATTAT  
 AAATTGCCCTCAGGCCAGCATCTCTGGGGCAATACTAGGAATAATATGTGCATTAATTCCT  
 GGGTTAAAGCATGCTTCGTAACGACATATGTTACGTTTACATAAGGCGCCTGATGGAGAACCT  
 GTTCTGAATTTTTAATGGATTTTACAGAGTATATTGGAAATGCATGTGTTCCATTGGGGCT  
 TCTATTACTTGGCGGAACGTTGGCAAGATTAGAAATTAAGTCATTGCCACCTGGATTTATTA  
 AATCCGCCTTATTGATGACATGCTTTCGATTAATTGTTCATTCTTATTATTGGCGTCCATATG  
 GTAAATAAACTATATTCGATCGATTGGCTGGATACGGGCATAGGAAAATTTGACATGATATT  
 AACGTGGTCCATGCCGAGTGCTACTGCTCAAGTATATTTACAGCATTTTATACGCCAGCAT  
 GTGGTGTATCATTCAAATGAACGTTTTGTCCGTCTTATTTGTTCATGCAGTATGCGATTCCT  
 TTCATCACTGTGGCGTTTGTGTTACATATACCTTAAAGGTCGATTTAAAAGTTTTGA

>YKL161C 0.76 Cold

ATGGCGACTGACACCGAGAGGTGATTTTTCCGTGCATTCGGCCAAGATTTTATCCTAAATAA  
 ACATTTTCATTTGACAGGTAAGATTGGTCGGGGCTCACACAGCCTTATTTGTTCTTCAACTT  
 ACACAGAATCGAACGAGGAAACTCACGTGGCTATCAGAAAAATACCAAACGCGTTTGGCAAT  
 AAATATCTTGCAAGAGAACTCTTCGTGAATTGAACTACTAAGACATTTAAGAGGGCACCC  
 AAATATAGTGTGGCTCTTCGATACTGATATAGTATTTTACCCTAATGGGGCACTAAATGGCG  
 TTTATTTATATGAAGAACTAATGGAATGTGACCTTTCTCAAATTTATAAGGTCGGAACAACGC  
 CTGGAAGACGCACACTTTCAAAGCTTCATATATCAGATACTGTGTGCTCTGAAATACATACA

TTCTGCTAATGTTTTACATTGTGACCTGAAACCAAAAACTTACTTGTTAATAGTGATTGCC  
 AACTAAAAATTTGTAATTTTGGGCTATCGTGTAGTTATTCAGAAAACCACAAGGTTAACGAC  
 GGCTTCATTAAGGGTTATATAACCTCGATATGGTATAAAGCACCAGAAATTTTGCTGAATTA  
 TCAAGAATGCACAAAAGCTGTGATATTTGGTCAACAGGCTGTATCTTGGCCGAACTACTTG  
 GTAGGAAACCAATGTTTTGAAGGGAAGGATTATGTAGATCATTTGAATCATATTCTACAAATA  
 CTTGGAACACCACCTGAGGAAACATTGCAGGAAATTGCCCTCAAAAAGGTGTATAATTATAT  
 CTTTCAGTTCGGTAATATCCCAGGAAGATCGTTTGAAGCATACTACCTGGTGCTAATCCAG  
 AAGCGCTTGAATTGCTAAAGAAAATGCTAGAATTTGATCCTAAAAAAGGATTACTGTAGAG  
 GATGCACTAGAGCATCCATATTTGTCAATGTGGCATGATATAGATGAGGAATTCTCATGTCA  
 AAAGACCTTTAGATTCGAATTCGAGCATATCGAAAGTATGGCGGAATTAGGAAACGAAGTTA  
 TAAAGGAAGTATTTGATTTGAGGAAAGTTGTTAGAAAACATCCTATTAGCGGTGATTCCCA  
 TCATCATCACTATCTTTAGAGGATGCCATTCTCAAGAAGTTGTACAGGTCCATCCTTCTAG  
 GAAAGTTTTACCCAGTTATAGTCTGAATTTTCTATGTAAGCCAACCTCCATCACTAACTA  
 CAACCAGCCATATCAAAACCTTATGGGAATAAGCTCTAATTCATTTTCAGGGTGTAACTAA

>YMR210W 0.8 Cold

ATGCGTCTAAAAGAATTGTTACCTAATTTTTTTGATTGTTTCATCAAGAGGTCCCTGAGGATCC  
 TATTGCATTCAAGTCCACCGATAAACGAGAGAATGAAAAATAAGAGATCACCATCCCTGAGC  
 TAATAGATACTAAAGTTCTGAATTAGCTGACGGTGTACTGACACTTTATATGGTTTACTG  
 GTCAATGGCCATTTACAACTGCATATGGTTCCTTTAGACACTTTGACAATATATACAAAGT  
 TCAATATAAAAAGATGATAATCAAATACCCACATGGGGGAGAAGGGACTGTGGATTTTGCTG  
 TAAATGGTAGAAGTACCAAAAAGAAAAGTGGAAAAAGAATACGTGCCGACAAGTCAACCG  
 GTATTTAACGGAACTTGAACGAAGATATTCGTACTATTCCCCTGATGATCCTAAATTGAA  
 CTCAGACGATGCTAAGCCTATGCTTATTATTCTCCATGGATTAACAGGGGGTTCGAGGGAAA  
 GCTACGTGAGGGCAATTGTTTCATGAAATCACCACGAAGTATGACTTTGAAGCATGCGTGT  
 AATGCTAGAGGATGTTGTTATTCTGCAATTACAACGCCGCTATTATACAACGGTGGTTGGAC  
 CAATGATATAAGATATTGTGTTAATGACTTGAGGAAAAGATTTCCGAATAGAAAGTTTTATA  
 TGATGGGATTTTCGTTAGGCGCATCTATAATGACAAATTACTTGGGAGAAGAGTCAGATCGT  
 ACTAAAATCGAATGTGCTATTTCCGTGAGTAATCCATTTGACCTGTACAACCTCTGCATATTT  
 TATTAACAGTACACCAATGGGGTCACGATTTTATTACCTGCTTTGGGTCACAACCTACTAC  
 GCATGGTTCGAAACCATCTCTCTACTCTGGAAGAAAACCTGATTTCAAAGATGTTATCGAG  
 AAGCATTTAAAAAGATTTCGCACGTGTGAGGCAATTTGATAACTTGTGACAGGCCAATGTT  
 TGGATATAAAAATGCAGAGGAGTATTACAAGAATGCTTCATCATATAAAAAGAATACCCGGGA  
 TCAGAACTCCTTTTATAGCTTTGCATGCTCAGGATGACCCAATTGTCGGAGGTGATCTTCCT  
 ATAGACCAATAAAAATCCAATCCATACACTTTGCTTCTAGAACTTCGACGGGGGGGCATGT  
 TGGATGGTTCAAAGACAGATCCGGCAGAAGGTGGTACGCAGAACCCTTATGCAGATTTTTGA  
 AAATATTTACGACGAAATTACTGTAAAGGGCTTAAAACCTGACTTGGAAAATGTTCAACTC  
 CCAGATCCTAATTGCGAACCCTAGCCACAACCTTTTCGCGCAATTAG

>YGR129W 0.8 Cold

ATGGATTTTTTACAAATTAGACGAGAAGCTGAAGGAGTTGAAAAGGAAAAGAGTAGATGTATC  
 TATAAAGAGTAGGAAGTTGGCTGACAGAGAGATTTCAGGAAGTAAGCGCAAATCGAAAACCA  
 GAGTATACAGTATGGAAGACGTAAATGATGCAGATGAATCAGTAGGAGATACAGAAAAGTCC  
 GAAAAAGAGAAAGCATTTCATTACACTGTCCAAGAATATGATGCGTGGGAACGTAGGCATCC  
 TCAAGGGAAGACTGGGCAAAGCCAAAGAGGTGGAATTTCTTATGATCAACTTGCAAAAATGA  
 GTTATGAGAAGACCTTGCAGAAATCTCGCTACGCAAAACACAGAATTCGAGCAAACAGGATAGT  
 TCCGCCGATGAAGAAGACAATAAAAACGTACCCAAGAAGGGTAGAATCGGCAAGGTACAGAA  
 GGACACTAAGACGGGTAAGATAACAATTCAGATGACGACAAGCTAGTTAATAAGTTGGCCG  
 TTTCTTTGCAATCTGAGTCGAAAAAAGATACGAAGCAAGAAAAAGACAAATGCAAAAATGCA  
 AAAACACTGTATGGGGTTGAAAGCTTCATTAATGACAAAAATAAACAATTCATGAAAAATT  
 GAGCAGGGAATCAAAGGATCAGAATAA

>YOR311C 0.81 Cold

ATGGGGACCGAAGATGCCATTGCCCTTCCAAATAGCACGCTAGAGCCGCGTACCGAAGCTAA  
 GCAAAGACTATCATCTAAGAGTCATCAAGTCTCGGCGAAAGTAACGATTCAGCAAAAAGAA  
 AAATTAGTAGTAGCGATGACGATGCACACGTTCCAGTGACAGAAATACATTTGAAATCTCAT  
 GAATGGTTCGGCGATTTTATAACTAAACATGAAATTTCCCGTAAGGTGTTCCATTCTTCCAT

TGGCTTTATTACTTTGTACCTGTATACGCAGGGTATTAATTATAAAAAATGTTTTATGGCCTT  
 TGATATACGCCTTCATCATATTGTTTTATTTGGATCTGATAAGACTAAACTGGCCCTTTTTTC  
 AATATGCTTTACTGTAGAACTGTGGGTGCGCTAATGAGAAAAAGGAGATTCATACATACAA  
 TGGGGTATTGTGGTACATTCTTGGGTTAATCTTTTCTTTTAACTTTTTCTCTAAAGATGTTA  
 CCTTAATATCGTTATTTTTGCTAAGTTGGTCCGATACAGCCGCCGCAACTATTGGAAGAAAG  
 TATGGTCATTTAACACCCAAAGTGGCAAGAAATAAATCCCTTGCAGGTTCGATAGCTGCGTT  
 TACAGTTGGTGTATCACCTGCTGGGTATTTTATGGCTATTTTGTTCCTGCCTACAGCTACG  
 TCAACAAACCTGGCGAGATCCAATGGAGCCAGAAACAAGCAGATTAAGTTTGAATATGCTA  
 TCCTTGTTAGGTGGTGTGGTAGCTGCTTTGAGTGAAGGTATAGATTTGTTCAACTGGGATGA  
 TAATTTCACTATTCCTGTCCTGTCATCACTTTTTATGAACGCAGTAATCAAACATTCAAGA  
 AATAA

>YJL203W 0.69 Cold

ATGGAACCAGAAGATACCCAGCTGAAAGAGGACATTAACCACAGTAAATTACATAAAGCA  
 GCATGGTGTGAGTTTGAGAACAACTGCTAGAAGATGAGAGATTCTCATTCATCAAGAAAG  
 ATGACCCACTCCATGAATACTACCCAACTCATGAATGAGCCAACAGACACTGTCAGCGGT  
 GAAGATAATGACAGAAAGAGTGAGCGAGAGATAGCAAGGCCGCCGATTTTCTGTTCTCTCA  
 ATATGATACTGGAATATCCCGAAGAGACATGGAAGTAATCAAATTGACAGCAGCTACTATG  
 CAAAGGATAAAAAGTATTGTTGAACAGATGATTTCAAAGGATGGTGAAGCCAGATTAACCTTT  
 ATGAACAGCTCACATCCGCTACATAAGACATTCAGTATTTGTGCGCCAGTACAAGCGAGT  
 ATATTCTTTTACTGGTCAAGAAATCAAGAAAAGTAAGAGAACCATTTTAGATAATTGTTTTG  
 AGAGAACACAGTATTGGGAATTTGAGAAAAGATAAAGACCCGGAACATGATAAGCTCGTAGAG  
 TTGTGCAAAAATACAATTTGCAGCCATTCCATGGGATAAAATTTACTCAAGTGGCAAAAATTTTC  
 TATCCCTGAAGACACAGAAATCTTCGAAGGCTCTCTAGATTTAGAACAGATGAGGCTGCGAA  
 GAGTACAACTGGTATTAAGTTATTTCGATAGTATCAAGCCGACAAATGAAGAAGAAAAAGATA  
 GTATCCGACCAAGGTAAGCAAAAAGGAGGAGATAGTAAGGGCAAAAAGCGTAAAATTAGAGC  
 TGTGGGAGAGACAAGGTTAAAGAAAAGTAAAAAATAA

>YGR011W 0.79 Cold

ATGTTAGGTCCCTTCTTGCTTTCCCATGATATCATGTATGAACACAGAAGAAATATCCTTATT  
 ATCAAACAACCTTATTTACAATGATATTTCCCTACGAAAGTGCAGGCTTTTCATCAGACGTGG  
 AATGTCAGTTCAATATCTTCTTCCAACTCTGTCATCCGTTACATCCAAGAGTATAATCTAT  
 ACATTAATCAAAGTGAACCGGTCAAGCAGGCTTTGGATAGCAAAGAGTGAGTTTATTACAAC  
 TCTGATACTGCAGCAGTTCAAATTTACCACTTTCCCTTCAAGGTGCATAGAAAAAAGTTTC  
 CTGGATGCACGATTTAA

>YHR112C 0.74 Cold

ATGGTGGACTTGTCAACAGCTTTGATTTCATGGCGATGATAAAGATAACAGGGTTACTGACGT  
 GGCGCCCCAATTAATGTCTCTACAACCTTCCGTTACGACGATGACGACCTAATTCCATGGA  
 CAGAGCGTGAAAACCTTGACTTTATGGAGAAGAAGCCCGTATATTCACGCTAGCGCATCCA  
 AATAGCACCAGATTAGAGAGTATCTTCTCAGAGATCCTCGATGGTTATGCTGTCATTTATTC  
 TTCAGGGTTAGCTGCGTTCTATGCGGCAATGGTACATTACAACCCTAAGAAGATCTTTATCG  
 GACAGAGCTACCATGGTGTTCGAGCAATTGCTAACATATGACCCGTAATTACGGCATTGAG  
 CAACACCCCTTGAAGATATTGAAAAATGTGCTTCTGAAGGTGACATTGTCCATCTGGAATC  
 TCCTGTAAACCCATATGGTACCTCTTCTGATATCGAGAGTTTGGCCCGCAGAGCTCATGCAA  
 AAGGCGCCCTGCTTATAGTGGATTCCACATTCGCATCTCCTCCATTGCAATACGCATGGAAT  
 TTCGGAGCCGATATTGTCTATACTCTGCTACTAAGTACTTTGGTGGTCATTCTGACTTGTT  
 AAGTGGCGTCCCTGTAGTCAAAGAGGAAGCAACTTCCCGACAATAAAGACGACAGAATCT  
 ACTTGGGTACAAACGTGGCAAATTTGGAAAGTTTCATGTTGTTGCGATCCCTGAGAACCCTAC  
 GAAATGAGAATAACCAACAATCAGAAAATGCTACGAAATTAGTTAGATTTTTGTGATGATCA  
 CCAATCTGAATTTGACAAAGTATTGAAGACGATTTACCACCTTCTTTACAAACAGAAGAGT  
 TCGTTAAAAGCAACTGGTAGGAGGATATGGTCCCCTTTTGTCTATCACTTTGTACACCAA  
 GAGCAGTGTAACAATTACCCCTCAAGCTGAAATATTTCCATCATGCGACCTCACTGGGTGG  
 AATTGAATCCCTTGTGGAATGGAGAGCAATGACTGACCCATATATCGACCAAACCTTAATAA  
 GAGTATCTGTGGCTGTGAATCCGCTAATGATTTGATTAAGGATTTGGCTTCGGCCTTGAA  
 GAATTGCAGGATGCAGCCTGA

>YGL099W 0.81 Cold

ATGCCACCAAAAAGAAGCTCCCAAGAAATGGAAGGCGCCAAAAGGGCCAAAACCTACCCACCG  
TAAAAATAAAAAATAAGCTTGAATTAGGCAGAGCTATTAATATGCACGTCAAAAGAAAATG  
CCATCGAGTATTTACCTGATGGTGAATGAGGTTCACTACCGATAAGCATGAGGCCAACTGG  
GTTAAATTAAGATCTGTAACCTCAAGAATCAGCTTTAGATGAATTCCTGAGTACAGCTGCACT  
GGCAGACAAAGATTTACGGCCGATAGACATTCAAATGTTAAAATTATTAGAATGGATAGCG  
GTAATGATTCTGCGACATCTCAAGGGTTTTCTATGACTAATGAGCAGCGTGGAATCTTAAT  
GCGAAGCAAAGAGCGCTTGCTAAGGATTTGATTGTTCCAAGGAGGCCTGAATGGAACGAGGG  
CATGTCCAAGTTTCAGCTTGATAGGCAAGAAAAGGAAGCGTTTTTTAGAAATGGAGAAGAAAAT  
TGGCACATTTACAAGAAAGCAATGAAGACTTGTGTTAACACCGTTTTGAAAGAAAATATCGAA  
GTTTGGAACAGTTATGGAGAGTTGTTGAAAGATCAGATTTAGTTGTTCAAATTGTAGATGC  
GAGGAATCCGTTGCTGTTTAGATCTGTGATTTAGAAAAGATATGTAAAAGAGTCAGATGACA  
GAAAAGCAAACCTTACTGCTAGTTAATAAAGCAGATTTATTGACCAAAAAGCAACGTATCGCT  
TGGGCAAAGTACTTTATCTCCAAGAATATTTTCGTTACGTTTTACTCTGCATTGAGAGCTAA  
TCAATTATTGGAGAAACAAAAGGAAATGGGGGAAGATTATAGAGAACAAGATTTTCGAGGAAG  
CTGATAAAGAAGGGTTCGATGCTGATGAAAAAGTTATGGAAAAAGTTAAAATTCTGTCCATT  
GACCAACTGGAAGAATTGTTTTTATCAAAAAGCTCCAAACGAGCCTTTATTGCCACCTCTGCC  
CGGTCAACCTCCACTGATTAATATTGGTTTTGGTTGGTTATCCAAATGTAGGTAAATCCTCCA  
CTATTAATTTCGCTCGTGGGTGCCAAGAAAGTTTCTGTTTCATCCACGCCTGGTAAAAACAAA  
CACTTCCAAACTATTAAGTTATCTGATTCTGTGATGCTTTGTGACTGTCCCGGTCTTGTCTT  
CCCAAACCTTTCATATAACAAGGGTGAGCTCGTGTGTAATGGTGTTTTTACCTATTGATCAAT  
TACGTGATTATATTGGTCCAGCAGGTTTAGTAGCAGAAAAGAAATACCAAAGTATTACATTGAA  
GCGATTTATGGTATCCATATTCAAACCAAATCAAGGGATGAAGGTGGGAATGGGGATATACC  
AACTGCTCAAGAAATGTTAGTCGCATACGCCAGAGCTCGTGGTTATATGACTCAAGGTTACG  
GTTCTGCTGATGAACCAAGAGCAAGTCGTTATATATTGAAAGATTACGTCAATGGGAAATTA  
CTGTATGTCAACCTCCGCCCATCTAGAGGATGATACACCTTACACTAGAGAAGAGTGTGA  
AGAATTTAACAAAGATTTATATGTGTTTCGACAGATTACCGGACACCAGAAAGGAGCAAGTGC  
AAAATGCTGCTAAGGCTAAAGGCATTGATATCGTGGATTTAGCTCGTGATTTGAATCAGCTA  
ACGTTTTTCAGCTCACACTGGTGGTGACACACAAAAGAAGCCAAATCTGTTACGCACGGTGG  
TAAACAAGCTGCATTTGTACAATGCCGCTGAGGACTTGGATAGAGACTTCTTCAAGATGAACA  
ACGTCGAAGGTAGATTAAGTACACCATTCACAAAGTTCAAATAGTTTCAGCTGGTAAGAGA  
CATAACAAAAAAACAAAAGTAAAATGCGAAAAGCAAAGTTTTTTAGCATTGAAAATAATTA  
G

>YNL227C 0.75 Cold

ATGAAGACCTGCTACTATGAGCTTTTTAGGGGTGCAAACGCATGCTTCTGATCTTGAGTTAAA  
AAAAGCTTACCGTAAAAGGCCCTACAATATCACCCAGATAAAAACCCAGATAATGTTGAAG  
AAGCCACACAAAAATTTGCTGTGATTCGAGCCGCTTATGAAGTACTGTCTGACCCCCAGGAA  
AGAGCATGGTATGACTCACATAAGGAACAAATTTTTAAATGATACTCCACCAAGCACTGATGA  
TTACTATGATTATGAGGTAGACGCTACAGTCACAGGTGTCACAACCTGATGAATTACTCTTAT  
TTTTTAACTCTGCTCTTTATACTAAAATAGACAACCTCAGCTGCTGGGATATATCAAATGCA  
GGAAAAATATTTGCCAAGTTAGCTAAAGATGAGATTTTAAAGTGGTAAGCGACTGGGGAAAT  
TTCCGAGTATCAAGATGATGTATTCGAACAGGATATTAATAGTATTGGCTATTTGAAAGCCT  
GCGATAACTTTATTAACAAGACGGATAAACTTTTATATCCTTTATTTGGATATTCGCCAACG  
GATTATGAATATTTGAAACATTTCTATAAGACTTGGTCAGCGTTCAATACCTTGAAAAGTTT  
TAGCTGGAAAGACGAGTACATGTACTCTAAAACCTATGACAGAAGAACCAAGAGGGAAAGTTA  
ATAGAAGAAATGAGAAGGCTAGGCAACAAGCTCGAAATGAATACAACAAAACCGTGAAAAGG  
TTTGTAGTTTTTCATAAAAAAGCTCGATAAAAAGAATGAAAGAAGGTGCAAAAATTGCAGAAGA  
ACAGCGTAAACTAAAAGAACAACAGAGGAAAAATGAGTTAAATAACAGAAGAAAGTTTGGGA  
ACGACAACAATGACGAAGAAAAATTTCAATTAACAAGCTGGCAAACGGTAAAAGAAGAAAAC  
TGGGATGAACTGAAAAGGTATATGATAATTTTGGAGAATTCGAAAATTCGAAGATGATAA  
GGAAGGTGAAGTATTGATTTACGAGTGTTTTATCTGCAACAAGACATTTAAGTCGGAAAAGC  
AATTGAAAACCCACATAAACACTAACTGCATAAGAAAAATATGGAAGAGATACGGAAAAGAA  
ATGGAAGAGGAAAACATAACGCTTGGGTTGGATAATCTCTCCGATCTCGAGAAATTTGATTC  
AGCAGATGAAAGTGTAAAGAAAAAGAAGATATTGATCTGCAAGCATTGCAAGCTGAACTCG  
CTGAAATTTGAAAGAAAACCTGGCAGAATCGTCTTCTGAAGACGAAAGTGAAGATGCAATCTC  
AACATAGAAATGGATATAGAGGTAGAAGACGTCAGTTCGGATGAAAATGTACATGTGAATAC

GAAGAATAAAAAGAAAAGAAAAAGAAAAAAGCAAAGGTTGACACAGAAACAGAGGAAT  
 CTGAATCGTTTCGATGATACTAAAGACAAACGGAGTAATGAGTTGGATGATCTTTTTGGCATCA  
 CTAGGAGACAAGGGCTTACAAACGGATGACGATGAAGATTGGTCTACTAAAGCGAAAAAGAA  
 AAAGGGCAAACAACCTAAAAAGAATTCTAAATCCACAAAAAGCACTCCGTCCTTGTGACTC  
 TACCGTCCTCTATGTCTCCAACCTCCGCGATCGAGGTGTGCACTACATGCGGAGAATCATTT  
 GATAGTCGAAATAAGCTATTCAACCACGTGAAGATAGCAGGGCATGCGGCAGTAAAAACGT  
 AGTGAAGAAGAAAAGTCAAGACCAAAGAATATAG

>YAR018C 0.79 Cold

ATGCATAGACGACAGTTTTTCCAAGAATACCGTAGTCCTCAGCAGCAGCAGGGACACCCACC  
 AAGGTCAGAATACCAAGTTCTCGAAGAAATTGGGAGAGGTTCAATTTGGGTCTGTACGAAAAG  
 TCATCCATATACCTACCAAGAACTTTTTGGTTAGAAAGGATATCAAATATGGCCATATGAAT  
 AGCAAAGAGAGACAACAGCTGATCGCTGAATGTAGCATTCTATCGCAGTTGAAGCATGAAAA  
 TATTGTAGAATTTTATAACTGGGACTTTCGATGAACAAAAAGAAGTGTATACCTTTATATGG  
 AATATTGTTCCAGGGGTGATTTATCCCAGATGATTAAGCACTACAAACAGGAGCATAAATAT  
 ATACCAGAAAAAATTGTGTGGGGTATCCTGGCCCAATTATTGACTGCGCTCTATAAATGTCA  
 TTATGGTGTGAAATTGCCAACTTTGACCACAATATATGACCGGATGAAACCACCGGTAAAAG  
 GCAAAAACATCGTTATCCATCGTGATCTGAAACCAGGAAATATATTCTTAAGCTATGATGAT  
 AGCGATTACAATATTAATGAACAAGTAGACGGTCACGAGGAAGTGAATAGTAATTATTACAG  
 AGACCATAGAGTGAATTCAGGGAAAAGGGGGAGCCCTATGGACTATAGTCAAGTTGTGGTAA  
 AGTTAGGTGATTTTGGGTTAGCCAAATCTCTGGAACTAGTATTCAATTTGCCACAACATAC  
 GTCGGTACACCATATTACATGTCGCCTGAAAGTGTGATGGACCAACCATACTCCCCACTATC  
 CGACATCTGGTCACTAGGTTGTGTTATTTTTGAGATGTGTTGTTGACACCCCATTTTCAGG  
 CAAAAAATTATCTCGAGCTACAACTAAGATTAAAAACGGGAAATGTGACACCGTCCCTGAG  
 TATTACTCTAGAGGGCTTAATGCCATAATACATTCAATGATAGATGTGAACTTAAGAACCAG  
 GCCTTCCACTTTTGAATTAAGTACTGCAAGATATTCAGATACGAACTGCAAGAAAGTCGTTGCAAT  
 TAGAGAGATTTGAAAGGAAGTTACTGGACTATGAAAATGAGCTGACAAACATTTGAAAAAATC  
 CTCGAGAAGCAAGCTATTGAATACGAAAGAGAAGTGAAGTCAAGTTGAAGGAACAATTTACCCA  
 GGCAGTGGAGGAGCGAGCCAGGGAAGTAATTAGCGGTAAGAAAGTTGGTAAGGTTCCAGAAT  
 CTATAAACGGATATTATGGTAAAAAATTTGCCAAACCTGCATACCCTGGCAAACAAGATAT  
 CGATAA

>YKR084C 0.79 Cold

ATGGCTTACAGTACTACAGCGATGGAGCAGACGACATGCCGGACTTTCACGACGAAGGTGA  
 ATTTGATGATTATTTGAATGACGATGAATATGATCTAATGAACGAGGTATTTCCCTACTCTAA  
 AGGCGCAGTTACAGGATTACCAAGGCTGGGATAATCTTTCACTTAAGCTAGCTTTGTTTGAC  
 AACAAATTTTCGATTTGGAAAGCACGCTGGCGGAATTGAAGAAAACCTTTGAAGAAGAAGAAGAC  
 ACCAAAGAAGCCAATTGCTGCTGCTAATGGGAGTGCGAATGTTACTCAAAAACCTGGCAAACA  
 TCTCAATTTTCGCAACAAAGGCCAAATGATCGGCTTCCAGACTGGCTTGACGAGGAAGAAAGT  
 GAGGGTGAACGCAATGGTGAGGAAGCCAATGATGAAAAGACAGTTCAAAGATACTATAAGAC  
 TACGGTGCCAACGAAACCAGAAACCTCATGATATTTCTGCATTTGTTAAATCTGCCTTAC  
 CTCACTTAAGTTTGTGTTCTTGGTTCATGTTGATGCGGGAAAATCAACTCTAATGGGCAGA  
 CTACTTTATGATCTGAACATTGTCAACCAATCCCAACTGAGAAAGCTACAAAGAGAGAGTGA  
 AACTATGGGTAAAGTCATCCTTCAAATTTGCATGGATTATGGATCAGACAAATGAAGAGCGCG  
 AACGTGGTGTAAACAGTGTCAATTTGTACATCGCATTCTCTACCCATAGGGCAAATTTTACT  
 ATTTGTGGATGCGCCAGGCCATAGAGATTTTGTCCAAACGCTATAATGGGGATATCACAAGC  
 AGATATGGCTATACTTTGTGTAGACTGTAGCACCATGCTTTTTCGAATCAGGATTTGACTTGG  
 ATGGGCAAACAAAGGAGCATATGCTACTGGCATCTAGTCTTGGAAATTCACAATCTGATTATT  
 GCTATGAATAAGATGGATAATGTTGACTGGTCCCAACAAAGGTTTGAAGAGATTAAATCGAA  
 ATTTGTTGCCATATCTGGTTGATATTGGGTTTTTTGAGGATAATATTAATTTGGGTACCTATCA  
 GTGGCTTTTCCGGAGAAGGTGTTATAAAAATGAATATACAGATGAAGTGAAGACAATGGTAC  
 AATGGTCCTAACTTAATGTCTACTTTGGAAAATGCGGGCTTCAAGATTTCAAAGGAGAAATGA  
 AGGAATTAACAAAGATGATCCGTTTTTGTGTTTCTGTGTTGGAGATCATCCATCGAAAAAAA  
 CAAGTAACGATTTAGCACTAGTTTCAGGAAAATTTGGAATCAGGTTCTATTCAACCTGGTGAA  
 TCTTTGACAATATATCCGTCGGAACAGAGTTGTATTGTGGATAAAAATTCAGGTTGGTTCTCA  
 ACAGGGCCAATCAACGAATCACGAAGAGACAGATGTTGCCATTAAGGGTGATTTTGTCACTT  
 TGAATTTGCGCAAAGCCTATCCAGAAGATATTCAAAATGGTGATTTGGCAGCATCAGTTGAT



TATTCGTCCATTCATTCAGCACAGTGTGTTTTGTTCTGGAATTGACCACCTTTGACATGAACCG  
 ACCTTTGCTGCCAGGAACACCGTTTTATTCTTTTCATCGGAGTCAAGGAGCAACCTGCTCGAA  
 TCAAAAGATTGATTTTATTTATAGACAAGGGCAATACTGCAAGCAAGAAAAAGATTAGACAT  
 CTAGGCTCTAAACAACGAGCATTTGTAGAAAATAGAATAATTGAAGTAAAGAGGTGGATTCC  
 TTTATTAAGTGCATGAAAATGACCGTTTTGGGAAGAGTTGTTCTTAGAAAGGACGGTAGAA  
 CCATTGCGGCAGGTAAAATATCCGAAATAACTCAGTAG

>YOR126C 0.8 Cold

ATGGATTACGAGAAGTTTCTGTTATTTGGGGATTCCATTACTGAATTTGCTTTTAATACTAG  
 GCCATTGAAGATGGCAAAGATCAGTATGCTCTTGAGCCGCATTAGTCAACGAATATACGA  
 GAAAAATGGATATTTCTTCAAAGAGGGTTCAAAGGGTACACTTCTAGATGGGCGTTGAAAATA  
 CTTCTGAGATTTTAAAGCATGAATCCAATATTGTCATGGCCACAATATTTTGGGTGCCAA  
 CGATGCATGCTCAGCAGGTCCCCAAAGTGTCCCCCTCCCCGAATTTATCGATAATATTCGTC  
 AAAATGGTATCTTTGATGAAGTCTTACCATATCCGTCCTATTATAATAGGACCGGGCTAGTA  
 GATAGAGAGAAGTGGGAAAAAGAAAAATCTGAAGAAATAGCTCTCGGATACTTCCGTACCAA  
 CGAGAACTTTGCCATTTATTCCGATGCCTTAGCAAACTAGCCAATGAGGAAAAAGTTCCCT  
 TCGTGGCTTTGAATAAGGCGTTTCAACAGGAAGGTGGTGTGCTTGGCAACAACCTGCTAACA  
 GATGGACTGCACTTTTCCGGAAAAGGGTACAAAATTTTTTCATGACGAATTATTGAAGGTCAT  
 TGAGACATTCTACCCCAATATCATCCCAAAAACATGCAGTACAACTGAAAGATTGGAGAG  
 ATGTGCTAGATGATGGATCTAACATAATGTCTTGA

>YKR085C 0.73 Cold

ATGATTGGCAGAGGTGTGTGCTGCAGATCGTTCCACACTGCTGGATCTGCCTGGAAGCAATT  
 TGGATTTCCCAAAACACAAGTGACAACGATTTACAACAAGACTAAGAGCGCATCTAACTATA  
 AAGGGTATTTAAAGCACAGAGATGCTCCAGGAATGTACTATCAACCATCAGAATCCATCGCA  
 ACCGGATCTGTTAACAGTGAGACCATTCCACGTAGCTTTATGGCAGCCAGTGACCCTCGTAG  
 AGGGCTTGACATGCCTGTTCAAAGCACTAAAGCGAAGCAGTGTCCAAATGTTCTCGTAGGTA  
 AGAGCACAGTGAACGGCAAAACCTATCATCTGGGACCTCAAGAAATTGATGAGATCCGGAAG  
 TTACGTCTTGACAATCCTCAAAAAGTATACACGCAAATTTTTGGCTGCAAAATATGGCATTTT  
 GCCATTATTTGTATCCATGGTCTCGAAACCTAGTGAACAACATGTACAAATTTATGGAAAAGTA  
 GATTGCAAGAAATCCAATCACGCTGGAAGGAGAAGAGGCGTATAGCCAGAGAGGACCGTAAG  
 CGTAGAAAACCTCCTGTGGTACCAGGCGTGA

>YLR130C 0.73 Cold

ATGGTTGATCTTATAGCGAGGGATGACTCCGTAGATACTTGCCAAGCTTCTAACGGCTACAA  
 TGGGCACGCAGGTCTTAGAATCTGGCAGTATTCATTATACTGATATCGTCAGGATTGGGAG  
 TTTATTTCCCAATTTTGTTCATCACGGTATTCGTTTTATAAGGCTACCAAATTTGGTGCTTTTTC  
 ATAGCGAAGTTCTTCGGTCTGTTGTATTGTTGCCACAGCGTTCGTTTCATCTTCTACAGCC  
 CGCAGCCGAAGCTCTGGGAGATGAATGTCTTGGTGGCACATTTGCCGAATATCCATGGGCTT  
 TTGGGATCTGTTAATGTGCTTTTTCTTACTTTTTCTTCACTGAAATCATCACGCATTATTTT  
 GTAGCGAAAACGCTGGGACACGATCATGGGACCATGGGGAAGTTACCAGTATTGATGTTGA  
 TGCTCCCAGTTCCGGATTTGTCATCAGAAAATATGGACTCGGATCCTGTATCTTTCAATAACG  
 AAGCTGCCTACTCCATCCATAATGACAAAACCTCCGTACACTACTAGAAATGAAGAGATTGTC  
 GCTACTCCTATAAAGGAAAAAGAACCCGGCTCAAATGTTACTAATTATGATCTGGAACCGGG  
 AAAACAGAGTCACTAGCTAATGAACTAGTTCCAACAGTTCATGCGACAAAATCTCGCTT  
 CTGTACCTGGAAAAGATCATTATTTCTCACGAAAATGACCATCAAGATGTCTCCCAGTTGGCC  
 ACACGTATCGAGGAGGAAGATAAAGAGCAGTATCTCAATCAGATACTAGCTGTTTTTATTCT  
 AGAATTTGGCATCATCTTTCACTCTGTATTTGTGGGTCTTTCGCTATCTGTGCGGGGTGAAG  
 AATTCGAAACCTTATTTATCGTTTTAACTTTCCACCAAATGTTTGAAGTTTGGGTCTAGGC  
 ACAAGAGTTGCCGAAACGAATGGCCAGAAAAGTAAGAAGTACATGCCTTGGTTAATGGGATT  
 AGCCTTCACTTTAACGTCACCCATAGCAGTCGCGGTAGGTATTGGTGTGACACTCTTGGGA  
 TACCTGGCTCTAGAAGAGCATTAATTGCTAATGGTGTTTTTGACTCGATATCATCAGGAATT  
 CTTATTTATACTGGACTAGTGAATTAATGGTTCATGAATCTTATACTCTAATCAATCAA  
 AGGACCTGATGGCTCAAAAAATGCTTAGTGCATATCTCATCATGTGTGTTGTGGAGCTGCTT  
 TAATGGCTCTTCTAGGGAATGGGCATAG

>YHR196W 0.79 Cold

ATGGGCTCCTCTTTGGATTTGGTGGCGAGCTTCTCGCATGATTCCACTCGTTTTGCATTCCA  
 AGCAAGCGTCGCACAAAAGAACAATGTGGATATTTATCCATTAATGAACTAAGGATTATG  
 TGGTCAATAGTTCATTAGTGAGTCATATTGACTATGAGACAAACGATATGAAGGTTTCAGAT  
 GTAATCTTCTTTGGGTGGTGTAGTGATTTGATAGATACGCAGTCATCCAATATCAAAAAGAAA  
 ATTAGATGAAGATGAAGGAACTGGTGAATCAAGTGAGCAAAGATGTGAAAACTTTTTCGTTA  
 ACGGATTTCTTGACGGAAGAATTGTTGTTTACTCTTCTAATGGTAAGGATATAGTTAATATC  
 ATCAAGAATAAAAAAGAGATTTTGGGAGCAGACACAGACGAGTCTGATATATGGATTTTGGGA  
 TAGTGATAAAGTCGTTAAGAAAATTACAGTATAACAATTCGAAACCTCTAAAGACTTTTACGC  
 TAGTTGATGGTAAAGATGACGAAATAGTTCAATTTCCAAATTTTGCACCAAAATGGCACTTTA  
 TTGGTATGCATTATTAATAACAGATGGTTTATATTGTTGATCCATCAAAGAGAAGACCCTC  
 TACTAAGTATAGTTTTGAAATATCAGACGCTGTAGCATGTGAATTTTCTTCAGACGGTAAGT  
 ATCTGTTAATTGCCAACAACGAAGAATTAATAGCTTACGACTTGAAGGAAGATTCAAAGCTG  
 ATCCAATCATGGCCTGTCCAAGTGAAGACATTGAAAACCTTAGATGATTTGATAATGGCCTT  
 GACTACTGATGGTAAAATTAATAATTATAAGATTGGCGAAGCCGACAAAAGTTTGTCTATAG  
 TTGTAATGAAGATTTGGAAAATTATAGATTTTACGCCAATAAACAGCAAGCAACAGGTTCTA  
 ATTTTCATGGCTAAATGTCAATGAACCCAACTTTGAATCTATTTCTTTAAAAGAAATTGAAAC  
 TCAGGGGTATATTACAATAAACAAAAATGAAAAAATAATGCTGATGAAGCGGACCAAAAAGA  
 AATTAGAAGAGAAAAGAAGAAGCTCAGCCTGAAGTTCAACATGAGAAGAAGGAGACTGAA  
 ACTAAGATAAAACAAGAAAGTTAGTAAATCAGATCAAGTTGAAATTGCTAATATTCTCTCATC  
 GCATTTAGAAGCTAATTC AACAGAAATATTGGATGATCTGATGTCTGGAAGTTGGACAGAAC  
 CAGAGATTAAAAAATTCATCTTAACCAAGATCAATACAGTAGATCATCTAAGTAAGATATTT  
 TTGACTATATCAAAGTCAATAACACAAAATCCATGGAATGAAGAAAATTTACTTCCGTTGTG  
 GCTTAAGTGGTTGCTGACTTTGAAAAGTGGGGAGTTAAATTTCTATAAAGGATAAACATACAA  
 AGAAAAATTGCAAGCATTTAAAATCTGCATTAAGATCTTCAGAGGAGATCTTGCCTGTTCTA  
 CTCGGTATACAAGGTAGATTAGAAATGTTGAGGAGGCAAGCAAAATTGAGAGAGGATCTTGC  
 ACAACTATCTATGCAAGAGGGTGAAGATGATGAAATAGAAGTTATAGAGCATTCAAATGTAA  
 TTAGTAATCCTTTGCAGGATCAAGCATCGCCTGTTGAAAAGCTTGAACCAGATTCAATTTGTT  
 TATGCAAATGGAGAAAGTGACGAATTTGTCGACGCATCGGAATACAAAGATTGA

>YNL226W 0.71 Cold

ATGCTCTTTTCTGGGGTTCAGACAGTACTTCATAAGCGGCTCGAATCACAGCAAATTTTTGT  
 GTGGCTTCTTCAACATTATCTGGGTTTTTATCTGGGTGATATTGTAGGGCCTTTTTACGGTA  
 AGCTTTTTTTTAACTCAAGATCAGAAGCATGCGTTTTCGACCCCTAAAAGCTCATAGTAGCAGG  
 TCTTCATCCGTTATTTTTGAAGTAGTAGGATATCACTATACTGATATTAACCTTTGGCTGGT  
 CAGACTTTTACTATGTAAAAAGAGCTACTTTGCGATGACTTCAAATTTTTTTTACGTTATATT  
 TTTTTTCTATTCTTAAAACAAGAAAAGTGTAACATAAAAATGTTGGCCGCTTAAGCCCTCC  
 AATTTTACAACAAATGAATATTTTATACATACTTCTAG

>YPL183C 0.8 Cold

ATGAAGGACTTGTCTCATTATGGTCTCGCTATGTGTTAAATTTTACAATGATTATGTTCT  
 AGCTGGTTATGGGCCTTTCATCCATGTCTATGACTATCATTCGGCTACGTTGATTAACAAAT  
 GTAGGCTATTTCACTACAATAAAGTTCATGGACTTAGCCTTCTAGTGAAGGGAAAATTTTG  
 GCCTATGGTGCAAGATCAGTAAACAATAGTGGAACCTTGAAGACGTTTTTAAAGAAAGAGTCATT  
 GGTGGATTTGCAAAGGATTAACCTCAGATTGGATTACC GGTTACATTTCAGCTTTGACAAC  
 TGCAAATATATTTGTTAACATGTTATAATAAAGTGCTAATTTGTGATTTAAATTTGTGAAGTT  
 CTTTTTAGGAAGTCTCTTGGGGGAGAAAGATCTATTCTATATTCCGGTATAATTAAGTTTT  
 CGGTCCGGATAAAGTATATGTTAACGCTGGTACTGTAATGGGCGGTGTTATCATTTTGGGACC  
 TGTCTCGGAGACAAAATTCATAACTTACTGGGTGATGAAGGTTCTATCTTTTATGTTAAT  
 TTAAGCAACAACGGAAGATATGTTGCCAGTTGCTCTGACGACAGATCAATTAGACTGTGGGA  
 TTTAGAACTGGCAAGCAGCTGTCTGTTGGCTGGAGCCATACGGCAAGAATATGGAATTTAA  
 TGTTTTTTGATAATGATTCAAACTAATAAGTGTCTTGAAGATTGCACATGCCGTGTATGG  
 AACATTATCGAATCACGAGAAAACGTTGCCGAATTATCCATATCTAACGTTTACGAAGTACA  
 TTTAATCAAGAGTATATGGGGCGTTGATGTGAAAGACGACGAAATGATAGCTGTAACCTCCG  
 GGAATGATGGTAGGTTAAAGCTGATTGATCTTCTTCAACTGAAGAGACACGGCGATGAAGAA  
 ACATCGTTCAGTCTAGATGATATCGCAAAGCAATGTGGCGATATTTTCGAAAAGAATGAAAG  
 TATCAAGGGATTTCAATGGTTTTTCAATTCGGTGTAATTGCTATCACTTCAATGGGTAATAAC  
 TTAATAACAGTGATGTCACGAAACAATGGAAGTTGTTACTAACAATGAAAATTCAACTCG

TATCCAATTACAAATGGGATTCAAACGCAAAATATCGCTGTCTTTTCCAATAATAAAAAGTGA  
CATCCTTCTTATCAAATTTAGCAAAGATAGCGCTGACATAATTGAGACCGAAGAATTCCATT  
TAGATGAGCTTTCTAAGACAAATAACTGTCTCGTTACAGAATACGATGATGACTCCTTCCTA  
TTGACTTTTACAATCCCCAAATCCTCGAGAGAAGTTTGTATGTTTGGAAATAAGCCTTCAGAA  
CTTAAAAATTTAAAAGCAAGCACTGTTTCAATAAGCCGAAAATTTTTCTTCCTCATGTTTGA  
CCTCCTTCCGAAATCATATTTTAGTCGGCTCACGTTTTAGTACATTAGTAATCTACAACCTA  
CTTGATGAGAGCGAGGAGCCCTTCATAATTAGGAGATTAAGTCCCGGAGACACTACAACCTC  
AATCGAATTTGTAGAAGATAAAGACAACCTCTGCGGTCTTCTCAGTAACAAATAGGGATGGCT  
ATTATGTATTTATTGAGTTGACGAAAAACAGTTTGGAAAGAGGGTCCCTACCGACTAAGTTAT  
AAGGTCTTGCATTTCTAATAAGATGATGAAAGGTTTCTTGGAGGGCGCTTCTTTAATTCAAA  
AGGTGAATACATTACTTATGGGTTCAAGTCCAGCTTGTTTTATCTCTACAATGAAACCAACT  
GTTATGAACTAGCTAGTGAAGTTTGTGGTGGTCCCATCGTCTGTGGAATCTCGCAAAAATT  
ACTGATGGCCACGTATTAATGTATATTAAGGCATCCCGATTTTCATTTAAGGAAAATTTACAA  
CTCCATTGTGCCTGAAACTTTAGAAAATGGTGTACACGGAAGGAAATCAGAGATATTTCAA  
TCTGTCTGTTTCAAATACCAACACGAATGACAATTTAAGGATGGGCATATATTCTGTACT  
GCATCTGAAGATACTACAATTAAGCTGGGATATTTAACAATAGAACAGGGAAGGTGCAGAA  
TTTTTGGACACAAAAGAAAGCATGTGTCTGGATTACAACGTTGTCAGTTTATAAATCACAAAC  
TAATGATATCATCTTCAGCTAGAGAGGAGTTATTCTTATGGGAATTGAACGATAAGTATAAT  
AAACGACCATATATGACCATACGACAAGCTTTACCTGTATCCACAAATAATTCTGATCTAAG  
GATCATGGATTTTGTATGTCAAAATTTATATCACAGTCAGGTGACTTCTTATTAGTTACTGTTT  
ATTCAGATTTCAACAATAAAGATTTGGCACTATAGGGAAAAATCAGAATAAGTTTGACCTGATC  
ATGCAAGGTGCTTATAAGACGTGCTGTTTATTCAACGTCGTATTTATTGCACCTGAAAAGAAGA  
GCTCCTTGTGTGTCATTTACCAACTGATGGACATTTAGTGGTTTATAATATAACCGAGTACG  
TACCATTTTCCGTTGATCCGATTTCTGGCGATTTGGTTGACCACAACTGGACGCTACTATC  
TCAAATCTTCCCGCACCTGTAGCGCAGTTGCCGGTACATCAATCTGGTGTCAAGTCCCTAGA  
CTATGTTGCTAATGCTACAAGAACTTCCGCCACAATTTTGACAGGGGGTGATGATAATGGTT  
TAGGGTTAAGCAACCTGAAATTAGATGACTCGAATAAAGTAACGTTAAAAACAAGTGACTTT  
ATCGCTGCAGCAGCTTCTTCGACAATAACGTCGGTATGTTGATTAATGGTGGCAAAGAAGT  
CATTACCACATCGGTTGATCAAGTAATACGCGCTTGGGAAATTACCGCAGGCAAGCTTTCAC  
TGGTAGATAAAAAAGCGTACCCTGTGGCGGATACAGGATCATTAGAAATCATTTCCAATGAT  
GAAGATGCTGATTCTGAGAAAACGTTACTGATCGGAGGTGTTGGTTTATCAATTTGGAAAA  
ATGA

>YDL176W 0.78 Cold

ATGGCTACTGGCAGGATTCAATTTGCTGTTTCTACTCCCTGCAATACTAAGGGTAAACCGTC  
TGGTTATAGGTTATTTGAATTTAAAAACGATCGATTAGCAC TGGTCCCATCAGAAAGAGGTT  
GTACAAAAGTAGATGTGAATGCAAATATACAAGCGTTTTGTTATTTAAGCCTAATGGTAGA  
GACACGTCAATATCTCCAGACGCAACGCATATTTTGGACTCATGTGATTACATGGTGCTGGC  
TAAATCCAACGGATTCATTGAAATCATAAGCAACTATCAATACAAGATAAAAAATGGCCTGC  
GATTAGCGCCCTTTATATCCTTAGATGTACTCCGGAAGATTTTCAATCCAATTTTTTTAGT  
GACTATATGATCGCTGGTCTTGAATATAGTCAAGGTTTATTATATTGTTGTATGTGCTCCGG  
TCGAATATATGCTTTTGTAAATGAACCTTCCCCTGATTACATTCAGTATAAGAACATGTACA  
ACCCCATGTTTCCAGATTGCTTTTTCAAAGTACATCACGATAATAATAACAACACATCTTCA  
GAAGAAGAAAAATATTTGAAGGTAGTACGCGGTACACTGGAAGGTCATGCTCTAAGCATAT  
CTGCTACTTCCCTTTGCCTATAGAACCATCCCATTTAAGATCGTCACCCGTGGTATCTTCGT  
TTTGCAATATGTATCAAGGCCTGCCATATATAGGCCTTCGATGTATTTACATATAGAACGA  
GGTATTTCCACATTCATATAAATCCATTAGACCGGTTTTGTTTCATGACAGTATCGCCACG  
ATCACCCTATTTATAAGGAAAATAATTTTACCATTGACTTATGTTACATTTTTAAGCACCT  
TTATCAGCCTAAAGAACAGTATACAGGGAGATACATGCGGTGAGATACTTTCGTGGGACAAC  
GTAGCGCAACAAAATGGATTTGGTTCTTTGTTTCAGCTGGATTAGTAACAAGTTTACATTCGA  
TACGGATATTATAAATTC AACCATTTGGGATGATATTGTAAAATATTCTGGAACAGGAATGC  
TGGATTCAGGAATCGTCTGGAAACAGCGTCAAGGTCACGCTAAAGATGACATATATGAGTTA  
TTCCACACTCAAGATATGCTGGGAAGTAGTCGCCGAAATCTTTCATT CAGTACTGCTAGCAG  
CGAACCGAGACCGCTGAGTCGAAGAAGGAGAGAATCTTTTCAAGCCTTA ACTAGAGACGCTT  
TTAGAGAAAAGAAATGGATGTACCTGTTCAACGAAGTGGGAATTAGATTCTTTTATCCGAGGA  
TTAAGAAGGAATACATTTATGGTAGATTTTGAATTTGTTGAAAAGATTTCTCATAGAAATGG  
AAATGATGGGGTGAATGAAGATGATAACACTACAGATGAAAGTGATGAAACAATGACTTCTT

TTCTAACAGATAATTACAAAAAGATGGACATTGTGTGCATCGATCATTTCGTCACGTTGAGT  
 GCATTCCGACCTCGGTACTATGATGAACCAATAATTTAAAATCGATTCAATTATCGAACAAAA  
 TGGCTCTGAAAATGGAACATAATGAAGAAGAGTGGGCAGAAAAGTCAAATGAAGGTGGATGGCC  
 AAGTGATAGATGATGAGACAGCTCAATTCAGCAGGCATTGGGAAATTTATGTTTCATTCAAG  
 AAATTTATTTATGCTGGATGATTCCTTTATGCTTTATATTGGACACACATGGAGTTTTGTGAT  
 AAATAGATTTGAAATAAAAAATACCAAAAATTTGTTAAGGAATTCGAAGGATACTATTTCGGA  
 TAATACCCCATGATTTTCGGATTGATTAATGATACAATTGTTATAATTAATGATATAGACGTA  
 GGCACAGACAATGTTTTCGCCCTTACGTTTCACTTGGTGGTAACATCAATGGCAGGAGAGAT  
 AACTGTTCTTAAAGGCGAATTTTTCAAAACTGCAGGTTAGGAAGAATAAACTGTGCGATT  
 CACTAAAGCTAAATAGAAAAGATCGGTTTGTGACAAAACCTGCTCTAATCGATTATGACGGT  
 TTAATGCACAAAAAGAAGGTTAGATTACGATGAAAAGGACCTTTATACATTCAATTGTGAA  
 AAAGGTAAAAAGAGACTAA

>YNR074C 0.79 Cold

ATGACAATTAACACAAAGAACATAGTTGTTGTTGGTGGTGTGTTTGGTGTGTCTGTGGC  
 AAATCACTTGTACAGGGAACCTGGGTGGGACATACGCAATAAAGCTCGTCACAGCATCTAATT  
 ATGTGTATTTTCTACCCTCAGCTGTCCGTTTACGCGTTTCAAAGGATTATACCAAGTCGATC  
 CTGCCGTTAAAAAATGTTCTTGATAGTGGTATTGAAGTTATCAAAGATACGGCTGCCAGCTT  
 TGATGATAAGGAGGTAGTTTTGGGGTCAGACAGGGCCATAAAGTTTGATATCTTGGTCTTG  
 CAACTGGCTCAAAGTGGGCTGATCCAATTGGTTCAACTTATACCTTCGGGGATAACTATAAA  
 GAGTATTTTGAAAGAGAGGCTTCTCGAATCTCAGATGCAGATCACATACTTTTTCTTGGCGG  
 TGGCTTTGTTAATTGTGAACTAGCTGGTGAATTGTTATTCAAGTATTTGGAGGAGATCAGGT  
 CTGGCAAAAAGCGTATTTCCATTATTCATAATTCGGATAAGCTACTGCCGGACTCTGGGTTA  
 TACAACGATACCCTAAGAAAAAATGTGACAGACTATCTCTCAAAAAATGGTATTACGTTGTA  
 CTTGAACACAGTAGGGGCTTCTTTAGACACCTCGCCGAAACGTATTTTTCTAGGTGAGGGCT  
 CATCTAAATATATAGATGCTGATTTGATTTACAGAGGCGTTGGTATTTCTCCAAATGTGCCG  
 GTCAACAGTATTTTCAGACCTTTGTGACAAGAAAGGGTTCATTCAAGTTGAAAAAACTTCAG  
 GGTAAAAGCTGTTGAGGCAGGAAACGTTTTTGGCATTGGTGATGTAACGAATTTTAGATATC  
 ACGGATTGGTTAAAAGAGATAATTGGGTTGATGTTTTGACCCGAAATGTTATAAGTTCTTTA  
 CAAGAAGGAACAGAGGCTAGTCTCGTTGATGCAGATTGTCTTGAGACAGGACATGCCCCAAG  
 TGGTGTCTCCCTTGGGCCAAATGCAGGGTTGGCCAATTTCCACTACCGTTACTTGGGACGA  
 TTAATATTCCATCGTTTTTTAATTTCTAGAGCAAAGTCGAAGAATCTTTTCTCCGACAAAATG  
 GAACCTTTATTCAAAAAATAG

>YGR185C 0.81 Cold

ATGTCCTCTGCTGCCACGGTTGACCCTAATGAGGCGTTCGGTCTCATTACCAAGAAGCTTGCA  
 AGAAGTCTTGAACCCACAAATCATCAAAGATGTTCTCGAAGTACAAAAGAGACATTTGAAAT  
 TATACTGGGGTACCGCGCCACTGGAAGACCTCATTGTGGTTATTTTGTTCCTATGACCAAG  
 CTTGCTGATTTCTTGAAGCAGGTTGTGAAGTGAAGTACTGTTCTTTTAGCAGACTTGCACGCCCTT  
 TTTGGACAACATGAAGGCGCCATTGGAAGTGGTGAAGTATAGGGCCAAATACTATGAATTGA  
 CCATCAAAGCTATCTTGAGAAGCATCAATGTTCCAATTGAAAAGCTAAAAATTTGTTGTTGGC  
 TCTTCTTACCAGCTAACTCCAGACTATACCATGGATATCTTTAGATTATCCAACATTGTTTC  
 ACAAACGATGCTAAAAGGGCAGGCGCTGATGTTGTCAAGCAAGTCGCCAATCCATTATGTA  
 GTGGGCTTATCTATCCTTTAATGCAAGCGTTGGACGAACAATTCTTAGATGTTGATTGCCAA  
 TTTGGTGGTGTGACCAGAGAAAAATTTTTGTCTTAGCGGAAGAAAATTTACCAAGTTTGGG  
 CTACAAGAAAAGAGCACATTTAATGAACCTATGGTTCAGGTTTGGCTCAAGGTGGTAAAA  
 TGTCTGCCTCTGATCCGAATTCAAAAATCGACCTTTTGGAGAACCAGCAAGTTAAGAAA  
 AAGATCAATAGTGCATTTTGTAGCCCCGGTAACGTGCAAGAGAATGGTTTACTGTCATTTGT  
 CCAATATGTCATTGCACCAATCCAAGAATTGAAGTTTGGTACAAATCACTTCGAATTCCTCA  
 TTGATAGACCAGAAAAGTTTCGGTGGTCCAATTACCTACAAATCCTTCGAAGAAATGAAATTG  
 GCTTTTAAAGAAGAAAAATTTGCCCCACCTGATCTAAAAATTTGGTGTGCTGACGCTATCAA  
 CGAGCTATTGGAGCCAATCAGACAAGAATTTGCCAACAACAAGGAATTTCAAGAGGCCTCCG  
 AAAAGGGTTATCCAGTTGCCACACCACAAAAGTCGAAAAGGCTAAGAAACCAAGAATAAG  
 GGTACTAAGTACCCAGGCGCTACTAAGACCAACGAGATTGCCACGAAACTAGAGGAAACCAA  
 ATTGTAA

>YLR002C 0.79 Cold

ATGGCTAAGAGAAATAGATCTCAATTTTCGCATTCAGGAAAGGACTGCAAAGAAAAGAAAGCA  
 CGAAGATTCCTTGTTAGAAGGCAATGTTTTCCAAAATGCACCGGAAGATATGGATGAAAATA  
 CCATATATAGCGCAAAGGCTCATCTGGGATGAAGAAGAACAGGATTACGAAATGGTTCCT  
 CGGAAGAATCGGTCTGATACATCAAATCTTGTGAAGGCCTGCCTATAAAAGTTAACGGTAA  
 AGTTGAAAGAAAATTGCATAAAGCCCAAGAAAACCAAAAGGACGATGATGAGGAAGACGAAG  
 ACTCTAATGACTCTTCAGAAGATGATGAGGGACCTAATGAAGAACAAGAAGCAGAGGCAAAG  
 GAGGATGAGCCTGATACGGAGGAAAAAATCTGCAACTAAAAGAAGACATGCCGATTTAGT  
 CACTAAAGTTATGGAGGAGCCTGAAGAAAATACTGCTGCGTTGGGGCGTCTATGTA AAAATGG  
 TGAATCTAAAAATCCTAATACTTGTAAAGTTTTCCATGTTGGCTTTGGTCCCGTGTTTAAG  
 AGTATCATACCAGGCTATAGAATTCGACCCTAATACTGAAACTGAAAAGAAGGAAAAAGTTTC  
 TAAAGAAGTCTCCAAGCTTAGAACTTTGAGCAAGCCTTAGTTTATAACTACAAAAATTACG  
 TCGGAAGATTACAGAGTCTTTCAAAAACCTCCAGTAATGCTGCTCCTATACAGTTTCATTA  
 GGGATTTTGGCCACTCAAGCCGCAAAGAATTGATTTCAACGGCATCCCATTTCAACTTTAG  
 AACAGACATTTTCACTTTACTGTTGCGTAGAATTTGTAAACCAAGAATTTCAACAGATCCAA  
 CTTCCATTCAAAATAATCCAGACATTTGAAACTCTATTAATGAGGACGAAGAGGGCTCAATA  
 TCATTCGAGATACTAAGAATTTTCAACAAAACTAAAGACGAGGAACTTCAACATCGAAGA  
 ATCTGTTTTTAAATATGTTATTATCGTTAGATGTCTTACATGACTATGACCCTAATACTAAAT  
 TGAAAGGTAACGTTAGCGCTCCTAAGCTCAAAAAGAAAAGATAGGGTCCATCTTTCTAAGAAG  
 CAAAGAAAAGCTCGAAAAGAGATGCAACAAATGAGGAAGAAAATGCGTAACGCTGAGCAAGC  
 TGTTCCTGCGGAGGAAAGAGAAAAGAAACCAATCCGAAATTTCAAAAATCGTTTTCACTATAT  
 ATTTGAATATCTTGA AAAACAATGCAAAAACCTCATTGGATCGGTTTTGGAAGGTCTAACG  
 AAGTTTGGTAATATGGCCAACCTTGTATCTATTAGGGGACTTCCTCGAAGTAATGAAAAGACT  
 TATTAGTGACACTGAATTCGATAACCTTTCTCTGCTGAGGTCCGTAAGGCTTTGCTTTGTA  
 TCGTTAGTGCACTTCTCACTTATTTCAAATACACAATATATGAAAGTTAATGTGGATTTGTCC  
 AAATTCGTCGATGGGCTTTACGCGCTATTACCTTATATCTGTCTTGATGCAGACATCGAATT  
 ATCTTATAGATCGCTAAGGTTGGCTGACCCACTCAATAACGAAATAATAAAACCATCAGTTA  
 ACGTTTCTACCAAAGCAGA ACTTCTGCTAAAGGCTCTGGACCATGTATTTTTCCGCTCTAAA  
 TCAGGGACTAAAAGAAAGGGCTACGGCGTTTACCAAAGATTGTACATGTGCATCAGCCATAC  
 CCCAGAAAAACAAGTATTGCCATTTCTTAAATTTATTGATAAATTAATGAATAGATATCCAG  
 AAATTTCAAGGCTTTACTCTTCCGAGGATAGAATAGGCAACGGTCATTTATAATGGAAGCC  
 GATAATCCTTCAAGGAGTAACCCAGAGGCAGCAACCTTATGGGATAATGCTCTTCTTGAAAA  
 GCATTTATTGTCTGTAGTTACAAAGGGGCTACGCTCTCTATCATCTAGATCTAAAGAGTGT  
 CTA AATAG

>YKR088C 0.79 Cold

ATGAGTCAGTCTTACGAAGCAGGAAATGCCAATATGGGCCAAGGGGAGGATGATGAATTTGA  
 TGGCTATTTTGAAGACTTTTGACAACGATATCATGCCAAATAGTAATAATGGACAAAGGGTTG  
 GACTAATGCTGGATTGTCATTCAATGACGAAGTAAATGTTAATGATGATGATTTTTTTAGAC  
 ATTTATAATATGTCCCTAGAGAGAGATTGATGCATAATATCAGGAAGAATGTTCAAAAATT  
 ACAGTTTTTATTTTTATTCACTACGCTTATGGCAACAGATTATCATTGTCCCTCCCGCATAA  
 TGCTAATGATAATGGGTATATTGTTGCTCGTCTTCCATAATGCGATTTTACATAAAGTTGTT  
 GTTACTTCGAACGATTTGAGAGAAAAGATGTCAACACATTTTATATTAATGGTTCTGATATT  
 CTTTGTGCAATTTCCCTCCTATGATTGGCTACTCCTTATTATCCACCCTACTGGGTTGATCT  
 ATGGTGTGAGTTTGGGGATGGGTTACGCTAGCTTTGGGATCTGTAACAGGTTCCATTGCC  
 TCTTTCGTTGTGTTCAAGACGATCTTGCATTCAGAGCAGAAAAGCTTGTGCATTTGAATAG  
 AAGATTTGAAGCATTGGCTTCAATTTTACAAGAAAACAATAGCTATTGGATTCTAGCTCTAC  
 TGAGATTATGTCCCTTCCCATATTCTTTGACTAATGGTGCCATAGCTGGTGTTTACGGTATC  
 TCGGTACGCAACTTTTCCATTGCCAACATAATAACCACACCAAAGCTGTTTATCTATCTATT  
 TATAGGTTCTCGTGTAAGAGTCTCGCAGAATCTGAATCTACAGGATCTAGGGTATTTGACT  
 TGGTAAGCATTATTATCACATTATTAATCCTAAGTCTTACAGCATGGCTCTTATACTTCAAG  
 ACTAAGAAGAGATATTTAGAACTACAAAACCGCGACCCTCAAGTGTCCACTGATCAACTACC  
 TGAATTTGCTTTTTGAGGTCTAA

>YLR032W 0.76 Cold

ATGAGTCATATTGAACAGGAAGAAAGGAAGAGGTTTTTTAACGATGACCTTGACACTTCAGA  
 AACATCGTTAAACTTCAAATCTGAGAATAAAGAGTCGTTTTTATTTGCAAATAGTCATAATG  
 ATGATGATGATGATGTTGTTGTATCAGTGAGTGATACAACAGAAGGAGAGGGAGACCGATCT

ATTGTGCCAGTCAGGCGAGAAATAGAAGAAGAAGGCCAGAATCAGTTTATTACAGAGCTTTT  
 AAGGATTATTCCAGAAATGCCAAAGGATCTTGTGATGGAACCTAATGAAAAATTCGGCAGTC  
 AGGAGGAAGGGCTCTCTTTAGCATTATCACATTACTTTGATCACAATAGCGGGACGTCTATC  
 AGCAAAATACCGTCTTCCCCGAATCAACTAAATACACTCTCAGATACCTCAAATTC AACCTT  
 GTCCCCATCTTCATTCATCCTAAAAGAAGAATATACGGGTTTCAGAAACCAAACACGAT  
 TAGAAGATAAAGTTACTTGGAAAAGATTTATAGGTGCTTTGCAAGTCACTGGTATGGCTACC  
 AGACCCACCGTCAGGCCCTTGAAGTACGGCTCTCAGATGAAGCTAAAGAGATCAAGTGAAGA  
 GATTTCTGCTACTAAAGTATATGACTCACGTGGTAGAAAAGAAAGCGTCCATGGCTAGTTGG  
 TAAGAATTTTTGATATCCAATATGATAGAGAAATTGGCAGAGTTTCGGAAAGACATTGCTCAA  
 ATACTATACCCTCTTTTAAGTTCACACGAAAATAAGTTTTGAAGTTACATTGATTTTTTTGTGA  
 TAATAAACGGTTGAGTATAGGTGATAGCTTTATTCTACAATTGGATTGCTTTTTAACATCTC  
 TCATTTTTTGAGGAACGTAATGATGGAGAATCCTTGATGAAAAGAAGACGTACAGAGGGAGGA  
 AATAAAAGAGAGAAAGACAATGGAAATTTTTGGAAGAACATTGACTGAAACTGATGAAGAGCT  
 AGAAAGCCGCTCGAAAAGACTGGCTCTACTAAAGTTATTTGATAAATTGAGGCTAAAGCCTA  
 TTTTGGACGAGCAGAAGGCATTAGAAAAGCATAAAATAGAGCTTAATAGTGACCCCGAAATC  
 ATTGATTTAGATAACGACGAGATTTGCTCTAATCAAGTGAAGTCCATAACAATCTCCG  
 AGATACTCAGCACGAAGAAGAAAACAATGAACCTTGAATCAATTGAAAACATTTTTATAAGGCCG  
 CACAATCATCAGAATCTTTAAAAAGTTTTGCCTGAAACAGAACCTTCTCGCGATGTCTTCAAG  
 CTAGAACTAAGAAATTTCAAAAAGCAAGGTCTTACTTGGATGCTAAGGAGGGAGCAAGAGTT  
 TGCCAAAGCAGCCTCTGATGGTGAGGCTTCAGAAACGGGTGCTAATATGATAAACCCATTAT  
 GGAAGCAGTTCAAATGGCCAAATGATATGTCGTGGGCAGCTCAAATTTGCAGCAGGACCAT  
 GTAAACGTTGAAGATGGCATATTCTTTTTATGCGAACTTACATTCTGGTGAATTTTTCGCTAGC  
 AAAACCTATATTTAAAACTATGATAAAGGGTGGCATATTATCAGATGAAATGGGGTTGGGT  
 AAACAGTGGCAGCGTATTCTTTAGTTTTATCTTGTCTCACGATAGTGATGTTGTTGACAAG  
 AAAGTGTGATATTGAGAACACAGCAGTCTCAGATAATCTTCCAAGCACTTGGCAAGATAA  
 TAAGAAACCATATGCTTCAAAAACAACGCTAATCGTGGTCCCAATGTCTTTGTTAACGCAGT  
 GGAGTAACGAGTTTACAAAAGCTAATAATTCCCCGATATGTATCATGAGGTGTATTATGGT  
 GGGAAATGTTTTCCAGTTTTGAAAACCTATTAAACCAAGACAAAAACCCCTCCAAGTGTAGTCTT  
 TACTACATATGGTATTGTTCAAAATGAATGGACTAAACATTCCAAGGGAAGGATGACAGATG  
 AGGACGTCAATATATCTTCCAGGCTTATTTTTCTGTCAATTTTTATCGCATAATAATCGACGAG  
 GGTCAATAACATTAGAAAACAGAACGACAGTTACATCTAAAGCAGTCATGGCTTTACAAGGCAA  
 ATGTAAATGGGTTTTAAACAGGAACACCAATTATTAACAGGCTTGACGATTTATACAGTCTGG  
 TTAAGTTTTTTAGAGTTAGATCCCTGGCGGCAAATTAATTACTGGAAGACCTTTGTATCAACG  
 CCTTTTGAGAGTAAAAATTACAAACAAGCATTGATGTGGTGAATGCAATCTTGGAAACCGT  
 ATGTTAAGAAGGACAAAACAATGAAAGATAAAGATGGTAAGCCATTAGTAGAGTTGCCAC  
 CAAAGGAGGTCGTTATTTAAAGACTTCCCTCAGTAAATCTCAAGATCTTCTATACAAGTTT  
 CTGTTGGATAAGGCTGAAGTTCTGTTAAATCGGGTATTGCACGCGGTGATTTATTGAAAAA  
 GTACTCCACTATCCTTGTCCATATTTTAAAGATTGAGGCAAGTCTGTTGCCATCCCGGTCTTA  
 TTGGGAGTCAAGATGAGAACGATGAGGATTTATCTAAAAATAATAAATTGGTTACGGAACAA  
 ACGGTGGAGCTTGACTCTTTAATGCGTGTGTTTCCGAGAGATTTCGATAACTCATTTCCTAA  
 GGAGGAATTAGATGCAATGATACAAAGATTTAAAGTTAAATATCCAGACAATAAATCGTTTC  
 AGTCTTAGAGTGCTCCATCTGCACAACGGAACCTATGGATTTGGACAAGGCTTTATTTACA  
 GAATGCGGCCACAGTTTTTGTGAGAAATGTTTATTTGAATATATTGAGTTTCAGAACAGTAA  
 GAATTTGGGTTTTAAAGTGCCCCAATTGCCGTAACCAAATAGACGCTTGTGCGTTGTTGGCAT  
 TGGTACAAACGAATAGCAACTCGAAAATTTGGAATTCAAACCATATTCACCAGCCTCCAAA  
 TCAAGCAAATCACTGCTTTATTGAAGGAGCTTCAATTGCTACAGGATAGTTCCGGCAGGCGA  
 ACAAGTTGTCATTTTTTCCCAATTTTCTACATACTTGGATATCCTGGAGAAAGAGCTAACTC  
 ATACTTTCTCAAAAGATGTTGCAAAAATTTATAAATTCGATGGACGTCTCTCATTAAAAGAA  
 AGAAGTAGTGTATTAGCAGATTTTGCCGTTAAAGACTATAGCAGGCAAAAAATCCTATTACT  
 CTCGCTGAAGGCTGGTGGCGTGGGTTTGAATCTAACGTGTGCTTCCACGCTTATATGATGG  
 ACCCATGGTGGTCCCGCAGTATGGAAGATCAGGCAATCGATAGACTGCATAGAATTGGCCAG  
 ACAACAGCGTCAAAGTTATGAGATTTATCATACAAGATAGCATAGAAGAAAAAATGCTACG  
 CATTCAGAAAAGAAGAGAACCATCGGTGAGGCCATGGACACAGACGAAGACGAGAGAAGAA  
 AAAGGAGAATTGAAGAAATCCAGATGCTGTTTGAATAG

>YDR030C 0.72 Cold

ATGGATCCATTTTTAGAGTTCAGAGTAGGCAATATCTCATTAATGAATTTTATAGAAGAAC  
TATTCAAAGCGAATTTGAGAGGATCCTTGAAGATCCCCTATCAAATATGAAAACTACAGAT  
TTAGTAAACAATCAAACATAGTACAAAAGAAAAACACCGTTAAGTATAGGTGTTAACTGT  
CTTGATATTGATGATACTGGTCAAGTGTATTAGGAGGTGGAGATGATGGGTCACCTTCCAT  
TTGGGGTTTAGATGAATCATTGCACCGCAATGATGAAGGTGAACAGGAATTGATCAATAAAA  
GGCTAAACTATATCAAGCGACAGCCTCACCAATCAGATGATGAGCCTGCTCAAATAATGGGT  
TATAAAAATAAAAAGAACACGAATAAACGACAACAACACTATGAGACTGGTGCACAGTTTTCA  
AACACAGAGAAAACAATATCGAATGTATAGACAGTCTAGTGCTGCAGTTCAGTTCAAAAGAT  
CACACATATCAAATAAAACGGATTCTCCTATCGGGTTTAGTGAGACACTATCTGAAACAGAT  
TCAGAAGCTTCCATATCTCACCATAAATATGGTATAACAACTTTGAAGTGGTATAAGGCTGA  
TAATGGGATGTTTTTACTGGCTCAAATGATAAACTGTAAAAATATGGGACACAAAACAGGT  
TTGAAGCGGTTCAAGATATAAACCTGGGGTATAAAATAAAATCAAATTGATAATAACGTTGTC  
GACGACAGTTCCTTGCTTGTAGTGGCAAGTGAAGACTACTATCCAAGATTAATTGACCTGAG  
AACCATGAATTCAGGGGTAACGCGCTTGGAAATGGGAAATCAAACACGAATGCAATCAGAAA  
TTTTATGCTGCAAATTTAACCCCGTCAGGGAACAGATTATTGCTTGTGGTGACATGGAGGGT  
GGGGTAAAATTATGGGATCTAAGAATGAGGAACAGACTGTATTCAGAATTGAAAAGAAAATAA  
AAATAGGTTCAAGACTATAAAATAACGATGATAATGACGATCAAAGCGATGTCTATTTTCAGCT  
CTAACCAATCAAAGCCCATCTGAGATGTTGCAGTGACATTGTTTGGAAATAGTGAGGGTTCA  
GAGCTATGTTTCAGTCGGCATGGATGGAAAACCTGAATGTTTGGAGGCCATTTACGGAAATCT  
GCAACCAGAAGGTCCTAGCTAGTTATTCCAGTTGGGAACACAAGACCTGAGCCGTATCAAAT  
ACAAAAAAGAGTATCTCGAAGGTTGCTTTGGTTTGACAAGTTTTTACTGTGTATTACTGAC  
AATGGTGAAGTAGAAATATACAATACGGAGGAAAAAAACTTTGGAACAAGCTCGAATACCC  
AATGGTTAATCAGGTAAAAAATCAGGCTTCGCATTGTCAGTTTAGTTCATGATTGTGC  
AAACAAATATAATGAATTCAGTTGGCCTCAAATTTGTTCTTTGGAACATAACAACACCGTT  
AGCGACGGCGGATCCATCTTTGAATGTTTCATAA

>YKR100C 0.79 Cold

ATGACTGCCAGCACATCAGTTGCGGTGGGTTGTGCGGTGGGTATACCCGTCGGTGTAGGTAT  
TATAATAGCAGTATGTTTCTGGTTTAACTACAAAAAAGATACAAGAGGGAGGAACAAGACG  
ATAGAGAATTGGAAAGGGCTATTTATGATGAAAGTGGTTTCGTGTCCTTTGACAATTTTGGGA  
CCCTTAAGAGACAGTAAAGATGAAGCAGCACTAGCCAGCTCCGAGCTAAAAAATCCTGATCA  
CACTTCTGGTTCATCGGAAGGATCTGCTCATCCAGAAGAAAAAGATGGAAAATCGCGAGATC  
AAGAGAAACCGTTAGGGAAAAAGAATAGTAAATACTATGTGCCAGCATAACCGTAGGAAAATA  
AATTTACTTCAAGTACGAAATAAATACTACGGCAATAATGCCAGGCAGAAGTCCGTTGTGGA  
TTTACCAAGTATAAATAACAGCTCCAATGTTTCCTTATCATCTTCCAACGGCATATAACAA  
AGAGACAGATCAGCGTTTATGATCAGATGGTCCCTGTTATTTCTGATGAAGGACCAAACTTT  
TTCGCAGATCCTTCCAGTGATACTAATACTAGCAATGACCAAACAAAGCTTTCGATGATAGA  
ACTTAAACATAAATACTCGCCAATCTAGTAATGAAAATCTGATAAGAAAATTTGCAGAATCAGG  
ACTTTGGTTTCGATTTACCCAAGGAGAGCTTCATCCTCGTTTTTAAATGGTAACATTTCAAAC  
GCGTCTTCCATACAAGGAATCCTCTATAACATCGGTAAATAAGCGCGATGCCCTAGAGGA  
TGTGTTTGCAACACCCAAAAGTGGGCTCAATCACAGTTACCAAACACTTTTGATAAAGATA  
ACGAAGGAATGGATGCTGACCACTCGGTAAAGGATAGCAGGTCTGCAATAACAGATAAAGAT  
AAGGATTTATACAAATTACAGAATAACTATGATGTGGGCAATATCGGGGAAATTGCTGAGGA  
AGATCAATACGAAAACGAATTTACCAACTACTCACAGAGTAAGAGAGAGTTCATAGAAAGTC  
TAAGGCCTAAATAG

>YKR001C 0.69 Cold

ATGGATGAGCATTTAATTTCTACTATTAACAAGCTTCAGGACGCTTTGGCGCCCTTAGGAGG  
AGGATCTCAATCTCCTATTGATTTACCACAGATCACTGTTGTCGGTTCAGTTCGTCAGGAA  
AGTCGTCGGTTTTGGAGAACATTTGTTGGTAGGGATTTCTTGCCAAGAGGTACTGGTATTGTC  
ACCAGGAGACCTTTAGTGTTACAATTGATTAATAGGAGACCAAAAAAGTCAGAACATGCTAA  
AGTAAACCAAACCTGCTAATGAATTGATTGACTTGAACATCAACGATGATGACAAGAAAAAGG  
ATGAATCAGGAAAGCACCAGAACGAGGGACAATCTGAAGACAATAAAGAGGAATGGGGTGAA  
TTTTTGCATTTACCTGGTAAGAAGTTTTATAATTTTGACGAAATTAGAAAGGAAATCGTCAA  
AGAACTGACAAAGTGACAGGTGCCAATTCAGGTATTTCTTCTGTGCCATTAACCTTGAGAA  
TTTATTTCTCCGCATGTTCTTACTTTGACGTTAGTGGATTTGCCTGGGTTGACGAAGGTCCC  
GTAGGTGACCAACCTCCTGATATTGAAAGACAAATTAAGGACATGTTGTTAAAGTATATTTT

GAAACCAAACGCTATCATATTATCTGTTAATGCCGCTAACACCGATTTAGCCAACAGCGATG  
 GTTTGAAGCTGGCTAGAGAGGTCGATCCAGAAGGAACGAGA ACTATTGGTGTCTTGACAAAA  
 GTCGATTTGATGGATCAAGGTACAGATGTCATAGATATTTTGGCTGGAAGAGTCATTCCTTT  
 GAGATATGGTTATATCCCAGTTATCAATAGAGGTCAAAAAGGATATTGAACACAAAAAAACAA  
 TCAGAGAAGCCCTTGAAAACGAAAGAAAATTTTTTGAGAACCATCCCTCTTACAGTTCTAAA  
 GCTCATTACTGTGGTACACCATATTTGGCTAAAAAGTTAAACTCAATCTTATTACACCACAT  
 TAGGCCAACTCTGCCAGAAATCAAAGCGAAAATCGAAGCCACATTGAAAAAATATCAAAACG  
 AACTTATAAACTTGGGCCAGAACTATGGATTCAGCTAGTTCGGTTGTTTTGAGCATGATT  
 ACTGATTTTTTCCAATGAATATGCCGGTATCTTGGACGGTGAGGCCAAGGAGCTTTCAGTCA  
 GGAACTTTCTGGTGGTGCTAGAATTTCTTACGTATTCCATGAAACTTTCAAAAATGGTG TAG  
 ACTCTTTGGATCCATTGACCAGATCAAAGATTCTGATATCAGAACCATTATGTACAATAGT  
 TCAGTTCTGCCCATCTTTGTTTGTGCGGTACCGAAGCTTTTGAAGTTTTAGTTAAACAGCA  
 AATTAGAAGATTTGAAGAACCATCTCTACGTTTAGTTACTCTGGTGTGGTATGAACTTGTTC  
 GTATGCTAAAACAGATTATTTTACAACCAAAGTACTCAAGGTATCCTGCTCTAAGAGAAGCG  
 ATTTCTAATCAGTTCATTACAGTCTTAAAGGATGCTACTATTCCTACGAATGAGTTTGTGT  
 CGATATCATCAAAGCTGAACAAACTTACATCAATACAGCCCATCCCGACCTTTTGAAGGGTT  
 CTCAAGCAATGGTTATGGTGGAAAGAAAATTACATCCTCGCCAAGTCGCTGTTGACCCAAAG  
 ACGGGTAAACCATTACCAACCCAACCATCGTCTAGTAAGGCGCCAGTTATGGAAGAGAAATC  
 AGGATTTTTTGGTGGGTTCTTCTCCACTAAAAACAAGAAGAAATTGGCAGCTTTGGAATCCC  
 CACCTCCTGTTTTAAAGCTACTGGCCAAAATGACAGAGAGGGAAACAATGGAACAGAAAGTA  
 ATCAAGTTGTTGATTAGTAGTTATTTCTCTATTGTCAAAAAGAACATTGCCGATATTATACC  
 AAAGGCTTTGATGCTTAAATTGATTGTGAAAAGTAAAAGTATTCAGAAAAGTTTTACTCG  
 AAAAAGCTTTACGGAAAGCAAGATATTGAAGAATTAACGAAAAGAAAACGACATAACCATTCAA  
 AGAAGAAAAGAAATGTAAGAAGATGGTTCGAGATATTGAGAAACGCTAGTCAAATCGTCTCCTC  
 TGTTTAG

>YLR397C 0.75 Cold

ATGGCTCCTAAATCTAGTTCTTCCGGTTCCAAAAGAAAATCATCGGCAAGTTCTAATAGTGC  
 TGATGCAAAAGCATCCAAATTTAAATTGCCGTGTAATTTATTACCAGACCACATCCTTCTA  
 AAGATCATGGCAAGGAAACATGCACAGCATATATTCATCCTAACGTATTATCCTCGCTTGAG  
 ATAAATCCGGGATCATTTTTGTACTGTGCGGTAAGATAGGCGAAAATGGTATTTTTAGTAATAGC  
 TAGAGCGGGTGATGAAGAAGTACATCCTGTTAATGTTATCACCTTTCCACAACATATACGAT  
 CTGTTGGGAACCTTATCCTTGGTGATCGTCTAGAATTAAGAAAGCCCAGGTGCAACCACCT  
 TATGCCACTAAGGTTACCGTGGGTCCTTACAAGGATATAATATTTTGGAAATGTATGGAGGA  
 AAAAGTAATTCAAAAGCTACTGGATGATAGTGGCGTTATAATGCCTGGAATGATTTTTCAA  
 ACTTAAAACAAAAGCAGGTGATGAAAGCATTGATGTCGTAATTACAGATGCGAGCGATGAT  
 TCGCTTCCCGACGTCAGCCAACCTAGATCTTAACATGGACGATATGTACGGTGGATTAGATAA  
 CCTGTTTTATCTATCTCCACCTTTTATATTAGAAAAGGCTCCACACATATAACTTTTTCGA  
 AAGAAACCCAGGCAAATCGTAAATACAATCTTCCGGAGCCCTTATCCTATGCAGCAGTGGGC  
 GGCTTAGACAAGGAGATTGAATCACTGAAAAGTGTATTGAAATACCTCTTCATCAACCGAC  
 GCTATTTAGTAGCTTTGGTGTCTTCCCCCTCGAGGTATACTTCTTCACGGACCCCGAGGTA  
 CTGGTAAAACATATGCTTTTTGAGAGTTGTAGCAAATACGTCCAACGCACACGCTCCTAACCAT  
 AATGGCCCTCAATCGTCTCCAAATATCTTGGTGAAACGGAAGCGGCATTAAGAGATATTTT  
 TAATGAAGCAAGGAAGTACCAGCCTTCCATTATTTTTCATTGACGAAATGATTCAATAGCAC  
 CAAATAGAGCAAACGATGACTCCGGTGAAGTTGAGAGCAGAGTCGTGGCTACATTGCTTACC  
 CTAATGGATGGCATGGGCGCTGCAGGTAAAGTGGTGGTAATTGCTGCTACAAACAGGCCATA  
 TTCTGTCGACCCTGCTCTCAGGAGACCTGGCAGGTTTGACCAAGAAGTAGAAATTGGTATAC  
 CAGACGTTGATGCCAGATTTGACATTTTAACTAAGCAATTCCTCAAGAATGTCCTCGGATCGT  
 CACGTATTAGATTCGAAGCGATCAAGTACATTGCTTCTAAAACGCATGGCTATGTTGGTGC  
 TGATTTAACTGCTCTCTGCAGAGAATCAGTTATGAAGACGATACAACGAGGACTAGGAACAG  
 ACGCCAATATTGACAAGTTTTCCCTAAAAGTTACATTGAAAGATGTGGAGAGCGCCATGGTT  
 GATATCAGACCCAGCGCAATGAGAGAAATCTTCTTAGAAATGCCAAAAGTTTTATTGGTCTGA  
 CATTTGGCGCCAAGAAGAGCTTAAAACAAAAGATGAAAGAAAATGATACAGTTGCCTTTGGAGG  
 CTTCCGAGACTTTTGGCAGGCTGGGAATTTCTGCACCAAAAAGGTGTATTACTTTACGGGCCG  
 CCAGGTTGCTCCAAGACATTAACCGCAAAAAGCTCTCGCTACAGAATCGGGTATCAACTCTT  
 AGCTGTGAAAGGGCCTGAAATTTTTAACAAGTATGTAGGGGAATCCGAAAGAGCTATAAGAG  
 AAAATTTCCGCAAAGCACGCTCTGCAGCTCCAAGTATTATCTTCTTTGATGAAATCGATGCA



TTATCTCCTGATAGAGACGGGAGTTCACCTCTGCAGCTAATCACGTGCTCACATCTTTACT  
 CAATGAGATTGATGGTGTGAAGAGTTAAAGGGTGTAGTTATTGTAGCGGCGACGAATAGAC  
 CTGATGAAATAGATGCTGCTCTTCTAAGGCCTGGTAGGTTAGATAGACACATTTACGTTGGC  
 CCTCCAGACGTAAACGCCCGCTTGGAAATCTTAAAGAAGTGCACAAAGAAATTTAATACAGA  
 AGAGTCTGGAGTCGATCTTCATGAATTGGCAGACCGTACAGAAGGTTATTCCGGAGCTGAAG  
 TTGTGCTGCTTTGTCAAGAAGCGGGCTTGGCTGCCATAATGGAAGATTTAGATGTGCGAAAA  
 GTGGAATTACGTCATTTTGGAGAAAGCTTTTAAAGGAATTGCTAGGGGCATTACTCCAGAAAT  
 GCTCTCTTATTATGAAGAGTTTGTCTAAGAAGCGGTTTCATCTTCGTAA

>YAR061W 0.78 Cold

ATGCCTTATCACTATTTATTTTGGCACTCTTCACCTACCTGGCCACGTCCAATGTTGTTTC  
 AGGAAGTACACAAGCATGCCTGCCAGTGGGCCCGAGGAAAAATGGGATGAATGTCAACTTTT  
 AATAACTCATTACTGGATTCAACAACGTATTCCTACCCGCAATATATGACTTCTGGATAT  
 GCCTCGAATTGGAATTAG

>YNL222W 0.76 Cold

ATGCCTAGTCATCGCAATTCAAACCTTGAAGTTTTGCACAGTTTGTGCATCAAACAACAATCG  
 TTCAATGGAATCGCATAAAGTCTGCAAGAAGCAGGCTATAATGTTAGCTCTTACGGAACAG  
 GTTCAGCTGTGAGACTGCCTGGTCTATCGATAGATAAGCCTAATGTGTACTCATTGTTGAC  
 CCTATAATGATATATATAATGATCTTTTATCACAATCAGCAGACCGTTACAAGTCGAACGG  
 TTTATTGCAAATGCTGGATCGTAATAGAAGACTCAAAAAAGCACCTGAAAAATGGCAAGAAA  
 GTACAAAAGTCTTCGACTTCGTTTTTCACTTGTGAAGAGAGATGTTTTGATGCCGTTTGTGAA  
 GATTTGATGAATAGAGGTGGGAAATTAACAATAAGTGCATGTAATTAATGTTGACATTA  
 AGATGATGATGAAAATGCTAAAATTGGTAGCAAAGCTATATTGGAATTAGCTGATATGCTCA  
 ATGATAAAAATAGAACAATGTGAAAAAGATGACATTCCTTTGAAGATTGTATAATGGACATT  
 TTAACCTGAGTGGCAAAGCTCACATTCTCAACTACCGTCATTATACGCTCCTTCATATTACTA  
 A

>YGR008C 0.73 Cold

ATGACGAGAACAACAAGTGGACCGAACGTGAAGGAAAGGCTGATCCAAAGTACTTTTCGCA  
 CACTGGTAACCTACGGTGAATCTCCAAATCACATCAAGAAGCAAGGTTCCGGCAAGGGTAATT  
 GGGTAAGCCAGCGGATGAGATTGATGACTTAATTGATAATGGTGAAATACCCCAAGTGTTC  
 AAGAAAGATAGAAGAGGCTCAAATTTGCAATCGCATGAACAAAAGTTTGAAAACGTCCAAAA  
 GGAATGA

>YOR196C 0.73 Cold

ATGTATAGACGATCTGTTGGAGTACTATTTGTTGGGAGAAATACAAGATGGATTTTCGTCCAC  
 TATTAGGTGTGGAACGAGCGCAACTCGGCCAATAAGATCCAATGCATTGAATACTGATTCAG  
 ATAACGCTAGCGTTAGGGTACCAGTTGGAAATTCAACTGAGGTTGAAAATGCAACCAGTCAG  
 TTAACAGGGACTTCGGGAAAAAGACGCAAGGGGAACAGAAAAAGAATTACAGAGTTCAAAGA  
 TGCTCTTAATTTGGGTCCATCTTTTGCAGATTTTGTTCAGGTAAGCTTCGAAAATGATCT  
 TGGACCCTCTGGAGAAGGCAAGGCAAAATACAGAGGAAGCTAAAAACTACCTCGTTGGCTT  
 AAGGTTCCCTATTCCTAAGGGTACCAATTACCATAAATTGAAAGGCGACGTAAAAGAATTAGG  
 CCTGAGTACTGTTTGTGAGGAGGCAAGATGTCCCAATATTGGTGAATGTTGGGGAGGCAAAG  
 ATAAATCTAAGGCAACGGCAACAATTATGCTGCTTGGTGATACTTGCACCTCGTGGATGTAGG  
 TTTTGTCTGTGAAGACCAATAGAACGCCTAGTAAGCCGGACCCAATGGAGCCCGAAAAATAC  
 TGCCGAAGCTATCAAAGATGGGGGTTGGGTATGTTGTTTAACTACCGTTGATAGGGACG  
 ATTTAGTCGATGGTGGTGTAAATCACCTGGCCGAGACGGTTCGCAAAAATCAAACAGAAGGCA  
 CCAAATACTCTTGTAGAGACTCTTTCTGGTGAATTCAGAGGTGATTTGAAGATGGTGGACAT  
 TATGGCACAATGTGGGCTTGATGTTTACGCACATAATTTGGAAACAGTTGAATCACTAACAC  
 CACATGTCAGAGACAGAAGAGCTACTTATAGACAGTCTTTGAGTGTTTTAGAAAAGGGCAAAA  
 GCTACGGTTCCGTCCTGATTACTAAAACATCAATAATGCTGGGTCTAGGAGAAACTGATGA  
 GCAAATTAATAAACTTTGAAGGATTTGCGCAATATTCAATGTGATGTTGTTACATTTGGTC  
 AATATATGAGGCCAACCAAGAGACATATGAAAGTCGTAGAATATGTGAAACCCGAAAAGTTT  
 GACTACTGGAAAAGAGAGAGCTTTAGAGATGGGATTCCTGTATTGTGCATCTGGACCCCTAGT

AAGATCGTCATATAAGGCTGGTGAAGCATTATTGAGAACGTTTTGAAGAAAAGAAACATGA  
AATAA

>YLR047C 0.81 Cold

ATGAATTTAAAGTCCATCGTTAGCTGGTTCAAGGAACATCTTCCCAGTTTTGATGTGCGACGT  
GGACAAGCATTTTAGAACTTTAAGAGTCCGCAAATATTCTCAGATATGCTTTTTAATTTCTT  
TCATTATAATATGTGTTATTATACCCTTAATGAATTATTTGTTGCTAACTGACAAATTCCTC  
AAAATATGTCACCATTTAAAGCATCATGTTTTCAACAGAAGATCATGGGTTACAAAAACACA  
TATGTATCACAAACAGTCACTACAACATGTTTAATATGCTTTGTTTTACCTCGTTTTTTG  
TTATAACAAGGCGCTAACGGAGATCTGTTAGAAATTACTAAGCGAATGGGGAGAATTTCCGTT  
GCTTTGATGCCACCTTACTATTTCTAACGTTGAGGCCATCACCGTTACCTCACACGTTATA  
CTTAGCATTGTTACCTCTCCACAAATGGATTTCCAGAATTGTTGTGCTTGAATCTATTCTAC  
ACACGTGGTTCTATCTCTATTACATGTACATTAATGATACGTTATACGTGAAAATGAGAAAA  
CTACCCAACATTTATGGGGTTATTGCCCTCGGCCTTTTCTACTGATTGCCATCACCTCTGT  
GAGATATGCCAGACGATGGAGCTACAGAGTTTTTTACTATGTTCACTATGTAAGCACATGGC  
TTATTTTGGTGTCTTACATTATCACGCTCGCCAGGAATTTTCATATTATACCCTTTAAAT  
GTGCTCATATTAACGGGACAAATCGTCTATAGGCTCCATATCACCAATGTTACGAGAGTTAC  
GATAGTACCCATTTCTTCATCATTTGTCTCTTTTGGAGTTCCCATTAACCGATTTACCCAAAA  
AGCCCATCCTACCAGGAGGGCATCTAAGGATCAACATTTACCATAGAAAATTTTTTAAGGAGG  
TTTTTCTCCCATTTGATACCTTCCAACATCCTTTTACTATTGCTAGTATTTCCAAGTGATAA  
TTTGGTCAGGTTAATTATTAGAAACGGGCATTTTCCATTGCGTACAAATGAAAAGTATTACA  
TTACAGGGGCTTTTGAACCTGAGTTGAGTTTCATTTCTAAACCTACTGTTCTTTTAAATATT  
ACCACGAAATCTTCCAAGAATCCATTTGAAAACAATTCTTCTGCACTAATAAATTCGCCTTT  
AAAATTTCTAATTAAGCGCAAAGAGTGTATTATGTGTGTTGGAGGTTTCAGGAATTTCCTTTG  
GCTTACCCTACTTCGTATTCTAACTTCAACGGTGTAAACGTTAGGCTCCTTTGGGTTTCT  
AGAGATTATAAGGATCTGGAAGTATTGAACCCTTCAAAAACAATTTTGAAGGTATGGAGAT  
ATATATTAGTGGCACCAGGCAACGAACAGGACATAGAAAATGATTATATTGACTATCATG  
ACTGCGCTGCTGATATTAATGATGAAGTCAGGAGTATTTCTTCGAGCGGCCGAGTTTCAGAA  
CTGGGAGATAATTCATGTTATCAGATGGAAATCCCCAACCTACGGAGCCCAATGAGAACAC  
AGCCCTTCTAAGTAAGAAATCTACCTTGAGAAACCATCACCCACCAAAAACAAGTGATATAC  
CTGACATCAATGCTGATGACGAGATAGATTTTACATATGCTTTTACGAGATCCAAATCAAGG  
AAAAATACTGCACAAGGAACCTTAACCTACACATTTCTTCGTTTAAACGGATCGAGCGTTTTCAG  
ACAACCAAAGATCATTGAGCCACCTGCCAAGATCCTTGTTTAGAGGCGGCCTAAAAAGA  
TCAGAATTTCCCGCAGGTGTTAAAGTGTCTTTGGCAGGCCTACACTTGGAGATAAGGATTAT  
GAATGGTGTCTGCAAACCGAATGTGATGCAGAGACGGATTCTATTCAATGTTGCAGGTGGGC  
GAATCAAGGCAGAGACCATGCTGAATATTTGTCACAAGTATGGGTTCTCGCTGCAGGCCCTA  
GAGGCTTAATTGAAAGCACCAAAAAGATGGGCGACAGATGGTGGTTTACACTTTTACGGAGAA  
AGTTTTGCATTATAA

>YKL011C 0.78 Cold

ATGTCGACAGCACAGAAAGCTAAGATATTGCAACTCATCGATTCCCTGCTGCCAAAATGCAAA  
AAGCACACAACCTGAAATCTTTATCATTGTATTGGAGCAGTAAATGGCAGCAGCAAAGAAG  
CTAAAAGAACCTACATTTCAAGAACAGTGTGAATTTTTGGAGAAGTTACGACAACAAAAGATA  
AGAGAGGGAAGAATTAACATATTGTCTATGGATGCTGGTGTCTTAACTTTGCTTTCTCTAA  
GATGCAATTGCTCAATAATGATCCGCTCCCTAAAGTACTAGACTGGCAAAAAGATAAATCTAG  
AGGAGAAATTTTTTCAAAACCTCAAAAAGTTAAGCTTGAATCCTGCTGAACTTCTGAGCTT  
GTATTTAACCTTACGGAGTATTTATTTGAATCTATGCCGATACCAGATATGTTTACAATTGA  
AAGGCAACGTACCAGAACTATGTCTTCGAGGCATATTTTAGACCCAATTTTAAAAGTGAATA  
TTCTCGAACAGATTTCTTTCTTAACTTGGAAAATAAAAATGAAGTATACGAATAAAAATACCG  
AATACGTCCAAGTTGAGGTATATGGTATGTTTCGTCGATCCACATCGGATGACTTCATATTG  
GTGCATTTCAAAGAGAAGAGACACCGACCAGTTCAAAAAGTTAAAATCTAACAAACATAGCA  
AAGATTTCTCGAATAAAGCTAGTGAAAAAATACTTTCAACCTCAATACTAGAAGGTAATTC  
ACTAGTTCTACAAAACCTGGTCGAGTTCATAGGAGTTTGGAAATAATAGGATAAGAAATGCCCT  
TACCAAAAAAAGTTTCAAGCTATGTGATATACTAGAGATCCAAGATAATTCGGGGGTGA  
GAAAAGATGACGATTTGGCAGATTCATTCTCCATTGTTTGTCTTGGATGGAGTGGTTAAAA  
AATTATGAAAGTATTACTGAACTCTTGAATTCAAAACACTGGTTAAAACACAGTTCCGACA

GGTGTTTGAATTTTGTGAAAATAAGGTACAAAAGCTGAAATTTTTGCAGAACACTTACAACA  
ATGACTAA

>YCL056C 0.81 Cold

ATGGTTTTCGAAGAAAAATACGGCTGAAATCAGTGCAAAAAGATATATGGGAGAATATATGGAG  
TGGTGTAAGTTCGCTGCTTGTATTTCTTCGCAGTATTGGAAAACCTAGGCGTGGTCAACGATA  
AGTTATATGTAAGTGGGCTATTACGGAAAGTTGGCTGTGTTACTCGTGCATTTTCAGTGATA  
AAATGTGTATGGAAATTAATAAAATTATGCAAGGTGAAATTTAAAATCGATCAACGATTGGA  
TGGGGAGGGAAAATGGTCTAGTAAAGGATAAGTTGATAAACTTCAAGAAAAAATATAACGAAC  
ATATCAGACATATTACTGCTGCTTTACTCCAAGATTTGAGCTATTTAATGGTTTTAATCTAT  
CCAGGGACGAGGTATTTAAAAGATTATCTAACATAATAACACTTTGTAGAATAATTGTATA  
A

>YDL028C 0.73 Cold

ATGTCAACAACTCATTCCATGATTATGTGGATTTAAAATCGAGAACTAATACACGACAGTT  
TTCAGATGACGAAGAGTTCACTACGCCTCCAAAACCTAAGCAATTTCCGGATCAGCTTTACTTT  
CCCACACAGAAAAAATTCAGCATCAGAGATATTATCAAGTCATAATAATGACAAGATCGCA  
AATCGATTAGAAGAAATGGACAGGAGTTCATCAAGGAGTCACCCCCACCGTCAATGGGCAA  
TTTGACATCCGGTCATACTAGTACCTCATCGCATTCAACCTTGTTCCGGACGATATCTGAGAA  
ATAATCACCAGACTAGCATGACGACGATGAACACTAGTGACATAGAGATAAATGTTGGAAAT  
AGTCTTGATAAGAGTTTTGAAAAGGATAAGGAATTTGCGACAAAATATGAAAGAAGATATTAC  
GGCAAAGTATGCTGAAAGGAGAAGTAAGAGATTTTTAATATCCAATAGGACAACGAAGCTGG  
GTCTTGCAAAGAGAGCGATGACTTTGACAAAATATCTTTGATGAGGATGTGCCTAACTCTCCA  
AACCAGCCAATAAATGCAAGGGAGACAGTGGAAATTACCACTTGAGGATTTCTACCAAAACAAA  
CTTTAAAGAACGAAGAGAGAATACGGATTATGATTCAATTGATTTTTGGAGATTTGAATCCTA  
TCCAGTATATTAAAAAACATAATCTTCCACAAGTGACCTTCCACTAATATCTCAAATCTAC  
TTTGATAAACAAAGAGAAGAAAATAGACAAGCAGCACTCCGAAAACATAGTTCCAGAGAATT  
GCTTTATAAAAAGTAGGTCTTCTTCCCTTTCACTTTTCTAGTAACAACCTTATTGGCAAACAAGG  
ACAATTTCTATAACATCCAATAATGGTTCTCAACCCAGGCGAAAAGTTTTCTACTGGATCATCT  
TCATCTAAGTCATCGATCGAAATAAGAAGAGCTCTCAAGGAGAATATTGATACTAGCAATAA  
CAGCAATTTCAACAGCCCAATTCATAAAATTTATAAAGGAATTTCCAGAAATAAAGATTCCG  
ACTCCGAAAAAAGAGAAGTACTGCGAAACATAAGCATAAATGCAAATCACGCTGATAATCTC  
CTTCAACAAGAGAATAAGAGACTAAAACGATCATTGGATGATGCAATAACGAATGAGAATAT  
AAACAGTAAAAATCTAGAAGTATTTTTACCATCGACCTGCTCCAAACCTCCAGTCACCAAGA  
AAGTTGAAATTGTTGAACCTGCAAAGTCCGCTTCTTTATCGAATAATAGAAATATAAATTACA  
GTAATGACTCCAGTACGAAAAAATAGAACTTTTTGGGTAGAGGTGGATCCTCCAGAGTTTTA  
CAAGGTGAAAGGATCTGGCAATAGGGTATACGCGCTCAAAGGGTGTCTTTTGACGCTTTTG  
ACGATTC AAGTATTGATGGATTCAAAGGAGAAATAGAACTTCTGGAAAAATTGAAAGACCAA  
AAGCGTGTAATCCACTACTAGATTATGAAATGGGGGATGGTTTTATTGTATTTGATAATGGA  
ATGTGGTGATCATGATTTGTCAAAATCCTTAACCAAAGAAGCGGCATGCCACTGGATTTTA  
ATTTTGTTAGATTTCTATACAAAGGAAATGTTGCTGTGCATTAAAGTAGTTCATGATGCGGGC  
ATAGTTCATTCGGATTTAAAACCTGCAAATTTGTTTTAGTGAAGGTATCTTAAAAATCAT  
TGATTTTGGTATAGCAAACGCGGTACCGAACATACGGTGAATATATATCGTGAAACTCAA  
TTGGGACTCCAAATTATATGGCACCAGAAGCACTAGTTGCTATGAATTACACACAAAATAGT  
GAGAACCAACATGAGGGAAACAAGTGGAAAGTGGGGAGACCATCTGATATGTGGTCATGCGG  
TTGTATTATATATCAGATGATTTACGGGAAACCCCATATGGCAGTTTCCAAGGCCAAAATA  
GGCTGTTGGCTATTATGAATCCTGATGTGAAAATCCCATTTCTTGAACATACTAGCAATAAT  
GAAAAGATTCCAAAGTCTGCCATTGAATTAATGAAAGCATGTCTGTACAGGAACCCAGACAA  
AAGATGGACTGTGGATAAAGTCCTGAGTAGCACTTTCTTCAACCTTTTATGATATCCGGAT  
CGATTATGGAAGACCTTATTAGGAATGCCGTTAGATATGGCTCTGAGAAGCCTCATATATCA  
CAAGATGATCTCAATGATGTGGTAGACACTGTTTTAAGGAAATTTGCAGATTACAAAATTTA  
G

>YDL178W 0.8 Cold

ATGCTAAGAAACATTTTGGTGAGAAGTACTGGCAGCAATTTCAAATTTGCTGGCAGATATAT  
GAAATCATCAGCTCTTTTAGGATACTATAGAAGAGTTAACTATTATTTCGACCAAGATACAAA  
CCAGACTGACTAGCGAAAACCTATCCAGACGTGCATCGAGACCCTAGATTCAAAAAATTAACG

TCCGATGATCTAAATTATTTTAAATCTATTTTATCGGAACAAGAAATATTAAGAGCCAGCGA  
ATCAGAGGATCTTTCATTTTATAATGAAGATTGGATGAGAAAGTACAAAGGACAGTCCAAGT  
TAGTATTGAGACCTAAGTCAGTGGAAAAAGTTTCTTTAATCTTAAATTATTGTAATGATGAA  
AAAATTGCCGTTGTCCCACAAGGCGGTAACACGGGGTTGGTAGGTGGTTCGTGTGCCATTTT  
TGATGAATTAATCTATCTTTAGCAAATTTAAACAAAATAAGAGATTTTGACCCTGTATCAG  
GTATCTTGAAGTGTGATGCTGGTGTAACTCTGGAAAAATGCTAACAATTACGTAATGGAACAA  
AATTATATGTTTCCGTTGGATCTGGGAGCTAAAGGTTCTCGCCATGTTGGTGGCGTGGTTGC  
AACCAACGCTGGAGGACTAAGGTTATTGCGTTATGGCTCACTACATGGAAGCGTTTTAGGCT  
TAGAGGTGGTAATGCCCAATGGTCAAATTGTTAATAGCATGCATTCCATGAGAAAAGACAAC  
ACCGTTATGATCTGAAACAGCTGTTCAATTGGCTCAGAAGGTACTATCGGTATCATCACTGG  
TGTTTCAATCTTGACTGTTCTAAGCCAAAAGCGTTTAAATGTATCTTACTTGTCTGTTGAAA  
GTTTTGAAGACGTTCAAAAAGTCTTCGTGAGAGCCAGGCAAGAATTATCTGAGATTTTATCC  
GCTTTTGAATTTATGGATGCTAAATCTCAAGTATTGGCCAAGAGCCAATTGAAGGATGCTGC  
CTTCCCTTTGGAGGATGAGCATCCATTTTATATTCTTATCGAAACGTCAGGGTCAAACAAG  
ATCACGATGATTCCAAACTTGAAACATTTTTAGAAAACGTCATGGAAGAGGGCATAAGTAACG  
GATGGTGTAGTGGCACAAGATGAAACCGAACTCCAAAACCTGTGGAAGTGGAGAGAAATGAT  
TCCAGAGGCAAGTCAAGCTAATGGTGGTGTTTACAAATACGATGTTTCTTTACCACTAAAGG  
ACCTATATTCTTTGGTTGAAGCCACTAATGCAAGACTTTCTGAAGCTGAATTAGTGGGTGAT  
TCGCCCAAACCAGTGGTGGGCGCCATTGGATACGGTCACGTGGGTGATGGTAATCTACACTT  
AAATGTTGCAGTTAGAGAGTACAACAAGAACATTGAAAAGACTTTGGAACCATTTGTCTACG  
AGTTTGTTCCTCAAAACATGGTTCGGTTAGTGCCGAACATGGGCTAGGTTTCCAAAAGAAA  
AATTACATTGGCTATTCTAAGAGCCCGGAAGAGGTCAAGATGATGAAGGATTTGAAGGTTCA  
TTATGATCCTAATGGAATTTTAAACCCTTACAAATACATTTGA

>YBR274W 0.82 Cold

ATGAGTCTCTCGCAGGTGTCACCTTTACCCCATATCAAGGATGTTGTTTTAGGAGATACAGT  
AGGCCAAGGCGCATTCGCCTGCGTTAAAAATGCTCATCTTCAAATGGATCCCTCCATTATTC  
TAGCTGTTAAATTCATTCATGTTCCCACCTTGCAAAAAATGGGACTCAGTGACAAGGATATC  
ACAAAAGAGGTTGTTTTGCAATCGAAGTGTCTAAGCATCCTAATGTTTTGAGACTTATCGA  
TTGTAATGTCTCTAAAGAATATATGTGGATAATTCTGGAGATGGCAGATGGTGGTGTATCTAT  
TTGATAAGATTGAGCCTGACGTTGGAGTTGATTCCGACGTGGCCCAATTTTACTTTCAACAG  
CTCGTTAGTGCTATTAATTATCTGCATGTAGAATGTGGAGTTGCTCACAGAGACATCAAGCC  
TGAAAACATCTTACTCGATAAGAACGGAAATCTGAAGCTAGCTGATTTTGGGCTCGCCTCTC  
AATTTAGGAGGAAAGATGGTACATTACGTGTATCCATGGATCAAAGGGTTCTCCACCCTAC  
ATGGCTCCTGAAGTATTATATTCTGAAGAGGGTTATTACGCAGATCGAACAGATATATGGTC  
TATTGGCATCCTCTTGTTTCGTATTGTTGACTGGTCAAACGCCTTGGGAATTACCTTCATTAG  
AGAACGAAGATTTTCGTCTTTTTTTATTGAAAATGATGGAAATTTAAACTGGGGACCCTGGTCA  
AAGATAGAATTTACTCACTTGAACCTACTCCGAAAAATTTTACAACCTGACCCAAATAAGAG  
GGTGACATTGAAGGCTTTAAAGTTACATCCTTGGGTATTACGTGAGCTTCAATTTCTGGGG  
ATGATGGTCTCTGTAATGACCCTGAACCTTGGCTAAGAAACTGTTTTCTCACTTAAAAGTC  
TCACTGAGTAACGAAAATTATTGAAATTCACCTCAAGATACAACTCTAATAATAGGTACAT  
TTCTACTCAGCCAATTGGTAACGAATTGGCTGAGCTTGAACACGACTCAATGCATTTCCAGA  
CAGTTTTCGAATACACAACGTGCATTTACCTCGTATGATTCAAATACGAACATAATAGCGGA  
ACAGGTATGACACAAGAGGCTAAGTGGACGCAATTCATAAGCTATGATATCGCTGCCTTACA  
GTTTCATTCTGATGAAAATGATTGTAATGAATTAGTAAAACGACATTTACAATTTAATCCGA  
ATAAATTTACCAAGTTCTACACGTTGCAACCTATGGATGTTTTGTTACCGATTTTGGAGAAA  
GCCTTGAATTTATCACAAATTAGAGTAAAACCCGACCTTTTGGCAATTTTGAAGATTTGTG  
CGAATTATTGGGTTATGATAACGTTTTCCACTTATTATAAATATTTAAAACCAAAGTAATG  
GGGTTATCAATTATGCGGTAGCATTTCCATCATAAAGATTGAAGAAGAGTTGAAAAGTGTG  
GGATTTGAAAGAAAACCTGGTGTATCCTTTAGAATGGAGAAGATTGTTCAAGAAAATTTCAAC  
TATCTGTAGGGATATTATCCTAATTCCCAACTGA

>YNL258C 0.8Cold

ATGGAGTCTCTTTTCCCTAACAAAGGTGAAATAATACGCGAGTTACTGAAGGATCCTTTAAT  
ATTA AAAAATGACAGCAAAGGTCCAATGGCAGTGAGTTAGAACTTGATTCTAGTGACCTAC  
TACAACGCGAGGCAATTCTAGCCAACGAACCTAGATAAATTTGAAGACGTTTTTA  
AATCTCATAAAAAGATTAAAACCTAATTTGAACATACTAGAACTAGAAAACCTGCTACTATTC

GTTGCAGTCATTGCGAAAAAGATGCGTAATAATGCTGCTTATCTTAAGCAAAGCTTTAATT  
TCCAGCAGTCCATTTCTACCTACGTCGACACACTGCATTTAGAACTTGTGAGCAGGTTGTAT  
AAAATTTCTACTAATGGATTTTGGGAAGATTACCGAGAATAGCATCCAATTTACGCCACAGT  
GGAATGGGGTAAAGACAAGGTTTCATATTGAGTATGATACATTTATGGATTTTGTGGCCCAAC  
AGTATTTTCTAAGGGTAGTTTGGACAATCAAGCTTGGTTCATTTTAGATATGACCAGTGCC  
GACTCTCAAGAGCAGGTAAGAGCAAATTTGAATACAATCATGAAGGAGTATATGAACCTTTC  
CAGGATTGTAAGCATGATCAAAAATTTCTATTTTATATCTGGTAAAGAAAATCTCATATGAAA  
ACGAAAAAACATACTTGTCTTTTCTAAATCCTCTTCGCATGGCCAACATTTGTGTGTCTACT  
GTATTAACAAGTTTGAAGCAGTATGCGATTTTCATGTTAGACGGATTAGCCTTTAGAGACAG  
AAAGACCTTAAGTTATGAGCTAGGTCCCTTGTTCATAACGGAGTTTACCAAATTTGTGAAAA  
ATAATGCATCGATAATTTTAGAATCACTTGATTCACCGCTAAAAAATCTAGTTTCTGTGATA  
AATAACAACTAACTAGACTAGTTGCCAAATCAGAAGTTACCAATTGGACACATTCGGGTAA  
AGAGATTCAGGATTTGTTAATGAACAAACAATTATACTACAATTTATTACTAGATAAAGTTC  
TTGAATCGCATATTAGTGAGATAAGAAGTATATTTGAAGATCCAAAAAAGAGCTGGCAAAAT  
TTGGAAGTAGTTGAGCTCACTACTAGCAATACTAATACGATGAGCGAAAAAATTGGAAAAA  
TGATTCAGATGTACAGAACGAAAAAGAACTCCATAATGCCGTATCCAAAGATGATGATTGGA  
ATTGGGAAGTAGAGGATGATGATGCCGATGCATGGGGTGATGAAATTGATGTAAATATTGAC  
GACGAGGAAGAAAAACAATCAAGAGAAGGAAAAAGAACCAGAAGAAGAAGAAAATGCCTG  
GGATGAAGCCTGGGCAATTGACGAAAAATATAGATGATGCTTCCCTAGAAAATGGAAAGGAAC  
ATTTAAAAGCTCATGATGTAGGATCACTTGATAAAGACCACATTGAAGTTACACAGTTACCA  
AAATTTGTTCTTGGCAATTTACAGAATTTCAAGAGTAGCTTTGCAGATAGCCATGTTGATGA  
GCAATACTTTGCGTACAAATACAACCTTTTGCAGACATCGTATATGGCCATGTGCACAGCTA  
ATTTTTCTCACAAATGGTGCCAAATTATATGTGGATATGAGATATCTAATAGAACGAGATGAA  
AAGCTGTATAGAATAAAAAGAAATTAACAAGGAACCTGCTGGAACTAAACTGAACATGAAATA  
TCGTATTGTCTGTCAACTAATCAGGCATCAATTGACCGAATTTTCGTGAGAACGAGAGAAATC  
CATCGTGGGACGCCACCATTGAGAACTGCTACCTTATATCTTGAAGGAAATTTGTTTCGTCCA  
CTGCAGAAAATAAGAGGTGAAGAAGGTTCCCGTTACTTGTGTTCTTTCTTAAACTTTTTTATA  
TAACGATTGCGTGACAAAGGAAATATTAATAATGGCAGATTATCTCTGAGGTCAATTCGAAA  
ATTTGGGTGAGCTCGTATCTTTATTAGTGAACAACACCGATATACAATTTATTAGCGAAGGAA  
CCAAGTTACAAAAAGATGAGAGAAAAATTCGCCACTATGGGCAAGTTTCTACCATTACATTT  
AAAGGAGATTATGGAGATGTTTTACAATGGGGATTTTTTATCTTTTTGCGACAGACGAACTAA  
TCCAATGGATAGAGTTATTGTTTGCCGACACTCCCCTGCGAAGGAATGCCATTGATGATATT  
TACGAAATTAGAGGCACTGCTCTAGATGATTAA

>YJR158W 0.72 Cold

ATGGCAAGCGAACAGTCCTCACCAGAAATTAATGCAGATAATCTAAACAGTAGTGCAGCTGA  
CGTTCATGTACAGCCACCCGGAGAGAAAGAATGGTCAGACGGTTTTTATGACAAAGAAGTCA  
TTAATGGAAATACGCCAGACGCACCGAAGAGAGGCTTTTTAGGTTACCTTATTATCTACTTA  
CTATGCTATCCTGTATCCTTTGGCGGTTTTTTACCTGGTTGGGATAGTGGTATTACTGCAGG  
CTTCATCAATATGATAACTTTAAAATGAATTTTGGTTCTTACAAGCACAGTACTGGTGAGT  
ATTATTTGAGCAACGTGCGTATGGGTCTTCTCGTGCCATGTTTCAGTGTAGGATGTTCCATT  
GGCGGTGTTGCTTTTGGCAGACTTGCTGATACTTTAGGTAGAAGGCTAGCAATTGTAATCGT  
GGTTTTGGTATATATGGTTGGTGCAATTATTCAGATCAGTTCGAATCACAAATGGTACCAAT  
ACTTTGTCGGTAAGATCATCTACGGTCTTGGTGCTGGTGGCTGTTTCGGTGTGTGTCCAATG  
CTTTTATCTGAAATAGCCCCACAGATTTGAGAGGTGGACTTGTCTCATTTGTACCAACTTAA  
CATGACCTTCGGTATTTTCTTGGGTTATTGTAGCGTTTATGGAACAAGGAAGTATAGTAATA  
CTGCGCAATGGAGGATTCCTGTGGGACTATGCTTTCTGTGGGCTCTAATTATCATCGTTGGC  
ATGTTATTAGTTCAGAGTCCCCAAGATATCTGATTGAATGTGAGAGACATGAAGAGGCTTG  
TGTCTCCATCGCCAAGATCGACAAGGTTTACCAGAGGATCCATGGGTACTCAAACAGGCTG  
ATGAAATCAACGCCGGTGTCTTGGCCAAAGAGAACTAGGGGAAGCCTCATGGAAAGAACTT  
TTCTCCGTCAAAACAAAAGTCTTCAACGTTTGATCACAGGTATTCTTGTGCAAACCTTTTT  
GCAACTTACTGGTGAAAACCTACTTCTTCTTACGGAACTACCATTTTTCAAATCAGTTGGGC  
TTACTGATGGGTTTGGAGACTTCGATCGTCTTAGGTACAGTGAATTTCTTCTCCACTATTATT  
GCTGTTATGGTCGTAGACAAAAATAGGCCGTGTAATGTCTGTTATTTCGGAGCGGCTTCAAT  
GATGGCTTGTATGGTCATATTTGCAAGTATCGGGGTAAAATGTCTTTACCCTCATGGCCAGG  
ATGGTCCATCCTCGAAAGGTGCAGGTAATGCCATGATTGTGTTACATGCTTCTATATATTC  
TGCTTTGCAACGACATGGGCCCTGTTGCTTATATTGTGGTTGCCGAGTCATTCCTTCGAA

GGTCAAATCTAAAGCAATGTCAATTTGACTGCATTCAACTGGTTATGGCAATTCCTTGATTG  
 GTTTTTTACACCATTACTACTGGGTCTATCCACTTCTATTATGGTTATGTGTTCTAGGT  
 TGTTTGGTTGCTATGTTTTTGTACGTTTTCTCTTTTTACCAGAAACAATTGGTCTATCTTT  
 GGAGGAAACCCAGTTACTATATGAAGAAGGTATAAAACCATGGAAATCTGCATCTTGGGTAC  
 CACCCTCAAGGAGAGGAGCTTCTTCCAGGGAAACTGAGGCTAAGAAGAAAAGCTGGAAAGAA  
 GTTTTGAAGTTCCCAAAGAGTTTTAATTGA

>YOR094W 0.78 Cold

ATGGGCAATTCATTTTCGAAGGTTCTGGGAAAACATTTGGCTCGAAAGAAATGAAAAATTTT  
 GATGCTAGGCCTGGATAAGGCTGGTAAGACAACAATATTGTACAAACTAAAATTAATAAAA  
 TAAAGACGTCTACTCCCCTGTCGGTTTTAACGTGGAAACCGTTACTTATAAAAACGTAAAA  
 TTCAACATGTGGGATGTAGGAGGACAACAAAGATTGAGACCTCTCTGGAGACATTATTTTCC  
 AGCCACCACCGCACTTATCTTTGTGATAGATTCTAGTGCTAGAAACCGTATGGAAGAGGCCA  
 AAGAAGAGTTATATAGTATCATAGGTGAGAAAGAGATGGAGAATGTAGTACTGCTGGTATGG  
 GCAAACAACAAGATTTGAAAAGATGCAATGAAACCTCAAGAGGTTTTCCGATTTTTTAGAACT  
 GGAGAAAAATTTGAAAACCAACCTTGGTGTGTCATCGGTAGTAACGCCTTATCCGGACAGG  
 GTCTTGTGAAGGATTATCCTGGATTTTGAACAACACAACCGTTCCAAAGAAATAA

>YER025W 0.76 Cold

ATGAGTGACTTACAAGACCAAGAACCTAGCATTATTATCAACGGTAATTTGGAACCAGTTGG  
 TGAACCAGATATCGTTGAAGAAACGGAAGTTGTAGCTCAAGAAACACAAGAAACACAAGATG  
 CTGATAAGCCAAAAGAAGAAAGTCGCCTTCACTGGCTTGGAGAAGACGGGGAAACTGAAGAA  
 GAAAAAAGGAAAAGGGAATTTGAAGAAGGTGGTGGTTTGCCCGAACAACCATTAACCCCTGA  
 TTTTTCAAATTAACCCACTATCCGCCGAAATTAACAAGGCAAGCTACAATAAACATCG  
 GTACCATCGGTGATGTCGCCACGGTAAATCCACAGTAGTTAGGGCTATTTTCAGGTGTCCAA  
 ACAGTCCGTTTTAAGGATGAATTAGAACGTAACATTACTATTAAGTTAGGTTACGCTAATGC  
 TAAAATTTATAAATGTCAAGAGCCTACATGTCCGAACCTGATTGTTATAGATCATTCAAAT  
 CTGATAAAGAAATCAGTCTAAATGTCAAAGACCAGGTTGTCCGGGGCGTTACAAATTTGGTC  
 CGTCACGTTTTCTTTTGTGACTGTCCCGGTACGATATCTTAATGAGTACTATGTTATCAGG  
 TGCTGCTGTTATGGATGCTGCGTTACTGTTGATTGCAGGTAATGAATCTTGTCCACAACCTC  
 AACCTCAGAGCATTTAGCTGCCATTGAAATCATGAAATTAAGCACGTCATCATCTTACAG  
 AATAAGGTCGATTTAATGCGTGAAGAAAGTGCCTTAGAACACCAAAAATCCATCTTGAAGTT  
 CATCAGAGGTACCATTGCTGACGGTGCTCCTATTGTACCAATATCCGCTCAGTTGAAGTATA  
 ACATCGACGCAGTTAATGAATTTATTGTCAAGACTATTTCCGTACCACCAAGAGATTTTATG  
 ATTTCTCCAAGGTTAATTGTTATTCGTTCAATTTGATGTTAATAAGCCAGGTGCTGAAATCGA  
 GGACCTGAAAGGTGGTGTGCGGGTGGTTCTATTTTTGAATGGTGTTTTCAAATTAGGTGATG  
 AAATGAGATTAGACCAGGTATTGTCAACAAGGATGATAAGGGTAAAATTCATGTAACCA  
 ATCTTTTCTAACATTTGTCTCCTTATTTGCCGAACAAAATGACTTGAAGTTTGTGTTCCCGG  
 TGGTCTGATTGGTGTGTTGGTACTAAAGTTGATCCTACCTTGTGTAGAGCTGATCGTCTTGTG  
 GTCAAGTCTGTCGGTGTGTAAGGGTCAATTTGCCAACATTTATACTGATATCGAAATCAACTAC  
 TTTTGTGCTACGTCGTCTATTAGGTGTCAAAACAGATGGTCAAAGCAAGCCAAAGTCAGAAA  
 ATTAGAGCCAAATGAAGTTCTTATGGTCAACATTTGGTTCTACCGCTACGGGGGCTCGTGTGG  
 TTGCCGTTAAAGCTGATATGGCAAGATTACAGTTAACGTCGCCCGCTTGTACTGAAATTAAC  
 GAGAAGATTGCTTTGTGTCGAGACGTATCGAAAAGCATTTGGCGTTTGATTGGTTGGGCAACCAT  
 TAAAAGGGTACTACATTGGAACCCATCGCTTAA

>YJL180C 0.75 Cold

ATGCTGCCATCATTAAGGAAGGGATGCTTCATTGTGAATTCATAAGATTGAAACTGCCCCG  
 ATCTACTCATTAATGCCAGCCACTGGGGACAGACAACACGATTGAGAATAACACTCCTA  
 CGGAAACAATAGATTGAGCAAACTTACAGAAAGTTTTGGGAAAAGGTGTCACTAAATAGG  
 GATGTTGAGAAAGGAAAGATTGCTCTACAATTAGATGGCAGGACTATAAAAACCTCCTTAGG  
 AAATGGAATTATAGTTGATAATGCAAAGTCTCTCTTAGCATACCTATTAAAAACCTGGAGTGGT  
 CGTCCCTATCCAGTCTTTCCATCAAACTCACTCTTTGCCACTAACTTCATTAGTGGCAAGA  
 TGCATAGATTTACAATGACAAATGAGCCTGGCTGTGACCCCAATTAGTTGCAAAGATTGG  
 AGGCAACAGTGATGTTATAAAAAATCAGTTGTTAAGATATTTAGATAACCGATACTTTATTGG  
 TCTTTTCCCCTATGAATGAGTTTGAAGGAAGATTACGCAATGCGCAAAATGAGTTATATATA  
 CCCATCATCAAAGGAATGGAAGAGTTTTTACGCAACTTTTCATCCGAGTCTAATATTCGACT

ACAAATTTTAGATGCCGACATCCATGGGTTACGAGGCAATCAGCAGTCGGATATCGTTAAGA  
 ATGCAGCAAAAAATATATGAGCAGCTTATCACCATGGGATCTTGCAATTTGAAAAAACT  
 GTATTAACCACAAAGTCCTTCATTTGCGGCGTGCTATTATTAGAAAATAAAAAAGATACTGC  
 GAACTTAATTCCCCTTGAAAAGTATGATAATATTGTACGTGCCGCCACCTTAGAAA  
 CAATCTTCCAAGTTGAAAAGTGGGGAGAGGTTGAAGATACTCATGACGTTGACAAAAGAGAC  
 ATCAGAAGAAAAATTCATACTGCTGCGATTGCTGCTTTTAAGCAATAA

>YLR154C 0.78 Cold

ATGACCAAAGATGCCGTGAATCTAGATGCTTACACCGTGAGCTTCATGCCTTTCTATAACCGA  
 GTATCAAGGACCAACCGAAGAGTTTAAGGATTACAAATTCGAAGATACTATTTACTTTTCGTG  
 GCAAGGAACTGAAGAGGGAAAAGTCTGCGACGCCTTCCAGTAGCGATAACACAAGTAGTAAT  
 ACCTTCAGTAATGGCGCCATCCTCTCGGGAAAACACAATAACTGGCAAGATAGTTTCAGTGAA  
 TAATTACGAAAAGAGAGGGCACTGATCGCAACGAATTGGCGCGATTGCAAGAATTGATCTCCC  
 TCATCGATGTCATAAATCAGTAA

>YJL215C 0.78 Cold

ATGGTTAGCGATGATATTCCGTCGTCCAAAAGATTACGACCATGCCAGTTCATATTATTTTA  
 CTTAAGAGTTTTCATGTCTTTTCATGCGAAGAAGCGTTCGAAAATTCAAAACCTTTAGAGTTC  
 AGGAACAGGCCCGGTGCGGGAATTAATCTCGGGATAAATCCAGCCGCTTGGCAGGTAGGCTA  
 AATTACACATTTCAAGAACTTTCTCCGGCCTTTTCTGTGAGATACGTTTATAAGTTGCTGCA  
 GCAGGATGCTCTAGGCTGCTTTCTCTGGAATTTCTCTCCTTCTCCACATACCTCGTTGTTGA  
 ATCCCCGCGGAGGTGATATAATAAAGTTGCGTGAAAGCGTAAATGCCTAG

>YDL117W 0.79 Cold

ATGGCCACTAACTTAACATCTTTGAAGCCACCATTTAAGGTGAAGGCCAGGTATGGTTGGTC  
 GGGCCAACTAAAGGCGACTTAGGCTTTCTGGAGGGAGATATTATGGAAGTCACAAGGATTG  
 CCGGTTCTTGGTCTACGGCAAGTTATTGAGAAACAAAAAATGTTCTGGGTATTTTCCTCAT  
 AACTTCGTCATACTATTAGAGGAGAGATTAATTCGAGCACTGAAAATGGTAGGCAACCTTC  
 AAAAATAGTAGAAAAGTTTTGAAAAATCAAATAAAGTTGTTATTCCACCAGTACCATCAAGGT  
 ATTCTGACGAGAGGCCAAGGCCAAAAAGAAAGCTATCTTCATCAATGCCCAATTCACCCAAG  
 AAGCCGGTAGATTCTTTGACAAAGGCTAGAAAGGCAAAAATCAAAGAAATGGTAAATGAAAA  
 AAATATCTATAATACCCAATCCTCTCGACATCATAATAACTCAGCTCCAAATTTACCTTTGG  
 CTAGCCATAGTAAGCCTCAAGTACGAAATTTGAGGAGTCCATGAACAATCCGTTACCACCT  
 CTACCGCCACTACCAGATTTGGACAATATGAGAAAGACAGATAAAAGGGCACCAAAGAAATC  
 ATATTCTGCAAACGATTTACATATGGCACGTTCTTCAAGAGAATATAACTATTACAAAGACA  
 ACCAGAAATCTATGATGGGTTTATCCCAGAAAAGAGATATTCTTTAGAAGAGGACTCTATT  
 TCATCAGGCCTGTTTTCAAACCTCTCAGTACTTAAATGATTCTGCTTGTAGTAGTGAGAACAG  
 TTTTGCCTTAATGAGTGATTTTAGTGCCACGAGCGGGAAGTTTCGCCAGACATAAATATG  
 CACAATCGTTTTCCGATTCATTGCAAAGATCACAGAATGCAAATGGCTGCTCTACAAAGATA  
 AATGATTACAGGAGTTTGGTGATTCCAATGCTAGTTCGAGAAATGGAAAAATGGGTGATAT  
 CCTTAGGAAAATAATTATTCCAAAGAGGAATACAAATATTTACTCCAGTTCAGTATCCTCAC  
 CAAAGTCACCAAAGCATATCCTAAACTACCAGATATTGAGAATTTAACTTGTCTGCAACA  
 CCCGATGAAGCTCGCGATTGGATTGCGGTAATAATGTCACCTGAACAGAGCAAGGACTCTTAC  
 CAAATATGACAAACATCCGAGGTATATGAGAGCTCTCGAAGAAAATCGCGACTTGATCTTAC  
 ATCCTCAAGATTCGATTTATAACGGGCTAAATACCAATGAAGTCAAAGGTAATACAAAGCCC  
 GGTGTTGGTCGATGTGGAAGTGGCCGAATTAACATAGAATACATTGATAAGATGACTTGGA  
 ACGGTGTATTAGAGACGGAACATGACATTAGACAGTTGGGCTCAAACAACCTTTTTTCAGCAA  
 GATACTCAACTGTTCTGGAAAAGTTAAGAGGCATATACATTTTTTGCACAGAGATGTTTGCT  
 CTGACTGATGATAATGGAACGTCAGATTTTTCTGCGGAACCCCAAAATTTAGAGAAAATACT  
 ATACAGAAAGCATGTACGCCATATGAATTGACATGGCTTTTCAAGAAATTAGCAAACCTCAT  
 TGGGAATCACTTGTGAAATTTATAGGTTTCCGAAAACACCGAGTGTATAAATTTGGGAG  
 TTTAAGTATAACCCTGCTGGTTGAGAATACTGGTTAACAAAGAATGGAGATTTATTGACGT  
 TATTTTAGGAAATGTAACCAACCCAATTCATGAATTTGTAAATAACAGAAAGATCAAGAAAG  
 CAGAAAATAGCTACTTTTTGATGGCACCATTAGAAATGATATACACACATATACCGCCTAGG  
 GAATTTGAGCAGCATATTGTTCCTAGTATCGATCAATTATCTGCATTGTATCTGCCATTAGT  
 TTTTCCATCTTTTTTCAAAAATGAGTTAAAGTTATACAAATTTAGTACTGCACTATCATTTT  
 TGGAAATTTCTGAGATCTACGAATGCTCCTTAGAAATTTCCAATGACGTTGAAGTCTTTGCA

TCCGTGGTTATTCCAACGGATAATGAAGAAGCTTCATCTGCGTACAGGAATATGGAACTCGC  
 ACTGACCCAAATCAAAAAGCAGAAAGCCGAGTCTGGTAGAAGAATTGCTCTAATCAAAGCAG  
 TCCTACCACCCAATGTGAACAAAGGTTCACTGTACATACATTCAGGTGTAAGAGGTACGCAA  
 ACGAGTATTGCCAATATCCATCCACTGTCCATGATGGTCCCATTAACACATAAGGGGAAGTAA  
 CATGAAATACGAATTTGTGATCAAGATACCCTCAGAAAAGCATTGAGAAGATTGAGCTATACA  
 TTGTCGAGCCACAGAGTAGATATCTATTTGTTGGTAATGAGTACTCATTCGAAGTTATTCAA  
 AGTCCCTCCGATGGTATTGTATACAGCAGTGTGAAGGGCCGAACCAAAATAGGAAACAACC  
 AATGGCAATAAAATCACCTCAGGAAGAGTTCATGAGCTAGTCAAGAGCGATCCCCACTTTC  
 CTTATGGTACCTGGAAAGGAAGCATTAAATCAAAGAGCCCGGCGTCTGGAGCGCTTTAGTG  
 ATCGTGAATCTGGTATTGGGTGGTCCGTTTTTGTGTAATGGTGTGCGTATAA

>YOL138C 0.78 Cold

ATGAGCTTATCACACACGTAGAAAATGCTTCCATTCCCAAGGGGAGTACCCCGATACCAAA  
 AAACAGAAACGTTAGTTCTATAGGCAAGGGCGAGTTTCTTGGATCTTCGTCAAGCAACAATT  
 CTTCTTTTCGAATGAATCATTACTCAAATAGTGGACAACCTTCCGTGTTAGATTCTATACGG  
 CGACCTAATCTAACTCCAACCTTTTTCTTACAGTAATGGGGTTTATATGCCGTAAGTACAG  
 AACTAGTTCATTCAACGATAGTTATTTGCCATATGATAAGAATCCTTACGCAAAAACAACCG  
 GAAGCATGAGCAATAAATCGAACATGAAAATCAAAAAGAAAATGCAATCAACACAAT  
 ACAAGAAAGTCGTCGGACTCATTTACACCACCAAGTGGATAAAGAATTATCTAGTATAGA  
 CAAAGTGAATGATCCAAACATTAACGGTCTTGTGTTGTGCAGGTAAAATCATTGGGGCTCT  
 ATAAATTCTCGCCCTCAGATAGATCTATCAAATGCGTTCATGATTTCATAACACCTAATAGC  
 AACACCTCAACAAGGGGAACGACATCCCTTTTGCCCAAGCTGAGCAAAAAGAACAAGACAGAA  
 CAAATTTAGTACCATTGCGGATGTTAAGACTGGATTTAATAATTACAAGAAGTGTATTGCAG  
 TGTGCAACAATTCTACGGCGATATCGATATATGATCTCAATAAGAGTTCCTCGATAGACAAT  
 CCCTTGATAACATCCTTATGCGAACACACTAGATCTATCAATAGTTTTGACTTCAACATGGT  
 CGAATCAAACCTAATAATAAGTGGTGGACAAGATAGTTGTGTAATAAATATGGGATTTACGTT  
 CCAATAAATCTAAAAGCTCAAATAGATCTGACATTAGTATAAATACCGCATCTGACTCAATC  
 AGAGATGTAATAATGGATGCCCGTTACAATTTGTCATCTAAGAACGATCAAGGTTTCATCAAC  
 GTATGGTAATTTAAAAGCGGTTACAATTTGCTTCTATTCACGATTCGGGATACTTGCTAA  
 AGTTTGATCTTCGACAACCTGCCCAATACGAAAAAATTAATGCTCACACAGGACCCGGT  
 CTTTGTTTAATTTGGCATCCCAATCAAGAATACATTGCTACAGGTGGTAGAGACGGTAAATC  
 CTGCCCTCGGTTTGTGGCGACAATGCCAATGCCGCCGAAAATACAGTCCCAATTACGGGA  
 ACTCTCCCTCGTTACATGCCCCAATACGTCCTTGAACAATAGCGGCTCGCTGGCATTTCCTC  
 AAATAACAATTAATACGGGCTATCCAGTCACTAAATGAAGTTCAGGCTGCTTATAGTAG  
 TAATATATATAATTCACTACTAGGAATATCGTCAATGGGTGACGAAGCTGAAGTTCGCATCT  
 ATTCCTTGGAAGAAAGTACATTCCAAAACATGTTCTCCTATCAGAAACGCCTTCTTTAGGA  
 TTAGTATGGTGGGACGAAAACCTGATCTTTAATATCGATAAGGGGACCCGTATAAATGGCTG  
 GGACATTAACAAGAACCAACAGTGTGCGAAAATTTGAGCAAAAATACAACAACCTGGAGAG  
 ATTTGGATGGTAACGGTTTACTTTTCAGTTGGCCAAGAGATAGGCTCATATGAGGTGGTAGAA  
 CCGGAGCTTCAACCTACCTCAAGTACCACATGCAAGAAGCATCCAGGTACAATAAAAAACCC  
 GAAGAATGGCAATCCAGAGAACCAGGGAATAATTGGAGGGATAAAAAAAGGATTTAGCCATA  
 CTGGATTAACAAGTTTTACGCCAGAGAGGCCGCTACTTTAAAAGCAGGCCCAACGTTTAGC  
 AAAAAAGCTTAACATTAGCATCTGGAGCATCTTCTTTAACAGCTCTTCCGCATCATTGAC  
 ATCCCTGACGCCACAACTGAAAATAGAGAAGAAATCGCCATTGAACCGCCTTGTATCATCA  
 CTTTGGATATAACCGCAGATCTTCAATAACATAAGATTAACCAAAATCGCACATTCAAGAAAA  
 AAGAAGTCAATTCGGAAAGTCTTCTATGAAAATTTCTCCAGTAGAAAAGTTCAAATATTT  
 GCGAGACAGCTCAAGTTTTCGTATATTCGAGAGCATAATGTTTCAGACAGTGCAGACACTG  
 CATATAAAAATGATATAGAGAACATTGACGTCGTTAAAACGCAACCGAAACACATGGTGTAT  
 AATACTACTACTACCAATAATAATGATGATGGTGTATGATGATGATGATGATGATGATGATGA  
 CAAAATAATCGAAAGTCACTTTTGAAAAAATACAATTTTCCAGAAAATAATACATGGGCTA  
 CCTTAATGAATGAAAAGTAAATAACAAAAATCCAAAAGAAATTCAGTAGTTTCGAGGGAG  
 TTTGACGAGAAGGATGTGAGATCAAGTATATCTTCCATTTCTGCAAGTAGGCAAAGTCATGA  
 CAGAGCTAGGAAGATCGACAAGAACGTGGAAGCAGAACTGCAAGAAAAAATACAACACTGG  
 TAGATTTGATATCTATTGCAACGCATAACGCATCTGTTTATCTATCCATAGATGATCTAACC  
 AACTTCAAATCTGGATCTTGATAAGAGATTCATTGTTATGGGACTTGAAGTGGATGACCTC  
 CTCCCAAATTTTCATCAGATAACGCATCTAATATGGATGCCAATGAAAGCTCCGATTTCGAAG  
 CTGGAGAAAATCTGAAAACAGGAAAAGAGTCCCAGAGGAGGATGGTGCAGGGACAAGTGGG



GCTGAGTCGTTAGTTGAAGAAAGGCCGAGGCATTTTCGTGCTAACTCTGATGAACCAAGTGA  
 TGCCGAAAAGAAACCTGTTTCTAAGCTCAAAGAGCAGCTCAAAAACACGGAAATAATCCCCT  
 ATGCGCAGCCAAATGAGGATTCAGATGAAGTTTTAACTAAGCTAAAAGAGCTACAGAACC  
 CGCTTGGAGTCAAGGACTAAAAATGGGAGAAACAGTGAGTGACGATGTGATTATAGAGGAAGA  
 CGAACATGAACATCAAGAAGAAGAACAGCCTCATGACTCACCGACTAAGTCAGCACAATTTTC  
 ACGCGTCTCCTATCGCGAAAAGTATACCAATATTGCAGAAACGTGAGCACCAGCAAGTCATTC  
 ATAGATACTTTTCATGTTGCATTTCTCCAACGGTTACAATGGAGATACGGACATAGGTAACGA  
 AGATGACAATATATCTCCTAGGTTTACTTACAACAGCGTAAGCCACCGCAGTAAGGTTTCGT  
 CGCTACAAAGCTATGCCACAACAACCTCGCAACTAGAACTTTTAAAAAGCTTTCTTCCCAT  
 ACAGCACCATAATCGGTTTCGCCAGACATGCGCCATCACGGCCAGATAGCATTGGTAGGGA  
 ACAACTGTCTTCTTTCATTGACGAAAAGCTTGCCAAATGCAAGAAAATTATCGCTGACCAC  
 CCTGGGACACGAAAAAATCATCAAACAACCTTACAATCAAGCTACTGAGACTGGGAACGTC  
 GTATTGACGGTGAATATTTTATTTCTTTTCCAAACGATATACCAAATAACAGAAATCGACAT  
 TGCAAAGGACGCAATCGCTCACTTCTTGTATTATTACATCGATACGAACTCTTCCGGCATTG  
 CTGCAGACGCTTAAAATACTGCCATTCGAAGATATCATGGGTTCTGAGGGTGACCAATCT  
 TCCATTCGGTTGTTTTGCGAACGCTGTGGTGAGTTAATCACTAACGAAAAGTTCTAAAGAAAA  
 GCTCAGAGCGGAAGCTCAGCAGACGGGCAATAAGAAGATCATGGACAAGTTTGGATACTGGT  
 ATTTGTGACTCTTGTAAGAAGAATAACATCTTGTGTTCTATGTGAAAAGACCATTAAAGAAA  
 CTGACCATGGTCATCCTCCCTGTGGACACGAAGGTCACCTCCAGTGCATACAAGAATGGTT  
 TCTCGATGAGAATGAACAAGAATGTCCCGGCGGTTGCCCGGTTGTCATTCATCTAG

>YBL001C 0.76 Cold

ATGCCCAAGATCTTTTTGTTTAGCGGACGTGTGTATGGTCCCTATTGGCACCAGACTCTGCTAG  
 TATTTCTGATTTTGTGCACTCATTGAAAAAAAAAATCAGAGAAAGCCCATTAAAGAGCACTT  
 TACACAGTGCAGGAACAACAATTGAAGGGCCTTGGGATGATGTGATGGGTTTGATTGGCGAA  
 ATCCATGAATACGGTCATGAGAAAGGATATGTTAGAGTACACACTGATATTCGTGTTGGGAC  
 TAGAACTGATAAGCACCAAACTGCTCAAGATAAGATCGATGTTGTTTTAAAAAATTTCTC  
 AATGA

>YDR538W 0.76 Cold

ATGCTCCTATTTCCAAGAAGAATAATATAGCCTTTTTTCAAACAACAGGCATTTTTTGCTAA  
 TTTTCCTTTGCTAGGTAGAACCATTACAACCTCACCATCTTTCCTTACACATAAACTGTCAA  
 AGGAAGTAACCAGGGCATCAACTTCGCCTCCAAGACCAAAGAGAATTGTTGTGCGCAATTACT  
 GGTGCGACTGGTGTGCACTGGGAATCAGACTTCTACAAGTGCTAAAAGAGTTGAGCGTAGA  
 AACCCATTTGGTGATTTCAAATGGGGTGCAGCAACAATGAAATATGAAACAGATTGGGAAC  
 CGCATGACGTGGCGGCCCTTGCAACCAAGACATACTCTGTTTCGTGATGTTTCTGCATGCATT  
 TCGTCCGGATCTTTCAGCATGATGGTATGATTGTTGTGCCCTGTTCCATGAAATCACTAGC  
 TGCTATTAGAATCGGTTTTACAGAGGATTTAATTACAAGAGCTGCCGATGTTTCGATTAAAG  
 AGAATCGTAAGTTACTACTGGTTACTCGGGAAACCCCTTTATCTTCCATCCATCTTGAAAAC  
 ATGTTGTCTTTATGCAGGGCAGGTGTTATAATTTTTCTCCGGTACCTGCGTTTTATACAAG  
 ACCCAAGAGCCTTCATGACCTATTAGAACAAGTGTTGGCAGGATCCTAGACTGCTTTGGCA  
 TCCACGCTGACACTTTTCTCGTTGGGAAGGAATAAAAAGCAAGTAA

>YKR102W 0.71 Cold

ATGCCTGTGGCTGCTCGATATATATTTTTGACCGGCCATTTTTTGCTATCTGTAGCTAATGT  
 TGCTCTAGGTACTACAGAGGCTTGTGTTGCCAGCTGGAGAGAAGAAAAATGGTATGACTATAA  
 ACTTTTACCAATATTCCTTAAAAGATTTCATCTACATACTCAAATCCGTCATATATGGCCTAT  
 GGTATGCTGATGCAGAAAACTGGGTTCTGTAAGTGGGCAAACAAGCTTTCCATCGATTA  
 TTCCATCCCATGTAATGGCGCATCAGATACTTGTGCTTGTCCGATGATGATGCTACTGAAT  
 ATAGCGCTTCCCAGGTTGTACCAGTGAAGCGTGGCGTTAAACTTTGTTCTGATAATAACAAC  
 CTTTCTTCTAAAAC TGAGAAACGTGAAAATGACGATTGCGATCAAGGCGCTGCCTACTGGAG  
 TTCAGATCTGTTCCGATTCTACACAACACCCACCAACGTAACCGTGGAAAATGACAGGTTACT  
 TTTTACCACCAAAAAC TGGTACCTACACATTTGGCTTCGCTACTGTGGATGATTACAGCAATT  
 TTATCGGTTGGAGGTAATGTTGCCTTTGAATGTTGTAACAGGAACAGCCTCCTATCACATC  
 AACGGATTTCACTATTAACGGTATTAACCATGGAACGCAGATGCACCTACCGACATAAAGG  
 GGTCAACGTACATGTACGCCGTTACTATTACCCGATCAAAATGTTTATTCAAATGCTGTA  
 TCCTGGGGTACGCTTCTGTAGTGTGGTATTGCCAGATGGTACTGAGGTTAATGATGATTT

TGAAGGATATGTTTTTCTTTTGACGATAATGCTACTCAAGCTCACTGTTCCGTTCCAAACC  
 CTGCTGAGCATGCAAGAACTTGTGTATCATCTGCAACATCTTCCTGGTCGTCAGTGAAGTC  
 TGTACAGAGTGTACCGAGACCGAGTCTACCAGTTATGTGACACCATATGTCAGTACTAGCTCTTC  
 CTGGTCGTCAGTGAAGTCTGTACAGAGTGCACCGAGACCGAGTCTACTAGCACCTCTACTC  
 CATATGTCACCAGTCTTCCTCGTCGTCAGTGAAGTCTGTACGGAGTGCACCGAAACTGAG  
 TCTACCAGTTATGTGACACCATATGTCAGCTCGTCTACTGCTGCCGAAACTACACTAGCTC  
 ATTCTCATCGTCCAGTGAAGTCTGTACAGAGTGCACCGAAACTGAGTCTACTAGCACCTCTA  
 CTCCATATGTCAGTACTCTTCCTGGTCGTCAGTGAAGTCTGTACAGAGTGCACCGAGACC  
 GAGTCTACCAGTTATGTGACACCATATGTCAGCTCGTCTACTGCTGCCGAAACTACACTAG  
 CTCATTCTCATCGTCCAGTGAAGTCTGTACAGAGTGCACCGAAACTGAGTCTACTAGCACCT  
 CTACTCCATATGTCAGTACTCTTCCTCGTCGTCAGTGAAGTCTGTACAGAGTGCACCGAG  
 ACCGAGTCTACCAGTTATGTGACACCATATGTCAGCTCGTCTACTGCTGCCGAAACTACAC  
 TAGCTCTTTCTCATCGTCCAGTGAAGTCTGTACAGAGTGCACCGAAACCGAGTCTACTAGCA  
 CCTCTACTCCATATGTCACCAGTCTTCCTGGTCGTCAGTGAAGTCTGTACAGAGTGCACC  
 GAGACCGAGTCTACCAGTTATGTGACACCATATGTCAGCTCGTCTACTGCTGCCGAAACTA  
 CACTAGCTCATTTCTCATCGTCCAGTGAAGTCTGTACAGAGTGCACCGAAACCGAGTCTACAA  
 GCACATCCACTCCATATGCAACCTCATCTACTGGCACAGCTACTTCATTTACCGCTTCAACT  
 TCCAATACCATGACGTCTTTGGTCCAAACAGACACAACCGTTTCTTTTTCAGCCTATCTTCAAC  
 TGTAAGCGAGCATACCAACGCTCCAACCTCATCTGTAGAGTCAAATGCTAGTACTTTTCATAT  
 CGTCAAATAAAGGCAGCGTTAAAAGTTATGTTACGTCATCCATACATAGCATTACGCCCATG  
 TATCCTAGTAACCAACCGTAACATCTAGCTCTGTTGTCTCCACACCAATTACTTCCGAATC  
 TTCTGAATCCTCGGCCTCAGTTACCATTCTACCCTCAACTATCACTTCTGAATTCAAACCAT  
 CTACAATGAAAACGAAGGTCGTTAGTATCTCCTCATCACCAACTAATTTGATTACCAGCTAT  
 GACACTACATCTAAGGATTCAACTGTTGGTTCATCCACATCGTCTGTAAGCCTGATCTCTAG  
 TATTTCTCTACCAAGTAGTTATTCAGCTTCTAGCGAACAAATATTTTACAGCTCCATCGTTA  
 GTTCAAACGGTCAAGCATTAACAAGTTTTTCTTCGACCAAAGTCAGTTCCTCAGAATCTTCT  
 GAATCACATAGAACATCGCCCACTACATCCAGTGAATCAGGCATCAAATCTTCAGGCGTTGA  
 AATCGAATCTACAAGTACCTCTTCTTTTTCAGCTTTCACGAAACTTCTACAGCCTCCACCTCCG  
 TTCAAATATCTTCTCAGTTTGTGACTCCATCTCCCTATTTCCACAGTTGCCCTCGTTCT  
 ACAGGGCTCAATAGTCAAACCTGAAAGTACAAATCTTCCAAGGAAACCATGTCGTCGAAAA  
 TAGCGCCAGCGTTATGCCTTCTTTCATCAGCTACATCTCCCAAACAGGCAAAGTTACCAGTG  
 ATGAAACTTCTTCCGGATTTTCTCGTGATCGCACCACTGTGTATAGGATGACTTCAGAAACA  
 CCTCCACAAATGAACAAACAACCTTTGATTACTGTAAGTTCTTGTGAATCAAATAGCTGCTC  
 AAACACAGTCTCAAGTGTGTAGTTTCCACGGCCACCCTACCATCAATGGGATTACCCTG  
 AATATACTACATGGTGCCTCTTCTGCTACGGAATTAACAACGGTAAGTAAATTAGAGTCA  
 GAAGAAAAAACCCCTAATTACGGTTACTTCTTGTGAGTCTGGTGTCTGTTCCGAAACTGC  
 TTCACCTGCTATCGTTTTGACAGCCACTGCTACCGTCAATGATGTGCTTACAGTTTATTCCA  
 CATGGAGCCCACAGGCTACAAATAAAGTACGCGTTAGTTCTGACATCGAAAATAGTGCCAGT  
 AAGGCTTCATTCGTTTTGAGAGGCTGCTGAGACAAAATCCATAAGCAGAAACAACAATTTTGT  
 TCCAACCTTCTGGGACTACTTCTATTGAAACACATACAACCCTACAAGCAACGCGTCTGAAA  
 ATAGCGACAATGTTTCTGCTTCTGAGGCTGTCAGTAGCAAAAGTGTACAAATCCCGTGTG  
 ATTAGTGTATCTCAACAGCCTCGTGGCACACCAGCAAGTAGTATGATAGGATCTAGTACAGC  
 CTCTTTAGAGATGTCAAGCTACCTCGGCATTGCAAATCATCTACTAACCAATAGTGGTATTA  
 GTATTTTCATTGCCCTCCCTATTACTGGCAATCGTTTTAA

>YOR019W 0.81 Cold

ATGATTTCTGTTTGCCCAAAAATGACTTGCAAAAATGCTACAGAAGCCTCACATTCGATGT  
 TCCAGGACAACAATTCGAAGAGAGAAATGAACAAAACCTTAAAAACGGGCCAAAAAGAAAG  
 GCAGTTTCCAACCATCTGTTGCCTTTGACACAGTGCCTTCCACCGCTGGTTATTCTTCTATA  
 GACGACAGCAGGGAAGGATTCAAAGGTGTACCTGTTCCCAACTATTACACGATGGAAGAGTG  
 CTATGACGATGAAACAGACTCTTTTTTCGCCAAATTTGCAATATTATTTGAGAGATACATTC  
 AATCATCACCTTTTCTGAATACTAGAAAAGAGAACAAATCTGAATCCAGTAGTTTTCCAATG  
 AGATCCTCAAAGTTGTTGGAAAAGAATTCTGACATCAAAAAATATTTCTTGGTATCCAAGAA  
 TGGAAAATAGTGAGGAGAGACTATCCAAGCACGCCAGTAATTGTCAACGAAACGTTGATGA  
 TAAACAGGTTTGGAAAAGAACTGGATAAAGTTATGGCGCCAAAGAAAACCTACAATAAATGAA  
 AGGCTGAATGACAAAAAAAATGGTTTTACTTACCCAGAACTTATCTTCTCTGAAGAGCGTAT  
 TAAACCGTTATATAGAGGAGATGATAGTGCACCATGTACAAAAGAACAAAAAAGAAAGCATA

AAATACTTCAACAAAAGGTCCGATATCCCAATAACCCTAAGACAATAGTTTGTCCACATTAAC  
 GGAAAAAACATACGTGGGTTGCCCTAGACTGGACAGTCTACAAGTTTGCACGAAATCTTGA  
 TCACATTGTTGTCATAACTACACTGCCAAAAATGATTTCTAACAGGAAAAAACTGCAAAAG  
 ATGATACAGAATGGGCACCCGGATATCAAAAAGAAGTAATAGATCAAAAATTAACGACATT  
 TTTGATTATATTTTACAGCTAGTAAAAGTGGTCAAAAATATCCGTCAAAAATTACTTTAGAAAT  
 AATTGTAGGCAAAATTAAAAAAGTCTGGTAGATGTCATTAATGTCCATACTCCAGATTTCT  
 TAGTTCTTGCTACTTTAAAGCACGAGCGAAATGAGAATCTTATTACATATAAATCCAAAAAG  
 CTGACAGATGTCTTCCCTGTTAGTTATCCGATTTCCACATTTGTTGTTCCCTCGAAACGAAT  
 GTATTCGTTTGAACCTGAATCTACAAAGAGAAGTAAATGAACATTATGTCTCAAAAAATCATA  
 TGAAGCACGAACACACTGACGTTGAGAGCATGAGCAGTTCAATGTTCAAAAAAATACAATA  
 TCAGATATTTCTTCACATATTTCCGTAGATTCGTACGCCGAAGATTTCAAAAGGCAAGGCTA  
 CATCAAAAAGCAGTTCAACACCTCTAATGATTCCATTCCAAGAAAATTTGACCGGTCTCGCCC  
 AGCATTCAAGAAGGAAGATCACGGGTGATATAGAAAAATTACAAGACGATGAGAAAGATAGA  
 GAATGTACTAAGGAAAACTTTTGTGTAAGAAAATTGATATCATAATTAGAGAGTCATTGAA  
 GTCTTCTTTAGCGATAGAGACGTTGCCTGGTAAAAATGTATCGCAGTCCAGTACGGTGACC  
 AAATTTCCAGCTTTAAGAATGCTTTGATAGGCAATGGGTGAAAAACACAAAGTTTAGAAAA  
 TCTTTAATACCATATTTCTTCCCTCAGAGGAACAAAATACCACAACAACCTATTAAACTCAGTAG  
 CTCGCCTACGTCCCAAATCAAGTTTGAACCTCTGTAAAAACAAAGATGGAAGAGCCGCC  
 TTGGCAAAGCCAGAAATCTGCCTGATATAAGGCACAGTATTTCCCTTCGACAAAGAAAAATTC  
 TTTGATCCATCTGATAAAAGCAGTAGTGTGATAATAGCATTCCTTTGAGGAAAGTTAAAAG  
 TGCCGGTGCCTTAAGAAAAGTCAAACTAATGACTCCTCAAGTAGTGCAGGGTCAAAGAAAA  
 GCTCGTCTAGTTTTAGTACTGTGAACACCTTCACTGGGGTGGAGTTGGGATTTTTAAGGTG  
 TTTAAAAGTGGAAAGTTCCCTCTGAAATAAATCATCCAGTAGAAGGAATAGTAGCAGTGGCGA  
 TGTTTTTGAAAGTGATGATCGTAACGACAAGAAAAAGAAAGAAAAAAGAAAGAAATCAT  
 TGTTCCTTATTCGGCAAAATATGA

>YCL059C 0.8 Cold

ATGGTGTCTACACATAACAGAGATAAACCTTGGGATACGGATGATATTGATAAATGGAAGAT  
 AGAGGAGTTTAAAGGAAGAGGATAACGCATCCGGTCAACCTTTTGCTGAAGAGTCCAGTTTTA  
 TGACTTTGTTTTCTAAATACAGAGAAAGTTACTTGAAGACGATTTGGAATGATGTAACAAGG  
 GCTCTAGACAAACACAACATAGCGTGTGTTCTAGATTTAGTCAAGGTTCTATGACAGTAAA  
 AACAACTAGAAAAACATACGATCCCGCTATCATTTTTGAAAGCCAGAGATTTGATCAAATTAT  
 TGGCGAGATCCGTTCCCTTTCCCGCAAGCCGTTAAGATCCTACAAGATGACATGGCATGCGAC  
 GTTATTAATAATTGTAATTTTCGTTACTAACAAAGAAAGGTTTGTCAAGAGAAGACAACGCTCT  
 TGTAGGCCCTAACGGTAATACTTTAAAGGCTTTGGAACCTTCTAACTAAATGTTACATCTAG  
 TACAAGGTAACACAGTAAGTGCCATGGGTCCCCTCAAGGGCTTGAAGGAGGTCCGTCGAGTA  
 GTAGAAGATTGTATGAAAAATATTCACCCTATCTATCATATCAAGGAATTAATGATAAAAAG  
 AGAATTGGCAAAAAGGCCAGAGTTAGCCAATGAAGATTGGTCAAGATTCTTGCCCATGTTTA  
 AGAAGAGGAATGTGGCCAGAAAGAAACCCAAGAAGATCAGAAACGTCGAAAAGAAGGTCTAT  
 ACTCCATTTCCCTGCCCCAATTGCCTAGAAAGGTTGATTTGGAAATTGAAAGTGGTGAGTA  
 TTTCTTAAGCAAGAGAGAAAAGCAAATGAAGAAATTAATGAGCAAAAAGGAAAAGCAAATGG  
 AAAGAGAAATCGAAAGGCAGGAAGAGAGAGCAAAAGATTTTCATAGCTCCGGAAGAAGAAGCA  
 TACAAGCCAAACCAAATTAG

>YPL236C 0.82 Cold

ATGATTTCTATTGTATTGGAATTGTTCCAGAACTTGTGCTGCTGTGCGGATTTTCCGATGC  
 TACTATTAGGGTAAATGATAAACGATATAGGATTCAACGACTACTTGGAGAAGGTGGAATGT  
 CCTTGTGTATTTGGTACAACCTGTCAAAGAATTTCTCTGATTATAGACAACGGCATCGCAACA  
 CCAGAATTATACGCACTAAAGAAGATTATTTGTCTTAGTGTGGAAAGTATATCCAATGGTAT  
 GCGAGAAATTGAAAATTACAAACGGTTTCAAAGTCTTATGTTATAAAAAGTATCGACTCAC  
 AAGTAATGCAGGAAAAAGATGGGTCAAAAACAATTTACATAGTACTACCTATTATTCATTA  
 GGGAGTTTACAAGACTCTATTAATCGGAGGTTACTCGAGGGCACCTTTGTATCAGAGGCAGA  
 ATGCGTAAGGATAATGCTTGGAGTTACAAGAGGTTTACTTTGTTTACATGATCCTGCGTCAA  
 GACAAGATAACGCTACTTCCAGAGTAAATGTTCGATGCGGTTTCTATGACTTATAGCGATGAA  
 ACGGCGATGCTCCTAGAAGACACCCCTTAGAGATGGACATGCTTTCCCTCCAACCTCAGCAGG  
 TTCAATAGCATATGCACATCGCGATATTACACCTTCAAACATTTTGTCTCTTCAGACGGTT  
 TACCAGTAATTGGTGACCTCGGCTCCTGCTCTCAAGCTGATATAACAATGAAAACAGACAT

CAACTCAGCGAACTACAAGAATGGGTCAATGACAATTGTACGTTGCCATATACTCCACCAGA  
 ACTTCTGAACTTCAAATTAATCAGGTTTTGAGCTCTAAGGTTGATATTTGGTCTTTGGGTT  
 GTACGTTCTATACTTTAATGTTCGGTATCTCCCCCTTTGAGCGAGAAGAGCAGATACATGGA  
 GCTTCTTTAACCTACGCTATAAACACTGGTAAGTACAGTTTCCCGAGAAATTCAGATTTTC  
 TGAGGGGCTTTTGAGTGTAAATCAAGAAATGCATTCAAGTGGATCCTATACAAAGGCCTACTA  
 CCAGCCAATTATTAATCTTTTACAAGATTTAGACACTTGA

>YKL001C 0.82 Cold

ATGGCTACTAATATTACTTGGCATCCAAATCTTACTTACGACGAACGCAAGGCATTGAGAAA  
 ACAGGACGGTTGTACTATTTGGTTAACAGGTCCTAAGTGCCTCAGGTAAAAGTACAATCGCCT  
 GTGCGCTAGAACAGTTACTGCTCCAAAAAACTTGTCTGCATATAGATTGGATGGTGACAAC  
 ATTCGTTTTGGATTGAACAAGGATTTGGGTTTCTCAGAAAAGGACAGAAATGAAAACATTCG  
 TAGAATTAGCGAAGTTTCTAAGCTATTTGCTGATTCATGTGCTATTTCAATCACCTCATTTA  
 TCTCTCCATACAGAGTTGACAGAGATAGAGCTCGTGAACACATAAGGAGGCTGGTTTGAAG  
 TTCATTGAAATATTTGTTGATGTTCCATTAGAAGTCGCTGAGCAAAGGGACCCTAAGGGTTT  
 ATACAAGAAAGCTAGGGAGGGTGTAAATCAAGGAGTTTACAGGTATTTCTGCCCCATATGAAG  
 CGCCAAAAGCTCCAGAGCTACATTTGAGAACCAGCAGAAAGACGGTTGAAGAATGTGCTACC  
 ATTATTTATGAGTACTTAATCAGTGAAAAAATCATCCGTAAGCATTTGTAA

>YNL213C 0.75 Cold

ATGAACATTCTGCGAATAGCATGTCGTTCTTTTCATTGCTGCGCTGCGGTCCATTACTCAA  
 TGAGAACAGGGGATGGTCATCCAAAAAGATTATTAATTTAGTCAATAAAATCGAGTTTGTCCA  
 ATAAAGAGTTTACAGAAAAAGTACGAGATGGTACGAAAGACATTCCTGAGTGGAAGAAGCAG  
 AAAATGGCAGTTAGAAAAAAATGCAAGGCCAGAGGTGGAACCCACCAAAAAAGATATCACA  
 GGAACAAATGGAGGCTCTAAGACTATTGAAATTCAACTTTCTGAACTGACAGCATCTGATC  
 TTGCAGACCGGTTCAAATTTCTCCCCAGGGCTGTTTCAAGAAATTTTGAAGTCCAACCTGGAAG  
 CGTACTGATGAGGAAAACAATAACACCTACGAGAGATGGAAAAGAAGAGGAGAACGGATAAA  
 AGAAATGTATCAAAGAAAAGAGGATGCCGATTTTGTATCCAATCAAATGTTACTAGCAGAA  
 AGATTATACTTGGGTCCAACCTCAAATTCACCTGAATTAATAGCAAGGAATGTTTCGCACTTTT  
 AAACCTTTCAAGCCTAACAAACAGTACACCTGAAAAGAAAAACACCAACAACTATACATTTT  
 GAAGCATTTGGGCTCGAAACAATAA

>YLR088W 0.72 Cold

ATGGCCTTATTGGAGAAGTTGCATCGAAGGATGTTGATATGGGGCTTGTCCCAGCTATAAT  
 CGCCTTATTACCAGTTATTTCCATGCTATGCGCTCTATTTGGGTTTATTTCTATAGCTATTC  
 TGCCTATGGATGGACAGTACAGAAGAACATACATTTCTGAGAATGCATTGATGCCTTCACAA  
 GCGTATAGTTACTTTAGAGAATCTGAATGGAACATTTTGGAGGGCTATCGATCTCAAATTA  
 AGAAATGGTAAACATGACTTCTATGGAAGAAACAATTTGATGGGTTCTTGGTTACAAGAAT  
 TTGGTACTAAGACTGCTATTTACGAAAATGAACAATATGGAGAAACATTTGACGGTGTAATG  
 CACGCTCCTAGGGGTGATGGAACAGAAGCGATGGTGTCTTCCGTTCCATGGTTTAATTCAGA  
 TGATGAATTCAAATATTGGCGGCGCAGCTTTGGGTGTATCTTTAGCAAGATTTTTCTCACGTT  
 GGCCAGTATGGTCCAAGAATATAATTGTTGTCTTCAGCGAAAATCCTCGTGCAGCATTAAGA  
 TCATGGGTTGAGGCATACCATCTTCCCTTAGATTTGACTGGTGGTTCCATTGAAGCTGCTGT  
 TGTGTTGGATTATTCGAGTACGGAAGATTTCTTCGAGTATGTAGAAATCTCATACGACGGTC  
 TGAATGGTGAGCTGCCCAATTTGGATCTTGTCAACATCGCTATATCCATTACGGAACATGAA  
 GGTATGAAAGTTCTTTGCACGGTCTACCCAGTGATCAGTTAACTAATAATAATTTCTGGTC  
 AAGATTAATAATATTTATGCCTGGGAATAAGGGATTGGGCGTTGTCCGGTGTAAAAAGCCCC  
 ATGGTAACGAGGCATTTAGCGGCTGGAGGATTCATCTGTAACATTGAAAGCACATGGAAAC  
 AGTGGTCATGATATTACTACATTTGGACGTATACCCGAAGCAATGTTTCGCTCTATTAATAA  
 CCTTTTGGAAAAATTTACCAATCGTTCTTCTTTTATTTGTTATTAGCACCACGTCAGTTTCG  
 TATCCATTAGTAGTTATTTGCCAAGCGCTGTGGCTTTATCTATAGCATTCGCCATAAGTTCA  
 TTAATGCATTTATAACAATGCTTATGCAAAATATATCCTTATTTTCCGAGTATAATTTGGT  
 AGCGTTGTTGGTTTGGTTTCGTGTCATTGGTGATATCATTTGTTGTTTACAAGCGTTTCTTC  
 TAATACCTTCATCGGGATTATTGATGACAATTAGCATGGCATCTTGTTTTTTACCTTTGATA  
 CTTTCCAGAAAAATTCACATCTCAGAACCCTATCATAACAGGTTGAAAAATGTTGCTTTTTT  
 ATATTTAGTTTGGTTTCAACATCTTTGCTAATGATAAACTTTGCAATGGCTTTACTGATCG  
 GCATTTGGCATTTCCCTATGACATTTGTGAAGACCATTGTTGAAAGTTCTAGCGAACATGAG

GTGACAACTCAATCCTCTAACCCAATAAAAACTGAGCCGAAAGATGAGATAGAGCTCGTCGA  
 GAATCACATGGATACAACGCCAGCAACCCCCCAACAACAGAAACAAAAACTAAAAATTTAG  
 TACTATTAATTTTGACAAATCCATTTATTTCAATAACCTTATTCGGACTATTTTTTTGATGAT  
 GAATTTTCATGGATTTGATATAATAAACAAACTGGTTTCAGCATGGTTGGATTTGAAATGTTG  
 GAGTTGGTTTTGTACTTTGTATAGGTTGGCTCCATGTTGGCTATTGATATTAGCGTCATCGT  
 TTGAATCTAAATCTGTCGTAGTAAGGTCGAAAGAAAAGCAAAGTTAG

>YKL214C 0.81 Cold

ATGGACAAAGCATTTGACGAAATTTATTGGAAATAGTCACACAGACAGCTCATCTAATCATAA  
 GGTAACGAGATACCGCAGAAGGGATTTAAGAAATGAATTAGGACCTAGACTGGGATTTGCGC  
 CTTTCGGATGCTGCATCAAGGTCGAAAGATCGCCTTTATAGAGAGAGGGAAGAGCCTCCTTTG  
 CCTAAGAGAATTAGAATATCCAAAATCCCACTAGACGTTTCTGACTACACCCTCGATGATAT  
 GATTAAGAGTTTGGCTCGCCAATATTTTTCGAAAATTTTTGACAATAAAGAGGATCGTACAT  
 GTATTTACGAATTTGAAGACCCAGAAGTTTTGGAAAAGATTGTCGAGCGTTATAATGGACAT  
 GAGTTACATAATGCAAAAATTTGAAGTGGAGATTTACCAACCACAGAGAAAGCATTCTAGAAT  
 GAATGCCCAACCGTCGCAAAACAGACGGCTCAAGAACACGGAAGAGGCAGGCCAGGGAGCC  
 ATTATCGCCAAAAGCCTAACAGAGTCTCCAAAAGAACAAGGGCCGTGAGAAGAATAACACT  
 CCTACTTCTGTCGAAGCTCTTGACGCTGAATTAGATGCTTACATGAAAGGTTAA

>YNL328C 0.73 Cold

ATGGTTTTGCCTATAATAATTGGTTTTGGGCGTGACAATGGTTGCTCTAAGTGTCAAGTCTGG  
 TCTCAATGCATGGACCGTCTACAAGACCCTGTCCCCTTTAACTATTGCAAAACTAAATAACA  
 TTCGCATAGAAAACCCGACGGCGGGCTACCGCGATGCACTTAAGTTCAAAAAGCTCACTGATA  
 GACGAAGAACTGAAAAATAGATTAAACCAGTACCAGGGAGGCTTTGCACCGCGAATGACAGA  
 GCCCGAAGCCTTGCTCATCTTGATATCTCCGCCAGAGAGATTAATCACTTGGATGAAAAAT  
 TACTGAAAAAAAAGCACAGGAAGGCTATGGTTTCGTAACCACCCAGACAGAGGGAGGGAGTCCC  
 TACATGGCGGCCAAGATAAATGAGGCGAAAGAAGTTCTCGAAAGAAGTGTTTTACTAAGAAA  
 GAGATAA

>YHR055C 0.75 Cold

ATGTTTCAGCGAATTAATTAACCTCCAAAATGAAGGTCATGAGTGCCAATGCCAATGTGGTAG  
 CTGCAAAAATAATGAACAATGCCAAAATCATGTAGCTGCCAACGGGGTGTAACAGCGACG  
 ACAAATGCCCTGCGGTAACAAGTCTGAAGAAACCAAGAAGTCATGCTGCTCTGGGAAATGA

>YCL074W 0.76 Cold

ATGGACGTTGACACTGCGTTTTCTAAACTCAACCATGGATGAGCCGATCTACGTA AAAACAACC  
 ACCGGGTTTTGTTAACGAGAGGAATCCCGACTATGTATGGGA ACTATAACGGCGGTATGTATG  
 GACTCAAACAAGCCCCATTACTATGGAACGAACATATCAACAATACTCTTAAAAAGATTGGT  
 TTCTGTGACATGAAGGCGAACATGGCTTATATTTTCGTTCCACATCTGATGGTCCCATCTA  
 CATTGCCGTATACGTAGACGACTTACTTGTGCTGCTCCCTCTCCTAAAAATATATGACAGGG  
 TTAAGCAAGAATTAACGAAATTA TACTCAATGAAGGATCTCGGTAAAGTTGACAAATTCCTC  
 GGTCTTAACATTCATCAATCGTCAAACGGAGACATCACTCTCTCCCTTCAAGACTATATGC  
 TAAAGCTGCATCTGAAAGCGAAATAAACACATTTAAACTTACACAGACTCCGCTCTGCAACT  
 CAAAGCCTCTTTTCGAAACA ACTTCCCCGCATCTAAAAGACATCACTCCTTATCAGAGCATA  
 GTTGGTCAGCTTCTCTTTTGTGCAAATACTGGTTCGTCGGGACATATCGTATCCAGTCTCATT  
 ACTCTCCAGGTTCTTCGAGAACCCTCGCGCAATCCATTTGGAGTCTGCTCGGCGGGTTCTAC  
 GGTACCTATATAACCACAGAAGTATGTGTCTCAAGTATCGTTCTGGATCTCAGTTGGCATT  
 ACTGTATATTGTGATGCATCTCATGGAGCTATTCACGATCTACCACACTCTACTGGGGGGTA  
 CGTACTCTACTTGCTGGTGTCTCCGTTACGTGGTCATCGAAGAAGCTCAAGGGTGTGATTC  
 CTGTACCATCTACTGAGGCAGAATACATTACTGCAAGTGAACTGTCATGGAGATATAA

>YHR073W 0.82 Cold

ATGGAAACAATTTGATATACAAAATCGATCATTTGTTGTTTCGTTGGGTAAAATGTGGCCGTGG  
 CGATGTAATCAATTATCAGATCAAGCCATTGAAGAAATCTATTGAAGTCGGCATATACAAAA  
 AGTTGAAATCCAGTGTAGATGACCATGCTTCCGCAGTTCACATTGCACCTGACACTAAAACA  
 TTGCTAGACTATACTACGAAATCTCTATTACATAAGGGAAAGTTTCAGTAATATTGAGGAGCA  
 TCACAGGCGTTCTCACAGCACTCTCATAGTTCGAGCAATGGATCGGATAATAAGAGGAAAAG

AGAGATCATATTTCTTCACTGTCCATTAGCGGCATACAGCAGCAATCCCAGGAAATACCCCTA  
CGTGAAAACTCTCTGCGTCAGGATTCACCTTGGTCAAGAGGGTCGGCAACGTTTCCGGTAA  
CACTATGGTCCAAGGTGATCTTGAAGTGAAAGATACAGACTACTATTATGCATTTATACTGG  
ACAACTCGTCTTCCAAGAATGCAAAAAAGAAAATTCTTTTAAACGCAAGTGTGATAAACGGC  
GATAATCAATCGATGATAAGCACAAGATCCACCCCTCCCGCAAGGCCTACAGCTTTAAGCAG  
AACATCTACTCAACAGGATATGTTATTTAGAGTAGGACAAGGTCGTTACTTGCAAGGCTACC  
TGCTGAAAAAAGGAGAAAGAGACTACAAGGTTTTAAGAAAAGGTTTTTCACCTTGGACTTT  
CGATATGGAACCCCTATCGTACTATTTAAACGACCATAATCAAACCTTGTAGGGGTGAAATGT  
CATAAGCTTGTCACTCTGTTAGTGCCAATAAGAAGGACAAAATAATCATAATTGATTCTGGTA  
TGGAAGTTTGGGTCCTGAAGGCTACAACCTAAGGAAAATTGGCAGTCGTGGGTGATGCGTTA  
CAAACCTGTTTTGACGATCAGTTCGAAGATAAGGACACGTCCTACTTTGGAAGAAAATCCCGA  
CATTCTTGACGATGACAAGGAAGTAATTAATAAAAGCTCACCTCAAGACCACGACCACCTCA  
CGCCACGGCTACGACCAAAAAGTGCACTATCACATAGACAGCATACTCAGAAAGACATGGAT  
GACATATATGTCCATTGCCAGCGAATCTTACGCTACTTTCTCCATGAATCTACGTTTGAT  
TCAACAACGACTGGAGCAGTGTAATAAAGACTCGTTATCTTATAAACCAACTACTTTACATC  
AAAGATCGGAGGGGCTAAATGGAACACATTCGTCATCTTCCGTCTTTACCAATAATAGAGTG  
TCTTCATTCAATCATTCTTCTTCTGGTATGACGTCATCTGATTCTTTAGCCTCTGAAGAGGT  
TCCCTTCCAACAAAACATATATTGAGCATGCTTTATATAACCAATTGGCAGATCTTGAAGTAT  
TTGTTAGCCGGTTCGTTACACAGGGAGAGGTTTTATTCAAGGACCACCAGATCCTGTGCAAG  
AAAGCAAAGACACGAGAGTTTCTTTAACTTCATATCTTAGCGAGAATGATGAATTTTTTGA  
TGCAGAAGAGGAAATCAGTCGGGGAGTCATTATATTACCTGACACAGAAGATGATATTAATA  
ATATAGTCGAGGAAACTCCCTTCTTGGTAAAAGTGACCAAAATGAGTTCACAAAAGAGGTC  
CAATTGTCGGGATCCGAACAGATAGCTTCATCAAGTGTGGAGAGCTATACTAACGATGA  
AAATCATAGCCGTAAACACCTCAAAAATCGTCACAAAAATCGTCGCCGTGGCCACCCTCATC  
ATCAAAAAACAAAAGCGCCCAATCCTCAACAGAAACATTTACAAGTAAGGATTTGTTTGCT  
CTTTCCTATCCAAAGAGTGTTACACGCCGTAATGACATACCTGAAGCTGCAGCTTCTCCGCC  
AAGCCTATTATCTTTTTTGGAGAAAGAAATGTAGGCAAAGATCTGAGCTCTATTGCCATGCCAG  
TAACCTCAAATGAGCCTATTTCTATTTTGCAGTTGATATCAGAAACATTTGAGTATGCTCCA  
CTTTTAAACGAAGGCTACCCAACGTCCTGATCCTATAACCTTTGTTTTCTGCATTTGCTATTT  
CTTCTTTTCCATATATAGGGATAAAACAAGAAGCCTAAGAAAGCCTTTTAATCCTTTACTGG  
CTGAAACATTTGAACTTATACGAGAAGATATGGGGTTAGGCTTATATCGGAAAAGGTCCTCA  
CATCGTCCCTCCAGTATTTGCCCTTCTTTCGAGAGCATCTCGACTGGGAGTGTAGTTACACTGT  
AACGCCATCGCAAAAGTTTTGGGGTAAGTCTATTGAATTGAATAACGAAGGTATACTGAGAT  
TGAAGTTTAAAGACAACCTGGAGAACTATTTGAATGGACGCAACCAACAACCTATTTTTAAAAAT  
TTGATAGCGGGTGAGAGATATATGGAGCCTGTCAACGAATTCAAGTACATTTCTTCAAGGG  
AGACAAATCACACATCCTGTTGATAAGGCAGGTATGTTTAGTGGAAGATCTGAAGGATTTA  
AGGTTTCGATAATCCCACCACCTTCGAGCAATCGCAAGAAGGAAACTCTAGCTGGTAAATGG  
ACACAGAGTTTAGCTAATGAAACTACACATGAACTATAATGGGAAGTAGGTGATTTAGTTAG  
CAATCCGAAGAAGAAATATGGCTTTACTAAATTCACCGCAAATTTGAATGAGATAACTGAAA  
TTGAAAAGGGCAATTTACCACCTACGGACTCAAGATTAAGACCAGATATTAGAGCTTACGAG  
GAGGAAAATGTTGATAAGGCGGAAGAGTGAAGCTGAAATGGAACAACCTTCAACGTGAAAG  
ACGTAATAAAGGGCAAGATGTGGAGCCTAAATATTTGAAAAAGTATCTAAGAATGAATGGA  
AATACATAACTGGACCGAAGAGTTATTGGGAAAGAAGAAAGAAGCATGATTGGTCTGATATT  
TCTCAACTCTGGTGA

>YLL021W 0.8Cold

ATGGGTACGTCAAGCGAGGTTTCTCTCGCACATCATAGAGATATCTTCCATTACTACGTCTC  
ACTGAAGACTTTTTTCGAGGTGACTGGCGAAAATCGTGACAGGTCAAATTCGACACGAGCTC  
AAAAGGCCAGAGCCAAGCTGTTGAAGCTATCTTCTTCGCAATTTTACGAGCTGAGTACAGAC  
GTGTCGATGAGCTGCAGAGGAGAATCGGTGAAGATGCTAACCAACCAGATTACCTTTTGCC  
GAAGGCAAATTTCCACATGAAAAGGAACCAGGCTAGACAGAAACTGGCCAATCTATCACAAA  
CTCGATTTAATGATTTGTTGGACGATATCCTTTTTGAGATCAAGAGAAGAGGGTTCGACAAG  
GATTTGGATGCTCCACGGCCCCATTACCGCAGCCGATGAAACAAGAGGTCAGCAAAGACAG  
CGATGATACTGCAAGAACATCCACAAATTTCTCTCTGTGACTCAAGTAGCTCCAAACGTCT  
CCGTACAACCTTCTTTGGTCATTCCTAAGATGGCATCTATCGATTGGTCTTCTGAGGAAGAA  
GAAGAGGAGCAAGTAAAGGAGAAGCCAAATGAACCGGAGGGAAAACAAACAAGCATGGATGA  
AAAGAAAGAGGCTAAACCTGCTCTAAACCCCATAGTTACAGATTCTGATCTGCCTGACTCCC

AAGTGCCTCGCTCGTGATATCACATCAATGGCAAGGACTCCAACAACGACGCATAAAAAATTAC  
 TGGGACGTTAATGATTCTCCAATTATCAAGGTAGATAAAAGATATCGATAACGAAAAGGGTCC  
 CGAACAGTTGAAGAGCCCTGAAGTACAACGGGCTGAGAACAATAACCCCTAAGTACAGAGATGG  
 AAGACAAGGTTAAAGAAGTACTGACTGATTTAAACAGCGACTTACATTTGCAAATTTGAAGATTTG  
 AATGCTAAGTTAGCATCTTTAACCAGCGAGAAGGAAAAGGAGAAGAAGGAAGAGAAGGAGGA  
 AAAAGAAAAGGAAAAGAAGTAAAGATTAACCTACACCATTGATGAAAGTTTTTCAGAAAAGAT  
 TGCTGTCATTAAGTCTCTCAAATCGGTGAATTATCAATTGAGAATGAAAATTTGAAGCAGAAA  
 ATTTTCAGAATTCGAACTGCATCAAAAAAGAATGACAACCATAATGATTTGAAAATCACTGA  
 CGGTTTTATTAGCAAGTACTCTTCTGCCGATGGGCTCATTCAGCTCAATACATCTTAAACG  
 CTAACAAGTTGATAATTCATTTACTACTAGGCTTTCCGCGTACCCATAGGCGACTCCACG  
 GCAATTTCCCATCAAATTGGCGAAGAGTTATTTCAAATATTATCCCAGTTATCGAACCTAAT  
 CTCCAGCTATTACTATCGGCCGACCTATTACAGTACAAAAGATCAGGTCATTTTACTGAAGG  
 CATCATTTATCGCATGCGATCACATCGATAAGATATTTCTCTGTTTACGGTCCCCTATTAATT  
 CCGAAAATAACTGTGCAAGCTGCTGTTTTCAGAGGTTTGTGTTTGCCATGTGTAATCTAATTGA  
 TTCAGCGAAAATAAAATCCGATTCAAATGGTGAGAGCACCACTCTAATGAAGGTAACCGAC  
 AGGTATTAGAATATTTCTTACCAACTGCTACCACCCCAATGACGCCAACTTTCCCTCGACT  
 TCTGGAATAAATATGAAGAAGGGGTTTATAAACCCAAAGAAAACCAGCATCTTTCTTGAATGA  
 TGTGGAGGAAGAAGAATCTCCAGTCAAGCCATTGAAAATTACACAAAAGGCAATTAACAGTC  
 CGATCATAAGACCGTCAATCGTCTAATGGAGTTCCAACAACCTCAAGAAAACCTTCAGGAACG  
 GGGCTATTTAGTTAATGATTGATTCATCAATTGCTAAGAATAGCTCCATAAAGAGGATAA  
 TGATAAATATGTCTCGCCATAAAGGCAGTAACATCGGCCTCCAATTTGCAAGTAGCAATA  
 TTTCCGAAATTCCTAAACTAACACTACCTCCACAAGCCAAAATCGGTACTGTTATTCCACCG  
 TCAGAGAATCAAGTTCCCAATATTAATAATCGAGAATACAGAAGAGGATAATAAAAGGAGTGA  
 CATAACAAATGAAATCTCTGTTAAACCAACTTCTAGCATTGCTGATAAACTGAAACAATTTG  
 AGCAAAGTTCCGAAAAGAAATCATCACCAAAAGGAAAATCCTATAGCAAAAAGAAGAAATGGAT  
 TCAAAACCAAAACTATCCAATAAATTTATCACTTCAATGAATGATGTGTCACAGATGATTC  
 AAGCTCTGATGGTAACGAAAATGACGATGCAGACGATGATGATGATTTTACCTATATGGCAT  
 TGAAACAAACAATGAAGAGAGAAGGTTCAAAAATTTGAAAAAATAATGACAGCAAACTACCT  
 GCAAATATAGTGAACTTGATTTACATGAGTCACCGGAGTCCGTGAAGATTGAATCTCCTGA  
 ATCGATAAAGGAAATCACGTCACTGAAATGCTTTAGAAAATGCCAAGTAGTTCCGCTGCCTA  
 AGAGATTAGTAGAGGATGTTGAGCCTTCAGAAAATGCCAGAGAAGGGCGCATCTGTAGAATCA  
 GTCAGGAAGAAAAATTTTCAAGAACCCTTGTTAATGTCGAATCTCCGGATATGACGCAGAA  
 GGTCAAGTCTTTGGGTATGACAGGAAAGGCTGTAGGCCCAGAATCAGATAGTAGGGTCAAT  
 CTCCGGGCATGACAGGACAGATTAAATCTTTGAATATGGCAGGAAAAGTTGTAGGCCCAGAA  
 GCAGATAGTAGGGTCAATCTCCGGGCATGAAAGAGCAGATTAAAGTCTTTGGGTATGACAGG  
 AAAAATTACAGCTCAAGAATCAATCAAGTCCCGGAAGCGGCTAGGAAGTTGGCGTCATCAG  
 GAGAAGTTGACAAAATTTGAATCTCCAAGAATGGTAAGGGAAAGCGAGTCTTTGGAGGCAGTA  
 GGCAATACTATCCCTCAAACATGACAGTGAAAATGGAATCCCAAATTTAAAGGGAAATAC  
 TGTGTCTGAACCTCAAGAAATAAGGAGAGACATTGCCTCCTCAGAGCCGATAGAGAATGTTG  
 ACCCCCCAAAAGTACTAAAAAAGATTGTCTTTCCAAGGCTGTTAATAGAAGTGGATCACC  
 AAATCAGTCGAAAAGACTCCATCTTTCAGCTACACTGAAAAGAGCGGGCTCCAGAACCGAA  
 TAGCCAAATTTGTTCTCCTGAATTGGCAAAAATTCACCTCTAGCACCGATAAAGAAAATG  
 TCGAGTTACGAGAACTAATAAACACATACTGAGACTATCACTTCTGTGGAACCAACAAC  
 AAGGATGCCAATACTTCTTGGAGAGACGCCGACTTAAACCGTACGATCAAACGAGAGGAGGA  
 GGACGAAGATTTTGATAGAGTGAACCACAATATCCAGATCACTGGTGCATATACGAAAACCTG  
 GAAAATTTGATTATCATAAAAATACCTGTTGATCGTAAAGCAAAAAGCGAAGCAGAAGTGCAT  
 ACTTCCGAGGAAGATATTGATGAATCAAATAATGTTAATGGAAAAGAGCTGATGCCCAAAT  
 ACACATCACTGAAAGAAAGCATGCTTTTCGTAAATCCAACCTGAAAATTCACAGGTAAAAAAGA  
 CGAGCCACTCACCATTTTTAAACAGTAAACCGGTTCAATACGAGAAGTCAAGTTCGAACGGC  
 GGCATTAACAACCACATAAAGATAAAAAATACGGAGAACTACGGCACATGACGAGAAACA  
 TTATAGTGATGATGATGATTTAGCTATCAATTTGTTCCCATGAAACATGAAGAACAAGAAC  
 AAGAACAAAACAGAAGTGAGGAAGAGGAAAAGTGAAGATGACGATGAAGAGGAAGAAGACAGT  
 GATTTTGATGTGGATACATTTGACATTTGAAAATCCGGATAATACACTATCAGAGTTACTATT  
 GTATTTAGAACATCAAACAATGGACGTCATATCCACGATTCAATCGCTTTTGACATCGATCA  
 AGAAACCACAGGTGACGAAGGGTAATTTGAGGGGAGAATCGAATGCAATCAACCAAGTCATA  
 GGTCAAATGGTGGACGCTACTAGCATATCAATGGAGCAAAGCAGAAATGCCAATTTGAAGAA  
 ACACGGTGATTGGGTGGTGCAAAGTCTAAGAGACTGTTTCGCGTAGAATGACAATTTTGTGCC

AATTAACTGGCGATGGAATACTAGCGAAGGAAAAGAGCGATCAAGATTATGCTGACAAAAAC  
 TTCAAACAGCGGTTGGCAGGGATTGCGTTTTGATGTTGCCAAATGTACAAAGGAGCTGGTAAA  
 AACTGTAGAAGAGGCAAGTTTTGAAGGACGAAATAAATTATTTGAATTCGAAGTTGAAGTAA

>YOR218C 0.75 Cold

ATGAATAAATCATGCTTTTCGTTTTCCTTTTTTTTGCTACCACCAGGTTTACTGGTGGCAGTCT  
 TCCTCTTCGTAGGTTTGGCTTTCGTCTTGATAAGTTTTATCCTTCTTCAAGTCTGTGCTACTA  
 TCTTGTGTTTTCTTCATCATCTGCGGAACTGGATTGTCATCTGCGTCAACGACATCTTCGAA  
 ATCGGGGGTGTAGTACTGGTGCCAACACCACCACCAATAGTACTACCTGTTCTGTAAA  
 TTGCGACTGGATGTGTACTACTGTTGTATTTCCGCGTGAATCCACTTTTAACCGTAGCTGGT  
 ATCTTTTTGATAATGGCTGTGGTCACATCAGGACCTACGAAAACTCCATAATAGAATCCCA  
 GTCTTCTTTGGTCAAATAGTAATCGTCCATTACCTCTATGACAGATGA

>YLL002W 0.69 Cold

ATGTCACTGAATGACTTCCTAAGTTCCGTGCTACCTGTCAGTGAACAATTTGAATACTTATC  
 GTTGCAATCTATTCGGTTAGAAACCCATGCTGTGTAACCCCAAATAAGGACGACAAAAGGG  
 TCCCAAAAAGCAGATCAAGACTCAACACTTCTTTAGTCTATTTACCAAGGAAAAGTTTTT  
 TTTTCATTAGAAGTGTATGTGTATGTCACGCTTTGGGATGAAGCAGATGCCGAACGGTTAAT  
 ATTTGTATCAAAGGCAGACACTAATGGTTATTGTAATACGAGGGTAAGCGTTAGAGATATTA  
 CAAAAATAATATTAGAATTTATATTATCAATCGACCCGAATTACTATCTTCAAAAAGTAAAA  
 CCGGCAATAAGATCATATAAGAAGATATCCCCGAGCTGATTAGCGCAGCCAGTACGCCAGC  
 AAGAACTTTAAGGATTTTGGCTAGAAGGCTTAAACAGTCAGGCAGCACCGTTTTGAAAAGAAA  
 TAGAATCTCCACGTTTTTCAACAAGATCTTTATCTCTCATTACCTGTCTCGTGAGATTTTG  
 ACCAAAATTTGTTTATTTACTAGACCTGCATCCCAGTACCTCTTCCCAGATTTCTTCAAAAA  
 CAGCAAAAAGCATATACTAAAATGGCGAGGAACATAAGAAATGGTGGGGCTTTATTTTGGATA  
 GATTACTAATTGAATGCTTTCAAAATGATACACAAGCAAAAATTAAGGATACCGGGCGAAGAT  
 CCTGCTCGAGTAAGATCATACTAAGAGGGATGAAATATCCACTATGGCAAGTGGGTGATAT  
 ATTTACCTCTAAAGAAAATTTCTTTCGGTATATAATATTCCATTATTCCAGACGATCCTA  
 AGGCTAGATTTATACACCAATTGGCAGAGGAAGATCGCCTCCTCAAAGTAAGCTTATCATCC  
 TTCTGGATTGAACTACAAGAGCGTCAAGAGTTCAAATTAAGTGTACATCATCTGTAATGGG  
 TATTTCCGGGATACTCTCTTGCCTCCATCTTTATTTCCATCTAGTGCCGATGTTATTGTAC  
 CGAAGTCAAGGAAGCAGTTTAGGGCAATCAAGAAGTACATTACTGGAGAGGAATACGATACA  
 GAGGAAGGCGCAATAGAAGCTTTCACCAATATTCGTGATTTTCTATTGCTCAGAATGGCAAC  
 AAATCTTCAATCTTTAACAGGGGAAGAGGGAGCATCGGGAGAGAAATCAGCCGGTTCCCTGCAA  
 GCAACATCAACACGTTGGCGATAACAATGCTAAAACCGCGTAAAAAAGCTAAAGCCTTGCTT  
 AAAACTTGA

>YNL234W 0.69 Cold

ATGACAGGAGAAAAAATACTTCATTTCGAGTTGTTAACCAACAGCGACATGTCTAGCGGGAA  
 TGTCCACCATAACGAAACCGATGATGTACAACGTAACCCCTGCCTTCTACAACAGCAGTAGTA  
 TAGGTCCAGTCGATAATTTGAAAATAAACGAGAGACCTGGCTCTCATGATCATTCCATGAGA  
 AGTGAAATGTCAACAAAACCTCCGGAAGCGATTTTATGCCACAATCTATTTACGTTCCGA  
 AGGTAGTGTCTACCAGGTCAAGATAGATCGTGGTGACTCCCCGAATACAGAAGGATTCGACT  
 TTAAGTTAATGCAAGAGATCTGCTGTTACTTCGAATGTCTGGGATATCCTCCTCAGGGAG  
 TATTTAACACCTAAAGAATTTAAAGTTTTTCAAGCACTTCTGTATTCCAATAAACATATTAC  
 TTCAACAGAAAGACCCTATTTGAATACTGCTCCTGACGGTATGATTTCCAAAACCTATTGACC  
 CTACTGCCAGGCCACGTA AAAACAAAACAAAGGGACAATGATAACAAGGTGATACTGCACATA  
 TTTTGTTCACAGTTTTATGACAATTTGATTGCAATGGATCCCTTGTTAGAAGAATATTTTCC  
 ATCATTTAAAACATCAAGCAGTTTCGTTCTGTAAAGTCCCTGATTCTGCTATTGACAACCTTG  
 AAAACGTTTCATGTCCCTAGATGATTATATTGTGAAATTAGGAAAACGCCATTCAGAAATCTC  
 GGCATCAAAACCGTTGGTTTTCGAAGTAATGGGAAAAGCATTTATGACTACATTGCAGGACAG  
 GTTTGGATCTTTTCTCACACTGGAACCTAAAATCTATGGGGACAACCTTACTCATATTTGG  
 CAAATTTGTATGATTACTGCAGGGAAGGACCCAATGGAAAAGATTCAACCAGATTTTTCGTAT  
 AATGGTGACTCTGTGGTTTTAAATTTTTCCATTTCCAAACTTGCGATGCATGATATAAGTAC  
 AGTTAACAAAGCTACAAATGGTGA AAAACTAAAACGCTACTATACCTCATAATATAACACAAG  
 TACCGACAAATAAAATTCCTACAGAAATACTCTTAGACAATTTCTTACTCCAATAAAAAGC  
 GACCGTGAATCGACGCCTCCAATCTCACCAAGGGCTCTGGAAGTACAAAACCAAGCATCGG



TAGCAGTACCGTCGTGGAAAGTAATACCAAGAAAAATAATTATGATGAAAAAATCCATTTAT  
TGCAAAAAACTGCTCAGCAGAAGAACTGCTCGATTATGTAA

>YNL189W 0.71 Cold

ATGGATAATGGTACAGATTCTTCCACGAGCAAGTTCGTTCCCGAATATAGACGAACAAACTT  
TAAGAATAAAGGCAGATTCTCTGCAGATGAAC TTCGTCGTCGTAGAGATACACAACAGGTCG  
AATTAAGAAAAGCAAAAAGAGATGAAGCTTTGGCCAAAAGAAGAACTTTATTTCCCAACT  
GATGGCGCTGATTCTGATGAAGAAGATGAGAGCTCCGTTCTGCGGACCAACAATTTTACAG  
CCAGTTGCAGCAAGAACTACCACAAATGACTCAGCAACTTAACTCTGATGATATGCAAGAGC  
AATTGAGTGCTACTGTTAAGTTTAGACAAATTTTGTCTAGAGAACACCGCCCTCCAATTGAT  
GTCGTCATTCAAGCCGGTGTGTTCCAAGATTAGTAGAATTTATGCGTGAAAACCAACCTGA  
AATGTTACAATTGGAGGCTGCTTGGGCTTTGACTAACATTGCATCAGGTACATCTGCTCAA  
CAAAAGTGGTTGTTGATGCTGACGCTGTACCTCTTTTCATTCAACTATTATATACCGGCTCC  
GTTGAAGTTAAAAGAACAAGCCATTTGGGCTTAGGTAACGTTGCAGGTGATTCAACTGACTA  
CAGAGACTACGTTTACAATGTAATGCCATGGAGCCAATTTGGGTCTTTTAACTCCAATA  
AACCATCTTTGATCAGGACCGCTACGTGGACTTTATCCAATTTATGCAGGGGTAAAAAACCA  
CAACCAGATTGGTCAGTGGTCTCACAAGCGTTGCCAACCTTAGCGAAATTAATCTATTCGAT  
GGACACTGAAACTTTAGTTGATGCTTGTGGGCTATCTCTTATCTATCTGACGGACCACAAG  
AAGCTATTCAAGCAGTGATCGATGTTAGAATTCCTAAAAGACTTGTGTAATTACTGAGCCAT  
GAATCGACTTTAGTCCAGACTCCTGCTTTAAGAGCTGTAGGTAATATAGTCACTGGTAATGA  
CTTACAGACTCAGGTCGTTATAAATGCTGGTGTCTTACCTGCGTTAAGACTTCTGCTAAGCT  
CTCCAAAAGAAAAATATCAAGAAAAGAAGCGTGTGGACCATTTCGAATATTACGGCTGGTAAT  
ACTGAACAAATTCAGCGGTAATTGACGCGAACTTGATTCCCTCCATTAGTTAAACTTTTGGGA  
AGTTGCAGAATATAAACTAAAAAGAAGCTTGTGGGCTATTTCCAATGCCTCTTCAGGTG  
GTTTACAAAGACCAGATATCATAAGATATTTAGTATCTCAAGGGTGTATAAAACCATTGTGT  
GATTTGCTAGAAAATTGCTGACAACAGAATAATTGAAGTTACCTTAGATGCTCTTGAAAAAT  
TTTAAAGATGGGTGAAGCTGACAAGAAGCTCGTGGTTTGAATATCAATGAAAATGCCGATT  
TTATCGAAAAGGCTGGTGGTATGGAAAAGATTTTCAACTGTCAACAAAATGAAAATGACAAG  
ATTTATGAAAAGCATACAAAATCATTGAAACCTACTTTGGTGAAGAAGAAGACGCCGTAGA  
CGAAACTATGGCTCCACAAAATGCCGGTAATACTTTTCGGCTTTGGTTCTAATGTCAACCAAC  
AATTC AATTTTAACTAA

>YKL170W 0.64 Cold

ATGATATTTCTAAAATCTGTCAATCAAGGTAATCGACAATTCAGGTGCACAATTAGCAGAATG  
TATTAAGTAATAAGGAAAGGGTCCCCCAAGAGTCTGCAATGGTTGGAGACAGAATAGTCT  
GTGTTATACAGAAAGCAAAGCCCTTACTCAAACATTACGGGGACAGCCAACACCAACCGT  
GTCAAAAAGGTGATATTTGTCACGCAATTGTCGTAAGGTC TAAACAGCGTAACATGTGCAG  
AAAGGATGGCTCCACCGTTGCATTCGGAGATACTGCTTGCCTTTTGATTAATAAAAATACCG  
GTGAACCTCTGGGACAAGAATTATGGCTAATGATGGTTGTGTAGATAGAACACTGAAAGAC  
AAGGATACAATAAGATATGCTCTTTGGCAAGTAGGGTCATATAA

>YER007W 0.81 Cold

ATGACTTATGAAATTGGGGACAGACTCAAGATTGGTGGATATTTTTGCACCATCAAATTCAT  
AGGTGTTATTAAGCCGTGGCCTTCGGTAAAAGCTTATGGGGTGGAAATGGGACGATCACAGCC  
GGGAAAACATCTGGAACAATAGATGACATACACTATTTTGACGTTCAAATTCCTAATTC  
GGATCATTTTTGAAGGAGTCTAAGATTAAATCTCCAGGTGTACGCAGAATTACGTTTTACGA  
AGCATTTGTCAGAAAAGTATGGAGGCTCGAGTAATAACATTAATGACCTATCTATAGGTAACA  
AAAGGGTTGAGGGTTTGGGATTCGATGAACTAAATGCGAGAAATAAGAATTATAAGAAGTTA  
AGAAAATAGCTTTGCGAGATTCCGATGTGCTATATTGTTTCAAATCAAGATGAGTTAAA  
CCGTGTAATACAAAATTTGTGTGAACGTCAAGGACCTTGATTTATCGCTTAATCTATTCACGA  
ATATCAACTCTTTATGTGAGTTCATAGAACCTTTGAAGAACCTTGAGAGGCCTTAATATATCT  
CAAAATAAACTTTTAAAGCGGTGGGACAACCTTGAAGAATATGACCTATCACACATCAAAAC  
TTTACGTCTGTCTTCCTGTGGTTTAAAGTTATAAACATATGGTAAGCTGCTCAAAGCTTCA  
GGACACTGAAAATGTTGGATTTAAGCTATAACAACCTTGACCAGTGCGGGAATCCAAAATTTT  
GAGAATGAAATACCGTGTACTTTGGAGGAACTGAATATTAGCGGAAATAATCTTATATCGTT  
TCCATTGTTTCCAAAAATTTGACATTGAAAGGTTTAAATGTCTCCAATAATCAAATTTCTA  
GAGACCAAGTATGCTATTTATCTGTTGAATCCTTGGATATAACAGATAACAAATTTAAG

GAAAGAAGTTTGATAGATGATTTGAATAAGACATTTCCCTCTTTGAAAAATATCCATCTGAG  
 TGGCAACGAATTCACACTACAACGGAATTATATTAACGTCGAAGAACAGGCTACTTTTTATG  
 AAGTACTGGCTAGGTTTTGATCGTGTGATGGTATTGAATGGATCAATATGTGATGTAAAAACA  
 AGAAGAGAGGCTGAGATGTTTTTTGTTTTCCAAGTAATGAATAACGAATTGAGCTATGACAC  
 CAATCTGCCGCTTGGTCAAGCCTCATAAAGTCGTATGAAATCGATATGAGTAAGCTAAGTT  
 TCAACAATGAAAGAGAAACACGGCAATCTCTTGTCTTAAAAATAAAGATAAGAGCTGGCAAG  
 AAGCCGAGTAGTGATTTAGATTATTGGGTCTTCCCAGTTTTACAGTAAGGTACGTTAAGAG  
 TGTAATATGTCGAAAGCTAAACTTTGACATACTGAATGTTAAGTTATTTTCATGAAAAATCTG  
 AAGGGATGATAAACGAAATAAAGTATAATTTTCGCCCATTTTCAGATTTTAATGTTGTGAAC  
 GGAGATATTATTCATGTTTTCGTCTCCAGTAAATAACAAGAGCATTTCAGAAGGTTAACAGCCC  
 ATCGTAA

>YOL007C 0.79 Cold

ATGAGACTGCCAGAAATCTCCATTTGGAAAGTGATACTACTACTTTCATTTGTTTGCTCTACA  
 AGAATTTCAACTTGTCTCCGCTGCAAATTTGCCCTCTTTATCAAGTAGTACAAAGGCAGCAG  
 ATAGTTCTAGTAAAGGCAGCTCTTCAGCCAAGACAACCACGTCCTTAGGCAAAAGCTCAGTA  
 ACCAGTAAGGATGTTTTCGTCAAGTCATAATGTCACCTTCAAGCACTAAAAATGCCAAAAATCAC  
 CACGAGCGCTAGTACAAGCTTATACACCAACTCTAGTTTTATGGAGCAACAACAGTGTAATAT  
 CAACTTCATCTATTACACCTTCCAGCGTTTTATATCCCGGTTACGGACGGAAATAAATTTCTTA  
 TATCAGGCTCATCATCCTAACGGTACTGTGTTTCATTGCATTTGCTGGCTGTTTTAGGTGCAAT  
 TCTACTATCACTGACGGGTGCATGGATTGCATTTGAATATAAAGTCATGGCGAAGTGCTAGAA  
 AGGAAAATAAGCTGAGAAATCTAGAAAATCAATACCAACACGATCCTTTCTACTTCCAAACA  
 AACATTAATGACGACGAAAGTGAAACATCTTCCATTCTGACGACAGTGACATATCAGAAAA  
 AGTTCGAAAAATAACTCATCTCGTATGAGTTTGTATACTCTAGGATCCACTTCTGTTTTGA  
 ATCTTTTGAACAATAAAACAGATGCCAACGATAACTTCAGATCATCTATGTTTTATTTACCCC  
 ACCGAAATTTGCAATCTGATGCCAACAACTCTAATACATGGTCTCAAAGCAATGAGAGTGC  
 TATATATGATTCCTTGTCCAGTACTCCAAGGGAACCTGGTGCTACCCAAATACTGGGAAAGT  
 TTACAGACAGCACTAATCCATTCAATTATACATCATACAATTTAAGTCCCGACTCTGAAGAC  
 CGCTCTACTCCAAAATCAAATGTTAGTCAGGGTAAAGTAAAGAAGTACCGTCCTCCCAGTGT  
 TCATCTGGATCAACTGCTCGACGGTAAGGAATAA

>YNL210W 0.76 Cold

ATGAGTAACCAACACAGCCCTCAGCCATTTTGTGGACACCAAATTTGGTGAACCTATTAGA  
 AGAGCTCCAGGAGGAAAGCAATTCACAATAAAAACATATTCCCGAAAAAGCATTATATT  
 TGAAGCTCGCTCTTGATTATTCTTTCTTCAGAAAGAATTTACTAGAGTTTTGCGTCCACCTT  
 GACAAGATAAAAGGAGTCATTAGACCAAACCTATGACACTATATATATTTTTGTGCCTGTTGGA  
 GGTGGATCTCCTCAATCTGGTATTTACCGACAATATATTGGAAATATGTTTGGCCAGGTTTG  
 TTTCAAGGGAGGACTTGAGGGTTTTTAATAATACTTTTTTACACATATCACGATAACCGCCTA  
 CGTATTCTCCAAGAAGACTTTTCTCAATTGTTCAAAAAAATCAAACCTAAGGCTTCTGTACT  
 ATGTTTTACAGTTGAGGAAATTTTCTGACAAACCAAGAAATTTTACCTCAAACCTCAACAG  
 TGGCAGAACTGCAAAAGAGCACTAATAAAGTACAGACAAATGGGCCGCAACGGCACGATTTT  
 ATAGTCACTCTAGAAATAAAACTGAACAAAACACAAATCACTTTCTCATTTGGAGCTAAAGG  
 AACGAGAATTGAAAGCTTGAGGGAAAAATCAGGCGCCAGCATAAAAAATAATACCTATTAGTG  
 ATAAAATGACTGCACATGAAAGGAACCACCCTGAATCTGTTCAACAAACAATACTAATTTTCG  
 GGTGACTTATACTCAATTGCATTAGCCGTCACCAGTATAGAGTCTGCATTAATTACTTTGGA  
 TTTATAG

>YAL009W 0.82 Cold

ATGGAGCCAGAGAGCATAGGCGATGTGGGGAACCATGCCAGGATGATAGTGCCAGTATAGT  
 GTCCGGGCCTCGCAGGCGTTCTACTAGCAAGACATCCAGTGCGAAGAATATACGGAACCTCCA  
 GTAATATCTCTCCAGCATCGATGATTTTCAGGAATTTGTTGATACTGGAGGATGATTTAAGA  
 CGCCAAGCTCACGAACAAAAGATACTGAAGTGGCAATTCACTTTGTCTTAGCGTCTATGGC  
 CGGTGTAGGCGCATTTACCTTCTACGAACTTTATTTCACTTCAGATTATGTCAAGGGCTCC  
 ATAGGGTTATTTTGAATTCACCTTTCTTTTCATTTCCATTACTGTAGTTCTTTTTTCATATC  
 AGTGGACAATATAGAAGAACTATCGTCATTCCAAGAAGATTTTTTACCTCTACTAATAAAGG  
 GATTAGGCAGTTAATGTGAAGCTAGTTAAAGTACAGTCTACGTGGGACGAGAAATACACAG  
 ATTCAGTAAGATTTGTGAGTCGAACAATTGCTTATTGTAATATTTATTGTTTTGAAAAATTT

CTGTGGCTTAAAGACGATAATGCCATTGTGAAATTTTGGAAAAGTGTACGATACAATCCCA  
 ACCGAGGATCGGAGCTGTGGATGTGAAATTAGTCCTCAACCCAGAGCATTTAGTGCAGAGA  
 TTAGAGAAGGATGGGAGATTTATAGAGACGAGTTTTGGGCCAGGGAAGGTGCTAGAAGACGC  
 AAACAAGCGCACGAACTCCGACCTAAATCAGAATGA

>YKR087C 0.75 Cold

ATGTTACGCAACATCATCAGGTTCAAAGGATTTGGAAAAGGGACCAGTGGAGGATTTTTAAA  
 ACCTGTATCATTTTCGTGTTTCAGTTAACGCGATGTTACCGCTATGACAATGGTCCTTCATATC  
 GTCGATTTAATAATGGAGAGTATTTCCAAAAATCATCGTTTAAAAGCATTTCTTCTCGATAAG  
 TCATCAAGAAAATACTTAGCTTTATTATTTGGTGGATGCTCTCTCTTTTATTATACACATTT  
 GGATAAAGCACCCGTAAGCGATAGGTCCAGGTTTCATCTGGGTATCGCGTCCATTAGAGTTAA  
 CTATCGGAAATTACACATACAAATCAATTTGGAGACAAACGCAGCAGGAAATATTACCTCCA  
 CAGCATCCGCTGTCCATCAAAATGAGAATAATTTTCATGAAAATTGTGCAAGCTGCTTATAA  
 GGACCCTAGTGTAGACAACCTCACTACTGGACGGAATCAAGTGGGAAATTCATGTGGTCAATG  
 ATCCAACCTGCTTCACCAAATGCATTCGTTTTACCAGGGGGTAAGGTCTTTATATTCAGCTCT  
 ATTTTACCTATTTGTGCTAATGATGATGGGATTGCCACTGTTTTAGCACACGAATTTGCTCA  
 TCAGCTAGCAAGACACACAGCCGAAAATTTGTGCAAGGCTCCTATATATTCTCTTTTGGGTT  
 TGGTGTATATACTGTTACTGGAGCTCATGCTATCAACAATATACTATTGGATGGGTTTTTG  
 CGAATGCCAGCATCAAGACAGATGGAAACCGAAGCTGATTACATTGGCCTGATGATAATGTC  
 AAGGGCATGTTTTCAACCACAGGAGTCAATAAAAGTGTGGGAAAGAATGGCAAATTTTAAA  
 AGCAAATGAATAGAGGGGGTGTGTGAATATGGAGTTTCTAAGTACACATCCAGCAAGCACT  
 CGTAGAATAGAGAATATGTCGAAATGGTTGCCAAAAGCTAATGAAATTTATGAACAATCTGA  
 TTGTAGCAGTATGGGTAACCTATTATAAAAAGTTTTTTCTCAATGTAA

>YKL013C 0.82 Cold

ATGTCACAATCATTACGTCCGTATCTAACGGCTGTTTCGTTATTCCCTGGAAGCTGCGTTGAC  
 TTTGAGCAATTTCTCTTCGCAGGAAGTGGAGAGGCACAACAGACCGGAAGTTGAAGTCCCTA  
 ACCTAGCGCCGAATTGTTGCTCCAACCGATGCATATATCTCGTAATGAAAATGAACAAGTA  
 TTGATTGAGCCCAGTGTAAACTCGGTGCGTATGAGTTAATGGTGAACAGGCAGATGAAAT  
 TGAGCAGATTTTAGTTTACAAGTTTACTAGATTTTTTGAACAGCGTGTGAAGCATTCTACA  
 TTCTGAGACGTGTACCAATACCTGGCTACAGTATTTCTTTTCTAATAACTAATAAGCATACT  
 GAATCAATGAAAACCTGGGAAATTTGGTTGATTTTATTATTGAATTCATGGAGGACGTGGATAA  
 GGAAATCAGTGAATTTAAACTGTTTTTGAATGCCAGAGCAAGATTTGTTGCGGAAGCATATC  
 TTGATGAATTTGTCTATTAG

>YGL131C 0.72 Cold

ATGCCTAAAGAAGAAGATTTCCAATTACCTAGAAGAAGAGAGGCTGCTAAAAACGTGAATTA  
 TAATGAAATGGAAATAGATACTAAATTAGTTCAACAAATACAAATAGCGGAAAAAAGTGGTG  
 CTAAGACCAAGGGTAGCAATAGCCAAACTCCCAGGAATTGTAAAAGGACAAGCAATCCAGCT  
 AGTAGAAACGAGAAATTTCAAGTACCAAAAATTCCTTCATGATAAGAATACTTGCTGGAACCT  
 TATCCCTACATTACCCCTTCGTTTCAGAAAGAATAGCAGATTCTCTAACATACTTGATCTAG  
 ATGATGCCATGATTGACTTGAAAAAGATGTCTCTTTTCAATACAGAATCTGTCTTTTATCT  
 GCGAACGACACTATTTATATGATATCAGAGCCTGCTGGCGAGCCTTATTATGTTGGCAGAGT  
 TGTAATTTTTGTTAGTAAACCAGAATTTTCTAACACTATTCATGAAGCTATAAAGACAACAT  
 CGGTCTTCCCTGCTAAATTTTTTCAAGTTAGAATGAATTTGGTTTTATCGTCTTAGGGATATT  
 CAAGAGCACGTAAATACTTTTAAACCAAGGTTGGTGTATGCATCATTACACCAGGACATATG  
 TCCTATTTTCATCATAACAGGGGAAAATGTAGTATATTTTCAATAAAGACGAAGTTTTTGATGTT  
 TTCTAATGAGAAGGAATGCATTATACGACCAATATCTTTTACTTTGATGAACTTTTTTGAC  
 AGATATACTTTGAAATATTACAAAGTTTACAGCACGGATAAAAATATTAAATAAATGGAACAG  
 TAAGTCGCCATTTCTTTATGTTTTGAATAGGAGATTTTCGTTATATCTATACAGAACCAGGAT  
 ATCCATTGGAGAACGTTTTGAAGAAATACGTTTTCCATGAACCTAGAGGTAACGAATTAAGT  
 CCTGCAGACTACCAATGGGATAAAAGATGTCAGTTCTGTAAAGAATGGTGTATCCAAAAGGA  
 GAGCCTTTTCATGTGATGAATGCGGCGTTTTGTGCACATCTATACTGTATGGATCCGCCACTTG  
 ACAGGAAGCCGAACAAAGACGTCGTTTGGACCTGCTTCAGTTGCTTACAGAAACAACAAGGT  
 ACTAAGGACTCGCATGTTAGGTTTCTAGAAGAACAAGCACTGGAACCTGGATTTTATTCGCTC  
 TGTAAGACAAAAAATTGAAGAAATTTCTAGCAAAGCTATCAAAGAGAATGTTGGTTATAATA  
 CCGAAAATTTGCTGGTTTTCAATACTTAGGAATATATTCCATTTCTCATATTGGTGACGCATTA

AATGATTCTATGTTTTTCCATATCCTTTCAAACCCTCTAGGGTAGGAGTGAAGTATCAATG  
 GAACGGATGTAATCATAATGTGCCCTGGAGGCGGAACCTCGTATATAAGTGCAAATTCAGAAG  
 AAGAGCGAGGCTCAACGAAAACCTCGGAAC TAGCATGGGTACTTGATGCATCAAAAATTACT  
 ACTCGAAAATTGAGTGAATATATTGAACAA TGCAAAGCGAAATATGCCCTATTCTCAATGT  
 GAGAGGTGAGACTTGTAATTTTCATTGATGTAGTCC TAAAGAATTTATTATTTACAAATTATG  
 ATACAGCAGAGGCATTTAAAAAATGTA AAAAGGGAGCTTTCCAGAAAATTTTTGAAAGAGCCA  
 AGTTTTACC GCGTGAGATCCGAAAGTTTGAGGAAGCTGTCGAGAAAATTTGGGAGTGAATT  
 ACGCCAGTGTGTGAGTATGTGGGCACTCAACCTATGTGCGATGATTGTTAGATTTTATTACA  
 ATTGGAAAAAGACTGAAAGAGGCCTTACCGTGAGAGGGAAAATTGAGTAAGTTATCAAAGAAT  
 AAAAGAAAAAAGAAATCGCTAATCATGAAAATGACGTAGAGACAAAGTATATAGATGATTC  
 TTCTTTTGATACTGAGAAACTCTCTTTAGCAGAATCCTCCTTCCAATGCATGTTTTGTAAAA  
 CAGATTACTCCCCGATGTGGTATAGAGTTACTGGAGGTT CAGATGATGAAAAGATCAAGATA  
 AGAATGCAGACAGGAGTCAACGAAAAACAGAAATTT CAGAGAAATCGCCTGCCCATAGCAA  
 AAAAATGAAAAACTTGCGCTCTTTGCATTCGTTGTGCTCGTATGTGGCGAAGATACGCAA  
 TTAAGTGGGTACCACCGCTTGAAACATTGAGAAAAATAACGGGAACCTGTCAGAATAGTTTT  
 TATTCAGCGATAGAAGGGATTATAGAGGAGAATAACACAAA CAAGTTTACGTTATCTCCCTT  
 TCAAGCTCATAATAAACTACTAGAATGGGAAC TTGTT CAGGATTCAGAGCTAATTATCAGGC  
 AAAGAATGAAAGTTTACAAGAACC CAAATTCATTTGTGAAAATGAAGCGGTATTCCATGACA  
 TTCCACACGCAACTCTACAAAATGGCTGTGAGATCATATCGAAAGAATGAGTTTACCCCGGA  
 GACGATGCAACGAGATCTTGAGCTATTTATAGAGGACAACAAGAGGTAAGAAAAGCCATCC  
 CTGAACAAAAGCCAGAAAGAGCGAAAAACACAAGGACGAATTTCCCGTGAACATAAATCGA  
 CAATCACCTGGTACTATCAAAA CAAGTGATACAAGCCGAAATCGCAAGTGCAACGATGTATT  
 TATCGAGAAGGCTAGTAATAACAATATTCTAAAATCACTAATGCTTCGAATGATTTGATAG  
 AAATTTCAATTTAAACAGGCGGCAGTTCTTCTGGTT CAGTGTCTGTAGATAAAGGTTTTAAA  
 TTTGTCAAATTTGATAACAAAACATTT CAGCGATTACGGAATAGCTTAAAGTTAGTGAATAA  
 TAAGCTGCCAAAATATAATGAACCTTCAACGAAGAAGATCAAATGATCAATGACATAGCGT  
 TAAGTAATCCGTTAAACGAACCAAACGGGGCATCGTACAATTATACAGTTATTTACATTTCT  
 AAGGAAACTTCTGTGCGCCCTTGAAAAATACCATGATGGTAAATAAACCGAGCAAATGTTAGA  
 GAAAGACATGATTTTGAAACACACTAAGAATAAACCAAAAAATCCTGATACAGCATGGGCAA  
 ATAATAGCGCAAGGACTTTTTTGTAGTGTCTGCAAAGAAAAAATTTAACGACAATGACAAC TAT  
 GAGGTAGTATGTGGTAATTGTGGACTTACAGTACACTACTTCTGTTATGCTATTTAAACTGCC  
 GAAAGATATGAAGAAAAACACTAACCTTAAGACATTTAAATGGTTATGTGACCCTTGTTC AA  
 ATGACCTCAATCCTATAATATCAACGACCTACCAATGTAGTATGTGTCTACGAAGGACTAT  
 GACTATGATAGATATAGGAGCCAATCATTTAAAATATGTCCAGACGCATTGAAATGCACGAG  
 CTTAGGGACATGGGTGCATTTGGTTTTGCTCACTTTTCAATGAAGATATCAAATATGGAAACG  
 GACAATCAATGCAACCTGCCCTTAATACCCTGCTGTGCTTATTTAAACATAGTAGATTTACA  
 TGTGGTGTGTGCAGGATAAATGGAGGTGGGTTAGTGAAGTGTAACAAATGCCAATATAGGTA  
 TCATATTACATGTGCACAGAACAGCTCCAATTTTAAGCTTATGTTTGAAAAGAAAAATATGT  
 CTGTAGACACCCTCTACCGTGCATAAAGGATGTCAAGCTTAACGATACATACACTTTGAGA  
 CCTATACTAATATGCGATAGACACGATATCAGCTTAGAAGGAAACGAACTTTATCCATTATC  
 GTACAAGCCTCAACATACTCTGTCATACATAGAACAATACTGCAGATATTATAAGTGCGAAT  
 CTGACCATAGTCTAGTGGAGTTGAGATATTTTGAACAGCTTAGACTGCGACACGGCGAAATG  
 CCAGGAAACTCACACGACTCTGCTATTTAAACCCAAAATTTACGTACTTCTTTTCGAAAGGAC  
 TTGCCACATTGTGGTACAAAACAAAAGTTTATACTGGTATGAAGATATTATTTGCCATTCTT  
 GCAATTTGAGATCAGGTGCCCAAGAACTCGATTTTGATAGCGCATCTGCTAATATCTCTAAC  
 GATAACGGTTTACCAGTCGAAATTACCAGCAATTGATGGAAGGAATTGAGCCAGCTATGTT  
 TGATATCGATATTT CAGAAGCTGGTACCAGCAAAAATACGCATCCATCAAGCCAGTAA

>YGL094C 0.79 Cold

ATGAATAATTGGCAACATTTCTTCAACAATCCAGTTGATCTTTTCGGAACATTTGAAGAAGCC  
 ATACTTTTCGCTTCGATAATAGGGATAAGGAAATTACAGCGATTAGCTTCGATGAGAAGGCAA  
 ACTTAATTTGGAGTGGAGACAGCTATGGTTGCATTTTCGTCATATGATCCAACTTTTCAACTT  
 TATACAAGATATAGGGGCCACATAGGTGGAAATTC CGTGAAGGATATTCTCAGTCATCGGGA  
 TGGTATTTTATCTATTAGTGAAGATTCCTTACACTTTGCTAATAGAAGAGGTGTTACTAAAT  
 TGAACCTCACTAGCATTGATATTGCTGCATTTAGCGAATTGAACACTATGTGCTATTCTCCT  
 CATTCACTGAAAAACAATATCTACTGTGGTGGTGACAACACAAATTTGGGGAATTGCGTCCAT  
 TGACTTGAACAGAGGTTGCTTAGATTCCTCTTGAATTACTCATCTAAAGTGAAGTTAATGT

GCTCTAATAATAAAGTTTTGTCTATCGGAAGACAAACAGGGACTGTGGATTTGCTAGATCCA  
ACATCGAATCGTACTATCAAATCATTTAATGCACACTCTGCATCCATATCCGCTATGGATTT  
ACGGGATAACACCTTGGTTACAGTAGGGAAGTCCAAAAGATTTTATAACTTATACGCTGACC  
CATTTGTGAATGTTTACGACTTGAGAACAATGCGTCAACTCCCTCCTGTTTCCTTTTCTAAA  
GGAACAACATATGGGATCTGGAGGCGCAGATTTTGTTC AATTACATCCTTTGCTTCCTACTGT  
TATGATCGTCGCCTCAAGTTCTGGTTCGTTTGATTTTCATCGACCTTTCCAATCCAACCTTAA  
GAACACAATATGTTTCATCCTTGCCAGTCGATTAAAAAGTTATGTTTGTCCCCCAATGGTGAC  
GTATTGGGTATACTAGAAGCTGATAATCACCTAGATACATGGAGAAGATCATCAAACAACAT  
GGGAATGTTTACCAATACCCCTGAAATGCTAGCATATCCTGATTATTTAATGACATTACCT  
CTGACGGCCCAATATCTGTGACGATGAAACATATCCATTGAGTTCTGTGGGGATGCCGTAC  
TATCTTGATAAACTTTTGTCTGCATGGCCCCCTGTAGTGT TAAAAAGTGAAGGTACCATACC  
GCAATTAACAGGTAAGTCAACCTTACCATCGAGCGGCAAA TAAAAAGTAACCTTGCTGTGA  
TCTCGAGCCAAAA TGAGAAGTTGAGCACACAAGAATTTCTTTGT TAAAGATATGATCGCACC  
AAATACGGTATGAGAAATGCTATACCAGATTACGTTTGTCTAAGAGATATAAGGAAACAGAT  
AACAGCGGTTTAGAAACCAGCGATATACAGACATATACCTCAATCAACAAGTACGAAGTAC  
CCCCTGATACAGTAGACTTCCACTGACATCAGGTAGATTTGGTACTGATAATTTTGATTTT  
ACGCCCTTTAATAACACTGAGTATTCAGGATTGGATCCAGATGTTGATAATCACTACACAAA  
TGCTATCATACAATTTGTATCGCTTTATTCCAGAAATGTTTAAATTTCTGTTGTTGGGTGTTTGA  
AAGACGAGAATTTTGAAACAACGTTGCTAACTGATCTAGGCTACCTCTTTGACATGATGGAA  
AGATCACATGGAAAAATATGTAGTTCTTCCAATTTTCAGGCGTCATTGAAATCCTTAACTGA  
TAAAAGACAATTAGAAAACGGTGAACCACAAGAACATTTAGAAAGATATTTAGAATCGCTGT  
GCATAAGGGAAAAGTATCGAGGATTTTAAATCTTCTGAAAAGTATTA AACGCAATATGCCCTCAA  
AAATTTAACAGATTCCTGCTCTCGCAACTTATTAAGAGGAAGCGCAGACAGTCAACCATAA  
TATCACCTAAATCAATGCTTTGGTTTTGAAAACGGAAATACGAACAGAGTGTAGCTGTGATC  
ACTACGACACTACCGTCAAACCTTCTACCCTCCTTATCAATATCAGGAATCAACAAAACCGTA  
ATCAAACAATTAACAAGAAAAGCAATGGACAGAATATTTTGCCTTATATTTGAATATGCCAT  
GAAAAATGTAACCCAAAAGAACAGTATTTGCCAACCTGCGGCAAAACCGAAACTATCACCC  
AGGAGTGTACTGTCAAGAATTTACCTT CAGTGTTGT CATTAGAATTATCACTATTAGATACC  
GAATTTTCCAATATAAGGTCGTCGAAAAACTGGTTAACTAGTGAATTTTATGGAAGCATCAT  
TAAAAACAAGGCAGTTCTAAGATCGACGGCGTCCGAATTGAAGGGCACAGCCACATATTTA  
AATACGAATTTGAATGGTTACGTGGCTAAAATCACTGATAACAATAACGAGACGCGTCTAGTA  
ACATATGTCAAAAAATATAATCCAAAAGAGAATTGCTTCAAGTGGCTCATGTTTAAATGATTA  
TTTGGTTGTTGAGATAACAGAGGAAGAGGCGCTTAAAATGACATACCCCTTGAAAACACCAG  
AAATTATCATATATTTGTGATGCGGAAGAATTACGAAAACCTTTCTTTTCTGTTGATACGTAT  
TCCATCAACTATGACATACTTTTCCGTGATTATTTTCGCAAACGGAATAAGAGATACTGCAAG  
ACGTGAATATAAGTTATTAACACATGATGAGGCACCTAAATCTGGAACCTTGGTTGCCATTG  
ATGCCGAATTTGCTCTCATTACAAAGTGAAC TATGTGAAATCGATCATCAAGGAATCAGAAGT  
ATTATTCGACCTAAAAGAACTGCTTTGGCCAGAATATCCATTATTAGAGGCGAAGAAGGAGA  
ACTGTATGGAGTACCATTTGTCGATGATTATGTGGTAAACACGAACCACATAGAAGACTATT  
TGACAAGATATAGTGGGATTTCTCCTGGTGACTTGGACCCTGAAAAGAGTACCAAAAAGCCTT  
GTGAGAAGAAACGTTGTATATCGAAAAGTCTGGCTTTTAAATGCAGCTCGGATGCGTATTTGT  
TGGTCATGGTTTTGAATAATGACTTCAAACACATTAATATTAATGTCCCAAGAAACCAAATTC  
GCGACACTGCCATATATTTTCTACAAGGAAAGAGATATCTTTCATTGCGTTATCTGGCATAT  
GTGTTGTTAGGAATGAATATCCAAGAGGGAAATCACGATTCAATTGAAGATGCCCATACTGC  
CTTGATTCTTTACAAAAAATATCTCCACCTGAAAGAAAAAGCTATCTTTGAGAAAGTACTGA  
ACAGCGTGTACGAAGAAGGAAGAGCCATAATTTCAAAGTCCAGAAACTTCAAAGGGATAA

>YPL154C 0.82 Cold

ATGTTTCAGCTTGAAAGCATTATTGCCATTGGCCTTGTGTTGGTTCAGCGCCAACCAAGTTGC  
TGCAAAAGTCCACAAGGCTAAAATTTATAAACACGAGTTGTCCGATGAGATGAAAGAAGTCA  
CTTTCGAGCAACATTTAGCTCATTTAGGCCAAAAGTACTTGACTCAATTTGAGAAAAGCTAAC  
CCCGAAGTTGTTTTTTCTAGGGAGCATCCTTTCTTCACTGAAGGTGGTCAAGATGTTCCATT  
GACAAATTACTTGAACGCACAATATTACACTGACATTACTTTGGGTACTCCACCTCAAACCT  
TCAAGGTTATTTGGATACTGGTTCCTTCAAACCTTTGGGTTCCAAGTAACGAATGTGGTTCC  
TTGGCTTGTTCCTACATTCTAAATACGATCATGAAGCTTCATCAAGCTACAAAGCTAATGG  
TACTGAATTTGCCATTCAATATGGTACTGGTTCCTTTGGAAGGTTACATTTCTCAAGACACTT  
TGTCCATCGGGGATTTGACCATTCCAAAACAAGACTTCGCTGAGGCTACCAGCGAGCCGGGG

TTAACATTTGCATTTGGCAAGTTCGATGGTATTTTGGGTTGGGTTACGATACCATTTCTGT  
 TGATAAGGTGGTCCCTCCATTTTACAACGCCATTCAACAAGATTTGTTGGACGAAAAGAGAT  
 TTGCCTTTTATTTGGGAGACACTTCAAAGGATACTGAAAATGGCGGTGAAGCCACCTTTGGT  
 GGTATTGACGAGTCTAAGTTCAAGGGCGATATCACTTGGTTACCTGTTCTGTCGTAAGGCTTA  
 CTGGGAAGTCAAGTTTGAAGGTATCGGTTTAGGCGACGAGTACGCCGAATTGGAGAGCCATG  
 GTGCCGCCATCGATACTGGTACTTCTTTGATTACCTTGCATCAGGATTAGCTGAAATGATT  
 AATGCTGAAATTTGGGGCCAAGAAGGTTGGACCGGTCAATATACTCTAGACTGTAACACCAG  
 AGACAATCTACCTGATCTAATTTTCAACTTCAATGGCTACAACCTTACTATTGGGCCATACG  
 ATTACACGCTTGAAGTTTCAAGGCTCCTGTATCTCTGCAATTACACCAATGGATTTCCAGAA  
 CCTGTTGGCCACTGGCCATCGTTGGTGATGCCTTCTTGCGTAAATACTATTCTATTTACGA  
 TTTGGGCAACAATGCGGTTGGTTGGCCAAAGCAATTTGA

>YDL044C 0.79 Cold

ATGATCAGAACATCATCTATATTAATAAACTGTAACTATAGATACATACATTGCATCCATAG  
 ATGCTTGCTGAATGAAGCCAATTTGAAAGATAGAAAACCTCACAACGTAGAAAGAGTTTCAA  
 ATGAAAAGACATTTGAACAAGCTCTCGAAGAGGAACGTAAGGTATTTGGAGAACTATTCGAA  
 GCTGGAGCAAGGGTTGAAAACATGAGGCACACTAATGCTAGCAAAAATAATTGACAAGTATTA  
 CAATGGGCTACAGGACAACCTCCGAGGGAACTAGTGTAAGAAAAGAAAAAATTGTTTTTAACC  
 ACAGTCAAAGAGCTCAAAGGAAGCTTCCAAAATAAGGACCATGAATTCCTGAAGGAAAACAGCA  
 GGCAATGACTATGTCTACGAACGGGCAGAACCCTTCTGCTATTAGCACTAAAACGATAAGTGA  
 GCAGACAAGAACCTTGTCTGGAAAAGATATTTGACGAAGATAATAGCATTAATAAAAGCAACA  
 GAGAATTGCTGAATCTTAATCTGCGCAAGGGCTCGGGAATGGAAGCTTTGAGGCAGCCAGTT  
 GCACATTTCAAACGTCAAATTTAGCGAGGAAGTGATGCAAGAAATTGGTAATAAGATTCGGTA  
 CCAAACCACACTGGATCAGGTTTTAGAACCTCACATTGACTACTTGAAGGAAAGCTGTTAAAA  
 GTGATTACGATCTTTTAAAGATACCTAAAGCAATCACTAGACATTTACAAGAAAAGGAACAAA  
 GACCTAGAGTTAAAGATGAATGCAGAATCTTCAAACATTTTCGAAGACATTAGAAGTGCGTG  
 TATAATAAAACCGGCAGAACTACCGAAACCGCTTGCAATGACTTTACCATATATTATAGTCA  
 AATCGCTTAGATTAGGTGACTTTGATTTCCCGGCAGACAGAAAGTACACATTTGATCTCCTAT  
 GTTTATAATGAATGTAAAACAACATGGACGCTTCACTGTACCTAACAATTTGTAATGTTGA  
 TTTCTACAATTTGCTGGTTCAGCTATTGTGGGAAAACCTCCAGGAGATTCGCTACTTGAGAC  
 GTGTGGTTACCGAGATGAGCGTTAATGGTGTCTCGGAAATATTGAAACCGTGGATATATTG  
 GATAAGATTGTCAAAGAAATGAGAAGTTTAAATGAGGATGTCTTTCTTGAAGCAGGAGAACA  
 GCTCAGTGCAGATGAGGAAGTTTCGTCCAGCGCAAATAAAAATAGTGAATGTAGGTGTTTTAT  
 GGAATAAAGACACGAATAATGACTTACTAATTGTTGAAAATTATCTCAAAGCCTCAAAAAA  
 AATTTAACTAGAGACAGGTAG

>YKL221W 0.81 Cold

ATGTCGGAAGAACGGCATGAAGATCATCATAGGGATGTTGAAAATAAATTGAATTTAAATGG  
 TAAAGACGATATTAACGGGAATACCTCAATCTCGATCGAGGTGCCTGATGGAGGATATGGGT  
 GGTATTATTCTTCTTGCTTTTATTCTGTACAACTTTTCTACTTGGGGGGCAAATTCGGTTAT  
 GCTATTTATTTAGCGCATTATTTAGAGAATAAATACTTTTCTGCTGGTGGGAGTAAATTAGACTA  
 TGCTTCTATAGGTGGGTTAGCATTTCAGTTGTGGACTTTTTTTTGGCCAGTTATAACATGGC  
 TTTATCATATATTTCAATTCATTTAATGATTAGGCTTAGGGATACTGTTTCAAGGGGCAGCG  
 CTACTGCTTGCAGCTTTTTCTGTCACTCTGGGAAATTTATCTCACGCAAGGCCTTTAAT  
 TGGATTCGGTTTAGCATTATTTTCATACCCAGTGTCACTCATCCACTATGGTTCAGAA  
 AATAAAGATCTTTAGCCTCTGGTATAGGAACTGCTGGAAGCGGGTTAGGTGGTATTGTCTTT  
 AACTTGGGAATGCAAAGTATTTTACAAAAGAGGGCGTTAAATGGGCGCTCATTGCTCAGTG  
 CATAATATGCACATCACTTAGCACCATTGCGCTTATGTTGACCAGAACAACACATCAAGGCC  
 TACGTCAACATAAGAGATCTTACAAATTTGAATTGCTAGATTATGATGTGCTTTCAAATTT  
 GCGGTCTGGTTACTTTTTGGATTTGTATCATTTGCTATGTTAGGATATGTTGTCCTTTTGTA  
 TTCTTGTCTGATTTTACCGTTAGTTTAGGTTATACTAGTAAGCAAGGCTCATACGTATCGT  
 GCATGGTGAAGTTCGGCTCTCTGCTGGGACGACCAATTGTGGGTCACATTGCTGATAAATAT  
 GGATCACTAACAGTTGGCATGATATTGCACCTTGTCTATGGCCATCCTTTGTTGGGCCATGTG  
 GATACCTTGTAATAAATTTGGCCACTGCGATACGTTTTGGATTATTGGTTGGTCTATTATGG  
 GAACAATTTGGCCAACAATGCTTCAATTTGTTACACGCATTGTTGGTCTTCAAAGCTTCCT  
 GGTACCTTTGGTAGTACCTGGATTTTTATGGCGGCTTTTGCCTTAGTTGCCCCATAATCGG  
 TCTGGAACCTCGTTCAACTGATACGAATGGAAACGATTATTATCGTACAGCAATATTCGTGG

GTTTTGCGTACTTTGGTGTAGTTTATGCCAATGGCTATTGAGAGGGTTATAATAGCTCGA  
 GATGAGATTGCTGTGCGTGAAGCCTATTCAGCTGACCAAAATGAATTGCATTTAAACGTTAA  
 GTTATCACATATGAGTAAATGCTTTTTTTCGTTATAAACAATTACCTAGGAGAGTCTAA

>YBR045C 0.79 Cold

ATGGAACTATTTTGCAGCCAAAGGCTAGACCATTTGAGTCTTTGAAAAGAAAACGTTTTAG  
 AGAATGGTTGAGGCCGTCGACTGCGCATGGATCCCTGTTGCATTCTGATACATTAGATTTGC  
 GTGACTTTGCAAAACCTAATCCCGCTGACACATTTTCTAATCTTGATTCTGGTCATTGTCCT  
 TTGGTCACAACCTCCAATAAAAATATGAGTGCCAGATGGAAAGAGTTCTTTTTTCCGAGGAGA  
 CACTAAATTTGAAACCCTGTTTCAGTAATAGAAAATTCTATGAGTTCAAAGATAATTTGAAAA  
 GGGGATTGAAGAAAATACGTTCATGGGAGAAAACGGACATCAAAGCGAAAAGAGATGTCCAGTT  
 GTTGAAGAAAACAAAAAGTCTGTGTGAGATAATCTGGACAAAACAGACAATAATACGCCCTG  
 TTTTCGACAGATTTCCACACAAAATTCGAAAGAAATTTGAAACGCAATTTGATCATTCAAATAGGA  
 GCCAAAATTCGAGAAGGCTTATCTAGACAATGAATCCTGTTGGAACCTAAGTGAGAAAATTT  
 ATTCCTTTTAATAATTTAAAAATATGAAGATTTGAAACATTTTGAAGAGAATTTGCAAAGCTT  
 AGCGCCTGCAACTTTTACTCCAATTGAATCAAATGAATCGCTTGATAGGTCAGATTCGACAC  
 GTGGCACAAAACGAAGCATTTCGCAATGATTCCAGTGATACAACATCTGAAAAGAGGCTATGC  
 TTAANAACAATACTCAGATGAACCTGAATCGGATCATTTCGATGGAAAGTACACCATCCATTTA  
 CATTACCAAAGAAGTTCAAGAAAAGAATTGAAGCATTAAAGCTCCACGGATTCGTTTTTAATTG  
 AAAAAAGTAGATTTTCCCTCTAACAAAATTTGGTTCCAGTGCCCTCCGATTATGAAAGTGATAAC  
 GAATACAGAAATATGGATGAGGATTCAATAAACGATGTTACCACTGAGAAAAGAGGGAAAATGT  
 GGTACATACCAGACTCTAATACTAGCACGGTGGACGCAATGGAAAACCAATTGAAGTGAGCT  
 CGGCCTTAAAAGATGATACATTGGATAAAAGACATAGATGATGCGAGCAGTAGCTATTCGGAT  
 GATGTAGAGACCACATTCGAGCCAGTTGAATCTGAGGAACTTTCCGATTTATCTGATACAAG  
 CTCAAGTGGAAGTAGTAAAATTTATACTATCCCCACATTTTCGCGGCCTTACTAATAGGACCA  
 ATATATCACAAAATCTTTTCAAAGTTGGTAAAGCTGATTTAAGCCAAGATAACTTAACGCAT  
 TTGATCAAAGTCATCAAAAAAAGAAAAGATGCGTGAATTTTAGAAAATAAAAGATTCTATGA  
 TGCTTTCAATCCATATGTTGATAACGAAGAAGATGCAGAGTTATCTGACAGCGAAAACATTT  
 CAGAAATGGATACAGATCTTTGTATAAAGGATCGGAGTACCTCAAGTGTTAGGTTTGATGAA  
 AACTCACGTCTTTAATCTACAAAAAATCTAAAAAGTTAAACAAAGATGAGACTCAAAGTGG  
 TTATTCGACTACTGAAATGAGGTCAATTTCTAAAGACAAAGATGAATTCACAGCATGATGAGG  
 AGTCTCAGAGAGCTTCGAAGTGTGACACAGTAGGTGTAGCCCAATTTTTTACATTATTTTCAA  
 TATACAGAGTATAAAAGGCAGAGAAATGAAGCAGAAATTATAGACTGA

>YPL216W 0.76 Cold

ATGGTCTGCTTAACAGAAGGAAAATACAACCTAAGGAAATAGGACAGTCTGCTGATTCCTT  
 CTCTGAAACTCCATGGGTGATTAAAGAAAGTAGCGAGCGTATAAATGATTATGACAGTGATT  
 TAAAAAAGCTAGATTTTTTACAAAAGGGATATATTCACCTGTGAGATTAGTGAAAAGATGGC  
 CTTTCGTATTTCAAGGCGTTAAAAAGCGAAGAACAGCACCGTGAAAAGGTCAGATATCTTTT  
 ACCAAAAGAACTAAGGAAGGCTATAGCAAATTTTCGCAAACTTCAGTCCGATAAGGAAGGTAG  
 GACACCTTGTAGAAAGCGCATTTTCAGCGTTTTAGTAACCGTTTTCTTTATAGGCGATACGGTG  
 TGCTTGAAAACCTATCCAAAAAATGCATTGATTACCTATAAAGAAGGAGAGCCCTAACTTGGT  
 AGAATCACCAACTATTGAAAACAATGTCACGTTGTTTCTTGTCAAGGATGTGTTTTCAATCTA  
 ACGGGATGATGAAAAGTAAAAGGGAGAAAATTTCTGCCCCAAAATTGTCACGTGATTTAATC  
 ACAGAATGCCTGAATCGAGAATCTAAAGGTGCGGCCCTAATTGTAGGCCAGAATGAAATTA  
 AAGGCCAGAATCACACTTTTCTAAATTCATAATTGCGTGTTTTCTTAATGAAATACTCATAA  
 AAGTATCGAATAAGGAGCACGCACCATGGAGGGTGAACAAGAATATATAGAAAGATATGAT  
 GTAAACCCTAAATGCTCTCCTAATATGATTGATTATTTGCCGGATAGAATGAACTCATCTTC  
 TTCCGAGCTTTACACTCCTCTTACTATAACCACCAGAGAGCGATGTTGAACCTGCTGACTGGA  
 AGGAAACGTCGGAAACGTCGGAAACGTCGGAAACGTCATATCTAAAATAAAAGCAATTGAC  
 GACGAGATTTCAGTCTCATTGACCACATTTACGATAATGTGAACTCCCTTGCCCTACAATGA  
 TTTGAAGGGAACCGTCGACGACAAGGAGCTTCCATTCCTGGGCCTTCGATACCATTTGAAA  
 ATATCAGCTACTTAGATAGCTCCTTAGAATATAAGAATATCGATCAAAAATGGTTCAAAGAG  
 TGCAGTCAATTTCCAACGGAACGACTATTGGTTGTTTATCAATTCCTGAGCTTTTTTGGACG  
 TTTTATTGGTCTATCACATTTTAAATTTTATGATCAGTTTCTTACTACTATCAAGTGTACTAGTC  
 CGGAGGCTTTAGTAGATGAATATGTCAAAAATAACTTTCTTAAACTTACAACAGCAAAGGG  
 AGTTTCACAAATGAGAAGCCAAGAAACGAAAATATATAATCAAGTGACCAGTAGTAACGTATC

CCAGCGTGAGAAGGCTAACGCTTTAATGCAGATGAGAGTCAACGAATACCTAGCAATTTCA  
 CCAGAAACCAGAAAATGAGGAAATTTATAACGGATAAAAAGTACTGAATTTGTAATGTATTC  
 ATTTTTAAAGGGAAGCCTCTAAAAAATGACGATATGGAGTTTCAATCGTACGAAAAAGTGAA  
 TATACTTTACATTGATATAGTTTGCTCGTTAATGTGTCTGATGACGGATAATGAACCTGATT  
 GGAATTGTAATCTGATGGACAATTGGACTGAAGAAAAGCGAAAGGAGGAAGGAAATAAAACA  
 GAAATTGATATAGCTATAGAAAAGTGTGTTGAACTATGGAGATACTAGCTGGGTAAACTTTT  
 GCACAATAAAAACTTTAGCAACGGCAATTGGTTGATCTGTCCTTGGAACTTTGCAACAGA  
 ATACACATATGATAGCATATAGTGATGTCGCAAAATGTATCACAAAAAATACTACCTTTA  
 TCCATGAATTTTGTAAATTTAGGTGATGAGCTCTGGGATAACTTTGCAAGAGATTATCTAT  
 AAAAGATAAAATGATGTTTTATGGGTTCTCGTAGATTTTGCCTCAATTTCTCGAGTTATA  
 TTAAGGAGTTGGTAGATAAAGTACCAAACTGTGCAATGGAATCCGCTTAAAGTTGGATAGT  
 GCAAAAAAGAGTATATCAAAATGAAACGGCAACTAAAAACGTTAACCAAAAATCGCGTGAA  
 GCTTCACAGCAACGTTTTCAATGAACCGATATGGATCAGATGAATGTAAAGGTAAGGTCAATG  
 CCTTAAAGTGAAAATTGCATACTTAATGGAAGATATCGCCTTCTAGAGGCAAAATTGATT  
 CAGAGCGATATCAAGAGACTAGAGATTTTGGGTAAAGATAGAAATGGAAATCGATATTATTG  
 GATGGACTCAAAATGGATCGTCATCAGCCATCAGTGAAAAAAATGAGGAACTTTACAACCTGCT  
 GTTTTTTGTGGGTTCAAGGACCTCTGAAGCGGATATAAACTTTTTGCTTAGATGTGACGTC  
 GAATCTTTGAAAAAATGGGAGTTGTTAGCTAAAGCAAAAAGTACTGCCTACGCGACAAAAGA  
 AGTCTTTTTCAATATTTAGGTGACAGACGGGTCTTACTATCAAATTGCTCAAGGTGAGAATT  
 TCATGATAATTAATTCAAACGGTATCTTAATGAGGCCAACTATTCCGGCATTATAGACAAA  
 AAAATTATATCAGAACTCCAGAAAAGCTCCTACTCTCTCATCATCAATGGGCTTTCTTCAA  
 CGATATAGAAGATATACATATGTTAGTAGATAGGTTGGATGATTTAAGAGAAAATGAGGGAC  
 AATTGAAGAAAAGCTTTGACATCCAAAATGGACCGTATTGAAGTATCATACAAGCAACAGTTC  
 AAAATTAAAAGGCGTATTGAATGTGATGAAACCTTCAAAAAAATCACAACTTTTGAAAAA  
 TAACGAGTTCACGTTTTCTGAACTGAAAAGAATTGAGACAACTTGTACATCCAACGGCCAAC  
 ATTTTTCCAACATGGAGAAAATTTCAAAAAACTATCAAGGACAAAGAATGATCTCGTTTTG  
 GAAGCGATTTTAAAAGACGTAGCTCACCTTGGAGAATGTGAAAGAGCACTTCTCAAAAAGCA  
 ACAAATTTGATTTATCCTTTGAATTTTCATTTGAAACAATTGAGGACGATAGACCTCGAAT  
 TTATAGTTGAAACGAAAAGAAAAGGCAAGAGGATATTCTTACGAAGCTTTTAAATCATCAG  
 AGGTATAAGCATATTAGTCATGTTTCAGGCTATGGGATAAGTTCTCAACGAGTAGATAAAGC  
 TGCACATCTTGATGTGCAGGGTATATTAGAGGAGATTGAATGTCAACTTATTTCAAGACGAC  
 GAGAGGATGAAGAACGCAACTAG

>YPR136C 0.75 Cold

ATGCAAGTAAGGTTATTTTTCCCCTACCCTGGTAAAGCTCTGTTTTGCTTCAGATATTAGAAG  
 TTTATCGCCAAAATATCTGAAGACTCGGCCCTGCTGTTTCAGCAACGCTTCTTTTTAACCTGG  
 ACGCAATGATATCCTTATCCAAATCTCCAGCATCAAAATGTTGTACTCGTCGATTGTTCTT  
 TCCTTGAGATTGTTTAAATCTTTTTCTTCAGCGTTCCTATTATCAGTTAAAATGTCATTAGC  
 TTCGTTTTTCAGATTCTCCAGATATTGCTTTGCAAGCCTCCTTCTTTTATCGGCTGGATTTT  
 CACCCTCGAATCTTCTTCAGATTCCAATGCGTCTTCTTCATCCGAAACTTCTAGTTGTTCA  
 TCTTCGTTTGAGGATGGATCTGTGATTTCTTCGTCTACTGTGGGTTTTGATGGATTAAC TTC  
 TCCTTTGGATCTTTTCTCTTTTCTGTTGGGTAACATCTGACATCTTTTCTAGATTTTCTA  
 TAATTTTGAAATGCTAA

>YDR267C 0.82 Cold

ATGGCGTCTATCAATCTGATTAAGTCTTTGAAACTTTACAAGGAAAAGATATGGTCTTTTGA  
 CTTTTCTCAAGGTATATTAGCAACAGGTTCAACTGATCGAAAAATTAAGCTAGTTAGCGTGA  
 AATATGACGATTTTACGTTAATTGATGTGCTAGATGAGACTGCTCATAAAAAGGCGATTCTGA  
 TCTGTGGCGTGGAGACCTCACACTTCGCTGTTAGCGGCTGGCTCTTTTGATTCCACTGTATC  
 TATCTGGGCTAAGGAAGAATCTGCTGACAGAACTTTTCGAGATGGACCTGCTAGCTATTATCG  
 AAGGTCACGAAAATGAAGTAAAAGGTGTAGCGTGGTCAATGATGGATATTACCTAGCAACC  
 TGTTCAGAGATAAAAGCGTGTGGATATGGGAAACAGATGAAAGTGGCGAGGAATATGAGTG  
 TATTAGTGTTTTGAAGAACATTCACAAGACGTTAAACATGTTATATGGCATCCATCTGAAG  
 CATTACTGGCTTCAAGTTCTTATGATGACACCGTCAGGATATGGAAGACTATGACGATGAC  
 TGGGAATGTGTTGCTGTCTTAAATGGCCATGAAGGAACTGTTTGGTCTTCTGATTTTGACAA  
 GACTGAGGGCGTGTTTAGACTGTGCAGTGAAGCGACGATTCCTACTGTACGGGTATGGAAAT  
 ACATGGGTGACGACGAGGATGATCAACAAGAATGGGTTTGTGAAGCTATCTCCCGGATGTA



CACAAAAGACAGGTATACAATGTTGCATGGGGCTTTAATGGCCTCATTGCTAGTGTAGGAGC  
 GGATGGAGTACTAGCGGTCTATGAAGAAGTAGACGGAGAATGGAAAGTTTTTGTAAACGTG  
 CATTATGTCATGGAGTTTATGAAATCAACGTTGTGAAGTGGTTGGAGTTAAATGGTAAACT  
 ATACTTGCAACAGGCGGTGACGACGGGATCGTAAATTTCTGGTCTCTAGAAAAAGCAGCGTA  
 G

>YOL132W 0.79 Cold

ATGATGGTTTTTTTCGAGCACCTTTATTTTTCTAATTTTTGGAGTTAGTTGTACTGTGTGAAGC  
 TTCAGTCCACACCATTCAAATTAAGGACAAGCATTTCGTTGACACAGTACTGGAAAACCAT  
 TCTTCATCAAAGGTGTGGATTATCAGCCAGGAGGCTCTTCCGACGTTAGTGAAGAGCAGGAT  
 CCGTTATCCAATCCAGATGCATGCGCTCGTGATATTTTATTATTTCAAGAATTGGGAATAAA  
 CACAGTAAGAATTTATTCTATAAACCCGGACCTGAACCATGATGCGTGCATGACTATGCTCG  
 CAATGGCAGGTATCTATCTTATATTGGATGTCAATTTCCCATTTGCAAAAACAGCACTTAAAC  
 AGATATGAACCTTGGACTACCTATAATGAAGTTTATTTAGAACACGTTTTCAAGGTTGTGCA  
 ACAATTTTTCTCATTACAATAATACTTTAGGATTTTTTGTGCTGGGAATGAAATTGTAAACGACA  
 AAAGATCAGCACAAATATTCTCCTGCCTATGTCAAGGAGTTGATTGGAACATGAAGAATTAC  
 ATAAGCGCACACTCGCCAGAACAATTCCGGTAGGTTACTCTGCTGCAGATGACCTGAACTA  
 TAGGGTATCACTGTCCGAATATTTGGAGTGTAAGATGATGATAAGCCAGAGAATAGCGTTG  
 ATTTTTACGGAGTTAACTCCTACCAATGGTGTGGCCAACAACTATGCAAACTTCAGGGTAC  
 GATACATTGGTGGATGCTTACAGGAGCTATTTCCAAGCCAGTTTTTTTTTTCAGAATTTGGATG  
 CAATAAAGTATTGCCAAGGCAATTTCCAGGAAATAGGTTATTTGTTTTCTGAGGAGATGTATT  
 CAGTATTCTGTGGAGGTCTGGTTTACGAATTTTCACAGGAGGATAATAATTATGGGTTAGTT  
 GAATATCAAGAAGATGATTCAGTACAGCTCTTAGCAGATTTTGAGAAGCTTAAATCGCACTA  
 CCAAAACATTGAGTTTTCTTCTATGAAGACTTTAAAGGAAACTGTTTCAGATGGAGGAGACGC  
 CATCATGTGCGGAAGATTATGAAAATTTGAAGATTGAATCTAAAATTTGCTAAAAATTTAGGA  
 AGTTCTTTTGATAAAAAAAGGCGTGAAAGTTGAAAAAGGCAAATACATAGATATTCACGAGGA  
 TCAGCTGTCCACCAATGTCACGATTTTAGACAAGCATGGTGACAGATGGAATGGGCCCAAAA  
 AGATTGAAATTAGCAAAGCCTGACATTGGCAGACCTGGAAGGAGAAGAACAAGAAGACGCA  
 GATGAAGACAAAGATGATTTAAAACGAAAACACCGGAATTTCTGCCTCTATTTCCGGCCCAT  
 GTTACCTCTTGGGTTGTGTTTGCTTTTTTTTTACTTTTAGTTTATTTTTTTAG

>YIR030C 0.73 Cold

ATGGAACAAGAATACTTGTGTGAATCCTAATAGTTTCGAAGTCAATGACGGTGTCCCTGCG  
 GGAAACCATTGAAAAGACTTTTTCAATGGAATCATGTAAAATCAGTTATTTACAGGGCCAG  
 ACACGTCGCCACCACAAATTGATGGGCAGGAAACAAGTATTTAAAAGTATGGAGGCCTGTCTT  
 CCCCTCTTAATTGATGACCAGGAGTCGGTATATTACTTTTCAGAAATTCACGGGATATTAAT  
 TGCCCTGTTTTTTCAGATCATCCTTTGGTAGCAAAGATAAAGGATAGAGCTGCTAAAGAAAAAG  
 CAGATGTTTTCTATTGTTGGGTTATTAGATAGTAGTATTAATTATTGCAATTTGGTTGGAAAG  
 AAGTCTCTATTATTACTTCAAATAAAGAATGGATTCCAATATTGAATAACTCTGTGGAATC  
 GAAATTCCTTGACAGGGAATACAGTTAACAAAAATTTATGGAAGGTACGGTATCTACTGATT  
 TACAGGTCCTCGACCTACATAGTCCAGAAAAATTTCCAGCAGATAGCAGAAATTATATATCGC  
 GAAAATATTTAAAAGCTTGATTCAGACATTGTAATATTAGGTTGTGCAGGATTCTCGGGTTT  
 GCAAAATAAACTGGCGAAAACATTTCAAAGGGATGGCACGCTGTTTCTGGACACGATTGAGA  
 TCGGTTTACAGATTCTAATCACTATGATAAGATTTGTCAACTCACAAAAATAA

>YMR220W 0.81 Cold

ATGTCAGAGTTGAGAGCCTTCAGTGCCCCAGGGAAAGCGTTACTAGCTGGTGGATATTTAGT  
 TTTAGATACAAAATATGAAGCATTGTAGTCGGATTATCGGCAAGAATGCATGCTGTAGCCC  
 ATCCTTACGGTTCATTGCAAGGGTCTGATAAGTTTGAAGTGCCTGTGAAAAGTAAACAATTT  
 AAAGATGGGGAGTGGCTGTACCATATAAGTCCAAAAGTGGCTTCATTCTGTTTCGATAGG  
 CGGATCTAAGAACCCTTTCATTGAAAAAGTTATCGCTAACGTATTTAGCTACTTTAAACCTA  
 ACATGGACGACTACTGCAATAGAACTTGTTCGTTATTGATATTTTCTCTGATGATGCCCTAC  
 CATTCTCAGGAGGATAGCGTTACCGAACATCGTGGCAACAGAAGATTGAGTTTTTCATTTCGA  
 CAGAATTGAAGAAGTTCCCAAAACAGGGCTGGGCTCCTCGGCAGGTTTAGTCACAGTTTTAA  
 CTACAGCTTTGGCTCCTTTTTTGTATCGGACCTGGAAAATAATGTAGACAAATATAGAGAA  
 GTTATTCATAATTTAGCACAAAGTTGCTCATTTGTCAAGCTCAGGGTAAAAATTGGAAGCGGGTT  
 TGATGTAGCGGCGGCAGCATATGGATCTATCAGATATAGAAGATTCCCACCCGCATTAATCT

CTAATTTGCCAGATATTGGAAGTGCTACTTACGGCAGTAAACTGGCGCATTTGGTTGATGAA  
 GAAGACTGGAATATTACGATTAAGTAACCATTTACCTTCGGGATTAACTTTATGGATGGG  
 CGATATTAAGAATGGTTCAGAAACAGTAAACCTGGTCCAGAAGGTAAAAAATTGGTATGATT  
 CGCATATGCCAGAAAGCTTGAAAATATATACAGAACTCGATCATGCAAATCTAGATTTATG  
 GATGGACTATCTAACTAGATCGCTTACACGAGACTCATGACGATTACAGCGATCAGATATT  
 TGAGTCTCTTGAGAGGAATGACTGTACCTGTCAAAGTATCCTGAAATCACAGAAGTTAGAG  
 ATGCAGTTGCCACAATTAGACGTTCCCTTTAGAAAAATAACTAAAGAATCTGGTGCCGATATC  
 GAACCTCCCGTACAACTAGCTTATTGGATGATTGCCAGACCTTAAAGGAGTTCTTACTTG  
 CTTAATACCTGGTGCTGGTGGTTATGACGCCATTGCAGTGATTACTAAGCAAGATGTTGATC  
 TTAGGGCTCAAACCGCTAATGACAAAAGATTTTCTAAGGTTCAATGGCTGGATGTAACCTCAG  
 GCTGACTGGGGTGTAGGAAAAGAAAAGATCCGAAACTTATCTTGATAAATAA

>YOR046C 0.75 Cold

ATGAGTGATACAAAGAGAGATCCGGCCGATTTACTAGCTTCTTTAAAGATTGATAATGAGAA  
 AGAGGATACAAGTGAAGTTTCAACAAAAGAGACTGTAAAGTCCCAACCAGAAAAGACTGCTG  
 ATTCGATCAAGCCTGCAGAAAAATTAGTTCCAAAAGTTGAGGAAAAAAAACAAAACAGGAG  
 GATAGTAATTTAATCAGCTCAGAATATGAAGTTAAGGTCAAACCTTGCTGATATCCAGGCTGA  
 CCCAAATTCTCCATTGTACAGTGCTAAATCTTTTGATGAATTAGGATTAGCACCAGAACTAC  
 TAAAGGGGATATATGCTATGAAATTTCAAAAACCATCCAAAATTCAAGAAAGGGCGCTGCCA  
 TTATTATTACATAATCCGCCTAGGAACATGATTGCTCAGTCTCAATCAGGTACAGGTAAAAC  
 TGCCGCCTTTTCTTTAACGATGCTAACAAAGAGTAAACCCAGAAGACGCATCTCCACAGGCAA  
 TTTGCTTAGCCCCCTCCAGAGAACTGGCCAGACAAACACTAGAAGTCGTTCCAGGAAATGGGT  
 AAGTTCACAAAAATAACCAGTCAGTTAATTGTTCCCGATTCTTTTGAGAAAAACAAGCAAAT  
 TAATGCTCAAGTGATTGTTGGTACGCCGGGCACTGTTCTTGACCTAATGCGTAGAAAAATTGA  
 TGCAGCTACAGAAAATTAATAATTTTTGTTTTGGATGAAGCCGATAACATGTTGGATCAGCAG  
 GGTCTAGGTGACCAGTGTATTCGTGTTAAGAGATTTTTTACCCAAGGATACTCAACTTGTTTT  
 GTTTAGTGCTACTTTTGCCGATGCAGTTAGGCAGTACGCAAAGAAGATCGTTCCAAATGCTA  
 ATACTTTTGAATTACAAACAAATGAAGTTAATGTTGATGCCATCAAACAACATATACATGGAC  
 TGCAAAAACGAAGCAGATAAGTTTGATGTTTTAACTGAGCTATATGGTTAATGACAATTGG  
 ATCTTCCATTATTTTTGTTGCAACCAAAAAACCGCAAACGTTTTTATATGGGAAATTGAAAA  
 GTGAAGGTCATGAAGTTTCTATCTTGCATGGTGATTTACAGACACAAGAAAGAGACAGATTA  
 ATAGACGACTTCAGAGAGGGTAGATCCAAAGTTTTTGATTACTACTAATGTCCTGGCCCGTGG  
 TATTGATATTCCACTGTCTCAATGGTTGTCAACTATGATCTTCCAACGCTTGCTAACGGAC  
 AAGCAGATCCAGCTACTTACATTACAGAATCGGTAGAACCGGTAGATTCGGCAGAAAAGGT  
 GTTGCCATTTCTTTGTACATGACAAAATTTCTTTCAATATTTTTATCTGCAATTCAGAAATA  
 CTTGCGTGATATAGAAATGACTCGTGTTCCAACGGATGATTGGGATGAAGTCGAAAAAATAG  
 TTAAGAAAGTGTTAAAGGATTAG

>YBR258C 0.82 Cold

ATGGCGTATAATCAAGAAGATAGTAAAGACTATCAGACAAGTATAAGAAGGAGGGACATTT  
 TGACAAGTTGAAAAGAGAAATATTGTCTAACCCATGGAATAATACAGAAGAGAATAGTGAAT  
 CTTTGAACAAGCGCTTCGGAAAAGAGTTGCCAGTACTGTAAAGAAATGGTTAACGAAGAT  
 GAAGAATTAATATTTAAAAACAGAGGGCTAACAGTGCATTGATTGAATCACAATTGGTCAA  
 GGACAACCTAACGCTGGGTAGTAAAATGGAGGGGGATAATGGTGATGGTGAGAAGAAAT  
 TTGACTTGGATGTCTATGTACGGTCTAAGTTACAGGATCCCAAACCTATTGGAAATGATAAAG  
 GGACAACCTCAGGAAACACTGAACTCTTATGAAGAGGAAGCAAATGGAAGTACGTAA

>YPR155C 0.8 Cold

ATGATCATCAATAGGCGTATTTTGAATCTTTTGAAGAGATAAGTCATTCATTAGAGGAATC  
 ACTACGAGAGGTTGCATTTGATTCACAGCAACAATTGATTCAAGACGTACGTGAGGAAAATG  
 AAGAACTAAGTAGGTTACAAGATCAATTACAATTGATCAGGTCATTTGTTGAAAAAATCTGC  
 ATTTCAATCAAACTGACAATATTGACTCTTATTGTTCCGGTGCCTTTTGATTTGCTATACAA  
 TATTTGCAAGGACATTGCTGATCCCTCATCTTTGAAGACGGAGATTTGCAATATCTTGTTA  
 GCCAAGCCATATTTGAGTACATTATATTATTGTGCTACTATTCTGTGACCAACGAATGCGTC  
 CAAGGTTTACCTGCCGTGTATGAAGCTGAACAGTACTACAAAACAGTAAGTGATTCAATCCT  
 AAAGTCTTTTCTTTACTGTTTACAAAATTCAGTATCGACAATACGTCTTTTATCTCAAACCTG  
 TTTTGAAGGATGTAATAAGAAAAAAGTGTGCGATCAAAAATGGTCCCTAAAGGCCTTGTC

GTTGATTTACTAGAAAAAATACGCCCAAGAATAAACAAATTTATGGTGATTCGGAACCTCAG  
 GTTTGTCTGGGCTACCGAAGAAACCAATTGAAATAGCTTCATTGGTTTCTGATATACCTCGCG  
 GTATAGTGCACGAAAGACTTGATATGGTCACTCAATCATCAAAGTATTATACTATTAACCTG  
 GGGCAGTTGATCACTGAATTCGATCAACAACCAGAAGAAAATGGTATGTTACCGAAGTACA  
 TTTACCGAACTACGAAAGACGCTAAAATCTTTACAGGACTTCTTTGGATTAGCCATGTCTG  
 ATTCGAATTTACTAGATGTGATCCGATGCTCAGCGAAATTCATAAAGATCATCCTTTAAGA  
 AGGTTCACTAAACCAAGTATATTGACTAGATACTGGCCTTCAATTTTGTGTGTCTTTTATA  
 TGGACCATCTTCTGTTATGTGCTTGTGGAATTCCTGGTATTTTATTCAAGATTTTCAATTAAGA  
 CCAATGTCGTTGACTTTGCGAAAGGGCTGATCTTGAACCTGGTTATGGGCACCCCTGAAACAG  
 GTTTGGTCTACTGTTAAGCATGACGAGGGAAGCGCCATTTTCAGTGACATCACAGGAGACATT  
 AAACCTCTGACATGGATTCTCTTACCAGAATGATTGTTAGTTTTGTTGTGGATAATAGTGATT  
 CGACGTCTAACAGCCCATAGACCCTATTCTATTGAGTACTAAAGTCGAACATGGTGATTTG  
 ACCGAATTTATGGAAATATATGAAACACAACCTACATCATCCGATAAAGAATATAGCTACGGG  
 TGGATTAGTCAGGTCTTTATTGATTCAACTGCAAAAAACAAAAGTCGATGGATCTATGGCAT  
 TGAATGGCATTGATAAAATGCTGAAATCGCAACAGTTGGTGTTTGGAGTTGTAGCATTATCT  
 CCGGCTTTAGTGATACTATATTTCTTCTATAGTGGCGTTAAAAAGATTTGTCAAACCTAGGCAA  
 TGTCTGGTCTAATGAAAAACGGTATAGGGAGCAAATAAGTATAAGTTTGAATAATGTGGAAA  
 GAGTTTTGAATTTCTAAACAAGGTGCGGACGCCGATGAGGAACACTTAAACCAGGGTCTA  
 CTAGTGATTGAGGTTTCTAACTTATACAAAATGGGAAGTTTTTTTGATCCCGCGTTCAAGAAA  
 GAAAGAATGGTTTAGGGACGTTGAGGAACTGGTGGATAACCAATCTTACTCCGGAGCTCATA  
 TAAATGTCGTCAACAGGATATACCACGTATATGGCAGGTTTTTAATCCATTAG

>YKL145W 0.69 Cold

ATGCCACCAAAAAGAAGACTGGGAAAAATACAAGGCACCTTTGGAAGACGATGATAAAAAACC  
 TGATGATGACAAGATCGTACCCTTAACAGAAGGTGACATTCAGTCTTAAAATCATAACGGTG  
 CAGCTCCATACGCAGCCAAATTAAGCAAACTGAGAATGACTTAAAAGACATTGAAGCGAGA  
 ATCAAAGAAAAGGCCGGTGTGAAAGAAAGCGATACAGGGTTAGCACCCCTCCATCTATGGGA  
 TATTATGGGTGATAGGCAGAGACTGGGCGAAGAACATCCCTTACAAGTCGCTCGTTGCACGA  
 AGATCATTAAGGGGAATGGTGAAGTGACGAAACTACGACAGATAATAATAACAGCGGCAAT  
 AGCAATAGTAATAGCAATCAACAGTCTACTGATGCAGACGAAGACGATGAAGATGCCAAGTA  
 CGTGATAAATCTTAAGCAAATGCCAAATTTGTCGTCGGATTAGGTGAACGTGTTTCTCCAA  
 CAGATATAGAAGAAGGTATGCGTGTAGGTGTCGATAGGTCGAAATATAATATTGAACTTCCA  
 TTGCCCTCAAGGATTGACCCATCAGTTACTATGATGACCGTTGAAGAAAAGCCTGACGTTAC  
 TTATAGCGATGTCGGTGGCTGTAAAGACCAAATGAAAAGCTGAGAGAAGTTGTCGAGCTGC  
 CCTTATTATCTCCAGAAAGATTTGCTACTCTTGGTATTGATCCACCAAAGGGTATCTTATTA  
 TATGGGCCACCTGGTACTGGTAAGACATTATGTGCTCGTGTGTTGCTAATAGAAGTATGTC  
 AACTTTTTATTAGGGTCATTGGGTCTGAGCTAGTGCAAAAATATGTCGGTGAAGGTGCTCGTA  
 TGGTTAGAGAATTATTTGAAATGGCTCGTACCAAAGGCTTGCATTATATTCTTCGATGAA  
 ATCGACGCTGTTGGTGGTGCTCGTTTTTGATGATGGTGCTGGTGGTGATAATGAAGTTCAAAG  
 AACTATGTTAGAAGTATTACACAGTTAGACGGGTTTGACCCCTCGTGGTAACATTAAAGTGA  
 TGTTTGCCACCAATAGGCCCAACACTTTAGATCCAGCTTTATTGAGACCCGGTAGAATTGAT  
 CGTAAGGTAGAGTTTTTCAATTACCTGACTTGAAGGTGCTGCAAATATCTTCCGTATTCACTC  
 TAAATCAATGAGTGTGGAACGTGGCATCAGATGGGAACCTTATCTCCAGACTGTGTCCAACT  
 CTACCGGTGCAGAAATTAAGATCTGTTTGCACAGAAGCCGGTATGTTTGCATTAGAGCAAGA  
 AGAAAGGTGGCTACTGAAAAGGATTTCTGAAAGGCTGTTGATAAAGTTATTAGCGGATACAA  
 GAAGTTTAGTTCCACATCGCGTTATATGCAATATAATTGA

>YJL075C 0.81 Cold

ATGCTTGATTATTTTTTTTTACTAGCTTTCTGTGACGTGATTTCTACTGAGACTTTCTGGTA  
 TCATTTTTTCTTGAATCTTTTATTAATGATGCAAATCCACCCTTGGCTTCTTCTTCTTAC  
 CTAAGCAGCACTAGCGGATTTTCGCACTAATAAACTTTTTCCATCATCAGATGAATCCCT  
 GAGTCATCAGAATCTGACTCAGATTTAGAATCTGAACTGGAATCCGATACGGAGTCCGAACT  
 GGAGTTAGAGTCAGAATCAGAGCTAGATTCATCATCACTACTTGAAGGGGCTTTTGTGTGTG  
 ACTTCTCATTCGATTTAGAAGTTTTTCTTACATCTGGGATGCCTCTTGAACAAGATCA  
 GATAATGAACTCAAAGAAGGACGAACTTTTTCTTGGAAAGGTCATGA

>YJL004C 0.79 Cold

ATGGTTTCGATAAGAAGGTATTTGCGAGTGCCGAATGAGTTGAAACCTTCCCAGATCTTCAA  
 ACAAGATTCTCTCTCCAAGTAAGATTGGACTTCAAATGTTCTTTTACAGATTTTTTATT  
 ACACCACAGCGATCGTTCTTTTTTATTGTTGGGCGAAGCTAGCGGGATATGATCTCAATATC  
 AAGGAATGGCTGTTTTCTTGGGAGAATATCGACTTTACGAACGCATACGGTTTTATCAATCTC  
 ACTGTTATGGCTTCTGGATTCAATTAATATGTGTTTTTTTTCTTAACTGTTATCGTTGGACGGA  
 GTAACCTCGCATGGGATTTTGGCTATCACTATAACATGCCATCAATTTTATTGTGGTGTTCCTC  
 TATACTCGAAATTTCTTTCTTTTTCTTGGTTTTTTTTCTTCAAATTTTATCATCTTTAATACT  
 AATATTTTTGGGGACATGGACAACAAGATGGAGAGAGCTTAGAGACACCTTTTTTTGAGGGCT  
 TGGTTGATCCTAATGAAGGAGAAGTTGGATTGGTTACGCCTAGTCAGCAGCATAGTAATCAT  
 TCAGAATTGGAGCAATCACCAATACAACAAAAGACTTAGAAAAGCCAAATATGA

>YDL029W 0.66 Cold

ATGGACCCACATAATCCAATTGTCCTTGATCAGGGTACTGGTTTTCGTCAAAAATTGGTCGTGC  
 TGGCGAGAATTTCCCAGATTACACGTTTTCTTCTATTGTTGGTAGACCCATCTTGAGGGCGG  
 AAGAACGTGCCAGCGTTGCTACACCATTAAGGACATTATGATTGGTGATGAGGCAAGTGAA  
 GTTCGCTCTTATCTGCAAAATATCTTATCCTATGGAAAACGGTATTATTAAGAATTGGACAGA  
 TATGGAACCTTTTGGGATTACGCCTTTTTTCGAGCAAATGAACTACCATCCACCTCCAACG  
 GTAAGATTTTACTAACGGAACCTCCAATGAATCCGCTGAAAAATAGGGAAAAAATGTGTGAG  
 GTAATGTTTCGAAAAATACGATTTTGGCGGAGTTTATGTTGCCATCCAAGCTGTTCTAGCATT  
 GTACGCACAAGGTTTGTCTTCAGGAGTCGTCGTCGATTCCGGTGACGGTGTACTCATATAG  
 TCCAGTTTACGAATCTGTCTGTTTTGAGCCACTTAACAAGAAGATTAGATGTTGCGGGTAGA  
 GACGTTACTAGGCATTTGATTGATCTGCTTTCTCGTCGTGTTATGCATTTAACAGAACTGC  
 AGATTTTCGAAACTGTGCGTCAGATAAAGGAAAAATTATGTTATGTTTCATATGATTTAGACC  
 TAGATACAAAATTTGGCTAGAGAAACAACCGCCCTTGTGGAATCGTATGAGTTACCAGATGGC  
 AGGACAATCAAAGTGGGACAAGAGAGATTTGAAGCACCAGAATGTTTGTTCACCTGGTTT  
 GGTGACGTTGAACAACCTGGCGTGGGCGAGCTGTTATTTAATACTGTGCAATCGGCTGATG  
 TTGATATCAGAAGTTCCTGTATAAGGCCATTGTTCTTTCAGGTGGTTCAAGTATGTACCCA  
 GGGCTGCCTTCGAGATTAGAGAAAGAATTGAAACAATTATGGTTTTAGTAGAGTTTTACACAA  
 TGACCCTTCAAGACTTGATAAAATTCAAAGTTAGAATTGAAGATCCTCCAAGGAGAAAAGCATA  
 TGGTTTTTATTGGTGGTGCCGTTTTAGCTAGTATCATGGCTGATAAAGACCACATGTGGTTG  
 TCTAAGCAAGAATGGCAAGAAAGCGGGCCATCTGCAATGACTAAATTTGGTCCAAGATAG

>YKL073W 0.78 Cold

ATGCGAAACGTTTTAAGGCTTTTATTTTTTAACAGCTTTTGTGCTATAGGGTCTTTAGCAGC  
 CGTTTTAGGTGTTGATTACGGTCAGCAAAATATCAAGGCCATTGTGGTTTCTCCGCAAGCCC  
 CATTAGAACTTGTGCTCACACCAGAGGCAAAACGGAAGGAGATATCTGGTCTTTTCGATAAAA  
 AGATTACCAGGTTATGGAAAGGATGATCCGAATGGGATTGAAAGAATCTACGGTTCCGCTGT  
 TGGCAGTTTAGCAACAAGGTTTCCCCAAAACACATTGTTGCATTTGAAACCGCTACTTGGGA  
 AATCACTAGAAGATGAAACCACTGTAACCTTGTATTCAAACAACACCCCCGTTTTAGAAATG  
 GTATCAACAAATAGAAGTACCATAGCCTTTTTAGTTGATAATGTGGAATATCCATTGGAAGA  
 GTTAGTGGCAATGAATGTCCAAGAGATTGCCAATAGAGCCAATTCCTGTTGAAGGATAGAG  
 ATGCAAGAAGTGAAGGACTTTGTAACAAGATGAGTTTTACAATTCCTGACTTTTTTTGACCAA  
 CATCAAAGGAAAGCACTTTTAGATGCCAGTTCATAAACCACAGGAATCGAAGAGACATATCT  
 GGTAGTGAAGGGATGTCTGTGTCAGTTAACTTTGTATTAAAGCAGCGCCAATTTCCACCAG  
 GTGAACAGCAGCATTATATCGTATATGACATGGGGAGCGGTTCTATTAAGGCCTCAATGTTT  
 TCTATATTGCAGCCGGAGGACACTACTCAGCCGTTACAATAGAATTTGAAGGATATGGGTA  
 TAATCCACATCTAGGTGGTGCAAAGTTTACAATGGATATTGGCAGTTTGATAGAGAATAAGT  
 TTTTGGAAACACACCCAGCCATAAGAACTGATGAATTGCACGCTAATCCCAAGGCCTTAGCA  
 AAAATCAACCAAGCAGCAGAGAAGGCAAAGTTAATTTAAGCGCCAATTCGAGGCAAGTAT  
 TAACATAGAATCACTGATCAACGATATTGATTTCCGTACTTCTATAACTAGACAGGAATTCG  
 AAGAATTTATTGCAGACTCGTTATTGGACATTGTCAAACCCATAAATGACGCTGTTACAAAA  
 CAATTCGGTGGCTATGGAACAAATTTACCTGAGATAAATGGGGTCATTTTGGCGGGAGGCTC  
 TTCCCGAATTTCCATTGTGCAGGATCAATTAATCAAACCTCGTATCCGAAGAAAAAGTGTGA  
 GAAATGTCAATGCTGATGAATCAGCTGTGAATGGTGTGTTATGAGAGGGATCAAGTTATCT  
 AATTCGTTTTAAGACCAAGCCGTTAAATGTTGTTGACCGTTCGTAAATACTTATTCATTCAA  
 ATTATCAAACGAATCTGAACTGTATGATGTGTTACGCGCGGAAGTGCTTATCCAAACAAAA  
 CATCTATTTTGACAAACACGACTGATTTCGATTCCTAATAATTTTACCATTGACTTATTTGAG

AATGGTAAATTGTTTCGAAACTATCACAGTTAATTCAGGAGCTATAAAGAATTCATATTCCTC  
 TGATAAGTGCTCGTCAGGAGTTGCGTATAACATTACTTTTCGACTTGTCCAGTGATAGATTAT  
 TCTCTATTCAAGAGGTTAACTGCATTTGTCAGAGCGAAAATGACATAGGTAACCTCAAGCAA  
 ATTAAGAACAAAGGCAGCCGTTTGGCTTTTACTTCTGAGGATGTTGAGATCAAAGGCTTTC  
 TCCTTCAGAACGTTTCGCGTTTGCATGAGCATATCAAGTTGCTCGATAAACAGGATAAGGAAA  
 GATTTCAATTCCAAGAAAATTTAAACGTTCTTGAAAGTAACTTGTATGATGCTAGAAACCTG  
 CTAATGGATGATGAAGTTATGCAAAATGGACCAAATCCCAAGTAGAAGAGTTATCGGAGAT  
 GGTAAAGTATATTTGGATTGGCTCGAAGATGCATCCTTTGATACTGACCCTGAGGATATAG  
 TTAGCAGAATTAGAGAAATTGGAATATTAAGAAAGAAAATAGAACTTTACATGGATTCTGCA  
 AAGGAACCTTTGAACTCTCAACAATTTAAAGGAATGCTTGAAGAAGGCCATAAGTTACTTCA  
 GGCTATAGAAACCCATAAGAATACCGTTGAAGAATTTTTGAGTCAATTTGAAACCGAGTTTG  
 CGGATACCATAGATAATGTTAGAGAAGAATTTAAAGGATTAAGCAACCAGCGTATGTGTCG  
 AAGGCGTTATCTACATGGGAGGAAACCTTAACTCTTTTAAAGATTTCCATTAGCGAAATAGA  
 GAAGTTCTGGCAAAAACCTATTTGGCGAAGACCTTCGTGAACATTTATTTGAAATCAAAT  
 TACAATTTGATATGTATCGTACGAACTAGAGGAAAACTGCGTTTAATAAAAAGCGGTGAT  
 GAAAGTCGCTTAAATGAAATAAAGAAGTTACATTTAAGAACTTCCGCTACAAAAGAGAAA  
 GGAGGAAAAGTTGAAAAGAAAAGCTTGAACAGGAAAAAAGCAGAAACAACAATGAAACAGAAT  
 CGACAGTAATCAACTCGGCTGACGATAAACTACTATTGTCAATGACAAGACCACCGAGTCG  
 AATCCAAGTTCTGAGGAAGACATTTTGCATGATGAATTATAG

>YJL156C 0.81 Cold

ATGGTCAGATTTTTTGGTTTAAACAAGAAAAAGAACGAAGAAAAGGAAAAATACAGACTTGCC  
 TGCAGACAATGAACAAAACGCAGCAGAAACGTCGTCTAGCAACGTATCTGGAAATGAAGAAA  
 GAATAGACCCAAACAGTCATGATACGAACCCGTGAAAATGCAACAATGATGATGCGTCTACG  
 ACTTTTGGTTCGTCATACAATCGTCATCCATATTTTCTAGAGGAAGAATGACTTACGGAAC  
 GGGAGCCTCTTCTAGTATGGCCACATCAGAAATGCGTAGTCACAGTAGCGGACATAGTGGAT  
 CTAAGAATAGTAAAAATTTACAGGGTTTCAAAGATGTTGGGAAACCATTAAGAGCGGTGAGC  
 TTCTTGAGTCTGTTAAGGAGGAGGAATCTCAGGATACGCAGAATACTTTAGACGTCAGCTC  
 TTCAACGTCCTCAACATTAGCCACTTCAGAAAATGCGAGAGAAAACAGTTTCACTTCCAGAA  
 GAAGTATCACTTTGGAGTACATTCACAAAAGTTTGTCTGAGCTAGAGGAAAATTTGGTTGAT  
 ATAATGGATGATATTCATCAGGATGTCATCAGTATTTCAAAGCGGTTATTTGAAGCCATCGA  
 ATATTTTAAAGAATTTCTTACCGACAACACGAGACAGGATACCGTACAGGATAAGTTTAGAAA  
 AATCGTCTTCAATTACGAAAAATTAATAAAAATTTGATTACATTTTCTGGATAATTTATTGGTT  
 TCCGACGATTTTTCGAATTTCTAGGTGATACTGTTACGAAGATTTTACTTCTTCTGAAGAA  
 ACTAAACCTTATTACGGATGACGATTTGATATCAGAATCGGGCGTTTTACCATGCTTATCAG  
 TCTTTTGTATTGGCAGCCATTGCAACTTACCAAGTATGGATAAATTAGGCATGATTCTAGAT  
 GAGTTGACCAAAATGGATTCTTCAATAATCTCTGACCAGGAAGGTGCTTTTATAGCACCTAT  
 ACTTAGAGGTATAACCCCAAAGAGTTCAATCTTACAATAATGTTTGGCTTACCCAACTTGC  
 AACATGAACACTATGAAATGATAAAGGTTCTTTATTTCGTTGTTCCAGATGTACACATGTAT  
 TGTGTGAAAGATTACATTAAGAAAGCTGCATCAGCAGTAGGCAGTATTCCGTCTCATAACGC  
 AGCAACTATCGATACAATAGCCCCAACTAAATTTTCAGTTTCCCCCCATATGCAGTTTTCAG  
 AGAATCCACTTGAATTGCCAATTTCTATGTCTTTTACTCCACTGAGACAAGCGCTAAAATTACA  
 GGTACTTTAGGGGTTATCTATTCCTCAGACTGGTAGTGATAAAAAATTTTCTCAATTTGC  
 AAGCTGCTCATTGCCATTACTTGCGCCACGTTGTATTATCTGAGAAGCAAGATTATCCAA  
 ACGTCATGGTACCTTCTAATGTTTTACAGACTTCTTACAAGAAAGTTTTAACGAAAGAATCA  
 GATAGGTATCCTGATGGTTCGGTGGAGAAAACAGCATTTTGGAGGAAGTGCAAAGAATAGA  
 TCAAACTTGAACCTGGCAGAAATCAACAAAATTTGGTCAAGTAGTTTGGGGCGAGAGAGCAA  
 TCGTAGATCACAGATTATCAGATTTTGTATTATCAAAGTTAATTCATCATTCAAATGTCAG  
 AATACCCTAGGTAATGGCTTAAAATCATTCCAGATCCAACATTAAGATTTCAAATTTACA  
 TGTGAAACGAAAAATTTTAAAGCTTGAAGCTGGGATGAAAGTATTTAAATAGGGGCTTCTA  
 CGGGATACACTTCAGGCGAGTTAAATTTACAAAATTAGTTTATTGGGCCGACGGAAAGTTA  
 CAAAGTAGCGAGTTTGTGCTGTCATCTCAACTCCTTTATTTGCTAGTGGGGGATTTCAGG  
 CGCATGGATCTTGACCAAGTTAGAAGATCGTCTAGGTTTGGGGCTTGTGGTATGTTGCATT  
 CATACGATGGTGAACAGAGGCAGTTTGGTTTGTTCACACCTATAGGTGATATCCTGGAGAGA  
 CTACATGACTGTAACATA

>YDL093W 0.79 Cold

ATGAATAAAGAGCATTGCTGAAGGTGGATCCCATCCCCGATGTGACTATTAACGCGGCC  
 TTTGAGGTCTTTCTCATAACAAAACCCTGTGATAATTTGAGTTCATTACGAACAGTTACTT  
 CATCTAAGGAAAAGCTTCTAGTTGGCTGTTTGGCTGATATTTACTGCCATCGTAAGGCTACAC  
 AATATCTCCCTGCCAAATAGTGTGTTTTTGGTGAAAATGAAGTTGGTACATTTGTTCTCA  
 ATACGTGAACAACATATTCTTCACCGATGTTTCATCCTCCTTTAGTGGCAATGCTATATGCAA  
 CCGTGTCTCTGTTTTTGGTTATAAAGGGCTTTTCAATTATGGGAACATTGGTACTGAATAC  
 ACGGCAAACGTTCCATACGTGCGGATGAGGTTCTTTTCTGCTACTTTGGGCATCGTGTCCGT  
 TTTGGTATTATACTTAACGTTACGAGTTTCTGGCGTGAAAATTGCGGTAGCTGCCATTTGTG  
 CAGTATGTTTTGCAATTGAAAACCTTTTGTAAACGTTGTCTCGTTTACCCTTGATAGAGGGA  
 CCCTTTGTTTTTTTCATGGCATGTGCAGTTTATTTCTTTAGAAGATCGGAACCTTTATTTGCC  
 AAATTCATGTAAGCAAACAAGTCATTACTTGCTGCGAGCATTGCATTGGGATTTGCAGTTT  
 CTTCAAATGGGCTGGCCTCTTCACCATCGCATGGGCTGGTATTATTGTCCTTTGGAGAGTA  
 TGGTTCATGATTGGTGATTTGTCAAGACCCATTGGTCTTCTATCAAATATATGGCGTTCCA  
 GTTTACCTGTCTATTAGCTATTCTGCCTTCATCTATTTTCTCATTTTTCAGCGTGCATATTA  
 AGACATTAACGTGAATGGTATTAGTAGTAGCTTTTTTCCCGCTGAGTTTAGAAAACTTTA  
 AAATACAACAACGTTATTAAGAGACTGTGGCAGAAGTTGCAGTGGGTTCGCTGTTTCACT  
 GAATCATGTTGGAACGGCAGGTGGTACTTGCATTCTCATCTTCACAATTATCCGGCTGGTT  
 CCATGCAACAACAAGTTACTTTGTATCCTCACATCGACCAAATAACAATGGATTATTGAG  
 CTGGCTGAACATCCAAATGAAAATGTCAACAAGTTTCCAAAATTTAACCGACGGTACCATAAT  
 TAAATTAAGACAGCTTAAGAACGGCTGCAGGTTACACTCACATGACCACAAACCTCCAGTTT  
 CTCAAAATGCGGATTGGCAAAAAGAGGTGTATGTTATGGATACGAGGGCTTCGAAGGTGAT  
 ATAAATGATGATTGGATAAATTGAAATCGATAAAAAGAGATCAGAGCCGGGACCTGCCAGGA  
 ACATATTAGGGCTATTGAAACCAAATTTAGGCTGAAGCATTATCTAACTGGTTGTTACTTAT  
 TTTTACATCCTGAAAAGCTACCTGAGTGGGGATTCCGGCAGCAGGAAGTTACGTGTGCATAC  
 TTTGCAAGGGAAGACTTAACTTCATGGTATATTAAGAAAACGAAAACGAAATTTCTTTGCC  
 AAATCCAGAGAAGTTTTCTTATAAGAAAATGAGCTTTTGGCAGAAGTTGTTGCTATCCACA  
 AGTTCATGTTCTACCTTAACAATTATATGGATACTAGTCATGCCTACTCATCTGAACCAAAG  
 ACTTGGCCTCTTATGTTGCGTGGTATTGATTTTTGGAATGAAAATGGCAGAGAGGTGACTT  
 TTTAGGTAACGCTGTTTTGTGGTGGTCTGTACAGCATTATTTTGCACGTTTCATCATTGGAG  
 TGGCTGTTGAGCTTCTTGTGTTGAAATTAGGTGTGAATATTCTACGGGATAAGCACATCATA  
 AATTTCCACTATCAGGTCTTTCAGTACTTATTAGGCTTTGCCGCCACTATTTCCCTTACTT  
 CTTTGTGGGGCAAAGTTATTTTTGTACGATTATTTGCCGGCCTATTATTTTGGTATCCTAG  
 CATTTGGTCATGCTTTAGACCTGATTTCAACCTATATTTCTAACAAAAGAAACAATACTGGA  
 TATATAGTGGTGGCTATTTTTCATGGTTGTATGTTTCTATTTCTTCAGCGAGCATTCTCCACT  
 TATTTATGCTACTGGATGGTTCGAGTAACCTGTGTAAGAGGTCCAAGTGGTTAGGAAGCTGGG  
 ACTTTTATTGCAATTCACTATTACTATCCGATAGCCACTATGAATTAACGCTGAATCATGA

>YOL151W 0.82 Cold

ATGTCAGTTTTTCGTTTCAGGTGCTAACGGGTTTCATTGCCCAACACATTGTGCGATCTCCTGTT  
 GAAGGAAGACTATAAGGTCATCGGTTCTGCCAGAAGTCAAGAAAAGGCCGAGAATTTAACGG  
 AGGCCTTTGGTAACAACCCAAAATTTCTCCATGGAAGTTGTCCAGACATATCTAAGCTGGAC  
 GCATTTGACCATGTTTTCCAAAAGCACGGCAAGGATATCAAGATAGTTCTACATACGGCCTC  
 TCCATTCTGCTTTGATATCACTGACAGTGAACGCGATTTATTAATTCCTGCTGTGAACGGTG  
 TTAAGGGAATTTCTCCACTCAATTA AAAAATACGCCGCTGATTTCTGTAGAACGTTAGTTCTC  
 ACCTCTTCTTATGCAGCTGTGTTTCGATATGGCAAAAAGAAAACGATAAGTCTTTAACATTTAA  
 CGAAGAATCCTGGAACCCAGCTACCTGGGAGAGTTGCCAAAGTGACCCAGTTAACGCCTACT  
 GTGGTTCTAAGAAGTTTGTGAAAAGCAGCTTGGGAATTTCTAGAGGAGAATAGAGACTCT  
 GTAAAATTCGAATTAACCTGCCGTTAACCCAGTTTACGTTTTTGGTCCGCAAATGTTTGACAA  
 AGATGTGAAAAAACACTTGAACACATCTTGCGAACCTCGTCAACAGCTTGATGCATTTATCAC  
 CAGAGGACAAGATACCGGAACCTTTGGTGGATACATTGATGTTTCGTGATGTTGCAAAGGCT  
 CATTTAGTTGCCCTTCCAAAAGAGGGAAACAATTTGGTCAAAGACTAATCGTATCGGAGGCCAG  
 ATTTACTATGCAGGATGTTCTCGATATCCTTAACGAAGACTTCCCTGTCTAAAAGGCAATA  
 TTCCAGTGGGGAAACCAGGTTCTGGTGTACCCATAACACCCTTGGTGTACTCTTGATAAT  
 AAAAAGAGTAAGAAATTTGTTAGGTTTCAAGTTCAGGAACCTGAAAGAGACCATTGACGACAC  
 TGCCCTCCCAAATTTTAAAATTTGAGGGCAGAATATAA

>YNL235C 0.71 Cold

ATGCGTACCCTTGGTATTCTAGAAGAAAGAAATTCAGACACTGTCACTCTCATTCTTTTT  
 ATTAAGTCGAGAAGTGAAATGTTTAAAACAATTCATACAAAACATATGCTATAGTACTAATA  
 ATCAGCCGTCCATCTCAAAAAGCATACTGAACATATGCACAGTCTTGTATACATGGTTGGC  
 CATCTTTTGGTTGGATGCTAGTGGGTACAATTGTCTTATCACTCGATATTATATTTCTGC  
 TCTTGTGACGGAACCGCACCTACTGCATCTCTTAAGTTTCCATCGGATATTTCTGATACAC  
 TCAGTTTGTACAGGTTACATCGTCGTACAGTAATTTGCTAAAAGATTTGGAGGTTCTATTT  
 TTTATGGGTAGTTTATCTGTATCAATAATTAATCCCTCTTCTAATGGTTGCAATAAATGA

>YAL001C 0.78 Cold

ATGGTACTGACGATTTATCCTGACGAACTCGTACAAATAGTGTCTGATAAAAATTGCTTCAAA  
 TAAGGGAAAAATCACTTTGAATCAGCTGTGGGATATATCTGGTAAATATTTTGATTTGTCTG  
 AAAAAAAGTTAAACAGTTCGTGCTTTCATGCGTGATATTGAAAAAGGACATTGAGGTGTAT  
 TGTGATGGTGCTATAACAATAAAAATGTGACTGATATTATAGGCGACGTAATCATTTCATA  
 CTCGGTTGGGATTACTGAGGACAGCCTATGGACATTATTAACGGGATACACAAAAAAGGAGT  
 CAACTATTGGAAATTTCTGCATTTGAACTACTTCTCGAAGTTGCCAAATCAGGAGAAAAAGGG  
 ATCAATACTATGGATTTGGCGCAGGTAACCTGGGCAAGATCCTAGAAGTGTGACTGGACGTAT  
 CAAGAAAATAAACACCTGTTAACAAGTTCACAACCTGATTTATAAGGGACACGTCTGTAAGC  
 AATTGAAGCTAAAAAATTCAGCCATGACGGGGTGGATAGTAATCCCTATATTAATATTAGG  
 GATCATTTAGCAACAATAGTTGAGGTGGTAAAACGATCAAAAAATGGTATTCGCCAGATAAT  
 TGATTTAAAGCGTGAATTGAAATTTGACAAAAGAGAAAAGACTTTTCTAAAGCTTTTATTGCAG  
 CTATTGCATGGTTAGATGAAAAGGAGTACTTAAAGAAAAGTGCTTGTAGTATCACCCAAGAAT  
 CCTGCCATTAATAATCAGATGTGTAATAACGTGAAAGATATTCAGACTCTAAAGGCTCGCC  
 TTCATTTGAGTATGATAGCAATAGCGCGGATGAAGATTCTGTATCAGATAGCAAGGCAGCTT  
 TCGAAGATGAAGACTTAGTTCGAAGGTTTAGATAATTTCAATGCGACTGATTTATTACAAAAT  
 CAAGGCCTTGTATGGAAGAGAAAGAGGATGCTGTAAAGAATGAAGTCTTCTTAATCGATT  
 TTATCCACTTCAAAAATCAGACTTATGACATTCAGATAAAGTCTGGCCTTAAAGGAATTTCAA  
 CTATGGATGTTGTAATCGAATTACCGGAAAAGAATTTTCAGCGAGCTTTTACCAAATCAAGC  
 GAATATTTATTTAGAAAAGTGTGGATAAGCAAAAAGAAAATACAGGGGGGTATAGGCTTTTTCG  
 CATATACGATTTTGGGGAAAAGAAGAAGTTTTTTAGGCTGTTACAGCTCAGAACTTTCAA  
 AGTTAACAAATGCGGAAGACGAAATATCCGTTCCAAAAGGGTTTTGATGAGCTAGGCAAACT  
 CGTACCGATTTGAAAACCTCAACGAGGATAATTTCTGTCGCACTCAACAACACTGTTAGATT  
 TACAACGGACAGCGATGGACAGGATATATTTCTTCTGGCACGGTGAATTAATAATTCGCCAA  
 ACTCAAAAAAACTCCGAATAAAAACAAACGGAAGAGGCAGGTTAAAAACAGTACTAATGCT  
 TCTGTTGCAGGAAACATTTTGAATCCCAAAGGATTAAGCTAGAGCAGCATGTCAGCACTGC  
 ACAGGAGCCGAAATCTGCTGAAGATAGTCCAAGTTCAAACGGAGGCACTGTTGTCAAAGGCA  
 AGGTGGTTAACTTCGGCGGCTTTTCTGCCCGCTCTTTGCGTTCACTACAGAGACAGAGAGCC  
 ATTTTGAAAGTTATGAATACGATTTGGTGGGGTAGCATACTGAGAGAACAATTTTACGAAAG  
 CGTTTCTAAATATATGGGCTCCACAACGACATTAGATAAAAAGACTGTCCGTGGTGTATTTG  
 ATTTGATGGTAGAAAGCGAAAAATTAGGAGCCAGAACAGAGCCTGTATCAGGAAGAAAAAT  
 ATTTTTTTGCCCCTGTTGGAGAGGACGCTATCCAAAGGTACATCCTGAAAGAAAAAGATAG  
 TAAAAAAGCAACCTTTACTGATGTTATACATGATACGGAAATATACTTCTTTGACCAAACGG  
 AAAAAAATAGGTTTCACAGAGGAAAGAAATCAGTTGAAAGAATTCGTAAGTTTCAGAACC  
 CAAAAGAATGCTAAGATCAAAGCTTCAGATGACGCTATCTCTAAGAAGAGTACGTCCGGTCAA  
 CGTATCAGATGGAAAGATCAAAGGAGAGACAAAAAAGTGTCTGCTGGTAGGACAACGGTGG  
 TCGTGAAAATACTAAAGAAGACAAAACCTGTCTATCATGCAGGCACTAAAGATGGTGTTCAG  
 GCTTTAATCAGAGCTGTTGTAGTTACTAAAAGTATTAATAATGAAATAATGTGGGACAAAAT  
 AACAAAATTTTCCCTAATAATTTCTTTAGATAACCTAAAAAAGAAATGGACGGCACGGCGAG  
 TAAGAATGGGTATAGTGGTTGGAGGGCATATGTCGATAAGTGGAATAAATGCTCGTTCTA  
 GCCATTAAGAGTAAAAGATTTCACTGAGGGATGTTGAAGAACTAGATCTTATCAAATGCT  
 TGATATTTGGACCTCTTTTGTGATAAAGGAAATAAAAAGGCCGCTCTTTCTTTATAAGAACT  
 ACGAAGAGAATAGAAAAAATTTACTCTGGTACGTGATGACACACTTACACATTCTGGCAAC  
 GATCTGGCCATGCTTCTATGATTCAAAGAGAGATCTCTCTTTAAAAAATACTTACACTAG  
 AAAGATTTCCGCTTCTACTAAGGACTTATCGAAGAGTCAAAGCGACGATTTATATTCGCACAG  
 TGATCCGGTCCATATTAATAGAAAGTCTTCGACCACTAGAAATGAAATAGAGGCGTTGAAG  
 AACGTTGGAAACGAATCAATAGATAACGTATCATGGATATGGCTAAGGAAAAGCAAATTTA  
 TCTCCATGGCTCAAACTTGAATGTACTGATACTTTACCAGACATTTTGGAAAATAGAGGAA  
 ATTATAAAGATTTTGGTGTAGCTTTTTCAGTATAGATGTAAGGTTAATGAATTTATTGGAGGCC

GGAAACGCTATTGTTATCAATCAAGAGCCGTCGGATATATCCTCTTGGGTTTTAATTGATTT  
 GATTTCCGGAGAGCTATTGAATATGGATGTAATTCCAATGGTGAGAAATGTTCCGACCTTTAA  
 CGTATACTTCAAGGAGATTTGAAATACGAACATTAACCCCCCTCTGATTATATATGCCAAT  
 TCTCAGACAAAATGAAATACAGCAAGGAAGTCTGCTGTCAAAGTCCACTGGGCAAACCATT  
 TTCTCGTTTTATGGGTGAATGGATCTGGTTCCATTAGGCCAAACATATGGAAGCAGGTAGTTA  
 CTATGGTCGTTAACGAAATAATATTTTCATCCAGGGATAACATTGAGTAGATTGCAATCTAGG  
 TGTCGTGAAGTACTTTCGCTTCATGAAATATCAGAAATATGCAAATGGCTCCTAGAAAAGACA  
 AGTATTAATAACTACTGATTTTGATGGCTATTGGGTCAATCATAATTGGTATTCTATATATG  
 AATCTACATAA

>YDL118W 0.81 Cold

ATGTTTGAATCGTTTGTAAATGAAGGCACAGCATTCCCTCTTTGCCAAAGATGAGCGCAT  
 AAGGTTCAAACATGATAAATAAAGGCGCTGCCTATTGATGTTTCGTAATGCTGAAGGTAATG  
 TACCTCTCCATAGCTGTAGAGGGCTGTCTATCTCTTTCAAATTTTTCCATAATGTAGCTTTC  
 TTGCTTGGCTGGATTCTCGTCTTCAAAGGTTCAAAGGTTGCAACGCAACAGCAGATGTTAG  
 CCCACCGAAAAAGCCCCGATCAAATGCGATGAATTTCTTGGCTTAGTTGCTTGTCTCAGTCA  
 TGTATGCTGCTTCACAAATTGTGTACCTTCTAGTTGTTCCCGCTGTGCTATTTGCTTTTCTT  
 TTGGTATAA

>YPL211W 0.7 Cold

ATGAGACAGCTAACAGAAGAAGAGACCAAGGTTGTTTTCGAAAACTCGCCGGCTATATTGG  
 TAGAAATATTTCTTTTTTTAGTGGATAATAAAGAAGTTCCCTCATGTCTTCAGATTACAAAAGG  
 ATAGAGTATATTACGTACCCGATCATGTTGCAAAATTGGCTACTAGTGTAGCAAGACCTAAC  
 TTGATGTCTCTGGGTATTTGTTTAGGTAATTCACGAAAACTGGAAAAATTCAGGTTACATAT  
 TACTTCTTTGACAGTATTGGCTAAGCATGCCAAATATAAGATATGGATTAACCTAATGGGG  
 AGATGCCATTCTTATACGGTAATCATGTGTAAAGGCACATGTGGGTAAAATGTCTGATGAT  
 ATACCAGAACACGCCGGTGTATTGTGTTTGCAATGAATGATGTGCCATTAGGGTTCCGGTGT  
 CAGTGCGAAAAAGTACTTCTGAGTCAAGAAACATGCAACCCACTGGTATAGTTGCTTTCAGAC  
 AAGCAGATATTGGTGAGTATTTGAGAGATGAAGACACCTTGTTTACTTAG

>YGR002C 0.79 Cold

ATGTCATCATCAGACATCTTTGATGTACTAAACATTAAGCAAAAATCCAGAAGTCCAACATA  
 TGGCCAGGTATCAGTGCCTTCGTCCCTCGGCAGCCAACCGGCCAAGCCTCAAGTGACGGGCA  
 TGCAAAGAGAAGTATTTAACTGCTAGGAGAGAACCAACCCCCGTTGTTATTAAGTCTGGA  
 AATAACTTTAAAGAAAAAATGCTTTCGACGTCCAAGCCATCTCCTTGGTCATTTGTAGAGTT  
 CAAAGCTAATAACTCTGTGACTCTGCGTCATTGGGTCAAGGTTCCAAAGAATTAATAGGAG  
 ACACACCAAAAAGAAATCGCCATATTCTAAGTTCAATCAGCATTTATCTATTCCATCATTACC  
 AAGGAGGAGTACGAGGCTTTTATGAATGAAAACGAAGGAACCAAAAAAGCGTAGAAAGTGA  
 AAAAAACCATAACGAAAACCTTACTAATGAAAAGAAGGATGAAAGTAAAAATAGCTGGTCTT  
 TTGAAGAAATAGAATACCTGTTCAATCTCTGCAAAAAATACGATTTACGTTGGTTCCCTGATC  
 TTTGACAGATACAGTTATAATAATTCAAGAACACTTGAAGATCTCAAAGAAAAATTTTATTA  
 CACCTGTAGGAATTATTTTAAAGCAAGTGATCCTAGCAATCCGCTTTTATCTTCTTTGAATT  
 TTTACAGCTGAAAAGGAGATAGAGAGAAAAAAGTATTTACAGCGTCTTCTTCTCGTTCTGCA  
 GCAGAAATTGCTGAAGAAGAGGCACTCGTAGTAGAGTCCAAAAAATTTGAAATGGCTGCCAA  
 GAGAACACTTGCAGAAAGAGAATCATTACTCCGACTGTTGGACTCGCCACATTCAGATCAGA  
 CAATTACACAATACCTTACCTCTCAGGGAATGTCTCAGTTATATAACCGCGTCTTAGCAGAT  
 AAAACTAGAAAGCGGAAGCACGATTTGAACATCCCTGAAAAATCCTTGGATGAAGCAGCAACA  
 GCAGTTTGCCTAACATAGGCAACTTCAACAACGAATGTAAAAAAGTCAGAAGTCAAGGAAA  
 ATCTCTCCCCAAGAAAACCAAAAGACAAAGACAGGAAATGCAAACGGCGCTCAAAAGAAAG  
 TCAGAAAGCGCATATGCAGAACAAATTGCTGAAAGATTTCAATTCAGATGAAAGGAAGGCTTT  
 AGGTGTGATTACGCATGGTGAGAAGCTATCGCCGGGTGTATACTTAAGATCTACAAAAATAT  
 CGACCTTCAAACCTGCGCTGCAGAACAAAATCTCGCCATTCTTCAAGAATTATCGTTACCT  
 TCTCGCCCTGTGATGCCCTCATTTGATGTAATGGAAAGACAAGAGGAGCTTTTGAAAAAAAT  
 CAATACGCTTATCGATTTAAAAAACACGTTGACAAATACGAAGCTGGTATGTCAATCACCA  
 AGTGA

>YOR130C 0.65 Cold



ATGGAGGACAGTAAAAAGAAAGGATTAATAGAAGGCGCTATACTCGATATAATAAACGGTTC  
 CATTGCAGGCGCCTGTGGTAAGGTGATCGAGTTTCCTTTTCGATACTGTGAAAGTCAGGTTGC  
 AAACACAAGCATCCAACGTGTCCCAACAACATGGTCTTGTATAAAAATTTACTTACCAAAT  
 GAAGGAATAGCACGAGGGTTTTTTCAAGGCATTGCTTCACCTTTAGTTGGAGCATGTCTGGA  
 GAACGCGACATTATTTGTGTCTTATAACCAATGTTCTAAATTTTTAGAAAAACATACAAACG  
 TTTTCCCGTTGGGGCAAATCCTGATCTCTGGTGGAGTAGCGGGTTCATGTGCTAGTTTAGTT  
 TTGACACCCGTGGAGCTGGTGAAGTGTAAAGTTGCAGGTTGCGAACTTACAAGTTGCATCAGC  
 TAAAACGAAACATACAAAGGTGTTGCCTACAATAAAAGCAATTATAACTGAGAGAGGATTTGG  
 CAGGATTGTGGCAAGGGCAATCGGGCACTTTTATTTCGAGAAAGCTTCGGTGGTGTGGCTGG  
 TTTGCAACCTACGAAATAGTTAAGAAGTCGTTGAAAGATAGGCACTCCCTTGATGACCCAAA  
 AAGAGATGAAAGTAAGATATGGGAACACTTATTAGTTGGAGGGAGCGCTGGATTGGCATTCA  
 ACGCCAGTATTTTTCTGCGGATACTGTGAAATCAGTAATGCAAACCTGAACATATAAGCCTC  
 ACCAATGCGGTGAAGAAGATATTTGGCAAATTTGGACTAAAGGGTTTTTTATCGAGGACTGGG  
 TATAACCCTTTTTAGGGCAGTACCAGCAAACGCTGCAGTTTTTTTACATCTTTGAGACTCTTT  
 CTGCACTTTAA

>YLR195C 0.78 Cold

ATGTCAGAAGAGGATAAAGCGAAAAAATTAGAGAATTTATTGAAGTTATTACAGTTGAATAA  
 TGACGATACTTCAAATTTCACTCAAGAACAGAAAAAGCTATGAAAGACCACAAATTTCTGGA  
 GAACGCAACCGGTCAAAGATTTTCGATGAAAAGGTGGTGGAGAAGGCCCATTTGATAAGCCA  
 AAGACACCGGAAGATATATCTGACAAGCCACTACCTTTATTGTCTAGCTTCGAATGGTGTAG  
 TATTGATGTGGACAACAAAAACAGCTTGAAGATGTTTTCGTTCTACTAAATGAAAACTACG  
 TGGAAGACCGCGATGCAGGCTTCAGATTTAACTATAACCAAAGAATTTCTTCAATTGGGCTTTA  
 AAGAGTCCAGGTTGGAAGAAGGATTGGCATAATGGTGTTCGCGTTAAAGAAACACAGAAATTT  
 AGTTGCCTTTATCTCAGCCATACCAGTAACACTTGGTGTTAGAGGTAAACAAGTGCCTAGTG  
 TAGAAATCAATTTCTTGTGCGTTCACAAAACAGCTAAGATCGAAGAGATTAACACCTGTTCTA  
 ATTAAGAAATTTACGAGACGAGTGAACAAATGTGACATCTGGCATGCATTGTACACGGCAGG  
 TATTGTTTTTGCCAGCACCTGTGAGTACGTGTCGTTATACTCATCGTCCCTTGAATTGGAAGA  
 AACTTTATGAAGTAGATTTTACAGGGTTACCAGATGGGCACACAGAGGAGGATATGATTGCT  
 GAGAATGCGTTACCGGCCAAAACAAAGACAGCGGGATTGAGAAAATTAAGAAGGAAGATAT  
 TGACCAAGTTTTTGTGTTTCAAAAGATATCAATCCAGGTTCGAACTAATTCAAATTTTCA  
 CAAAAGAAGAATTCGAACATAATTTTATTGGTGAAGAATCGTTACCATTGGATAAACAAGTA  
 ATTTTCTCATATGTAGTCGAACAGCCCGATGAAAAAATTACAGACTTCTTCTCATTTTACTC  
 ATTGCCATTCACAATCCTAAATAACACAAAATATAAGGACCTAGGCATCGGGTACTTGTATT  
 ATTATGCCACCGATGCAGATTTCCAATTCAAAGACAGGTTTGTATCCAAAAGCTACTAAGGCT  
 TTGAAAACAAGATTGTGTGAATTGATTTATGACGCTTGTATTTTTGGCCAAAACGCTAATAT  
 GGATGTTTTTAAACGCGTTGACTTCGCAAGATAATACATTGTTCTTGGATGATTTGAAGTTG  
 GGCCCGGTGACGGGTTCTTGAACCTCTATTTATTTAATTATAGAGCAAAGCCGATTACCGGT  
 GGCTTGAATCCCGACAATAGTAACGACATTAAGGCGTAGCAATGTGCGTGTGTTATGTT  
 GTAG

>YDR238C 0.82 Cold

ATGACTTCACTTCTTCCACAGCCAGCGTACACGTTGGTTTTTCGATCCTTCTCCGAGTATGGA  
 GACTTACTCGAGTACCGATTTTCAGAAAGCTCTTGAAAAGGGATCTGATGAACAAAAAATG  
 ACACGATGAAATCAATTTTAGTTACAATGCTGGAAGGAAATCCAATGCCTGAATTGTTGATG  
 CACATAATAAGATTTGTGCATGCCCTTCAAAAATAAGGAATTAAGAAAGCTTTTGTACTTCTA  
 CTGGGAAATTTGTCCCAAACCTAGCTGAAGATGGAAAATTTGAGACATGAAATGATTCTTGTCT  
 GTAATGCCATTCAACACGATTTGCAACATCCTAATGAATATATTAGAGGTAACACATTAAGG  
 TTTTAAACGAAATTTGAGAGAGGCCGAACCTTAGAACAGATGGTTCCCTCTGTCTTAGCGTG  
 CTTGGAATACCGTCATGCATATGTTGTAAGTATGCAATCCTAGCAGTTTTCTCCATTTTCA  
 AGGTCAGCGAACATTTACTTCCCGATGCTAAAGAAATCATCAATTCGTTCATAGTAGCTGAA  
 ACTGATCCAATATGTAAGAAATGCATTTATTGGGTTAGCTGAATTAGATCGTGAAAATGC  
 CTTACTACTATTTAGAGAACAATATTGCTGATATAGAAAACCTAGACCTTTATTACAAGCTG  
 TCTTTGTTCAATTTATCAGACAAGATGCAAACAGGACCCCTGCTTTGAAAGCCCAATATATC  
 GAATATTGATGGAACCTGCTTTCGACCACGACTTCCGATGAAGTCATCTTCGAGACCGCATT  
 AGCCCTAACTGTGTTGTCTGCCAATCCAAATGTCTTGGTTCCTGCGGTTAACAAATTTGATTG  
 ACTTGGCCGTCAAGGTTTCTGATAATAACATTAAGTTAATTTGTTCTAGACCGTATTCAAGAC

ATCAATGCTAATAACGTAGGTGCTTTGGAAGAGTTAACCCCTGGATATTTTGAGAGTCTTGAA  
TGCAGAAGATTTAGACGTTTCGTTCAAAGGCGCTTGATATTTCAATGGACTTGGCCACATCCA  
GAAATGCTGAAGATGTTGTTTCAGCTTTTGAAGAAAGAGCTGCAAACAACCGTAAATAACCCA  
GATCAAGACAAGGCAATGCAGTACAGACAATGTTAATAAAAACTATTCGTACCGTGGCTGT  
AAACTTTGTAGAAATGGCAGCAAGTGTGTTTCGCTATTATTAGATTTTCATCGGTGATTTAA  
ACTCGGTTGCCGCCAGTGGTATCATTGCCTTTATCAAAGAAGTGATCGAAAAATACCCACAA  
CTTAGAGCCAATATCCTTGAAAACATGGTTCAAACGCTAGACAAAAGTGAGATCTGCTAAAGC  
TTACCGCGGTGCATTATGGATTATGGGTGAGTATGCTGAAGGAGAAAGTGAGATACAACATT  
GTTGGAAGCACATTCGTAACAGCGTAGGTGAAGTTCCTATCCTTCAATCAGAAATCAAAAAG  
TTAACACAAAACCAAGAACACACCGAAGAAAATGAGGTTGACGCTACCGCCAAGCCAACCTGG  
TCCAGTTATTCTACCAGACGGTACGTATGCCACTGAAAGCGCTTTCGATGTGAAGACTTCTC  
AAAAGTCAGTTACCGATGAAGAACGTGATTCTAGACCTCCAATTCGCCGGTTTGTTTTAAAGT  
GGTGATTTCTACACAGCTGCCATTCTGGCCAACACCATCATTAAACTTGTTTTAAATTCGA  
AAACGTTTCCAAGAACAAAACCTGTCATCAATGCTCTAAAGGCGGAAGCTTACTAATTTTAG  
TTAGTATTGTAAGAGTGGGTCAAAGCTCTTTGGTGGAGAAAAAATTGATGAAGATTCTTTA  
GAGAGAGTTATGACATCTATTTCTATTTTATTGGATGAAGTAAATCCTGAGGAAAAGAAGGA  
AGAAGTTAAACTTCTGGAGGTTGCATTCTGGACACCACCAAATCCTCATTCAGAGACAAA  
TTGAAATTGCAAAGAAGAACAAGCATAAGAGAGCATTAAGAGACAGTTGCAAAAACATCGAA  
CCAATTGATACGCCGATTTCTTTTCAGGCAATTTGCTGGTGTGGATTCTACTAATGTGCAAAA  
AGATAGTATTGAAGAAGATTTACAACCTGGCAATGAAAGGAGATGCAATCCACGCTACTAGCA  
GCTCTAGTATTTGCAAGCTGAAGAAGATAGTACCTTTATGTGGCTTTTCTGATCCAGTTTAC  
GCCGAGGCTTGTATTACAAAACATCAATTTGACGTCGTATTAGATGTTCTTCTTGTAAATCA  
AACGAAAGAAAACATTGAAAAACCTACATGTGCAATTTGCAACTCTTGGTGATTTGAAGATTA  
TTGACACACCACAGAAGACCAACGTGATTCTTCATGGCTTCCACAAATTCACTGTTACTGTG  
AAAAGTTTCTCTGCTGACACAGGTGTCATTTTCGGTAATATTATTTATGATGGTGCGCATGG  
TGAAGATGCTCGTTATGTTATTTTAAACGACGTTTCATGTTGACATTATGGATTATATCAAAC  
CAGCCACTGCTGACGATGAACATTTCCGTACCATGTGGAATGCATTTGAGTGGGAGAACAAA  
ATATCGGTCAAATCACAACCTACCAACATTGCATGCTTATTTGAGAGAAGTGGTCAAGGGAAC  
TAATATGGGTATTCTAACACCATCAGAGTCGTTGGGAGAAGATGATTGTAGGTTCTTAAAGTT  
GTAATCTGTATGCGAAGTCGTCCTTTGGTGAAGATGCCCTAGCCAACCTGTGTATCGAAAAG  
GATTCAAAACCAATGATGTCATAGGTTATGTTTCGTATCCGATCAAAGGGACAAGGTTTGGC  
TCTGTCCCTAGGTGACAGAGTGGCATTGATTGCTAAGAAGACCAATAAACTTGCTCTCACTC  
ATGTTTGA

>YDL223C 0.73 Cold

ATGAATATGAACGAGTCCATTTCCAAAGATGGTCAAGGCGAAGAAGAACAATAATTTTTTC  
GTTTGGTGGTAAGCCCGGTTCCATGATTCCAATTCAGATTCTGCTCAACGCAAAAAGTCTT  
TCAGTACTACAAAGCCGACCGAATATAACTTACAAAAGAAGACCCGAATCAACGTCCAAG  
AATTTGGAACCAAGGCTAAAAACATTCTGTTACCTTGGAGGAAGAAGCATAATAAAGACTC  
GGAAACTCCACACGAAGACACTGAGGCGGACGCTAACCGCCGTGCCAACGTAACCTCTGATG  
TGAACCCTGTTTCTGCCGACACCAAGTCAAGTTCCTGGCCCTAATGCTACTATTACTACCCAT  
GGATACTCTTATGTCAAAAACAACGACACCCGCTGCTACAAGTGAGCAATCCAAAGTGAAAAC  
GTCACCTCCACTAGCCATGAACATTCAAATATAAAGGCGTCCCCACTGCGCATAGACATT  
CCAAAGGTGATGCAGGGCATCCAAGTATTGCAACCCTCATAACCACAGCACTTCCAAAGCT  
GCCACTTCTCCTGTTACTCACACGCATGGTCATTCCAGTGCTACCACTTCCCCTGTCACTCA  
CACACATGGTCATGCCAGTGTGAAAACCACATCTCCTACCAATACTCATGAGCATTCTAAAG  
CGAATACTGGTCCATCAGCCACTGCAACTACACATGGACATATCAACGTCAAACTACCCAC  
CCTGTTAGCCATGGTCACTCTGGTTCAAGCACTGGTCTTAAATCCACCGCTGCTGCACAGGA  
TCATTCAGTACTAAAACCTAACCTTTCAGTACTCATGGACATACAAGTGTAAAGATAACT  
CCTCAGCTACGAAGGTTATTTCGAACACTGATTCCAACTCAGATCGAGATGTCATACCTGGT  
AGTTTCCGGGGCATGACTGGTACTGATGTGAACCCTGTTGATCCTAGTGTTTACACAAGTAC  
AGGCCAAAGAGTAATGTTAGTTCGGGTATGAACGCTGTGACCCCTAGTGTCTACACGGACA  
CAAGTTCGAAGTCTGCAGATCGTAGAAAGTACTCTGGCAACACTGCGACTGGTCTCTCTCAA  
GATACAATTAAGAAATTGCACAGAACGTGAAGATGGATGAGAGCGAACAACTGGATTGAA  
AAATGACCAAGTTTCTGGTTCTGATGCAATCCAACAGCAAACTATGGAACCTGAACCCAAAG  
CAGCAGTCGGGACAAGTGGTTTGTAAAGCCAGCAACCTTCTTATCATGATAGCAATAAAAAAC  
ATTC AACACCCAGAAAAGAATAAGGTTGATAATAAAAAATATATCAGAAAAGAGCGGCTGAAAA

ATTTAACATTGAAAGAGATGACATTCTGGAATCCGCCGATGATTATCAACAGAAAAACATTA  
 AATCCAAGACGGATTCTAATTGGGGTCCAATTGAATATAGTTCCAGCGCTGGTAAAAATAAG  
 AATCTGCAGGATGTTGTTATACCTTCTAGTATGAAGGAGAAATTCGACAGCGGTACATCTGG  
 ATCTCAGAATATGCCTAAAGCGGGAACCGAATTAGGACATATGAAGTATAATGATAATGGTA  
 GGGATAACTTGC AATATGTTGCCGGTTCACAAGCTGGTCTCAAATAACGAACAACAATATT  
 GACATGTCACCCGTCATGAAGCAGAATGGTCCGGGCTTCTAATGATGCCACCACCCGAAA  
 CAATGTTGTATCACCTGCTATGAAGGACGAAGATATGAATGAAGATTCTACTAAACCTCATC  
 AATATGGGTTGGATTATTTGGATGATGTTGAAGACTACCACGAGAATGATATTGACGACTAC  
 TCAAATGCAAAGAAAAACGACTTGTATTCTAAGAAAGCGTACCAGGGAAAACCATCGGATTA  
 CAATTATGAGCAGAGAGAGAAAAATCCCAGGTACTTTTGAACCTGATACGTTGTCAAAATCAG  
 TGCAAAAACAAGATGAAGACCCGTTGTCTCCAAGGCAAACCCTAACCCTGCTGGTATGGAG  
 ACTGCAAGAGATGAGAGTCTTGGCAATTACGAATACTCGAATACTTCTGGTAACAAAAAATT  
 ATCTGATTTAAGCAAAAATAAATCAGGCCAACTCCAACGCGTTCTAATTTTATTGACCAA  
 TTGAGCCAAGAAGAGCAAAAACAACACAGGATATTGCATCCGATGCCAAGGATTTACCAAT  
 AATCCGAAACAGGTACTACTGGAAACGTAGATACAACCAGGAAAGGATGGGTGCAAAATCCAA  
 GACCTTCAGCTCGAACCTTTTGGATGATAGTAAAAATACAGACACTCATCTCGAAAACGCTA  
 ATGTTGCTGCCTTTGATAAATTCAGATCTGGAGACACTACATACTCCAAATCAGGGGATGCT  
 GAAACAGCTGCTTACGATAATATTA AAAATGCGGACCCTACATATGCCAAATCACAAGATAT  
 TACTGGAATGACTCACGATCAGGAACCATCATCAGAACA AAAAGGCCAGTTACGGTTCTGGCG  
 GCAATTTCCAAAATCAAGAATATTCTAGCGACGATAAATTTGATGTCAATAAGAATGCGAAA  
 GTTTTAGAGGAAGACGCACCCGGCTACAAGCGTGAAGTAGATTTGAAGAACAACGTAGAAC  
 CGACCTTGGTGGTGCCGACGCCTCAAACGCTTATGCTGCCGAAGTTGGTAATTTCCCTAGTT  
 TGATTGACCCACATGTCCCAACATACGGATTTAAAGACACCAACACCTCTAGTTCTCAAAG  
 CCATCTGAGGGCACCTACCCAGAAACCACTTCTTATTCAATTCATAATGAAACAACCTTCTCA  
 GGAAGGAAAGTGTCGGTGGGTTC AATGGGTTCGGAAAAATCAAACATCATCACAATCATC  
 ACCGTCACAGCAGACAGAATTTCTCAAAGGGTCTGACTACGACTATAATAATTCTACTCAT  
 TCAGCCGAGCACACTCCAAGACATCATCAGTACGGTTCCGATGAGGGTGAGCAAGATTACCA  
 TGACGACGAGCAAGGTGAGGAACAGGCTGGTAAACAAAGTTTCATGGGTAGAGTGAGAAAA  
 GTATTTCTGGCGGTACTTTTGGATTTAGGAGTGAAATTTAA

>YGR291C 0.82 Cold

ATGGAACTTTTTATACCTTGCCAGAGCGCCTCAAGAAAATGATGCTGCAAGAAGAATTGAG  
 GAAGGAAC TATTCATCTTACGTTGTTTGTATCATCCCACGATCCAAATCATGTTACCTACGT  
 TAGGTACGCTAGGAACTAAAAAAGAAAAGAAAAGTATGCGTTATCACTCTTCGAGCCAATT  
 CTTAATTGTGTGGGTCCGCGAAAATTTCCGATAA

>YDR141C 0.82 Cold

ATGTCCTTACCCTAAAGCCCTTACAATTGACTCAAATAATAACAACACTAGACTCCAAACA  
 GAAGAAGTTTTCGTGCTAATGTGCGAGCGAGCATTAGAAAGATTTGACTCTGTAACAGAATGGG  
 CGGACTATATTGCTAGTTTTGGGAACACTATTAAGGCGTTGCAAAGCTGGTCACTAAATTT  
 CAGAATGTAAGGTACTATGTTCTTCTCCATATCAAGTAAGTCGAAGATTGACATCCTCATT  
 ATCGCCGGCGTTACCAGCAGGTGTTTATCAGAAAACCTTAGAAGTATATACGTATATCTTTG  
 AACATATTGGCCTTGAAACTCTGGCTACAGAATGTAACATTTGGATCCCGGGAATTTACCT  
 TTGATGACTTATGCCTCTATGTCTGTTAGGTACATTTGATAGAGCTTTACGATAACTATAT  
 CCTTCTGTTGCCTCAAACAACGTTAAGACTGCTCATCAGACCTTTGATTTCTAGTTTATTGC  
 CAGGAATTGATGATGAAAGCAACGATTTTTTACCTTTAACTTTAAACTCATTGAGACTCTG  
 CAGGAGAACCTGGATGATGATTCCTTATTTTGGCAAACGTTGTTTCTAGTCATGACTGCAA  
 TAAAGGCAGAAGACTGGGCGGACTCACGTGGTTGACTAGAAAGTTTCCGTCGTTGAATGCTG  
 TACCTCATCTAGTAAATAAAAATAAAAATGGAAGCGGAAGAGAACCCAAGTGAACCTGAAACC  
 AACGATTTCTCATCTAGACAGGAAAAAAGAAAAGAAGAAGCTTTCAAGGTCTTATTGCCCTG  
 TGCCAAAGATTTAGTAACCCCTGAACCAGGTCTACTTATCCGATGCCTTGTCGGTTGTTTAG  
 AAGATGAAAATGATATTCTTATTA AAAAGGAGCGTTTTTGGACCTTTTATTACAGAGGTTGAGG  
 CTAGACTCTCCCGTTTTTGAATGTTCTTATTACTTCTGAGGATAAAAAGTTATTGATAATGAG  
 TTGTTGTAGAACTACTTTGAGCAAGGATATGTCTTTGAACAGAAGAATATGGAACCTGGCTTC  
 TCGGTTACTGCTGGGGGCATGCTAAACAATAACGGCGGGAACCTCATGGAATATACTACC  
 TCGGTTAAGTCAGCAAACGAGGAAAGTAATGTATATTTTACAAAATATGGATTAAGCGCCCT  
 TTTAGAAGTTTAAAGCGACCTTCTTTCAGAAGAAGAATCCGTGTTAACTGCATTCAGGATAA

GTATGGCAGTAATGGATAGATGGGAAATTGGCTCACTTGTAATTCCTGAATTGTTTCATCCCA  
 CTTCTCTATTCTCGGAAAAATTTAAACAAAACGAACAAATAATGAAAACGGCAGCTACTTT  
 CTTTGACAATACTGAAACAAATATTATATGGGGAAAGCTATTTCAAGAACTTGAAGACATCA  
 AAAACCTAAAAATTTTGGATTTCGTATTAACAAATTTTAATATTGGAAACGACGAAGAGATT  
 ATCGTACGCCACCTTCCTTTGATATTATTAACTTTACTGGCCCTTCCATCTAATGATAAAGA  
 TTTTCGACAATATTTATAAGCTCCAAAAATTTCTTTGTACAACAAATTGTAAACTATATCC  
 CCGAGAGAGCCCTTCTCCCTCTCAGTCACTCAAACTAAAGCACGATGATGAAGTAAGCTGC  
 GAAGAACTTTTGGCCAAAATACGTGGGTTTTATACCAATGTTTCTAATCCATCTAGCATTTT  
 AGAGAAAGAAAAATAGCTGAGCGTTTGCCACCCTTTACAACAGAAGATCTAACTTTTTTAA  
 TAGCAGACCTGATTCAGAAGAAGCTTCTTTCAAGTTTATGGGACTTGGAAAATATCAATGAA  
 AGCTCCAAATTATTTATAGCTATTTTCGAAAAGATACCTGAGTCTGAAGAACTTAAAGGACG  
 ATCTCACATAAGCTGGTCGGATAAAAAAATAACTCAGAGCATATTTGAGGCTATTCCCAGGC  
 TTTGTGAATCTAATAATGATGCAAAATCAGAAGAATCGTTGGAATTGTGGAATTTTTTGGT  
 AACTACTTATATTCACGCATGGAATTCATTGAATCGATGAAATTATTGAAAGTAGTCATGAT  
 GGCCGTATGGAAATCTTTAAAAGATCCACGCCATCAAATACTAGGTGTCAAGAACTTAAAGA  
 CTTTAAACAGATTTATTCCATCCAAATTTATTGAAAGTGCCTTAGTGTATACTTTTGTGGAA  
 GAGGAAGATATATCCGAGAGATTAAGCGTGTAGATCTGTTATGGACACAATTAGACTCAGA  
 TTCAAACTTGATTAGGCGCCCTCTTGAATTAATTTTGGGCGAACTTTTTGATGACCAGAATC  
 CTTTTTATTTAAACGTTTCAAAGTGGATTTTATCGATATTAACCTCGGGATCTGCTTCAAGA  
 TTATTTTACATTTTACTGATAATATTTTAAAGTTAATCGTCTCGAAAAGAAAGATTAGA  
 CGAAAGGGATGATCTTGATATGCTCACATATGAGTTCCAAATGCTTGTCTATGTTTTGAAAA  
 CAAACAATGGACGCACTAGGAAAGTTTTTCCACTGAGCTTACCTCAATAAAATCTTCGACC  
 ATATGGAAGAATGAAGACGTTTCCACATATAAAAGTTTGCTGTTGGTTACATTGATGAGATT  
 TCTAAATATAAAGAGCAATACACATGCGAAAAGTATCAGGAGTGCTCTGATTCTTTTGGATA  
 TCTTACTCGATGGAACCTGAGCAAAATTTCAAGGACATTGTCATATTTTTGCTGCAAAATGTCG  
 TCTAAATATATTGCAGAAGAAGGAATTGAGCCCGAGTTAATAGCAGTTTCTTGTAGATAT  
 TGTATCGAAGGTTCTCAGACTATCACACGATAATGGTATTAACCTAGACATTTTTTGTAGACA  
 ATGCTGCCCATTTAAAATATATCGATTTCTTGTACCAGCGTTTCAAATATGAAAAGCCCT  
 CTTATTGTAACGGCCTATGTGAAGCTTCTTCCGAAAGCATGTTTTATTTGAGAATTCAT  
 ATTTGCAATGATTTTACCATTGTCTGCATCTCTTGTACAGTGTGTTTCAGAGATTGTTTTGC  
 TAGAAAAGAGAGAAGGTGGTTATTACCAACCAATAGCTTTGCTTCTGGGTGGTCTGGAAGAG  
 CTATTAGAGATTTACATGGTTACCTTGTCCAGGAGGAAAGGGAAGGATACTTTTTCTGGGT  
 TAATCTAAAGGGTGATTTTATTCAATCCGTTGTTTTCAAACGTTTTTTTCGTCAGATTCTTCCA  
 ATGAAGAAAGTAAGATTGAGGGGAAAGAGACGTAATACTACAATCTTTCAGACAGGTGATT  
 TCATGCTGTTTAGATATCTGGTATTGGGCCATAACATTTTCGTGTAATCTAACGATGATTC  
 TAGCCTGGACGCCACTAATCATAACTCATAACAAGTTCAAATTTAGGTGCAAGAAACTGTTGG  
 AAACCTTATTTCTACTAGAACCCTTTGGAACCTCTGGAAAATTTGATCAGCATTAGATCAGAC  
 AATACTACAGTCACACTAGTACATGTGCTCGACGGCAATAAACCCGCCATTACAATACCACA  
 TTTATTGTATGGTGTAATTATCAGATACAACAGAACGGCATCTGTCAAGTTTTTCTAATCGTG  
 ACGGAAGTAGGTCAAGCACAACTAAATTAACATAAGGGGAGCCTTCCATGTTAAAAAGATTA  
 AGCGGGGAATCGATTATTGCATTTTTTGTAACTACGTGGATTCTGTAGAAAACCTCTGCAAT  
 GGAGGAGTTTTATGGGGATTTCTGCTATTTTTTCAGAGAAGTAGCAACCAATTATAACCTTT  
 ATCTGATGTTTCGTTGTCTATATTAAACTTGTGGCCCTTATTTCTGAAAAGTAAGTAAA  
 ACGCAGTTTGGAGAACAAAAACGAGTTAGGAGGGAGATATCTGATGTGTTTTCAAATACCT  
 ACCTAATGCATTTATAAACTTTACGAACCTATATCGTGGCCACCCTGATTCATTTAAAGATT  
 TAGAATTTGTAGTATGGCGTGTCAATATATCGTCAACGATCAAATTGGAGGAGACAAGTTT  
 AATACAACGTTAGCGACAATTGTAATCAATGCCTAACCCCTTATATCAAACCCAAAAGTGA  
 AAAACTATTCCAGGTTATGCTTTAGAATTGGCCGCGGTGATATCCATTTAGGTTCAAAG  
 TTTAAAGTTGGAGGCTTTTAAATGCGGAATTGTTCCAAAATGACAAAAAACTTTCCGGTAATT  
 GGCAGCGATCAAACCTGGGAAAAGATTATTTACGAATGGTCCATTTATCCAGAAAATAAGTC  
 AAAAATCTTGAACGATTTACTATTAGAAATGGCTCCAAGCGTTCAAGTGTGACTCCGACTT  
 TAATCACGTTTAACTTAGGAAGCGATTCTGAAGTCAAGTACAAGTGCCAAAACCTTTTGAAA  
 ATATCGTACTTGTGATGGTATCGCCAAATGACGCATATTTGTTGCACTTTTCTCTTTAAT  
 AAGTTGCATTTTCCACTATTTGGTGTCCAAAGATATCAAGCTCAAGGGAAGCTGCTGGATCT  
 TACTAAGGGTTTTACTTTTAAAGATTTTACAGATCCCATTTCAATGACTATTGGTCTATGATC  
 AGTTACTGTTTCAAACCTAATTTGCAAGAATTTTATGAATCACTTCAAATACAGTCAGAAGT  
 CGATCCACAAAACAATATTGCAAGTATGTAACCTTTGGATTTGCTACTCTTACTCAACATGG

AAGGCTTCACCTCTACGAATGAGTGGATCTTTGTTATTGATACAATAAAATTGCGTATATAAA  
 ACGAACTCATTTCGTCGCGCTGGTAGATGAAATCGCAGAATTCAAAGATTACGAAATAACCAA  
 AACTGATGATCTTGAATTACCGACAACCTTTAAAAGATGGTCTCCATTATTACGAGGCATTC  
 ACAAATCGAGAGACACACGCAACTAAGAAGCTTCTTCCAGAATTTGAGTTATCTACATTAT  
 GAGAAAGTTTACGGACTAGGGTCAGTTGATTTATATGGTTGTGGTGAAGATCTCAAAAAAGA  
 TATCTGTTCATGA

>YLR161W 0.78 Cold

ATGAAGTTCCAATATGCGTTGGCCAAGGAACAGCTAGGCAGCAACTCGCGCAGTGGCGTCAA  
 AAAACTAATAAGTAAACACCACTGGCTTCCGGAATACTATTTCTCTGATCTCTCATTTTCTG  
 TTGTACAGCAGTGGGACAGTAGAGCCATTGAAAAAACTACAATCATATCTTGTATGCGGCC  
 GCAAACCAAGAGATTTATCCTTTGAGACATTGTGAGACCCCTCCGTTGCAACCGTGCTCTCT  
 GTTTTCATCACTATATGCACGCTCTTTCCAAAAGCTCCTGCACCTTTGCACGTGGCGGAGCCAT  
 CGCCCGCTTCCATATGTACGGCTGCCACACCTAA

>YER163C 0.82 Cold

ATGACTAATGACAACAGTGGTATCTGGGTCTTAGGCTACGGATCTCTGATTTACAAGCCTCC  
 GTCTCATTACACGCATAGAATACCGGCAATAATTCACGGTTTTGCTCGTCGGTTCTGGCAA  
 GTTCCACTGATCATAGGGGTACACCTGCAAACCCAGGAAGAGTGGCCACACTAATCCCGTAT  
 GAGGATATTATAAGGCAAACCTGCCTTCTTGAAGAATGTGAATTTGTATAGTGAAAGTGCACC  
 TATCCAGGATCCCGACGACTTAGTACCATAGGGGTAGTGTATTATATAACCACCAGAACATG  
 CTCAAGAGGTTAGAGAGTATTTGAACGTAAGAGAACAAAACGGGTACACTCTACATGAGGTT  
 GAGGTGCATCTAGAACTAATCGGGAGCACGAGGCAGAATTGGGTGAAGCATTAGAACAGTT  
 GCCTCGGCACAACAAATCGGGTAAACGGGTACTACTTACTTCCGGTGTACATTGGTACAATAG  
 ATAATGAGGCCTTCGTCGGACCAGAGACCGTGGATGAAACTGCGAAAAGTAATTGCCGTGTCG  
 CATGGACCTAGTGGATCTAACTATGAATACCTTGCAAAAAGTGGAGCAAGCGTAGCGCAAAT  
 GCCCATCATGAAAGAGCGAGGGCGTATTACCGATCATTATCTGACTGCTCTATTGGAGACTG  
 TAAATAAATACAGGTGA

>YLR368W 0.78 Cold

ATGACAAAGAGGAGAAACCTCTTTATGGTTGGTTCTTCCCTTCACAATAGATCATTTACCTCC  
 AGAAATATGGCTTTGTATTTCTAAGCTGGTTCGGACGCTGACCTGCATAACTTGTGTTTAA  
 TTAACAGAAGATTGTATTTGACAATTACAAGTGATGAAATTTGGAAAAGAAGATGCTATGAC  
 CGATGGATAAATCGAGAAAGCTTAGATATTTTAACTGGTAATGATTACGATTCTATACCCGT  
 CTCTCAATGGTATTTCTTACTATTTAAGAAGAGCAAAATGGGAGAATAAAAATTTTTTGTCTAT  
 TATGGGGGTTAACTGAAGAAACAAATCCCCAACATTTTCAGAGAGAAATATTTGCATATCCTC  
 CAATTTAGACATTACAACTGGCTACATTTCTGCATAGGATTATAAAAACAAGGCTACATACC  
 TGATAAAAGACCACCTTGATTTAATCACGTATGCAAACCTATCTGTTGAAAAATGTGCGACATA  
 AGTACGTATTTCTTTATTTATCCCACAAATGCCGCTGAATTGAAAAATCTTAATAATATG  
 GCCTCAAGGGATGCTGAAATGATATATTTAAGATTATCTGCCATTGATACGTCTTTTGATGA  
 CTTACTAGATGCTAGAGAATTCATATTAATGGAATATGTTCCGATCTACTACAAAAGTATA  
 AAAAAATTGAAGAGTTTTTGAATTTACGACCGGTGACTAGGGTTTTCCAAGTTAATCTCAATC  
 AGTACTGACTATCTGGACTGCTTCACACAACCTCATGATTCAGTGGGTCAAACAAATGATAG  
 GGCCACAGGAAGGGAGCTACATAGAGAGGATTTTCATGTTACTAAGAGTATATTTCCCGAGAAG  
 GACGAGGTTATAAACTATCATTTCTAGCAATAATACAGGCTATCACTAAGAGATATAACGTT  
 GATTCATATCTTGCTCGAGATCATTGGTGGTGTCTGAACCAGACTTTCCAGATGGACGGGC  
 ATTTGTTACCGTGAATGAGGATTTCCAGCCATACATTTTGGATAAAGAGGACCTTTTGAGCG  
 TTTGGTTCGAACAACCTCCATAACGCAGAAAAATTTGAAAGTACAGTTTTACCAGCATTATTA  
 GAACCAATATCGATAACAACATCTTCTGACGGAGTTCTTTGAGAACTGCTGCGATGCAAGCC  
 CAGGCCATTTGAGGGATATCCAAACAGAGCACACGGATTACGCGATATGTTTCCATACGGAA  
 AAGTGAAGTTCCAGAGATGTGACGATGTATTTGCATTTATATACGATCTTTTTCGATGGC  
 ATGTTTGAATCTGGAATGACAAGTTTACGGGGCCAGATGTTGAGAGATTTACTGAACTACGT  
 TAACGCTAATAATTTTGGTGATTTGAATATCATCATTGGACAAAATGCTCTTAAGGAACCAA  
 ATGACTGCTGGTCCAACAAGAGGGATTACGTTCTTCTTGATGACAATAATAAGATTGGATAT  
 TTCTATACGGATATTGAAACTGAGGATACTTTATGTGCCTTAAACCAATATGAAGTGGACGG  
 CAAAGTTTTTATAACAACAATAGATATCTTGGGTGATATAAGAGTACGCCGGCTGAAGGAC  
 TAACGCCTTTTTCAGGGAGATAATGATAAGTTGTGGGAGAGCTTTTCTTCCGTTGTTCCACGA

ACTGACTGGGGACTTTTTTTTCAAAGGCTATGACAAAGAAAGGCGTAGAATGCAATTAACCC  
TTACATAGAGGAAAAGCTTTCCAATCTAGCGAATGATGAACAGCCTTTACATAATTTATAG

>YNL313C 0.82 Cold

ATGGAGACGTTATTGTCATGCAAAATTATTGCTGTCTGCAGAAGTAGAATCTCTGAAAAGTGG  
TTCTTTTCGACCAGACATATGTGAAAAAGGCTGAACATATCATCAGTGGTGAATCATACCAGC  
TAGTACAGCAATTTGTGGACAAATTTAAGGGAAAAATTAGTATTTTCGGGAGAAATATCCACA  
TCTAGTGTTATTGCTGCTCTAAATGACTTTCTTAAACGTTGAGGTTTTCAAATGGGCCAAGA  
AAATGAGATGCTATTTTTGGCTATTGCCCTCTTACAGACCTTTATTCAAATAACTACACCG  
GCCAGCAGCTAGGTTGAAAGCAATCTCAGGTTTGTGGCAAAACCTGGAATTGAAATAGGA  
GCAGTTAATACAGCCCTTTCCCGCTCATTAGCCATTATGGGCCAGCCTGCCTACGAATTTAT  
GGATGATCCATTGTATTTGGTTTTATCACTATTACTTTGAAAGGATAACCGGCCAAAAAA  
GCTTATTTGATGTTACCCCGGATCAAGAAATTCGCTACCTATTATCTCTGCTGAGTCTACT  
CCTGGATTATTAGCTGTAGCTTATTGGTGGTGGGCAAGAGCTCTTTTGACGCAATTTGTCACT  
GATTCAGAACCTTCTGGGTTCCAAGCTAGTGTTGCATCTGCAATATATCAGTCTGCTGACC  
TTGCATATGCGATAACTAAGGAATTACCGGAGAGTATTCACGAAGATTTCAAAGAGAACTT  
TGTGCAATGTACTATCTAGAGAATGTCAAATGTTTCATTGGCCATCAACACAGAACATTTGTG  
CCTGCCATCCTTGACCAGAGCGAAAAAGATAACAAATTTTGAATTTGTAATGACGGGTGCAC  
GCGCTACTAGAACTAAATATCAGCAAAAGGCTCATGCCGGTTTGATCATTCTTGCCAAATCC  
TTCACATTTCAAATTTTGGCTTTGAGAACGACATCTGCTACACCAGAAACATTTGCTTTAGA  
GTCCGATCTATTATTGGAGAAGCCTCATTTTGAGTCCATTGCTGATGAACCTCTAGACGAGC  
AAATTTATAGTAAAAGACAAAAGGTAGACCTAAATGAAGGTTATGAAGAAGATAAACTATTG  
CCATTGGCACTACGTCAAGAAAATATTCCAAGTTGTTGCTGGATTTGAACCCTAACGATCA  
ACCTACCCTATCTGATTACGACAACATCCAGTTGCTGTTACGTCTTTACACCATAAAGAACA  
CAACTCCGGCCAAGGATCCTCTTGTGGAAGAAGAACTTACTGCTTTGCTTTCTAGAATATTA  
TATCAAACCGGTGACAAAAATTTGGTCTATTTTCGCCCGATCATTATGGGAAAGGTCAATTTAT  
TGAGACAACAAAGGCTAAAACCTATTGAAAGAGGACTTTTACAAATGCAATCCCTCGTAGAAG  
AATTGGATTTGAAGATTAAGAGTAAATTTGGTTCCAAGTTCAAGCGAAATCAATGTTGCTAGC  
AGGCTGTCATACATCCACCAGCTGCCGTTTCATCCCTAGGTGGCAATTTGGATGCCACCTTAGC  
TGAAAAATATATGTCGCTGGGTATTTTGAAGTCCGCTGTGGAATTTATGAAAGACTTGGTA  
TGGCATGCGAGACTGCATTATGTTATGCCGCTGTTGGAGATGAAAAAAGGCAGAAGAAATC  
CTTCTTCAAAGAATAAATGAAAATGATTTCGGATGCCAGGGCTTACTCCATTTTGGGTGATAT  
AAAACAGGATCCATCCCTATGGGAAAAAAGTTGGGAGATTGGAAAATACGTCAACGCAAAAA  
ATTCCCTTGCAAAGTATTACTTTAATCCTCCTCAAAGTCTGGAGCACAAACCAATTTACTCT  
GCTACCTTGAAACATTTAAATGACTCGTTAAGGCAATACCCATTAAGCTTTGAAACGTGGTA  
TTTTTATGGTTGCGTTGGATTACAATGTGGTAAAATGCAGATAGCTGCGGAGGCATTTACCA  
GATGTGTTTCATTAGACCCTTATCATGCTCTTTCATGGTCAAATTTGAGCGCTGCATATACG  
AAAATGGATAAATTTGAAAGAAGCTTATAGTTGTTTGAAGAAGAGCCATTTTCATGTGACGCTCA  
AAAGAAGTGGAAAATTTGGGAGAATTACATGCTTGTGCTGTTAAGTTGAATGAGTGGGAGG  
ATGCTTAACTGCATGTAACAATTAGTCAGTATTAGGAGGGACAAATCTGGCGAAGGTTCC  
ATCGACTTACCAATTATTGAAAACTAGTAGAAGTATTAGTACTAGTGAATATCCAGAGGA  
GCCGCAGCAATTATCTTATTTCAAAGAGCTGTACTGAGTTTATCTGTAACACTTTACCTC  
AGGTAATTACAACAGTGCAAGATGTTGGCGACTGGTTCGCAAGAGTAGAATTTGGAGGAAG  
AGACCATGGGCCGCCCTAGAATGCCACGAGAAGGCTTATAGGGCCATTTCTCACAATCCTGA  
TTTAGAAGTTGAAGAAAAGGTTTGGAAATGATACAGTGGATGCTTGTGAAGATTTGGTGGCTG  
CCTATGAATCACTTGGTGAATGGAAGGTAAATATGGGCCAGGCAGTCTGGTTTTGCAAAGAC  
TGGAAATACAAATGTAGATCTACTATCAAAGCTCTAATGAGTAAAGGCAAAGGCAGATGGGA  
TGACTCTCCTGGTTGGGATAGGCTAGTGAAGCAAGAAGCCAAATATGA

>YLR420W 0.81 Cold

ATGGTACAAGAAATCGATTTAGGTTTGACATGTGATATGCATGTTTCATGTAAGAGAGGGTGC  
GATGTGTGAACTAGTCACCCCCAAGATTAGAGATGGTGGGGTTTCAATTGCTTACATCATGC  
CAAATTTACAACCTCCAATTACCACACTAGATAGAGTGATTGAATACAAAAAGACACTGCAG  
AACTAGCTCCTAAACTACCTTCTTAATGAGTTTTTATCTTTCAAAGACTTAACTCCAGA  
TTTAATTCATGAAGCTGCCCAACAACATGCCATTCGTGGAGTAAAGTGTATCCAGCGGGAG  
TAACAACAAATTCGGCTGCTGGGGTGGATCCAAATGACTTCAGCGCATTTTACCCAATTTTC  
AAGGCTATGCAAGAAGAGAACCCTGGTATTAATTTGCATGGGGAAAAACCTTCTGTCCATGA

TGGAGACAAAGAACCTATTCATGTATTGAATGCAGAGGAAGCCTTTTTGCCAGCCTTGAAAA  
 AATTGCATAATGATTTCCCAAACCTGAAAATAATTCTGGAACACTGCACTAGCGAGTCGGCA  
 ATAAAGACAATCGAGGATATAAATAAGAACGTGAAGAAAGCCACTGACGTAAAGGTTGCTGC  
 CACATTAACGGCTCATCACTTATTTTTAACAATTGATGATTGGGCCGGAAATCCGGTAAATT  
 TTTGCAAACCTGTTGCGAAACTTCCAAATGACAAAAAGGCTCTAGTCAAAGCTGCTGTATCA  
 GGGAAACCATATTTTTTCTTTGGATCTGATTCAGCACCTCATCCTGTACAAAATAAGGCCAA  
 TTACGAGGGTGTGTTGCGCAGGAGTTTACTCACAATCTTTTGGCATCCCTTATATCGCCCAAG  
 TTTTTGAAGAGCAAAATGCCTTGGAGAACTTAAAGGGCTTGTGTTCCGACTTCGGAATTTCC  
 TTTTATGAGGTTAAAGATAGCGAAGTGGCTTCTTCAGATAAGGCAATATTATTCAAAAAGA  
 ACAAGTTATCCCTCAGGTTATCAGCGATGGCAAAGACATAAGCATCATCCATTTAAAGCAG  
 GTGATAAACTAAGTTGGTCGGTGAGATGGGAACCTCGTTAA

>YJR132W 0.71 Cold

ATGGATATTACAGAATTGTTACAGTGCTTTGCCTGTACTTTGGACCATAACGCTGCCGTAAG  
 AACTAATGCAGAAACACATCTTAAAAATGCAAGTAAAGTACCGGGATTCTTAGGCGCATGCC  
 TGGATATCATTGCTGCTGATGAAGTACCAGAAAACATCAAATTATCAGCTTCCTTATATTTT  
 AAGAATAAGATTACATACGGATGGTCTGCTGGTGCAAGACAGGGTTCAAATGAATTATTAGA  
 TTCACATGTTGATCCGGATGAAAAACCAGTAGTAAAGATATGTTAATTAACAATGGTCA  
 GTGTGTCCAAGACCTCCCGCGTGTGATCAGAGTGCTAAAAATCTGCCCTTACTGTAATTATT  
 TCAGAAGATTACCTTAGCAAAAAATGGGGCAATTTGTTACCAAATTCCTTAGAATTACTCGC  
 AAATGAAGACATCACAGTAACATATGTCGGACTTCTGTGCTTGCTGAGATTTTTAGGACCT  
 ATAGGTGGAAGAATAATGATGAAAGACAGGACTTAGAAGAGTTGATTTTAAATTATTTCCCT  
 GCTTTATTAACCTATGGCGCAAATGTCTTTTCCAAGATGGTAAATATATGAATAACGAGCA  
 AATTGGCGAATTGGTAAATTAATCATTAATAATTTATAAGTTCGTTTTCATACCATGACCTAC  
 CATTTACATTACAACGCTCAGAATCGTTTACCCCATGGGCATGTTTTTTTTGTCAGCATCATT  
 CAGCAGCCATTGCCCTCAGGAAGTTTTGTCTATATCAGATATTGAGGTCAGAAGTAAAAATCC  
 ATGGGTCAAATGTAAGAAATGGGCTCTTGCAAACCTTTATAGACTTTTTCCAGAGATACGCAT  
 CAACGTCATTAACAAGGAAGTTTCAGTACGATGAGTTTAAACAGATGTACTGTGAAGAGTTT  
 TTGACTCAGTTTTTGCAAGTCGTCTTCGATCAAATCGAGAAATGGGGAACCTGGACAGTTGTG  
 GTTAAGTGACGAATGCTTATACTACATATTGAACTTTGTTGAGCAGTGTGTTGTGCAGAAAA  
 CAACTTGGAACCTTGTGTTGGGCCCCACTACAATGTAATACTTCAACATGTCATTTTTCCACTA  
 CTAAGCCCACTGCAGAGACTTTGGAGGCCCTTTGACAATGACCCTCAAGAATATATCAACCG  
 GAATATGGACTTTTGGGATGTCGGCTATTCCCAGATCTTGCCGCACTGGCTTTGCTAACGA  
 CATGCGTGACGAAACGCGGTAAAACGACCTTACAACCGACCTTAGAATTTATGGTCTCAACC  
 TTACAAAGTGCCGTTGGTGATTACAACAATATTATGTTGGATAATGCCCTGCAAATTTAGTTC  
 CTGTTTGAGAATATTCTCCAGCATTATTGACCGTTTGATAACTAAAGATTCTCCATTTGCCA  
 GTGAGATGGAAAAGTTTTATATTGACATACGTTTTTACCTTTTTTTAAGTCTCAGTATGGGTTT  
 CTGCAAAGTCGTGTTTGCAGATATTTGTTGCAAGTTGGGTTCTATGGATTTCAAAGACCCGGT  
 AATAACCTCTACTATCTACGAAGGTGTTATGAATTGTCTGAATAACTCTTCTAATTTCTTAC  
 CTGTAGAATTGACAGCTGCATTGGCATTGCAAACCTTTTATCAGTGATGACCAGTTTAATATG  
 AAGTTATCCGAACACGTTGTTCTACTATGCAGAAATTACTAAGTTTGTCTAATGATTTTGA  
 ATCTGATGTCATTTCAGGCGTTATGCAAGATTTTGTGGAGCAGTTTGTGAGCAATTACAAC  
 CTTTTGGTGTTGAATTAATGAACACTTTGGTCCAACAGTTTTTGAATTAGCTATTGATCTG  
 CATGAAACATCCAATTTGGATCCAGATTCCTTCACGAACGTTGATAGCATACCCGATGAATC  
 TGACAAGCAAATGGCGGCGCTAGGTATTTTTGTGCGACTACGATATCTATTCTGTTGTCTTTG  
 AGAATTCACCTGAAATTTTAAAAAACTTGGAACAGTCATTTTATCCAGCTGCAGAGTTTATT  
 TTGAAAACGACATCGAAGATTTCTATCGCGAATGTTGCGAATTTGTAGAGAACTCTACATT  
 CCTACTAAGAGATATCACACCCATCAGCTGGAAAATTTTGGAGCTGATTGGAGAATGTAATA  
 GAAAACCAGATAGTATGGTATCTTATTATTTAAGTGATTTTCATGCTAGCCTTAAATAATATC  
 CTCATTTATGGAAGGAACGAATTAAGAAGAACGAGTTTTACACAAAAATCATATTCGAAAT  
 ATATCAAAGGCTGTTACTGCAGAAGATAATTCGTTAGACGATCTTAGAGTGGTTTTTTGATT  
 TATCCCAAGAGTTGGTCTTGCATTAGATGACAGTTTACCTCAACAATACAGAGAGCGCCTA  
 CTGGCGGATGTTGTGCGGCTCTATTCTAACGCAAAGAATGAATTGAAAACATAATGTTGTATT  
 TAGTGTGACTGCTTTTTAATGTGTAATCTCAAATATGATAACAGAGCCTTTGATCACGCTTC  
 AGTACCTGAAACAGCAAGGTTGTCTTGAATCTTCTTTCAAACGTGGATTACAGACTATATT  
 CCGAATTATAAAAGGTGCTATGATATCAAATATCAGTTCTTTCGCTTATTAAAAATTATACT  
 GAAGTTAGAAAAGCAACGATTATTCAGTGTGAACTTAGAAAATTTGGTTCCGCAATTAGGGA

GTATTGTTACGCAGTTAGCTTCGAGGCTACCAACGGCGTTAAGGCAATTAGCTAACCAACGC  
 AAGGAATTCTCATCATCCGGTTTTGAAGAGGATACTAAGTGGGATGAAAAATTTTCTTGACGT  
 TGGAGACGATGATGAAAATGATGACGAGGGAGACCTTACTGAGAAATATCTGGAACCTGATAA  
 AAAATAGAGCCGATTCCTTGGACTTCGTAGATGGTTATGACGCAAAGGAACTTTTCGATGAC  
 CTAGAAGAGGACCCATTAACGGGGTCGATCCTGGACACAGTTGACGTATAACAAGGTTTTCAA  
 GGAGTCCATTGCGAECTTACAACATGTTGACAGCAATAGATATCAGGGAATCTTGAGACATC  
 TGACCCCGCTGATCAAGAACTATTCATGGGAATTATGAATGCCTAA

>YNL158W 0.75 Cold

ATGGTCCGGCCTCAGAATGTTCACTGGTTTTATCGCTACAATTGTATTTTTTCATCGGATTTGT  
 ACACGCTAATACAGAATCAATCTTATATAAGGTTCCCTCACAACTTTCCCTCAAAAAACCAA  
 GAGACAGCTCTACTTATGCAAGAGATGTAACTTGATATCTTCCATATCACTATCGGGAGAA  
 GCAATGAGTCAGATCACTATCGAGGCCAATACCACTGACTTGGAGTTGCATAATACTACGTA  
 TATTGAACTGGCGGACTTACAGCGAGACGAAACATATCAGATTAAAGTGTGTTGGTCAGCAA  
 TACATCCAATTTCCATTAATAATCTCCAACTATCACAATACCACGTTTCACTGAATTTTCAG  
 GGAECTAAGTCAGACTACGCGAGAATACTAGTGACTTTCCAGGTCTTGTCTGACTCGTATCC  
 TAGTGAGCATGCCATGGTTCCAATACAAGTCTCATTAATCACCCTCGGCTAGGTATCCCCG  
 TGGATATTTACCCAACATTAATCGTTATGGTGCTATTAGTAGCAGGGCTTGTGTTACCCGG  
 GCACCACACGTATTGAACGATCTTTTGTGAAATTTTAG

>YGR110W 0.81 Cold

ATGTTCAAGTCAACTTTAACTCCATAATAAGAAGACCCCTTGAAAGGTTTTCAACTTCTTAG  
 AGGGGCTGACTCATCGAATACACGGCCACAGTCCCCTAGAGCCTCCGCAAGAGATGTTACAG  
 AGAAACAGATATTAAGAACTCCGTCAGCACCAACTGCAATACCATTAAGGGAGATTATCTAT  
 AGAGTCCCAAGCTTGTTCCTCGCCCTTTAGAAGATTCTGTTAAGGACTTCCGAGATTTTAT  
 CAAGAACGAGGATGCATTCCAGACTGAACTTTTGA AAAACGCTGCCATTCTACCCCACTCCTT  
 CGGAATCAAAAACAGCAAGACTTATAAGAACTGTTGTTGATGATGAGGGCAATTACATCAAT  
 GAATTTTGCATACGCCCTCGAAAAACCTCAGTGCCTGAGGCTGACTTAAAACATCTGGTTTT  
 CATTTCATGGGTATGGCGCCGATTTGGGTTTTTTCATCAAGAATTTTGAGGATATTCCACTAT  
 TGGATAACGAGTGGTGCATACATGCCATCGATTTGCCTGGGTATGGTTTTTCTTCAAGACCT  
 AAGTTTTCCGTTTCGAGTATCCGAGAGATAATATTCACAGCGTTCAAGATTGGTTTTCACGAAAG  
 AATACACACATGTTTTAGTAAAAGAAATCTTTTGAACCGACCTGAGAAAAACATTGTTATGG  
 CACATTTCTTTAGGGTCTTACTTGATGGCTTTATATTTGCAAAAATATAAGGAATCTCCATCT  
 TTTAAAAGCTGATCCTTTGTTCCCCAGCAGGCGTGTCTTATAGAGATTTCAACAATACTGC  
 TTCAGAGGTTGAAAAATGGAAACCGCCTCCTTGGTGGTATGTCAAGCTTTGGGACAGAAATA  
 TCTCGCCTTTTACACTAGTAAGAAATTTTCGCCAGTTAGGTTTCAAGATTACAAGTGGATGG  
 TCATATCGGCGCTTTAAGCACATTTTTGAATGGTGTATCCAGAACAGTCAAAAACGGTTTTGAAGC  
 CTTGCATAGATACGCATATGCTATTTTTCAATAAACGTGGTTCAGGTGAATACTTATTAAGCT  
 TTGCTTTGAAATGTGGTGGTGAACCAAGACTATCATTGGAGCAGCAGCTATTCGATGGCAA  
 AAGTCTGATATTTTAAAGAATAGTAATTGTGACTGGCTTTGGCTTTATGGCGATGACGATTG  
 GATGGATGTGAATGGTGGACTTAGAGTATCAAGATTCTTGAAGAGAAGTTGAAACAAAAAA  
 GTAACGTCATCATTTCTCATTTCAGGGCATCACTTGTACCTGGATAACTATAAGTTTTTC  
 AATAATATTCTTACGAAAGAAATGCAAAAAATATAA

>YGL078C 0.82 Cold

ATGACAAAGGAAGAAATCGCAGACAAGAAGAGAAAGGTTGTAGATGAGGAGGTAATTGAAAA  
 AAAGAAGAGTAAGAAACACAAAAAGGATAAGAAAGACAAGAAGGAAAAGAAGGATAAAAAAGC  
 ATAAAAAGCATAAGAAGGAGAAGAAGGGTGAGAAGGAAGTGGAAGTACCAGAGAAAGAATCT  
 GAAAAGAAACCTGAACCTACTTCTGCAGTGGCTAGTGAGTTTTATGTTTCAGAGTGAAGCACT  
 AACCAGTCTTCCACAATCTGATATTGACGAATATTTCAAGGAAAATGAAATTTGCTGTTGAGG  
 ATCTCTGGATCTAGCCCTACGTCCGCTATTATCATTGATTATCTTTCTTTAGACTCTTCC  
 ATTC AAGCAGAAATTTCCAAATTTCCAAAACCAACGCCTATTC AAGCCGTAGCCTGGCCATA  
 TTTGTTATCTGGTAAAGATGTTGTTGGTGTGCTGAGACCGGTTCTGGTAAAACATTTGCTT  
 TCGGTGTTCCAGCTATCAGCCATTTAATGAACGATCAAAAAGAAAAGGGGCATACAGGTTCTA  
 GTCATTTCCCAACTAGAGAACTTGCTTCCCAATTTATGATAATCTGATTTGATTAACCTGA  
 CAAGGTTGGTATGCAGTGTGTTGTTGTTTATGGTGGTGTCCAAAGGATGAGCAAAGAATTC  
 AGTTAAAAAGTCACAAGTGGTGGTGTGCTACACCTGGTAGATTATTAGACCTATTGCAGGAA



GGATCTGTTGACTTATCTCAAGTTAATTACTTAGTATTAGACGAGGCAGACAGAATGTTGGA  
 AAAAGGTTTTGAAGAAGACATCAAGAATATTATCAGAGAACTGATGCGTCCAAAAGACAAA  
 CTCTAATGTTTACCGCTACCTGGCCAAAGGAAGTCCGTGAATTAGCTTCCACGTTTATGAAC  
 AACCCAATCAAAGTATCTATTGGTAACACGGACCACTAACTGCTAACAAAAGAATTACACA  
 GATTGTTGAAGTGGTGGACCCACGTGAAAAAGAAAGAAAGTTATTGGAACGTTGAAAAAGT  
 ACCACTCTGGTCCAAAAAGAATGAAAAGGTCCTGATTTTTGCTCTTTATAAGAAGGAAGCT  
 GCTCGTGTGAAAGGAATTTGAAATATAACGGGTATAACGTCGCAGCTATCCATGGTGATTT  
 GTCCCAGCAACAAAAGAACGCAAGCATTGAATGAGTTCAAAAAGCGGGAAGTCTAACTTGTAC  
 TGGCCACCGACGTTGCAGCAAGAGGTTTAGATATACCAAATGTTAAGACAGTTATTAATTTA  
 ACTTTCCCATTGACTGTGGAGGATTATGTCCATAGAATCGGTAGAACTGGTAGAGCTGGTCA  
 AACAGGCACAGCACACACTCTGTTCACTGAACAAGAAAAGCATTGGCTGGTGGACTGGTTA  
 ACGTTTTGAATGGTGCCAATCAACCTGTTCTGAAGATTTGATAAAGTTCGGTACTCACACT  
 AAGAAGAAGGAACATAGCGCTTATGGTTCATTCTTTAAGGACGTCGATTTGACTAAGAAACC  
 AAAAAAATTACTTTCGATTAG

>YJR001W 0.75 Cold

ATGCCTGAGCAAGAACCATTGAGTCCCAATGGCCGTAAGCGCTCTGAGGTTCACTATATCTC  
 AATCCCATTGAACAGAGGTTCCGCATTCTCACCAGATGATTCTGTATCACAGTTTCAGTCTG  
 ACGGGTTCATGACACGTAGGCAATCCATATTGGACCATCCTGTGGGCTCATTTAAGGGAGTT  
 AATTCTTTTAAGTCGATTTGCGACTTCGTTGAGGAGAGCCAATTCGTTTCGTAATATCGAGCT  
 AAATGCGGATAATGAAAGATCCTTTTTCAAAGAGAGTAACGATGAAACCTACGATCCGGATA  
 CTTTAGCACCAGCTTTGGACGGTAGAAGATTATCAGTAACTTTAAATAATGCTGGTCCGCCG  
 CGCATTACTAATTTGGCTAAACAACGATAGAGTTAGTACAGCCAGCATGGCTATTCACGATGA  
 TGATTATGGGTCCATCCAAAATTCAACAATTGGGGATTCTGGGTCAATATTACGCCCTACTG  
 CCTCCTTAACAGAAATGATGAGTGGTGGAGCGGGGAGAAGGTTTACAAAATAATGACATGGAT  
 TCAATTGTAGTGAAGAGAGTGGAGGGTGTAGATGGTAAGGTAGTAACTCTTCTTGCTGGTCA  
 GTCGACCGCTCCACAGACCATAATCAACTCAATCAATGTACTGATTGGTATTGGGCTCCTGG  
 CGTTACCTCTTGGTTTTGAAATACGCCGGCTGGGTTATAGGACTTACTATGCTTGAATCTTC  
 GCCTTAGCGACATTTTGTACTGCTGAACTTTTGTCTAGGTGCCTAGATACAGATCCAACCTT  
 GATATCTTACCGGACTTGGGATATGCAGCATTTGGTACAAAAGGGCGCGCACTAATTTCTG  
 CTCTTTTACACTTGGCTACTGGGTAGTGGGGTGTCTTGGTGATTCTCTTCCGAGATTCT  
 TTAATGCTCTATTTCCCTCAATACTCCACCACTTTTTTCAAATAGTTTCATTTTTTATCGT  
 TACACCCCGGTTTTTATACCATTGAGTGTCTATCTAATATCTCGCTTCTGGGAATCCTTT  
 CAACAACCGGAACGTGTGCTAGTCATTTGCTGCTGCGGACTATACAAGTCGCTTCTCCAGGT  
 TCATTAGTTAATCCGATGGAAACGAGCATGTGGCCGATAGATCTAAAGCATCTCTGTTTATC  
 TATAGGTTTTATTGAGTGCCTGCTGGGGAGGACATGCGGTTTTTCCCAACTTAAAGACAGATA  
 TGAGGCATCCAGATAAAATTTAAAGACTGTTTGAAACTACCTATAAGATAACATCGGTTACG  
 GACATAGGTACTGCAGTTATTGGCTTTTTGATGTTTGGAAATCTTGTTAAAGATGAAATTAC  
 TAAGAACGTTTTGCTGACGGAGGGATATCCAAAATTCGTTTATGGTCTGATTTTCAGCGCTTA  
 TGACTATCATTCCCTATCGCAAAGACCCCATGAACGCAAGACCTATCGTTTCTGTATTGGAC  
 GTTCTGATGAATGTGCAACACATAGATGAAGCGGCCAGCGCCATAAAAAGAAGAGCTGCGAA  
 AGGCCTTCAAGTATTCAAATAGGATCTTTATTAATGTTGTCTTCTGTTTTGATAGCTATTAATT  
 TCCCTGAATTTGATAAGATTATCGCATTTCTGGGGGCCGTTTTGTGTTTTACAATTTGCCTA  
 ATTTTGGCGTGTGGTTCATTTAAGATTGTGCAAGACAACAATCAAACCATGGGAGAGAGT  
 GGCTTGTACGTAACCATATGTATTAGTGTCTGTTGTCCACATTAGGTGTTGGTGTCTGCAA  
 TTATTTTCATAA

>YKL219W 0.79 Cold

ATGCAAATAGTCAGAAGTTGTAACCTCCAATAACAAACCCCTCATACCGTCCCAAATTTGGCA  
 TATCGCTATCAGAAATGAGAGGCGATGGGGTTAAAGATAGGAGTATAGATGTGTTATCCCTCA  
 AACATTTCGAATCCAGAAAAGTTGTTCTGCCTCAAGACCTTTTCATGGATAACTTCACCTGG  
 ATGTTTTATGAGTCTTCAAGTGCTTCACGTTTCGTACCTGGTTGCTATTATTACTGCTAAT  
 GTGGTTGCCAGGTTTTCTTTCGCAGATAAAGTCCATCAATCGGATTTTTCCGTTTTAACTTT  
 GTATTTTAGTCTCATGCCTAGTGGGGATATTTTTACCCAATATTTATTCATTCTCTCATAAA  
 AGTGTGTTAACGAATCAACTTACTCAGTTCTCCAAGAAAATGTTGAACATGCACCAGGTAC  
 TGATACTCATGATTGGGAAACAGTTGCGGCAAATCTAAATCTTACTTCTATGAAAATAAAG  
 CTTGGAATACTGAGTACTTCTTTTTCAATGCTGCAGAGTGTCAAAAAGCATTTCAGAAAAGTT

CTTCTCGAACCATTCTCTGTGAAGAAAGATGAATCTTCGAAAATAAAATCATTTGGGGATTCT  
 TGTCCCCTACATCGAAGAGGCCCTTGCAAGTCTATTCCACAGAATTTGACAAAAAGTGGAAGT  
 TGTCAATACTGAGAAAGTGTGGAGCCCTGATAACTTGGAACATGTTTCAGCTCCCCAAGAAA  
 ACTTATCGTTATAAGTTTACCTGGGTTCTCAAGAGGATTTTCAATCTCTGGCTTTTTCCAGC  
 ATTTATTCTGTTTCTGGCTTGTATCTATGTGTCATGGGATAAGGGCCATCTATTTTCGTATCT  
 TGTGTTGTGGGGAGGTTTTCTCCTTATGGTAAGAGTTTTTCAAATATGAGGCCCTTTTCC  
 ATGCACATGGAAGACAAAATGCAGTCTTGTCAACGATTATAAATGAGCAAGAAAGTGGTGC  
 GAATGGATGGGACGAAATTGCAAAGAAAATGAACAGGTAAGTGTGTTGAGAAAAAAGTCTGGA  
 CTAGTGAAGAGTTTTTCTTTGATGGGATTGACTGTGAATGGTTTTTTAACCCTTCTTTTAC  
 CGCCTTCTATCTACAAAGAAACCTATGTTTGATAGACCTCTAAACGTGGAACCTATGGCCATA  
 CATTAAAGAAGCGCAATTGACCCGCAAACAGGCGCCTCCCGTGTAG

>YIR021W 0.82 Cold

ATGTCCTCCGAAGAATAACAAGGTCCGGTATCCCGGCTATAGATTTGTATTGCCGCAAAGC  
 AAAATTTTAAACTCTAAAATCATTTGTCGATGATCCTAGGTAGTAAAAAAGAATGGTATGACA  
 CTA AAAAGGCGCCATTGAGAACCCTTTTTGGTCTCTCGATGTGGCATTTCGAGCAGTTGAGG  
 GGTCGTCTCGTTGAAGATGGCAAAGTCAACTTGTTTAGTGTTCCTGACAAACGACTCATT  
 TTCTTTTTGCAAGATGACCGTTGATGATAAGTTCAACACTAGCTTGGTCGATTGGCAAAAAA  
 TACCCTTTGACAGTACATTTGCAACTGACAGAAGACAGAATATCAGTTTACTACCTGTTGAT  
 ACCTGTTTGAACGAAAAGATCATATCGATTCTTGGTGTATCTCCTAATATGACGAATCT  
 TGTTCCTATAGAAAAGAGAGCGATCAGACCTGGTGGATTTTAATTGTAAACTGCAATCAAACA  
 TCCTAGAACACCTACTATACGCGAAATGCCAAGGAGTGTACGTAACCTCTACCAATGAAAAA  
 GCTCGTTTTGCTTGCAGCTGTCTGCAATCCTGAATTCATTGACACCTTCTGGTGCGAATTGAC  
 TCCATAAGAGTCTCATTAAAGGAAAACCTTCCATTTCTGTACCTCGAGAATATCAGATGT  
 ACGATCCGGTGGTACGTGCCACTATAAAGGAGGTTGTACCAAGCGATTACTGCGATCCGCC  
 TTCGATAATGACATCGACCCGCTAATGTGTCTTCATTTGGATAAAGGCTGGAAACTTAAATT  
 CCCATACTATCCTCGACAACGGGCCATAACTTCTCCCTGAAGGATTGCTTTTCCCTGGACA  
 CAGGAAAAGATGCATCTGATATGACAGAGGTGTTTTCTCGCTACTATGGAGTCGAGTAAAGTT  
 CTTCTGACGTATAGCAACCTCGTTGACATTGTGATGAAGGACAATGGTAGGTTGGACTCAGG  
 CGTCCTAAAGCAATTC AACGACTACGTTAAGCAAGAAAAGCTCAATCTACAACATTTTCAGG  
 CCGTTCCCTCAAAGTTTTCTCAAAGGCGCAAAGATATAA

>YFL057C 0.76 Cold

ATGGCTAGGCATTTCCGGTATGGCCCTCGCCCCATGGGATGTCATGGGAGGTGGAAGATTTCA  
 GAGTAAAAAAGCAATGGAGGAACGGAGGAAGAATGGAGAGGGTATTTCGTTCTTTTCGTTGGCG  
 CCTCTGAACAAACAGATGCAGAAATCAAGATTAGTGAAGCATTGGCCAAGGTTGCTGAGGAA  
 CATGGCACTGAATCTGTTACTGCTATTGCTATTGCCTATGTTTCGCTCTAAGGCGAAAAATGT  
 TTTTCCATTGGTTGGAGGAAGGAAAATTGAACACCTCAAACAGAACATTGAGGCTTTGAGCA  
 TTAAATTAACACCAGAACAATAAAGTACTTAGAAAAGTATTATTCCTTTTGATGTTGGTTTT  
 CCTACTAATTTTATCGGTGATGATCCGGCTGTTACCAAGAAGGCTTCACTTCTCACGGCAAT  
 GTCTGCGCAGATTTCTTCGATTAA

>YGR017W 0.78 Cold

ATGTCGCATCAAATGGCGCCATGGATACCCATGTTTATTCAATCGTGCAAAAATAACACTGA  
 ACCGTTTGTATCATTTCAATTTGCTACTGTTGACGAACTAACGAACAAACCACGTTGTAGAA  
 CGGTAGTGTTCAGAGATTTTTTATTTTCATGACAAAAGAACTAATGTGTTGACTTTTAACT  
 GATATGAGGAGCTCAAAGATAACTGAATCATTTATAACTCAAATTCAAATAACTCTAGCGA  
 CAGCAAAGATGTGAGACTCCATTTTTCGAAGCATGTTTCTATTTCCCGGAAACTTGGGAGC  
 AGTATCGCTTCAGTGGCCAATGCTTTACAATATCTAAACAATTTAAGAAAATACCGGCTGAG  
 ATTGTAACCAAGTATGACATATTTTACC CGGTTTTTCAGAGACAAATGATGACAGCACTGA  
 CGAAGAAATAGATACTCCAATTAACGACGACGACGACGACGATAAAAAATAATGACGCCGACA  
 ATAATGACATTAACGAAGATAACAACTTATAGAATCCATAGAGAACGATGAACACCATGAG  
 GATGAAGACGACTACTACCCTCAACCACAAGAATGGGAGGCTGAATTACTAAGACAATGGTC  
 CTCTCTATCAAGGCATACCAAGTCATTGTATAGGAAGCCAGCCCCGGGCCAGAACTTACCT  
 CTGAAACTAGCAAACAACCTGGACAAACTCCATAGAGGAGTTGACGGTGCTAAAGAGGACGCT  
 GGACTGGA AA ACTTTGGTATTGTCTGTCTTTGTGTTGATTCTGTTGATTTTTGAACTTGAA

AGAGGGAAGAGGTGGTGAAAGATGGATTTTCCAGAAAACCGACGGCAAAGACGAAGATCTGT  
GGGAGGAACAAGAAGTGTGTCCGTGA

>YPL214C 0.8 Cold

ATGGTATTTACTAAGGAAGAAGTTGATTACTCATTATATCTGGTTACAGATTCTACCATGCT  
TCCACCGGGAACACTTTTATGTTCTCAGGTTGAAGCTGGGTTGAAAAATGGTGTAACGCTAG  
TTCAAATCCGTGAAAAGGATATTGAAACAAAAAATTTTCGTTGCAGAGGCTTTAGAAGTTCAA  
AAAAATATGTAAGAAGTACAATGTTCCACTTATTATCAATGACCGTATAGACGTCGCTATGGC  
AATTGACGCCGATGGGGTTCATGTGGGCCAGGACGATATGCCAATCCCAATGGTAAGAAAAC  
TTTTGGGCCCTTCTAAAATTTCTGGATGGAGTGTGGTAAACCTTCGGAGGTAGAGACATTG  
GCTAAATGGGGGCCAGATATGGTAGATTATATGGTGTGGTACTCTTTTCCCTACATCAAC  
AAAGAAAAATCCTAAGAAATCACCCATGGGTCCTCAAGGCGCCATTGCCATTTTGGATGCTT  
TGGAGGAATTTAAAGCTACATGGTGTAGAACCCTGGTATTGGTGGTCTTCATCCTGACAAT  
ATTCAACGTGTGCTTTGTCAATGTGTTGCTTCAAATGGAAAGAGATCGTTGGATGGTATCTC  
TCTAGTCAGCGATATTATGGCCGCTCCAGATGCATGTGCAGCAACCAAGAGGTTGAGAGGCT  
TGTTAGATGCTACCAGATACCAATTTGTTGAGTGCAGGTTAAATAATACATTTCCGACCACA  
ACTTCAATTCAAAACGTTTATATCTCAAGTATCAAACAATCGTCCATTAGTGCAACATATCAC  
CAATAAGGTTTCATCAAATTTTGGTGCCAATGTCACTCTAGCTTTAGGCTCATCTCCTATCA  
TGTCTGAAATTGAAAGTGAAGTATCTGAACTAGCAAGAATCCCAAATGCTTCTTTACTGTTA  
AATACCGGATCAGTGGCACCTATTGAAATGCTAAAAGCCGCAATTAATGCTTATAATGAAGT  
AAATAGACCCATCACCTTTGACCCGGTTCGGGTACAGCGCCACTGAAAACAAGGCTCTGTCTAA  
ACAACACTTTTGCTCACTTACGGCCAATTTGCTTGTATAAAAGGGCAATTGCAGTGAAAATACTG  
TCTCTAGCCAAGTTAAATAACCATAAAATGAAGGGCGTCGACTCTAGCAGCGGCAAAACGAA  
CATCGACACACTTGTGCGCGCTACACAAATTTGTCGCAATTCGAATACAGGACTGTTGCTGTTT  
GCACGGGTGAGTTTGATTGCGTTGCTGATGGTACTTTTGGAGGCGAATACAACTTTTCATCA  
GGAACAGAAGGAATAACCGCTGAAGATCTTCCATGTGTAATAATTGAAGATGGCCCAATTCC  
TATCATGGGTGACATCACTGCAAGTGGATGTTCACTTGGTCTACAATTGCTTCCCTTTATCG  
GTGGGTTAGATTCCACTGGAAAACGTTTGGATGCTGTGGTGGTGTGCTGCTCCTATTATACAAA  
TCAGCTGGTAAAGTTGGCTTCCACCCGTTGTCAAGGAAGTGGTTCATTCCATGTGCAATTGAT  
TGACGCATTATATCAATTATTCCATGAAAATAAACAGAAAAGTGGTCCGCTTCTTTGAAGA  
AATTCAAATAA

>YNR006W 0.75 Cold

ATGTCGGTTAGCACGCCAAGTGAGTTAGACGCATTAATAGAACAAGCCACTAGTGAGAGCAT  
TCCCAACGGTGACCTTGATCTCCCATAGCGTTGGAAATTTTCAGATGTGTTAAGATCTAGAA  
GGGTAAATCCCAAAGATTCTATGCGTTGTATAAAGAAAAGGATTCTCAATACGGCCGATAAT  
CCAAATACCCAATTGTCTTCTGGAAGCTTACCAATATATGTGTAAAAAATGGTGGAACGCC  
TTTTATTAAGGAAATTTGTTCCAGAGAGTTCATGGATACCATGGAACATGTCATTTTAAGAG  
AAGATAGCAACGAAGAACTTTCTGAGCTGGTAAAGACCATATTATATGAACTATACGTAGCC  
TTCAAAATGATTCGCAACTTAACATATGTGGCAAAAGTTTATGATAAATTAATCTCTCGTGG  
CATTAATTTCCCTGAAAAGCTAACACTTTCCAATTTCTCCGACTGCAATGTTTACTCGAAGA  
CGCCCGCAGATTGGATTGATTCTGATGCTTGTATGATTTGCTCCAAAAGTTTTCTCTACTA  
AATAGGAAACATCACTGTGCTCCTGTGGTGGAGTTTTCTGCCAAGAACACTCATCAAATAG  
TATACCCTTACCTGATTTGGGTATATATGAGCCAGTCAGAGTATGTGATAGCTGCTTTGAAG  
ATTACGATTTGAAGAGACATGACGACAGTAAAAAATCTAAAAAACATCGCCATAAAAGAAAG  
AAGGACAGGGACTACTCAACTCCTGAGGATGAAGAAGAGCTGATAAGGAAAGCAATAGAACT  
CTCCTTGAAAGAATCTAGAAAATAGCGCTAGTAGCGAGCCTATTGTCCCCGTTGTAGAATCAA  
AGAATGAGGTGAAGAGACAAGAAATAGAAGAAGAAGAAGATCCTGATTTAAAAGCTGCTATT  
CAGGAAAGCTTGAGAGAAGCTGAAGAAGCGAAGCTACGCAGTGAGCGTCAAAAAGCCTCTAG  
ACAGATGCAACCCCAACAGCCATCACCTCAACCTCAACCTATCCATTCCGTTGATTTATCTG  
ATGAGGAGAAAAGACAGCATATACATGTTTGTCTCACTTGTGCGAAAAAATGAAATCGAGGCC  
TTGAACGAAATTTTGGAAAGACTCTAAATTACAAAACCTTGGCTCAAAGAGTATTTGCTTCAA  
AGCAAGGTTGAATTATGCTTTAAATGATAAAGCTCAGAAAATACAATACTTTGATAGAAAATGA  
ACGGCAAGATTTCGGAAATTTAAGACATATACGATAGATTATTGGAGCAACAGCTACAAAGC  
ATCAATTTGTCTCAGCAATACACACTTCCACAAGTCCCTTCTGATCCGTACAATTACCTAAC  
AGAAAATGTGCAAAATCCAGCAGAAAGCTATCAAACACCTCCCCTCCAGCAACTATCATCTC  
ATCAATACAAACCACAACAGGATGTCTCACGCCAACCAATCGGTAAAAGCAAATTCATCACCT

ACCACTAATATTGATCACTTGAAAACCATCGATGTGACACCACACGCACAGCAAAAGCCTCA  
 ATCGCACGTTGAACTTGCACCTTCGGACCCACCTTATCCAAAAGAAGAGGCCGAAGATGAAG  
 GAACACAGGCAGTGCAAGATGAGGAATCCTCCACACAAGAATCCCGCGAAAGGCCGTATCCA  
 GTAGAAACAGAGAATGGTGAACTTCAATAAATAAACGGCCTCAAGGCATTACACGTTACGA  
 TTTTCCAACCTGTTCCCTGCACGCAAATTCGTCCAACCGGAGTCAACTGTACCACTTCTGCAA  
 GTTCTCTGAAATTCGGATCAAAGAGGAAAGGCCGCTAGTCCTCAAGAGGAAGTGTAAATA  
 GAGCTTTAA

>YOR322C 0.78 Cold

ATGGCATTTCACGTCTTACATCTACTCATCAGTCCAATCATAACGGCTACAGTAATAGCAA  
 CAAAAAAGGACAAAGTCTTCCACTAACCCCTTCTATTGATGTAGAATCACCGCCATGTGTTT  
 TTTATGGGTCTGCTATGGAATCCTCAGGTGCTGTGCTAAGTGGACTTTTTACTGTGACGGTT  
 GTCGATCCCTACAGTAGTGCTGAAGATAAATCTTTAAAGAATACAGAATCTAATGTGTGAC  
 TACTTCTAAAAGCCTAAAAAGAAAGAGTACATTTGGTTCTGCACTTTCATCTAGATTGTCCA  
 GCTTGTGACGCTGACGTCAAAATATCTCTCTTCAACATCTTCTACATCCATATCGCATTTCT  
 CCCACGCCTGCTAATTTAAGAATAATGGCTGGTTATACCAAGATCACCATTACGTGCGGTAAC  
 ACTAAGTTTGGTACAGAAGATCCATTTCCATAAACCCCTTGTGCCTAATATTTCTCAATGC  
 AAACCTGTATGAACTGTAAAACAAAGATTACAAACATGAAAAGCTGGGAAATTCAGAGTAAT  
 ACCCAGGATCTTTCTGTTGGAAGCCACTCTTACCCATTTTCTTATCTTATACCGGGGCTGT  
 CCCATGTTCTTTCATCGCTAGGTGCTACGGCTGAAACCCAGGTCAAATACGAACCTTATCGCTG  
 TTGTGACGTATATAGATCCTCATAGAAATTCCTTTTCTTCCGGTCATTCTACTCCAGGAAA  
 GAAGGAAGCTCTTCTAAGAAGCGGTTGTTGCAACTAGCGATGCCCATCGCCGTGACTCGAAG  
 TATACCGCGCGGGCCTGATAAGAATTCTCTAAGAGTATTTCTCTACAGAGTTAACTGCTG  
 CTGCTGTTCTTCTAATGTTGTATATCTTAAATCTACTTTTCTTTGGAGATGAAATTAGAC  
 GGTGTTTCTTCCGGGGATAGGAGATGGCGAATGCGTAAATGAGTTGGAGAATTGAAGAAAC  
 TACAAGAGTTAAAGCACATGCTTGTCCAGTGCACAAGCATGAATTGAGGCAGTTAGAAGAGC  
 AGGTTAAAATAAAAAGAGTCAGAAAAAAGTAAAAAGCCACGCAGTCATATTAAGCGTTATGGT  
 GAACTAGGCCACAAATCCGGTTGCAGTAAACTCTTTAGAAAATATGCCGTGCGAAAGGCT  
 TCCAGGCGAGCCCGTCTGTAACAAGCACCTAATTCCTTCCGGTCCAGCGTCAACTGGTAATG  
 TTGGACTTGATGATGAAAATCCTGTTAATGAAGATGAGGAAGACCAACCCGGTAGCGAATTC  
 ATCCATCCAGTGACGACGCTTTGCGTCAGGAGTTACTAATGCAGCAACAACGCGCAAGACA  
 ACAACAACCTCAACAAGAGCTAAAAACAACAGTAGTTTATTTACGGAAGAGGTTCCGATAA  
 TATCTAAGGGAGAAATGAAGAGTGGATGGAAAACCGATTTTGACAATAATGGAAAGATTGAG  
 CTAGTTACAGAAATAGATTGTATGGGACTTAATTCAGGCGTCTCTAATCCGGTAATGCATGC  
 ATCGACACTACAACTCCTTCCACGGGCAATAAGAAGCCAGCATCAATGTGGCTTGCGATA  
 TACAGGATCCAAATTTAGGTTTGTATGTAAGCCACATCTTGGCAGTGGAAATAGTTGTTGCA  
 GAAGAAACATTGCAATATGCCAATGGGCAACCTATACGGAAACCAAACTCCAAAAACAAGAA  
 AGAACTAATAACAATACGATGAATGTTCAATAATCCTGATCAACGCTTAGCTGAATTATCTC  
 CAATTTTTGCAAAATAGAAATACACCGAAAGTACGGCGCATGGGGCCTGAAGATATAACCCG  
 GTGAATAGTAATAAGTCCAACCATAGTACTAATAAGGAGAAGGCATCTAACGGTGCTAGTAA  
 CTCTAATATAGTGAGTGTTCCTCCACTGGTGCAGCACGTGTTTAAAGAATGCAATTCAGATTAA  
 CAGTCACTGAAAGATCTGGACTTGGAACTCTCTGGGACGAAGAAGTTCTCCATTTACCAA  
 GATGTCGAGTTGCTCTCGCCACCATGTTACGAGCTCTCTATAAATAATGGAATCAAAAATAA  
 ACTTTATTCAACAATGAGTACTCCTGTTAGATCAGAGGATGATTTTGTGGGCGGCAGCGATG  
 AAGATATTGGGAACATGAGAGCCAAGGGCTCGAACCTGGTCTAACGTACAGGAAGTAACG  
 ATCACACAAAATAAATTAACGATACCACCAACCGCACATCACTACCAGCCTGCTTCTCTTC  
 GCAAAGATCCCTTACCACAGTACAGTACCACCCTGGAAAGTGTGTTAGTGTCCAGGGTA  
 GTGTACCTTTTCTGTTGACATGTGTTGACACCACATAGCACAAAGAGATATCAGAATACAAAAC  
 TTTTCCGATTTTCTAGATTCCAATAGAATAACCCAGTAG

>YLL008W 0.73 Cold

ATGGTGGTAGGAACTAAAAAATACTCTAATTTGGACTTTGTCCCTACAATCAGTGACAGTGA  
 AGACGATGTTCCAATCTAGATTCTTCTGATGACGAAAAAGTCGAGGCTAAGAAGACTACGA  
 AGAAGCGGAAGGGTAAGAATAACAAGAAAAAGGTTAGTGAGGGGGATAACCTCGATGAGGAT  
 GTTCATGAGGACTTGGACGCGGGGTTAAGTTTGATTTGGACGCCGATGATACCACTTCGAA  
 CTTCCAAGGCTGGAACCTTCTAGCAGAGGGCGAGTCCAATAAGGACGATGCCGAAGCTTTTG  
 TGAAGAAGGACGTTGACTTGGATAAGATTATTAGAAGAAAAGGTGGGCTGGTGAATAATGGCC

CATATTGATAGTAAACAAGAAGAAGAAACCGAGAAAGAAAAAGTAGAAAAAGAAAACGATAG  
 CGACGATGAGGAATTAGCAATGGACGGGTTCTGGTATGGGAGCTCCCATGAACAATGGAGACG  
 AAAATCAGTCAGAAGAAGAAGAAGAGGAGGAAAAGGAAGAGGAAGAGGAGGAAGAGGAG  
 GAACAAGAAGAGATGACGTTAGAAAAAGGCGCAAAAGATGACGAAATAGATGAAGAAGACGA  
 TTCTGAAGAGGCAAAGCCGATTTCTATGCGCCTGAAACTGAGGGAGATGAAGCTAAAAAGC  
 AAATGTACGAAAAATTTCAACAGTTTGTCTTTATCTCGTCCGGTCTTAAGGGCCTTGCAAGT  
 TTGGGTTACGTCAAGCCTTCCCCTATTCAAAGCGCCACAATCCCCATTGCCTTATTGGGTAA  
 AGACATCATTGCCGGTGCTGTGACTGGTTCCGGTAAGACTGCTGCGTTTATGATTCCATAA  
 TCGAGCGTTTGTGTATAAACCAGCCAAAATCGCTTCCACCAGAGTTATTGTTCTATTGCC  
 ACTCGTGAGTTAGCTATCCAAGTCGCTGACGTTGGTAAACAATTCACAGTTTCGTCTCCGG  
 TATAACCTTTGGTCTGGCCGTTGGTGGTTTGAACCTGAGACAACAAGAACAATGTTGAAAT  
 CTCGTCCGGACATCGTCATTGCTACCCCAGGTAGATTTCATTGATCATATCAGGAACTCAGCA  
 AGTTTTAATGTGGACTCAGTAGAGATTCTGGTTATGGATGAAGCCGATAGAATGTTAGAAGA  
 AGGTTTTCAAGATGAACTGAACGAAATTATGGGCCTATTACCAAGCAATAGACAGAACC  
 TATGTTTTCTGCTACAATGAACTCCAAAATTTAAAAGTTTAGTTAGTCTTTCTCTAAAAA  
 ACCAATAAGGATTATGATTGATCCTCCAAAGAAAGCTGCTACTAAGTTGACACAAGAATT  
 CGTTCGTATTCGTA AAAAGAGACCATTGGAAGCCTGCCTTGTTATTTAATTTGATTAGGAA  
 ATTGGATC  
 CAACGGGTCAAAGAGGATTGTCGTTTTTGTGGCTAGAAAAGAACTGCTCATAGGTTAAGG  
 ATTATCATGGGTCTTTTAGGTATGAGTGTGGGTGAATTACACGGTCTTTAACCCAAGAACA  
 GCGTTTAGATTCCGTTAATAAAATTCAAAAATTTGGAAGTTCCTGTACTTATCTGTACGG  
 ATT  
 TGGCCTCCAGAGGTTGATATCCCCAAGATTGAGGTTGTTATCAACTACGATATGCCCAAG  
 AGTTATGAGATCTACCTGCATAGAGTTGGTCGTACCGCCAGAGCTGGTAGGGAAGGTCGTT  
 CCGTCACCTTCGTCCGGTGAATCATCTCAAGATAGAAGTATTGTACGTGCTGCTATAAAGAG  
 TG  
 TAGAAGAAAATAAGTCCCTAACTCAAGGTAAAGCACTTGGTAGAAACGTAGACTGGGTCAA  
 ATCGAAGAAAACAACAACCTTGTGAATCCATGAACGATACGATTGAAGATATTCTGGTGGA  
 AGAAAAGGAGGAGAAGGAAATATTAAGGGCTGAAATGCAATTAAGAAAAGGTGAAAATATGT  
 TGAAGCATAAAAAGGAAATCCAGGCAAGACCAAGAAGGACATGGTTCCAAAGCGAATCAGAT  
 AAGAAAAATTCCAAAGTATTAGGTGCTTTATCAAGGAACAAGAAAGTCACTAACAGCAAAA  
 GAGAAAGCGTGAAGAAGCTAAGGCAGATGGCAATGGTGCACGTTCTTATAGAAAAACCA  
 AAA  
 CCGACCGTATTGCAGATCAAGAAAGAACTTTTAAAAGCAGAAGAGTACAAATTCAAATAAG  
 AAGAAGGGCTTCAAAGCCGTAGGTAA

>YJR131W 0.79 Cold

ATGAAGAACTCTGTCCGGTATTCAATTGCAACCATTGTTGCTATCATAGCAGCTATATACTA  
 TGTGCCATGGTACGAACACTTTGAGAGAAAGTCACCGGGGCGGAGAAATGAGAGATCGGA  
 TTGAAAGCATGTTCTTGGAAATCGTGGAGAGACTATTCCAAGCATGGCTGGGGATACGATGTG  
 TATGGACCTATTGAGCACACTTCCATAATATGCCTCGTGGCAACCAGCCGTTAGGCTGGAT  
 TATCGTAGATTTCAGTGGATACCTTGATGTTAATGTATAACTCCTCCACACTATACAAAAGTG  
 AGTTCGAGGCAGAAATTCAGAGATCGGAGCATTTGGATAAACGATGTTTTGGATTTTGATATT  
 GATGCCGAAGTGAATGTTTTTTGAACTACTATTAGAATGCTAGGTGGTTTTATTATCCGCATA  
 TCATCTATCTGATGTTTTAGAAGTAGGTAATAAGACTGTCTACTTGAACAAAGCAATAGATT  
 TGGGGGATAGGCTTGCTTTGGCGTCTTATCCACTCAGACCAGGAAATTCATACTCAAGTATA  
 AACCTTCATAGTGGCCAAGCGGTTAAGAACCATGCAGATGGGGGGCATCTTCTACCGCAGA  
 ATTCACTACGCTACAAATGGAATTCAAATATCTGGCGTATTGACAGGAAATCGTACTTATT  
 GGGAGCTGGTGGAGCGTGTTTACGAGCCATTATACAAAAATAACGATCTTCTAAATACCTAC  
 GATGGATTGGTTCCAATTTATACATTTCCAGATACTGGGAAGTTTGGTGCCTTCGACTATCCG  
 GTTCGGATCAAGAGGTGATTCTTTTTATGAGTATTTACTAAAACAATATTTATTGACGCACG  
 AAACACTTTTATTATGATCTGTACAGAAAATCCATGGAAGGTATGAAAAGCATTATATTAGCA  
 CAATCCAAACCTCTTCTCTGTGGTACATTGGGGAAAGAGAACAAGGTCTACATGGACAAC  
 TTCTCCTAAGATGGACCACCTCGTGTGCTTTATGGGGGGATTGTTAGCATCAGGCTCTACTG  
 AGGGCCTTTCTATTCATGAAGCCCGAAGACGTCCTGTTTTCTCTCTTTCCCTTGAAAGAAAA  
 AGTGAAGTGGGATTTGGCTAAAGGGATAACTGACACATGTTATCAAATGTACAAGCAGTCTTC  
 CTCGGGGCTTGCGCCTGAAATCGTTGTCTTCAATGATGGAAACATAAAAACAGGATGGTTGGT  
 GCGGTCTGTGGGTGATTTTTTTGTAAACCACTCGATAGGCACAACCTACAAAGACCA  
 GAAACGGTGGAAATCGATTATGTTTCATGTATCATTATCTCATGATCACAAATATCGTGAATG  
 GGGGGCGGAAATCGCAACTAGCTTCTTTGAAAATACCTGTGTTGATTGTAATGACCCAAAAT  
 TAAGGCGGTTACCAGTTAAGTGATTGTATCACGTTACCTACAAAGAAATCTAACAATATG

GAAAGTTTCTGGTTGGCAGAGACTTTAAAGTATTTATATATATTGTTTTTAGACGAGTTTGA  
 TTTGACCAAAGTTGTTTTCAACACAGAAGCTCATCCTTTTCCAGTATTAGACGAAGAAATAT  
 TAAAATCGCAGTCTCTGACCACAGGTTGGTCGTTGTAG

>YNL157W 0.82 Cold

ATGTCGAATGAAAACCTTATCTCCCAATAGTAGTAACCCAGATTTAACTAACTGAATAACGG  
 CGAAAGCGGAACCTATTGATACCAGCAAATTTCTCGCCCAACGAAATGAAGCTATACAAAATGT  
 ACGGAAAGCTGCCATCAAAGAAAGATATTTTTAAGCATAACCATGCAGAAAAGAAAATATTTT  
 GACAGTGGTGATTACGCTTTGCAGAAAGCTGGCATTCAAAAACAATGATCCAATAAACTATGG  
 AAAGAATAACCTGCCATTAACAAATCCCAGCAAACCTACGAGAAGATATAATAAAAAGAAGGA  
 TAAGCACTTGTCCGTCAACTGCCCTCAACCGCTGGTGTAGTAGATAATGCGACGTTGATACAA  
 AAGGAGGGAAGTATATCGAGTGGACCACCATCGTCTAATAACGGTACTATTGGAGGTGGTAG  
 TACAAGTTCAACGCCAGTGGGGAACACAGCTCTTCGTCGTCCAGTTTGTATACTGAATCAC  
 CCATTAGATAA

>YOL159C 0.79 Cold

ATGGTTCCTTATTGTTGTTATTTTTGCATTTTTTCTCAATTGTACTCATTATGCTCCGCATA  
 TGTGATATCACCAGCGTTACCAAGTATTTTTCAACTTGCCAACATAATGACAAAACAATC  
 AAATATGCTGGCTATTCCAAGCATCTTACTATGATATTTATTTCTGATAAAAAGTGGTAGAACA  
 CTTAGAACGGGACGGTTTTGAACCGGCGATCAGCAATCTTTGATTTATAGGGATACCTTAGT  
 TGAGTTGGAGGCTATTACAGATTCTTATGAGTACAGTAACCTAGATCTATCGACTTATAACG  
 GACCTGAGCCATATAATTCTGAGACTGATTATTTGTACAGATATAATGGATTTGGTAATGCGT  
 GTATATGATGAAGAAGGACATTATGTTTCATCCAGTTGCGAATAACTCAACAAATGCTTGCGC  
 TCATCCAACCTCCTCTACGTTAAACAATCTATTGATAAGTAATTATTCTGACGGAAGAAATT  
 ATAAAGAGTCTTCTATATAA

>YGL256W 0.79 Cold

ATGCTTTCGTTACTGGGTTTTACATTCCACCAATCTCTTTCTTTGGTGAAGGTGCTTTAGA  
 AGAAACCGCTGATTACATCAAAAACAAGGATTACAAAAGGCTTTGATCGTTACTGATCCTG  
 GTATTGCAGCTATTGGTCTCTCCGGTAGAGTCCAAAAGATGTTGGAAGAACGTGACTTAAAC  
 GTTGCTATCTATGACAAAACCTCAACCAAACCCAAATATTGCCAATGTCACAGCTGGTTTTGAA  
 GGTTTTTGAAGGAACAAAACCTCTGAAATTGTTGTTTTCCATTGGTGGTGGTTCTGCTCACGACA  
 ATGCTAAGGCCATTGCTTTATTGGCTACTAACGGTGGGGAAATCGGAGACTATGAAGGTGTC  
 AATCAATCTAAGAAGGCTGCTTTACCCTATTGTCATCAACACTACTGCTGGTACTGCTTC  
 CGAAATGACCAGATTCACTATTATCTCTAATGAAGAAAAGAAAATCAAGATGGCTATCATTG  
 ACAACAACGTCACTCCAGCTGTTGCTGTCAACGATCCATCTACCATGTTTGGTTTTGCCACCT  
 GCTTTGACTGCTGCTACTGGTCTAGATGCTTTGACTCACTGTATCGAAGCTTATGTTTCCAC  
 CGCCTCTAACCCAATCACCGATGCCTGTGCTTTGAAGGGTATTGATTTGATCAATGAAAGCT  
 TAGTCGCTGCATACAAAGACGGTAAAGACAAGAAGGCCAGAAGTACATGTTTACGCTGAA  
 TACTTGGCAGGTATGGCTTTCAACAATGCTTCTCTAGGTTATGTTTCATGCCCTTGCTCATCA  
 ACTTGGTGGTTTTCTACCCTTGCCTCATGGTGTGTTGTAACGCTGTCTTGTGCTCATGTTT  
 AAGAGGCCAACATGCAATGTCCAAAGGCCAAGAAGAGATTAGGTGAAATGCTTTGCAATTC  
 GGTGCTTCTCAAGAAGATCCAGAAGAAACCATCAAGGCTTGCACGTTTAAACAGAACCAT  
 GAACATTCCAAGAACTTGAAGAATTAGGTGTTAAAACCGAAGATTTGAAATTTTGGCTG  
 AACACGCCATGCATGATGCCTGCCATTTGACTAACCAGTTCAATTCACCAAAGAACAAGTG  
 GTTGCCATTATCAAGAAAGCCTATGAATATTA

>YLL006W 0.76 Cold

ATGACTGATAGTGAGAATGAATCCACCGAAACGGATTTCGTTAATGACGTTTGACGATTATAT  
 AAGCAAAGAGCTACCTGAACATTTACAGAGACTAATCATGGAGAATTTGAAGGGTTCTACTA  
 CTAATGACTTAAAGCAAACCTTCAAACAACCTCAGAGTTAATGTCAGTAAAAACGGGAGCTTC  
 AAAGGTCTCGATGATGCAATTCAGCTTTGCAAATGCAAAGCGTGTTGCATCCTTCTTCGTT  
 AGGATCGTTAGCAACGTCCTCCAAATTTCTGGATGGTTCGTTTGCCTCAAGGGTTTTTTGTAG  
 GACAGCTAAGCATAGTGTGTTGTTTCATCTTTTTCTAAAGTTCTTTATATTCAGTGATGAG  
 CCATCTAAAAGTAAGAATCCGAAACCTGCAGCCTCCCGTCAAGATCAAAAATTTAAAGAATA  
 TCCCTTTATATCTCGCGAATTCCTGACTTCTCTTGTAGGAAGGGTGCTAAACAACACTACG  
 AGCTCAATGAAGAGGCAGAAAATGAACATCTTCAAGAACTAGCTCTTATTTAGAGAAAACC

TATTATAATGTCGACGTGCACCCCTGCAGAGTCATTGGACTGGTTCAACGTTTTAGTTGCCCA  
AATAATACAGCAATTCGCGAGTGAGGCTTGGCACAGGGACAATATCCTTCATTCCTTGAATG  
ATTTTATTGGAAGAAAATCACCCGATCTGCCTGAATATTTGGATACCATAAAAATAACTGAA  
CTGGATACAGGTGATGATTTCCCATTTTTCTCGAATTGCAGAATACAATATTCGCCAAATTC  
AGGAAATAAAAAGCTAGAGGCTAAAATTGATATAGATTTAAATGACCCTTAACCTTTAGGAG  
TAGAAACAAAACCTATTACTTAACTATCCAAAGCCTGGTATTGCCGCACTCCCCATAAATCTA  
GTAGTGTCAATTGTGAGGTTTCAGGCGTGTGTGACCGTATCTTTAACTAATGCAGAGGAGTT  
TGCTTCTACTTCGAACGGTAGCAGTAGTAAAACGGTATGGAGGGCAATTCAGGATACTTTT  
TGATGTTTTCTTTTTCTCCTGAATATAGAATGGAATTTGAAATCAAGTCGCTAATTGGCTCA  
CGGCTAAACTTGAAAATATTCCCAAGATCGGCAGTGTCAATTGAATACCAATAAAAAAATG  
GTTCTGTTGAACGATGCGTTGAACCAAGATTCCAATTTGTCAGGTTACCAAGTATGTGGCCAC  
GTAGTAAAAATACGAGAGAAGAAAAGCCTACAGAGTTATAA

>YKR056W 0.78 Cold

ATGTACGAACAGTTTGAATTTTCTTTTTTTTTCTTCGAAAATTTCAGACAATAAGGTTAAATA  
TAAAGCTCATCTCATCTCATCGATAAAACGCTGGAGTATTATCACATGCATGCGTTGCTTTT  
GGACCGTACAGAAGTCTATATTTAAAGCTAGGTTTTTTCGCTTGCAGAAACTTTGTCAAGAAG  
CATAATTATAAACTAATCAGCACCATGACTGGAAGTACTGAAATGGTACCACCAACAATGAA  
ACATACCGTTGACAACAAAAGGCTTTTCGTCTCCTTTGACAGATTCTGGTAACCGCCGGACTA  
AGAAGCCAAAGTTGAGAAAAGTACAAGGCCAAAAGGTTGAAACAACCTCTCCGATGGGTGTC  
CTAGAATTTGAAGTGAACGATTTGTTAAAATCTCAAAATTTGTCCAGGGAGCAGGTTCTGAA  
CGATGTTACTTCAATTCTAAAATGATAAGTCTCAACAGATGGACCTATCGTCTTACAATATC  
ACCGAGAGGTAAAAAATGTCAAGGTCTTAGAAATTACTTCCAATGGCAACGGGTTGGCTTTG  
ATCGATAATCCTGTTGAAACAGAAAAGAAGCAAGTTGTTATCATACCGTTTGGCCTGCCCGG  
TGATGTAGTTAATATCAAAGTCTTTAAGACCCACCCTTACTATGTCGAGAGTGATTTATTAG  
ACGTAGTGGAAAAATCTCCAATGAGAAGAGATGATTTAATTAGGGATAAATATTTCCGGAAA  
TCTTCAGGAAGTCAATTAGAGTCTTAACTTACGATGACCAACTAGAATTGAAAAGAAAAAC  
AATTATGAATGCCACAAGTCTTTCGCACCAAGGTTAGTTGCTGAAAAACTTTTACCCCAT  
TTGACACCACCGTAGCTTCCCTTTTACAATTTGGCTACAGGACCAAAAATTACGCCTCATTTT  
GATATGCCAAAAAGAAAACAAAAGGAACATACAGTAAGGCCCTCTTTAGGATTTGGTCAAAA  
GGGTAGACCTCAATGGAGAAAAGATACTTTGGATATCGGCGGACATGGTTCGATATTAGATA  
TCGATGAATGTGTGCTTGAACCTGAAGTTCTCAACAAAGGATTGACTAATGAAAGAAGAAAG  
TTTGAGCAAGAGTTTAAAAACTACAAAAAGGCGCGACTATTTTACTGAGAGAGAATACCAC  
TATTTTAGACCTTCCAACCAACTTTAGAACAGTTAACCGAAGAAGCCTCTAGGGATGAAA  
ATGGTGATATAAGTTATGTGCAAGTCAAGACAAAAGAACAATGTCAGGCTGGCTAAAACCT  
TGCGTTACCAATCCTAGACAAATTTGTCACTGAATATGTTGATGGATATACTTTTAAATTTTAG  
TGCGGGTGAGTTTTTTCAAAAATAAATACTCTATCCTGCCAATAGTGACCAAGTATGTCCGTG  
ATAACTTGCAAGCTCCCGCTAAAGGTGATGATAATAAAACAAAGTTTCTAGTAGATGCTTAT  
TGTGGATCAGGCTTTTTCAGTATATGCAGCTCCAAGGGCGTAGATAAAGTGATTGGTGTAGA  
AATTTCCGCTGACAGTGTCTCTTTTGAGAAAAAATGCAAAGGCAAAATGGTGTGAAAACCT  
GTAGATTCATCGTTGAAAGGCTGAGAACTCTTTGAGTCTATTGATACTCCAAGTGAAAAC  
ACTTCCGTTATCTTGGATCCACCACGCAAGGGCTGTGACGAATTATTCCATAAAGCAATTAGC  
CGCATATAATCCAGCCAAGATTATTTACATATCGTGTAATGTCCATTCCCAGGCACGTGATG  
TCGAGTACTTCTCAAAGAAACAGAAAACGGTTCCGCCACCAGATTGAAAGCATAAGAGGA  
TTTGATTTCTTTCCACAAACGCACCACGTTGAGAGTGTGTGTATAATGAAGAGAATCTAA

>YBL019W 0.8 Cold

ATGTCATCAAGCGAAAACACGTTACTGGATGGAAAGTCAGAGAACACAATACGATTTTTAAC  
TTTCAATGTCAATGGTATAAGAACCCTTTTTTCAATTATCAACCATTTTCTCAAATGAATCAAT  
CCCTTAGATCTGTTTTGCACTTTTTTCGAGCAGACATAATAACATTCGAAGAGCTCAAGACG  
GAAAAATTGTCTATCTCTAAGTGGGGGAGAGTTGATGGTTTTTATTCTTTTATTCTATCCC  
TCAAACCAGAAAGGATATTCTGGCGTTGGCTGCTGGATTAGAATTCGGAAAAGAACCACC  
CACTATACCATGCATTACAAGTCGTTAAGGCAGAAGAAGGTATAACGGGTTACTTGACAATA  
AAAAATGGTAAGCATTCAAGCAATCTCCTATAGAAACGACGTAAATCAAGGAATTGGTGGTTA  
CGATTTCTTTAGATCCCGATTTAGATGAGAAAAGTGCAGTGAAGTGAATTCAGAAAGGCAGAT  
GTGTTATGGTTGAACTGGCATGTGGAATAGTTATTATCAGTGTATATTGTCCCACAAATTCG  
AACTCATCGGAGGAGGTTGAGATGTTTAGATTAAGGTTCTTGAAGTTTTATTAAAGAAGAGT

TCGGAATTTGGACAAAATTGGGAAGAAGATTGTGCTAATGGGCGACGTAAATGTTTGCCGGG  
 ATCTTATAGACAGTGCCGATACATTAGAACAATTCTCAATCCAATAACAGATCCCATGGGT  
 GGAACAAAGTTAGAAGCACAATATAGGGATAAAGCAATCCAATTTATTATCAATCCGGACAC  
 GCCACATCGGAGGATATTTAATCAAATATTGGCTGATTCACTTTTACCAGACGCGAGTAAAA  
 GGGGGATACTGATAGACACTACGAGGCTAATTCAAACAAGAAATCGACTTAAAATGTATACA  
 GTCTGGAATATGTTAAAAAATTTAAGACCTTCGAATTATGGCTCACGGATAGATTTTATCCT  
 AGTGTCTTTAAAGCTTGAACGATGCATAAAAAGCAGCTGACATTCTTCCGGATATATTGGGCT  
 CTGACCATTGTCTGTGTATTCTGATTTAGATATACTGGACGACAGAATTGAACCTGGTACG  
 ACACAAGTTCCCATACCAAAAATTCGAAGCAAGGTACAAATATAATTTAAGAAACCATAATGT  
 TTTAGAGATGTTTGCCAAAAAGGATACGAATAAAGAATCTAATAAACAAAAATATTGTGTAT  
 CAAAAGTCATGAATACCAAAAAAACAGCAACATCAAAAACAAATCGCTCGACTCATTTTTTC  
 CAGAAGGTAAATGGAGAAAAAGATGACAGGATTAAGAATCCTCTGAAATTCACAGCAAGC  
 TAAAAAAGAATCTCCACGCCAAAGTTGAATTTCAAGGATGTCTTTGGAAAGCCTCCCTGT  
 GCAGGCATGGGGAGGAATCCATGCTGAAAACATCGAAAACCTCGGCCAATCCAGGTAGAAAG  
 TTCTGGATTTGCAAGAGATCTCGGGGTGATTCAAATAATACAGAATCATCTTGTGGGTTTT  
 TCAGTGGGTTTAA

>YDR358W 0.81 Cold

ATGCCACAAAGAATTGAGCTTACCTCCGAACCAGTCAGAAAACCGCGGCTACTGAGAGCTC  
 ACTACTCAGAAAAGATACAAAGAGCGTGTAGATCCACATTGCCTGAACCAGATTTGGGCTTGA  
 ACTTAGATGTAGCTGACTATATCAACTCAAAGCAAGGAGCAACCCCTAGAGAGGCTGTGTTA  
 GCAATTGAAAAATTGGTCAATAATGGGGACACGCAAGCAGCTGTTTTTGCACTTTTACTACT  
 AGACGTGCTGGTAAAAAATTGTGGTTACTCTATACATTTGCAAATCTCCAGGAAGGAATTCT  
 TAAATGATCTAGTGAAAAGATTTCCAGAGCAACCACCATTGAGATATTCCAAGGTGCAACAA  
 ATGATTTCTGAAAGCCATCGAGGAATGGTACCAACCATCTGCAAACATGCCAGCTACAAAGA  
 TGATCTTCAATATATCAACGACATGCATAAAATTACTGAAATACAAGGGTTATACTTTCCCAA  
 AAGTTGGGAGTGAAAACCTTGGCGGTGTTGAGACCGAATGACCAACTGAGGACACCTAGTGAG  
 CTACAGGAAGAACAGGAAAGAGCTCAAGCTGCAAACCTAGAAGAGCTGCTAAGAAGCGGCAA  
 GCCCGATGATTTGAAAGAAGCTAATAAACTGATGAAAATTTATGGCGGGATTTAAGGATGACA  
 CTAAAGTAGCAGTCAAACAAGCAATTAACAATGAACTAAATAAACTCAAAGAAAAGCTGAT  
 TTATTTCAACGAAATGTTGACTTCAGCCGATGAGCCTGATCTTGAAAATGAAGCTATTCAAGA  
 ATTTGTATGGCGACTTAAATCAGCGCAGCCGAAATTCAAAAGCTTATTGAGGAAGAACGCG  
 ATGACGATGCGCTTGTAGTAATCTATCAAAATTTAACGATCTAGTGATCCAATTGTTAAAA  
 AGGTACAAGTCAATAAAAAGGTATGAAGGAAGAAGAACTAAATGTCCCCGATACGAATGAACC  
 GGCAAAGAGCTTAATTTGATAGATTTTGATGACGATACAAACAGCAAACACTCCATCTGTGA  
 CATCTCCAAGCAAATCTTTGCAACCTTTTGACGATCTTTTAGGGGATTTTAATAAGGTAAGT  
 TTATCATCCCCAAAGTCTCCTCAAGAAAACGACACTGTTGTTGATATACTTGGTGACGCTCA  
 CTCAAAGTCATCTGGTATAGATTTATTAGATTTTGTATTGCGAACCTGGAGAAAGTAAAACCG  
 CTCTGTCCGCATATTCTAACTCGATTGTTCTACCTAATGGTTTACTAAATAGTTCAAGTAAC  
 TCCAAGGAAATCACAGCTCAATCGCAAAGACATATACTTAACCAATCGGATCACTTACGCAT  
 TGATTACGAATTAACCTCGTGAGTCGATGACAAAACACTACGATTAGTTATCTTCTATTCAAACA  
 TAAGCAGTGATCCAATAACTAATTTTGCACTTTTAGTGGCATCACCTAAAGGCACGACATTG  
 TCTCTGCAACCGCAATCGGGCAATATGCTCCAAAGTAACTCCAGAGATGGTATCAAACAGAT  
 TGCTTCCGTAGAGGGTATATCTGTTAATTTAGGTAAGCCATAAAAATTGAAATGGAAGGCTA  
 ATTACTGCACCAAGGGTGATTCGAAGGAAGAATCGGGCACGACCAGTTTGCCACAATATAA

>YBR299W 0.74 Cold

ATGACTATTTCTGATCATCCAGAAACAGAACCAAAGTGGTGGAAAGAGGCCACAATCTATCA  
 AATTTACCCAGCAAGTTTTAAAGACTCCAATAACGATGGCTGGGGTGATTTAAAAGGTATCA  
 CTTCCAAGTTGCAGTATATTAAGATCTTGGCGTTGATGCTATTTGGGTTTGTCCGTTTTAT  
 GACTCTCCTCAACAAGATATGGGGTATGATATATCTAACTACGAAAAGGTCTGGCCCACATA  
 CGGTACCAACGAGGACTGTTTTGAGCTAATTGACAAGACTCATAAGCTGGGTATGAAATTC  
 TCACCGATTTGGTTATCAACCACTGTTCTACAGAACACGAATGGTTCAAAGAGAGCAGATCC  
 TCGAAGACCAATCCGAAGCGTGACTGGTTCTTCTGGAGACCTCCTAAAGGTTATGACGCCGA  
 AGGCAAGCCAATCCTCCAAACAATTGGAAATCTTTCTTTGGTGGTTCAGCTTGGACTTTTG  
 ATGAAACTACAAATGAATTTTACCTCCGTTTGTTCGAGTCGTCAAGTTGACTTGAATTTGG  
 GAGAATGAAGACTGCAGAAGGGCAATCTTTGAAAGTGCTGTTGGATTTTGGCTGGACCATGG



TGTAGATGGTTTTAGAAATCGATACCGCTGGTTTTGTATTTCGAAACGTCTCTGGTTTTACCAGATT  
 CCCCAATTTTTGACAAAACCTCGAAATTACAACATCCAAATTTGGGGGTCTCACAATGGTCCT  
 AGGATTCATGAATATCATCAAGAACTACACAGATTTATGAAAAACAGGGTGAAGATGGTAG  
 AGAAATAATGACAGTCGGTGAAGTTGCCCATGGAAGTGATAATGCTTTATACACCAGTGCAG  
 CTAGATACGAAGTCAGCGAAGTTTTCTCCTCACGCACGTTGAACTTGGTACCTCGCCATTT  
 TTCCGTTATAACATAGTGCCCTTCACCTTGAAACAATGGAAAGAAGCCATTGCATCGAACTT  
 TTTGTTTCAATTAACGGTACTGATAGTTGGGCTACCACCTACATCGAGAATCACGATCAAGCCC  
 GGTCAATTACGAGATTTGCTGACGATTTCGCCAAAGTACCGTAAAATATCTGGTAAGCTGTTA  
 ACATTGCTAGAATGTTTCATTGACAGGTACGTTGTATGTCTATCAAGGTCAGGAGATAGGCCA  
 GATCAATTTCAAGGAATGGCCTATTGAAAAGTATGAGGACGTTGATGTGAAAAACAACACTACG  
 AGATTATCAAAAAAAGTTTTGGTAAAAACTCGAAGGAAATGAAGGATTTTTTTAAAGGAATC  
 GCCCTACTTTCTAGAGATCATTCGAGAACTCCCATGCCATGGACGAAAAGATAAGCCCAATGC  
 TGGATTTACTGGCCAGATGTTAAACCTTGGTTTTTTCTTGAATGAATCTTTTGAGCAAGGAA  
 TCAATGTTGAGCAGGAATCCAGAGATGATGACTCAGTTCTCAATTTTTGGAAAAGGGCCTTG  
 CAAGCCAGAAAAGAAATATAAGGAACCTTATGATTTATGGTTACGATTTCCAATTCATTGATTT  
 AGACAGTGACCAGATCTTTAGCTTCACTAAAGAGTACGAAGACAAGACGCTGTTTGCTGCTT  
 TGAATTTCAAGTGGCGAAGAAATGAAATTCAGCCTCCCAAGAGAAGGTGCTTCTTTATCTTTT  
 ATTCTTGGAAATTATGATGATACTGACGTTTCTCCAGAGTTTTGAAACCATGGGAAGGTAG  
 AATCTACCTCGTCAAATAA

>YJL095W 0.75 Cold

ATGCCCTTTTTGAGGAAAATAGCGGGACAGCACATACACATTCTAGGTCTGATTTCGAACTC  
 ATCTGTGAAATTCGGCCATCAGCCGACTAGTTCGGTAGCATCAACCAAAAAGTTCAAGCAAAA  
 GCCCTCGTGCAACATCTCGCAAAAGCATTATGATGATATTAGAAGCCAATTTCCCAACCTA  
 ACCCCCAACTCTACCTCTTCTCAGTTTTTACGAAAGCACGCCAGTTATCGAACAATCCTTTAA  
 TTGGACGACAGATGACCACATCTCAGCTGGAACGCTTGGAAAACCCAACGAGCTTTACAAACA  
 GTTCTTATAAAAAATGACAATGGACCTAGTAGCCTCTCTGATTCGAGGAAAATCCTCCGGTGGC  
 AATAGCGTAAATAGTTTTGTCTTTGACAAGCTAATTCTATCGTGGGATCCTACAGACCTGA  
 TGAATGGACAATGCATCGCGTCACCTCATGGTTTTAAATTTTCATGATTTTCCAGAATCCTGGA  
 TATTGTTTTTCAAAAAGCATCAATTGTTTGGTCCACAGATTTATAAAGTTGCTTGCATATGAT  
 AATTTGCTGTTTATGAAAAGTATTTGCCGCAGACTAAAACCTGCTTCATATACCAGGTTTCA  
 GCAGTTATTGAAAAAACAATGACCAAGAACGTAACAAATAGCCATATTCGTCAGAAGAGCG  
 CTAGCAAACCTTAAAAGTTCCAGGTCTTCCAGCGAATCGATCAAATCAAAATTAATAAATAGT  
 AAATCGCAAGAGGATATTTCAAATTTCTAGATCAACGTCAGAATCTGCATTGAGCCCAACAAA  
 ATCGGGCCCTTCCAAGACCGATGAAAAGAATTTTTTACATTCTACTTCAACACACCAAAAAA  
 CAAAAGCGCAAGTTCACTATACAGAAGAAGTTTTATATCCCTAAGAGGCTCATCATCGAGC  
 AATGCTTCCCTCAGCAAAATCACCTTCAAACATCAAGTTAAGTATACCGGCTCGGCCGCACTC  
 AATTATTGAATCTAACAGTACACTTACCAAATCGGCGAGCCACCTGCATCTCCTTCGTATC  
 CTAGCATATTTAGAAGACATCACAAAAGTAGTTTCATCTGAGTCGTCATTATTAATTTCCCTT  
 TTTGGTAGTGGAATAGGCGAGGAAGCTCCAACAAAGCCTAATCCACAAGTTCATAGTCTGTG  
 TAGTGAAAATTTAGCTAAAGGAAAATCTAAACACTATGAAACTAATGTGTCTTACCTTTAA  
 ACAAATCTTCACTACCCACTTCGGATGATAAAGGTAATTTATGGAATAAATTCAAAAGAAAG  
 AGCCAAATAGGGGTTCCCTAGCCCAAATACGGTAGCTTATGTAACGTCCTCAAGAAACTCCATC  
 CTTAAAATCGAATTCGAGTACTGCTACCTTAACCGTACAAACGGCAGATGTAATATACCAT  
 CTCCATCTTCATCACCACCGCCAATACCCAAAACCTGCAAACAGAAGTTTGGAGGTCATCAGC  
 ACAGAAGATACACCTAAAATTTCTTCAACCACGGCGTCTTTTAAAGAAACGTATCCTGATTG  
 TATTAATCCAGACAAGACAGTTCCAGTGCCGGTAAATAATCAAAGTATAGTGTAAGAAGT  
 TTTTACTGGACCAAAAATTTTATCCTCTGAAGAAAACAGGGTTAAATGATAGTGAGAATAAA  
 TATATCTGGTTACCAAAGATAATGTTAGTTTTGTTCCGCTAAACTTAAAAAGTGTAGCAAA  
 ATTATCCAGTTTCAAAGAATCTGCTCTCACAAAATTGGGAATCAATCACAAAATGTCACCTT  
 TCCATATGACAGACTTTGATTGCGATATTGGTGCTGCAATTCAGATGATACTTTGGAATTT  
 TTGAAAAAAGCTTGTTTTTGAACTTCTGGAAAAATTTATATCAAAGACCAAATGAAGCT  
 TCAACAAAAACCGAAACCTGCTCCTCTCACCTCAGAAAACAATGTTCTTTAAAATCGGTGA  
 AAAGTAAGAGTTCAATGAGGTCCGGAACAAGCAGTCTGATAGCATCGACAGATGATGTTTCC  
 ATTGTCACCTTCGTCTTCTGACATAACATCATTTGATGAACATGCATCAGGAAGTGGGCGCAG  
 GTACCCCAAAACCCGAGTTATTACTATGACAGAGTTTCCAATACTAATCCAACCTGAAGAAT  
 TGAATTTATGGAATATTAAGAAGTTCTTTCTCATGAGGAAAATGCACCAAAAATGGTTTTT

AAAACAAGTCCAAAATTAGAACTCAACCTACCAGATAAAGGAAGTAAATTAATATTCCTAC  
 CCCATAACAGAAAATGAAAGCAAGAGTAGTTTTCAAGTGCTAAGAAAAGATGAGGGGACTG  
 AAATTGATTTCAATCATCGTAGGGAATCGCCTTATACAAAACCAGAACTGGCACCAAAAGA  
 GAAGCTCCCAAGCCTCCCGCAAATACTTCTCCTCAGAGGACCTTATCAACTTCTAAACAGAA  
 TAAACCGATCCGCCTAGTGAGGGCAAGTACAAAATTTTCGAGAAGCAAAAAGATCGAAACCAT  
 TGCCGCCACAATTATTATCATCTCCTATAGAAGCTAGCAGCTCGTCTCCTGATTGCTTACT  
 TCCTCATATACTCCTGCTTCGACTCATGTTTTGATACCGCAACCTTATAAGGGTGCAAACGA  
 TGTATGCGTAGGTTGAAAACAGACCAGGACTCGACGAGTACTTCCCCATCTTTGAAAATGA  
 AACAGAAAGTGAAATCGCTCAAAATCAACTGTATCGACTTCAAATTCATTTTCTATTCTCCT  
 TCACCATTGTTAAAAAGAGGTAACCTCAAAAAGAGTTGTTTCGTCGACATCTGCGGCCGATAT  
 ATTTGAAGAGAATGACATAACATTCGCGGATGCTCCGCCGATGTTTGACAGCGATGATAGTG  
 ATGACGATTCTAGTTCATCCGATGACATTATCTGGTCCAAGAAAAAACAGCTCCTGAGACT  
 AATAATGAAAACAAAAGGATGAGAAAAGCGATAACAGTTCACGCATTCGACGAAATATT  
 CTATGATTCTCAAACGCAGGACAAAATGGAGAGAAAGATGACCTTTAGACCATCTCCGGAGG  
 TCGTTTATCAAAAATTTAGAGAAAATCTTCCCAAGGGCTAACTTAGATAAGCCAATCACTGAA  
 GGAATAGCTTCACCAACATCTCCGAAATCCTTAGACAGCCTACTTTCACCAAAGAATGTGGC  
 TTCATCGAGAACTGAGCCAAGCACTCCTTCCCGTCCCGTCCCTCCTGATAGCTCATAAGAGT  
 TCATACAGGATGGACTTAACGGTAAAAATAAACCATTTGAATCAAGCTAAGACACCTAAAAGA  
 AAAAAACCATAAGAACCATTGCACATGAAGCTAGTTTAGCAAGAAAAAACTCTGTAAAACCT  
 AAAAAGACAGAACCCAAAATGTGGGGTACAAGAATGGTCAAGTGACCGAAAACCATATGG  
 TGTCAATTAATAAAGCCAAAAATTCGAAAAGGTGAGTATAAGGAATTCGCCCTGGATGAAGGGT  
 GAAATGATAGGGAAGGGATCTTTCGGTGCTGTTTATTTATGTTTTAAACGTTACTACAGGTGA  
 GATGATGGCCGTTAAGCAGGTTGAGGTCCCCAAGTATAGCTCACAAAATGAAGCCATTCTAA  
 GTACCGTGGAAGCATTAAAGATCTGAAGTGTCCACGTTAAAAGATTTAGATCATCTTAATATT  
 GTTCAATACTTAGGTTTTGAGAATAAAAAACAATTTTACAGTTTTGTTTTTAGAATATGTTGC  
 TGGTGGCTCCGTGGGATCCTTGATTAGAATGTATGGAAGATTCGATGAACCGTTGATCAAAC  
 ATTTAACAACACAAGTATTAATAAAGGATTGGCATACTACACTCGAAAAGGTATTCTCCACAGG  
 GATATGAAGGCAGACAACCTTACTTTTTGGATCAAGATGGTATCTGCAAAAATCAGTGACTTCGG  
 AATTTCAAGAAAATCAAAGGACATATACTCTAATTCGGATATGACCATGCGAGGAACAGTCT  
 TCTGGATGGCTCCTGAAATGGTTGATACAAAGCAAGGCTACAGTGCAAAAAGTTGATATATGG  
 TCTCTGGGATGCATCGTTCTGGAATGTTTGCTGGTAAGCGCCCGTGGTCCAACCTTAGAAGT  
 CGTCGCAGCCATGTTCAAAAATGGAAAGTCAAAATCGGCACCACCAATTCCTGAGGACACTT  
 TACCATTGATATCGCAAATCGGACGAAATTTTCTGGACGCATGCTTCGAGATAAATCCAGAG  
 AAAAGGCCAACCGCTAACGAGCTTCTTTCTCATCCTTTTAGTGAAGTAAATGAAACATTCAA  
 TTTCAAATCTACCAGACTCGCGAAGTTTTATAAAGTCAAATGATAAGTTAACTCTTCAAAT  
 TAAGGATAACCTCTCAGGAGAATAAACTGAATAG

>YOR003W 0.69 Cold

ATGAAATTCCTCTACCATCTTACCTATACTTTGGGCAAATGCTGTCTTTGTATGATCATCCC  
 TGATTTTCGACGGGATAGTTTCGTTTTATTGAGAATATTGATGGTACTCGCAGTGTAAGAGCAG  
 GAGAAGGTTTGGGACAGCATGATCCTGGAAATTTTTCACACTGAACATCAACATGTCGCTCAT  
 AAAACAGAGTTTCTTCCCTTATCGGTATGTATAGTCTTTAATGAAGATATTTCCCTCCAGCA  
 GATTCAATCGCATATGCAAGTGGTACAGAAGGATCATAGTACCTCAGTAGGTAAGCTTACAG  
 AAAATGACGCTTTTGGAGGGTAATTTCTTCTCAGTATCATCTAAATCTCAATTTGGAGGT  
 ATTGATAATTTTTTTGACATAAATGGTCTATTTTCGAGGTTATACTGGCTATTTCACTGATGA  
 AATCATTAATAAATCTCCCAGGACCCAATCATAAAGTTCGTAGAGCAAGAAACTACAGTAA  
 AAAATATCTAATTCGTCATTGCAGGAAGAAGCGCCTTGGGGTTTACATAGAGTTTTCGCACAGG  
 GAGAAACCAAAAATATGGACAAGATTTGGAATATTTATATGAAGATGCCGCCGAAAAGGTGT  
 CACATCATATGTACTCGACACAGGAATTGATACCGAGCACGAGGACTTTGAAGGGCGTGCTG  
 AGTGGGGAGCCGTTATACCAGCAAACGATGAAGCTTCTGATTTGAATGGTTCATGGAACCTCAC  
 TGTGCCGGGATATCGGATCGAAGCACTTTGGTGTAGCCAAAATAACAAAATAGTAGCTGT  
 CAAAGTTCTTCGTTCTAATGGGGAAGGGACGGTTTCAGATGTTATTAAGGTATAGAGTATG  
 TTACTAAGGAGCATATAGAATCGTTCGAAGAAAAAGAATAAAGAATTCAAAGGATCGACTGCC  
 AATCTTTCTTTGGGAAGTAGCAAATCGCTAGCTATGGAAATGGCTGTAATGCAGCTGTAGA  
 TAGCGGTGTCCATTTTGCTATTGCGGCAGGAAATGAGGATGAAGATGCTTGTCTCAGTTCAC  
 CAGCAGGAGCTGAAAAAGTATTACGGTCCGGTGCTTCGACATTTAGTGATGATAGAGCATTC  
 TTTTCGAACTGGGGCACATGTGTTGATGTGTTGCTCCCGGTATAAATATTTATGTCCACCTA

TATTGGTTCAAGGAATGCAACTTTAAGTTTATCAGGTACTTCCATGGCGTCCCCGCACGTTG  
 CTGGTATTTTAAAGTTACTTTTTATCATTACAGCCTGCACCAGACAGTGAATTTTTCAACGAC  
 GCTCCCTCACCTCAAGAATTGAAAGAAAAAGTCCTAAAAATTTAGTACACAGGGAGTACTGGG  
 TGATATCGGTGATGATACTCCTAACAAATTAATATATAATGGGGGAGGTAAGAAATTGGATG  
 GTTTTGGTAG

>YNR005C 0.78 Cold

ATGGTCTTTACCAGCTCAGAAAAGTTCTTCGTTGCTATCTTCTCTTAAAAATGACATGTTCCAT  
 GGTATCCATGAACTCTCTGGAACAAATTTCCTTAATAAAAAGGCGTTCCACCATTTTTTACAC  
 ATATATTGGTAAGCTTCCAGGAAGACAATTGGGTATTTGGATTATCGGCCGTATTGAGAATC  
 CTTTTCTTTATACAACGCATAGAATCTTTGGGATTTACCCTTCTAGATCTTAACACATCTGA  
 AATTTCCAACGCTATGGGGAGATCAAGGTCACCGTTGGGAATGCTCTCACTAGTGGCTTGT  
 CTATTAATGCGTCTAACTCACTTGGCGTGCTAACGGACATACTGTTCTTAGTTCTTTACTCA  
 CTACTCATTACCTTAGCAAAAAAATCTTGA

>YKL216W 0.81 Cold

ATGACAGCCAGTTTAACTACCAAGTTCTTGAACAATACCTATGAAAACCCATTTATGAATGC  
 ATCCGGTGTTCATTGCATGACTACACAAGAATTAGATGAATTAGCAAACCTTAAAGCTGGCG  
 CATTCAATACAAAGAGTGCTACAACCTTAGAAAGAGAAGGTAACCCTGAACCACGTTACATT  
 TCTGTCCCTCTAGGCAGTATCAACTCCATGGGTTTACCAAACGAAGGTATCGACTACTATTT  
 GTCCATATGATTTAAACCGTCAAAAAGAATTATCCTGATGCACCTGCTATTTTCTTCTCAGTTG  
 CTGGTATGAGCATTGATGAAAAATTTAAATTTGTTGAGGAAAATCCAAGATAGCGAATTTCAAC  
 GGTATTACCGAGTTAAACTTGTCTTGTCTTAATGTGCCTGGGAAACCACAAGTTGCTTATGA  
 CTTTGACTTGACAAAGGAAACCTTGGAAAAGTTTTTGCCTTTTTTCAAAAAACCTCTTGGTG  
 TCAAGTTGCCTCCTTATTTTGTATTTTGCCTTTTTGATATCATGGCAAAAATATTGAACGAG  
 TTCCCATTAGCTTATGTCAACTCTATCAATAGTATAGGAAATGGTCTTTTTCATTGATGTGGA  
 GAAGGAGAGTGTAGTAGTGAAGCCAAAGAATGGTTTTCGGGGTATTGGAGGTGAATATGTTA  
 AGCCAACCGCGCTCGCCAATGTTTCGTGCATTTTACACTCGTTTGAGACCTGAAATCAAAGTT  
 ATCGGTACAGGTGGAATTAAGTCCGGTAAGGATGCATTTGAACATCTTCTATGTGGTGCCTC  
 TATGCTACAGATTGGTACAGAATTACAAAAAGAGGGCGTCAAGATTTTTGAACGTATCGAAA  
 AAGAATTTAAAGACATAATGGAAGCTAAGGGTTATACATCCATAGATCAGTTCCGTGGGAAG  
 TTGAACAGCATTTAA

>YGR131W 0.73 Cold

ATGCTATCAGCTGCAGATAATTTAGTGCGCATCATAAATGCTGTTTTTCTTATTATATCCAT  
 AGGTCTAATCAGCGCCTGATAGGTACACAGACAAAGCATAGTTCTCGAGTGAACTTTTGTA  
 TGTTTGCCGCGTTTATGGTCTGGTTACGGATTCATTATATGGGTTTTTGGCTAATTTCTGG  
 ACATCATTAACATACCCAGCAATTTTGTCTGTTTTTGGATTTTTTAAATTTTCAATTTACGTT  
 TGTAGCAGCCACCGCTTTGGCTGTAGGTATAAGATGCCATTCGTGTAAAAACAAAACATATC  
 TGGAACAGAATAAGATCATAACAAGGCTCAAGCTCCAGATGTCATCAATCTCAGGCTGCTGTT  
 GCGTTTTTTTACTTTTTCTGTTTTCTATTCTCATCAAAGTACTGTGGCCACGATGGGTAT  
 GATGCAAAATGGTGGATTTGGCTCTAATACCGGATTACAGCAGAAGGAGGGCAAGAAGACAAA  
 TGGGCATACCTACAATTTCCCAGGTTTAA

>YIR031C 0.79 Cold

ATGGTGAAGATAAGCTTGGACAACACTGCTCTATACGCAGACATCGACACGACTCCTCAATT  
 TGAACCTTCCAAAACCTACTGTAGCTGATATTTTAAACAAAAGATGCCTTAGAGTTCATTGTTT  
 TGCTGCATAGAACTTTCAATTTCAACACGGAAACAGCTTTTAGCCAACAGAAGCAATTTACAA  
 TCAAAGTTAGACTCTGGTGAATACCGATTTGATTTCTTGCCGAAACCGAACAAATCAGGAA  
 CGATCCTACATGGCAAGGTGCTATCCCAGCCCCGTGGTTTGTATCAACAGATCCAGCGAGATTA  
 CTGGGCCACCATTGAGAAATATGTTAGTCAACGCTTTGAATGCTGAAGTAACGACATATATG  
 ACTGATTTTCGAGGACTCTTCATCTCCAACCTGGGAGAACATGATTTACGGACAAGTTAATCT  
 TTATGATGCCATTAGAAATCAAATCGATTTCAAGACACCAAGAAAGGAGTACAGGTTGAAGG  
 ATGACATTTCAAGACTGCCCACCTTTAATTTGTCAGACCTCGTGGCTGGCACATGGTGGAGAAG  
 CACCTTTACATAGATGATGAACCGATTAGTGCTTCCATCTTCGATTTTTGGTTTATATTTTAA  
 CCATAACGCTAAAGAGTTAGTTAAAATTTGGTAAAGGACCTTATTTTTTACTTACCAAAGATGG  
 AGCACCATATGGAGGTAAAACCTATGGAATGACATATTCTGTGTTGCACAAGATTTTATTTGGA

ATGCCCCGCGGTACCATTAGGGCCACTGTTCTGATTGAAACTTTGCCAGCGGCCTTCCAAAT  
 GGAGGAGATTATCTATCAAATAAGAGAACATTCAGCGGTTTGAAGTGTGGTTCGTTGGGACT  
 ACATATTTTCGACCATTAATAAACTGAGAACTTGCCTGAACACGTTTTGCCAAATAGGGAT  
 CTAGTGACTATGACTTCACCTTTTATGGATGCTTATGTGAAAAGATTGATCAATACATGTCA  
 CCGTAGAGGGGTCCATGCGATGGGTGGTATGGCTGCCCAAATCCCATAAAAGATGATCCAA  
 AGGCTAATGAAGCTGCAATGAACAAAGTTCGTAATGACAAAATTAGAGAAATGAAGAATGGG  
 CATGATGGGTTCATGGGTAGCACACCCAGCATTTGGCACCATTGTAATGAAGTTTTTCAGTAA  
 CATGGGTACAGCAAATCAAATATATTTTTGTCCCGGATGTACATGTTACATCATCTGATTTAT  
 TGAATACGAAGATTCAAGATGCTCAAGTCACTACTGAGGGAATCAGAGTAACTTGGATATT  
 GGCTACAATATATGGAGGCTTGGTTAAGGGGATCTGGTTGTGTCCCAATTAATCATTGAT  
 GGAAGATGCCGCTACTGCGGAAGTATCACGTTGTCAATTGTACCAGTGGGTAAACATGGTG  
 TTGTCTTAAGTGATACCGGTGACAAAGTAACTCCAGAATTGACCGCTAAGATATTAATGAA  
 GAGACTGCAAAAATTGGCTTCAGCAAGTCCGCTGGGTGAAAAGAACAAGTTGCCTTGGCAGC  
 CAAGTATTTTTTGCCTGAAGTCACTGGTAAAATCTTTAGCGACTTCTTGACCACCTTATTTGT  
 ATGATGAAATTATTAAGCCAAGTGCCAAACCAGTTGACTTAAGTAAATTATAG

>YGR112W 0.82 Cold

ATGTCCTACTAGGCGCCAGGTCCTACTTACCGTTGGTTTTCAATCGCTGCATCAATTCCGAC  
 TAAGAATGCTATTGGCAAATCCACGTACCTCTTAGCTTCAAGAAATCAACAGTACCGAGGCA  
 TCATAACGTCAACTGTAGACTGGAAACCAATCAAGACAGGTAAGAGCCCAAATGATGATTCT  
 CGAAGAGAAAGATCCTTTGGCAAGAAAATTGTTCTGGGTCTGATGTTTCGCGATGCCAATAAT  
 ATCCTTCTATTTGGGAACTTGGCAAGTAAGGAGATTGAAAGTGGAAAACCAAGCTGATTGCGG  
 CATGCGAAACTAACTTACTTATGAACCAATACCACTTCCTAAGTCATTTACACCTGACATG  
 TCGGAGGATTGGGAATACCGTAAAGTTATACTTACCGGACACTTCCCTTACAATGAAGAGAT  
 GTTTGTTGGTCCAAGAAAGAAAAATGGAGAAAAGGGTTATTTTCTGTTTACACCGTTCATTA  
 GAGATGACACCGGTGAGAAAAGTCTGATAGAAAAGAGGGTGGATAAGTGAAGAAAAAGTTGCT  
 CCTGACTCAAGAAATTTACACCATTTGTCTGCTTGCCTCAAGAAGAACACTTGAAAGTGGTTTTG  
 CTTAGTAAGACCTCCAAAGAAAAGAGGCTCGCTACAATGGGCGAAAAAGGATCCAAATTCTA  
 GATTGTGGCAGGTGCCAGACATATATGACATGGCAAGATCATCAGGGTGCACGCCCATTCAA  
 TTTCAAGCCTTGTATGACATGAAGGACCATCCAATAATCGAGGAACACACAAGAAACGAGGC  
 TTCACAAAACAATTCCACCTCTAGCCTGTGGAAGTTCTGGAAACGAGAACCCTACGACTGCTG  
 TAAACGGAACGCAAGCTGTTGATAATAATACATCGAAGCCTCGTTCTAGGCAGGAAATGCCG  
 ACAGACCAAACAATTGAATTCGATGAACGACAGTTTATCAAAGCAGGTGTTCCCATAGCCG  
 GAAGCCACTATTGATTTAAAGAATAACCATCTACAATATTTGGTAACGTGGTATGGCCTTT  
 CGTTTTTGGAGCACAATCTTCCCTCATTGTGGCTCTTAGGAAGGCGAAAAGAGGGGGCGTTGTG  
 TCCCAAGACCAACTAATGAAAGAGAACTGAAGCATTCAAGGAAATATATGTAA

>YDR169C 0.8 Cold

ATGTCAGAAAACCAAAAGGAGGTATCGCCTCCTCAAGCCATATCGGTCAAATCCGAGGCAAG  
 CTCTAGTATATTTTCCAAACCTATCTCCACATCATCACCCGCTGGGTTAGCAGCCGCTCAA  
 GAGTTACGCCCGGAAACTGTCCACTTTATTAAGTAAAGATTTATCATCTTCCAAGCAAAG  
 ATTACACAGACCTTATGCCTAGATATTCCTGTTTTAAAGATTTATCATCTTCCAAGCAAAG  
 ACGACTTATAATGAGTGTATGGAAAGTGGTGATAAAGAAAAATCAGTGGTATTTGAAAAAA  
 TTGGATGGGGTCAATGGTCCGCGAAAAGAGTAGACCCTGCCAACTTTGATAAGGAGCTGGAA  
 GCGACCAATTTTGCAAATGCAAAGGTGAAAGACTTGATTTCTCAAGAGAGTCAAAGAAGGAA  
 AAGCAACAATTCAAATTCATAATTCAGGCGGCAAAGTTGAAATGCCTATGAAAGTTGAGCATA  
 ATATCACGAATATCGATGGAGCCACCACCCGCTACCGCTGTTGCTTCCACCACCATTCCT  
 GTTAATATCAAACGCAGCAAATCTCCACTTGCAGCAGCAAACGTAGTATATATAGATGAAAA  
 TGCGCTAGCATCGGAAGATGAGGATGAGGAGTTTGATGAAGATGACCATCATTTACATTACC  
 AAAACAAATCGAGGAACAGCAGTAATAATTTGGAAAATCTTCAAATGGTGTATCCCTATAGT  
 TTCGGCAGGAGAAGGTCTCAAGTTGTGTTCCGCGATTCAACTCCCAGAGAATATTGAGCATGA  
 AATAATAGCACAAAAGATTAGACCGCTATTAAGAAATAGACGCCGTTTCGAGCATAAAAACCAC  
 ATACACCTTTTCAATTTCCAAACTAAACACACACCAAGATTCATCCTACCTTTCCCCAATACA  
 ACCTCAACGACAACCCCATCAAATAACAACAGTAACTCAAACCAGGCGAAGATAGATTTAGA  
 GAACTTACTGCGACAAGTGAGCCAACCTCAAGAAGAGCTTCTCGTCTGTCTGTATCGAAAG  
 AATCAAGTATTAGATCGACACTTTTCCCAAACAAAACTATTTGATCGTCACTACAAACCT  
 AACTCTAAAGCTACGTGGTTTCCACCTCCCTAAGCTAGAAGAACAGATGAATGTAAGTTT

AAATCCGATAGTATTATCGGACAAGGAGAAACATAGAGTAGCTTCACAACACCTGAATGGGG  
 AATCGTCGCCACAACCTTGTCCCATTTCTCATCATCAACCTCACTCAGATACAGACGAAGAA  
 GACTGGGAATCAATTGGTGCAGCTTCTCTGAGAAATAACAGTTTAGCACCTAACATAGACAG  
 CGTAGCAAGTTCTACTAATGGCGTAGTTAGCCCTAAACCTACAAATCCAAGTTTTACTAACT  
 CTCAGAATGGAGATATTGAGCCTCCCCTACAACACGACCAACAGAAACATGAACAGCAGCCA  
 AGAAATGGGGAAGACAATAGTGCTGCGTTTTTATTAATGAGCTTAAAACTTAA

>YNL327W 0.73 Cold

ATGAATAAACTATTGTTACATCTAGTACGAGTCATTTTCGATACTCGGCCTAGCAAACGCTCT  
 CACACAAACGCAACCGATTTTAAAAGATATTCAAATAACAGATAGTTATACCAAACAAAAG  
 AATGTACGGATCCAGATCATTGGTTCATAATAGAAGGGCAACTGTCTATTCCAAAGGGAAGT  
 CAGCAAATATAACATTTCCAAGTACCAGATGCTTTCAGCTCATTCCCTCAAGAACCCTTCAG  
 CATAAAACATAATTCTAACAGTGTGCCACGATATCACGCCAGATAAAATCGACGAACAATT  
 TCACCATTTCTATTCCAGAAAAGAGTTTACAGAAGATATAACTACTACATTTAACTTCCTTGCA  
 CAGCTTACATCAGATGCTAAAATCCAAGTTACAGAACCAAAAAGCATCGTTTACAGTTTCTA  
 TTCAGAAAATACTATGTTTTAATGACGTTATTGATTACGTCGCTAAAAATACTTCTGCTATAA  
 CAACAGATGGTGGTATATACAAAACATAATAATACCGCCTGGTTTACCGTTGACTTACCAATG  
 AGAACGTTTCAGAAATCCCGTTTATTTGACTTCTCAGACATCTTCCTCCTCAGATTACGTATT  
 CGATACTTCGTTAACTAAGTTTGGAGTTGTCACTGCCGTTGATTCTTTTAAACGAACCTATTA  
 ATGCTATCCCATATACAACCTGTTTCATGACTACTCCACAGAAGATGAAATTAGATGTTTATTT  
 AATTCACAAATCAGCGGTGGGCTATACTTCCGTGTGACTTATTTTACAAAAGAAGCTATCTAC  
 CTCGTCCATATCAAATACTGTGGAATTAACATATCCCGATGAAGGTACATCTGTTCAGACTTT  
 TAGGAAAGAGAGATACTTCAACCACCCTAGCCTCAGAATTATATTCTGAGTCAGCTGCTAAC  
 ATTGATTCCACCACCAGTGATGACACAACCTAGCTCTGATGCTGCTATAACACCAACATACTC  
 AAAATTCACGCTTTCTTTCTTATACTTCGCAATCATCCGCTATCCCTGAAGTTGCGGTTACTG  
 CATCATTGAGTAGCGGGATCCTTTCTTCTACAGTTGACGGTGCTAGCACCTCGGCGGACGCT  
 TCCATGTCCGCTGTCTCTACGGTTTTCTTCTAGCAGTGAACAAGCTTCTTCTTCAAGTATTTT  
 TTTATCGGCTCCAAGTTCTTCAAACCTCAACCTTTACTACTCCTTCATCTTCTCTGTCTGCTA  
 CTGAAACATATAGTATTATCAGTTCAGCTAGTATATCTGTCCACACAGGCTTCCCTACATTGAT  
 AATTCACAACTACCGCTGTTACCCAATCTACTTCTACTATAGCAGTTTCATCTGCTGAAAA  
 ATTGTCAGCACTCTATCATACACCAGTAACGTCACAATATCAGTATCATCAGCTACCCAAC  
 ATACTACTACTCCTTCATATGTTAGTAACTCCACTACACTCTCATCCTCATCTGTTCTTGAA  
 TCTGTAATTAGCTCTCCATACCTGGCAAACACTACTGTTTCAGGAGCTTCATCTGCAAGTCA  
 ATCTACTAATCCGCCATATGTCTCCAACCTCCACAACATCATCCGCAACTCAATTAGCCACCA  
 TTGCTCCGTTTCGCGATTAACATAACAGGAACAAGTATTTCTTCTAGTATCACTAATACTTCT  
 TCAGTTAGTTCTACTACGTCCAGTTTATCATCCGGCCCATTTGTTTTCAAACACAGCGGTTGC  
 CTCTGGGTCTTATATTCTAACCCTACTACAGAGTCTGCACAACCTTACTGAAATAGGGAGTT  
 TGATAACCAATCTCGACTATTACTACTAGTACCACCCTTCTGGTACCGATAAAAAGTGGTAGT  
 AATAAGGTGGCCTCTTCAACTGAAATAGCGCAATCTATCGTAAACAACAGTTCACTTTCTGGT  
 GTCAACAATCAACACTAACGCTGCGACAGCAGCTGCTAATGCCAGAAATGCTACTTTCACTC  
 ATGCAACCCATTTCTGGTTTCGCTTCAACCCTCATATCATAGCAGCTCACTATTATCGTCCACA  
 ATTGACACCAAGGTAACCTACTGCTACTACAAGCACCAGTAGAGACGGTAGTTTCGAGTTTGGC  
 TTTCAACCACTGGGCTCAATCAATCCGTAGTTACCGGTACAGATAAAAAGTACCTATAGTG  
 TAATTTTCATCCACAGAATCAGCCAGGTTACGGAGTACGACAGCTTACTTCCAATTTCCACC  
 CTGAAGCCTACAGTCGTTACAGGTACAAGTAGAAACAGTACCTTTAGTATGGTGTCTCTCCAC  
 CAAATTGACCGAAGCTACTGCAACGGATAAAAGGTGATGCGTATAGTGTAATTTTCATCTACAC  
 AGTCGGCTCAAGTTACTGAATATGGAAGTATGCTTCCAATTTCTACGCTGGAACACCAACA  
 GTCATTATGAGTACCGATGAAAGCGGCTATTTTACTTTAACTACATGTACTGAGTCTGGGCA  
 AGCTACAGAATATGGTAGTCTGATTCCAATTTCCACACTAGATGGTTCAGTTATATATACAT  
 TTTACTGGCGAAAGTGTAGTGGTGGGTTACAGTACCACAGTGGGTGCCGCCAATATGCACAA  
 CATAAAGTTTGTCCAGTATCTACCATCAAGGGTTCCAAAACCTTCTCTTTCAACCGAGGA  
 AAGCGTAGTGGCTGGCTACAGTACTACAGTGGGTGCCGCCAATATGCACAACATAACAAGTT  
 TAGTCCCGGTATCTACCATTAAGGGTTCCAAAACCTTCTCTTTCAACCGAGGAAAGCGTAGTG  
 GCTGGCTACAGTACCACAGTAGATTCTGCCAATACGCCGAGCACACAAAATTTAGTTGCCAT  
 AGATACATTGAAAACCTAGCACATTTCCAAAAGCAACAGCAACTGAGGTTTGTGTACATGTA  
 CCGCCCTTTCTTCCCCTCATTCTGCAACTTTAGATGCAGGTACTACTATTTTCATTGCCAACA  
 AGTTCAGCACATCTCTATCTACAATAATTACCTGGTATTCCTCATCTACTATTAAGCCTCC

TTCAATTTCTACATACTCGGGCGCCGCTGGTCAATTAACCATCCGTATTGGCAGTTTGTTC  
TAGGGTTAATCTCATTCTGCTGTAA

>YGR009C 0.72 Cold

ATGGGATTAAGAAATTTTTAAGATTAAGCCTCCAGAGGAAGCGACACCAGAACAGAACAA  
GGATACTTTGATGGAAGTGGGTATTAGTGTCAAAAACCCCTAGCAAGAAAAGAAAAGAGAAAT  
TTGCCGCTACGGTAAATTTGCAAATGATAAGCTGAAGATAAGGTATACGCGCCACCAGGT  
TATGAGCAGTATGCTAGGCCACAGGATGAACTTGAGGATTTGAATGCTTCTCCCTTAGATGC  
CAATGCTAACGAGGCAACTGCTGGTCTAATAGAGGTTCAAGTGGCACGCAAGATCTCGGAA  
ATGGAGCAGAATCCAATTCTATGCAAGATCCGTACGCTATCGAAAATGATGATTACCGATAT  
GATGACGATCCTTATGCAAGGTTTCAAGCTAATAAAAGTAATGGGAGAGGTAGCGTCAATGC  
TGCGCCTTATGGTGATTATGGAGGGGGGTACAATGGCACATCTCTGAATTCATATAATAACG  
ATGGCCCGTATAGTAACCAAAATACTTCAAACAGCTGGGTGAATGCGAATGGCCGTAATAGT  
TTAAATCATTCAAACAGCACTTTAAACGTAGGGCCTTCGAGGCAAACAAGGCAACCGCCGGT  
TTCAACGTCGACCAACAGCTTATCGCTTGACCAAGAAGTCCCTTAGCAAACCCGATGCAAG  
AAAAGAGAAATCCTTACGCTGATATGAATAGTTATGGCGGGGCGTATGACTCCAATACTAAT  
AGATCTAGCGGTACTCGACAAGGAAGCTCCAAGAATGCAAAATCCATACGCCTCTATGGCGAA  
CGACTCATATAGTAATGGAAAATTTGAACAGGTCTGCAAAATCCATATTCTAGTAGAAGTGTGC  
GTCAACCGCAATCGCAACAAGCTCCAATGACTTATACGCCCTCTTTTATTGCTTCTGATGAA  
GCAGCAGCAATAGTGAAGTTGATTTAAATGAAGAACCTAGAACAGGTGAATTTGATTTTGA  
AGAAGTTTATGCTGACAAGTCTGCAGAAAATAGAGCGGCATTAGATGAGCCTGATTTGAATG  
CAGTAATGACGAATGAAGATTCAATAGATTTAAATGCGTCCGAAGTTGATCATAGTTCAAGA  
CAGCAGCAGCAGCAACAGTGGTTCATGGATGAGCAGCAACAGCAACAGCAACACTTTAACGC  
AACAAATAACCAATATGGAGATCAAAGGGGTTACAAAACATTTGAAGAAAATACAAAAAGAA  
AGGAGGCTCGCCAGCAGCAGGAAGAAGATGAAGCAGTAGATGAAATCAAGCAGGAGATCAA  
TTTACGAAACAGAGTTCCGTAGCCTCTACTAGAAATACACTAAAAATGGCTCAAGACGCCGA  
AAGAGCAGGTATGAACACATTGGGTATGCTGGGTCAATCAAAGTGAACAATTTGAATAACGTAG  
AAGGAACTTAGATTTAATGAAGGTGCAAAAATAAAGTTGCAGATGAAAAAGTTGCAGAACTA  
AAAAAATTGAACCGTAGTATATTGGCTGTCCATGTTTTCTAATCCGTTTAAATCCAAGAGAAG  
GAGAAGGGAGAGGGAAGAGCAGCTGAAGAATAGGAAAATTTGAAGAAAAATTAATGAGAGAGC  
AAACAAGTCAACAATTGTCTCAGTCCACTCAAAGAATAGAGGGTGCTATGAACGCAAAATAAT  
AACATAAGTGAGGTGCGGGAAAGATATCAGAGGAAGAATGTTCTAGAAAAGGCAAAAGAGATA  
TCAGTTTGAGAATGATGAAGAAGATGACGAAATGGAATTTGAAATTTGATAGGAATTTGACC  
AGATTCAGCAGGTTAGCAACAGATTGAAGAAAATGGCCTTGACCACTGGTAAAGAATTTAGAC  
TCTCAGCAAAAACGTCTCAACAACATTGAGGAAAGCACTGATGATCTAGATATCAATCTCCA  
TATGAATACCAACAGGTTGGCAGGTATCAGATAG

>YDR292C 0.71 Cold

ATGTTTCGACCAATTAGCAGTCTTTACCCCTCAAGGTCAAGTACTTTACCAATATAACTGTTT  
AGGAAAAAAGTTTTCTGAAATACAAATTAACAGCTTTATATCCCAGCTGATTACTTCCCAG  
TAACTAGAAAAGAAAGTGTGCAAACGCAAATACAGACGGATTTGATTTCAATCTTTTAAACA  
ATCAACAGCGAACACAAAAATTCTCCTTCATTTAATGCACTATTTTATTTGAATAAGCAACC  
AGAATTGTATTTCTGTTAGTACTTTTGCCGAGCAGACTTTAGAGCTTAATCAAGAACTCAAC  
AAACACTTGCACTGGTGTAAAACCTCTGGAATCATTGCATTTAAGTGAATCCATTCTAAAA  
AATCGTCAGGGCCAAAACGAAAAGAACAAGCATAACTACGTCGATATTTCTCAGGGAAATGA  
AGACGACCTGAAGAAATTTGAGCAATATTTTAGGATAAAAATATGAAGAGTCAATAAAAACAAG  
ACCATATCAATCCAGATAATTTTACCAAAAATGGATCAGTACCCCAATCGCATAATAAAAAT  
ACCAAGAAAAAATTGAGGGATACAAAAGGTAAGAAGCAATCTACAGGAAATGTTGGTAGTGG  
GAGAAAGTGGGGCCGTGATGGTGGCATGCTTGATGAAATGAATCATGAAGATGCAGCCAAAT  
TAGATTTCTCATCATCCAACAGCCACAATAGTAGCCAAGTAGCTCTAGACTCCACTATTAAT  
AAAGATTCTTTTGGGGATAGAACAGAAGGAGGCGATTTCTTAATCAAAGAAATTTGATGATCT  
TTTGTCTTCTCATAAAGACGAGATAACTAGTGGGAACGAAGCTAAAAATTTCTGGATACGTCA  
GTACAGCTTTTGGATTCTTCAAACACAGTCTTAGGTAACAAAACGATCAATGAAAGTGAT  
TTGAAATCTGTATTAGAGAAGTTAACACAACAATTGATAACCAAAAATGTAGCACCAGAGGC  
AGCAGACTATTTAACACAGCAAGTCTCACATGATCTTGTAGGCTCAAAAACGCAAAATTTGGA  
CCAGTGTGAGAACTGCTCGTGAATCTTTAACAAAAGCATTAACTCAAATATTAACGCCT  
GGTGTATCCGTTGATCTCCTCCGTGAAATTCAGAGCAAAAAGAAGCAAAAAGGATGAAGAAGG

TAAATGTGATCCCTATGTGTTCTCTATAGTTGGTGTAAATGGTGTGGTAAGTCAACAAATC  
 TTTCAAAGCTAGCGTTTTGGTTACTGCAAAAATAATTTCAAGGTCTTAATTGTTGCTTGTGAT  
 ACGTTTAGGTCTGGTGCAGTTGAGCAACTAAGGGTCCATGTTGAAAATTTGGCACAGCTAAT  
 GGATGATTACACGTTTCGTGGCTCCAAGAACAAAAGGGGTAAAACCTGGTAATGACTACGTTG  
 AACTATTTGAAGCTGGTTATGGTGGATCTGACTTGGTAACCAAATTTGCAAAGCAAGCCATC  
 AAATATTCTCGTGATCAAACTTCGATATAGTGTAAATGGATACTGCCGGGAGAAGGCATAA  
 TGATCCTACTTTAATGTCGCCATTGAAGTCTTTCGCTGACCAAGCCAAGCCAGATAAAAATCA  
 TTATGGTTGGAGAGGCTTTAGTAGTACTGATTCTGTCCAGCAAGCCAAAAATTTTAATGAT  
 GCCTTCGGAAAGGGAAGAAATCTTGACTTCTTTATTATCTCCAAGTGTGACACAGTTGGTGA  
 AATGCTGGGTACTATGGTAAATATGGTTTATGCTACGGGGATTCTTATCTTATTCGTTGGCG  
 TGGGACAAACCTATACCGATTGAGGACATTAAGCGTAAAATGGGCTGTTAATACATTAATG  
 TCTTAA

>YGR018C 0.81 Cold

ATGATTGACATTTCTCACGGACACACTTCTTGTTCCTCCACAGATCTTCGTCTTTGCCGTC  
 GGTTCCTGAAAATCCATCTTTCACCACCTCTTCCCTCTTTCAGTTCAAAAAATCAACAG  
 AATCAACACAAAAGACAGACAATACCAAAGTTTTCCAGTCCAGCGTCTCTTTAGCACCGTCA  
 ACTCCTCTATGGAGTTTGTCCAGTTGTTTGTAGTTTTCAGAGGTAAGTTTTCTGGCCCCGGGC  
 TGGCTTCCTATACAATGACTTGGTATGCCTTGATAGAGAGGACCATTGTCCTTAGTAATTCAG  
 CCTCCATTCTTGTGGTTGA

>YDR375C 0.81 Cold

ATGTCGGATAAGCCGATTGACATACAATATGATAAACAGGCTACTCCAAATCTGAGTGGTGT  
 AATTACTCCGCCAACAAATGAACTGGTAATGACTCAGTCCGGGAAAAACTTTCAAACTAG  
 TTGGCGATGCTATGTCAAACAATCCCTATTTTGGCCGCCGGCGGTGGTCTTATGATCCTTGGT  
 ACAGTTTTAGCTGTAGCTAGATCCGGTATAATAAAAAGCCAGCAGGGTCTTATACCGACAAAT  
 GATTGTCGACTTAGAGATTCAGTCGAAGGACAAATCATAACGCTGGTTTCTAACATGGATGG  
 CCAAACATCCTCAAAGGGTATCTAGACACTTATCCGTTAGGACAACTACATACAACATGAC  
 AATGGATCAGTTAGTACAAAATTTTCGCTGGTTCGGGGTCCGGGAAATCATTGGATTCTTTA  
 TAAGGGTGCTTTTATCCTGATTAATAAGAGAAAGGTCCGCAAAAATGATAGATATCGCAAACG  
 GGTACCATTTGAGACCGTAACCTTAACACTACTGTACCGTGACAAACATTTGTTTCGATGAC  
 ATTTTGAACGAGGCTAAAGACATAGCCCTGAAGACTACTGAGGGCAAGACTGTTATTTACAC  
 TTCTTTTCGGCCCTGAATGGAGAAAGTTTTGGTCAACCAAAGCTAAAAGGATGCTGCCCTCCG  
 TCATTTTGGACAGTGGCATCAAAGAGGGTATCTTCGATGACGTTTATGATTTTATGAAGAAC  
 GGCAAATGGTACTCTGACAGGGGTATCCCATATCGCAGGGGATATTTACTCTATGGCCCTCC  
 CGGATCTGGTAAGACTAGCTTTATCCAGGCTTTAGCGGGCGAATTAGACTACAACATTTGTA  
 TTTTAAACCTCTCCGAAAATAATTTAACAGATGACAGATTAACCCTTAATGAATAACATG  
 CCAGAAAGGAGCATACTATTACTGGAAGATATTGACGCGCGGTTCAACAAAAGAAGTCAAAC  
 TGGTGAACAAGGTTTTTCATTCTAGCGTAACATTTAGCGGTTTACTGAATGCCCTGGATGGCG  
 TCACATCTTCTGAAGAACTATTACATTCATGACTACCAATCATCCTGAAAAGCTAGACGCG  
 GCTATAATGAGACCAGGTCGTATTGACTACAAAGTCTTCGTTGGTAACGCAACTCCATACCA  
 GGTAGAAAAAATGTTTATGAAATTTTACCCAGGTGAGACTGATATATGCAAAAAGTTTGTAA  
 ATAGTGTAAAGAATTGGATATCACCGTAAGTACCGCCCAGTTGCAAGGACTTTTCGTTATG  
 AATAAAGATGCACCACACGATGCGTTGAAAATGGTCTCCAGCTTACGGAACGCTAATCATAT  
 TTTCTAG

>YDR421W 0.79 Cold

ATGCTGCTAAGAAAAGGCCTTCGGGAAACGCAGCATTTGAACTTCCAAAACGGAGAAGAAC  
 CTACCAAGCTTGCATCAGCTGCAGATCAAGGAAGGTGAAATGTGATCTTGGTCCGGTTGATA  
 ACCCACACGACCCACCGTGTGCACGTTGCAAAAAGGGAGCTAAAAAATGTATTTTTAGCTCT  
 AATAAGGGAACCTCGAACGACTTGCCTCCTAATTCGATTAATGCAATAAGTCTGCCATCTCT  
 AGGTAAGAGTAAGCAAGAGATACAAAATGACTCAACGAGCCCAATTTTATCGGATGTACCTT  
 TGTCAAGAAAAGGGATTAGCAGTGAAAAATCATTTAAATCAGAAGGGATGAAGTGAAGCTT  
 GAACTTTCCTCCATGCAGAACGCCCTAGAGTTTCTGGCCAAGCTGCTGGAAGTGTAGCAAA  
 AGAAGGCGCAAAAAGAAATCATAAAAAGAGAAGTCCACAACACCGAAACCACTGAAAAGTCTT  
 TGGATGCGACAAAATAAATCTGCTACGGACGAGGGGTTGAAACGACTTTCAAAAAGTGACAGT  
 ACTAACACACTTTACGAAAATACAGCAGATATGCTTAACCACACGCTGAATACGAATAGGAA

AACATCACAATTAATGGAAGAAATCGGGAAAGTGAGACCTCCACCTACCCGGAAAATTGACG  
ACTTCGATTACATCGGTCCAGATAGCTTGCTTACTAAAGAGGAGGCGATTGAACTCATAGAG  
GCATTTTTTCTCACGATGCACCCATTCTTTCCCAATATCCCACTTCAATTGCATGATCCGAA  
AGAATTAGCAGAATATCCAATTTTGTGTTTGTGCAATTTTACTGTTTCTGCTCGCTATCATC  
CTTTCGATACTTTAGGATTAGACAATGGAGAAGATGGGATGAGACACATTGAAGTTCACGAT  
AAATTTATGGGTGTATTGCCAGAAGCTTATATCTCAAACAATTTGGGCAGAGGCTAGTACTAG  
GTCAATTGGCACCCTGCTTGTCTTTCATAATTTTCACGGAATGGAACCCAAGGAGTATCCACT  
ATAAATGGTCTGACTATGCAAATGATCCTGAGTTAAATAATGTCAACGCTAGAGGAAGTAAG  
AATATTAGTACGAGGAAGGACGAAGAAGGATTGACCGGTGTCGGCGCAATCCGTAGAAGCGA  
CCGAATGTCATGGATGCTGACAGGGTCTGCAGTAAGGCTGGCGCAAGATATGGGATTCATTG  
AAAACAGCTCAAAAAGTATTCATTGTCACTCATATATCTGAGACTACCAGTGTATGAATATG  
AATCAAAGATCCTTATTAGCAGAATCATTACAGCGTTTTTAACTTGAATTTAGGAAAAATTGA  
AAACGATGGAAATGAAAGCAATGAGGATTACCTTGGGAATGAAAAATTTTATCTGAATGAGA  
TTTTGCCTGATGAAGAAAGTAACTAAGGTGGAAGAGAGTTTTTGAAACTCAGAAAAATGAC  
CACGACAACGAGAAAAATTTTTTGACTGATTGGGAGAGGGAGTTTTTAAACGATGAGTATGT  
TCTATATTATTCTAATAAAAAAGATGATACTAATCTAGCACAGAATCACATACCACCATTTTC  
CACTAAGATTCTCATTGCCCCAAAGAGCAAAAATAGAGATCATTTCGAATCCTATCCATAGCA  
TATGAGACGATTTACTGTGAGAAGAATAAGAGGAAATTGGCAACGACAGATCAGAGACACAA  
CCTCTCTGTCTTAAGTGTTTTTTCTCCCTTGATAGAGGGCTGGCTCAGTAACTACAGAGAGC  
TTCTTGTACCCCTTTCTGATGTCCCTTTCTCACTAGCAGATAGGAAGAACAAAAACAAATA  
TTTGATAACATCGATAGAATAAATGGTGAAAGTATTATCACAGATTTCAATTATTGTCAACT  
TTATATCTTTTTCCCTCGCACTGCAAGTGGATGGGAAAAACAAGCAGATTGAATATGAATGAAA  
TTGTGACAAGCGCGAGGTATGTGGAATTAGCATAACAGATCTGCAAAAAGAAATATTGAGTTCT  
GCAAAGCGAGTTTCAAGGCAAGGAATGCTAAAATACATGCCCGTAAGATGGGTAATACGAAT  
AATTAGATCCATTGCGTTCATAGTAAAATGCTACCTAACACTTACTGGTAGTGAACCTGGCAA  
CAAATCCAGATGCCAGAAACATTTTTAAAATTAAGTGCAATATCGGTTGACGAAACATTCGAT  
ATCATCCGTGACACTGCGGTTACTTTGAAAGAAGCTACACCAGATGAATTACATCTATGTCA  
AAGATACGCAGCCATATTAATGTACTTATGTACAGAGATGAAACTTCGAAAAAAATCTTACT  
TAGAACGACCACCCTTATTAAGAGATGGCACCCTCCTCTAGAGAGCAATCGCGAATCCTCA  
CTGGAGGGACAAGACTTAACCTAAGAAGCCAATATTCTCTAAACGTATTGGATATAATAAAAC  
CGAGACTACTTTTGAACCTCGGAAAGGCCCTTGACGGAGGAAATTAATAGCAATTTCTCAGA  
ATTCAAATGATACATCTTCTAAAGGTATCGTTGATCCTTTTGTGTAACAAAACAACGATATC  
ACAACAGCGTTACTGAACAATGAACTCTTCCAAGGTCCATCTCTATCTGACGAGGTTACAGA  
TTGGTTGCGGTGCTAGTGAAGATATCGGGCTTGAATTTGTAGAACCATGGACAGAACTTATTG  
AGCAACGATATATGCAATGTGGAGATGGTGATAATAATAATTTGAAAAATTTATACAACCTTG  
TTCGTGAATAGTAATAACATCAATAATGATATTAATAACTCAAGCCAATAACGCGTAAATA  
A

>YDR104C 0.79 Cold

ATGGATTCTATCGTTAATGTTGTTGAAGACGATGTTAAGTACGCGCAGAGAGTACTAGCTT  
CAGCTCACCACAAAATGCAAAATGTCAAGGTCTTACCATTCCCCGGCATTCCTTACAGCGT  
TTAGACTGTCGTATGTTTACCTACAGAGCTTTCAGCATGTTACAGGTGACTTTGCTAGGT  
GGTATTCAAAACAATGGTACGCTGATCAAAAATAATCAAGTCTGGAAACTTCTAACTAAAAT  
TTCATTTCGGAAGGTTAGGAAGCAATCTGACATGCTAAGAAGATATGGCTATGGAACAATTT  
ACAAAAGCGGTGAGGGAAGATCCCAACTGCATTGTACTTAAGAAAGCACTTTACATGGTCC  
TATGAAGATAATACATCAATTCACAACGGTCATCGTCTTAAAGAAGCGGAAATGGAGATGAA  
GAGAACTAGGTCAAGTCCCTGTGCAGAAAAGTGAATATAAATTAAGTCTACCCAGAAGGTGTA  
GGAGTTCTTCCGATCAAAACTTCATGCGACAAGAGCTTTTGAAGAAAAAAAATCAGAGCTT  
TCTAGAAAACAATAGTTTGCCTCTCATCGATACGGCGCAAGCCGTGGATATCCACCCAGTTTT  
ACATGAAGAAGATCAAGAAAAACAAAATAAAAGGAATAAATCACTCCTTTCGAATTTGAAAC  
GAAAAGATCTAGGGGAATCAAAAAGCATATCCAGAAAAGATTATTTCGATTTTGATAGAATA  
CCGAGCCCCTCTTACGCCAGAAGTGTGGAGAAACAGACTTTAATTATAATAGAGAACCCTTC  
TGAAGATACTTTGAGATATCCCGACAGTATAATTGAAGTAACAAATCGGACAAGCCCCGCC  
CAAATAGTATTCTAAGTAGATCAGGACAATTTGTAACTCGAATGACCTAAGTGATGGCTTT  
TCAACATCTAATACTATCAATAACGTGGGATTAATGCAAAATGAAAAGATTTTTTTTAAATGC  
TCTACAAAGTATGGAAAAGGAAAACCTTGATGCTGTGGAAAACATCCAGAAATATGGGACTT  
ATCTCGATGAAAAGACGTAAGGAGTGCAGGATGCCTTTCAAAAAGAGAAAAGAGGTTTTCATGCGT



GACATTGGTAAGTTGCATTTCGAGTCATCTTCCGTTTATTAATATCCTACCTCCATGGCCTAC  
CGAACTGACGGAGGAAGAGAGAATTATACACGATAGGCTAGCCTCTAAACATTCTCATCATA  
TAAGAAAACATGTTCCACAATGCTCGAAACAAAACACTAGCTGCAAATCAAAGATAGTGTGGA  
ACTTTCTTAGGTATGACAAATTCACCTAACAAATAAAGCAACTGTCAAGAAACGCACCGGTCA  
GATCCTTAAAAAAGAAAAATGCTAGTGTGTTAAAGAAAGCTATACAAAATAAAGTACCAC  
TTCCCAACTTCTCTGAAAACGAGTGTCTTGGATACAAGGGTCAGTGAACGGTGGAAAGAATAT  
ATTGTTATTGCAAGATCCACGGGAAGATTTCGATCCCCGATACTTTTACAGTTCTATCGTCA  
TCGTTCATATCCCAGAAATCGAAGATATCAGTTCATAGCTACAAAGTATCACCGCAACCCGT  
TGGATTTTTTTCTTTCAAGAAATTTGTATTGTAAAATTCTACAGCTCTCTAGACAAAATA  
TCCATACAAAAGCCTGATAAGCGGTTAGGTGGGTTTATAGACGAGAGTATTGAAAAGAAGGA  
CGAATTAAAAACACTATTTCCCCCATTTAAATTTTTATCTTAAGATGCAGCAGTATTCGTTTCGT  
CTGGTAGATGGTACAAATTTCTACTAGAATCTTTGGACCGACAACACTATTTACACCTGCCATC  
AACTTGAAAATTCATTAACTGAGATCTCGATAAAAATAAACTTGAATGAAATTATATTCCA  
AAAAGCTAATAGATTTAGGGAAGCAGGAAAAAGATAGATTAAAAATATGTTTTCTTCAAAGAG  
GTTATAAAATTTTCCAGCATCCCATTTTACGATATTTACAGTTGCTATTTTGGAGAAAATTA  
AAATTTGGCGCATTATGACTATCTGATTAGAAAATGGGATACAGAAAATCCTGTACTAGGATG  
TGCCCTGAAAAGATATGATAGATTGGAGTGGATTCCATGTGATGAAGATTCTCTGGTAACTG  
GAATTTTTTGCATTTTGTCAATCTCACCTAATCCAGTACAGGCCAATTGCGAATCGTTTAAAGG  
GAAACAAAATCTTTAGAAGGAAAATGTCTGAAAGAACCAACACCTATTGAAGGTTTTTTAAT  
AAGATTGACTGACAAGTATGGCTCTGCGAGGACAAATTTTGGTAAATATAGTATTTCAACAG  
CTTACTTCTTACAGTGTGAGAATTTGCTTTTTTTCGATGAAAGCATATAGAGCAAACCCACCA  
TTGCCTATAGATTTCGATGATTGACGACACTAGCACAGAAATAGAAAAAGAAGAAATTTGGAA  
ACAGTGAAGAAAATTCAGAGGTTTACGAGCAACAACCTTATCCCTTAGACACAAATGATC  
ACATCGAGTGGATGAACTGTCAAACGACCCAAAGTGAATATGATTCCAGAGATTTCTATGCT  
TTCCATTGTTTTTCATAGAAGGATTGATCAAAATACTAAAAACGGACAATGTGATTGACCTAAC  
TGAGGTGAAAAGATATATATCAAGGAACAAGGACTGATTACGAAGCAGACAAAATAAAATATG  
GGGTTTACAAGGAAGCTAGTGAAATCTTTTTGGCATAGAAACTACGAGATTGATGATGTTTCA  
CGGTCCGTAATAAATATAGAAACCTCAAATGGACTCCTCTTGAAGCTGCTTGTACATCAGC  
AACAGTTGCTGAAGAGTGGGTCATAAAGCTGAAACAAATGATATCCTATTGAAAAACAAGC  
AAAGGGAAGATACGGAGAGGCTTTTTAAAAATAAGGCGTTCAAATGCAGGTCTTTTTGATGCTA  
AATGGAGAAGAGGAAACAAAAATTTGGTGAGAATACATTGCGCTGGATCGTAGAACATGGGCG  
TGCAGATGAGCAAACCTTTAATGCAAATGGAATATCATTAAAGTAGGCCGTTAATTCAAAAGG  
GACCTTTATATCAAAGCCGCACAAGCATTCTGTTTTCTCGAAGTACTACGTCGTTTTGATA  
TCAGTTTTTATTGTACTGTTCCACTGCTTTTCATAGATCAACCACAGGTTTTGCTAAGGAAGT  
TTTGGAGTATGCTCATTATGTAACCATTCCGATTGACGATTGCTACCTATACTCTGGGACCA  
CAACAGAACTAGACCTTCTGCAGAGAGATCGTACTTTTTGACGAAATAAACTATGGATCCCAC  
GCTCTCCCACGAGTTTTATGGGGACGGATGGCGATCTGTAGAAGACGAGAGTTTCGCGATGCTT  
TACGTTTTGGTTTGAACAAGGCGTGCCTTTCTAGCAATCGTTACAGAAGAAAGGGAATG  
AAAAGCAATATACGCAAGATTATGGTAGACAAGATAATAATATTGACCCACCTTCTGCTCCG  
GAAGCTGACTTGAATAACTCTAATGTTCCAAGTAACACAGATAAGATCCATTTCACTAAAAA  
GTTAGGTGTGAGCGGCAAGTCAATGGTTTTTCATGGCAAGATCAAGACAGGAAAGAGATCTTT  
GGGTAATGTCTATTTACTATGAACCTTGAAGACTAAGAAGAACTGCGTCCACTTCAAATTCA  
CGGAATCAAACCTATGTAA

>YKL120W 0.71 Cold

ATGTCATCTGACAACCTCTAAACAAGATAAACAATTTGAAAAACAGCCGCCAGAAAGATATC  
GAAGTTTGGTTCGTTTGTGGCTGGTGGGCTAGCAGCATGTATAGCTGTTACAGTTACTAATC  
CGATCGAATTGATTAAAATCAGAATGCAGCTTCAAGGTGAAATGTCAGCATCAGCTGCAAAA  
GTTTATAAAAAATCCAATCCAAGGTATGGCGGTAATTTTCAAAAACGAAGGTATAAAAGGTCT  
GCAAAAAGGGTTAAATGCTGCTTATATCTATCAAATTTGGGCTAAATGGTTCAGATTAGGGT  
TTTATGAGCCAATCAGATCATTAATCAGCTTTTTCTTCCCAGATCAAGAGCCACATAAG  
GTACAGAGCGTCCGAGTTAACGCTTTTTCTGGTGCCGCATCTGGTATAATTTGGTGCAGTCAT  
TGGCTCTCCATTATCTTGGTGAACAAGACTTCAATCATATTCAGGTTTTATAAAAAATTG  
GTGAACAAACGCACCTACACCGGTGTTTGGAACGGGTTAGTAACCATTTTAAACCAGGAGT  
GTTAAGGGTCTATTCAGAGGTATTGATGCGGCAATTTTAAAGGACAGGTGCTGGTTCTCTGT  
TCAACTACCTATCTACAACACAGCAAAGAACATTTTGGTCAAAAATGATCTGATGAAAGATG  
GCCAGCATTACATTTAACTGCTAGTACTATCTCTGGGTTAGGTGTTGCCGTCGTTATGAAC

CCATGGGATGTCATTTTGACAAGAATCTATAATCAAAAAGGTGACTTGTACAAGGGACCTAT  
 AGATTGTTTGGTCAAACTGTTAGAATCGAAGGTGTAACCGCTTTGTATAAGGGTTTTGCAG  
 CTCAAGTGTTCAGAATCGCACCTCATAACAATCATGTGTTGACCTTCATGGAACAGACAATG  
 AAAC TAGTTTATTCGATAGAGTCGAGAGTTTTAGGCCATAATTAA

>YNR060W 0.79 Cold

ATGTTGTTGGTACATATTATATCTTTCTTCTGTTCTTCCAGCTTTCGGCCGCAAAGGCCCC  
 ACCCAGTAAAACGTCTCTAATAAATACTCATGAGAGAAGGTCGATATATTCATGCTACGTTG  
 GTTACGTAAAGAAACATGGGGGTTCAATGGGTCCGCTATATGTCGGTATGAACCAGCAATC  
 CAATCGATGCTTTACTGTCTTTACGAAGACACGCATGAGAAAGGGTATTCAAATAAACTTT  
 GGAGAAAGGTTTTGAAGAAATGAGACAATTTTGCTATACACCAAAGTTTTTGAACATGACTG  
 ATGCCGAGTTTTACACCTCATTGGATAATGGAACATACTATATACAAGATCAACCTAAAGCT  
 GGCATCAATATCACTTATCCTATCAGACTGAACTACACTAAGAAAAGCATACTATGATGC  
 ATACTATGGTTACTACTATAACCATGACATTCGGTATTATTTTCGGGGGCATTATCTGTGCAT  
 ACTTTGTGGGTGTCATGTTGCTTGCAGGTTAATTCGTTTTTTGAATTATACCCCAATAAAA  
 AAGATTATGTTTTAGCAAAAAGCTAGTCAATTACGTGAGAGGTTATACTACTCTACCCACTCT  
 TTATGAAAAGCATGCAGAGCCCTTCTCGTACTTAAAAGTGATAACAGGCTATCTTCTACTA  
 GGTGTTGAAACGTTGGTTATTTTAGGCTACCTCATACTTCATACCATTTTCATGGCCTACAAA  
 TATCAATATGATCCATACCACATCATATTTGCCGCTCATAGAGCAGAAGTGGCACATTTTGT  
 TCGGTACAGAAGCGGTATACTTTCTTTTGCACACCTGCCACTCATTGTTTTATTTGCGGGAA  
 GAAATAACTTTCTCCAATTATTTCTGGCTTGAAGCATACTCATTTCATTGTGTTCCATAAG  
 TGGCTGGGAAGAATGATGTTTCTTGATGCAATAATTCATGCTGCCGGCTTACGAACATTA  
 TTTGTATTATAAAAAATGGAATACGGTTAGATTAAGAGTCTACTGGAAATTCGGTATTGCTA  
 CCACCTGTTTAGCGGGAATGTTAATTTTCTTTTCCATCGCAGCATTTAGAAGACACTACTAT  
 GAAACGTTTATGGCCCTCCATATAGTATTCGCAGCACTATTTCTCTATACTTGTGGGAGCA  
 TGTACTAACTTCAGCGGTATCGAATGGATTTACGCGGCAATAGCAATTTGGGGAGTTGATA  
 GAATTGTACGTATCACCAGAATTCACACTCTTAGGATTTTCTAAAGCAGATCTACAACCTGGTT  
 GGATCTGATTTGGTCCGTGTAACGGTTAAAAAACCAAAGAAGTTTTTGGAAAGCAAACCAGG  
 CCAATACGTTTTCTGTTTCTTCTTGCCTCCATTTGTGCTTCTGGCAGTCGCATCCATTTACAG  
 TGATGGATTCTTGCCTAAACGATAGAGAATTTGGTTCATCGTTCTGAAAGCAAAGAAAGGTGTG  
 AAAAACTGGTAAGAAACTTTGTTGAACGTAAAGGCGGCAAGGCATCCATGAGATTAGCTAT  
 CGAAGGCCCTTATGGCTCCAAGTCCACCGCCCATCGCTTTGATAATGTATTATTGTTGGCAG  
 GTGGCTCAGGGCTTCCCCTGTTCAATTTCTCATGCCCTTGAATTAGGAAAGACAACAGCTGCA  
 AGCGGTAAAACTTTGTACAGTTAGTCATAGCAGTAAGAGGACTAGACATGCTCAACCGGTG  
 TAAGAAAGAATAATGGCATTAAAGGGCTTGAATGTTCAAGTTCACATTTATAATTCTAAGC  
 AAGAGCTAGCTTCGGCTGAAAAAATTTCTCCTCAAATGAAGTCAAAAACGGTGAACGCACAGCA  
 GAGAAGGCCCATCTAGTCTAAGCAATTCAGAAAAAGCTCCTTCTGAAAGTGAATAACAGA  
 ACTACCTCTTTCCCTGAATGACACGTCTATCTCCGATTTAGAATTTGCCACTTTCCATGTTG  
 GAAGCCAAATGTTGAAGAAATACTAAATGAATCTGTTAACCATTCTGGTTCACTTGCCGTC  
 GTATGTTGCGGACCACCTATTTCTGTCGACACCGCTAGAAATCAAACGCAAAAGCTGTTAT  
 CAGAAACCCATCAAGAATGATTGAATACTTGGAGGAATACCAAGCCTGGTGA

>YKR105C 0.75 Cold

ATGGAGGAAACTAAGTACTCTTCGCAGCAGGAGATAGAAGGAGCATGTGGTTTCAGACGCTTC  
 ATTGAATGCTAGAGGTAGCAATGATTCTCCAATGGGACTTTCCTTGTACCTCTGCCTGGCTT  
 CGTTAACTCTTGTACTATTCCATAACTGCACTGGATATTTTGATAGTGGGAACATATTATGAC  
 GTGGTTCGCAGAACAGTTCGGAACTACTCCAAAACAGGTTGGCTCGTTACAGGCTACAGTTT  
 ACCAAATGCTATTCGAGTCTCATTGGGGAAGATTTCGCATCTATCATAGGTTTCCAGCATA  
 GTCTCATTTTAGCAATACTTATTTTTGAAGCCGGATCCCTAATTGCTGCCCTTGCCCTTTCA  
 ATGAATATGCTCATTTTCGGTAGAGTTGTTGCTGGTGTGGGGGAAGCGGACTCCAAACGCT  
 TTGCTTTGTTATTGGTTGTACGATGGTTGGTGAAAGGTCACGTCCATTGGTGATTTCCATCC  
 TAAGTTGTGCATTTGCTGTAGCTGCTATCGTTGGTCTATAATCGGAGGTGCCCTTTACAACC  
 CATGTTACCTGGAGGTGGTGTCTATATCAATCTTCTATCGGTGGTCTTGCCATTATTAT  
 GTTTTTACTCACCTATAAGGCCGAGAATAAGGGTATACTTCAACAAATTAAGATGCTATAG  
 GAACAATCTCGAGCTTTACTTTTAGTAAGTTCAGACACCAAGTTAATTTTAAAGACTTATG  
 AATGGCATAATCTTCAAGTTTGACTTCTTTGGTTTTGCCCTCTGCTCTGCAGGGCTGGTCCT  
 TTTCTACTGGGGCTAACCTTTGGTGGTAATAAATATAGTTGGAACCTTGCCAAAGTCATCA

CATATTTGGTTTTGGGTGTCTTACTTTTTATTTTTTTCATTGGTGTACGATTTCTTCTTATTC  
 GATAAATTC AACCCGGAACCTGATAATATATCCTACAGGCCCTCCTTCTAAGAAGATTGGT  
 AGCAAACCAGCCATAATAATAGTAAACATGGTAACATTTCTATTATGTACCGTTACAATG  
 GGCAAATGATATACTCTGTCCAGTTTTTCCAACCTATATTTGCGTCGAGTGCATGGAAAGCC  
 GGTCTTCACTTGATACCAATCGTTATTACCAACGTTATTGCGGCCATTGCAAGTGGTGTGAT  
 TACCAAAAAGCTCGGTTTAGTTAAACCACTCTTAATATTTGGAGGCGTCTTGGGGTAATTG  
 GAGCAGGGCTTATGACACTTATGACAAATACGTCCACGAAGTCAACTCAAATGGTGTTTTG  
 CTATTACCGGGGTTTTCCCTTGGATTTGCTCTACAAGCATCGCTCATGAGTGCACAGCTTCA  
 AATTACCAAAGATCGTCCAGAAGCTGCTATGGACTTTATTGAAGTAACAGCTTTCAATACAT  
 TCATGAAGTCATTAGGTACAACCTCTTGGTGGTGTGCTTTCAACCACTGTTTTTTCCGCCCTC  
 TTTTACAATAAAGTATCACGAGCTCATCTAGAGCCTTACGAAGGAAAAACGGTTGATGACAT  
 GATTTTGTATCGTCTTCAAACCTACGACGGTCTCATTTCGACTATTGGAAACATTTTAAAGCG  
 ACTCCATTAAGAACGTATTTTGGATGGATCTAGGGTTTTATGCCTTAGGATTTTTGTTTTGT  
 AGTTTTTCATCCAATAAGAAATTAATCATACCAAAAAGGACGATACACCAGAAGATAATTT  
 AGAAGACAAGTAG

>YOL141W 0.71 Cold

ATGAAGAATCTGACCACTATAAAGCAAACGAACAAGAATGTCAAACAAGAAAGACGTAAAAA  
 GTACGCTGATTTGGCGATTCAAGGCACAAAATAACTCCTCAATTGCTTCTAAAAGATCGGTAG  
 AGTTATTGTATTTGCCAAAACCTGAGTTCCGGCTAATAATTTCCAAATGGATAAGAATAATAAA  
 CTGTTGGAATATTTTAAATTTCTTGTTCCTAAGAAAATTAAGAATCTCCCTGTATTAACAG  
 AGGTTATTGGTTGAGGTTATTTGCCATCAGGTCAAGATTGAACTCCATCATTGAACAAAACGC  
 CACAGGATAAAAAAGATAGTTGTTGTTAACCTTGGTTGTGGGTACGATCCATTACCATTTCAA  
 CTATTAGACACCAATAACATACAAAGTCAACAATATCATGACCGAGTTTCTTTTATTGATAT  
 TGATTACTCTGATTTATTGAAAATTAATAATGAGTTGATCAAACTATAACCCGAGCTTTTGA  
 AAATTTATTGGTCTTTCTGAAGATAAAGATTATGTTGATGATAGTAATGTTGATTTTTTTGACT  
 ACTCCAAAGTATCTCGCCCGACCATGCGACTTGAACGATTCTAAGATGTTTACGACATTGCT  
 AAATGAGTGTCAATTATACGATCCAAACGTTGTCAAAGTATTTGTTGCTGAAGTATCACTGG  
 CGTATATGAAGCCGGAGCGTTCTGATAGTATAATCGAGGCAACTTCTAAGATGGAGAATAGT  
 CATTTTATTATTCTTGGAGCAGTTGATTCCAAAGGGACCTTTTGAACCTTTTCTAAGCAGAT  
 GCTAGCTCATTTC AAGAGAAATGATTCTCCGTTACAGTCTGTATTAAAGTATAATACTATCG  
 AGTCACAGGTTCAACGATTCAATAAGTTAGTTTTCGCTTACGTTAACGTGGGTGATATGTTT  
 CAACTGTGGGAAAGCGCAGATGAGGCAACCAAGAAGGAACTTTTAAAGGTAGAGCCTTTTGA  
 TGAAGTAGAGGAGTTCCATTTATTTTGTATCATTATGTTTATGCCACGCTACGAACTATA  
 AAGAATTCGATTTACTCAAGGTTTTTTGTTTACAGATCAATATCTGAGATAAACCTAACT  
 GTGGATGAAGACTATCAGCTTCTAGAATGCGAGTGCCCATCAATAGAAAATTTGGCGATGT  
 AGATGTCGCTGGAAATGATGTGTTTTTACATGGGAGGTAGTAACCCATACAGAGTAAACGAAA  
 TATTACAGATGAGTATACACTACGACAAAATAGACATGAAGAATATTGAAGTAAGCAGCAGC  
 GAGTTTCTGTAGCAAGAATGTGTCACACTTTTACAACCTATTTCTAGAAAATAACCAGCTACT  
 GCTTATTGGAGGTAGAAAGGCACCACACCAAGGTCTCTCTGATAATTGGATATTTGATATGA  
 AAACAAGAGAGTGGTCGATGATCAAGAGTTTATCACACAGAGATTCAGACATAGTGCATGT  
 AGCTTACCGGATGGAAACGTCCTGATCCTTGGTGGGGTTACAGAAGGACCTGCCATGCTGCT  
 ATACAATGTCACCGAAGAAATCTTCAAAGACGTAACCTCAAAGATGAATTTCTCAAATTT  
 CGCTAGTATCAGCGGGTCTAGAATTTGATCCGGTTTTCAAACAAGGCATAATATTGGGTGGT  
 GGATTTATGGATCAAACAACCTGTCTCGGACAAGGCAATTTATTTCAAATATGATGCGGAAAA  
 TGCTACTGAACCAATTACGGTGATTAAGAAGCTCCAGCACCCCTTATTTCAACGTTATGGAT  
 CCCAGATAAAAATACATTACTCCAAGAAAGCTATTAATAGTCGGTGGAAACAAGTCTTCCGGG  
 CTATTTGACCGGACCAACTCTATAATCAGCCTTGATCCGCTGAGTGAGACGCTAACATCAAT  
 TCCCATATCAAGACGCATATGGGAAGATCACTACTAATGCTTGTGGATTTAGTTTTGGTGT  
 CCACTTCTATGGGCACCATACATATCATTGGAGGCGGTGCCACTTGCTACGGCTTTGGATCA  
 GTGACTAATGTAGGTTCTAAGCTCATAGCAATCGCGAAATAA

>YNL330C 0.77 Cold

ATGGTATATGAAGCAACACCTTTTGATCCGATCACGGTCAAGCCAAGCGATAAAAGACGCGT  
 TGCATATTTTTACGATGCAGACGTTGGGAACTATGCATATGGAGCAGGTCACCCGATGAAGC  
 CGCATAGAATAAGAATGGCACATTTCCCTTATTATGAATTATGGCTTGTACAAGAAGATGGAA  
 ATTTACAGAGCTAAGCCGGCAACGAACAAGAATGTGTCAGTTCATACTGATGAATACAT

TGATTTTTTATCGAGGGTACTCCAGATAATTTAGAAATGTTTAAAAGAGAAAGTGTCAAGT  
 TTAATGTCGGAGATGATTGTCTGTCTTTGATGGGCTCTATGAGTACTGTAGCATATCTGGT  
 GGTGGCTCTATGGAAGGAGCTGCTCGTCTGAATAGAGGCAAATGTGATGTTGCTGTCAACTA  
 TGCGGGTGGTTTGCATCATGCAAAAAAATCGGAAGCTTCTGGGTTTTGTTATTTAAATGACA  
 TAGTACTGGGCATTATTGAGCTACTACGATACCACCCAGAGTTCTGTATATTGATATTGAT  
 GTGCACCATGGTGTGTTGTTAGAGGAAGCGTTTTATACAACGGATCGTGTGATGACATGTTT  
 TTTCCACAAATATGGTGTGAGTTTTTCCCTGGCACAGGTGAACTGAGAGATATAGGGGTGGGTG  
 CAGGAAAAAATACGCGGTCAATGTGCCATTAAGAGACGGTATTGACGATGCTACGTATAGA  
 TCTGTGTTTGAACCTGTGATAAAAAAATTAATGGAATGGTATCAACCTTCTGCTGTGCTGTT  
 ACAGTGTGGTGGGGACTCCTTGTCCGGCGATCGTCTTGGTTGCTTTAATCTTTCCATGGAAG  
 GCCATGCTAATTGTGTAACCTATGTGAAATCCTTTGGGATCCCAATGATGGTGTGGTGGGA  
 GGAGGCTATACTATGAGAAATGTTGCAAGGACATGGTGTCTTGAACAGGTCTACTAAATAA  
 CGTTGTCTTGGATAAAGATTTACCGTACAATGAATATTACGAATATTACGGTCCAGATTATA  
 AGTTAAGTGTAGACCTTCGAATATGTTCAATGTAAATACTCCCGAATATCTTGACAAGGTA  
 ATGACCAATATATTGCTAATTTGGAAAACACAAAGTATGCCCTAGTGTTCAGTTGAATCA  
 CACACCTAGGGATGCCGAAGATTTGGGTGATGTTGAAGAAGATTCTGCCGAGGCTAAAGATA  
 CGAAGGGTGGTTCGCAATATGCGAGGGACCTACATGTTGAGCATGACAATGAATTCTATTGA

>YOR372C 0.79 Cold

ATGGACAGAGATATAAGCTACCAGCAAAATTATACCTCAACTGGGGCAACTGCAACTTCCTC  
 AAGACAGCCCTCTACGGACAATAATGCAGATACAAATTTTTTGAAGGTAATGTCAGAATTCA  
 AATATAATTTTAAACAGTCCGTTACCTACAACGACTCAATTCACCACGCCCTATTCTTCTAAT  
 CAGTATCAACAGACTCAAGATCATTTTTGCCAATACAGACGCTCACAACAGTTCGAGCAACGA  
 ATCGTCTGTTGGTAGAGAACAGTATATTACCGCATCATCAGCAGATACAAACAGCAACAACAAC  
 AACACAACAACAACAACAACAACAGCAAGCTCTAGGTTCACTTGTACCTCCTGCTGTCACA  
 AGGACAGATACAAGTGAGACTTTGGACGATATCAACGTTCAACCTTCTTCTGTTTTGCAGTT  
 CGGCAACTCTTTACCCAGCGAATTTTTGGTTGCATCCCCAGAGCAATTCAAAGAATTTTTGT  
 TGGACTCTCCGTCCACCAATTTCAATTTCTTTTACAAAACCTCCGGCAAAGACACCACTTCGA  
 TTTGTAACAGATTCTAACGGTGTCTAGCAAAGCACCACAGAGAACCAGGTCAACAACAGAA  
 TGTTTTTAGCAATGTCGATTTGAACAATCTTTTGAAGAGTAATGGAAAAACACCCTCATCTT  
 CATGCACCGGCGCATTTTTACGCACTCCTCTGAGTAAGATTGACATGAATCTCATGTTCAAT  
 CAACCGCTGCCGACATCTCCATCAAAAAGGTTCTCCTCCCTGTCGTTGACACCATATGGAAG  
 AAAAATTTGAAATGACGTCCGTACACCTTATGCAAAGCATTGATATCGTCTAACAGCGCGT  
 TAGTGGATTTTTCAGAAGGCAAGAAAGGATATTACCACTAATGCAACATCCATAGGGCTGGAA  
 AATGCCAACAACATCTTACAGAGAACGCCGCTAAGATCTAACAATAAAAAATTTATTTATTA  
 AACCCCCAGGATACCATCAATAGCACTAGCACACTAACTAAGGACAACGAAAATAAACAGG  
 ACATATACGGCTCTTACCGACTACCATCCAATTAATTCATCAATAACTAAATCTATCTCC  
 AAATTTGGATAACTCTAGAATTTCCCTTGTAGCTTTCGAGATCAGATAACATTTCTGGATTCAA  
 TGTGGATGACCAATTTGTTTGTATTGGGGTTGACAAGATTACCTTTATCACCAACACCAAAT  
 GTAATTTCTTTGCATAGTACAACCACAGGTACATCTGCCTTACAAATTCCTGAGCTACCCAAG  
 ATGGGGTCTTTTAGAAGTGATACGGGAATCAATCCAATTTCAAGTTCAAACACAGTTTCTTT  
 TAAGAGCAAATCAGGCAATAATAATTCAAAGGGTTCGAATCAAAAAAATGGGAAGAAACCTT  
 CCAAATTTCAAATATTGTTGGCAAATATTGATCAATTTAACCAGGATACATCATCGTCATCT  
 TTATCATCATCATGAAATGCAAGTTCGAGTGCAGGGAATTCAAATTCAAACGTAACAAAGAA  
 AAGAGCAAAGTAACTCAAAGATCACAGTCTTACTTTCTGATTCCGGATCGAAATCACAAAG  
 CAAGGAAAAGCTGTAATTTCTAAATCTAATGAAATTTATTCAATTCACAGTAA

>YPL214C 0.8 Cold

ATGGTATTTACTAAGGAAGAAGTTGATTACTCATTATATCTGGTTACAGATTCTACCATGCT  
 TCCACCGGGAACACTTTTATGTTCTCAGGTTGAAGCTGGGTTGAAAAATGGTGTAAACGCTAG  
 TTCAAATCCGTGAAAAGGATATTGAAACAAAAAATTTGTTGTCAGAGGCTTTAGAAGTTCAA  
 AAAATATGTAAGAAGTACAATGTTCCACTTATTATCAATGACCGTATAGACGTCGCTATGGC  
 AATTGACGCCGATGGGGTTCATGTGGGCCAGGACGATATGCCAATCCCAATGGTAAGAAAAC  
 TTTTGGGCCCTTCTAAAATTTCTGGATGGAGTGTGGTAAACCTTCGGAGGTAGAGACATTG  
 GCTAAATGGGGGCCAGATATGGTAGATTATATTGGTGTGGTACTCTTTTCCCTACATCAAC  
 AAAGAAAAATCCTAAGAAATCACCCATGGGTCCCTCAAGGCGCCATTGCCATTTTGGATGCTT  
 TGGAGGAATTTAAAGCTACATGGTGTAGAACCCTGGTATTGGTGGTCTTCATCCTGACAAAT

ATTCAACGTGTGCTTTGTCAATGTGTTGCTTCAAATGGAAAGAGATCGTTGGATGGTATCTC  
TCTAGTCAGCGATATTATGGCCGCTCCAGATGCATGTGCAGCAACCAAGAGTTGAGAGGCT  
TGTTAGATGCTACCAGATACCAATTTGTTGAGTGCAGTTAAATAATACATTTCCGACCACA  
ACTTCAATTCAAAACGTTATATCTCAAGTATCAAACAATCGTCCATTAGTGCAACATATCAC  
CAATAAGGTTTCATCAAATTTTGGTGCCAATGTCACTCTAGCTTTAGGCTCATCTCCTATCA  
TGCTCTGAAATTGAAAGTGAAGTATCTGAACTAGCAAGAATCCCAAATGCTTCTTTACTGTTA  
AATACCGGATCAGTGGCACCTATTGAAATGCTAAAAGCCGCAATTAATGCTTATAATGAAGT  
AAATAGACCCATCACCTTTGACCCGGTCCGGTACAGCGCCACTGAAACAAGGCTCTGTCTAA  
ACAACACTTTGCTCACTTACGGCCAATTTGCTTGTATAAAAGGGCAATTGCAGTGAATACTG  
TCTCTAGCCAAGTTAAATAACCATAAAATGAAGGGCGTCTAGCAGCGGCAAAACGAA  
CATCGACACACTTGTGCGCGCTACACAAATTTGTCGATTCCAATACAGGACTGTTGCTGTTT  
GCACGGGTGAGTTTGATTGCGTTGCTGATGGTACTTTTGGAGGCGAATACAACTTTTCATCA  
GGAACAGAAGGAATAACCGCTGAAGATCTTCCATGTGTAATAATTGAAGATGGCCCAATTC  
TATCATGGGTGACATCACTGCAAGTGGATGTTCACTTGGTCTACAATTGCTTCTTTATCG  
GTGGGTTAGATTCCACTGGAAAACGTTTGGATGCTGTGGTGGTGTCTTATTATACAAA  
TCAGCTGGTAAGTTGGCTTCCACCCGTTGTCAAGGAAGTGGTTCATTCCATGTGCAATTGAT  
TGACGCATTATATCAATTATTCCATGAAAATAAACAGAAAAGTGGTCCGCTTCTTTGAAGA  
AATTCAAATAA

>YGL228W 0.81 Cold

ATGGGAAAGCTGATAAAGTTAATCACAACTCTGACGGTGTGGTATCGTTGCTTCACTACTG  
TTGCGAATTCAATAGTGGGAGCATATCGTGTGAACGCACGCAAACGCTTTGCCATTATACCA  
ATCCAAGAGTCTGGAACACCTACTTTTCAAGAAATTGTGAATTATACAAAAATAAAGTTAGT  
CCCGTTTTGATATAGTGGCGGTAAATATGACACGGCTGTCAAACCTGTCATCGATGACGC  
TACAGTAAAAGTGAACAAGGTCGTATACAGCCTGCATTCAAGGTCATCCATTCACAATGTA  
AGAAATGGAACCTGTGGAAAGTATTACCAATTGGTCCGCTCCCAATGGTCAAGACTAGACGA  
TTTTTCTTCGCAAAATACAATGCTTTTGTGAAACCTAACTTAGACAAATCTTTACTGCGGA  
GTTTCGCTCTCATTTGAAGGAAAGAATTTTAAAGTATAAAAAATATAGGCCATTATTACTTTA  
CTATCACTTCAAGATGCATCAAATCCAAATACGACTTTTATTGTTGGTAATACAGAGGAAAA  
TTAATGGGAAAGTCAAGAATAAGGACACGCATGGCATTTCATGGTTCTGTACACGTTGAGCC  
TTCTTCGGAGGACATGGTTTTAACCGTAAGTACTATGGAGTCTGACGAAGAGGAGCTAACTA  
CAACAAGTACTCAAACAGTGGTTGAAACAATTACTTTGGACCAGGAAGAGGCTAGCGCTGTT  
GCTAATCATGCGCAGCAGATGAGGCTTCCACAGACGTTGAAGGCTCCACAGACGTCATGT  
CAATGAACAGGCTCTGTTGCAAGAGGATTTTGCATGTGGAGTGAGACTATATTGCAGAAA  
CACAAGACGTCATACAGCTATTTGAAAAGGATGTTTCCAAATACATCAATGGTAAATTGGTT  
GAGGAGGCCAACCATTTTTAAAGCCAAGTTTCAATCTTTAGATGATAAATCTAAGAAGTTCTT  
CTCCAAGATTTTCGCTAGCCATTAACGATATTGAATGTGTGGAAGGCATTGATAGTGAACCTG  
GCAAGAAAATTTCTTCGATAAATCTGGAAGTACTGAGATTTCTCAGTACATAACGAGAGAG  
TTAGTTCTGTGAGTACTTCAACGAGACGCGCTCGACGTTAGACGAACTGACAAATGCTATGGA  
GAAAGATTTGAGCGAAATCACTGATGAAATTGAAAAAAAAGTTAATGCAATTAGAGAGGAAA  
ACGTCGAGGTATTTGAAGAATGGGGTGATATCATTGTAAATGAATGGTCCAAAAGAATGGCT  
TATGTGGATGTTATCAACGCTCACATGGGTGCAGATGATGACACTACGCTTGATGAAGAGAA  
AGCAAAGTCTTCTGTTAACTGGAAGAAGTTTTTGAAGGGCAAGAAACAGATCATAGAATCTA  
GAGACAAGCTGGCTCACCATTCCGCTGACTTATCCCGTGTAAACGCGTTTAGGCAAAAAGTG  
CAAAAGAAGATATTATCGTTCACTCAAGAGAGTGGTGGTGGTGGTGGTGGTGGTGGTGGTGG  
AGCCAACCTGCAATTTCAAGAACGTTGAAAGAAAGGAACGTTGAAAGAAAAGAGCGTGA AAAAG  
CTGCAGCAGAAGAGTTCCAAAGGCAGCAGGAGCTATTACGACAACAGGAAGAAGAAGACGAA  
GAAGACGTATCTACACCTCTACTTCGACCATCACCAACCATTACCATGACATTGTGA

>YGL111W 0.79 Cold

ATGAGGTTACTAGTCAGCTGTGTGGATAGTGGATCCATAAAGGAAGTTTTGTGTAACATCGG  
GACTGACACTTCCGTACAATCAGCACTGCAGCCTTTTCATGTGGCACCTCATCTAGCCGAAG  
GATTGAAAGCTTACGTTGACAGGATGTGGGTGATATCCGAAGATGAAGCCATCTTAGCAAGG  
AATTCAGGGGTGTCGAACTTGTAAAGATTTTCGAAACACCTTAAAGAAAATGAAGCTCTCCA  
GGTCGATCCCAAAGGAGAAAAGCAAAAATGAAAAGAGCCTTTCCGATGATCTACCCAAATTTG  
ACATATCCGAGTTTGAGATAACCAGCTCAGTTTCAGACCTTTTGGATGATGCCAAATTTGAA  
TCACTTTCAAGTAAATCTGTTAAAAGAACCAAGTTGGTGGATGGTTTTGTACATTATGTCC

CATAAAAAAGGATTCGTCGAATAACACATTCGTAGCTGCTACCAAATCGGGATTATTACATA  
 TTATAAAAAAAGGAGAAGATAAAAAGTTAATAAACTAGCATCCCTTGGACTGAAAGCACCA  
 GTAGAATTTCTTCAGTTATATGATCTAGAAGATACCGATACTGATAAATATATATTTGCATA  
 CGGAGGGGAGGAGAATTTAATAAAAATTAGTGGAAATAGATTTCGAGTTTCCAATCTTTAAAGC  
 AAATTTGGGAAGCCAAGAATGTTAAAAACGACAGGTTGGATATGAGAGTCCCAGTATGGCCC  
 ATGGCCCTAAGATTTTTGGAGCCCTCCCCTGGTAAAACGAAAAGGGTAAGCTGAACTACCA  
 GTTTCGAGCCATAACCCGTTGGTCCCACCTACCAAATACAGCACACAACATGGCAGAAAAC  
 CGTTCGCTCAGATAGATTTATTACCTAACCGTGAACCATTATCTCAGATGGAAGTTTTTGAT  
 GCCAAGGGAGAAAATGTTGTCTCTTCGTTGGGGAATTTTCAATCTGAAACCTTTAATGAACT  
 GAATGTGATTACTACTGACTACAAAAGAATGTTTTTAAATTCGATGGTAATGGAAGAATGT  
 TGGGCAAGGTGGGTAGAGATGATATCACTGGTTCGTCAACCTATATTCATGTACATGACGGC  
 AAATATCTTTTACAAGGTGGTTTAGATAGGTATGTTCCGGATCTTCGATATAAAAACTAACAA  
 AATGCTGGTGAAGGTTTATGTTGGGTCCCGTATAAATTTTATTGTTATGCTGGATGACGTTG  
 AAATCGAGATGCCACTAAGTCCAAGTGCAGAAAGCTGCCAAAGGGAAGCAAAAAGGAAGGTT  
 ACAGAACTTGAAGAAGACGCAGATGAGCTTTGGAATAAATTTGGAGGGAAAGGTAGCTGCTTC  
 TAAAGCCAGTAAGAAAAGCAAAAATTTAA

>YKL078W 0.74 Cold

ATGGCAGCAAATAGCAATAGTAGAGTTGCATCAAACCATACTTCTAAAAAACAAAAGGTTAG  
 GAGGAATATACATCCATTCACGAATAACACTCGGATTAAGAGCTAGTAAAATCGTAAAGT  
 TTAATGATTCAGGCGAGGGCGACCATGTTTCAGACCAACGTTTCGAACAAGGAAAATGTCCTT  
 ACTTATAAATCTTTGAAAAGTCGGGCAAGCGATTTACTCAAAAATGAGAGAAACACTTCCCCT  
 TTACCAACACAAGCGAGAAATAATGTCATATATTGAAAGCAATCCCCTTACCGTCCCTTATTG  
 GTGAAACAGGTTCTGGTAAATCAACACAAAATTCGCAATTCGTATTAGAAAAATTATATGAT  
 ACGAAGAAGCATGGGTGCGATTGCTGTAACCTCAACCCCGTCGTGTTGCGGCCATCAATTTGGC  
 TACACGTGTTGCTCAAGAACATGGTTGCAAACTGGGTGAACAAGTAGGTTATTCTGTCAGAT  
 TTGACAATACGACTACTACAAGAACAAGACTTAAGTATCTGACTGACGGTATGTTACTTAGA  
 GAACTTATGATGAATAGTGACCTTAGAGAATACAGCGTCATCGTTATCGATGAAGCGCATGA  
 AAGAACTGTGCTTACAGATTTGATATTGGGGTTCTTAAAAATCCTTGATACAAGGGCCAAGAC  
 CTGATTTGAGAATAATTGTTATGCTGCAACATTCGAAGCCGAAAAATTTAGTGAGTTCCTC  
 AATAATGCCCCAATCTTATTTGTAGAAGGAAGAAAATTTGATGTCAAACAATACTACTTGAA  
 GCGCCAACAGATGATATAGTAGACGCTGTCATCAGGTGTTGTATACAAATAAACCAAGGTG  
 AAGAACTGGGAGATATCTTATGTTTTTTTACCGGGCCAAGAAGAGATTGACAAAGCAGTGACT  
 ATAATGGAGAAAATTTGCAAAGTATGTTTCAGATGAGGCCCCAGTACCATTAATAGTTCCTTA  
 TCCTTTATATGCAGCTCTTCCCAGGTTCCAACAGTCTTGGTCTTCGCTCCGATAAAGGTT  
 TCAAGAGAAAAGTCGTCTTTAGTACCAATATTGCAGAAACATCTGTTACCATATCCGGTGT  
 AAATTTGTGCGTTGATTCTGGTCTTCGAAAAGTCAAAGTTTGGAGACATCAGCTGGGATTAGC  
 CACTCTACTTACCGTACCCATTTCTCAGGCAAGTGCAGATGCAGAGAAGTGGTCTGCTGGTA  
 GAGAAAGTGAAGGAAAGAGTTTCAGGCTTTATTTGTGAGTCTGATTATGTGAAATTACCTAAA  
 CAAAGTGAACCTGAAATAGCCAGAAGTGACGTCACATCTCCTGTGTTAATGTTGAAGAGATA  
 TGGTGTGATGACCTGCTAAACTGGACCTGGTTTTGAGAACCCTGGAAAGGAAGCTATAGTAA  
 TGGGGCTTCAGGAACCTTTATGAATTGGGTGCTCTTGACACTCGTGGAAAGATAACTAAACGG  
 GGTCAACAAATGGCTCTGTTACCGCTACAACCGCATTTAAGTAGTGTCTTAATTAAGCCAG  
 TGAAGTCGGATGTTTGTGAGTCAGGTCATTGATATCGTCTCTTGCCTTAGTGTGAAAAATTTAC  
 TGTGTAATCCGTCACCAGAAGAAAGAGATGAGGTGAACGAGCGTCGTTTGTCTTATGCAAC  
 GCTGGTAAAAGGTATGGTGACCTTATCATGCTGAAAGAGCTTTTTGATATCTATTTCTACGA  
 ACTAGGGAAAAGTCAAGATGCAAGCTCTGAAAGAAATGATTGGTGTAAAGGATTGTGTATTT  
 CGATACGTGGGTTTAAAAATGTAATTCGTGTCAGAGACCAGTTAAGAGTTTATTGTAAGCGT  
 TTGTTTTCTTCAATCAGTGAAGAGGATGAAGAATCCAAAAAGATTGGTGAAGATGGCGAGCT  
 AATTTGAAAAATTTTAAAGTGTTCCTTAACTGGGTTTATCAAGAATACAGCTATAGGGATGC  
 CAGACAGGTCTTATAGAAGTGTTCCTACTGGAGAGCCGATAAGCATTATCCATCATCTATG  
 CTATTTATGAATAAAAGCTGCCCCGGTATAATGTACACGGAGTATGTCTTTACTACGAAGGG  
 ATATGCCAGAAAATGTTAGTAGGATTGAACTTTCATGGTTACAAGAAGTTGTCACCTAATGCAG  
 CCGCTGTAGCAAAGCAAAAAGTTTCTGATTCAAATAA

>YKL207W 0.74 Cold

ATGTTATTAGATGACCAGCTGAAGTATTGGGTCCTGTTACCTATTTTCGATTGTCATGGTTTT  
 GACGGGTGTAACAAACAGTACATCATGACACTTATAACGGGAAGCAGTGCAAATGAAGCAC  
 AACCAAGGGTAAAGTTAACTGAATGGCAATATCTACAATGGGCACAATTATTGATTGGAAAC  
 GGTGGGAACCTGTCCTCCGATGCATTTGCTGCGAAGAAGGAATTTCTAGTTAAGGATCTCAC  
 TGAGGAAAGGCACCTAGCCAAGGCCAAGCAGCAGGATGGTTCGCAAGCTGGAGAGGTTCCCTA  
 ATCCCTTCAACGATCCAAGTATGTCTAATGCTATGATGAACATGGCTAAGGGTAATATGGCC  
 AGTTTCATCCCTCAAACCTATTATTATGTGGTGGGTGAACCATTTTTTTTGTGGATTTATCT  
 TATGCAACTACCTTTCCCTTTGACTGCCAAATTCAAAGAGATGTTACAGACCGGTATTATCT  
 GTCAGGACCTGGATGTGAGATGGGTAGCTCCATTTTCATGGTATTTTATTTCTGTGCTCGGG  
 CTAATCCAGTCTACAACCTGATTGGGTAAACGATCAGGACATGGGTATTCAGGCCGGGAT  
 AGGTGGCCCTCAGGGCCCCAAGGCCCTCCACAATCACAGGTTGACAAAGCAATGCATGCGA  
 TGGCTAACGATTTGACTATCATTCAGCATGAGACTTGTCTTGATAACGTTGAGCAAAGGGTT  
 TTGAAACAGTATATGTAA

>YIL028W 0.79 Cold

ATGGACGATGCAAGGTTATTCAGACGCGTTGTTTGTATGCCATTTCCAATGATAATGTTGGT  
 TGCGTTATATAGAAATGTGTTAGGAAGAGATTCTACAGTTGATTGCAGCTTTGACGTTATAC  
 TTACACCTTGATAATGGCCAGTATGTTTTCCAAACGATGGTGAATTGGTCTAATCCACGT  
 CAAGCTGTTTTAAAAGTATGCAGCGCAGCCGTGACCTCCCGGATAGTTGCCAATTGGTTGTT  
 TACGATGAACATATTATATAACAGTGGTGAAGGGTTTTTACTCGCTAGCAACAGCTGTGG  
 TAATTAACCGTCACTGATGGGTTTACGGTGATACGGGTTTTCTCTATTCACCTGAACGAG  
 TCAGTATATAGCAAGCCATTACCATAA

>YBR294W 0.71 Cold

ATGTCACGTAAGAGCTCGACTGAATATGTGCATAATCAGGAGGATGCTGATATCGAAGTATT  
 TGAATCAGAATACCGCACATATAGGGAATCTGAGGCGGCAGAAAACAGAGACGGACTTCACA  
 ATGGTGTATGAGGAAAATTGGAAGGTTAATAGTAGTAAGCAGAAATTTGGGGTAACGAAAAAT  
 GAGCTATCAGATGTCCTGTACGATTCCATTCCAGCGTATGAAGAGAGCACAGTCACTTTGAA  
 GGAGTACTATGATCATTCTATCAAAAACAATCTAACTGCGAAATCGGCAGGAAGTTACCTCG  
 TATCTCTTTTTTCTATTATAAAAATGGTTTTCTCATTATAACTTTTACGTGGGGCTATGCTGAT  
 TTAGTGGCAGGAATTACAGTTGGCTGCGTACTCGTGCCCAATCTATGTCATACGCACAAAT  
 CGCTAGTTTTATCTCCTGAATATGGTTTTGTATTCCCTCCTTTATTGGTGCGTTTTATATATTCTT  
 TGTTTTGCCACATCGAAAGATGTTTTGTATTGGTCCGGTCGCTGTAATGTCACTACAACTGCC  
 AAAGTCATTGCTGAAGTTCTAAAAAATATCCCGAAGACCAGACAGAAGTTACAGCTCCTAT  
 CATTGCAACTACCTTTTGTGTTTTGTGGGATTGTCGCCACTGGGTTGGGTATACTGCGTT  
 TAGGCTTTTTTAGTGAACCTTATTTCTCTAAATGCTGTTGCTGGCTTCATGACCGGTTCCGCA  
 TTTAACATCATCTGGGGTCAAATTCGGGCTCTCATGGGATACAACCTCATTAGTGAATACCAG  
 AGAAGCAACGTATAAGGTTGTAATTAACACTCTGAAACATTTACCAAACACAAAGTTAGACG  
 CCGTTTTTGGCTTGATTCCGTTGGTAATCCTCTATGTATGGAAATGGTGGTGTGGTACATTT  
 GGTATAACTTTGGCAGATAGATATTATCGAAATCAACCAAAGGTAGCAAATAGACTGAAATC  
 CTTCTATTTCTATGCACAAGCTATGAGAAATGCCGTCGTCATAGTAGTTTTTACTGCCATAT  
 CGTGGAGCATAACAAGAAACAAATCTTCAAAGACCGTCCAATCAGTATTTCTGGGTACAGTT  
 CCTCGGGCTTAAATGAGGTGGGAGTTATGAAAATCCAGACGGTCTGCTATCTAATATGAG  
 TTCAGAAATACCTGCTTCAATTATCGTTCTGGTGTGTAACACATCGCTATTTCAAATCCT  
 TTGGTAGAATTAACGACTACAAGGTTGTCCCTGACCAAGAACTTATTGCGATTGGTGTGACA  
 AATTTGATAGGGACATTTTTTCACTCATATCCAGCAACTGGGTCATTTTCCAGATCTGCTTT  
 GAAAGCAAATGTAACGTGCGCACTCCGTTTTCTGGGGTATTCCTGGCGGTTGCGTTCTAT  
 TAGCACTTTATTGTTTAACTGACGCCTTCTTTTTTCACTTAAAGCGACACTATCGGCGGTT  
 ATTATTCATGCTGTTTCTGATTTGCTGACTTCTTACAAAACCACCTGGACCTTCTGGAAGAC  
 CAACCGTTAGATTGTATCTCATTTATCGTTACAGTGTTCATCACAGTATTTTTCATCCATTG  
 AAAATGGTATATATTTTGAATGTGTTGGTCAATGTGCAATGTTACTATTGAAACAGGCTTTC  
 CCTGCTGGTAAATTCCTTGGTCTGTTGAGGTGGCAGAAGTATTGAACCAACAGTACAAGA  
 GGATATTGATGCTGTGATATCATCTAATGAATTACCTAATGAACTGAATAAACAGGTTAAGT  
 CTACTGTTGAGGTTTTACCAGCCCCAGAGTATAAGTTTAGCGTAAAGTGGGTTCCGTTTCGAT  
 CATGGATACTCAAGAGAATTGAATATCAATACCACAGTTCGGCCTCCTCCACCAGGTGTCAT  
 AGTCTATCGTTTTGGGTGATAGCTTTACTTACGTGAACTGCTCAAGGCATTATGACATTATAT  
 TTGATCGTATTAAGGAAGAAAACAGGCGAGGCCAACTTATAACCTTAAAGGAAAAAGTCAGAC

CGTCCATGGAATGATCCTGGTGAATGGAAAATGCCAGATTCTTTGAAATCACTATTTAAATT  
TAAACGTCATTCAGCAACAACGAATAGTGACCTACCGATATCGAATGGAAGCAGTAACGGAG  
AAACATATGAAAAGCCGCTACTGAAAGTCGCTGCCTGGATTTTTCCCAAGTTGCTCAAGTG  
GATTC AACCGCTGTTCAAAGCCTGGTTGATCTGAGAAAAGCTGTGAATAGGTATGCGGATAG  
ACAAGTCGAATTCATTTTTGCCGGAATTATATCTCCATGGATCAAAAAGAAGTCTTTTTGAGTG  
TTAAATTCGGAAC TACAAATGAGGAATATAGTGACGACTCTATTATCGCTGGCCATTCTAGT  
TTTCACGTTGCAAAAAGTTTTGAAGGATGATGTGGATTATACTGATGAAGACAGCCGTATAAG  
CACATCTTACAGTAACTATGAAACATTATGTGCTGCAACTGGGACAAATTTACCGTTTTTTC  
ATATCGATATACCCGATTTTTTCTAAATGGGACGTTTAG

>YER060W 0.79 Cold

ATGCCTCAAACGCACGAAATGTCCTGAACGGCACTCAATACTTAAAAATATGAACTTAAAGA  
CCTTGAGTCTCGAGCTCACGATGCAAAGACTCCTTCAACAAATGAATTCATGATGATGTAG  
AATCGCACGGAACAGAAGAATTAGTTGAAGCTAAACTGTCGTTTTTTGAACAGAATTGCTGCT  
GGTTTTAAGTGCCGAGACAAAGGGTATTGAACCGATTACAGAAGATGAAAAAACTGATGATTC  
TATACTGAACGCTGCATCTATGTGGTTTTTCAGCAAATATGGTTCTGCCTGCTTATGCCATTG  
GCGCCCTAGGGCCTATGGTGTGTTGATCTAAATTTTCGGCCAAAGCGTTTTTCGTTATTATTTTC  
TTTAACTCTTAGGCTTGGTATCAGTTGCTTTCTTTTTCTGTTTTTCGGTGCAGAGCTGGGCCT  
AAGACAGATGATTTTGTCTAGATATTTAGTTGGCAATATCGCAGCCAGGATCTTCTCTTTCA  
TCAATTTTTATTGCCGTGATCGGTTGGGGTATCGTTAATACCGTAGCAAGCTCGCAAGTCCTG  
AATATGGTTAACCCTGGTCAATGTCTCTCTGGGCTGGTTGTATAGTTATTATCGGTGC  
TACTGTAATTGTAACTTTTTTTTCGGCTATGGAGTCATTCATGCTTACGAGAAATGGGCGTGGG  
TACCAAATTTTGCCGTTTTTTTTGGTAATAATTGCTCGTTTGGCAAGGTCTAAAAAATTTGTC  
CTTGGGGAGTGGACATCTGGTCTACTACAGCAGGTAACGTGCTTTTCATTTGGATCAACAGT  
TTATGGGTTTTGCTGCAGGCTGGACAACATATGCGGCTGACTATACCGTTTATATGCCAAGGA  
AAACGAACAAGTATAAAAATTTTTTTCTCGCTTGTAGTTGGGTTAGCAACACCATTATATTTT  
ACTATGATACTTGGTGCAGCTGTAGCAATGGCAGCTATCGGCGATCCAGCCTGGAAGACGTA  
TTATGACGAAAATTCATAGGTGGTTTTAACTTTTGCCGTTCTTGTCCCTAATTCGTTCACG  
GATTCGGTCAGTTCGTGTCGTGTTATTGTCTCTGTCCACTATCGCTAATAATGTTCCCAAC  
ATGTATACTATTGCTTTATCGGTGCAAGCCACGTGGGAACCTCTTGCGAAAGTCCCAAGAGT  
TATTTGGACTTTATTAGGCAATGCGGCCGCAC TGGGTATTGCCATTCTGCCTGCTACTATT  
TTTTCTACCTTCATGAATTACTTCATGGATTCCATAGGTTATTATTTGGCTATTTATATTGCC  
ATTGCATGTTTACAGACATTTTTATTTATAGGCGTTCCCTCAGTGCTTACAATGTTGATGATTG  
GGATAGTTGGGAACGTCTACCTATCGGCATTGCAGGTACTGCTGCCTTAATTGTTGGTGCCT  
TTGGCGTAGCGTTGGGTATGTGCCAAACTTATTGGGTTGGCGAGATCAGCCGTTTGATCGGA  
GACTACGGTGGTGATATTGGATTTCGAGTTAGGACTAAGTTGGGCATTTATAGTTTACAACAT  
TGCTAGACCCTTTGAGCTCAAGTACTTTGGTTCGTTAA

>YGR134W 0.79 Cold

ATGACGAAAAAGAAAGCAGCTACTAATTATGCTGAAAGGCCAAAATTTAGCCAGTGAAGATTC  
TTCAGGTGATTCGTTTCATTTTAAGGACTTTATTCCCTTACAAGAGTTACTGAAAGATAAAA  
ATTATGTTCCATCGGTGGAAAAATTTGGAGAAGATCTTATATAATGAAACCATGTTTAATGAT  
CAGAAAATATGCTCTAACCTATTGCTTGAGGCTCTCATAATTACGTTGTTTACAACAATTTT  
AGGGAAGTCAGCTTTACGATTAATTCAGACTTCTTCTTTGAAGGAAAGAAAATCCTGGGCC  
AGTCTTTTGAATAAACAGTTC TAGCTATGCTTCCATAGTACTGAGTTGGAAAGATAATGAT  
ATATTACTCCTGAAATTCCTAAGGTTTTTATTAGCAAATAAAAACGGCCCTCTTCAAATTA  
TCGGTACAATCTTCCAGAATACAACTCCCGTTGAGCTTTTTAATTGTTTCAAAAATTACTA  
TTCCGTCCATATTACTCAATGAAACGTATAATTTGTTAAAGGACTATTTGTATTTCGATAACT  
GGCCGTATAGAGAGTTTGATAAGCTGCAGCTCCACATTTGATAAGCCAGCACTTGTGCTTAG  
AAAAATTTTAAAAGATTACAATAGAATGATAGAATGCCGAAATTTTTATTTCTGGTATTCCT  
TTAATGCTGAGAACAGAGTAAATCTTACTTTTAGTGATAACATTAGCCTGTTAATGGAAAAT  
GATGAAGGCAATGCTGGAAGTGGCCTTGACGATAGCCGTTTTGATCATCAAAAACAACCGAG  
AGAGGCCATAATGGGCCGAACAATAAATGACCAGGAACAAAATATATTCATTCGAACTGAACC  
AAGATGGAACGCTTGAATAACCCAACGTTATGGAGCATTCTTTACTAAGACACGAGCTTCTT  
TTTAAAATATTTAAATCTCACTACGGTATTGACGCCATTATTGGAACTACAATTTTCTACGCT  
ATGTGGCTTAGTAGATCCATTAATGCAGCCTACTCCCAATGATAAGCATATTATATCGATAG  
ACTTTCTTTTTTTCAGCTTTTTTTGGGATTAATGTCTCAGTCGATCAAGACTTCTCAAGAACAC



AACGACCATTATGACTGGAAATTTTATATGTGTTTTAACATGCAAAAAATTATTGATGCTAC  
CATGTTGAGGCTCAACTGCTTTGATTTTTGATATATTAACCTCGGTAAACAATACAGATAATG  
CAGTTCATTGGAAGACGCAACTTCACAGATGGCTACCGCATGGCCTGAATACACAAGACTTG  
GAATTACTCTATATGATTGATATACTGGCGGTATATACCATCTACAAGTTGTATGAAAAAAT  
ACCTATACAACTAAACCCATTTTTATTTTCATTAATATCCTTATGGAAAAACCTCTCCTGTG  
TTATACTTTTAGCCTTAGAAAATTGATAGAATTGAAGAGGAGAATGGCACTTACGAAACGCCG  
CTTATGGTTTCGCGCCACAATTCGTGGAGCCGCAGCATTGAGGTCTGTAATAGCTACCGTTCT  
CAATGGATTAGTGAAAAATAATGATCATGATTTCAAGCACGAGTCTTTAAACACATTCATGT  
CGCCCTATGGAAGAAAATTGTGTCATGGTGCTTTATATGCCGATTTAAGGTCACATACTGCA  
TCTCTACTTTCGCTTGGAGCAAGCATCGAAGATGTAACAGATTTATTTGCCGATTTACAGTC  
AGGTGATAGATTTGATGAGGATATTAGATATATGTTTGATTATGAATGTGAAGATTATGATG  
AATCTTTCTCTGAAAGCGATCATGGAGGATTGGATGAAAGCGTTGTTAACCCAACAGAAAA  
ATAGCATCTGGTAGTAATAATGTTTTCTTTCCGGAGACGGTGCAATTGCATCTTCAATGATGA  
TAAGTTGGTGGCAGAGGATGGTGCAAATGAAGCCTTTGGGTCAACAAATAGCGAAAAACGTTG  
AAGGCGCAATGCATAATAATAGGAATGCGGTACATAACGCGACTACAGCCACTTCTGATCAC  
GTCGTTACGTCACCTAACCCACTTTCCGTTAGATCAAGAAGTACTTTTTGAATTTGACTATAG  
TGGGGAAGATTGGAGGGACGTTCCAGAGATTTCAATATGTACTATTCCGCCATCTTATTCAT  
TCATCCATGAGCCTAAGTTAGATGTCATATTTAGTTTGACTCTACGTGGCGCAACAGAAAAG  
TTGAATAAGGAGGAATCCATATTGTTAGTGCGTTCAGTTGCATCGTGTGAAGGAACGAGCA  
GGACCAATGATTTTAGCAGACCTGGAGTCTAATTTTTCCGCAAGTATAAACGGCGATGTAG  
AAGGTGAAGGAAATACCAAAATGTCCAAGATAGATAATGAAGATCTCAGAAGAACCACGCCG  
GATGATATTTATGAAATATGGTCTGAAGAATCAGCATTGAAAGGATGCTAAACGTGAATCA  
CGACGTTGCGTGGAGATTAATGGATGAAATGTTAATGTGCACCGGTTATAGGAGAATATTGA  
TATGGTTCCTTACGCATTTGGAGTTAAAAACATTCGTTGATATATTACGTTTTTTGAACTAATA  
ATGGGGTTACGTGAAAACCGTTTTCCGGAGAAGCCAGTGATCAAGATAAAAAGGATGATAT  
GATATATGAGATCTTGAAGAAAAAGCAGAAGAATGAAGATGCTTCAGGACTTCCCTTTTCAA  
GGCAAGGACCTATCGTATTATCTGATATTGAGACTAAAAATGTTACTGCAGGAGTTTTTTATG  
AATGCTGCTATTTTTTTTTGTCATCAAAAAATAACGAAGAAGAGAATGAAGACGGCGAGAAAAT  
CTCCTTGTACTCCCTTGGTTTTGGTTAGGTTGATCTGTTACATGGTGCAGACACTCATCGCGA  
ACGACAAGTTTTTTTTTACCAAATCAGAATGCACTTTTGAGCTTCAAACCTTACTGATGACA  
TGGATTGGCATCCTTCCGTAAGCCAAAGATTTATTCCTTTAAGATCAAGACAAGGCTCGCCAT  
GGAAGAAGAGGATAGTGCCGATACTATGCAGCATGAGGGCAGGAAGAACTCTGACATAGAGA  
AGAAGCTAAACGCTAAGCCAGCTTCTGAACTGAATCTGAAATTGTTAAACCTGTTTCCCTCA  
AAGCCTGCAAACAAAGACGATAGTTCCCTATTTAACACGTTGCGTAGTTTTATCGCTGATTA  
CTCCTTCGACACCCAGGTGAACCCTCCAGGAAGAAGGGTGGTGTCTACGATGGTAAGATTT  
TGCCATTGCCCAAAGCCGATAAGCCTATCCCCTTTCATGAATATATAACACTCGCAGAGCTC  
GATGTTGGAGACAGTGAGTGA

>YGL156W 0.82 Cold

ATGTCATCTGAGGATATCATTTATGATCCTCAGTTCAAACCTGTTTCAGGGAATCTACGAGAA  
TAGATTAAGACAATTTATTGATACTGGTGGGATTACCATGACTTAAATTTACCCAAGTTTTT  
ATGATAAGAAGCGCATTTTCATTAGATCATGATCACGTTAAGGTTTGGTGGTACCAGGTTTCT  
TTTGAACGTGGATCTTCCCCTGTTTCCCCTGATAAGAGGCCATCTTGGAAATCTATTATTGA  
ACGTGACAAGAAGGGTGAATTGGAGTTTAGAGAAGCAGCAATAAATCAGCCCTTTGGACCCA  
GTTGGTCTACCCTTGGTTCAAGGTGAAAACTCTTTGCCTGAAGATTGGGTTAAATCAAAC  
GAGCAACTACTTTTCCAATGGGATTGTTCTAACGAAGGAATTGTCATAGACCCAAAGACTCT  
AATCCCTGTGACTGCTTTTTTTCAGGTGGTGAAGGACTGAATATGTTTTACCGAAAACATCGG  
ATGGGAAACATTTCTTTTACATCGAAGCTGGTAATAATGGTATGTTTGGCTGCGGTGCAGGA  
TCCACTATAAATCCACCAGATGATAATAGATTTTTTTCATTTGAGAAAAGCTGATATCGTTTG  
GCCGATCTAGATGCTCGTGCATTGTATATCGATTTTTTGGATGCTAGGGGATGCTGCAAGAG  
AGCTACCTGGAGACTCCTGGCAAAAACACCAGGCAAGACAACCTAGGCAATGCAGTTATGAAT  
CTTTTTGACCCGAATGATCGTTCAAGTGTTCGTAATGTGCGTGAATTACTACAAAGGGAATA  
CTTTGACTCCTTTTTTAGAAAAGCAGTAAGGTTTACGAACAAGGTGAATCTCAAGTTTTAACAA  
ATGTTTATGGTATCGGCAACTGTCATATAGATACAGCTTGGCTATGGCCATTCGCAGAAACA  
AGAAGGAAAATTGTGAGATCTTGGTCTTCCAATGTACTTTAATGGATCGCTTCCAGAGTA  
TAAATTTGTTGCTTCACAAGCCCAACAATTTAATGGTTATTAGAAGATCATCCCGAATTTT  
TCAATAAAGTGTAAATTCAAAAATTCAGCAATCTCAGTTTTTTGCTGTTGGTGGTACATGG

GTTGAGAATGATACCAATATTCCCTCAGGGGAATCGCTGGCAAGGCAATTCTTTTTTGGTCA  
 AAGGTTTTTCTTGAAGCATTTTGGTCTCAAGTCAAAGATATTTTGGTTACCTGACACCTTTG  
 GTTATTCCTTCGCAAATGCCACAACCTTTGCCGCTTATCTGGTATTGATAAATTTTTGACTCAA  
 AAGCTTTCCTGGAATAACATCAACAGTTTTCCGCATAGCACGTTAACTGGGCAGGGATTGA  
 CGGTTCTCAATTATTGACTCACATGCCTCCTGGTAATACGTATACAGCAGATTCACACTTCG  
 GTGATGTTTTGCGTACTGCCAAGCAGAATAAGACACCAGAATATTACGGCTCCGGTTAATG  
 TTGTACGAAAGGGTGATGGTGGTGGAGGACCAACTGAGGAAATGCTGCAAAAAATGAGGCG  
 TATTAGATCCATGAATAACAGAAATGGTAATGTTATTCCAAAGTTACAAGTTGGTATAACGG  
 TTGATGAATTTTATGATGACATTTTGAAAAGGACTAACCAAGGCCATGATTTACCCACATGG  
 AGTGGTGAATTGTATTTTGAATTTTCATAGGGGGACATACACCAGTCAAGCTCAGACCAAAAA  
 ATTAATGAGGTTGTCCGAAATTAACACTACATGATTTGGAATGGATAGCTGCCAAAACATCAG  
 TTTTATATCCCGATTTCGTATAAATACCCTTCCAAACAGATTAACGAACTTTGGGAGAAATGTT  
 TTGTTATGTCAATTTACGATGTTCTACCAGGATCATGTATTGAAATGGTATATAAGTATGA  
 GGCTGTCCCTATGTTGCACAACGTTGTGAAAAGAAATGTACTTCCTTAATAGACAAAACCGTTC  
 AATTTCTTCAGAGTCAGAGTAAGGCAGATTTGGTTGAGATGAGAACATTAACCTGGTCAAAA  
 CCAGAAAAGGTTTCTGAGGAGTGCTCGTTGAACGGTAGTTACACGTCTCTGTAACCGGGTA  
 CGATGACTATATAGTCTTGGCAATGGGAAGTTGAAAGTTATCATTGCAAAAAGACTGGGG  
 TGATCACAAGCATTACGGATGAAACTTTGGGGGTAGAATACCTGGACACGGAACATGGCAGA  
 AACAAATTGGGCGCAACCAGTTGTTATTTATGATGATAAACCTTTGGGCTGGCAGGCTTG  
 GGATACTGAACTTTATTCCGTCAACCAATACAAGTATGTAACAAAGCCGAAGAAAGTTCAAG  
 TTTCTGCAACACAAAAGAGAAATGTGCTGTTGAGGTCATTTTTCAAATTTCCGAAAAATGC  
 AAAATCAAATCAGTGATATCACTCAATGCAACTGCGGTCCTGATGCTAAATTAAGTAAAGT  
 AGACATTTCTACGACGGTAGAAAACCTGGGATGCTAGAAAACAAATTTTTTAAAAGTTGAATTTT  
 CCGTTAATATTCGGAACGATTTTGCTTTCGTATGAAACTCAATTCGGGATTACCAAAAAGACCA  
 ACACATTATAATACCTCATGGGACGTGCTAAATTTGAGGTTTGCCATCACAAATTTGCTGA  
 TTATTCTGAATACAGCAAGGGTGTTCATTTTGAACGATTGCAAAATATGGGTTTTCCACAC  
 ACGGTAACCTTGATGAGATTATCATTATTAAGGTCACCAAAGGCTCCGGATGCGCATGCTGAT  
 ATGGGTACTCATGAGATAAAAATATGCTATCTATCCACATAGAGGAGCACTATCAAGCGACAC  
 TGTTAAGCTCGCTCACGAATTCATTTATTGCTTCAAATACAACTCCCCAAAGATATTGGCA  
 TGAATTTTTGATGACATCATAAGCATTTCGGGAGATGAGAATGTCATTTTGTCTAACATAAAA  
 AGAGGCGAAGATGATAGTGCTGTCAAGTCCAACCTATTCAATTAATCCAAGGGATGAACAAAG  
 TATTGTGGTAAGGGTTTACGAATCTCTTGGCGGGGAATCTTTTGCTTCACTAAATACCACAC  
 TAAATTTGAAGCGTATTGAGAAGGTCGATAACTTGGAGATGAAAGTTTATAAGAGTTTGACA  
 GCAACGCGAGACGAATCAAATCATGCAATAAACAGAATTCCCATTAATGAGACCTTTTGA  
 GATTGCCTCATTACAGTTGTATTTCTGA

>YNR062C 0.81 Cold

ATGTCAATTGCACAAGATAGGGGTATCGTTTTCAAGCTTCTATCAATTTATCGAGCAGCGGC  
 TGGTATCTTCATGGCGTTGGCACAATTAATTGTCATATTTTTTGGATATTGCGATTTTAAAA  
 TTAAAGGGTATCGCATTGCCTCTTACAATGCACCGACATTTGCCTCCAGTTTCATAATCTTT  
 GCAGTATGCCTTTTATTAGTTGCTGTTCTGGAAAATCCTGAGGTTAAAGTTACAAATTCGGA  
 AAATAGCCTTTTCAGTGCTCTGAAACAATTTTTTAGAGTCGAAAGAAAAAACTCATCTCCT  
 GCTTGATTTTACTATGGAGCATGTTCCATCGTCATTTATTATGAGCGAAGTAGTTTATTTT  
 ATGCCACTATTCCCTGACGCTCCACGTTAACTGGGACACCAAGTTTCAAGGCATAGCGTTTAT  
 GGTGCGATCTATACTTGGTGTGACTGGAAGCTATTTTCGCTCCAAAGTTAATAAACGTCGGGT  
 GCTCTGCGGCAGAGCCAAAGATGGCGGATTAGAAGAGTCAGATACAACCTGGAAGTGAGACC  
 GTTGAGGTAAGAAAAAAGATTTCGCTGTACAGCGGTCAAGTTTTTCTGTCCATCTTTGCATT  
 GTTTGTTTCATTGCTGGGACAAGCTTTTATGATTGGAGCATCCGAAGCCTTGAAGCATAAAT  
 CAATGCCACCCACAAATTCGGTATATTTTTTTCAGCTGGGATGTGATTACATTGTTAGGG  
 TACAATTTTTTGGCTTCGAGCATTCCAGCCCTTTTTTCCATGTACATCGACCCCAAACCTCAA  
 GGTCCAGTTGATGCCTTCAATTGGAGCAATCTCTGGGATTGGTAAACTGGTGGCACCGATTG  
 TATTAGCAGCTCTTTATGGCACAAGATTGGGGCTTTCAATTGCGGTTGGATTGGTATGATT  
 TTGGTAGCTGTTCAATTCCACCGCTTATTTGGCTCAGGAAAAAAGGTGTTAG

>YDL006W 0.75 Cold

ATGAGTAATCATTTCTGAAATCTTAGAAAGGCCAGAAACACCATATGACATAACTTATAGAGT  
 AGGTGTGGCGGAAAATAAAAACCTCGAAATTTCCGAGGACAATGGAAGATGTTTCATACGTATG

TTAAAACTTTGCTTCAAGATTAGATTGGGGATATTTTCGCGGTGTTTGATGGACATGCTGGG  
 ATTCAGGCCTCCAAATGGTGTGGTAAACATCTTCATACAATTATAGAGCAAACATTTTGGC  
 AGATGAAACACGAGATGTTAGAGATGTATTGAACGATTCATTCCTAGCCATTGACGAAGAAA  
 TTAATACAAAACCTGTAGGAAATAGTGGATGTACTGCTGCTGTTTGCCTATTACGTTGGGAG  
 CTTCCGGATTCAGTTTCTGATGATTCAATGGATTTAGCCCAACACCAAAGAAAGTTATATAC  
 AGCAAATGTTGGTGATTCTCGAATAGTATTGTTTAGAAAACGGGAACAGCATAAGACTGACTT  
 ATGATCATAAGGCATCTGACACTTTGGAGATGCAGAGAGTTGAACAAGCAGGTGGCCTGATA  
 ATGAAAAGTCGTGTAATGGTATGCTGGCAGTGACGAGATCGTTAGGGGATAAATTTTTTGA  
 TAGTTTAGTAGTGGGCAGCCATTTACCACGAGCGTAGAAAATAACTTCTGAGGACAAATTTT  
 TAATCCTAGCGTGTGATGGATTATGGGATGTTATTGATGATCAAGATGCATGCGAATTAATC  
 AAGGATATTACTGAACCTAATGAAGCTGCAAAAGTCTTGGTTAGATATGCTTTGGAAAATGG  
 CACAACAGATAATGTAACGGTCATGGTTGTCTTCCTCTAA

>YOL119C 0.78 Cold

ATGTTGAACATTCCCATAATTGCTAACTCCAAGAGGTTCCCTGTTCTCAAAGGATCACGAAGC  
 GCAATCTACGAGAGATCACGATGTGGAGCTGGAGACAAGGGAGGGCCCAAGTTCAGGATATA  
 ATCCAAACTTCAATGCAGCGGACGCGATTTTGA AAAAGAACAGCGATCAAGTAGATCTTGAC  
 GTTAATAAGTTAACGAACGTCACCTCAAGAGTTTTTAAACACCCAGAGGCCTCTTTGATTTA  
 TGATGATGACAGAGAGTTCCCAGATGGTGGGTTAAAAGCATGGCTGGTAGTATTTGGTGCGT  
 TTATGGGACTGGTCCCGGTTTTTGGCTTAATCAACTCCTTAGGGGCTATTGAATCATATATC  
 TCTAAACATCAATTGGCAAATATATCTTCTTCAACAATATCTTGGATTTTTTCCCTATACTT  
 AGCTATCAGCTTTTTAAGCTGTATATTATCCGGTGGCTATTTTTGATAGAAATGGTAGTATTG  
 GTTTGATGTGCACAGGTACAGTCATATATGCTGGAGGACTATTCGCATTGGCAAATTTGTAAG  
 TCCGTATGGCAGTTCATTTTTGGCATTCTGTGTGCTCTGGACTTGGGACGGGAATTTTTAAT  
 GACTCCTCTGATAGGAACTGTTGCAACCTGGTTTTTAAAAAGAAGGGGTATAGCAACATCTA  
 TAAGTACCATGGGGGTTCAATAGGGGTATAGTTTTTCCCTATTATGCTGAGAAAGTTATAT  
 AAAGAAGTGGGCTTTCAATGGGCCATTAGAATCCTATCATTCAATTTGTTAACATGCCTCAT  
 TTGTGCTTCAGTTTTGGCTAGAGAAAAGAACTAAACCGGTCGTTCAACCATTCAAATCCAAGG  
 CGGAAGTAGCAAAGTGGTACATTTCCCTCTGTGTTCAATTGGAGATATTTTTTGGAAAGGAAA  
 TTCTTGTTTCGTCGCAATAGGCGTCTTTTTGCAGAAAGTCCCTAACTTCATGCGCTACATA  
 TTTAGCATCTTATTCTATGACAAGAGGAAACACAGAAAATGTTGCTTATACCATGATCACTG  
 CTTGCAATGCTGTTGGTATACTTGGAAAGGTATATACCAGGCTATTTTTGCGGATAAGTTCATC  
 GGGAGATTCAATGTAGAAATTATCACCATTTCATGGCTGCCTTATTTAATTTTTGTCATGTG  
 GCTGCCATTTGGCGGTAATACAAAGGTACTTTGGGCGTACGTTTGTGTTGGGGGTTTTCGA  
 CGGTTCTATCCTATCACTGACACCCGTTTGCATCGGGCAGATATCTAAAACACTGATTTTT  
 GGTAAACGTTATGCAACGGTATATCTATTGCAAGCGTTGGTAACGATTCCGGTTTTACCTAT  
 CGGCGGTACCTTAATCGGTAAAGGTACAGTTGCAAATTATAACCATTTTATAATATTCAATT  
 CAGCGTTAATGGCGGCAGGTGCGGCATGTTATATAAATATCAAGGCATATTTGCGTTGGTGCG  
 AAGCTTTGTAAGTTTTAA

>YBR287W 0.82 Cold

ATGGTTGAAACATTTAGTTTTGCTCATTTGGCTTATTTGGTCTTTGAGTCCGTTTTTACAGGT  
 AGTCATTATCGCACTCGCTGGTTTTTGGAGCGCTAGTTCTGGTCTGCTGCCCAAACAAGTC  
 AAAAAATCATTCTCTGTTGAACGTGGACCTTTTTACACCATGTCTTATTTTTAGTAAGTTG  
 GCCAAATCCCTGTCCATGGCCAAAATCTTTGAAATAGCCATCATTCCATTTTTTTTTGGTTT  
 GACTACTGGTATTTCAATTTATTTCCGGAAAGATAATGAGCCGTATCCTAGACTTGGATAAAG  
 ATGAAACTAATTTTGTGGTGGCAAACCTCTGTCTTTGGTAACAGTAACTCTCTACCTGTGTCC  
 TTGACATTATCTTTGGCTTACACTCTGCCCAACTTAACTTGGGACCAAATTCCTAATGATAA  
 CAGAGATAACGTTGCATCAAGGGGTATTTTATACTTGCTGATCTTTCAACAAATCGGACAAA  
 TGCTGAGGTGGAGCTGGGGTTACAATAAGCTAATGAAGTGGTCTGGAGAGAACACTCAGCAT  
 ATGCCACCTTCTCAAGTGCAATCTTTGTTGGAAAGGACGCCAACATTGATAACGAGGAAC  
 TGTCAATGAGGAACAAGAGGAACAAGAATTGCTTGAAGAAGAAAATAACAGAATGAACTCAT  
 CTTTTTTGAGTTCGAGTTCCATCGGTGATAAGATTTGGCAAAAATCATGCACTGTATTTGAG  
 AGAATCAGAGCGAACCTTAATCCCTCGTTATATTCCATGATTTTTGCTGTTGTTGTGGCAGC  
 AATTGGTCCGTTGCAGAGAGAGCTATTTATGGAAGATGGGTTTATCAATAACACATTTGCCG  
 AGGCTGTTACGCAGCTGGGTTCAGTTTCTATCCCCTGATCCTGGTTGTCCCTCGGTTCTAAC  
 TTATATCCTTCTGCGGAAGTCTTCCCTAAGACGGTTCACCATAGCAAGTTATTGATCGGCTC

CATCATCGGAAGAATGATTTTACCTTCTTGCTTCCTTTTGCCTATTATTGCTATTGCTGTTA  
 AGTACATAAACGTGAGTATTTTGGACGATCCAATTTTCTTGTGTGCGGTTTTCTTTGACT  
 GTTCCCCTCCTGCCATTCAATTAACCTCAAATCACTCAACTGAATGAATTTTTCGAGGCAGA  
 AATGGCCGATATTTCTATTTTGGGGGTACGCTGTCTTAAGTTTGCCTGTAAGTATTATTGTTG  
 TCTCAGGTGCAATTTACGTTTTACAGTGGGCTAACCCAACTTAA

>YDL189W 0.73 Cold

ATGACAGCACTAGATTCTCGAAACTGGGGATTGACACCCGCTATGGAAACGGGCTTGTTC  
 GAAACCACAGGACCGTATCTTTATAATAGAGCTGGAAAATTCATAGTGTTCATAAACT  
 CAAACACAGAATCATTTTCAGCTAAGACCGATGAATTCATATTATAGGCTTCTATCGCACCAA  
 ATAGCTGAGTACCACAACCTTGAACCATGTTTTGGCAAGAACTCAAGATAGTTGTGTGATTCT  
 TTTCAAAGGTGAGAATTTCCAAAAGATTGAAGGAAAGCCACTCTTACAAGAGTTGCAGCTGA  
 AAAAAAACCGGAAGAGTGTGCTTCCTCAAGTGAGAGTATTGAAAAATCGAACAATAACAGA  
 ATATTTTCGAATCTTAAAGCGGAAAGAGGTAGGTAACGAGTGCATTATAAAATCGATGGCAA  
 TACACGTACACCAAATAGCAATTTGACAGCCAATTCAAAATAAGGACCAAAAAATCGAAATCG  
 ATGATAAATCTAGTACTGATTTGGAACAAGAAAGAATTGAGAAGGAAAGACTTTTATGAACAA  
 CGTAAACAAGAAAATTTTTGATAAGCTCAACAAGAGTGAAGACGATGTAAAGTCAACCAACAG  
 TAGCGGTAGTAGTGATAGTGACAATGAATGGAGTGATTGGTTGAACGGAGATGACTCTAACA  
 CACAACTAGTAACGGTTCAGTTAGCTCTTCATCACCATTCAATTCATCTGTGACGACGATA  
 CAAGTAAACAACCTCAACAACAATTTTATGATAGTGAAGAGGAAGAGGAGGAAGAAGAAG  
 AGGAACAACAATTACAAAGATGCCTATAGAGGCCAAAGTCGTCGGAATAAAGAAAACGGCG  
 GTTACCAATCGGGATATTCTTCGCCATATCTTGTGTATCCTCCTCCCCAAATGGGTGGCAAT  
 AGTCTGCCAACCTACCCTCTAATGTATAACCCCGCTGGTCTGCCCCCGTCTGCACCTTC  
 ACCCATGGTAATGGGCAATAACACAGTCTTCATGAACCTTACATGTACAATATGAATCCCC  
 AAGGGTCTGTTGTTTTGGCACCCCAATCCCTATGTATCCCCCATAACCAATATCAATATCAA  
 TACCAATATAACACTCAGTATCACAGCGGGCCATATAGCAATACACCAAGCTATAATTTCTAA  
 CAATTACACAAGATCCTCAGCAAATAAGTACCACCATTTTCAAGGAAAAAATTCATATTCTG  
 GTGCGATTCCGAAACGTAGTGATGACAGTAACAGTAATAAGAATGAGGGAATTCGTAGGGCT  
 AGTGTGAGGGTTCGCCGTCATCTAGGGATACTGATTCGGTAGAGATGAAATTTGATAAATTT  
 AAACATTTAG

>YPR097W 0.79 Cold

ATGATTACTCAAGACACTCCTGCTTTAAATCCAACGGAAGAACAACACTACCTGAAGAGGGAAC  
 TCGGTTATCCTTTCTCACCACGATCCGACAGCTCCACAGCCTATCTCCAATAACGATTCA  
 TCACCAGTGCTCGGTGGCAAAGGCCATTTTAGCGTTAATTATCCCATGCTGAGTTATGTTTT  
 GCAAGAATTTATATCCACATTTCTTTACTTTCAACAAAATTTGCTAGTTGATGAAAAATTTCT  
 GGCAGAGTAAGGTTCAAGTGTCTTTGAACATTTTCATGAGTCTTGGGTTTAGTGAAAGTTAT  
 GACAGGGAGGAAGCTTCAAAAAGGAAGAAAGTTTCCAAAAGCTATCAAAGTTATCTTGTT  
 GCTCTTTAACTCCGGTGTGGCTCTTTTCAAGAGCAAGCGTATTATAATGAGGATAAAATTCG  
 TTTTACAGTCAGGCCAAGCGAGAAAACGCTCTAATATTGAGAAATTTGCAATGCCAACTAGA  
 GAAAATTTAGAGAATTTGCTCACTAACGAATCCGTTTTTATTAACGGTTGGGACGTCAATAT  
 TATATCCGTGTTCAATAAGAATTCACGGAAATGTACTGAAAGTGTGGATAATGACAAGTCTA  
 GTAAATCTACTCCAACCTTCGAGTCCCAAAAGCCATGCTATAAAATCATTTGCTTCCACTTCT  
 AAATGGATGAAGAATGCCTTCAACAACACTATTAACAGTACCATAAATAGTATGCCCGAATC  
 CTCAGCATCTTTATTTTCGAAATTATCCCTTGGCGTGCCTTCAACTAAGAGCAAGCAATCTA  
 GAAAACATCATTATTTCTTGATTAAGATTAAGAAGCAAGATGACGACGACCAAGATAACAGC  
 AATGAAGAGAATAGTAATCTTGATCACCATGCTGGTTATTTCTATGTGACAAGAACATAACAG  
 CGACTTCAAAAAACTATCTCATGATTTAAAATCAGAATTTCCGGGGAAGAAATGTCCGCGCT  
 TACCTCATAGAAAATAAAAAAGTGACGTCTATGATAACTAAAACCGAAGTGTACACAATGGG  
 CAACTAAATCAGCAGCCAGGGAAAAAATCGTCAACACTTTTGACACTGATTTACAATCTGC  
 ATCAGAGTCTGATAATTTCTCATTTTTTACAGACAACGAATGAATTATCTGCTACAGAAAACAG  
 TACTCACAGAAAAAGAACTGAAACGTTGAGAAAAAATATTCTAAATGAGATCAAGGAAGAA  
 GATAATATTGATGAGGACGAGTATGAGGAAGAAGGTGAAGGTGAAGAAAGTGATTTTGATGA  
 ATATAAAGATGCATCCGATTCAAAAATCAACTTTTGGTGGGTGAAAAAATGAGAACTTCAT  
 TAAGACAATATTTAAGGACTTTGTGTAAGATGCAGAGGTTTCTCAAAGCTCATCTATTCGT  
 CGCTTCTTCTAAGTGGGCCTAATTTAGATATTAAGGACATAAATCCGAAAATAGCAGATGA

CATTAGAAACAGGGCTCTGATAGATGTAAGTAATTTGGAGAACCAAATACGTTTCCAACAGA  
 TGGCGTTAGAAAAGTCTTTAAAGCTGCAAGACTCAATGAAAGATTTCAAACATCCCTGTTA  
 AAAGATGAAAAATACTTGATGAGTCTACTAGTAGAAATCAAGGACAATACGAAAGTTGAAGA  
 CCTGTCACCACTTTTACAAGACTTTGTGGAATGGTGTAAAGATTTATATTTCCCTCAATGATTT  
 ATCAAATGTTTCTGGGTAACGATAACAGTTATGAACTCTATACACAAAATAAGACGGTTACAT  
 AAGCTTATGCCGTACACAGTAATGGGACAGATCATGAAATTTACTAATCCAATAGCGATCAT  
 GAGGGGTATGATTGAATTATTTATGGCACAACCCTTCGGTGGTCATTCGCTCCTTCAAACAA  
 TGTTTTCTACGATATTAACAGATGATTTGAAAACCTCAAAGGTAGCTATAAAGGAATTAGAA  
 AGGAAAATTGCTGAGATGGACCCGGGCGCTTCAGTTGTGACTAAATGCTTGAAGGATTTTGT  
 CTTTAATAATGATACTAAGGATGAGCATGATACTAAACTCTTTACTATGGACGCAGTAAATG  
 CAGAATCCGAATCCATGAACATGCCTGTACCATTGATAGTATTAATGAAAAGTGCAGCTGCA  
 AATCTAATTCAGACGAGGTTGTCGCGGGACTTATTGAATCCTATTCATCATGGAAACTGCA  
 AAAAGAAGACACGGATGCCTTGAATGTAACCAGCGAAGATCAGTCAGGTATTTATTTACAC  
 ACGTCAAAGATTTATGGCAATTGTATATTAAGAACATGATAAACAGCTAATGAGGCAGCTA  
 TGGCAAGATCCTGAGTTAACCCAAATGCTAAAGCAATTGTCACTATGATTTACGAACCTAT  
 GGTCAAGATCTTCAAAGTTGCAAGGATGGATGTTGCTTTGAAAATTTTGAGAAGTTCATGG  
 GTGATTTGATCAGGCTTGTGATGATGTTATCAATGGTCAGTTGGGCGTTTCCACACAGTTC  
 GATGTCGTGGAAGAAATCCATAACTTAGTAACCAAACATCAAGATGCCTTTTTTTGAGTTTAT  
 TCATGATGTATATTTGAACGATTCAGAGGGCATTTTTTGAAGGTTTTATTACTTTGGATTACTA  
 CGATAGTGAAATTTTTGCAAAAAGAGTAAATTCGGAGGACCGAGTGAAAAGGATCGACTTCAAT  
 AAGTTAATTTGTAGAGATGATATCGATATTGATGTCAAACCTTTTTGAAAAGTTC AAGTTAATAA  
 TGTTCCTTAATAAAAAGATTGGTGCGAGAAAAATCTATAAGAAGTTGTTAGATTTGAAGGTTA  
 AAC AAGGTACTAAACAAAATAACAAACACGCTGCTGGCATACTTCAAAGAATTGGAGTGAC  
 ATAAACTCCTTGGTTATGCCATCCAGCTCTGGATCTTTTTGGACTTGGAGATGGTGATTTGGT  
 GGATTTGGATCTCGATACAGGTGATTACGATTTTTTACATAAAGAGAATGAAGTTGAATTAG  
 AAAAGCAATACAAAGATTTATTGAATCTTGTGTTGATGAAAGTGAATTTGATAAATTGAGA  
 TCTCAAGTTTTTCGCACAGGAATTA AAAAATTATTTAG AAGCTCAAATTGCTAAAAAGTAG

>YDR022C 0.8 Cold

ATGAATGTTACAGTTACTGTTTATGATAAAAATGTCAAGTACAGATTAGAAGAGAATATCAA  
 AAATAACAAGGGTCCCAGCAACGATGATCAACCAGCATAACAATAATGAATCAAAGAGCACGG  
 ACGGAAGTGATTATGCAATGTTTCCCCTAACATTAAGTACATATTTGAGGACAACAATGAT  
 GAACTAGTAGATTCAAGTGATGCTGCTTTGACAGCAGGAATAGATAAGGTCGGAGATGAACT  
 TGAAAATGTCATAATTGTCCAATTGGATGAATCGGGATCTCTTGAGGATATCACACTAATCA  
 GCGACCAATATGAGCTTTTTGTCCATAGGACAAATAGTCTCAGCTTGGAGGAAAACCAAATG  
 AGAACATTATCATCACATGGTGATGATAAATCTAATGATGAAGAGGAAGAACCTTAGCGTTGA  
 CAGTGATAGATT CAGAGTGGACTCGGACATTGAGCTCGATGTAATTT CACAATTTT GCGATC  
 TGTCTCCTTTTTCTTCGCGATTTGAGTTTTGAATGACTTAATTA AACTCTACGTCACACAAAAT  
 GAACAATTACAAATGCTCTCCAATTCCGTATGA

>YER007C-A 0.78 Cold

ATGTTTAAGAAATTCACAAGAGAAGATGTCCATTACGTTCAAAGGTCAAATCTTCAATTCA  
 AAGAACGTTAAAGGCCAAATTTGGTCAAGCAGTACCCCAAATAGAAGATGTTATTGATGAAT  
 TAATTCCTAAGAAGAGTCAAATCGAGTTGATTAATGTGAAGATAAGATCCAATTTGATTTCC  
 GTCGATGGTGAAGTTCTTTTTTTCAA AAAATTCGATGAACTGATTCCAAGCCTGAAATTAGT  
 ACACAAATTTCCAGAGGCTTATCCCCTGTTTCAGGTTGATAGAGGTGCTATTAAATTCGTTT  
 TCTCAGGTGCTAATATCATGTGCCCTGGCCTAACTTCTGCGGGTGCCGACTTACCACCTGCT  
 CCTGGTTACGAGAAAGGTACGATTGTAGTCATCAATGCCGAAAATAAAGAGAATGCATTTGGC  
 TATTGGTGAATTGATGATGGGTACTGAAGAAATTAATCAGTGAACAAAGGTCAATCCATAG  
 AATTGATTCACCAATTTGGGCGACCCCTTATGGAACCTCAGCGTTGAGTAA

>YOR197W 0.72 Cold

ATGTATCCAGGTAGTGGACGTTACACCTACAACAACGCTGGTGGTAATAATGGCTACCAACG  
 GCCCATGGCTCCTCCACCTAAC CAGCAGTATGGACAGCAATATGGTCAGCAATATGAACAGC  
 AGTATGGACAGCAATATGGGCAACAAAATGATCAGCAATTCAGTCAGCAATATGCTCCACCA  
 CCAGGTCCTCCCCCTATGGCTTATAACAGGCCGTGTGTATCCCCCCCCTCAATTCAGCAGGA  
 ACAGGCAAAGGCACAATTAAGCAACGGCTACAACAATCCTAATGTAAACGCATCCAATATGT

ACGGTCCACCCCAGAATATGTCATTACCTCCACCTCAAACACAAACTATTCAAGGTACAGAC  
 CAACCTTATCAGTATTCTCAATGTACTGGGCGTAGAAAGGCTTTGATTATCGGTATAAACTA  
 CATAGGTTCAAAAAATCAACTGCGTGGTTGTATCAATGATGCTCATAACATCTTCAACTTTT  
 TGACTAATGGGTACGGTTACAGTTCAGATGACATTGTCATATTAAGTATGATGATCAGAACGAT  
 TTGGTCAGGGTTCCCACTAGGGCTAATATGATTAGGGCCATGCAATGGTTGGTCAAGGATGC  
 GCAACCCAATGATTCTTTGTTCCCTTATTATCTGGACATGGTGGCCAAACTGAAGATTTGG  
 ATGGGGACGAAGAAGATGGGATGGATGATGTTATATATCCGGTTCGATTTTCGAAACTCAAGGG  
 CCAATTATCGACGATGAAATGCACGATATAATGGTGAAGCCCTTACAACAAGGTGTTAGACT  
 AACAGCATTGTTTGACTCTTGTTCATTTCGGGTACAGTGTGGATCTTCCATATACCTATTCTA  
 CTAAGGGTATTATTAAGGAGCCCAATATTTGGAAGGATGTTGGCCAAGATGGCCTGCAAGCA  
 GCTATTTTCATATGCCACAGGAAACAGGGCTGCTTTGATTGGTTCTTTAGGTTCTATATTCAA  
 GACCGTTAAGGGAGGTATGGGCAATAATGTGGATAGAGAACGCGTGAGACAGATCAAATTTCT  
 CAGCAGCAGATGTTGTTATGTTATCAGGTTCAAGGATAATCAAACCTTCTGCAGATGCTGTC  
 GAAAGATGGGCAAAAATACAGGTGCAATGTCCACGCCTTCATCAAGGTTATGACTTTACAACC  
 ACAGCAATCATATTTATCTCTTTTACAGAACATGAGGAAAAGAATTGGCTGGTAAGTATTCTC  
 AAAAACCACAATTATCATCGTCACACCCTATTGACGTAAATCTGCAATTTATTATGTAG

>YCL064C 0.76 Cold

ATGTCGATAGTCTACAATAAAACACCATTATTACGTCAATTCTTCCCCGAAAGGCTTCTGC  
 ACAATTTTTCTTGAAATATGAATGCCTTCAACCAAGTGGCTCCTTCAAAAAGTAGAGGAATCG  
 GTAATCTCATCATGAAAAGTGCCATTCGAATTCAAAAGGACGGTAAAAGATCTCCTCAGGTT  
 TTCGCTAGTTCTGGCGGTAATGCCGGTTTTGCTGCTGCAACAGCATGTCAAAGACTGTCTCT  
 ACCATGTACAGTCGTGGTTCTTACAGCGACAAAGAAGAGAATGGTAGATAAAAATCAGGAACA  
 CCGGTGCCAGGTTATCGTGAGTGGTGCCTACTGGAAAGAAGCAGATACTTTTTTAAAAACA  
 AATGTCATGAATAAAATAGACTCTCAGGTCATTGAGCCCATTTATGTTTCATCCCTTCGATAA  
 TCCGGATATTTGGGAAGGACATTCATCTATGATAGATGAAATAGTACAAGATTTGAAATCGC  
 AACATATTTCCGTGAATAAGGTTAAAGGCATAGTATGCAGCGTTGGTGGAGGTGGTTTATAC  
 AATGGTATTATTCAAGGTTTGGAAAGGATGTTTGTAGCTGATAGGATCCCTATTGTGGGGT  
 GGAAACGAATGGATGTCATGTTTCAATACTTCTTTGAAAATAGGCCAACAGTTCAATTCA  
 AGAAGATAACAAGTATTGCTACTTCTCTAGGAACGGCCGTGATCTCTAATCAAACCTTCGAA  
 TACGCTCGCAAATACAACACCAGATCCGTTGTAATAGAGGACAAAGATGTTATTGAAACCTG  
 TCTTAAATATACACATCAATTCAATATGGTGAATGAACCGGCATGTGGCGCCGCATTGCATT  
 TGGGTTACAACACTAAGATCCTAGAAAATGCACTGGGCTCAAATTAGCTGCGGATGACATT  
 GTGATAATTATTGCTTGTGGCGCTCCTCTAATACTATAAAGGACTTGGAAGAAGCGTTGGA  
 TAGCATGAGAAAAAAGACACTCCTGTAATAGAAGTCGCTGACAATTTTCATATTTCCAGAAA  
 AAAATATTGTGAATTTAAAAAGTGCTTGA

>YNL331C 0.81 Cold

ATGACTGACTTGTTTAAACCTCTACCTGAACCACCTACCGAATTGGGACGTCTCAGGGTTCT  
 TTCTAAAACCTGCCGGCATAAGGTTTTACCCGCTAATTCTGGGAGGAGCTTCAATCGGCGACG  
 CATGGTCAGGCTTTATGGGCTCTATGAATAAGGAACAGGCCTTTGAACCTCTTGATGCTTTT  
 TATGAAGCTGGAGGTAATTGTATTGATACTGCAAACAGTTACCAAATGAAGAGTCAGAGAT  
 TTGGATAGGTGAATGGATGGCATCAAGAAAACGCGTGACCAGATTGTAATTGCCACCAAGT  
 TTACCGGAGATTATAAGAAGTATGAAGTAGGTGGTGGTAAAAGTGCCAACACTACTGTGGTAAT  
 CACAAGCGTAGTTTACATGTGAGTGTGAGGGATTCTCTCCGCAAATTGCAAACCTGATTGGAT  
 TGATATACTTTACATTCCTGTTGGGATTATATGAGTTCAATCGAAGAAGTTATGGATAGTT  
 TGCATATTTTAGTTTCAGCAGGGCAAGGTCCTATATTTAGGAGTATCTGATACACCTGCTTGG  
 GTTGTCTTGCAGCAAATTAACGCTACATCTCATGGTAAAACCTCTTTTAGCGTCTATCA  
 AGGTAATGGAATGTATTGAACAGGGACTTTGAGCGTGATATTATTCCAATGGCTAGGCATT  
 TTGGTATGGCTCTAGCCCATGGGATGTCATGGGAGGTGGAAGATTTTCAGAGTAAAAAGCA  
 ATGGAAGAACGGAAGAAGAATGGAGAGGGTCTGCGTACTTTTGTGGGTGGCCCCGAACAAAC  
 AGAATTGGAGGTTAAAATCAGCGAAGCATTGACTAAAATGCTGAGGAACATGGAACAGAGT  
 CTGTTACTGCTATCGCTATTGCCATGTTTCGCTCTAAAGCGAAAAATGTTTTCCATTGATT  
 GGAGGAAGGAAAAATTGAACATCTCAAGCAGAACATTGAGGCTTTGAGTATTAATTAACACC  
 GGAACAAATAGAATACCTGGAAAGTATTGTTCCTTTTGATGTTGGCTTTCCCAAAGTTTAA  
 TAGGAGATGACCCAGCGGTAACCAAGAAGCTTTCACCCCTCACATCGATGTCTGCCAGGATA  
 GCTTTTGACAATTAG

>YJR004C 0.65 Cold

ATGTTCACTTTTCTCAAAATTATTCTGTGGCTTTTTTCTTGGCATTGGCCTCTGCTATAAA  
TATCAACGATATCACATTTTCCAATTTAGAAATTACTCCACTGACTGCAAATAAACAACTG  
ATCAAGGTTGGACTGCCACTTTTGATTTTAGTATTGCAGATGCGTCTTCCATTAGGGAGGGC  
GATGAATTCACATTATCAATGCCACATGTTTATAGGATTAAGCTATTAACCTCATCGCAAAC  
AGTACTATTTCTTAGCGGATGGTACTGAGGCTTTCAAATGCTATGTTTCGCAACAGGCTG  
CATACTTGATGAAAATACTACTTTTACATGTACTGCTCAAAATGACCTGTCCTCCTATAAT  
ACGATTGATGGATCCATAACATTTTCGCTAAAATTTAGTGATGGTGGTTCAGCTATGAATA  
TGAGTTAGAAAACGCTAAGTTTTTCAAATCTGGGCCAATGCTTGTTAAACTTGGAATCAAA  
TGTCAGATGTGGTGAATTTTCGATCCTGCTGCTTTTACAGAGAATGTTTTTCACTCTGGGCGT  
TCAACTGGTTACGGTTCTTTTGAAAGTTATCATTTGGGTATGTATTGTCCAAACGGATATTT  
CCTGGGTGGTACTGAGAAGATTGATTACGACAGTTCCAATAACAATGTCGATTTGGATTGTT  
CTTCAGTTCAGGTTTATTCATCCAATGATTTTAATGATTGGTGGTTCCCGCAAAGTTACAAT  
GATACCAATGCTGACGTCACTTGTTTTGGTAGTAATCTGTGGATTACACTTGACGAAAACT  
ATATGATGGGGAAATGTTATGGGTTAATGCATTACAATCTCTACCCGCTAATGTAAACACAA  
TAGATCATGCGTTAGAATTTCAATACACATGCCTTGATACCATAGCAAATACTACGTACGCT  
ACGCAATTCTCGACTACTAGGGAATTTATTGTTTATCAGGGTCGGAACCTCGGTACAGCTAG  
CGCCAAAAGCTCTTTTATCTCAACCCTACTACTGATTTAACAAGTATAAACACTAGTGCCT  
ATTCCACTGGATCCATTTCCACAGTAGAAAACAGGCAATCGAACTACATCAGAAGTGATCAGC  
CATGTGGTACTACCAGCACAAAACGTCTCCAACCTGCTACTACCAGCCTGACAATTGCACA  
AACAGTATCTATTCTACTGACTCAAATATCACAGTAGGAACAGATATTCACACCACATCAG  
AAGTGATTAGTGATGTGAAAACCATTAGCAGAGAAACAGCTTCGACCGTTGTAGCCGCTCCA  
ACCTCAACAACCTGGATGGACAGGCGCTATGAATACTTACATCTCGCAATTTACATCCTCTTC  
TTTCGCAACAATCAACAGCACACCAATAATCTCTTCATCAGCAGTATTTGAAACCTCAGATG  
CTTCAATTGTCAATGTGCACACTGAAAATATCACGAATACTGCTGCTGTTCCATCTGAAGAG  
CCCCTTTTGTAAATGCCACGAGAACTCCTTAAATTCCTTCTGCAGCAGCAAACAGCCATC  
CAGTCCCTCATCTTATACGCTTCCCCACTCGTATCGTCCCTCTCCGTAAGCAAACATTAC  
TAAGCACCAGTTTTACGCCTTCTGTGCCAACATCTAATACATATATCAAACGAAAAATACG  
GGTACTTTTGAGCACACGGCTTTGACAACATCTTCAGTTGGCCTTAATTTCTTTTAGTGAAAC  
AGCAGTCTCATCTCAGGGAACGAAAATTGACACCTTTTTTAGTGTTCATCCTTGATCGCATATC  
CTTCTTCTGCATCAGGAAGCCAATTGTCCGGTATCCAACAGAATTTACATCAACTTCTCTC  
ATGATTTCAACCTATGAAGGTAAAGCGTCTATATTTTTCTCAGCTGAGCTCGGTTTCGATCAT  
TTTTCTGCTTTTGTGCTACCTGCTATTCTAA

>YLL003W 0.79 Cold

ATGGGCAAATTCGGCAGCACAAATAAATCAACGGAGAATCTTCTGCGTGATAAATTCGTACC  
CGAGACATCTCCAACATAATATCCCACTGATGTACTCATCAAGCAAGGGCAAATAACGGATT  
CCACCGAATCACTAATTCATGGAGGCGCAGAAAGGTATATTTGTTAACGCTTTAAAGCCTATA  
GAATTAATAAAACTGAAGGCTTTTTTGAAGACCCGCGTTCCATCTTCTTCTCCACCGGT  
TGATTTCGACAAATCTGGAGTATGAAGACGTTACCGATCTTCCCTAAGAATGGTTTACGATATG  
ATTTGAATGATATATCCGTTGAGGTAATCGAAGATTTATACCGCCAGATTGAAGCTTTTTTG  
GTTCAATTTCAAACATCCAGAAGTTTTTACAAATTTTCAAACCTATGTCAATATCTTAT  
TCAAGAAGGCATCAATCCTTTACGCGATGAGTACTTACAAATATTGGAAGATGAACTGAAAG  
GTTTTTTCACTTTCAATCTGTTATAGAAGAGATTTTAGAAAATATTTTTAATCCACCCTCGC  
AACAAATTCATTGCATTGTCCCTTGCAGAATATACCTACGCTAAGAACAAAATCAGAAGACA  
TTTTAATCACTGGAAGACTGTATGTGAATTGAATGAAGAGGCAAACAGGTTTGCAAATCAAG  
CAAAGCTGAGGGTACAGGAAGCCGCTTCTATATTTGGAGTGATAAAACATTAATACTCA  
CAGATGGCCAACGATGAAGCTGAAAGTTTTAGGAATACTTGGCTACTATTTTCGCTCGTTCCA  
ACAATGGATAACTTTAACAACAACCTCTTAAGGAGCAGTCAAGGTTAGCAGATCAGGCCTTTT  
TGAATAAGATGTTTAGGAAAATTTTAAAGGCACAAGAGCATTTGGAACACTTAGAAACTGTT  
AACACTGACAACATTAAGAAGATATTTTTACGAACAACATTTTCATATATGGAAGCTAAGACA  
TAAAGAAATAAACTACCACGGGTTGGAAGAAGGATTTTCGAAAGAATAAAACAGAAAGTTA  
TAACTATGAATAAATAAGAGCATTGCAGAAAAAGTGAGGTCGTTTTCTCTACAAAGAAAA  
TATCTGAATAAATGGGAAAAGAAAAACATTTGAAAACGAAGATAAACTTGGGGCACTTTATGA  
ACTGGAGAATAAATTCATCAAAACAAAAGTTTTTTTCGCAAATTAACCGGTCATTTCAACATA  
GTCAACAAGAGGCAATTGCAAAGAGTAAACTAAATCAGACACTTTTGAGGTGCGTTTTTGTAG

AAGATGTGGCTGAAAAGATTTCGAAGACCATCTGCATTTGTATTCAATTGTAAGTCTAAAAGA  
GGCTAACCTCGTGAAGCGTATTTTTTCATTCATGGAAAAAATTCTATATATTGACCTCAAAG  
CAAGCGATTATTCGAGGACTAATTTGCTCAAGTCATCATTGCGAAGTTGGAACTTGAAGTA  
AAGTTAAAAATATTTGAGCAGAAATGTAAGAGATATTCAAGCAAGCGCGTATCGTACATG  
GAGGAAAAGAATACAGTATGGGAAAATATCGAGCGAACATGTTAAAACGGCATTTTGTGCAA  
AATATCTTGGTGTGTGGAAAAGGAGGATGCTACAAATGAATTCATGAATGACGAAGCATCC  
AAATTTTACGAAGAGGGTCTCGTAAATGAGTGTCTAGCTATATGGAAAAGACGCCTGATTAA  
AACTAAGGAATTGGAGGATAGATAACAATTTCTTATGTAAGACACATGCAATTTTACTGTAA  
AACGGACGCTAATGCATATTGATAATGTTTCATTTGCTATATACGAACTGGCGCCCTCTATG  
GATAGAGTAAAGCTTTCTAAGGCCTTTTTAAAGTGGCGGAAAGCCACAAGGTTCAAAGTCAG  
GCATAAGTTAAACGATATTTTACACGTTTATGAAAAGAGTAAAGAGCGCGAACTTCAAAGCC  
AACTGTTCAACGCTTGGCGAAAATAGATTTTGCCTTACACAGAAGAATGTAACATTCAGGCT  
ATTTCAAAGAGAACTACCAGCTTGAAAAAATGGTGTGGAAGAAATTTAGAGAAAGACTTTT  
AGAGATAGTAAAAATCAGAAGAATTAGCAGACGAAGTTCGCGAAGAATTTGTGTTAGTCAAGA  
CGTTTTATATTTGGAAAACCTCATCTAGACGAAATATTTTATATGAGTACATTTATTGGAACAA  
TCGGAAGCTAATAACAATTCATAATTACATCCAAATTTCTTGAAAATGTGGAGTCTTCGATT  
CCTAAAAATTAAGCGTAATGATGAGACAGTCGAGGTGTTTCGTCATCGGTGGGACAGGGCCA  
CTGTAAGGGGATTGTTATTATTATGGAAAAATCGTTTCAGACAGTTCTCCAAAGAGAAGGAAG  
GACTTCAATCTTAAACATGAACTAAAAACTCCATAAGATCAGACTCTCAAACGCCTCAAC  
CATAACAGGCTCAGAAAGAATAAAGCAGCACAGAATGGAAGCGATGAAGTCGCATTATAGCA  
GGGCAAGAAGAGCCATACCAAGTCCGGTGAATCTTCCAGTGTCTTGATTCTACAGCTAAA  
AAACAGATCAACCTTGAAAGTACGACAGGCTTAAACGGATCTCCGACGCGAGGAAAACCTCT  
AAGGTATTCTCCTAGGCGTACCCTAGAAAATGCCATCCAAAGTTGACCATATTGATTTTG  
GCAGAATACCCGCTGTACCTTTTAGCCTAAGCGCCAATTTCTCCTAAAAATCGATCAAGATATG  
GATTATATAAGAGAGCATGATAAATCCCCGTTAAGTCGTAAACGTCAATAG

>YDL061C 0.76 Cold

ATGGCTCACGAAAACGTTTGGTTCCTCCACCCAAGAAGATTTCGGTAAAGGTTCCCGTCAATG  
TCGTGTCTGCTCCTCCACACTGGTTTGGTCAGAAAGTACGACTTAAACATCTGTCTCAAT  
GTTTCAGAGAAAAGGCTAACGACATTGGTTCACACAAGTACAGATAA

>YKL049C 0.8Cold

ATGTCAAGTAAACAACAATGGGTTAGTTCCTGCTATTCAAAGTGATTTCGAGTGGAAAGATCACT  
CAGTAACGTCAACAGGCTTGCAGGAGACCAACAATCTATTAACGATCGTGCCTTATCGTTAT  
TGCAGAGAACAAGAGCGACAAAGAACCTGTTTCCAAGAAGAGAGGAAAGAAGACGTTATGAA  
AGCTCAAAAAGTGACCTAGATATCGAAACAGACTACGAAGACCAAGCAGTAACTAGAAAT  
CGAGACAGAAAATGAAGAAGAAGCTGAAATGAAACTGAAGTACCTGCACCAGTGCGAACTC  
ATTCATATGCCTTAGACAGATATGTTAGACAGAAAAGGAGGAAAACAAAGAAAGCAGAGC  
TTAAAGCGCGTCGAAAAGAAAATATACTCCTAGTGAATTAGCTCTGTACGAAATTCGAAAATA  
CCAACGTTCCACGATTTTATTAATCTCCAAAATTCATTTGCAAGGCTAGTGAAGAAGTTA  
CAGACGAGTTTCAACTAAAGATCAGGATTTACGTTGGCAGTCAATGGCGATTATGGCGTTA  
CAGGAAGCAAGCGAAGCGTATCTGGTAGGATTATTGGAACATACAAACCTCTTGGCGCTGCA  
TGCAAAAAGAATTACTATAATGAAGAAAGACATGCAACTAGCAAGAAGAATCAGGGGACAGT  
TTATTTAG

>YJR006W 0.74 Cold

ATGGACGCATTGTTAACAAAGTTCAACGAGGATAGAAGTCTCCAAGATGAAAACCTTGTCCCA  
ACCACGAACGAGAGTAAGAATTGTTGACGACAATCTTTACAACAAATCGAATCCATTCCAAC  
TATGCTATAAAAAACGTGACTACGGTTCTCAGTACTACCACATTTATCAATACCGTCTAAAG  
ACTTTCAGAGAACCGCTCTTAAAAGAATGTGACAAGAGATGGGATGCGGGCTTTACCTTGAA  
TGGCCAATTAGTTCATAAAAAGGACAAAGTGTAGATATTCAGGGAAACCAACCATGTTGGT  
GCGTAGGATCCATATATTGCGAGATGAAATATAAACCAAACGTAAGTGGACGAAGTGAATCAAT  
GATACATATGGTGCACCAGATTTAACTAAAAGTTATACTGATAAAGAGGGTGGTCTGATGA  
AATTATGCTCGAAGATGAAAGTGGGAGAGTGCCTTAGTGGGAGATTTTATTCCGGTCTACAC  
CCTTCATCACGGGTGTTGTTGTAGGTATACTGGGTATGGAAGCTGAAGCCGGGACATTTCAA  
GTTTTAGACATATGCTACCCCACTCCTTTACCACAAAATCCTTTCCCTGCACCAATTGCTAC  
CTGCCCCACCAGGGGAAAATGCTCTTGTTCCTGGGTAAACCTCAATAATACATCACCTG



ATAGGCTATTGAGATTGGAGATTTTGGAGAGAATTTTTGATGGGGAGAATCAATAACAAAATT  
 GACGACATTTCTCTAATTGGTAGATTACTGATATGCGGCAACTCTGTTGACTTCGACATTAA  
 AAGCGTGAACAAAGACGAATTGATGATTTCTCTAACTGAGTTCAGTAAATTTCTACACAACA  
 TTTTGCCATCTATATCTGTTGATATTATGCCCGGAACCAATGATCCAAGTGACAAATCTCTA  
 CCGCAACAGCCTTTCCACAAATCATTGTTTGATAAGTCCCTAGAATCATACTTCAACGGTTC  
 TAACAAAGAAATTTTGAATTTAGTGACCAACCCATATGAGTTTAGCTATAATGGCGTAGACG  
 TTCTAGCCGTTTCAGGCAAAAATATCAATGATATTTGTAAATACGTAATACCATCAAATGAT  
 AACGGAGAAAGTGAAAACAAGGTCGAGGAGGGCGAGAGTAATGATTTCAAAGACGATATAGA  
 GCATCGCCTGGACCTTATGGAATGTACAATGAAATGGCAAAACATCGCGCCCACCGCACCTG  
 ATACCTTATGGTGTATCCGTACACTGATAAGGATCCATTTGTATTGGATAAGTGGCCCCAC  
 GTTACATTGTGGCAAACCAGCCATATTTTGGAAACAAGAGTAGTGGAAATAGGTGGTAAGAA  
 CATAAAGATAATATCTGTCCCTGAATTCAGTTCTACTGGGATGATAATATTACTGGATTGG  
 AAACGTTAGAAGCAGAGACGGTCAAGATTGACATTTAA

>YOR115C 0.77 Cold

ATGTCCTCTACACATAGTAATAATGTAGGACATCCCCAATCTTCTCCACAAGGTCCACTAAC  
 GGAACAACAAAGAGCACAACAGCAATATCAAATTTTTGAGAATTCATTACCAAAGTAAGTC  
 AATCTGTGTATCAGATGCTGTTGAACGAGATGGTTCCTCTAGCTATGGGCATTGAGAGGCAA  
 ATATCAGGCGATGTTATCAGTTCGTATAGCAATGTAACCTCCGAAAATGGTAACATCAACAA  
 TATGATAAAGAGACTGAAGATAGAGGAACATCATAACAGTAGATATCATAACGTTCTCATAACT  
 TGATACATGAGCTGTATAAGGCGGATGAAGAGGAAAAAGAAAAGGTTTTAGCAAGACTGAGG  
 AATATTGGGTTTTCAAATCGGATTGAAGCTGTCAGAGTTATTGATATTTTCTAACAAACCCAAA  
 TTTAAAATTCAAAGAAATGGACCTTCTATTAATAATGAAAGTTCATTTGTAGGGATGTCTGGA  
 AACAAATATTTGGTAAACAGATCGATAATTTAAAAACAAACCACAGAGGAACCTTTTACCTT  
 CTTGATTATGACTATCGACCTATTCATCATTTTTCTTTGGAGGAAGATGCAAAAAACGAGGA  
 GTTAAAAATGATAGAACCGTTTTTGGAGATACCTGTGGGAATTATTAGAGGCGTGTGTCTT  
 CCTTAGGTTATTTCATCTGAAGAGGTCATTTGCTTGGCGTCTTTTATCGACAGGCCAACAGAT  
 AGGCCTAAAACAGCTTTTCCCAAGGGAGTTAGCTTCCATGTTCAAGTCACAATGCCGCAGTA  
 A

>YDR015C 0.81 Cold

ATGCTTGTTCGTTTTCATATATCAAGTCCTTTAGGCTCTTCTTCTTCTTGGAGGGCTTTTT  
 TTCATTGAAGGTGGTGGTTGTAGCCTGTCAAGCTCTTTCGAGGGACCTCCTTGGTATTGATC  
 TTGTTCTCTTACTCCTTTTTTTGGCGTCCAGATAAGCACCCCCATTGGGGCTTCCGCCACCTG  
 TGTCTCAGACAGATTTTTTGGCACGAAGTTGTTGTTTTTCCAATTCCAAATTTAA

>YNR071C 0.76 Cold

ATGTCAAATAGTAACGGTGATAATAAGTATGGTGTCAATTACAATTGGTGATGAGAAAAAGTT  
 CCAAGCTACCATTGCGCCACTTGGTGCAACTTTGGTAGACCTGAAGGTAAACGGCCAATCAG  
 TCGTTCAAGGTTATTCAAACGTACAAGACTATTTAACAGATGGTAACATGATGGGCGCTACA  
 GTTGGTCGTTATGCCAACCGTATCGCCAAGGGTGTTTTTCAGCCTGGATGATGGTCCTCACA  
 GTTAACTGTAAACAATTGTGGTAACACAAATCACAGCAGTATCAGTTCCTTAAATCTTAAAGC  
 AGTACAAGGCGTCCCTGTTGAGAATCCTTCCAAGGGCGTTACGTTGTTGAATTTAAATTTG  
 TTGGATGATCACACACAGCCCAACCCTAACGAGTTTCCAGGTGACTTGGAAAGTCACAGTGAA  
 GTACACTTTGAATGTTGCAGAAATGACTTTAGACATGGAATACCAAGCACAGTTAGTTCGTG  
 GTGATGCTACTCCAATTAATATGACCAACCACTCGTATTTTAACTTGAACAAAGTCAAGAGT  
 GAGAAGTCCATTCGTGGTACAGAAGTTAAGGTCTGCTCGAACAAATCGCTTGAAGTTACAGA  
 GGGGCATTGCTTCCAACCTGGTAAGATCATTGAAAGGAACATTGCTACTTTTGATTCAACTA  
 AGCCACCGTTTTGCATGAAGATACTCCGGTCTTTGATTGCACTTTCATTATTGACGCTAAC  
 AAGGATTTGAAGACTACAGATTCGTGAGTGTCAACAAATTTGGTTCCTGTTTTTAAAGCCTA  
 TCATCCCGAATCTCACATCAAATTTGAGGTTTCGACGACAGAACCAACCGTTCATTTGTACA  
 CCGGTGATAATTTATGTGGCAAATTTGTGCCAAGGTCTGGATTTGCCGTTACAGCAAGGTAGA  
 TACGTTGATGCTATCAACCGTGATGAGTGGAGAGGTTGTGTTCTTCTGAAGCGCGGCGAGGT  
 ATACACTTCAAAGACTCAGTACAAATTCGATATTTAG

>YHR169W 0.74 Cold

ATGGCAGACTTTAAATCTTTAGGTCTTTCAAATGGCTTACGGAATCCTTAAGAGCTATGAA  
AATTACTCAGCCAACCGCTATCCAAAAGGCTTGTATTCCCAAATCTTAGAAGGAAGAGATT  
GTATTGGTGGTGCCAAGACTGGTCTGGTAAAACCTATTGCATTTGCAGGGCCTATGCTGACT  
AAATGGTCCGAAGATCCGTCAGGGATGTTTGGAGTGGTCTTGACCCCAACCAGAGAGTTAGC  
CATGCAAATTTGCCGAACAATTTACTGCACCTGGTAGCAGTATGAACATTCGCGTGTGAGTTA  
TAGTTGGTGGTGAAAGCATCGTTCAGCAGGCATTGGATTTACAAAGGAAGCCGCACTTTATT  
ATTGCCACGCCTGGACGTCTGGCACATCATATCATGAGCAGCGGAGATGATACCGTTGGAGG  
GCTAATGAGAGCTAAATATTTAGTTCTAGATGAAGCCGATATTTTGCTAACTAGCACGTTTG  
CCGATCATTTAGCAACATGTATAAGTGCTCTACCTCCCAAGGATAAGAGACAAACACTTCTA  
TTCCTGCAACTATAACGGACCAAGTAAAGTCGTTACAAAATGCACCAGTGCAGAAAGGGAA  
ACCCCATTTGTTGCTTACCAAGTAGAAAGTGTAGATAATGTGGCTATTCATCGACGTTGA  
AAATAGAGTATATCTTGGTTCAGAACACGTCAAAGAAGCATATTTGTACCAATTATTAACA  
TGCGAGGAATATGAGAATAAAAACCGCTATAATATTTGTAATAGAACAAATGACCGCGGAGAT  
CCTTAGAAGAACCCTGAAGCAGTTGGAAGTGAAGGTAGCGTCGTTGCACTCTCAAATGCCCC  
AACAGGAAAGAACAATTCCTTACATAGATTTGAGCTAACGCTGCAAGAATCCTCATCGCT  
ACAGATGTAGCATCCAGAGGTTGGATATCCCAACTGTTGAGCTTGTAGTGAATTACGATAT  
ACCTTCAGACCCAGATGTATTCATCCATAGATCTGGTCTGACGGCCCGTCTGGCAGAATTG  
GTGACGCCATATCATTCGTTACCCAGCGAGATGTTTCTAGGATACAGGCCATTGAGGACCGT  
ATCAACAAGAAGATGACAGAGACAAACAAGGTACACGATACCGCTGTAATAAGAAAAGCCTT  
GACCAAGGTAACCAAGGCGAAGAGGGAATCGCTGATGGCAATGCAAAAAGAAAACCTCGGTG  
AGAGAAAAGACAGCAAAAAGAAGCAAAATGACGGGAAAAGTTTGCCTCTTGA

>YDL236W 0.75 Cold

ATGACTGCTCAACAAGGTGTACCAATAAAGATAACCAATAAGGAGATTGCTCAAGAATTCTT  
GGACAAATATGACACGTTTTCTGTTGATTGTGATGGTGTATTATGGTTAGGTTCTCAAGCAT  
TACCATACACCCGGAAATTTCAAACCTTTTGAAGCAATTGGGCAAAACAACCTGATCTTCGTT  
ACGAATAACTCTACCAAGTCCCGTTTTAGCATACACGAAAAAGTTTGCTTCGTTTGGTATTGA  
TGTCAAAGAAGAACAGATTTTTCACCTCTGGTTATGCGTCAGCTGTTTATATTCGTGACTTTC  
TGAAATTGCAGCCTGGCAAAAGATAAGGTATGGGTATTTGGAGAAAGCGGTATTGGTGAAGAA  
TTGAAACTAATGGGGTACGAATCTCTAGGAGGTGCCGATTCAGATTGGATACGCCGTTGGA  
TGCAGCTAAATCACCATTTTTTGGTGAACGGCCTTGATAAAGGATGTTAGTTGTGTTATTGCTG  
GGTTAGACACGAAGGTAAATTACCACCGTTTGGCTGTTACACTGCAGTATTTGCAGAAGGAT  
TCTGTTCACTTTGTTGGTACAAATGTTGATTCTACTTTCCCGCAAAAGGGTTATACATTTCC  
CGGTGCAGGCTCCATGATTGAATCATTGGCATTCTCATCTAATAGGAGGCCATCGTACTGTG  
GTAAGCCAAATCAAATATGCTAAACAGCATTATATCGGCATTCAACCTGGATAGATCAAAG  
TGCTGTATGGTTGGTGCAGATTAAACACCGATATGAAATTCGGTGTGAAAGGTGGGTTAGG  
TGGCACACTACTCGTTTTGAGTGGTATTGAAACCGAAGAGAGAGCCTTGAAGATTTGCGCAG  
ATTATCCAAGACCTAAATTTTACATTGATAAACTTGGTGACATCTACACCTTAACCAATAAT  
GAGTTATAG

>YOR329C 0.75 Cold

ATGTCGTTTTGATTGGCTTAATGTTCCGGGATTGGACTTAAGCAGCGGGACCAAGCAGAAAA  
GAGGCCATCGAATGGATTAGGACCACCAGTGTGTCTTTTGATTTTGGTATAAATACTGCTG  
CTCCACATGATTCCAGCTTTTGGGATCAGGGATCAAGAAGTCACAGTGATACAACCTTTGTCT  
TACAGAAATAATCACTCAAATACAGCAGCTGATAATGCCACTAACGTGAGCTCTCCTCAAAA  
GGATAATCCACCTAATGGGGAGGTACGAACACTTCTGGAGGCGATGTGTACGCGGAGTCAC  
CAGAAGACATGCAAGTCCCATTGTCTTTATCACAAAACCACTTACCCATGAAGAAATAAGG  
ACATATCTAAGATGGTACCACTATATATGTTTGAGAACCATGGAAAACCTAGTAAGATTGAA  
CGACGTGTTTAGGTTCTTGACCAATTTTAAATTTATCACAAAAGTAAAAGATAGAATTGTGG  
AAATTTTCCGTAGCTGTAAAAATGCGTTAAATATTGGTCAATTTTTCGCTGTTTAAAGATTA  
GTTTCTAGAGCTATTATATATGGCATCTTACCTCTAAGACGCATGATCTTGGAAAAGGCACC  
TGTTCCAAACCACGTCCTATCCTAAGTAGTGAGAATCACGAAGAGGTGTACGAGGAGGTGG  
AAGACGATGATAGTTCTGCCAAAACCTGGTGATCAAAAGGTGCGATTTTGACTCATTGTCTCA  
TTGCTGTTGACTGGTAAGACAACGAGAAAAAGAGTCAGGAGAAGAATCAAAAATTTGAATTT  
TAAGAGTAAGAAGGTTAGGTTTTCAGAGCATATAACATTTCAAGACCTCCAAACCTCAATC  
AAGAATCATCTAATAATAGTGAAGCAAGAAAAGCAAGATCCTGATGCAGAAGATGAAGATCAG  
GATCTAATAATGACAGTCCCTTGGATTTTACATTGCCCATGGATCAATTATTAAGAGGCT

ATATAAGCGGAGAAAAACAGCGGATTAGTTTCGAGTTTGCCAGCGAACAACAAGAACTG  
 AGGAGGAGAAGAAAGTTTTGGAGGATATGAAGGATTCCTTGTCCCATTTCAAACAAATACAG  
 ACTGTTGATTCTGCCTCATTGCCAATTTTCATCGGTATTTTTACAGAATGGCAATACTCTACC  
 AACTAGCAATGTGAATAACACCCTGTTCCACAGCAACTCCGTTAGAACCTTTGAAGCCAA  
 CCGCCACAGGTTACGTAATCACCTGGTGCAGAGAAGAATATAATCAGGGGTTGCATCCAAGC  
 AACGGTGCCATCCAACAGGTTTACAACCTTAAAACCAACAGCAACGGGCTCTGCAAATTA  
 TTTGATGCGAAGTCATATGGAACAACCTCAGTCTATCAAACCTTCGAGTACACCAGAAACAG  
 TTACAAACTCTGGGGGACTTCAACCTTTGAAACCTACCGCCACAGGTTCTGCAAATTACTTG  
 ATGAAACAGCATATCTCACCTTCAGTTAATAACCCAGTATCTTCGATGTTTCAGGCGCAATT  
 TACGAACCAATCTTCATCTCCACAAAGTACAGGACCAGCATTTCTGAATTCTCCGAACATTA  
 CTCTTCCTCAAAGCAATCAACAGCAACCTTACCAAGAGGTTAATCCGACTCAAGCGAAAATT  
 GAACCATCTAACATATCGCCTCAACACACCTACTCTAACAAATGTTTCGGATTAATAATGGTAA  
 CATCGTATCCATGCCGAAAGTAGAAATAACTGGTGCATTTCCCCCTCAAACACTCTTCCTC  
 AACATCAGCAATCGCATTTGCTTTCTCCTCAAATACGATCCCGCAGCACCAACGGTCGCAA  
 TTGATATCTCCACAAAATACCTTCACTCAAATCAGCCCATTCTTTCTCCGCAACATACTTA  
 TTCCAATAATCAAGCAACAATGATATCCCCCAGAATACGTATACTAATAATCAACAGCAGC  
 CCCAACATCTTCCACCTCCTCCACCTCCACGCGCTCAGCAGCAGCAACAAGGGGCCATTGTG  
 CCACCTCAACATATGTAATCTAACGTGCAAAAGCAGAATAATTTGGTGCCGACCCAACCTC  
 CTATACAAATTCACCAAGCATAACAATCTCCAAATTTTTTGTACCTCAGAATGCTGCTAATA  
 GTTACTTTCAATCTTTACTTTCTTCTTACCATCTCCAAATCCTACGCCATCAAATGCGTCT  
 ACTGTTAATGGCAATAACGCCAGTAATGGCATAAGTTCATTCCAAAATACTAGTGCGGCAAT  
 GAACAATACTCAATCTCATCAGACGTATATTCAGCAGCAACAACAACAACAACAACTCAACAAC  
 GAATATATGGTGGCAACTTTCTCAAATGCAACAACATCCGGGGCAACTTCACTTAAACAAC  
 AGTGATATACATAGCCAACCTAACAAGCCTAATTACGGAATGCTAGGGCAGCAAGTTCATCA  
 ACAGCAACAGCAACAGCAGCAGCAATTTCCATTCAGTGCAGATGTTAATAGATCCAATTCAA  
 GCGATATTTTTGGGTAACCTTGCAGTCATTGCAGCAGCAAGTCGATGCTTTACAAATCCAATAT  
 AATAGGAGACCATAG

>YKR103W 0.79 Cold

ATGATAAAAAATGGTACATGCCCTTATTGGGAACGTGATGATCTTTTCGGAATGTGCTAGGCG  
 AGAATATATCGAGTTTAAATTTCTCTATTTATATTGTTGACTGGTATGATATACGCGTTTTT  
 GCAAAGTCTTTTCGAGCCTTTTATCTAAGGGGAAAAATCATACAAATGAAGCGCCAGAATTT  
 GAAGAACAAGGTAATGGAAACCACGAATATGCAAGGTTCTCAGTTTTAAGACTAAAATCTGC  
 ATGGGAAAGCCGTAGCTTTTGTAAATGTTAATAATAGATCTACTTTTCGACAAATTCAAAAAT  
 TTATAGAGGGTGCCTTTCATTGTTTTGCAGCTTACTATCCACCTGTATATTTTATCTAGTATG  
 CCAATGGATAACAAAAAGTTCTTTCACCAAGTTTTTCTGGTTCAAATGTTTCTCTGGATTTT  
 ACTGCTTGTGTTATTACACTTCGTTTAAATTTTCAGCAAGCCAGTCATTTTCGGTGGGTTTTAG  
 CATGTAAGCGTGATTTATGGGCTGTTTTCGTTTTACTCATATGCATCCCTGTTTACTCTTTTCG  
 ATTTTACCTCTTCGTTCCGTCCTTTCATTGGAAAGATAAAAAGATAAAAATTATGGTCAAATATAT  
 CATTTCCGAGACTTTTCATTGATTTAGCGCTTTTATTATTATTAATCAACGTCAAGTATAGAAG  
 GAAC TAGG TACTCATTTTTGGTTGAAAATGAGAACA AAAAGTTGCCACCGGCTCCTACCGTC  
 TTTGGCCTTCTTACTTTTTCTAGGATTGATCGGCTTATTTGGAAAGCATACAACACTGCCT  
 TGGAAACGCTGATATTTGGGATTTGGATATTAATAATAAGTCTATAGCAATTTTGGCGAAT  
 TTGAAATGTCTTCTAAAAAAGGAAGGCTCCTTCCAACATTAATTTGTTATTTAAGGCTGTT  
 TTCATCTCCCAATTAATTTCTGGCTTTTGTATCTAGTTTTTTGAACTTTGTACCCTCATGTT  
 GATGCCAAGAATACTATCATACTAATGACCCAAAGTCAAATCATGGAACCTTGGTGTCTT  
 TATACGTCTCATCTATGCTCGTCAGTAAAATCATTGCCACGACTTGTAGAGGTC AAGGATTG  
 TTTT TAGGTGAAAAGGTTACTATGCAACTAAGAACAGTTTGTATATCCAATATCTATCCAA  
 AACCTTAAAGAACAATTTCTAAAAGACTCAACAACGTCACTTCAAAAAAATGCGTCAACAT  
 CCTTTGAAGAAAATCCTGACTTCTGAAGCGGAACCTAGAAAAAAGTCTAGTAGGAAAAGAC  
 AACTCTGTGAACAATGTTATGTCAATTGACGCTTCAAGGTTTCTGAAGCTATGAACACTTT  
 TTATCTGGCATGTGAAGCAGTTTTCATGACAGTTACGGCCCTAATGATACTATATCCCTAC  
 TGGGATGGTCCGCCTTTGTGTTACCTTTGCTCTTCTTGGCATGATTCTTTGAATTTTGG  
 TGTGCAACTTTTTACGGGAACATCAGGCCGATCAATTAATCCTAACTGACAAGCGTACCTC  
 TGGGATTAGTGAGGCTCTGAACTCAATACGTGTAATAAAGCTACTGGCATGGGAAAATCTGT  
 TTTATCAAAGATTTATAAACGTAAGAGATGGGGAAATAAAGACTCCTTAAAAAGAAGGCAACA  
 ATTTCTTTTTGAACCATCTCATTTGGTTCTTTGGGCCACTTTGGTCTCTGCAATAACATT

CTCAGTGTTTATTAAATTCAAAATCAGACACTTACTCCTACAATAGCATTTACAGCTCTTT  
 CTTTATTTGCAATATTGAGGACACCCATGGACCAAATTGCTTCGACTGTCAGCCTTTTGATA  
 CAGTCTTTTATTTCTCTTGAAAGAATCCAGGATTATCTTAATGAATCAGAAACAAGAAAATA  
 TGAGATTTTGGAAACAAAGCAATACTAAATTTGGCTTTGAAGATGCAAGCATGGAATGGGAAG  
 CTGCTGAAACAAGTTTTAAACTTAAGAACATTTCTATTGATTTTAAGCTGAATAGTCTCAAC  
 GCAATTATAGGTCCGACTGGGTGAGGAAAGTCTTCGCTATTACTTGGACTATTGGGAGAATT  
 GAACCTTCTTTCTGGAAAAATATACGTACCTACAGTTGAATCCCAGCAGACTTAGAGATTG  
 GTAAAGACGGAATGACGAATTCATGGCATAATTGTTCTCAAACCTCCGTGGTTGATTAGTGGA  
 ACAATTAAGATAACGTTGTTTTGGAGAAATCTTCAACAAACAAAAATTTGATGATGTAAT  
 GAAATCCTGTTGCTTGACAAAGATATCAAAGCAATGACAGCTGGCATAAGAACAGACGTGG  
 GTGATGGAGGATTTTCTTATCTGGCGGACAGCAGCAAAGGATTGCTTTAGCCAGAGCAATT  
 TACTCCTCTTCCAGGATTTTGATCCTTGATGATTGCTTGAGTGCAGTAGATCCTGAAACTGC  
 ACTTTATATATATGAAGAGTGTATGCGGCCCATGATGAAAGGAAGGACCTGCATCATT  
 CGAGTCATAATATTTCTTTAGTTACGAAACGGGCTGACTGGCTTGTGATTTTAGATCGTGGC  
 GAGGTGAAATCACAGGTAAACCATCGGACCTCATTAAATCTAATGAGTTTTTGAGGGAAAG  
 CATAACAATGATTCAAAAAATACAACCTACAATCAAATGACTTGAAAAGATCAACAACAT  
 CAAAGAAAACCTAAGAATGGAGATCCCAGGGAGGGAACCTCGCAAGACGAAGTGTGTGCTGAA  
 GTTGAAAATTTTGAGGAAACAAAAATGGAAGGATCAGTTAAATTTTCAGCTTACAAATGGTT  
 AGCAGACTATTTGGGGGACTGGGAGTTGTTTTGTTTTCACCTCGTCTCCATCCTTATTC  
 ATGGAATCACACTGTCTCAGGGCTTTTGGCTCAGATACTGGCTGGACACTGGATCTTCAGGG  
 AGTAAGTCTACCTGGCTTTATAGAATAGTTGAGGGTCACTCTAACATCTATTTCTTACTGAC  
 TTATATTATCATAGGTCTTGTTCCTTCAATTTTAACTTCTGGTAAAGTTTGATAGCAATAA  
 TTTTCAGGTACCAACGTCACCAAGAAAATATTTGCGAAGCTTCTATCCAGTATCTTATATGCC  
 AAGTTACGTTTTTCATAATGTCACGCCGACTGGAAGAATAATGAACAGATTTAGCAAGGATAT  
 GGATATTATTGATCAACAATTGATCCCTAATTTGCGAAGGACTCTCTTATAGCGTCTGTTT  
 GTCTGTGGATTATACTTTTAAATGGATATGTTACTCCTCAATTTCTGTTATTTGCTATTCCCT  
 TTATGCGCTCTTTATTATACCGTATGTACGTTATATCTTCGTGCATCTAGAGAGTTGAAGAG  
 AATAGATAACATCAATATCTCTCAATACACCAGTTATTTCGCTGAAGCCATCAAAGGAGTAA  
 CTACAATTAGAGCATTAGCAGATGAGCGTAGGTTTTATCACTCAATCTTTGGTTGCAATTGAC  
 AGAAGTAATGCTCCATTTTTTTTATCTCAATATGGCCACCGAGTGGATCACATATAGAGTGG  
 TATAATTGGGACACTTGTCTTTTTTAGTTCTTCTGTAATGATCATAATGAAGGCCTCATAG

>YMR005W 0.82 Cold

ATGGCAAATTCGCCGAAAAAGCCATCTGATGGCACTGGAGTATCAGCGTCAGACACGCCTAA  
 ATATCAACATACCGTCCCAGAAACGAAACCAGCATTAAATTTGTACCAGGTAAAGCTAGTG  
 AGCTATCACATAGCCTTCCGTCGCCTAGCCAGATAAAAATCAACCGCACATGTATCTTCAACT  
 CACAATGATGCGGCAGGTAATACGGATGATTCGTCTTCTTCTTAAATGTATCACCCACAAC  
 TAATTTGAGAGTTGAAAGTAATGGAGATACAAACAATATGTTCTCTAGCCCTGCTGGACTAG  
 CTCTACCAAAAAAGGATGATAAAAAAAAAAACAAGGGTACGAGTAAAGCAGATTCTAAAGAT  
 GGCAAAGCATCCAACCTCCTCAGGACAGAATGCACAACAACATCAGACCCAAATAAAATGCA  
 AGATGTCCTTTTTTCCGCAGGTATCGATGTTAGGGAGGAGGAGGCTCTCTAAATTCATCTA  
 TTAATGCCTCAAAATCCCAAGTTCAAACAAATAACGTTAAGATCCCCAACCATTTACCATTCT  
 CTTACCCGGAAACAAGTTTCCAATTATATGAGGAAAGTCGAAAAGAGCAAAACTTCAACCT  
 GACCCCTACAAAGAATCCTGAAATTTTGGACATGATGTCAAGTGCCTGCGAAAACCTATATGA  
 GAGATATCCTAACAAATGCCATTGTCATCTCCCGACATAGAAGAAAAGCAGTCAAGATAAAT  
 TCTGGTAGAAGAAGTGAAGTTCTGCGGCTTTAAGAGCCATTGCACTAATTCAAAAAAAAGA  
 AGAAGAAAGGCGTGTGAAAAAAGAATTGCGTTGGGACTCGAGAAGGAAGATTATGAAAATA  
 AGATTGATTCCGAAGAGACGTTACACAGAGCATCGAACGTTACGGCTGGCCTTAGAGCAGGT  
 AGTAAAAACAGTATGGTTGGCTAACTTCATCAGTAAATAAGCCGACGTCCTTGGGAGCAAA  
 ATCTTCAGGCAAAGTCGCCTCCGACATCACGGCTAGAGGAGAAAGTGGGCTAAAGTTTAGAG  
 AAGCTAGAGAGGAGCCTGGTATAGTAATGAGGGATTTACTCTTTGCTCTCGAAAATAGGCCG  
 AACAGCGTTCAGACTATTATTTCAAAGGGTTATGCCAAGATCAGAGATTAA

>YJR093C 0.79 Cold

ATGAGCTCCAGTGAAGACGAAGACGACAAGTTCTTGTATGGTTCCGACTCCGAATTAGCACT  
 ACCTTCATCTAAACGATCAAGAGATGATGAAGCAGACGCAGGTGCGTCCAGTAATCCTGATA  
 TAGTTAAAAGGCAAAAATTCGACTCTCCCGTGAAGAAAACCTCCAGCTACTGCCAGAGATGAT

CGTTC TGATGAAGATATCTACTCTGACTCCTCAGATGACGATAGTGATTCTGACCTAGAGGT  
TATCATAAGTCTGGGTCCTGACCCTACTAGGTTAGATGCAAACTACTCGATTCTTATTCTA  
CCGCAGCGACATCTTCAAGCAAAGACGTAATTAGCGTAGCTACAGATGTATCCAATACCATC  
ACAAAGACATCAGATGAAAGACTAATAACAGAAGGAGAAGCAAATCAAGGTGTAACGGCAAC  
GACCGTAAAAGCTACAGAGAGCGATGGAAATGTACCGAAAAGCAATGACTGGTTCATAGACC  
TGGATAAAGAGGGAATCTTTGATAGTGTTGGCATAACGACAATAGATCCTGAAGTATTAAG  
GAGAAACCCTGGAGGCAACCGGGGCCAACTTAAGTGATTATTTCAATTACGGTTTTAACGA  
ATTTACCTGGATGGAGTATTTACATAGACAGGAAAACTACAACAAGATTATAATCCTAGGA  
GGATCCTAATGGGCCTATTATCCCTCCAACAGCAAGGGAAGTTGAATTCGCGAATGATACA  
GACTCAAACCTCGGTAATATAATTGATAACAACAACGTAACAATGCAAATATGTCATA  
TCTGAACAGTAATATGGGTAATAGTATGTCTGGAACACCAAACCCTCCCGCTCCACCAATGC  
ATCCAAGCTTCCACCCTTACCTATGTTTGGTAGCTTTCCACCATTCCCCATGCCAGGTATG  
ATGCCACCCATGAACCAACAGCCTAATCAAAATCAAAATCAAAATTCGAAATGA

>YKL012W 0.82 Cold

ATGTC TATTTGGAAGGAAGCTAAAGATGCAAGTGGAAGGATATATTATTACAATACTTTGAC  
AAAGAAATCTACGTGGGAGAAGCCCAAGGAAC TAAATTTCTCAGGAGGAGCTACTTCTTCGAG  
AAAAATGGCTGGAAGGCGGCCAAGACGGCAGACGGCAAAGTATACTATTATAATCCAACAACA  
AGAGAAACCAGCTGGACTATTCCGGCCTTCGAGAAGAAAAGTAGAACCCATCGCAGAACA AAA  
ACATGATACAGTATCCCATGCACAGGTTAATGGAAATAGAATAGCCCTTACGGCTGGAGAAA  
AACAGAGCCGGGACGAAC TATAAACGAGGAGGAAAGCCAATATGCTAATAACTCTAAACTG  
CTTAATGT CAGGAGAAGGACTAAAGAAGAAGCAGAGAAGGAATTTATTACCATGCTGAAGGA  
AAATCAAGTAGACTCTACTTGGTCATT CAGTAGAATTATTT CAGA ACTGGGGACCAGAGATC  
CAAGGTATTGGATGGTCGATGATGACCCCTTATGGAAGAAAAGAAATGTTTGAGAAATATCTT  
TCCAATAGATCAGCCGATCAACTTCTTAAAGGAACACAATGAAACAAGCAAATTCAAAAGAAGC  
CTTTCAGAAAATGTTGCAAAA CAATTTCTCATATAAAAATATTACACCCGTTGGCCTACCGCAA  
AGAGACTAATTGCCGACGAACCAATATACAAACTCCGTGGTCAATGAAAAGACAAAAGAGA  
CAGACCTTTCAAGATTATATAGATACCCTCATCGACACTCAGAAAGAATCAAAAAAAAAAATT  
GAAAACACAGGCCCTAAAAGAACTAAGAGAGTATTTAAACGGTATTATAACAACATCATCCT  
CTGAAACTTTTCATAACCTGGCAGCAGCTTTTAAATCACTATGTTTTTTGATAAGAGTAAGAGA  
TATATGGCGAACC GGCACTTCAAAGTCTTAAACCACGAAGATGTTTTAAACGAGTATCTGAA  
AATAGTAAATACGATTGAAAACGATCTTCAAACAAACTAAATGAGCTCCGACTGCGCAATT  
ATACCAGAGACCGTATTGCTAGAGATAACTTTAAAAGCTTATTAAGAGAAGTGCCAATCAA  
ATCAAAGCAAATACTAGATGGTCAGATATTTATCCTCATATAAAGTCTGATCCGCGCTTTTT  
ACATATGCTTGGAAAGGAATGGCTCGTCCTGCCTTGATTTATTTTTTAGATTTTGTGATGAAC  
AAAGGATGTACATCTTTGCACAAAGATCAATAGCCCAACAGACGTTGATAGATCAAAATTTT  
GAATGGAATGATGCCGATAGCGACGAGATCACCAAGCAAACATAGAAAAAGTTCTGGAAAA  
TGACCGGAAATTTGACAAGGTGGATAAAGAAGACATCAGTTTGATTGTTGATGGTTTTGATAA  
AGCAAAGAAACGAAAAGATACAACAGAACTCCAAAATGAGCGTAGGATATTGGAGCAAAG  
AAGCACTATTTTTGGTTACTTTTGCAAAGGACATATACAAAACCGGTAAGCCCAAGCCTAG  
TACGTGGGATTTAGCTTCAAAGAGCTTGGCGAATCTCTTGAATACAAGGCACTAGGCGATG  
AAGATAACATAAGAAGACAAATTTTCGAGGATTTTAAGCCTGAAAGCTCTGCACCGACTGCC  
GAAAGCGCTACTGCAAACCTAACGTTGACCGCGTCAAAAAGAGGCATTTAACTCCGGCTGT  
GGAATTGGACTATTGA

>YLR196W 0.8 Cold

ATGATTTCTGCTACTAATTGGGTTCCAAGAGGGTTTTCTCCTCGGAATTTCTGAAAAGTATGT  
TCTGGATGATGAGGAAGTGGAAGAATTAACCAATTAGCACAGTTGAATTTGGATGATGCTA  
AAGCTACTTTGGAAGAAGCAGAAGGCCAATCAGGTGTTGAAGATGACGCCGCAACAGGTAGT  
TCTAATAAGTTGAAGGATCAGTTGGATATAGATGATGATTTGAAAGAATATAACCTGGAAGA  
ATATGACGATGAGGAAATTGCAGATAATGAGGGTGGTAAAGACGTTTCCATGTTCCCGGGTT  
TAAGTAATGATAGCGATGTTAAATTCATGAGGGTGAAAAAGGTGAAGATCCATATATTTCA  
TTGCCAATCAAGAGGATAGTCAAGAGGAGAAGCAGGAGTTACAAGTTTACCCATCCGATAA  
TTTAGTTCTTGCTGCCGAGAACAGAAGATGACGTTTCGTATTTGGATATCTACGTTTACGATG  
ACGGTGTCTGGGTTCCACAGTAGCGATATTCCCGTTGAAGAAGGTGATGAAGCTGACCCAGAT  
GTTGCTCGTGGATTGGTTTCGTGACCCTGCAC TTTACGTTCAACCATGATTTAATGTTGCC TGC  
TTTTCCACTATGTGTTGAGTGGCTTGACTACAAGGTTGGATCCAATTCGAAGAAGCAGCCA

ATTATGCTGCCATTGGTACGTTTGATCCACAAATTGAAATTTGGAACCTGGACTGTGTTGAC  
 AAGGCCTTTCCCGATATGATTCTGGGTGAACCTCTTGATAATTCAATGGTGTCTTTGAAAAG  
 CAAAAAGAAGAAGAAGTCTAAGACTGGACACATTACTACTCATCATACCGATGCTGTTT  
 TATCCATGGCACACAACAAATATTTCCGTTCCGTTTTAGCATCCACCTCTGCAGATCATAACC  
 GTAAAACATATGGGATTTGAACTCAGGTAACGCAGCCCGCTCCTTAGCTCCATTCAATCAA  
 CAAAAATGTTTCATCATCTGAATGGCACATGTTGAATGGTCCATTCTTTTGACCGGTGGTT  
 ATGATTCTCGAGTAGCTTTAACAGATGTTAGAATTTCTGACGAAAGTCAAATGAGTAAATAC  
 TGGTCTGCCATGGCAGGTGAGGAAATAGAACTGTTACATTTGCCAGTGAAAATATAATATT  
 ATGTGGTACTGATTCTGGTAATGTGTATTCTTTCGATATTAGAAACAATGAAAACCGTAAAC  
 CAGTTTGGACATTTGAAGGCACACGATGCTGGTATCTCCACATTATGTTCAAACAAATTCATC  
 CCTGGTATGATGAGTACAGGGGCCATGGGTGAAAAGACTGTCAAATTATGGAATTTCCCCTT  
 GGATGATGCTACGAACACTAAGGGCCCAAGCATGGTTCTGTCTCGTGATTTTCGATGTCGGAA  
 ATGTATTGACATCGTCATTCGCTCCAGACATCGAGGTAGCGGGTACCATGGTCAATTTGGTGGT  
 GTCAATAAAGTTTTGAAACTATGGGACGTTTTTACCAATAGATCTGTACGTAAGAGCTTTAA  
 AAGTGAAC TAGAGAATGTTCAAGCAAGAGCAAAGAAGGCCAAAAAATAGGAAAAAGTT  
 CAAGAATCGCCAGAAAATACACCAGTAACGATAACCCAGATACTGTTATAACCATTGATGAT  
 CAAGGTGAAGATGAAGAAGAAAAGAGAAGGTGGAGATGAGCATGATGACATGGCATAA

>YLR108C 0.77 Cold

ATGTCCTGGCCAAAAGGGCGAGATCGTGGTTTATACAAAAGAGTTAGAAACTACCCCGAGCT  
 TTTACCAAACCATGAAGTTTTCAAGATTAGGATTGGCCAAAAGCTATTTGAGATCTCAGGTG  
 CTACATTGAATTCGGATGCGCCCAATTTTTTTCACCCAATTTTCAATACGCACGATAAAAAT  
 ACGATTCTATTTGTTGATAGATCGGAAGACGTGTTTCATCATAATATAACAGACATTTACAAGG  
 TTATTTTTCCCGATATTAAGAACGAAGTACAATTTACCTGTCTTTTTCGCGGACGCATTATATT  
 TTCAGTTACCCAAGTTAGTTAAACTCATAAAAAGAATACGACTACCACTTCACTAATATTGGA  
 GGTGTTCCCTTTAAGGTACCAAAATCATTATTCCATGAAGAAGGGAACCGGTTGAACTATTT  
 TGAAACGATTTCTCGCATATCTTATGAGGAAATTGAGAAGTGGGAGTCAAATAAGAAGCCGG  
 GCTTTCCACCTTTATTACCACCCTCATATATTGCAAGGTCCCCAGAATTTTTCCGAGATATA  
 TTATCTTTACTGGGCGGTTCCAAATTAGAACTGTCTGAGGAAAGAACCAGCATCTCTGATAAA  
 AGAGTGTCTGTTATTACCCTCTCAACAGGTTGGAGCAGGAATTAGTGCGGGCAAATAATATAT  
 ATAATCCCTTAAC TAATTGTCAAGAAGTTTGCATAGCTCTTGATAGCGTCTCCAAGAAGGGT  
 GTAACCATTGAAAGGTTAACATCACTTCATACCGGAAACCAATCTTTAGCGGTAAGCAGTTG  
 TCTCAATGGAAC T GAGGGTGAAAAGCCGCTACTGGATTTTCATAAAACCGAGACTGATT CAG  
 GCAACAATGATGAATATGAACCTCCAACAAAAAAGGTAAAACATTGTATTGAAAGACACTGG  
 AGCATGTTAAAATACCAAAGGCCTTATATCGATACAGTTTCGCACGATCTTATTTTTCCAATT  
 AACTCTAACCAGTGCAAAAATAATATTCAACAAAAAGAATAAGACTGTTTCATGTAGACCTAT  
 CCAGAGAGGCTGCAGTGTGTTTGTGAAAACAAGTTCTCGGATGTTTTATTGGAAGAACCCAGAT  
 TTTAAAATTGATCTGTCCGAATATAAGGTCAAACCTTCGTGACAGTCAAATGCAAGTTGAATC  
 CCACTTAATTATTCCTGCATGTGTCTCCATTTGTGACTTGACGGTAAATGGCGCAAATGCT  
 GTAATATTTTTCTCATTAGTTAACGACTCCAATGTAAGGGAGGGTCTTGATTGCACCAAT  
 TTGAAAGTTTTGAATTGCGTTCATGGTTTTGAACTACACTTATCGAAATCCATGTGGAAGCT  
 AGGTACAAATAATGGAAGAATCATTCTCGTTGCTGTAAAAGCCGAAACCTTCTCTGGGACGA  
 AGGAATATTGCAAAATGATTGATTTTTCTGTGA

>YMR288W 0.77 Cold

ATGAGTCATCCGATTCAATTTGTAAACGCTAATAATAGCGATAAGAGCCACCAATTAGGCGG  
 TCAATATTCTATTCCTCAGGATTTGAGGGAAAACCTGCAGAAAGAAGCTGCACGTATTGGTG  
 AGAACGAAAAAGATGTGCTACAGGAAAAAATGGAAC TAGGACAGTGCAAAATCGAGAGGAT  
 TCATACCACAAAAGAAGGTTTGATATGAAGTTGAGCCGGATTCCGATACACAAACTGTTAC  
 GTCTTCAGAAAAATACCAAGACGCTGTCTGTTGCAAGGAAAAGAAAATCTCGTTGGGATGTAA  
 AAGGGTACGAGCCACCTGATGAATCTTCAACAGCGGTCAAAGAAAACCTCTGATAGTGTCTTG  
 GTTAATGTAGAAGGAATCCATGATTTGATGTTTTTTAAACCTTCTGACCATAAATATTTCCG  
 CGACGTTATATCCAAAAAACCCATAGATGAGTTAAATAAGGATGAAAAGAAAGAAAGAACCC  
 TGTGATGTTACTTCTGAAAATAAAAAATGGCAATACAGCGAGTAGGAGGACTTCTATGCGG  
 ATTTTAACCGATAAAGCTGTTACATTTGGTCCAGAAATGATATTTAACCGCTTATTGCCCAT  
 ATTACTAGACAGAAGTTTGGAAGACCAGGAAAGACATCTAATGATCAAGACCATAGATCGCG  
 TCCTTTACCAGCTAGGAGATTTAACAAAACCTTACGTTTACAAAATACTTGTAGTAGCTGCC

CCATTGCTAATAGATGAAGATCCAATGGTTCGTTCAACAGGCCAGGAGATAATCACCAATCT  
 GTCTACAGTCGCTGGCCTAAAAACCATTCTAACAGTAATGAGACCTGATATTGAGAATGAGG  
 ATGAGTATGTTAGAAATGTAAC TTCAAGAGCGGCGCTGTGGTGGCAAAAAGCCCTTGGTGT  
 AATCAATTGCTTCCTTTTCATCAATGCAGCATGCCACTCACGGAAGTCTTGGAAGCAAGGCA  
 TACTGGCATAAAAAATTGTGCAGCAAATAGGTATACTTTTGGGAATAGGTGTCTTGAATCATC  
 TTACTGGGCTGATGAGTTGTATCAAAGACTGCCTAATGGATGATCACGTTCCGGTGCGAATT  
 GTTACAGCACATACTTTATCAACACTAGCAGAAAATTCTTATCCATATGGTATCGAAGTTTT  
 CAACGTTGTACTGGAGCCATTATGGAAGGGTATAAGAAGTCATCGTGGTAAAGTGCTATCTT  
 CTTTTTTAAAAGCTGTTGGATCTATGATCCCATTTGATGGACCCAGAGTATGCCGGTTATTAT  
 ACCACAGAAGCAATGAGAATAATTAGACGTGAATTCGACTCTCCCGATGATGAAATGAAAA  
 GACCATTCTTTTAGTATTACAAAAATGTAGCGCTGTAGAATCCATAACGCCAAAATTTCTGA  
 GAGAAGAAATCGCGCCAGAATTCCTTTCAAAAATTTTGGGTCAGACGAGTGGCATTGGATAGA  
 CCATTAAACAAAAGTTGTTACATATACTACTGTTACATTAGCAAAGAAATTAGGTTGTTCTTA  
 TACCATTGATAAAATTATTAACACCATTGAGAGATGAAGCTGAGCCGTTT CAGAACAATGGCTG  
 TCCATGCTGTTACTAGAACAGTAACTTATTAGGGACAGCAGATTTAGATGAGAGATTAGAA  
 ACGAGGCTTATTGATGCGCTCTTGATAGCATTTCAAGAACAACAAAATAGTGATTCTATAAT  
 CTTTAAAGGGTTTGGGGCAGTGACGGTGTCACTTGACATCCGTATGAAACCGTTTTTTAGCAC  
 CCATTGTGAGTACGATTTTAAATCATTTAAAGCATAAAAACCTCCCTTGGTTCGTCAACATGCA  
 GCAGATCTATGTGCCATACTAATACCAGTCATCAAGAACTGTCACGAATTCGAAATGTTGAA  
 TAAATTGAACATTATATTGTATGAATCCTTAGGCGAAGTATATCCAGAGGTATTAGGTTCTA  
 TAATCAACGCTATGTACTGTATTACTAGCGTAATGGATTTGGATAAACTACAACCTCCTATT  
 AATCAAATTTTACCAACCTTAACTCCAATTTTAAAGAAACAAGCATAGAAAAGTCGAAGTAAA  
 CACTATCAAATTTGTTGGACTTATTGGTAAATTAGCACCTACCTATGCACCTCCTAAAAGAA  
 GGATGAGAATATGTTTTGAACTATTAGAATTTTGAAGTACAAATAAAGAAATAAGAAGA  
 TCAGCAAATGCCACGTTTGGATTCAATTGCTGAAGCAATTGGACCTCACGATGTTCTTGTGTC  
 GTTATTGAACAATTTAAAGGTTCAAGAACGTCAGTTACGTGTATGCACGGCTGTTGCTATCG  
 GTATCGTTGCTAAAGTGTGTGGTTCCTTACAACGTGCTGCCAGTAATCATGAATGAATACACA  
 ACACCAGAGACTAATGTTCAAACGGTGTCTCAAGGCCATGTCATTCATGTTTGGAGTACAT  
 TGGTAACATGTCTAAGGATTACATATACTTCATAACACCATTATTAGAAGATGCACTCACCG  
 ATAGGGATTTAGTTCATCGTCAGACAGCGTCGAACGTAATAACCCACTTAGCTTTAAACTGT  
 TCAGGTACAGGTCACGAAGATGCCCTTCAATTCATTTAATGAATCTTCTAATACCCAATATTTT  
 TGAACCTTACCACATGCTATTATGCGTATTTTAGAAGGTTTGGAGGCACCTGAGTCAAGCTC  
 TTGGCCCTGGACTATTCAATGAAC TACATATGGGCAGGATTGTTCCATCCAGCGAAGAATGTA  
 AGGAAAGCATTTTGGAGGGTGTATAATAACATGTACGTAATGTACCAGGACGCCATGGTACC  
 TTTTACCCCGTTACACCAGACAACAATGAAGAATATATAGAAGAACTGGATTTAGTTCGT  
 GA

>YJL108C 0.78 Cold

ATGATTGTTTTCATTTGGTGATGCAACAACAAGAACTTCCGAAGTTCAATTGGTTAGGTGTAC  
 TCAAGGTCTAAACCTTTGGAAGCTGCATCAAGTTCATGCCGTTTACAAAAGAGTTGTCCATG  
 ATACCTTAGGTGCCGATGAAGGTAATGCTTTACTCGATCAAATTTTGGCTGACACGAATCTA  
 TATCCACCTTGGATGTGTGTTCTTTTATATGCATTTTGTTCGCTATGGTCACTCCGTATGC  
 CTTTGGTGGCGATTGGGTAAACCTGGCAATCTCATTTTTTATGGGGCTTTGTGTGGGGTCAT  
 TACAATTTATTCTTTCACAAAAGTCATACATGTATTCAAACGTCTTCGAAATTTCTGCATCT  
 ATTGTCGTTAGCTTCTGCGGTAGAGCTTTTGGCTCTATCCCTCGTTCTCACATCTGCTTTGG  
 TGCAGTTACACAAGGCTCATTGGCATTAACTCTGCCAGGTTATATTATCTGTGTGGTGCAC  
 TAGAACTGCAAAGTCGAAGCCTAGTTGCTGGCGCGGTCCGTATGTTCTACGCCATTATTTAT  
 TCTTTGTTTTTTGGGTTTTGGCATAACATTGGGCTCAGCTTTGTTTGGATGGATGTATCACAA  
 TGCCACTAACGAAATTTCAATGTCCTCAATTAATTTCTCCGTGGTTT CAGGTTCCCTCTTCGTT  
 CAGCGTTTACCATTAGTATCTCGTTATTAATCAAGCACACATCTCACAACCTGCCAGTTATG  
 GTCTTCATTTCTTGCACCGGTTATGTCGTAACATATTGGGCCGGTAAGCATTTTGCGAATTC  
 GACAGAGTTTACTGCCGCCTTAGCTGCATTTGTCATAGGTGTTTTAGGTAATCTATATTCCA  
 GAATTTGGAAGGTTT TAGCGGTATCAGCTATGCTTCCCGCAATCTTCGTTCAAGTGCCATCT  
 GGTATTGCTTCACAAAATTCGTTGTTGTCTGGGTTGCAAAGTGCAAATACAATTGTTAATGC  
 TAATGAAACCATTACGACAAGCACCTCCGATCCATCGTCCCTCAATGTCAATTTGGTATGACAA  
 TGATTCAGTTTGTGTGCGGTATTTCTGTGGGACTATTTGCTTCTTCACTCTTTGTCTACCC  
 TTTGGTAAAAAGAAAACCTGGTCTTTTCAGTTTATAA

>YDR259C 0.75 Cold

ATGCAAAACCCCTCCGTTGATTCGTCCCGATATGTATAATCAGGGAAGCAGCTCAATGGCTAC  
 TTATAATGCCTCTGAGAAGAATCTAAATGAGCATCCTTCTCCGCAAATGCACAGCCAGCA  
 CGTCCCAAAAGTTACCTTATAGAATAAATCCTACAACCACTAATGGGGACACCGACATATCT  
 GTTAACAGCAATCCTATCCAGCCTCCTTTGCCAAACTTGATGCATCTATCTGGTCCGCTGA  
 CTATAGATCGATGCATCAAAGTCCTATACATCCATCTTATATCATCCCTCCGCATTCAAATG  
 AAAGAAAACAATCAGCTTCTTACAACAGACCTCAAATGCTCATGTTAGTATTCAACCTTCC  
 GTGGTATTCCCCCTAAAAGTTATTCCATATCTTATGCACCTTATCAAATAAATCCCCCTT  
 ACCAAATGGACTTCCGAACCAGAGCATATCTTTGAATAAGGAGTATATTGCAGAGGAGCAAC  
 TATCAACCCTCCCATCTCGCAATACCAGTGTTACTACTGCACCTCCTTCTTTTCAAAACAGT  
 GCTGATACCGCTAAAAATTCAGCTGATAATAATGATAATAATGATAATGTAACCAAACCTGT  
 TCCTGATAAAGACACCCAACCTCATAAGTAGTTCAGGCAAAACTTTAAGAAATACTAGAAGAG  
 CTGCTCAAAATAGAACCCTCAAAAGGCATTTAGACAAAGGAAAGAAAAATACATCAAGAAT  
 CTCGAACAAAAATCAAAGATATTTGACGATTTACTAGCAGAAAATAATAACTTCAAATCATT  
 AAACGATTCATTAAGAAATGACAACAACATTTTAATAGCTCAGCATGAAGCTATAAGGAATG  
 CAATTACTATGTTAAGAAGTGAGTATGATGTCCTTATGTAACGAAAACAACATGTTGAAGAAT  
 GAGAATAGTATAATAAAAAATGAACACAACATGTCAAGAAATGAAAATGAAAACCTAAAACCT  
 TGAGAATAAACGCTTCCACGCTGAATATATACGAATGATCGAGGATATTGAAAATACTAAAA  
 GAAAGGAACAAGAACAACGAGATGAAATAGAGCAACTAAAAAAAAAAAAATAAGATCCCTGGAG  
 GAAATAGTAGGGAGACACTCGGATAGTGCCACGTAA

>YOR310C 0.79 Cold

ATGGCTTACGTTTTAACTGAAACTTCAGCTGGTTATGCTCTTTTTAAAAGCTTCCGATAAGAA  
 AATCTACAAATCTTCAAGCTTAATTCAAGACTTGGATAGCTCTGACAAAAGTCTTGAAGGAAT  
 TCAAGATCGCCGCCTTTTCCAAGTTCAACTCTGCAGCTAACGCTTTAGAGGAAGCCAACCTCC  
 ATTATTGAAGGTAAAGTTTTCTTCCAATTAGAAAACTTCTGGAAGAAATTA AAAAAGGACAA  
 GAAGTGCACCTTGATTGTTAGTGAAACTAAACTGGCAAACGCTATTAATAAGTTGGGATTGA  
 ACTTCAATGTTGTTCCGATGCTGTAACCTTAGATATCTATAGAGCTATCAAAGAATATTTG  
 CCAGAATTGCTGCCAGGTATGCTGATAATGATCTAAGCAAGATGTCTTTGGGTTTAGCTCA  
 TTCCATCGGTGCTCACAATTA AAAATTTCTGCTGACAAAAGTTGATGTTATGATTATTC AAG  
 CAATTGCTTTTATTGGATGATTTAGATAAAGAATTAACACATATGCCATGAGATGTAAAGAA  
 TGGTACGGGTGGCACTTTTCTGAGTTAGCTAAGATTGTTACTGATTCCGTCGCTTATGCGAG  
 AATTATTCTAACAATGGGTATCAGATCCAAGGCTTCTGAAACAGATTTGAGTGAAATCTTAC  
 CAGAAGAGATTGAAGAACGTGTCAAACCGCTGCTGAAGTGTCTATGGGTACTGAAATCACT  
 CAAACCGATCTAGACAACATTAATGCTTTAGCTGAACAAATAGTCGAATTTGCCGCTTACAG  
 AGAACAGTTGTCCAATTACTTGTCTGCAAGAATGAAGGCTATTGCTCCAAACTTGACTCAGT  
 TGGTTGGTGAATTAGTTGGTGCTAGACTTATCGCTCATTGAGTTTCTTAATTTCTTGGCC  
 AAATCACCAGCTTCTACCATCCAATATTAGGTGCCGAAAAGGCTTTATTAGAGCTTTAAA  
 GACCAAGCATGATACACCAAAGTATGGTTTGTATATCATGCCTCTCTTGTGGTCAAGCTA  
 CTGGTAAGAACAAGGTAAGATTGCAAGAGTCTGGCTGCTAAGGCCGCTGTCTCATTGCGT  
 TATGATGCTTTAGCTGAAGATAGAGACGATTCAGGTGACATGGTCTAGAATCAAGAGCCAA  
 AGTAGAAAATAGATTATCCCAATTAGAAGGTAGAGATTTAAGAACTACTCCAAGGTTGTTT  
 GTGAGGCTAAGAAGGTGGAAATGACTGAAGCTAGGGCCTACAATGCAGATGCTGATACCGCA  
 AAGGCTGCTTCTGATTCTGAATCCGATTCTGATGATGAAGAGGAAGAAAAGAAAAGAA  
 AGAAAAGAAGAGAAAGAGAGACGATGATGAAGATTC AAGGATTC TAAAAAAGCTAAGAAGG  
 AAAAGAAGGACAAGAAGGAAAAGAAGGAAAAGAAGGAAAAGAAGGAGAAGAAAAGAGAAGAA  
 GAGAAGAAGGAAAAGAAGTCCAAGAAAAGAGAAGAAAAGAGAAGAAATAA

>YNL011C 0.79 Cold

ATGAACGTCGTTGTGTGCTCCGGTGGGACTGCCACAAATTCATTGACTCCTTGCTTTTCTAA  
 TATTTCTATCTTAAAAGGACATGAGCTGACGTATATATTGCCAATATCAGATAATGGCGGGT  
 CCACAAGTGAAATCTACGAATAGTTGGTGGCCAGCAATGGTGATATCAGATCTAGAATA  
 GTGAGACTACTTCAAGATGAACAGCTTGTGCGAGTTGTTTGGCCATAGGCTACCTAATGATAA  
 GTTATTAGCTAAGAAAGAATGGAATGAAATAGTGGAAGGTTCCGCATCCCATATGGAAAAATA  
 TTTGATAGAAGTTAAGGAAATGTGTCGTTCTTTTATTATCCATATGCAAGCAGAACTCTTG  
 AAAAAATCAAACACTCGAATCCATTTAGTTGAGAGTGCATCCATTGGAATTTTTTCTT



AACTGGTGCTAGATTGTTTTTAGGTTCTCTAGACGCATCTATTGAACTAATGATGAGGATAG  
 GAAGGTGCAGTCCCTCTAGTTCATGTTATTCCATGTATAAATACCAATCACACACATCATATC  
 TCGGCTTTGTTGACGAATGGTGAGATGATAACTGGCCAATCACAAATATCGCATCCCTCGAA  
 ATCTGTTCCCTAAAGATAATAGCATAGCACATTCAGCTAAATTTATTCATTTACTTGGCTCTT  
 ATGACGACCATTTGAAAATTCCTCCTCGACGATGAGGAAGAAGAAGCGGAAGAGGAGTATGCC  
 AATCCTATCTATATTCTTCCAGAACTGAAAACTCCCAGTTGCATTTTGACAAGCTTGATGA  
 ATCACAGAATCTACCTGCTCCGGTACATAGGATATTGTATATAAACCATATGGCGAAGAGA  
 TAAAACCAATGGGAAATCCAAGAGCTATTTCCAAGGTGAAAAAGCTGACATGGTCGTTTAT  
 TCTATCGGTTCTTTAATGACAAGTTTACTCCCAATCCTTATTCTTGGTAATCTTGCTGAAGT  
 AATTTTGGAACTAATAATACGAAAAAGTTTGGCTCATAAATAATAAATATGATAGAGAGG  
 TTTTGGTTTAGACGGTTTACACTACGTTCAAATGATCATAGATTCTATGAGTAGGGCAATA  
 GCAGGCTATAGGCAATCTAAGGGTGTCCATTCAGAGAATGATGACTTTGAATGGCAAGATTT  
 TATTACTGATATTGTTTACCTAAAAAATGGTGAAATTGAAATTGATGAAACGATATTCGAGA  
 AGCATAGTATTAGATGCCACCAGATCGCGTCTTCGGATAAGATGGAAAGTGAAGAACTTGAA  
 AAGTTCTGAATCAAATTGGCCTTAAAACTGA

>YKL025C 0.77 Cold

ATGGACAAAATCAATCCTGATTGGGCGAAGGATATTCCGTGCAGAAATATCACTATTTATGG  
 CTACTGCAAAAAGGAGAAAGAAGGTTGCCCTTTCAAACACAGCGATAAACACTACCGCTACTA  
 CCATAAATGACGTTCCCTCCTCCAATAGATGTGGGTGAGGCTACAACCTCCGACCATGACATCA  
 GTTCCCTAAGTTCAATGCTAAAGTATCCGCAAGTTTCACTCCGATGACAGTCGGTAGTGACTC  
 CTTAACCCTGTGACGAATACCACCTCCGCTGCTACAAATGCTACTGGCAATATCGCCATGG  
 CAGCTACCTCTGCTACTGCTTCTACAGTTAATCCGATGATTAATCCGATAGTTAATAGCTCG  
 TTAGTGAATAACAATAACAATAATAGTAATATAAGCATATCAATACCAACTACCGCTTCGAG  
 TTCCAATTACGACCCCTTCAATGCCCCCATTTTCACTCCGTCTTCAACCTCCTCAATTCACA  
 CTAATGCAAAATGCACATTCTTTTCCATTTCCCTCCATTGCAAATTTCTGGTGGCATAAAATATA  
 AACGCCACTGATGATAATAGTAACAATATGAGTATGGCTAATAATGTGCCACCTCCTATGCA  
 ACCGCCACCATAGAGAGTAGTAATCTTAAGTACCCACGTATTTATCCGCCTCCTCACAGTC  
 TTCTACAGTATCACCTATATGCACCTGAACAGCCATCATCATTGAAATCATTATTAAGCCT  
 AATGAAAGGTCTGCAGATCAGCTTTTTCATTTCAAACAATATTAGAGAAGATTTAACCAAGAA  
 AAACCTTATCGATTTTGCAGGTTTCCCTCTTTCAGGTAAAGTTATACCAAGTATTGTACAAG  
 ATTATTTTAATTTGGTTCCATTGAACTTCAATAATAACGATTTTTTAAATAAAACTACGCTC  
 TTCAAAGTTTTTTCCAATTATGACGGTAAAGCCTACGTTTTGAAGAGGCTTCCTAACATCGA  
 TAAGTCAATGAATCCAACAATAATATCCAAAATATATCAGATATGGTCAAAAATTAATTGTA  
 CAAATTTGATAAAGTTTAGGGACATTTTTCAAACACTACTAAATTTGGTGATCTGTCTATTTGT  
 TTGGTCTTTGACTACTACCCAAACTCGCTATCTTTGTATGATTACCCTTTGTTAATTTCCC  
 TAAGTTTCCAATAACGAATAAATTTATTTATGGATATATTTAGTTCAACTACCAATGTAATAA  
 ACTCTATCCATTCACAAAACCTTGAGTATTGGCAATACATTAACCTGGAGAAAAGTTTTGATT  
 ACTGGGGACCCAGGGAGAATCAAGTTATCACACTGCAATTTTATGGACCTTTTTGTTCAATGA  
 TGATACTGATAACCGTAGTATCTTCCGGCGGAAGTACCATAGAGGGACAACAACAGCTAGACT  
 ACAATATTTAGGAGAGCTATTTAACCCTATCCATTAATATTGAAAACCTCTAATAACAAC  
 ACTGCCCTAAAGAATATCGATTGGAGGAAATAACCCCTCAATCAATTGATGACATGAGACA  
 GATCGATGATAAGTTCAAGGATGTACTCAAGTATCTGATATCAGACAACGGCGATTCCAAAA  
 AGAGCATTATGATCTTACTAGTCACTTTTATGATAAGATGTTTATGGTCCCTGGAATCGTCA  
 CAAACCTATACAGAATACATGGAGTCTGTCTTATCAAGAGAACTAGAAAATGGCAGATTATT  
 TAGGCTGGTCAACAAGCTAAATTCATTTTTGGTGAATCGAATCAAGAATAGACATAAATT  
 GGTCCGAATCTGGGACTAAATTCCTCATTACTATTTTATGACTACGTATTCCATCAAGTG  
 GATTTCGAATGGGAAACCAATAATGGATTTAATCATGTCTTAAGATGTTTGAACAAATTAGA  
 CGCTGGTATTCAAGAAAAGTTAATGTTGGTAACGCCCGATGAGTTAAACTGTATTATTATAT  
 CCTATAAGGAGTTGAAGGACTTGATAGAATCCACCTTTCGATCCATCACCCAATAA

>YDR002W 0.82 Cold

ATGTCTAGCGAAGATAAGAAACCTGTCGTCGACAAGAAGGAAGAGGCTGCTCCAAAGCCACC  
 ATCCTCTGCTGTCTTCTCCATGTTTGGTGGTAAGAAGGCCGAAAAGCCAGAAACCAAGAAAG  
 ACGAAGAAGATACCAAGGAGGAAACCAAGAAGGAAGGTGATGATGCTCCAGAATCACCGAT  
 ATCCATTTTGAACCAGTGGTTCACCTGGAAAAGGTAGATGTTAAGACAATGGAAGAAGACGA  
 AGAAGTTCTTTACAAGGTGAGAGCCAAGCTTTTCAGATTCGATGCCGATGCCAAGGAATGGA

AAGAAAGAGGTACTGGTACTGTAAGTTCTTGAAGAACAAAAAGACTAACAAGGTTAGAATA  
 TTGATGAGAAGAGACAAGACCTTAAAGATTTGTGCTAACCACATCATTGCTCCAGAATACAC  
 TTTGAAGCCTAACGTTGGTTCTGATAGATCTTGGGTGTATGCTTGTACAGCAGATATTGCAG  
 AAGGTGAAGCAGAAGCCTTCACTTTTGTATCAGATTTGGCAGTAAGGAAAATGCTGATAAA  
 TTTAAAGAAGAATTTGAAAAAGCTCAAGAAATCAACAAAAAGGCTTAG

>YDR164C 0.81 Cold

ATGCTGATTTAATTGAATTACAGAGGAACATTTTGATAGGGGTTTTGAATCAGATTGAGAC  
 GAAAAATAACTTGAAGTTTCTTATTATCGATAAAACTGTGGAGACAATATTGAGTTATCTTT  
 TCCTCACACCCCAAGAACTTTTAAATAATGTCACATCTGTTGATTTGATTGATTCCCCAACA  
 AGAAAAGGACAATCCTCCATCGAGGCAATTTACATATTGGAACCAACGAAATATAACATCAA  
 TTGTATCGATGCTGACTTCATGGTAAGACCACCTAAGTACAGAAGATGTCACATCAGATTTT  
 TACCAGGATTAACAAACCCTATATTTTCAGTTTTTTTCAATCAAAACGTTACATTGCTCAAAAT  
 TTGGAGTCATTTAAGCCGATCGAACTAGGGTTTTTCGTCAAAGAATCTCAATTTCTCGAAAC  
 TTTACAAATGGAACACTCATTACAGGTTTTTTTCAACAACAACCTGTAAGGCTTTGATTCCTA  
 CTAACGTGAGGAAGATTGTAGGCTCACTAGTTAGTTTTGTGTGTTATTACGGGGGAATATCCG  
 ATTGTTAGATATTTCTGTATCTAATCCTGTGGAAGAGGAAGATGCCCGCAATGGAAACGCCGT  
 AGTCAACGCAAAATCTTTAACAAGGTCTATTGCAAACGCTTTCCAAATAGCGATAGATACAT  
 ACGCTCGCAATAATCCAGATTTCCCTCCTCAAAACACTGAAAGACCGCGTTCCATTCTAATA  
 ATCACCGATAGAACACTGGACCCTTTTGCGCCAATATTACATGATTTTAGCTATCAAGCAAT  
 GGCTTATGACCTGGTAGCTAATGTGGACACACAAAAAGATATATATCATTATTCTGCCGAGA  
 ATGAAGCTGGTGAGCAAGAGGAAAAGTTTTCAAAATTGGTAGATTTGTATGATCCTGACTGG  
 ATTGATTTGAAACATCAGCATATTATGGATGCCAACGAATATATTCAAGGAAGAATCAAGGA  
 ACTGATTGCTAAAAACCCTCTGCTGGTTGATAGATCGAACGTAAAGAATACTACCGATCTGC  
 TGAGTGTCTGATGACGACCTGAAAGATTTTGTGTAAGAAAAGAAGGCTGATTTTGCATAAG  
 ACACTGGTAGATGAATGCCTAGGAGAGAACCGGAAAGAAAATTAGCGGATATTTCTGCTAT  
 TGAACAAAACCTATCCGGATTTGGAATGGATTTTAGTGGTGAGAAGATAAAGCATATTATCG  
 ATGATCTCTTACCAGCGTTAGCAATGAAGGAACCGACAATCTTAGATAAAATTGCGTTACATT  
 ATTGCGTATGCTCTTTTTAGAGGTGGAATTTATCGAGTTAGACTTCATTAAATTATTGAACTT  
 TATAGGAGTTACTCATGAACATGAAAATTTCCAGCAATATTTAAAAATATTCAGAAATTACG  
 ATTTAATTGATTTCAAATTTGATCAAAGACAAACCGAAGGATAAACCATTTCAAAGGAATGG  
 TTTTCATGATACTTTAGTGAATGATCCAAATATCTATCACACTTCAAGGTTGCTTCCCGCTGT  
 AGGGAATATTCTTTCAAAGGTTATAGCGAATCCATTGTTATTGAGCGAACAATACTTCCCAT  
 ATTTAAAGGACAAGCCAATTGAGTTATTGAATGAAGAAGAATTCCAAGCAGGCTTAGCGAAT  
 ACCTCTGCTAACTCCTCCTCATCCTTAAGGAATCCCCGTCACAAGGCAGCTTGGACCACGAA  
 AAGCTCTAATATAAAAAAAACATACCTAGACAAAGATTCTTCTACTATGTTATTGGTGTA  
 TATCAATTTCCGAAATTAAGCTGCTTATGATCAATCAAACCTGAAGAACAGAGATATCTTT  
 ATTTGGCAGCGACGAGATATTAACACCAACAAAATTTCTTAGATGAAGTGAACGTTTACAAA  
 TCCTAGAGAATTTTTCAAATTCAGGAAGATCAGCGCCAGCAAGTAAACCCGCCTGATTTCC  
 TTCTAAGGGAAATGAAACCGGTGGCACAACCAGTCTCTCATGTTCAATTTAAAAGCCAAGAC  
 AATAGTCTAAGTCTGGTACTTCTAGTCCCAAAGCAGCAGGTTCTCTCAAGTCAGAACCACC  
 CGAAAAGAGAAGAAACGTAGCAAATTTCTCGAGGTTCTTGAAGAAAATCTCACCATGATA  
 AATGA

>YNL084C 0.79 Cold

ATGCCCAAGTTGGAACAATTTGAAATAAAAAAATACTGGCAAATCTTCTCGGGTTTGAAACC  
 AATAGAGAATAAGGTAACCATGACCAGGTTTTACCAATCTTTATAATTCCAAATTAGATT  
 CATCGGTTCTAAACAAGATTTGGTTTTTAGCTGATATTGATGACGACGACAATTTAGACTTT  
 GAGGAATTTGTAATTTGCATGAGATTAATATTTGATATGGTTAATAAAAAACATTAGCTCTGT  
 TCCAGATGAATTGCCTGATTGGTTGATTCCAGGGAGTAAGGTGAATCTAATCAAAGAAAGAA  
 AGAAGCGCAAAGCAAATAGAAAACGCAGACTTGCCTCCAAAGAAGGAAATCAAAGTAGATTGG  
 TACATGTCTCCAGATGATTTGAATCAATATGAAAAATTTATAATAGCTGTGCAAAACTAAC  
 CGATGGTACTATTACATTCAACGAACTGTCAACAAAACCTTCCACAAAATTTTTTAACATCA  
 GTAAGACAGATTTAAATAAGGTTTGGAGTTAATTAACCCACAAAATTTGCCATCAATTGAT  
 AGAGATCCTACTTTTTATTTTATTTCACTGTTAAGACAAAAGAAATGATTTGGGTGCTGAAAT  
 TCCAGCAAGTTTACCAAATTTCTCTGGCGGAGGTGTGCAATAAAAAACAACCTGAGCTATGATT  
 TACGGTCTCTCAACCTCCTACAAAGAGAAAAGAAGAAGCTAACGAAGTGGACAATCTCGCT

GACAATGGGCAGAACTCGAGTTCGGATAGCAGTGGCAGTAACGTGCTTCAAATGAAGACAG  
 TATAAAGCAAAAATATGCTTCTCTGACAGATGATCAAGTTGCGAACATGAGAGAACAATTAG  
 AAGGCCTTTTGAAC TACAAAAGAGTAAAAAACTCAAGGAGGCTCAAAACTTTCTAAGCGG  
 ATTAACATCAGGTCGATAACTGATGACTTGGATAACATTGAACAGCAGGTTGAAGTATTGGA  
 GAATTACTTGAACAATAAGAGACACGAATTGCAAGCATTACAAGCAGAAATCAATTGA

>YGL259W 0.79 Cold

ATGCAATTGTTTTCCATCCTCTCTTTGTTGTCATCATTGATGTGTTTCATTGACCGTTTTAGG  
 GTCTTCCGCAAGTTCCTATGTTAAGTTTTCTGTTCAAAAAGTTTGCTGATATTATAAATATAG  
 GCACACAGGATGTTTCTACCGTCTTCAAAAAGAAATGAGGTTCTTAACACCACAGTGATAAAT  
 GGAATAGGAGTGTATGTTGTCAAGATGGAAATCGGAACGCCCTCCACAAACGGTGTACCTACA  
 GTTAGATACTGGCTCTTCAGATATGATTGTGAATAATGCTGACATTGCCCTATTGCAAAATCGA  
 TGTCTGACGGATCTGACTACGCTTCAACTGATAATTACGAACTCACGGCAACATTCACTGGG  
 CCTCGTTCTACTACCACCTCACCAGAGCTTATAACTGTCCGCTCTTATAGGGGTAAAATTC  
 AATGCAAGAACTCATCTACTTTTAAGAATAACGCGACTTTCTTCAATGACATATACGTATT  
 AG

>YPL208W 0.81 Cold

ATGTCATCAGATGCGTTAAAAGCACTACTTCAGTGGGGTGCCTCATTGTTGTTAATAGTGCC  
 AGAGGAACTCAAGTTTTTATATACCGATCTTAAGGGCATTATTTGCGTATGTGAAAAAGATA  
 TAGACAATCCCAGCATCAAGATTCCTCCCGAGATTGTCATTTCAAGGAATCTGCCCATGAAG  
 TTTTTTGGGCTAAGTGAATCCACTAAGAATATCAACGGATGGCTGAAGTTGTTCTTTCGCAA  
 AATAAAATTTGATAGGGATAATGATACTATCGTGGACAATGTTTCGTGTGAATGATAAAATTTA  
 AACCTTACTTGGATGCATTGCCCTTCCCGCTAAATTCGCCCTTGGTCTGGAACCCAAGCGAG  
 TTGAAGCGTTTATCATCTACAAACATAGGGAAATTCGATTTCATGAAAAGTTCGAAGGTATATT  
 TAAAGAGTGGTTTGAAGTGGTCAAGTTCCTCAGATATGTTTGACTTGGAAAAGAGTGGCAGATG  
 ATGTGCAGACCTCCATAATCTCGATGAGTTGACATATGAGGCTTTGTATGAGAAGATTTTG  
 AAGATAACAGAACTTCAAAGACCAACTATCTGGTATTCTTTTCCCTGCATTTTTATGGTCGCA  
 CCTTATATTTCATTTCAAGAGCATTCCTTGAATATGTGCTAAACAGAAAAGTTCCTGACAAC  
 CTATTGTACTGCTTCCCATCGTCGATCTTCTAAATCATGACTACCGTTCCAAAGTCAAATGG  
 TATCCTGAAAATGGGTGGTCTGTTATGAAAAAATCGGTACCGCCTCCCAATCACGAGA  
 ATCAAATAATTATGGCGGTAAGGAAATGAGGAGTTACTCTCTGGATATGGATTTGTTTTAG  
 AAGACAACATATTTGACTCAGTGGCTTTGAAAGTTAAATTCGCATTAGATGTGGTATCTACA  
 ATCTTTGAAACAGAACCTAGTTTGAAGCTGCCCTTACTTTTCGGATTACACCACTTATGCTTT  
 TGA  
 AACAAGACTGTGTCCAGCAAGAAAAGAGGCTACTCGTAGTGCTACAGACTACATCA  
 ATGGGGTGACTTACTTTCATTAACATACAAAATGAACAATGTTTGAACCATTACTGGATCTT  
 TTTACCTACCTTCTAAGGCCGAAGAGGAGGATCTACACGATTTGAGAGCCCGTTTGCAGGG  
 TATACAAATGCTACGAAATGCATTGCAGAGCAAACCTCAACAGCATTACTGGACCACCTGCAA  
 CTGATGACTCTTATGCAATTGATCCTTACAGAGTCTATTGTGCTGACGTTTATACTAAAGGT  
 CAAAAACAATTTTAAAAGAGGCTTTAACGAGGTTGAAAAAACTAGAAAAACAATGCTGTG  
 AGAGAACAAGCACCAATTGCTAACCATGAGCAAATTCCTAAGAATGACCCTGCTTTTGCAG  
 AAATGAATTACCTTCGCTGTTTCAGCAACGAAGATGGTGAAGAGGTCATCTTTGAATCTACT  
 TATGATTTATTGATACTTTGGATTCTACTGAAAACGAAAAAGAATTCTTACCCACCAAATA  
 TGAATGGGTTGGACAGCAGTATACTAATTTCAAGCAAACCTGCATATATTTAGATGATGCCA  
 AGGCTTTCCATACTGCATACTTCGAGAAGCAAGACGATGTGGATTTGGCCGAAGTAGATCAT  
 GCGATTCAGTTTGTAGTAGACAATTCCTTTACCAGAACTTCATCTACAACCGAAGAGACTAT  
 TTTAGTACGTAAGTAG

>YBR280C 0.73 Cold

ATGAGTGAAGTTGAGAGCAGAGAAAAGGAGCCTGACGCAGGATTGTCCCCAGATATCGTTCA  
 AGCTACGCTACCATTTTTAAGCAGTGATGATATTAAGAACCCTCGCAGACAAATAAGTATT  
 ATAATACATTACTAGATTTTGGCCACTCTAAAATTTTGTGGCATGAACTATTTTATAAGGCA  
 TTTGGGACATTAAGACAAATGACGAGCCTTCCAGGGTCGAAATTCGGCGGAATTTAAGAC  
 CTGCACAGAGACGATTTAAGAGAAGCATTCCCACCTTGTTCATGGCAGGAAGTATAACCAAT  
 TACGGGCATATGATGCAAAGTTTTATAGTTGGGGTTATTTAAAGCATGGAAGGTTGGGCTAT  
 ACCGCGAGTTCCAATAATGAACTTGTTCGCCACTTCACTAAACGGGCCAAGTCCGCGGTTCAA  
 ATATGGTGTCAATACCCCACTGAAGTTCTTGGTTTAAACAGTAGGACAACATCTAGAACTA

GTAAC TTC ACT CCTTCAGAGGACCCGTTAAGCGCCATCAAGAAGGATGGAGACGAAATCATA  
GCTCAAGTATCTAGTGGTGGTTTTCTTTCCAAATATTGACTGAGTCAGGTAACCTTTACAG  
CAGCGGATCCACTTTTTCTGGAGGGTTAAAAGGACCAGGTCAGTGGTTCACAGCATGATT  
ATAATCCCTTCAGAGAAATGATTCACAATATGGAAAGATCGTATCCGCGGATCACTAGCCGC  
AGTAATGGGAGTACTGTCAATACCACGGGTACATTTTTCTGGAAGGAGAATGAGCGGTAGCCA  
TCCATCTACTGCTTATGAACCAGGAAATGCAACTACAGCTCAGCATATTACCATAGATAGCG  
GAGGTGCGCCTGCAGCCTCTCCCGGAGGGAGCCATAGTGGTGTCCCTAGA ACTACAATGCCT  
TCAATGGGGCCGCATGAGAATATTTACAGCCAGATAGAAATGCTGGAACGAAGTGCTAACAA  
GGCTGTACCAGGAAATAATCATATCAGGAGAATGTTTCGCAAGAAATTTCTTTCCATTATATA  
GTGGTAGGGATGAAAATTTAGGATCATTTAATGATATTCAATTTGTTCGCGGTAAGCTCTGGG  
AGAAGTCATTTCTTAGCAATGGATACAGATAACAATATTTATTCTTGGGACTCAACGGAATC  
TGACCAAGGTGTCAAATTTGAGTTTGCTAACCTACCTAGTCGTGCTACGAATCCTATTTTGA  
AAATTTGCTAGTGGTTGGAATTTCAATTTGTTGCTATATATATAAGGTCGGGTTGGTTGCATGG  
AAAGAAAGAGATGCTATTTCAAAGGGCGAGAGCTTTGCTTTTGCAAAAATACGAGATTGTCCC  
GAATACGAATGATGTTAATGGAGACTCCAGGATTGTGACTTTGCATGTTTACAAGATAACT  
GCGTTTTCTTCATTAATAACAACGGCGATAAACTATGGAAGTACCACAATGGACTGAACCAG  
ATAGTAGATTTAAATATTGTTCGAAAACCTGTGCAAAATTAACGCCTGTTTTGCTTCATTAGT  
CCTCTTCACCGATACTCACTGTTATACTTTGAAAGTAACAAATGGAGATGTCGATAAAAGATA  
GTTTAACGGAGCTAGACATCAATGAAAATGTTATCTCCGTTGCAAGTGGTGACTATCACACG  
GTGGCACTAACCGAACGCGGTCAATTTGTATTCATGGGGTATTGAAAGTCAGGATTGTGGGTG  
CTTAGGATTGGGCCCTTCTGAAAAAATAGTTAACGAGCTACATATTGGCAATTTGGGAAGGGC  
AAAGAAACATTAGGGTCGTTAAGCCCACGAAAATAGA ACTACCTGAAGATTATATTTGTGTG  
AGTGTAAC TGCTGGTGGCTGGCAAACCGGTGCATTAATCATCAAGAAGCATTGA

>YLR144C 0.76 Cold

ATGTGTTACAGTAGGCAAGCCATTCCTCCACCTGTTCCCTAATAGACCTGGCGGTA CTACCAA  
TAGAGGACCTCCTCCCTTACCACCTCGCGCAAATGTTTCAGCCACCAGTTTGTTCCTTCTGAGA  
ACTCCAGTAAACCTCGAGAAAAATAGGGTGGCAGGTGAATCACTGCGCACACCAAGCAGTTCT  
AACCTTTTAGCTGACAGCCAGGTGAATAGTGACAATATTTTTCAATCACCTGTCTTTCTAA  
CTTAAAAGCTCCTCCTTCCGCTTCAACAAAGTTCAACACCCGGTACCAAAGCCGAATATTG  
ATGATCAATCTGTTGATCCATTGGAGACAAACAAGTTCTACACAAACATGTTATTAGACGAT  
AATACACAACCTATATGGACACATCCTTATTCAATTTGGTTTTCTCGTGATCCAGAATTGTT  
TGGTTTGGCCGCAATCATACTTTAGCGTCTCAAAGGGTTTTTGATACA ACTACAAATCCTC  
CCAGATTCTACTTCAATCCACAAATATAAAATCATTTGTATTCAAGGCCAGGGAATTTGTC  
TCTTCAAATGATATCAAGCTTGAATTCGGGATATGAAACATATGTCCATGTGCTTACTAAT  
GTCTTTGAGTAGTTCCCAGTTTATAGAATTCCTCGTGGTTCAGGGGATGGGCTTTGTCACGG  
CTATTTACCACGATTTGGGTTTTGAATTAAGAAGCGCCGTTGGTTTTCAGGAGCTTAGAGCGC  
ATAAGCGTGAATGAAAGATATGGTAAATATAATATACAACTTGAGAATAATAGGAATTGGAT  
ACTTTATTTGACCTCACCTGATTACTCTTTTCCACAAGATTTTCAAATTTCACTACTCGACA  
GCAATACAATAATATCATCTCATAAAATCAATGGTCTTATCTGTCAATTATCTGCAGACTCC  
GTCCCAGTATTGACATGGCAGCGGGCTGTTATCCAGTATACTGTGACCTATCAGGGCAAAC  
TGTTGATGAACATTTACAAATTAACAGATTTAACTATAACGGTTGCAGGCTACTCGCAGTCTG  
GAACTACTCTAATGTATGCTTTACCACATCATAAAGCGGCATTACACCAGAAATGCAGGAA  
CGTGA AATTGCCTCAAGCCTGGATTCCACAGTTAAAGGCTTAATGACTGGTTATCTCACAAA  
CAGTTTTGATATGCAGGTTCAAGTACCTCAAGAATTGGGCTTTGAACCTGTGCGGTTATCTT  
TGAATAAGAAGGCAGATTACAGTCAAGAAAAGCTATCTAAAATTCGGAAGCTGCTGTTCAA  
GAAGTTCAATTGAGTGACCCCTCAACAAGAATCAAACATAGATTCTATGTATTTCTCTGGTAA  
GATACTTGCAAAGTATGCGTGGATTCTTTATGTGACACATTACATCCTTCATGATGAAAATT  
TAACAAAAGAATTATTATCTAAACTGACTATTGCAATGGAGAGATTATCAGCAATCAGCAA  
GTCTTACCTTTAAATTACGACGTTAGTTGGAAAGGCATAATTTTCATCAGGCTCTTCTAGCCA  
AGACTTTGGTAACTCTTATTATAATGATCATCATTTTCATTACTCTTATCATGTACATAACGG  
CTGCCATTATCTCTTTAGTCGATTCTGATTTAAGTGGAGTTACTAACAACCTCTGGTTAGAA  
AATAATAGAGATTGGGTTGAGTGCTTAATTAGAGATTACTCTGGTGTGACAACGATGATCC  
GTACTTCCCTCAATTTAGGTCATTTGATTGGTTAATGGCCATTCATGGGCCAAAGGACTAT  
TTCCAAGTGGTGACGGTAAAGATGAAGAATCTACTTCAGAAGATGTCAATTTCTTGCTATGCG  
ATAAAATTTGTGGGGTTGGTAACTGGA AATCTAAGTTAACTGACATAGCGA ACTTACAAC  
CGGCATCATGAGAAATGTTTTCCAGAGCTACTTCTATACGAAAGCAATAACTGTCCAAC

CGAAAGAATTTATTGGTAATAAAGTTAGTGGTATTTTATTCGAAAATAAAATTGATCACGCC  
 ACGTATTTTGGCATGGAGCCTCAATACATTCATATGATTCACGCCATTCTATAACATCAGC  
 ATCTTCATGGGTGAGAACACCAAATTTTGTCAAAGAGGAGTGGGAAGAAAAAATGCAGCCGA  
 TAATTGATCAAGTGAATGACGGTTGGAAAGGAATAATCATGTTAAATATGGCTCTGCTTGAT  
 CCAAATTTTTCGTACGACTTTTTCAGCCAACCTGATTTCAACAGAAATTCCTAGACAATGG  
 GCAAAGCTTAACTTGGTCTTTAGCTTATTCAGGTGCTTTTTCTTAG

>YDL140C 0.75 Cold

ATGGTAGGACAACAGTATTCTAGTGCTCCACTCCGTACAGTAAAAGAGGTCCAATTCGGTCT  
 TTTCTCACCTGAAGAAGTTAGAGCAATCAGTGTGGCCAAAATTAGATTTCCAGAGACAATGG  
 ATGAAACCCAGACGAGAGCGAAAATTGGTGGTCTAAACGACCCTAGGTTAGGCTCTATTGAT  
 CGTAATCTGAAGTGTCAAACCTTGTCAAGAGGGTATGAACGAATGTCCTGGTCATTTTGGTCA  
 CATAGATTTAGCAAAACCTGTATTTTCATGTTGGTTTTATTGCCAAAATTAAGAAAGTATGTG  
 AGTGTGTCTGTATGCACTGTGGTAAGCTATTACTGGATGAACATAATGAATTAATGAGACAA  
 GCTCTAGCAATCAAAGACAGTAAAAAAGGTTTGGCTGCAATTTGGACTTTATGTA AAAACAA  
 AATGGTCTGCGAAACAGATGTCCCTTCTGAAGATGATCCTACTCAGCTCGTATCAAGGGGAG  
 GTTGTGGTAATACACAGCCTACAATTCGTAAGGATGGGTTGAAATTAGTTGGTAGTTGGAAA  
 AAAGATAGAGCCACGGGGGATGCGGATGAACCAGA ACTAAGAGTTTTAAGTACGGAGGAAAT  
 CTTGAATATTTTTAAGCATATCTCAGTAAAAGACTTCACTAGTTTGGGTTTCAACGAAGTTT  
 TTTCTCGTCCAGAATGGATGATTTTAAACATGCCTTCTGTCCACCACCACCGGTGCGTCCA  
 TCCATTTCTTCAATGAATCTCAAAGAGGTGAGGATGATTTAACCTTTAAACTTGCTGATAT  
 TTTAAAAGCTAATATTAGTTTGGAAACACTAGAGCATAACGGTGCTCCACATCATGCTATTG  
 AAGAAGCAGAGAGTTTATTACAATTTTCATGTTGCCACTTATATGGATAATGATATTGCTGGT  
 CAACCACAAGCTCTTCAAAGTCCGGCCGTCCCGTTAAATCTATTTCGTGCTCGTTTGAAGGG  
 TAAAGAGGGTCTGATCAGAGGTAATTTAATGGGTAAGCGTGTGGATTTTTCGGCAAGA ACTG  
 TTATTTCTGGTGATCCTAATTTGGAATTAGACCAAGTCCGGTGTTCCAAATCTATTGCCAAG  
 ACTTTAACATACCCAGAAGTGGTCACACCATATAACATAGATCGTCTGACGCAACTTGTTAG  
 GAATGGACC AAAATGAGCACCCCGGTGCCAAAATACGTCAATTCGTGATAGCGGAGACCGTATAG  
 ATTTAAGATACAGTAAAAGGGCAGGTGATATTCAATTACAGTATGGGTGAAAGTTGAACGT  
 CATATTTATGGACAATGATCCAGTTTTTATTCAACCGTCAACCTTTCGTTGCACAAAATGTCCAT  
 GATGGCCACAGAGTAAAAGTTATTCCATATTCTACATTTAGATTGAATTTGTCCGTTACAT  
 CTCCATACAATGCCGATTTTCGACGGTGACGAAATGAATCTTACGTTCTCAGTCTGAGGAA  
 ACAAGGGCGGAACTTTCTCAATTATGTGCTGTTCTCTGCAAATTTGTTTACCACAATCTAA  
 CAAACCTTGTATGGGTATTGTTCAAGATACTTTGTGTGGTATTTCGTAAACTGACATTAAGAG  
 ATACATTTATAGA ACTTGATCAAGTTTTGAATATGCTTTATTGGGTTCCAGATTGGGATGGT  
 GTTATTCCGACACCTGCAATTATCAAGCCCAAACCTTTGTGGTCCGGTAAACAAAATCTTGTG  
 TGTGGCTATCCCAAACGGTATTCATTTACAACGTTTTTGATGAGGGCACTACTCTGCTTTCTC  
 CAAAGGATAATGGTATGCTTATTATTGACGGTCAAATCAATTTTTGGTGTAGTAGAGAAAAA  
 ACCGTTGGTTCTTCCAATGGTGGTTTAAATTCATGTTGTTACGAGAGAAAAGGGACCTCAAGT  
 TTGTGCTAAGTTGTTTGGTAACATACAGAAAGTTGTTAACTTTTGGTTACTACATAATGGGT  
 TTTCAACAGGTATTGGTGATACCATTGCGGACGGCCCAACAATGAGGGAAATTACAGAGACA  
 ATTGCAAGAGGCTAAAAGAAAGTTTTGGATGTTACGAAAGAAGCCAGGCAAACCTTATTGAC  
 TGCTAAACATGGTATGACTCTCCGTGAGTCTTTTGAGGATAACGTTGTTTCGGTTCTTAAATG  
 AAGCAAGAGATAAGGCAGGTCTTTAGCTGAAGTCAATTTGAAAGATTTGAACAATGTGAAA  
 CAAATGGTTATGGCAGGTTCCAAGGGTTCAATTTAATAATATCGCGCAAATGTCAGCTTGTGT  
 AGGACAGCAATCTGTTGAAGGTAAACGTATTGCTTTTGGGTTTCGTTGATCGTACCTTACCTC  
 ATTTCTCTAAAGATGATTACTCCCAGAGTCTAAAGGTTTTGTTGAGAACTCATATTTGAGA  
 GGTTTGACCCACAAGAATTTTTTTTCCATGCAATGGGTGGTTCGTGAAGGTCTTATCGATAC  
 CGCCGTCAAACAGCCGAAACAGGTTATATTCAACGTTCGTTAGTGAAAGCTCTAGAAGATA  
 TCATGGTTCATTACGATAACACCACAAGAACTCATTGGGTAACGTTATTTCAGTTTATTTAT  
 GGTGAAGATGGTATGGATGCTGCGCATATTGAAAAGCAATCGCTAGATACTATTGGTGGCTC  
 CGATGCAGCTTTTGAAGAGATAACAGAGTTGATTTATTGAATACAGACCATAACCTTGATC  
 CCTCACTATTGGAATCCGGATCTGAGATACTTGGCGATTGAAACTTCAAGTTCTCCTGGAT  
 GAAGAATACAAACAATTAGTGAAAGATCGTAAATTTTTGAGGGAAGTTTTGTTGATGGTGA  
 AGCAAACCTGGCCATTACCAGTCAACATAAGACGTATTATTCAAATGCTCAACAACTTTCC  
 ACATAGATCATACGAAACCATCTGATTTAAACAATCAAAGACATCGTTCTTGGTGTAAAGGAT  
 TTGCAAGAAA ACTTATTAGTGTGCGTGGTAAGAATGAAATTTATACAAAATGCCAGCGAGA

TGCAGTTACATTGTTCTGCTGTTTATTACGTTCCCGTTTGGCCACACGTAGAGTTCTACAAG  
 AGTACAGACTAACAAAACAGGCATTTCGATTGGGTATTAAGTAATATCGAGGCACAATTCCTC  
 CGTTCGTGTTGTTACCCTGGTCAAATGGTTGGTGTCTAGCAGCCCAATCCATTGGTGAACC  
 AGCCACACAAATGACCCTTAACACCTTCCATTTTGCTGGTGTGCTTCCAAAAAGTTACTT  
 CTGGTGTCCCCGTTTAAAGGAAATTTTGAATGTGGCCAAAAACATGAAAACCCCTTCCCTG  
 ACTGTATACTTAGAGCCTGGTCATGCTGCCGATCAAGAACAAGCGAAGTTGATCAGATCTGC  
 TATCGAGCATAACACTTTAAAGAGTGTCACTATTGCTTCAGAAATTTACTATGATCCTGATC  
 CACGTTCCACAGTTATTCCAGAAGATGAAGAAATTTATCCAACCTTCATTTCTCATTATTGGAT  
 GAAGAGGCTGAACAATCTTTTGACCAACAATCACCTTGGTTATTACGTCTGGAACCTGGATCG  
 TGCAGCAATGAATGATAAAGACTTAACAATGGGTGAGGTTGGTCAAAGAATCAAGCAAACAT  
 TCAAAAATGATTTGTTTGTATCTGGTCTGAAGACAACGATGAGAAGTTGATCATCCGTTGT  
 CGTGTGTTGTTCCGTTCAAAGTCACTAGATGCTGAGACTGAAGCAGAAGAAGATCATATGTTGAA  
 GAAAATTGAGAACACAATGTTAGAGAATATTACATTACGTGGTGTAGAGAACATCGAGCGTG  
 TTGTCATGATGAAATATGACCGTAAAGTACCAAGTCCAACCTGGTGAATACGTTAAGGAACCT  
 GAATGGGTGTTGGAACAGATGGTGTAACTTATCTGAAGTTATGACTGTTCCCTGGTATCGA  
 CCCAACCGAATCTATACCAACTCCTTCATTGATATAATGGAAGTTCTAGGTATTGAAGCTG  
 GTCGTGCAGCCTTGTATAAAGAAGTTTACAATGTTATTGCTTCTGATGGTTCGTATGTTAAC  
 TACCGTCATATGGCTTTGTTAGTCGATGTTATGACAACCCAAGGTGGCTTAACTTCTGTTAC  
 TCGTCATGGTTTCAACAGATCAAATACAGGTGCCTTAATGAGATGTTTCAATTTGAAGAACTG  
 TCGAAATTTTGTGTTGAAGCTGGTGTTCAGCCGAATTAGATGATTGTCGTGGTGTTCGGAA  
 AATGTCATTCTTGGTCAAATGGCTCCAATCGGTACCGGTGCATTTGATGTGATGATCGATGA  
 GGAGTCACTGGTAAAATACATGCCAGAACAATAAATAACTGAGATTGAAGACGGACAAGATG  
 GTGGCGTCACACCATAACAGTAACGAAAGTGGTTTGGTCAATGCAGATCTTGACGTTAAAGAT  
 GAGCTAATGTTTTACCTCTGGTTGATTTCGGGTTCAAATGACGCTATGGCTGGAGGATTTAC  
 AGCGTACGGTGGTGTGATTATGGTGAAGCCACGTCTCCATTTGGTGTCTATGGTGAAGCAC  
 CTACATCTCCCGGATTTGGAGTCTCCTCACCAGGCTTTTCTCCAACCTCCCAACATACTCT  
 CCTACCTCTCCAGCGTACTCACCAACATCACCATCGTACTCACCAACATCACCATCGTACTC  
 GCCAACATCACCATCGTACTCACCTACATCACCATCGTATTACCAACGTCACCATCATATT  
 CGCCAACGTCACCATCATATTCGCCAACGTCGCCATCGTATTCTCCAACGTCACCATCGTAT  
 TCGCCAACGTCGCCTTCTACTCTCCACGTCGCCAAGCTACAGCCCTACGTCTCCTTCTTA  
 TTCTCCTACATCTCCATCATACTCTCCTACGTACCAAGTTACAGCCCAACGTCACCAAGTT  
 ACAGCCCAACGTCCTCCAGCCTATTCCCAACATCACCAAGTTATAGTCTTACATCGCCTTCA  
 TACTCTCCAACATCACCATCCTATTCCCAACATCACCTTCTTACTCTCCACCTCTCCAAA  
 CTATAGCCCTACTTACCTTCTTACTCCCAACATCTCCAGGCTACAGCCAGGATCTCCTG  
 CATATTCTCAAAGCAAGACGAACAAAAGCATAATGAAAATGAAAATTCCAGATGA

>YIR039C 0.81 Cold

ATGCAATTGATTTCCATCCTCTCTTTGTTGTCATCATTGATGTGTTTCAATTGACCGTTTTAGG  
 GTCTTCCGCAAGTTCCATATGTTAAGTTTCTGTTCAAAGTTGGCTGATATTATAAATATAT  
 GCACACAGGATGTTTCTACCGTCTTCAAAGAAATGAGGTTCTTAACACCACAGTGATAAAT  
 GGAATAGGAGTGTATGTTGTCAAGATGGAAATCGGAACGCCCTCCACAAACGTTGTACCTACA  
 GTTAGATACTGGCTCTTCAGATATGATTGTGAATAATGCTGACATTGCCTATTGCAAATCGA  
 TGTCTGACGGATCTGACTACGCTTCAACTGATAATTACGAGCTCACAGCAACGTTCAATGGG  
 CTTCTTTCGACTACCATCTCATCAGAAGCTTATAACACTCTCTGCTCTTATTGGGGTACATT  
 CGATGCAAGCAACTCATCTACTTTTGAAGAATAATGCGACGTTTTTCAATAACACATACGGAG  
 ATGGTACGTATTATGCAGGGACTTATGGTACGGATGTTGTCTCTTTTCGAAAATATTACTCTA  
 AATGATTTCACTTTTGGTGTATCAAATGATACAATAGGCAATCCAAGTGGCATTTTAGGCAT  
 ATCGCTTCCCATTGCAGAATTTACAGATGGTATCGAATACGCATTGGCATTGAACAGAACAC  
 CTTTCATATATGATAACTTTCCAATGGAATTAATAAATCAGGGAAAGATTAATAAATAAGCG  
 TATTCTTTATTTTGAATGGACCTGATGCACACTTCGGGAGCATCTTGTGTTGGTGCAGTGG  
 CAAAAGTAAGTACACAGGACAGCTTTACACCCGCTATGCTGCAGGCATTCATAACCCCTG  
 GCTCAAATCCTGGGATGATTATTACTGCACAAAGTGTGGCAATTTTGGATAGTGAATCTGGC  
 AATAAACTGTTTCGGATATTCAATTTCCAGTGTGTTGGATTCTGGCACAACCTTTCTCCTA  
 TTTACCCACCGAAATTGCAGAAGCAATCGGCAAAGTTTTGACGGAGAGTACAGCTCTGACG  
 ACCAAGGCTACATCTTTGATTGTTCAAAGTGAACGATACTTTACTGTCCGTCGACTTTGGA  
 GGATTTAATATATCGGCAAACATATCCAATTTGTAACATCAGCTAAGGATCGTTGCGTTTT  
 AAATGTTAAGCAATCCGAGTCCACTTATATGCTGGGAGATGCTTTCTTGTGACGCATATG

TAGTCTACGATTTAGAAAACACTACGAAATTTCTATTGCTCAGGCTAGCTTTAATAATCAAGAA  
 GAAGATATTGAGGTTATCTCCGATACTGTCCAGGTGCCACCCCTGCTCCCGGATACTTTAG  
 TACATGGGTATATAAGCCCGGTAGTCCCATCGGAACAGGAGATTTTATTAATGTCAGCTGGA  
 CCTCGTATTCCGGAATTTTACAGTACAAATCATTGCTTGCCACCGCAGCCCAAAGCGATGAT  
 GCTAGTTCTTTCTCAAGTAGTGGCGGCTCTAGCGAAAGCACCCTAAAAACAAAATGCAGG  
 TTACAAATACCGTTCTTCTTTCTCCTTTTCATTATTGTCCTTCATATCTTATTTTCTTTTAT  
 AA

>YDR467C 0.65 Cold

ATGATTTATATGTTGGTTTTTCTGGATCGTCAACAACTCGTGATATTTTTTTGTTTCGAAG  
 TAGAGGAACCACAAATATTATTAAAGCGTGTATTTTTTTTTCTTACTCTTCTGTAAACTTC  
 TAAATGCTGCTGAGGCACCCCTACTAGCAATTTCCCTATCAAAGTTTGTGGCTGTTATTA  
 AGGGTATGTAAGACCTCGTATCTGCTGCTACTGATCACCATGTTAGAAGGAGCAGAATACTT  
 TTCTCTCGTAGTTGGGAATTCATTTGCGGAAGTGGAGGTGAAGGTGTTGGCTGTGATATC  
 CTGTTGTTTTGATTTGA

>YER070W 0.82 Cold

ATGTACGTTTATAAAAAGAGACGGTTCGTAAGAACCTGTCCAATTCGATAAGATTACCGCTCG  
 TATATCACGCTTATGCTATGGTTTAGATCCAAAACATATCGACGCCGTTAAGGTCACCCAAC  
 GTATCATTCTGGTGTCTATGAAGGTGTACAACAATCGAACTAGACAACCTAGCCGCTGAA  
 ACATGCGCTTATATGACTACTGTTTCATCCAGATTACGCCACCCTAGCGGCCAGAATTGCCAT  
 TTCTAATTTACATAAAACAAACCACAAAACAATTTTTCTAAGGTTGTGCAAGATCTTTATAGAT  
 ACGTCAATGCTGCTACTGGTAAGCCCGCTCCCATGATCTCTGATGATGTCTACAATATTGTC  
 ATGGAAAACAAGGATAAATTGAACTCCGCAATTTGTCTATGACAGAGATTTTCAGTACAGTTA  
 TTTTGGTTTTTAAAACTTTGGAACGTTCTTATTTACTAAGAATCAACGGTCAAGTGGCCGAAC  
 GTCCACAACATTTAATTATGAGAGTGCCTAGGCATCCACGGTAGAGATATCGAGGCTGCT  
 TTAGAAACGTATAACTTGATGTCTCTAAAATATTTTACTCACGCCTCTCCAACGTTGTTCAA  
 TGCCGGTACTCCAAAACCTCAAATGTCTCTTGTCTTGGTTGCCATGAAGGAGGACTCTA  
 TCGAGGGGATTTACGACACCTTGAAGGAATGTGCTTTGATTTCCAAAACCTGCTGGTGGTATT  
 GGTCTACATATCCATAACATTCGTTCAACTGGTTCTTACATTGCTGGTACAAACGGTACTTC  
 TAACGGTTTAAATTCCTATGATTCGTGTTTTCAATAACACTGCCCGTTATGTTGACCAGGGTG  
 GTAATAAAAGACCTGGTGCCTTTGCCCTTTACCTGGAACCATGGCATGCTGATATATTTGAT  
 TTTATTGATATTAGGAAGAACCACGGTAAAGAGGAAATTCGTGCAAGAGATTTGTTCCCTGC  
 TCTATGGATTCTGATCTTTTCATGAAGCGTGTGCAAGAAAATGGGACCTGGACATTATCT  
 CTCCAACATCAGCTCCTGGTTTAAAGCGATTGTTACGGTGACGAGTTTGAGGCTCTATATACC  
 CGCTACGAGAAAAGAAGGTTCGTGGTAAGACTATCAAAGCCCAAAAATTTATGGTATTCCATTTT  
 GGAAGCTCAAACCTGAACTGGTACACCTTTCTGTTGTTTACAAGGATGCTTGTAAACAGAAAAT  
 CTAATCAAAAAAATTTAGGTGTCATCAAGTCATCAAACCTTATGCTGTGAAATTTGTTGAATAC  
 TCAGCTCCAGATGAACTGCTGTTTGTAACTTGGCTTCCGTTGCCTTACCAGCATTCAATTGA  
 AACTTCTGAGGATGGTAAGACTTCCACATACAACTTCAAAAAATTTACATGAAATTTGCTAAAG  
 TTGTTACTCGTAATTTAAACAGAGTCATTGATCGTAATTACTACCCTGTTGAAGAAGCGAGA  
 AAATCCAATATGAGACATAGACCAATTGCTTTGGGTGTTCAAGGTCTCGCTGACACTTTCAT  
 GCTGTTACGTTTGCATTTGATTCGTGAGGAAGCCCGTTTGTCAAATATCCAAATCTTTGAAA  
 CTATTTATCATGCCTCCATGGAAGCTTCTTGTGAACTAGCTCAGAAGGACGGTCCATACGAA  
 ACTTTCCAAGGATCTCCTGCTTCTCAAGGTATACTACAGTTTGTATATGTGGGACCAAAAACC  
 CTACGGCATGTGGGATTGGGACACCTTAAAGAAAAGATATCATGAAGCATGGTGTAGAAAT  
 CCTTGACCATGGCACCAATGCCTACTGCATCCACATCCCAAATATTGGGTTATAATGAATGT  
 TTCGAACCAGTCACTTCCAATATGTACTCCCGTCTGTCTTATCCGGTGAATTCAGGTTGT  
 GAACCCTTACTTACTGCGTGACTTGGTTGATTTAGGTATTTGGGATGAGGGTATGAAACAGT  
 ATCTGATTACACAAAATGGCTCCATTCAGGCTTACCAAACGTTCCACAAGAATTTGAAGGAC  
 TTATACAAGACTGTTTGGGAAATTTACAAAAGACTATCATTAACATGGCAGCCGATCGTTC  
 TGTCTATATTGATCAATCTCATTTTGAATTTGTTCTTACGTGCCCAACTATGGGTAAAC  
 TAACAAGTATGCATTTTTTACGGATGGAAGAAGGGATTGAAGACCGGTATGTACTATTTGAGA  
 ACCCAAGCTGCATCTGCTGCAATTCAAATTTACTATTGATCAGAAGATTGCGGATCAAGCTAC  
 AGAAAACGTTGCTGATATTTCCAACCTGAAGCGTCCATCATATATGCCTTCCAGTGCAAGCT  
 ACGCTGCCAGCGATTTCTGTCGCCGAGCTGTGACTGCAAACGCAACTATTCATCTCTAGAT  
 AGCTCCTCGGAAGCTTCAAGAGAGGCATCTCCAGCTCCAACAGGTAGCCACTCATTAACATA

AGGAATGGCAGAATTAAACGTTCAAGAGTCTAAGGTAGAAGTTCCTGAAGTACCTGCCCCAA  
 CTAAGAATGAAGAAAAAGCTGCCCCCATCGTTGATGATGAGGAAACCGAGTTCGCATTTAC  
 AACTCTAAGGTTATAGCATGTGCTATTGATAACCCAGAAGCTTGTGAAATGTGTTCCGGTTA  
 A

>YDR529C 0.75 Cold

ATGCCACAGTCTTTTACGTCTATTGCGAGAATTGGTGACTATATTTTGAAGTCACCCGTCCT  
 CTCCAAGTTATGTGTTCCAGTTGCCAATCAGTTCATTAACCTCGCAGGTTACAAGAAGTTAG  
 GGCTCAAATTTGACGACTTAATTGCAGAGGAAAATCCCATCATGCAGACCGCTTTAAGAAGA  
 CTCCCTGAAGATGAATCTTATGCCAGAGCATATAGAATAATCAGGGCTCATCAAACCGAGTT  
 GACTCATATTTACTGCCAAGAAACGAATGGATCAAAGCCCAAGAGGATGTTCTTACCTGT  
 TGCCATACATATTAGAAGCTGAAGCTGCAGCTAAGGAGAAGGACGAGTTAGACAACATAGAG  
 GTCTCCAAATGA

>YCL004W 0.75 Cold

ATGACGACTCGTTTTGCTCCAACCTCACTCGTCCCTCATTACAGATTATTATCCCTACCTCTCCA  
 GAAACCCTTCAATATAAAAAGGCAGATGTCCGCTGCGAACCCCTTCTCCATTTGGCAATTATT  
 TGAACACGATCACTAAGTCCCTACAACAGAAATTTACAAACATGCTTTTCATTTCCAAGCAAAA  
 GAAATCGATATAATCGAATCTCCATCTCAGTTTTACGATCTCTTGAAGACAAAAATACTTAA  
 TTCACAAAATAGAATATTCATTGCGTCTCTGTATTTAGGCAAAAAGCGAGACTGAGTTGGTGG  
 ACTGCATATCCCAGGCATTGACCAAGAACCCCAAGTTGAAAAGTTTCTTTTCTACTTGGATGGC  
 CTTTCGAGGAACAAGAGAATTGCCTTCCGCTGTTCCGCCACTTTTATTATCGTCTTTAGTAGC  
 CAAATATGGGTGAGAGAGAGTGGATTGCCGATTGTACAAGACGCCTGCTTATCATGGTTGGA  
 AAAAAGTCTTGGTTCCCAAGAGATTTAATGAAGGTTTAGGCTTACAACATATGAAAATATAT  
 GGGTTTGATAACGAGGTCATTTCTTTCGGGAGCCAACCTTTCGAACGACTATTTCCACCAACAG  
 ACAAGATAGATACTATCTCTTTAAATCTCGAAACTTCTCCAACCTATTATTTTAAATTACATC  
 AACTCATAAGTTCCTTCAGTTATCAGATTATAAAGCCAATGGTGGATGGTAGCATCAACATC  
 ATTTGGCCAGATTCGAATCCTACTGTTGAACCGACGAAAAATAAAAGGCTGTTTTTAAAGGGA  
 AGCATCTCAATTACTAGATGGCTTTTTTAAAGAGTTCATAACAAAGCCTCCCGATTACTGCCG  
 TGGGTCAATTCTCCACATTAGTTTACCCAATTTCTCAATTCACTCCACTTTTTTCCCAAATAT  
 AATGACAAATCGACCGAAAAAAGAACAATATTGTCATTGCTTTCCACTATAACAAGCAATGC  
 CATTTCTTGGACGTTCACTGCAGGATACTTCAATATTTTGCCAGACATCAAAGCAAAACTGC  
 TGGCAACGCCGGTTGCTGAGGCAAATGTAATAACAGCTTCCCCCTTTGCAAACGGCTTTTAC  
 CAATCAAAGGGCGTCTCATCAAATTTACCTGGTGCTTACTTGTACCTGTCAAAAAAATTTCT  
 ACAAGATGTATGTAGGTACAGACAAGATCATGCTATTACATTAAGAGAATGGCAAAGAGGCG  
 TAGTAAATAAGCCGAATGGTTGGTCATATCACGCAAAAAGGTATTTGGCTTTCGGCTCGTGAT  
 AAAAATGATGCTAACAATTGGAAACCCTTTATCACGGTTATAGGATCTTCAAACCTATACGAG  
 AAGGGCGTATTCATTAGATTTGGAATCGAATGCTCTCATTATTACAAGAGATGAAGAGCTAA  
 GAAAAAAAATGAAAGCAGAGTTAGATAATTTATTACAATATACAAAACCTGTAACCTCTAGAA  
 GACTTTCATCAGACCCAGAAAGACATGTTGGCACTGGTGTAAGATAGCTACCTCCATTTT  
 GGGTAAAAAACTTTAG

>YNR061C 0.77 Cold

ATGTTAAAGTTAACAACAACATCCGTTACTTTCCACGTACTAAGATATTTCCAACCTGGCTT  
 ATCTGTAACCTAAGTTGTTAGCTAGTTTTGCCATAATCACAACCTATAAAGTGGATCGAA  
 TCCTTAGATTGAGCTTAGCTGTTCAATCATATCTTCAGTTTATTTTGGGATTGTGAGATTT  
 TTGCCGTGTTCTGTTAATATTCGTGATGGAAATGTTTCAGACCGTCCTGTGGTTTACCGCTTT  
 CGTAACTCTAGCTTCAAAATTTGGTTCTATGTCCTGCTCAAGTATGCCACGGGGTATAAACT  
 TTGATTATTCAGGTTCTTGTAAGATTGCTAAAATAGATATTTTACCAGAAGCCGTTTTATTTC  
 ATACTATTTCTCGCTACCACATATGCTTCTTATATCACAGTCCATCTCAAGCTAAGGAAAA  
 TGGGTCAAGCACAAGATCTGTTTTGAAGGCTTGTGTGAAGGCATTACGTGATACCGTGGACC  
 GCTTGGAGACCAGTCTGGAAGAGAGTGAGCCTCTTTTAGATCTTGAAGTTCAGGAAGATGCC  
 AGGACTGAAACCGAAAGCATTGAGGATTCAACTGATAGTGAGGATAATGCTAACATCGAACA  
 AGAGAAAGTGATTGATGGTTCAATTGAGCATTCCTTCATGA

>YOR102W 0.82 Cold



ATGCAAGCACGCCGGCAAACCCCTTCCTCAATTTATAAAAATGTAAACAAACGAAATGTAAAAT  
 CAAACTAGCAACAATAAACTCGGCAAAAGCTCTGTTTTTAGAAATGCCTGGAAAACCTATTAC  
 ACAATTGTAACCGCAAACCTCATCAATAGGACGAATTGTCCACACAAATAATGAATCCCGCT  
 AAAAACGCATTGAATGGAAAATATCACGGATCAAGATAATGAATGTACACTGGATCACCCC  
 TAATAATACCAAAAAGAAGCAGAATGTATCAATTAGTTTTAGTTTTCAGTTTGGATATTTTTCAATTT  
 GGGCAAAATATGCCCTCTTAGAAGTCTTGAAAGTTTCTTGA

>YMR318C 0.8 Cold

ATGTCCTTATCCTGAGAAATTTGAAGGTATCGCTATTCAATCACACGAAGATTGGAAAAACCC  
 AAAGAAGACAAAGTATGACCCAAAACCATTTTACGATCATGACATTGACATTAAGATCGAAG  
 CATGTGGTGTCTGCGGTAGTGATATTCATTGTGCAGCTGGTCATTGGGGCAATATGAAGATG  
 CCGCTAGTCGTTGGTCATGAAATCGTTGGTAAAGTTGTCAAGCTAGGGCCCAAGTCAAACAG  
 TGGGTTGAAAGTCGGTCAACGTGTTGGTGTAGGTGCTCAAGTCTTTTCATGCTTGGAAATGTG  
 ACCGTTGTAAGAATGATAATGAACCATACTGCACCAAGTTTGTACCACATACAGTCAGCCT  
 TATGAAGACGGCTATGTGTGCGCAGGGTGGCTATGCAAACCTACGTCAGAGTTCATGAACATTT  
 TGTGGTGCCTATCCCAGAGAATATTCATCACATTTGGCTGCTCCACTATTATGTGGTGGTT  
 TGACTGTGTAATCTCCATTGGTTCGTAACGGTTGCGGTCCAGGTAAAAAAGTTGGTATAGTT  
 GGTCTTGGTGGTATCGGCAGTATGGGTACATTTGATTTCCAAAGCCATGGGGGCAGAGACGTA  
 TGTATTTCTCGTTCTTCGAGAAAAAGAGAAGATGCAATGAAGATGGGCGCCGATCACTACA  
 TTGCTACATTAGAAGAAGGTGATTGGGGTGAAAAGTACTTTGACACCTTCGACCTGATTGTA  
 GTCTGTGCTTCCCTCCCTTACCAGCATTGACTTCAACATTATGCCAAAGGCTATGAAGGTTGG  
 TGGTAGAATTGTCTCAATCTCTATACCAGAACAACACGAAATGTTATCGCTAAAGCCATATG  
 GCTTAAAGGCTGTCTCCATTTCTTACAGTGCTTTAGGTTCCATCAAAGAATTGAACCAACTC  
 TTGAAATTAGTCTCTGAAAAAGATATCAAAAATTTGGGTGGAAACATTACCTGTTGGTGAAGC  
 CGGCGTCCATGAAGCCTTCGAAAGGATGGAAAAGGGTGACGTTAGATATAGATTTACCTTAG  
 TCGGCTACGACAAAAGAATTTTCAGACTAG

>YLR421C 0.79 Cold

ATGAGTATGAGTTCAACTGTAATTAATTCAGGGCTGGTGTGTTGTGAATACAACGAAGATTC  
 ACGTCTATGTACGCCAATTCAGTTCAGGGTGAATCGAGATCAAACCAAATGAAGAGGAAG  
 AATTGGGATTTTGGGATTTTCGAGTGGCGTCCAACGGAAAAGCCGGTCCGGAGGGAACTTGAT  
 CCTATTTCTTTGATTTTAATTCCTGGAGAGACCATGTGGGTTCCTAATAAAATCCAGTAAAAG  
 TGGCAGAATATTTGCTTTAGTTTTTTTTCATCCAACGAAAGGTACTTCTTTTGGCTGCAAGAGA  
 AGAACTCAGGTAATTTGCCCTTAAATGAATTGAGTGCGAAAGATAAAGAAATTTACAATAAG  
 ATGATTGGAGTGCTGAATAATAGTAGTGAAAGTGATGAGGAAGAAAGCAATGACGAAAAGCA  
 AAAAGCTCAAGATGTGGATGTTAGTATGCAAGATTAA

>YAR008W 0.71 Cold

ATGCCACCCTAGTATTTGACATAGATCACATCAAACCTTCTAAGGAAATGGGGTATTTGTGG  
 TGTGTTATCTGGAACCTTTGCCCTACTGCAGCACAGCAAAAATGTATTTTTGTGCGGTACCTTTGA  
 GGCTTATGTTAGAAGATGTGCTGTGGCTGCATTTGAACAATCTTGCCGATGTGAAATTAATA  
 AGACAAGAGGGGAGATGAGATTATGGAGGGAATAACATTAGAGCGGGGCGCCAAACTATCTAA  
 AATTGTCAACGATCGTTTGAACAAGTCATTTGAATATCAGAGAAAGTTCAAAAAGGATGAAC  
 ACATTGCAAAAATTAAGAAAAATCGGTAGAATCAATGATAAAACCACAGCTGAAGAATTGCAA  
 CGGCTTGATAAAATCTAGCAATAATGACCAGCTAATTGAATCTTCTTTGTTTATTGACATTGC  
 TAATACCTCTATGATTTTAAGAGACATACGGAGTGATTTCAGACAGCTTATCCCGCGATGATA  
 TCAGTGATTTGTTATTTAAGCAGTACAGACAGGCAGGAAAAATGCAGACCTATTTCTTATAC  
 AAGGCATTGAGAGATCAAGGGTACGTTTTGTCCCAGGTGGACGTTTTGGTGGGAAGTTTAT  
 AGCATAACCCTGGTGATCCTCTTCGTTTTCCATTCACATCTGACGATACAAGATGCGATTGATT  
 ATCATAATGAGCCGATTGACCTAATATCCATGATAAGTGGTGAAGACTAGGAACGACTGTG  
 AAAAACTTTGGGTCATAGGCGGTGTTGCGGAAGAGACAAAGGAAACTCATTCTTCTCAAT  
 AGAATGGGCTGGATTTGGTTAA

>YHR110W 0.82 Cold

ATGAAATATAATATAGTGCATGGAATTTGCCCTATTATTTGCTATTACCCAAGCTGTAGGGGC  
 TGTCCATTTTTATGCGAAGTCCGGGGAAACCAAATGCTTCTATGAACACTTATCCCGGGGAA  
 ACCTACTGATTGGGGATTTAGACCTATATGTAGAAAAGGATGGTCTGTTTGAAGAGGACCT

GAATCCAGTCTGACAATAACTGTCGATGAAACATTCGATAACGACCATCGTGTCTTAAATCA  
 AAAAACTCACACACAGGTGATGTTACTTTTACAGCTTTAGACACAGGTGAACATAGATTTT  
 GCTTCACTCCATTTCTACAGCAAGAAATCAGCCACACTAAGAGTATTCATCGAACTAGAAATT  
 GGCAATGTTGAAGCGCTTGACAGCAAGAAAAAGAAGATATGAATTCACTTAAAGGGGAGGGT  
 AGGCCAGTTGACTCAAAGGCTATCTTCTATTCGTAAGGAGCAAGACGCTATCAGAGAAAAAG  
 AGGCAGAATTCAGAAATCAAAGTGAATCAGCTAACAGCAAGATAATGACGTGGTCTGTGTTT  
 CAACTTCTCATATGCTGGGCACCTGTGCCTTCCAGCTACGCTATCTCAAGAATTTCTTTGT  
 CAAACAGAAGGTAGTATAA

>YDL224C 0.8 Cold

ATGTCATTAGTGCATAATCAGACGAATTTAAACGAATCCAAATTTCTTATAGAAAGGGCATT  
 TAGTTCTAGTTCAGAAACCGTTCATTATCAAAGGAGGCAACATATCCCATGCCAACTGCAT  
 ATAGTTTTTCCGCAGTTAGGAGCAACAGCGAGACTAACATTTAAAGAGAGAACCCGCAAGGT  
 TTTGCAAAAGAACCATTATGACTTCTATGCTTCATAATTTGACCATGTCCACGGGGAAAGG  
 GAACGGGAATGACGTCAATTTCTTAGCCCCACATGATGTGGATGTTGGCCCTACTGTCCTT  
 TGCTGAGGAATTTGCCAAAAGACATTACACTAAGAGAGTGTATTGTATATTTTCACTAGCA  
 ACTGGGGTGTCAAGTATAGAACTAAAAAGGGATGATAGAGAACCCTTTAATGACAATGAAAA  
 AGTCGTTGTGGTCAAATTTGGATCCCTTTCTTTAGTAACCCATTATGCTAATATATTAACCT  
 CGAAGTCTGAGATTTTTGGGCCTAGTTTTCCCTTTAGGTCTCACATTGACGTAGTAAATGAA  
 CAAACGCAGCTTCCAGTGAGTTTTCAAGAACATGTTTCATCTGGCACTACAAATAGTTCTCC  
 AAAGAATTACCAATTTGTCGTCCAGTGCAGCAAAATGAAATTCAAAATCAAAGTTTTAATACTA  
 TATCATATGGAAAACTAGTTCCTCTCCATTAGGGCCTTCAGCGGCCAAGCCAAGGCCTTCA  
 TTACTTTTCAAGAGATCCCTCCGTTTTCTCATTTCAATGACCCATTCGGATTGGAAACAATCTC  
 TCAAAGAAAAGAAATCCGTACCCCTTTCTACGAAATAGCATCTCACAACATGATTTATCAAACG  
 TAACCACCACACCAGTTCAGCAGGAATGCCACCTCAGAAGGACGCTGGCAAGTCACTTTTG  
 CTACTAGAAAAGGATGAAATAAATGAAAGTATTTGGAATGGTATGAATTAGTTAATGATGT  
 TGGTAATTTCTCATTTGGTGCATCTTTACAAGAGCCTCCGATGTCATCTACGCCTGTGATGG  
 AGTGGAAATGCTTCCCTCAACTGCTAATATTTCTCTTTTTTCAATTATCTAGCCAAGAAAATCAT  
 CAGTCTAATCTGTTGCCTCCATCCACCATTCAATTAGCCAGGATGTTCCACATATTCAATC  
 ACAACCTAATCTGAACAATTCAGGAGTAATACATTTCCGCGACTTCTCTACCGCATTATCACT  
 TATTGAACCAAATTAATGCTTCAACTAAGACACAAAGTATTCAGCAGAGCGTTTTCGAATGTT  
 CCTTCCAATTTGGACCTGAATCTCCAAACGGAAAATGGCCACCACAAATCTTCTGCTCCTAA  
 CGGGTCTTCAATATTCACAACCAAAGGTGAATCAAGGCTTTTTTAGTGAGTGAACAAGACA  
 CCAGTACAATATCACGACAGAAAGAATGTTCTTCTACAGCTTCTGCCTCTGCATTTTCGAAA  
 AATAACGAAACAAATGTGGCAGTTCCACAACATTTTCACAGGCTGACCTATCACTACTAGC  
 CAAGGTGCCACCACCAGCCAATCCCGCGGACCAAATCCTCCTTGTAATACTCTTTATGTGG  
 GTAATCTACCTCCGATGCCACGGAACAAGAATTAAGGCAATTGTTTTCTAATCAGCAAGGT  
 TTTCTGATAGTATCCTTTCAGGAATAAAATGAACTCTCACGGTTCATGGCAACGGTTCATGGCCA  
 TGGTCCAATTTGTTTTGTAGAAATTTGAGGATGTTAGCTTTGCCACTAGAGCATTGGCAGAAT  
 TATATGGTAGTCAACTACCTCACCCCGCCCTTCCCTCAACAACAAGGAGGTATCAGGTTG  
 AGCTTCTTAAAAATCCATTAGGCGTTAGAGGCTCAAACAGTAGGAGTAAATCTGGTTACAG  
 CTTAATGGAAGTTACGGGAAATCATGA

>YPL141C 0.74 Cold

ATGTCGTACACCAATAAACGTCATACATACTACGGAGGGTTTACCAACGATTTGTCTGACAC  
 ATTTCAAGTACCCTCAAAGAACAGATGAGCAAAGCGGAAACATGTAACGTTTGGTCCCTATA  
 TCCTAGGGTTCGACGTTAGGAGAAGGAGAGTTCGGAAAAGTGAAGCTAGGCTGGCCAAAGAAT  
 TTTTCAAACAGCTCTAATTTCACTTTTACTTCCCAAAAACAAGTAGCAATTTAACTTATCAA  
 ACGTGATAGCATATCGAATGATTACAGGAAAGAAGTTAAAAATATACAGAGAAATCAACGCCT  
 TAAAACACTTATCACATCCGAATATCGTAAAAATTAGAAGAAGTGTGCAAAATTTCTAGGTAC  
 ATTTGGTATTGTCTTAGAGTACGCATGCGGGGAGAAATTTATAAATATATTTCAAAAAAAAG  
 GAGGCTTAAGGAAATGAATGCATGCAGGTTATTTTCTCAGCTAATAAGTGGAGTACATTACA  
 TACATTTCTAAGGGACTTGTTCACAGAGATCTCAAATTTGGAAAATCTATTACTAGACAAGAAT  
 GAGAACCTAGTTATTACAGATTTTGGGTTTGTCAATGAGTTTTGCTCACGAAACGAATTAAT  
 GAAGACGTCATGTGGCTCTCCATGCTACGCAGCGCCTGAACTAGTGATAAGCGCCGAACCAT  
 ACGAAGCTAGAAAAGCAGATATATGGTCATGTGGAGTTATACTTTACGCTATACTAGCTGGA  
 TATTTACCGTGGGATGATGATCCAAATAATCTGAAGGCAGCGATATAGGAAGACTTTATAA

TTATATTAACCTCCACACCATTAAAGTTCCCTGATTATATTCCTTCTATACCTCGGGACTTAT  
 TAAGACGCATGCTGGTCTCAGACCCAAAGAAAAGAATAAACCTGAAACAGATCAAGAAACAT  
 GAATGGCTAAAGCCTCATTCTTCATTCTTATCCATAACACCTGATGAGTGGGACAAACTAAA  
 CAATACTCAATCCGTGTTTCAGATTAGCAAAAACCAAGAAGAAGATATGGATCTAGACCACAAT  
 CCAGTTGTTCTACCTCATCTCTTGGCTCAAGGAGTGATAAAAGGGATTCACTGGTCATTGAT  
 TCAACTTTAATTACTTTCCCGGCTCCGCCTCAAGAATCACAAAATCATATTATAACCAGACC  
 GGCTTCTATTGCATCTGACCAGCGGCTGTCACCTATAAGAAGATCTAATAGGCACAATAGAA  
 GTAACCTCTGCTGCATCCGTTGCCCTGCAGGCAGTGGTGAACGCAGATAGGGAATATGTGTTA  
 AGTCATGAACAATCATTATCCCCAGTACAAAACATTAGACAAACTACGGGAAACATGACTGC  
 CAGTCTTTCACCTCCACCAGCCATAAGTCCAGGCGATATTATAATCGAAACCACACCTATTA  
 AAAGAAATACAATTTCTGGGAGTAGTATTGTACCAAGTTTAGAAGAAGAGTCGTCTACCACA  
 ATGCAAACAAGCAAGATTCAACCAAATAACATGGCTTCATCACAAAATCATCAATACAATAA  
 AAATAAGACCCAAAATAGTCTCCAATCTGCTAAAAATTTCTACCGTACGTCTTCTCATCCC  
 ATACAAAGCCACGGCCAACCTTCATACCATCCTGGCTCATAACAAACACCTCCCTACAATTC  
 AATACGCTCTCCATATATGAGATCAACGAAAAAGCTAAAAAGTAGCGCTTCATCACAAACGCT  
 GAATCAAAGAGACACATCCCCATTTGATTCCACACCATAACCTTGCCCTAGATACATGCATAA  
 CCTCATCTCTTCCATCGAAAAGCTCTCCAAAGTTAATTACGCACGGCCAATTTTTCAGTAGCA  
 AAACCCTCTGTTGATTTGCAAAGCGTATCTGGTGACTTGATCAAGTATAAGAGGGACGCTGA  
 TGTAGTAACGAGAATCTATGATGAAAAATACAAACAGAAGCGCAAAGTTTGAGATATAGCG  
 GCATATTCAGTGACATCTCATGCGATACGGTCACCGAAGAGTCTGATGAATTGAGGCCACCA  
 GAATCTCTCTTCAACAACATGAAGGACAAGAATCAATTGATAAGGCGAAAACGGAGGACAC  
 AAGTGAAGGGTAGTAAAAAGTAGCAACATCGCGAAAGCTACAGCACAAAAACACGTCAATA  
 ACCATCTAGAAAAGATCACTTAACGAAGCAGAGTCAACAAAAGAAAAGATTTAGCTTTCTTTCC  
 TTGTACTCTTATGATACTTCCAAATCTAGTTTATACTCATCAATGGATTCCAAACGGAAACC  
 TTCTCCACCTTCCCAAAGACGCCAAAAAAGGATGACAGTTATCAAAACAAATTCAAAAGATC  
 ATTATATCACTGCTTCAAAATATGCAAACATCCCATCAAGTCTCAAAAAGACCTGCCTGCACCA  
 ACGATGGTGCAAATAAATGTACTTTAGAAAACAAAAAAGCGGTCCGAAGCAACAGGTCCTC  
 CATAATGGTATCTGAGGTCAACAAGGCAAGCGTAGACAATAAAGCAGCCCAAAGTCCAGAAC  
 ATTC AACCGCAAAGAGTATTAGGGTTTTTCAAAGAAGAAGTATGAAAATCTAG

>YGR292W 0.76 Cold

ATGACTATTTCTGATCATCCAGAAACAGAACC AAAGTGGTGAAAGAGGCCACAATCTATCA  
 AATTTACCCAGCAAGTTTTAAAGACTCCAATAACGATGGCTGGGGTGATTTAAAAGGTATCA  
 CTTCCAAGTTGCAGTATATTAAGATCTTGGCGTTGATGCTATTTGGGTTTGTCCGTTTTAT  
 GACTCTCCTCAACAAGATATGGGGTATGATATATCCAACCTACGAAAAGGTCTGGCCACATA  
 TGGTACCAATGAGGACTGTTTTGAGCTAATTGACAAGACTCATAAGCTGGGTATGAAATTC  
 TCACCGATTTGGTTATCAACCACCTGTTCTACAGAACACGAATGGTTCAAAGAGAGCAGATCC  
 TCGAAGACCAATCCGAAGCGTGACTGGTTCTTCTGGAGACCTCCTAAGGGTTATGACGCCGA  
 AGGCAAGCCAATTCCTCCAAACAATTGGAAATCTTTCTTTGGTGGTTTCAGCTTGGACTTTTG  
 ATGAAACTACAAATGAATTTTACCTCCGTTTGTGCGAGTCGTCAAGTTGACTTGAATTGG  
 GAGAATGAAGACTGCAGAAGGGCAATCTTTGAAAGTGCTGTTGGATTTTGGCTGGACCATGG  
 TGTAGATGGTTTTAGAATCGATACCGCTGGTTTGTATTGAAACGTCCTGGTTTACCAGATT  
 CCCC AATTTTTGACAAAACCTCGAAATTACAACATCCAAATGGGGGTCTACAATGGTCCT  
 AGGATTCATGAATATCATCAAGAACTACACAGATTTATGAAAAACAGGGTGAAGATGGTAG  
 AGAAATAATGACAGTCGGTGAAGTTGCCCATGGAAGTGATAATGCTTTATACACCAGTGCAG  
 CTAGATACGAAGTCAGCGAAGTTTTCTCCTTCACGCACGTTGAAGTTGGTACCTCGCCATTT  
 TTCCGTTATAACATAGTGCCCTTCACCTTGAAACAATGGAAAGAAGCCATTGCATCGAACTT  
 TTTGTTTATTACGGTACTGATAGTTGGGCTACCACCTACATCGAGAATCACGATCAAGCCC  
 GGTCAATTACGAGATTTGCTGACGATTCCGCCAAAGTACCGTAAAATATCTGGTAAGCTGTTA  
 ACATTGCTAGAATGTTTATTGACAGGTACGTTGTATGTCTATCAAGGTCAGGAGATAGGCCA  
 GATCAATTTCAAGGAATGGCCTATTGAAAAGTATGAGGACGTTGATGTGAAAAACAACACTACG  
 AGATTATCAAAAAAAGTTTTGGTAAAAACTCGAAGGAAATGAAGGATTTTTTTAAAGGAATC  
 GCCCTACTTTCTAGAGATCATTCGAGAACTCCCATGCCATGGACGAAAGATAAGCCCAATGC  
 TGGATTTACTGGCCAGATGTTAAACCTTGGTTTCTCTTGAATGAATCTTTCGAGCAAGGAA  
 TCAATGTTGAGCAGGAATCCAGAGATGATGACTCAGTTCTCAATTTTTGGAAAAGGGCCTTG  
 CAAGCCAGAAAAGAAATATAAGGAACCTTATGATTTATGGTTACGATTTCCAATTCATTGATTT  
 AGACAGTGACCAGATCTTTAGCTTCACTAAAGAGTACGAAGACAAGACGCTGTTTGTCTGCTT

TAAATTTTCAGTGGCGAAGAAATGAATTCAGCCTCCCAAGAGAAGGTGCTTCTTTATCTTTT  
 ATTCTTGAAATTATGATGATACTGACGTTTCTCCAGAGTTTTGAAACCATGGGAAGGTAG  
 AATCTACCTCGTCAAATAA

>YKL022C 0.79 Cold

ATGAAGTTTTGTCTTTATTGCTGTCATTGTTATATCGTTATTTGTGGAAAGGCTACACATTA  
 TTACAAGTCATCAAAAAGCCACATCAAACCTGAAATCGTCAAACAGGGTACTTATGAGAAACC  
 CCATGTCGCCTTCGGAGCAACATTCACAACATAATTCTACATTGGCCGCCCTGCCATTTGTT  
 TCTAACGTATCTGCAGCAAGAACACAACAGAGTTTACCAACCGATGCTCAGAATGATCGTTT  
 GCAGCAACCCTGGAACAGAACCAATACGGCTACGAGTCCCTACCAGTCGTTAGCAAATAGCC  
 CTTTAATACAGAAGTTGCAAGCGAATATTATGACTCCGCACCAGCCATCTGCTAATTCTAAT  
 TCTAATTCCAATTCATTACGGGCAATGTTGTGAACGACAATAATTTGTTAGCTTCTATGTC  
 TAAGAATAGTATGTTTCGGTTCTACCATACCGTCCACATTAAGGAAGGTGAGCTTACAGCGTG  
 AATATAAGGATTCAGTTGATGGTGTGGTTTCGTGATGAAGATAATGATGAGGATGTTTATAAC  
 AATGGCGATGCAGCTGCGAATGCTAATAATGATCGGGAGAGTAAACTAGGGCATAATGGGCC  
 ATTGACGACAACAACATTAACGACAACAACCTACAGCAACTCAACTAGATGTTTCTGAATTGT  
 CAGCTATAGAAAAGATTGAGACTTTGGAGGTTTCGACGCATTGATGCAGCATATGTATAGGACC  
 GCAGAATATATTGCTGATAAAAGTGTATAACATATCCAATGATCCTGATGATGCCTTCTGGCT  
 CGGCCAAGTATATTACAATAATAATCAGTACGTAAGGGCTGTAGAACTTATTACCAGGAACA  
 ACTTGGATGGCGTTAATATCCTGTGTCGATATCTGTTGGGACTCTCCTTTGTTAAATTACAG  
 AGATTTGATGACGCTCTAGATGTTATAGGCGAATACAATCCATTCAGCGAGGACCCATCTAC  
 GACGGCAGCAAAACCCATGAGCAATAATGGCAATAACAGCAATACGTCACAGCCAGTTACTG  
 ACGGCGGTATAAAAATGGAGTCATCATTATGTTTTCTGAGAGGGAAAATATATTTTGCACAA  
 AATAATTTTAAACAAGGCAAGGGATGCATTTTCGTGAAGCGATTTTGGTAGATATAAAAAATTT  
 TGAAGCTTTTCAAATGCTCCTGTCCAAGAACCCTGTTAACTCCACAAGAGGAATGGGACCTGT  
 TTGACTCTTTGGATTTCAAAGAATTTGGGGAAGATAAAGAGATTATGAAGAATCTTTATAAG  
 ATCAACCTATCTAAATACATCAACACGGAAGATATAACGAAGTCCAATGAGATTTTAGCGAA  
 AGATTATAAATTAGCTGACAATGTAGATGTCGTAAGAAGTAAGGTGGATATCTGCTATACGC  
 AATGCAAATTC AACGAATGCTTAGAGTTGTGCGAGACCGTTTTGGAAAACGACGAATTTAAT  
 ACGAATATCTTGCCAGCATAACATTTGGATGTCTATATGAACTATCAAATAAAAAATAAGCTTTT  
 CCTTCTGTGCGCATCGATTAGCGGAAACTTTCCCGAAGTCTGCGATAACATGGTTTTAGCGTTG  
 CGACCTATTATATGAGCTTGGACAGAATTAGTGAAGCACAGAAATACTATTCCAAATCCTCA  
 ATACTGGATCCAAGCTTTGCTGCCGCATGGCTGGGATTTGCACACACGTATGCCCTAGAAGG  
 TGAACAAGACCAAGCATTAAACAGCATACTCTACAGCCTCCAGATTCTTTCCTGGAATGCACT  
 TACCAAACCTGTTTCTCGGGATGCAGTTTATGGCGATGAATTCATTAAATTTAGCAGAATCG  
 TATTTTGTCTGTCATATGACATTTGTCCAACGATCCATTAGTACTCAATGAAATGGGTGT  
 AATGTATTTTAAAGAAGAACGAATTTGTCAAAGCCAAGAAATACCTGAAGAAGGCGTTGGAAG  
 TGGTGAAGATCTTGATCCAAGTTCAAGAACGACAATATCAATTC AATTAATCTAGGACAC  
 ACTTACAGAAAAGTTAAATGAGAACGAATTTGCCATTAAATGTTTTAGATGCGTTTTTGGAGAA  
 AAATGATAAAAACCTGAAATTCATTGTTCCCTTAGGTTACTTATATTTGAAGACGAAGAAAT  
 TACAAAAGGCCATTGATCATTGACACAAATCATTGTACCTAAAGCCTAATAATTCATCTGCA  
 ACAGCGCTTTTGAAAAATGCCCTAGAGCTAAACGTGACGTTATCATTGGATGCCAGCCACC  
 ACTTATTGACAAGTCGAATTTAATGAGTCAGGCAAGTAAGGACAAGGCTTCGCTCAATAAAA  
 AAAGATCTTCATTGACTTATGACCCTGTCAACATGGCTAAAAGGTTGAGAACACAAAAGGAG  
 ATCTTTGATCAGAATAACAAAGCTCTAAGAAAGGGAGGTCATGACAGCAAAACTGGAAGTAA  
 TAATGCCGACGATGATTTTACGCGAGATATGGAAGTGAATAA

>YBR001C 0.68 Cold

ATGGTAGATTTTTTACCAAAAAGTAACGGAAATAAATCCTCCATCCGAAGGTAATGATGGTGA  
 AGATAACATAAAGCCACTTTCAAGTGGTTCAGAGCAGCGCCGTTGAAAGAAGAGGGGCAAC  
 AAGGTGGTAGAAGACATCACCGGCGGTTGTCTCTATGCATGAGTATTTTGACCCGTTTTCC  
 AACGCAGAGGTCTATTATGGACCAATAACAGATCCAAGAAAACAGTCAAAAATTCATAGACT  
 AAATAGAACCAGAACTATGAGTGTTCATAAAGTTTCTGACTTCAAAAACGGAATGAAGG  
 ATTATACCCTGAAAAGGAGGGGTTCTGAAGACGACAGCTTCCTCAGCAGCCAAGGTAACCGT  
 AGATTTTATATTGATAATGTGGATCTCGCTTTAGATGAGCTGCTCGCTAGTGAGGACACAGA  
 CAAGAATCACCAATTAACATAGAAGACACTGGGCCCAAAGTTATTAAGTTCGGGACGGCCA  
 ATTCCAACGGTTCAAACATGTAATGTTAGGGGAACATATATGCTTTCTAACTTGTTCGAC

GAACTAACCATTGCAAAAAGTTTCGGACGACACCAAATATTTTTGGATGAGGCGCGTATAAA  
 TGAAAACCCTGTTGATAGATTATCAAGATTGATAACGACTCAATTTTGGACGAGTTTAAACGA  
 GAAGAGTTGATCTTTATAATATTGCAGAAATGCTAGAGACTCAAAAATAGATACGCCAGGC  
 GCTAAAAATCCAAGAATTTATGTTCCATATAACTGCCAGAGCAGTACGAATTTTACATTC  
 GGCATCTCAAATGAACCCGTCTTAAAACTTGAAGTGGAGTACTTACCAAAGATATTACAG  
 CAGAGTATGTTAAATCATTAAATGATACACCGGGTTTGTAGCCCTGGCTATGGAAGAACAC  
 GTTAATCCATCTACTGGTGAAAGGTCCCTAGTTGGTTATCCTTATGCGGTACCTGGCGGTAG  
 ATTCAATGAATTGTATGGCTGGGATTCATATTTAATGGCAC TGGGACTCATAGAAAGTAATA  
 AGGTTGATGTTGCAAGAGGTATGGTGGAGCATTTTATATTCGAAATTGATCACTATAGTAAA  
 ATTTTGAATGCTAATAGGAGTTATTATCTTTGCAGATCTCAGCCACCATTCTAACCGATAT  
 GGCTCTGCTCGTATTTGAAAAGATAGGAGGTAAAGAATAATCCAAACGCTATTCAGTTGTAA  
 AACGCGCGTTTCAGAGCTGCTATTAAGAATAATAAGAGGTGTGGATGTCGAGCCCTAGGTTA  
 GATTCCTCTGACAGGGCTGTCTTGTATCATTCTGATGGTATGGTATCCCTCCGAAAAC TGA  
 ACCAGATCATTTTGATACTATATTATTACCGTATGCTGAAAAGTACAATGTTACTCTGGAAA  
 AGCTTAGGTACCTTTATAACGAAGGCATGATTAAGAACC CAAACTGGATGCATTTTTTTTA  
 CATGATCGTGCCGTGAGAGAGTCAGGACATGACACGACTTATAGTTTTGAAGGTGTATGTGC  
 ATATTTAGCGACAATTGATCTAAACTCCTTGCTCTATAAAATATGAGAAAAGATATTGCTTTCG  
 TCATTAAGGAGTATTTTGGTAATGAATATAAAGATGAGAATGATGGAACGGTAACCGATTCT  
 GAACACTGGGAGGAGCTAGCTGAACTGAGGAAAACAAGGATTAATAAGTATATGTGGGACGA  
 AGATTCAGGGTTTTTCTTCTATTATAACACGAAACTGAAATGCAGAACGTCTTATGAGTCTG  
 CAACGACTTTTTTGGAGTTTTGTGGGCTGGTCTTGCAACTGAAGAGCAAGCAAAAATCACAGTA  
 GAAAAGCTCTTCCCTCAGTTAGAAATGCTCGGCGGACTAGTTGCATGCACAGAAAAATCAAG  
 AGGTCCTATTTCTATTGATAGACCGATCAGGCAATGGGATTATCCTTTTGGTTGGGCGCCGC  
 ACCAAATATTAGCCTGGAAAAGTTTTATCTGCATATGGTTATCAACAAGTAGCTACAAGATTG  
 GCTTATAGGTGGCTGTACATGATTACAAAATCATTTGTTGATTATAACGGAATGGTGGTAGA  
 AAAATATGATGTGACAAGAGGGACTGATCCGCATCGCGTTGATGCGGAATATGGTAATCAAG  
 GTGCTGATTTTAAGGGCGTCGCTACAGAAGGCTTTGGTTGGGTGAACACAAGTTATTTGCTC  
 GGATTGAAATATATGAATAATCATGCAAGAAGGGCTCTCGCTGCTTGTAGTCCACCATTGCC  
 ATTTTTCAATAGTTTGAACCCCTCTGAGAAAAAATTGTATTACCTATAA

>YPL004C 0.81 Cold

ATGCACAGAACTTACTCTTTAAGAAATCAAAGAGCTCCAACGGCTGCTGAGCTACAAGCTCC  
 TCCACCACCACCATCCTCAACGAAGTCCAAGTTCTTCGGAAAGGCCTCTATTGCGTCTAGTT  
 TTAGAAAAAATGCGGCTGGTAACTTTGGGCCAGAGTTGGCTCGTAAATTATCTCAATTGGTT  
 AAGACTGAAAAAGGTGTCTTAGAGCTATGGAAGTTGTTGCCAGCGAACGCCGTGAAGCTGC  
 AAAGCAACTGTCTCTATGGGGTGTGACAATGATGATGATGTTTTCCGACGTAACCGACAAAT  
 TAGGCGTCTTAATATATGAGTTGGGTGAACTACAGGACCAGTTCATCGATAAATATGATCAA  
 TACAGAGTACATTAATAATCAATTAGGAACATTTGAAGCCTCTGTTCAACCTTCGAGAGATCG  
 TAAGGAAAAGATCACAGATGAAATTGCCCATTTGAAATATAAAGATCCTCAATCAACAAAAA  
 TCCCAGTTTTTAGAGCAAGAAGTCTCGTGCCGAAGCTGAATCTTTGGTTGCGGAGGCTCAA  
 TTATCGAATATCACACGTGAAAAATTAAGGCTGCTTATAGTTATATGTTTGAATTCATTAAG  
 AGAGCTTCTGAAAAATTTGCCCTGATTGCTGGATACGGAAAGGCCTTATTGGAGCTGCTAG  
 ATGACTCTCCTGTCACTCCAGGTGAAGCTAGACCAGCGTACGATGGCTATGAAGCTTCTCGC  
 CAAATTATTATGGATGCTGAATCGGCCTTGAATCTTGGACCCTAGACATGGCTGCAGTCAA  
 ACCAACTCTTTCATTTTCATCAGACCGTTGATGACGTCTATGAAGACGAAGATGGTGAAGAAG  
 AAGAAGAACCTGAAATCCAAAATGGAGATATCCCCGGTCAAGTAGTCGAAGAAGAGGAAGTT  
 GAATGGACTACTGAAGTTCTGTAGATGATGAAGCCCATGAGGCCGATCATCATGTTAGTCA  
 AAACGGTCATACCTCCGGTTCTGAAAACATCTGA

>YLR003C 0.81 Cold

ATGTCTAATCCAGATGATTTAGATGATGGACTCGCCTATGATTTTGGATGCCGAACATGAAGT  
 AATTTTTGACGCCAAGGATGGTAGTCCCCCAACCAAAAAGGTACAAAAGAGGTCTATAGAAC  
 AAGATGACGATGACGTTGATGATATAGATGGGAAAAAAGAGGAGAGAAATTCAGAAGATGAT  
 TCGAATAGACCTATTTGAAAAGACAGAAAAAGCTACAGAAAAAATCAAAGCTAATTGAGAA  
 AAAGAAAGAGGAAAGCCAGTATATCGTCTCACAAACGAAAAGCACTTCCAGCAAGTTCACCAG  
 AAAAAATTATTGAGTACCTAACAACTTTGATACGAGAAAAAATCCTGACTTGAGTGTTTTA  
 GAATTAGAGGAACTTTACTTCAAAGAAATGATTTTCTTTCGACAGAAAAATTTGACGCTGA

ACGCAGATTAAGCAATTTCCCAGCCTTTATTCAAAAATTTTCCGTAGCTCCAAAAAAATTTG  
TTTTTCTATGTCTAATATTAGAGTAGCAGACGTTTATCGTAGTCTAAACGGTGGCAAAAAT  
TGCGTCAAATTTATCTCTAAAAGTAAACTAAAGGATGACATAGCCACCGTGGAACGTTTACT  
TACTGACAGCTCTAAAAAATCAAACAAAAATAAAGATTCACTATATTTTATTGCCACTCCAA  
CAAGAATGCAGAAAATTATAGAAGCTACTGACTTACTTTTCCAAGGTAAGGAAAAGTTAGAT  
ATCATTCTTGATGCAAGTTATTTAGATCCTAAGGATAATACTATATTATCATTGAGAAATGC  
AGCCGTCTCTGCCAAGTCTTGAAAACCTTTTGAATAAAAAAAGCTCCGTGAAAATACTGT  
TATATTA

>YBL010C 0.8 Cold

ATGAGCGATAGAGATCAGATAGAACCTGTCACAAATGCATTAGATGCAGAAAAGTGATTCTAG  
TGATGATTTTGGGAATTTTTCAGATGCCTCAGTTGAAAATGACCTCTATAACCAGAATTCTA  
CTTTAACGACGCTTCCGAATCTGTAGTAGATAACTGCTTGAATAAGATACTACCAAAGGGA  
GAATTTGACCTGGAAGAAGAAAACCATAAAGAATGACTGTTTCAAGCTGAGCAAACCTTATTGA  
AGATGAACGACCCCATGTCATTTATGAACAACTCGTACAATTAGATCCTGTGTTACAGCCAT  
TCATATGGAATAAATCTCATATACGCAGAAAACCTTGCTCCACATTTTGAGATTATCGGATAAT  
AATGGCTCTGAGGGTGTGGTACGAAGAGGGAGGAAGAACCCTTGAATGATGAGTTGTTCAA  
AAGGATATGCGATGCAGTGGAGAAAAATGAGCAAACGGCTACTGGTCTCTCCTGAGGGATA  
ATTTCAAATTTGACTATACACCACCAATGACTTTAAAATCTCTTCAAAGGAAGAGGAGCGT  
GAGCAAGAGCAGCATATACCGCAATTGCTTATGGCAGATTTTACTAGTATGGATGAAGAATC  
TTTACGCCAATACCACGATACATTTGTGTCAATCCATTGACTTTTTGGTTAGTAAATCAAGAT  
CATTGAAGAAAACAACAGCGAGACCTCCTAAAGGATAAGACAACTTTTGAAAATGTAGTGACG  
AATTTGACAGGACATACCCAAAGACTACAGCGAGACGAAAATTGCATTGTATAACAAAAAGCG  
AAACAAAAGAAAAGGTTTCAGTTGGGTAGGATACTAA

>YLR126C 0.77 Cold

ATGACAGTAAAAAAATAGCTATTTCTTTATACAGATGAAGATAACGAATGGAGTAAACCATG  
GGGCAATTTTGTGATATGGCTATCAAGCTATTAGAACAGACCAGGAAATTTGGAATGTATCG  
CAGAAGATGTCGAATATGAAGTGTCCACGTACAAAAAACGTGTTCCCTCAATTGTCAGAT  
CTTCAGAAAGATGAGTATTTAGGCATATACATCACTGGTTCAAATATGATTCATTTGATAA  
TGAAATTTGAATGGATTATGAAATTAAGAAGTTTCTTAAATGAGATGCTAACTAGCAAGACTG  
AATATCCGCCCCGTAGCTGGAATATGTTTTGGTTCATCAAGTTATCGCGGCTGCTCTAGGAAGT  
TCAGTTGGACGGAATCCGAAAGGTTTTGAAGTGGGGTGTGTCACTAAAACCTGAACTCTGT  
GGGTCAAAGTTATTTGGTGTCAAGAATTAATCTTTCTGAAGTGCACAGTGAAGTGCCTGT  
TCGATGTCCAGAGGGATACCAAATTTGGGCGTCAAGTGAAAATGTCAAACCAAGGATTT  
TACAGGCAAACAGAGTGTGACGTTTTCAAGGACACCCTGAATTCATAGTGATGTCGCTCA  
GAAGGGCTTTTTGAAGTCTCAAGACAAGCTTACCCTTGAAGAGTTTAATAGATACGAAAGAC  
AGTGCCAGGAGCTGGATAACAATGGCATAACAAGCTGCCAGGAATATTTGGAGGTTATTTG  
CAAAAATATGA

>YGR132C 0.74 Cold

ATGCTAATTTCTGCCAACTTATCGATGTCATCACCAAGGTGGCGTTGCCCATTTGGTATAAT  
TGCTAGCGGGATTCAGTACTCCATGTATGATGTGAAGGGTGGTTCTCGTGGTGTATTTTCG  
ACAGAATCAATGGTGTAAAGCAACAGGTTGTGGGTGAAGGCACTCATTCTTGGTGCCTTGG  
CTACAGAAGGCGATCATATACGATGTGAGGACGAAACCAAAGAGCATTGCTACCAATACTGG  
TACGAAGGATTTGCAAATGGTGTCAATGACCTTGAGAGTCTTACATAGACCAGAGGCTTAC  
AGTACCCGCAATATACCAAATTTGGGTCTCGATTACGACGAAAGAGTGTACCATCTATC  
GGCAATGAGGTTTTAAAGTCTATAGTAGCTCAATTTGATGCTGCTGAGTTAATTACTCAGAG  
AGAAATTTTCTCAAAAATCAGAAAAGAGCTTTCTACGAGGGCCAACGAATTCGGTATTA  
AGTTGGAAGATGTCCTATCACTCATATGACGTTTGGTCCCGAATTCACGAAAGCAGTTGAG  
CAGAAGCAGATTGCACAGCAAGATGCCGAAAGAGCCAAATTCCTTGTGCGAAAAGGCAGAGCA  
AGAGAGACAAGCTTCTGTTATCAGAGCTGAAGGTGAAGCAGAAAGTGTGAATTCATTTCAA  
AAGCCTTAGCTAAAGTTGGTGATGGTCTGTTATTGATTAGAAGATTAGAAGCTTCTAAGGAC  
ATCGTCAAACATTAGCAAACCTCATCTAACGTTGTCTATTTACCAAGTCAACATTTCTGGTGG  
TGGTAACAGCGAGTCTTCGGGATCACCAAATTCCTTGTCTTTGAACATTTGGCCGTTAA

>YJL110C 0.81 Cold

ATGGCATCGCAGGCTACAACCTCTTCGAGGCTATAACATTAGAAAACGAGATAATGTATTTGA  
 ACCAAAATCAAGTGAAAACCTCAACAGCTTAAATCAAAGCGAAGAAGAAGGGCATATTTGGGA  
 GATGGCCACCTTTAGGTTATGAAGCAGTATCTGCCGAGCAAAAATCGGCAGTTCAATTGCGT  
 GAATCGCAAGCAGGAGCGTCAATAAGCAACAATATGAATTTTAAGGCGAATGACAAGTCTTT  
 TTCCACATCTACTGCTGGAAGAATGAGTCCGGATACGAATTCATTACACCATATATTACCTA  
 AAAATCAAGTTAAGAATAATGGACAAACAATGGATGCCAATTGCAATAATAACGTATCCAAT  
 GATGCTAATGTTCCGTGTTTGTAAAGAACTGTTAACCTCTACAACACCATTATGGAGAAGAGA  
 TGAGCATGGAGCTATGCTTTGTAATGCGTGTGGTCTCTTTTAAAGCTTCATGGGAAACCCA  
 GGCCAATTAGTTTAAAACCTGATGTAATAAAGTCTCGAAATAGGAAAAGTAATACAAATCAT  
 GCACATAATCTGGACAACCTTTCGGAATCAGACGCTGATTGCAGAGCTTAAGGGTGATTGTAA  
 TATAGAATCAAGCGGTGCGAAAAGCTAACAGAGTAACATCTGAAGATAAAAAAGAAAAAAGTT  
 CGCAACTTTTAAATGGGAACATCATCTACTGCGAAGATATCCAAGAAGCCAAAAACGGAGTCT  
 AAGGAAAGAAGCGATTCTCACCTATCAGCAACAAAATTAGAGGTTACTGATGTGGGAGATTG  
 TTCGAGACCAAACCTTAAAGCCTAAACTGCCCAAACAAGATACTGCTATATACCAAGAGAAGT  
 TACTTACGTTCCCAAGTTATACGGACGTTAAAGAGTATTCAAATTCTGCACACCAATCTGCT  
 TTTATCAAAGAACGGTTCGCAATTCACGCAGCCTCTTTCCCTCAATGCTTCACATTCAGT  
 AACATCAAAAACAGGCGCAGATTCTCCTCAATTACCTCACTTATCAATGCTGCTTGGAAAGCT  
 TGAGCAGTACTTCAATATCAAAATAACGGAAGTGAATAGTGTCCAATTGCAATAATGGTATT  
 GCCTCTACCGCCGCAACTCTGGCACCCACTTCTTCACGGACGACTGACTCTAATCCATCCGA  
 GGTACCGAATCAAATTAGATCGACGATGTCTTCCCAGATATAATATCTGCTAAGCGTAACG  
 ACCCAGCCCCTTTATCTTTCCACATGGCTTCTATTAACGACATGCTTGAGACGAGAGATCGT  
 GCGATTAGCAACGTGAAAACCGAGACGACACCGCCTCATTTTCATACCGTTTCTACAATCTTC  
 TAAAGCTCCCTGTATATCCAAAGCAAATTCACAATCCATCTCAAATAGTGTCTTAGTCTG  
 ATGTTTCTGGACGAAAATTTGAAAATCACCCAGCTAAAGATTTAGGTGATCAGTTATCCACT  
 AAATTGCACAAAAGAAGAAGAAATTTATAAAGCTCAAAACTAGAATAAATGAGTTAGAAGTTGT  
 TACAGATTTATATAGGAGACATATCAATGAATTAGACGGGAAATGTGCGAGCTCTTGAGGAAC  
 GTTTGCAAAGGACAGTAAAACAAGAAGGGAATAAAGGAGGATAG

>YAR071W 0.77 Cold

ATGTTGAAGTCAGCCGTTTATTCAATTTTAGCCGCTTCTTTGGTTAATGCAGGTACCATAACC  
 CCTCGGAAAGTTATCTGACATTGACAAAATCGGAACTCAAACGGAAATTTTCCATTTTGG  
 GTGGTTCTGGGCCATACTACTCTTTCCCTGGTGATTATGGTATTTCTCGTGATTTGCCGGAA  
 AGTTGTGAAATGAAGCAAGTGCAAATGGTTGGTAGACACGGTGAAAGATACCCACTGTGAG  
 CAAAGCCAAAAGTATCATGACAACATGGTACAAATTGAGTAACTATAACGGTCAATTCAGCG  
 GAGCATTGTCTTTCTTGAACGATGACTACGAATTTTTTCATTCTGACACCAAAAACCTAGAA  
 ATGGA AACACACTTGCCAATTCGGTCAATGTTTTGAACCCATATAACGGTGAGATGAATGC  
 TAAGAGACACGCTCGTGATTTCTTGGCGCAATATGGCTACATGGTTCGAAAACCAAACAGTT  
 TTGCCGTTTTTACGTCTAACTCGAACAGATGTCATGATACTGCCAGTATTTTCATTGACGGT  
 TTGGGTGATAAATTCACATATCCTTGCAAACCATCAGTGAAGCCGAGTCTGCTGGTGCCAA  
 TACTCTGAGTGGCCACCATTTCGTGTCCTGCTTGGGACGATGATGTCAACGATGACATTTTGA  
 AAAATATGATACCAAATATTTGAGTGGTATTGCCAAGAGATTAACAAGGAAAACAAGGGT  
 TTGAATCTGACTTCAAGTGATGCAAACACTTTTTTTGCATGGTGTGCATATGAAATAAACGC  
 TAGAGGTTACAGTGACATCTGTAACATCTTCACCAAAGATGAATTGGTCCGTTTCTCCTACG  
 GCCAAGACTTGGAACTTATTATCAAACGGGACCAGGCTATGACGTCGTCAGATCCGTCGGT  
 GCCAACTTGTTCAACGCTTCAGTGAACACTATAAAGGAAAGTGAGGTCCAGGACCAAAGGT  
 TTGGTTGAGTTTCACCCACGATACCGATATCTGAACTATTTGACCACTATCGGCATAATCG  
 ATGACAAAATAACTTGACCGCCGAACATGTTCCATTCATGGAAAACACTTTCCACAGATCC  
 TGGTACGTTCCACAAGGTGCTCGTGTTTACACTGAAAAGTTCCAGTGTCCAATGACACCTA  
 TGTTAGATACGTCATCAACGATGCTGTGCTTCCAATTGAAACCTGTTCTACTGGTCCAGGGT  
 TCTCCTGTGAAATAAATGACTTCTACGACTATGCTGAAAAGAGAGTAGCCGGTACTGACTTC  
 CTAAGGTCTGTAACGTCAGCAGCGTCAGTAACTCTACTGAATTGACCTTTTTCTGGGACTG  
 GAATACCAAGCACTACAACGACACTTTATTTAAACAGTAA

>YGR007W 0.75 Cold

ATGACGGTAAACTTAGATCCGGATAAAGTTTGGATAGACGGCTGCTTTGATTTACACATCA  
 TGGGCATGCGGGAGCCATTTTGCAGGCTCGTCGAACAGTTTCAAAGAAAATGGTAAACTAT  
 TCTGTGGTGTGCATACCGATGAAGATATTCAGCATAACAAAGGAACACCAGTAATGAACTCT

TCAGAAAGATATGAGCATACTAGATCAAATAGGTGGTGTTCGGAAGTGGTTGAAGCGGCGCC  
 ATATGTTACAGATCCCAATTGGATGGATAAAATATCAGTGCCAATATGTTGTTTCATGGTGATG  
 ATATCACCATAGATGCTAATGGAGAAGACTGCTATAAGTTGGTGAAAGAGATGGGGCGCTTC  
 AAGGTAGTTAAAAGAACATATGGCGTAAGTACTACCGAGATTATACATAGAATATTGACGAA  
 AAAATCTTTGCCACCGACTCATCCTGATTATTATCCCACCACCCAGGAATTGAGTTTCTATT  
 CTGTCGCCCAAGATGCCGTTTCAAACATTGTTATGTCTTTCAGAGGGATTTGGACAATGTC  
 TTGGTCAATGGTGGATACAAATTCGATGCAGAAGATTGTGTTTATGTTGACGGGGATTTTGA  
 CTTATTCATATGGGGGATATTGATCAGTTAAGAAAGCTGAAAATGGATCTTCACCCCGATA  
 AGAAATTGATTGTTGGTATTACCACAAGCGATTACTCGAGTACCATTATGACGATGAAGGAA  
 CGCGTCTTGAGCGTTTTAAGTTGTAATATGTTGATGCCGTTATTATCGATGCTGACGCCAC  
 CTCATGTCTCAGTATAACTGCGAGAAGTATCATATTGGCACGGCTGTCTCACTGCTGCCG  
 GAAAATTCAGTGAATACTTGACTAAAGAGCTTATTGTGAAGAGGGTGGAAATCGCAAAGGGAG  
 GTTTACATTGCGAGGAACCAAAAAAAGGGAAATGTCCATATAA

>YNL214W 0.78 Cold

ATGACATCGATTAACAGTTTTCCAGGAATATTGACTGGCCTTCCAACATAGGCATTAATAAA  
 AATAGAGGGAACTAATCCAACGGTGAATGCCATCAAGGGCTTGTATATAATGGTGGATCAA  
 TTTATGCATTTCTATATTTTGTATTGCTATGTTTGTGAACCAACGCTACAAAAGCAGTAC  
 CAGCAGAGAAATGATTTTTCTTGTGTTTGTGCGTTTGAGAAGAATCATAGCGCAATT  
 GCAAAAACGACTGGTGTGACCCAGTATCGTCGTTGGGGTTCAACGAACAGAATAACTTTG  
 TGGAGAGGTCCACTCAAACCTCAGACGACAATATAATACGAGAAGATAATAGCCATTGGGCT  
 GAAATGATTTATCAACTGCAAAAATATGAAAACAAGAATTACAGTATTTTAACAGATCCTCAGG  
 CCAACCATCTGAAAGTATAGACGATTTTTGTCTTTCAAATTAAGATGGTACTGACCAGGTTG  
 AGTTAACAGATAGGTCCCGAGCTTCTCAAATAAATCAAGAAATATTATACAGGGAATCCGA  
 GAAATCAAAGGTTGGTTTGTGAATGGCCAAGTGCCAAGGTAA

>YOR011W 0.8Cold

ATGTCAATTTCAAAGTACTTCACTCCCGTTGCTGACGGGTCACTCACTTTCAATGGCGCGAA  
 CATTCAATTTGGCGCCGATGCTCAAGGCGAGTCAAAAAAGAGTTATGACGCTGAGGACAGCA  
 TGCCGAATCCGGCAAATCAACTAAATGACATAACCTTCCAAGCAGAGGCTGGTGAAATGGTT  
 TTGGTTTTGGGTTATCCACATCCACTCTATTTAAGACTTTGTTTCATGGTAAAACCTAGTTT  
 GTCATACTCTCCTCCAGGCTCGATTAAATTTAAAAATAATGAGTTTAAGAGCTTTTCCGAAA  
 AATGTCCCCACCAAATCATTTACAATAATGAACAAGATGTGCATTTCCATTTCTAACGGTA  
 GAACAAACAATTGATTTTGCCCTGAGTTGTAAGTTCGATATTCAAAAGGTGAGCGCGATCA  
 AATAAGAAATGAACCTTAAGAGAATTCCGCCGTGTCTCATGTATTGAAAACCTATTGTAGGAA  
 ATGATTTTTTCCGTGGTGTTCGTTGGTGAGCGTAAACGTATTTCTATTATTGAAACGTTT  
 ATTGCTAATGGTTCGTTTATCTATGGGATAATTCTACTAAAGGTTTAGATTCCGCCACAGC  
 TCTCGATTTTTTGGAAATCTTAGAAAAATGGCAAAAGCTACTCGTTCTGTAAACTTAGTCA  
 GAATTTCCAGGCAAGTGATAAAATTTGTTGATAAGTTTGACAAGATTCTTATGCTATCCGAT  
 TCCTACCAGCTTTTCTATGGTACGGTCGATGAGTGTGTTGACTTATTTTTCGTGACACTTAGG  
 TATTGAGAAAGATCCTAACGATTGTATTATTGAATATCTGACCTCTATCTTAAATTTTCAGT  
 TCAAAAATAAAAAATTTGGGGAAATTTATCAAATTCATCATCTGCTAGCGTCTCAAAACCGCA  
 ACAGGGGAAGTCACTAAGTATACTTATAATCTGATTTTCGATTTATATGATCAATGGAAACA  
 TTCTTCGTACTATAGAAATATAAAGCAGCAAATCCAGGGTCTTCAATTGATGACTCCATTA  
 AGGAAGTGGATCCCTCTGATGTCTCACCTATTTTTAATATTCGTTGAAGAAACAATTATTA  
 TTTTGCACAAAAGAGCTTTTCAACGAAGTTTGGGTGATAAAGCTTATATGACGGCACAAAT  
 TATTTCTGTGCTTATTCAATCTTTGGTCAATGGTTCACTGTTTTACGAAATTCGTTGACTA  
 CCATTTGGTTCATACTCAAGAGGTTCTTTAACCTTTTTCTCCATTCCTTTCTTCACTTTTCTT  
 TCTCTTGACAGATATGCCTATTGCCTTCCAAAGACAACCCGTCGTTAAAAAGCAATCCCAACT  
 TCACCTCTATACTAACTGGGTGAAACCCTTCAACAACAGTGTTCGACTACTGCTTTAAAC  
 TTTGTTTGGTAATTGTATTAGTATCATCTATACTTCTTGTCTCACCTGCAATACAAGGCT  
 GCAAGATTTTTCATTTTCTCCTGTTCTTCTTTTACAATTTCTGTATGGTGTCTTATT  
 CGCTTTGACGACACTAGTTGCTCCAACCATTTTCAGTTGCAAATTTATTTGCAGGATTTCTGC  
 TACTAGCTATAGCAATGTATGCTTCTTACGTCATCTACCTGAAAAATATGCATCCTTGGTTT  
 GTATGGATTGCTTATCTAAATCCTGCAATGTACGCTATGGAGGCAATACTGTCTAATGAGCT  
 TTACAATTTGAAGCTGGATTGTAGTGAGACAATTTGTTCCAAGAGGTCCTACTTACAACGATG  
 TTCCATTTTCCATAAGGCCTGTGCTTGGCAAGGTGCTACTCTGGGTAATGATTACGTTAGA



GGCCGTGATTACTTGAAGCAAGGTTTATCCTACACGTATCATCATGTGTGGAGAACTTTGG  
TATTATCATTGGTTTCCTAGTATTCCTTATGCTGTACTCTGTTTGCATCTCAATATATTA  
AGCCTTATTTCAATAAGGATGAAATAGAGCGCAACAATAGTCGTTTGCACAAGATGGCTACCA  
TTTTTGAATAAAAAGAGAGGTACCAGGTCTCTGCAAGAAATGACAGTAAGTATGTTGGTAT  
CCCAAAGTCGCACTCCGTTTCGTCTTCCTCGTCTAGCCTGTCGGCTGTCCATATCAGATAT  
CACCTCAAATAAGGAAATGGCTCTAAACGATTATAACGAGCAACCTATCACGGAAACAGTA  
GAGACTCAAAGCATATCATCTCTTGAAAAATATCAACTACACAGTTGGTACAAAGAACT  
GATTAATAATGCATCCGTTTCATCAGTTCTGGTTTGACCGCCTTAATGGGTGAGTCCGGTG  
CAGGTAAAACACTTTTGCTGAATGTCTTATCACAAGAGTTGAGACAGGTGTTGTTAGCGGC  
GAAATTTTGATCGATGGCCACCCATTGACAGATGAGGACGCGTTAAGAGAAGTATTGGTTT  
TGTTCAACAACAGGATTTGCATCTAGATTTGCTGTCTGTGAAAGAATCTCTGGAAATATCAT  
GTCTTTTGAGAGGTGATGGTGACAGGGCATACTTAGACACTGTTTCAAATTTACTGAAATTG  
CCATCTGACATTTTAGTCGCTGATTTAAACCCGACTCAAAGGAAGCTTTTATCTATCGGTGT  
TGAAC TTGTTACTAAGCCTTCACTTTTATTATTCCTAGACGAACCAACCTCTGGGCTGGACG  
CTGAGGCTGCACTAACAATCGTCAAATTTTTAAACAACCTTCTTTACAGGGTCAGGCTATT  
TTTTGTACCATTTCATCAGCCTAGTAAAAGTGTATCAGCCATTTTGACAATATTTTCTTATT  
GAAAAGGGGTGGTGAATGTGTCTTCTTTGGACCAATGGACGATGCCTGCGGCTATTTTCATGT  
CTCATGACAACACGCTCGTTTACGATAAAGAACATGATAACCCTGCAGATTTTCGTCATTGAT  
GCAGTAGGTAACAGTAACTCCTCGGCAGGGAAAGATACAGCGGAGGAAGCTCTTACTTTGAA  
CAAAGAAGCCATAGATTGGAGTGCATTATGGGAATCTTCTGTAGAAAAGAACTAGTTAAAA  
AAGAAACAGCTAGGTTAGAAGATGATGCTCGTGCCTGCTGGTGTGATTACACAACCTCATTG  
TGAAGCAGCCTTCTACTTACAGCAATTAGCTCTTATTACAAGAAGACAATATATTTGTAC  
GAAAAGAGACATGACTTATGTCATGGCCAAGTACTGTTTGAATGGTGGCGCTGGTTTGTTTA  
TCGGTTTCTCATTTTGGCACATTAAGCATAATATTATCGGTTTGCAGGATAGTATCTTCTTC  
TGTTTCATGGCTCTTTGTGTTTCATCTCCATTGATCAATCAAATTCAGGACAAAGCCTTGAA  
AACAAAGGAAGTTTATGTTGCTAGGGAGGCGAGATCTAACACTTATCACTGGACTGTTCTTC  
TTTTGTACAGTCAATTATTGAACTACCCTGGCACTTACAAGTTCCACACTATTTTTTCGTC  
TGTGCCTTTTTCTCTTGTGGATTAAACAACGCTGGCTGGAGTGCCGGTGTTTTTCTTTTTAAA  
CTATATGCTTTTTCGCTGCTTATTACTCGACTCTTGGTTTATGGCTGATCTATACTGCTCCTA  
ATCTACAAACTGCTGCTGTTTTTGTGCGTTTATTTACAGTTTTACAGCATCATTCTGTGGT  
GTTATGCAACCATACTCTTTGTTTCCAACCTTTTTGGAAATTCATGTACAGGGTTTTCGCCATA  
CACATATTTTTGTGAAACTTTTTGTTAGTATTCTATTGCATAACTGGGAAATCAAGTGTGACA  
TGTCGGAGATGGTTCCCTGGTCAACCTCTGACGGGGCAATCTTGTGGCCAATTTATGGAAGCT  
TTCATAGAAGAATACGGTGGCTATCTACATAATAAGAACACTTTTCACAGTCTGCGCTTATTG  
TACGTACACTGTTGGCGATGACTTCCCTGAAAAATGAGAATATGAGTTACGACCACGTTTGG  
GAACTTTGGTATTGAATGGGCTTTTTGTTGGTTTTCAATTTCTTTGCGATGTTTGTGTTTAC  
TACTTAACTTACGTGGCAAGAATATGGCCAAAGGTCTTTAAAATTATCACCAAAGTAATTCC  
ACACAGAGGGAAGAAGCCTGTACAGAACTAA

>YGR191W 0.74 Cold

ATGCCTAGAAACCCATTGAAAAAGGAATATTGGGCAGATGTAGTTGACGGATTCAAGCCGGC  
TACTTCTCCAGCCTTCGAGAATGAAAAAGAATCTACTACATTTGTTACCGAACTAACTCCA  
AAACCGATTCTGCATTTCCATTAAGTAGCAAGGATTCACCTGGCATAAACCACAAAC  
GATATTACCTCTCAGATCGCTTCCGTGTAATGAAGACACAGAGCAGGAAGACATCAACAA  
CACCAACCTGAGTAAAGATCTATCCGTGAGACATCTTTAACTCTAGCTGTCGGGGGTGCAA  
TAGGTACTGGTTTATATGTGAATACGGGTGCTGCTTTATCTACAGGTGGTCCGGCCAGTTTA  
GTTATTGATTGGGTTATTATCAGTACATGTCTTTTTACTGTGATTAACCTCTTGGTGAGCT  
GTCCGCTGCTTTTCCCGTTGTTGGTGGGTTCAATGTTTACAGTATGCGTTTTATTGAGCCTT  
CATTTGCATTCGCAGTGAACCTAAACTATTTAGCACAATGGCTAGTTCTTCTACCCTTGGA  
TTAGTGGCCGCATCTATTACTATAAAAATACTGGAATGATAAAATTAATCCGACGCCTGGGT  
TGCTATCTTTTATGCCACCATTGCACTGGCTAATATGTTGGATGTTAAGTCATTTGGTGAGA  
CCGAATTTGTATTGTCCATGATTAATAATCCTCTCCATCATTTGGCTTTACTATCTTAGGTATT  
GTTTTGTCTGTGGTGGTGGGCTCACGGCGTTACATTGGTGGTAAATACTGGCATGACC  
AGGCGCTTTTGTAGGGCACAGCTCGGGAACCTAGTTTAAAGGTTTATGTTTCAAGTTTTGTTA  
CCGCTGCCTTTTCTTATTCCGGTATTGAAATGACTGCTGTCTCCGCTGCTGAAAGTAAAAAT  
CCAAGAGAAACCATTTCCAAGGCAGCAAAGAGAAGCTTTTTGGCTGATTACCGCCTCTTATGT  
GACTATATTGACTTTGATTGGTTGCTTGGTTCATCCAATGACCCTAGGTTACTAAACGGTT

CAAGTTCAGTGGACGCTGCCTCATCTCCTCTGGTTATCGCAATTGAAAACGGGGGTATTAAA  
 GGTCTACCATCATTAATGAACGCCATTATTTTGATTGCTGTTGTTTCCGTGGCTAACAGTGC  
 TGTTTATGCATGTTCAAGGTGTATGGTCGCCATGGCTCATATTGGTAATTTACCAAAATTTT  
 TGAACCGTGTTGACAAAAGGGGTAGACCAATGAATGCTATCTTGTTAACTTTGTTTTTGGT  
 TTGCTTTCCTTTGTGGCAGCAAGTGATAAGCAAGCTGAAGTCTTTACATGGTTGAGTGCCTT  
 ATCTGGTTTATCGACAATTTTCTGCTGGATGGCCATTAATCTTTCCCATATTAGATTTCCGC  
 AAGCCATGAAAGTTCAGAAAGGTCTTTAGACGAATTACCTTCATTTCTCAAACCTGGCGTC  
 AAGGGATCCTGGTATGGTTTTATCGTTTTATTTCTGGTTCTTATAGCATCGTTTTGGACTTC  
 TCTGTTCCCATTAGGCGGTTCCAGGAGCCAGCGCAGAATCATCTTTGAAGGATACTTATCCT  
 TTCCAATTTTGATTGTCTGTTACGTTGGACATAAACTGTATACTAGAAAATGGACTTTGATG  
 GTGAAACTAGAAAGATATGGATCTTGATACCGGCAGAAAACAAGTAGATTTGACTCTTCGTAG  
 GGAAGAAATGAGGATTGAGCGAGAAACATTAGCAAAAAGATCCTTCGTAACAAGATTTTTAC  
 ATTTCTGGTGTTGA

>YIR028W 0.68 Cold

ATGGCTAACGACGCTCTAAGTGCTATTTTCAGTAATCCTTCGAGGAAAAGGTGTCCAACCCTC  
 CACATCTATTGTGTATATAACAAATGAAGATGATATTATAGATGTGGAAAATGGGAAGT  
 TCAACAAGAACAAGAATATCAACACTAATGTGTATGTGGACAACCTCAATAGAGGAGAGC  
 GAAGTCGTGCCCTTGCCCGAAAACAAGTCCATCTGGAGTAAAATATACTACGATTTTCAATGT  
 GTTAGACAAGACAACCTTTGAATGTTTTCGTTGAAAGAGTCGTTCTTGTATAACAGAGACTTGA  
 AACCGGTTGAAGAAGAAAGAGGTGTTGGTCTGGTTCAATTACTTATATTTCTGGCTGGCA  
 GACTGTTTTCAATATTAACACATGGCAAATAGCTGGTACAGGTCTACAACCTAGGTCTGAATTG  
 GTGGCAATGTTGGCTTACAGTTTGGATCGGCTACACTTTTGCAGGTATCTTCGTAGTATTGA  
 ACTCGAGATTTGGTTCGCATATCACTTATCTTTCCCTATTACTGTTAGGGCCTCATTTGGT  
 ATATTCTTTTCTATGTGGCCGATTATAAATCGTGTCTGTGATGGCTATAGTATGGTATGCCGT  
 GCAAGCCTGGTTAGGTGCAACGCCCGTGGCACTGATGCTAAAATCTATTTTTGGCAAGAATC  
 TGGAAGATAGAATCCCAAACCATTTTTGGTCTCCAAATAGCACTACTTTTGAATTCATGTGT  
 TTCTTTATATTTTGGGTGGTCAGTATAACCATTTGTCTAGTGGCTCCTCATAAAATCAGGCA  
 TTTATTCACAGTAAAAGCAGCTTTGATCCCCCTTCGCAGCCTTTGGATTTTTAATCTGGGCTT  
 TGAAGAAATCGCACGGTAAAATGAGTTGGGGACGCTGAATGATTATTCACCTCATGGTTCC  
 GAATTTTCATGGATATTCGTTAGATCCCTAATGGCCTGTGTTGCTAACTTTGCCGCTTTGAT  
 TATCAACGCCCTGACTTCGGTAGATTTGCCAAAATCCTCAAGCGTCTTTGTGGCCACAAT  
 TGGTTGCCATCCCATTTGTTCTTCGCCATAACATGTTTGATCGGTATCATTGTTACTGCGGCC  
 GGTATCACTTATATGGGGTTAACTATTGGTCACCACTGGATGTACTTGGTCAATTTTTGGA  
 GACCACTTACACCAGAGGTACTAGGGCTGGTGTGTTCTTGATTTCTTTTGTATTTGCCCTTAG  
 CTCAACTGGGTACAAACATTTCTGCCAACTCTCTGGCATGTGGTGTGATATGACGGCTTTG  
 TTTCCAAGATATATTAATATTAGAAGAGGTTCTTTATTCTGTGTGGCAATGGCTCTATGTAT  
 CTGTCCATGGAACCTTAATGGCCAGTTCAAGTAAGTTCACCAGCGCTTTGGGTGCTTATGCAA  
 TTTTCCTTTCCAGTATTGCTGGTGTCAATTTGCGCGGATTATTTCTAGTAAGAAGAGGATAT  
 GTGAAATTAACACATTTTATTCTTGGCACAGAAGGGTTCCTTTTACATGTTTGGAAACAAATT  
 TGGTGCCAATTTGGAGGGCCTTTGTTGCGTATATTTGCGGTATCGCTCCAAATTTACCAGGTT  
 TTATAGGTGATGTTGGAGCTCCAAAATACGGTTTTCAGAGGGTGCAATGAGGTTATACTAT  
 TTAGGTTATCCGGTAGGTTTCTTTATTAGTGCGGTGATATACCTCATATTATGTTACTTTTT  
 TCCTGTCCCTGGTACTCCCGTAACCAATTTCTGACAGAGAAAGGATGGTTCCAAAGATGGG  
 CTTATGTTGAGGACTTCGAGCAAGATTGGAAGAATGAGTTACGTAGGGATGACCTCTGCGAT  
 GACACAGTCAGTATCTATGATGGCACCAGGAAAAGATAGTTTACTAA

>YLR248W 0.82 Cold

ATGCTTAAAATAAAGGCCCTTTTCTCGAAAAAGAAACCGGATCAGGCAGATTTGTCTCAGGA  
 ATCTAAAAAACCATTCAGGGTAAGACCAGGTCAAGCGGTACAAATAACAAAGATGTTTCCC  
 AGATTACTTCTTCCCCTAAGAAAAGCTTTCAGGACAAAATATAGTTACGTACCCGAGTGTT  
 GTCGCAGATGACCATCATATGAAGTCTTTAACCAGTGAATTAGTAACCACGATAGACTCGGA  
 CTCTTCACCGAGTGATAATATTACCACGGAAAATGTGGAAACAGTTACTTCCGTGCCAGCTA  
 TCGATGTCCATGAAAGTAGTGAAGGTCAATTAAGTTCGACCCCTTAATATCTGACGAATCT  
 CTTTCGGAACAAAGCGAGATTATCAGTGATATCCAGGATGACAGTACTGATGATGACAATAT  
 GGAAGATGAAATTCGGGAAAAATCCTTCCTCGAACAAAAGGAATTGATAGGTTACAAGCTGA  
 TCAATAAAATCGGTGAAGGTGCTTTTTCAAAAGTCTTTAGAGCCATACCTGCTAAAAATAGT

TCTAATGAATTTTTAACTAAAACTATAAAGCTGTTGCCATTAAAGTTATCAAAAAGGCAGA  
 TTTATCCTCGATTAATGGTGATCATCGTAAGAAGGACAAAAGGGAAGGACAGCACTAAAACTT  
 CTTCCAGAGATCAAGTCTTGAAGGAAGTTGCACTACATAAGACGGTTTTCCGCTGGTTGTTCA  
 CAAATTGTCGCGTTCATAGACTTCCAAGAAACAGATAGCTATTATTATATTATTCAAGAGTT  
 ACTAACCGGTGGGAAATCTTCGGCGAAATGTTAGGTTGACCTATTTCAAGTGAAGATTTAT  
 CAAGGCATGTAATCAAACAATTAGCACTGGCTGTTAAACATATGCATTCACTAGGTGTAGTG  
 CATCGTGATATAAAACCTGAGAATCTTCTTTTTGAACCGATTGAATTCACACGCTCTATAAA  
 ACCAAAATTGAGGAAATCGGATGATCCGCAAACAAGGCAGACGAGGGAATTTTCACACCAG  
 GAGTTGGTGGTGGTGGAAATTGGTATAGTAAAACCTAGCTGATTTTGGTTTGTCTAAACAAATA  
 TTTTCCAAGAACACCAAGACTCCTTGTGGTACAGTCGGTTACTGCCCCGAAGTTGTCAA  
 AGATGAGCATTATTCTATGAAAGTGGATATGTGGGGGATTGGTTGCGTTTTGTACACAATGT  
 TATGTGGGTTCCCGCCATTCTATGATGAGAAAATTGACACTTTAACTGAAAAAATATCAAGG  
 GGTGAGTATACCTTTCTGAAACCTTGGTGGGATGAAATCAGCGCCGGTGCCAAGAATGCCGT  
 GGCTAAGCTATTAGAAGTAGAGCCGTCTAAAAGATACGACATTGACCAGTTTTTGGACGACC  
 CATGGTTAAATACATTTCGATTGTTTACCAAAGGAGGGCGAATCTTCACAAAAGAAAGCAGGT  
 ACTTCCGAAAGACGCCATCCGCATAAGAAAACAATTCCAACCTATTTCAAAGAGACTCCTCGCT  
 ACTGTTTTTACCAGCTGCTGTTGCTATGCGTGACGCCTTTGATATTGGTAATGCTGTGAAAC  
 GTACCGAAGAAGACCGTATGGGAACACGTGGAGGATTAGGCTCGCTTGCTGAGGACGAAGAA  
 TTGGAAGATAGTTACAGTGGCGCCCAAGGCATGAACAGCTGGAACAAAATATGTTCCAATT  
 AACGCTGGATACGTCCACGATTCGCAAAGAAGAAAAAAGTTCAAGAAAATGACGTAGGGC  
 CTACAATTTCCAATAAGCGCCACTATCAGGGAATAG

>YOL152W 0.81 Cold

ATGATTGAAGAAAGAGATTTGGTTTTAAGCAATGGTATCCATTGTATTGCTGACATCCACTC  
 CGAACTATACGCCAGGTTAAAAAAGAATCGCAGGCAGCGACACCATGGGTGTACCAAAAAC  
 AATACGAAAATTCGTCACCTACTTTGTGCGCTGTGATAAATTTTTTTGCTTTTGATAAAAAAG  
 CTGGCATTATGTATTATGATTCAGTGAGGAATTTCTTCCAGAAAAGAAGAACTCGCCGAC  
 TACCCCTTCTGTATTCCCTTGTCTGAATAATGACGAAACTTGTGCGATTCAACAGATACATTT  
 GCTACAGGAAATTTCCCACGTTGATATTTTTCTTATTTAGGTATTTCCGACATCTGTGGGTACT  
 TTTTGTAGTAGTAATGGCTACCACTTTATACACACTTCTATACTGCTTTGTTCCCTCATCCATT  
 CTACAGACCTTGTGCAGGATTTGGTTCGCCGCTTTGCTGTTTCGTGCAGGCATAATGGCAA  
 TATCTTTGGTTCCGTTTTGTATTCTCACTTTCCGGGAAGATCAACGTTATAGGTTGGTTGGTT  
 GGGCTTTCGTATGAAAAATCAACATATAACCACCAATGGGCATCCATTCTTTGTTTATTCTT  
 TAGCTGGGTTTCATGTCATTCCCTTCCCTACGTCAAGCACGACATGAGGGAGGATATGAAAGAA  
 TGCATCAACGGTGAAGGCATCCGACATGTGGAGGAGTGGTGTCCCACCCATCTTATTTTTG  
 AATCTGCTATGGTTATCTTCGCTGCCTATTGCTAGAAGACATTTTTATGAGATTTTTTTGCA  
 ACTTCATTGGATTTTAGCTGTTGGATTTTACATTAGTTTGTCTATCATGTATATCCCGAAT  
 TGAATTTCCATATGTATCTGGTTGCTACAATTGTGGTTTTGGTTTGCACAACCTGTTTTACAGA  
 CTAGCTGTGAAGGTTATTTAAGACCTGGTAGAAGTTTCATGGCCTCGACCATTGCAAAATGT  
 CAGCATAGTCGGCGAAGGATGCGTAGAATTGATCGTCAAAGATGTGGAAATGGCCTATTCCC  
 CAGGTCAACACATATTTCGTGAGAACTATTGATAAGGGCATCATTTCCAACCATCCATTTTCT  
 ATCTTTCCGAGTGCAAAGTATCCCGGAGGAATAAAAATGCTGATTAGAGCCCAGAAAAGGGTT  
 TTCTAAAAGGCTATACGAAAGTAATGACGACATGAAGAAAATTTCTTATTGATGGGCCTTATG  
 GTGGAATCGAGAGAGATATTAGAAGTTTTACCAATGTCTACTTGATTGCTCTGGTTCAGGT  
 ATATCTACATGCTTACCTTTCTGCAAAAATATGGCCCCATACTCCATAAGACAAACTTAGA  
 AGTTATTACATTGGACTGGGTGGTAAGACATAGGGAGGATATATCATGGATTAGAGATGAAA  
 TGTGTACCCTCTCAAATAAATTTGCGCCAGTTATTTTTAGATGGGAAAATTTGTGGTTAGAATT  
 TACGCTCTGCTCGGACAGTACCGTCCCTGGTATTATTTAAACCTTTCCCTCAAACAATAGACAC  
 CGCCAGTGACCAATCTGATTTAGCTAAAAGAGAAAAAGATACCGAATTCGGCCAGGATGATA  
 CTGAGTCAAATTTCACTTTTCGACAAATCCAATAACGAATATAAAGGTCTCATCACCATTATT  
 CCTTCCAACCTGATTTGAATCAGGTCATTAATGATTACCAAATTTGGGTTCAAGAACTGCTT  
 CATTTGTTTCAGGTTCTGACAGCCTAAGGTATACCGTCCGAAATTCGGTGGCAGGTTTACAGG  
 CCAAGGTTTTTTCTAACAAAATGTGCAAGAGTGCTATTTACACAGCGAGATTTTGGCTAC  
 TAG

>YCR098C 0.73 Cold

ATGGAAGACAAAGATATCACATCGGTAAATGAGAAGGAAGTGAACGAGAACACTAATCCTAG  
AATAATAAAATATGATGCCGAGAGGCGTGCAACCCGTAAGAACTCAAAGAAAGATAAAT  
GGAAAAACATAGTTACAATCATGCGTCCGGTTTTGCTCTGATAAGTGATGGTTACGTAAAT  
GGTCAATGAGTATGCTAAACAAGTTTTTTGTTATGGAGTACGGTAAGAAAACTATAGCTC  
AAAAGTGTGACTAGAGTTTCCAACGCAGCCCTAGTTGGTATTATTTTTGGCCAATCTTTA  
TGGGTATCGCTGCTGATTATTATAGTAGAAAATCTTGTATCCTTGTGGCCACTGCTATCTTG  
GTTATTGGTAGTGTCTGTGTGCTGCCTCTCACGGTACTACTGTACCTGGCATGTTTTGGAT  
GTTAACAGTTATGAGAGGTTTGGTAGGTATTGGTGTGGTGCAGAATATCCTACCAGTACAT  
TAAGTGCTAATGAGTCTGCTAATGAATATACCACTACAAAAGAGGTGGTATCCTGGTTATG  
GTGACAAATTTGCCACTAGCCTTCGGTGGTCCATTTGCTACGATCATCTTTTTAATCGTCTA  
CAAAATCTGTTTCAGGAACAAAACATTTAGAGGGCGATCTGGAGGACTGTTTTTGCAATAGGGT  
GCTTCTGGCCATTGAGTGTGTTCTATTTTAGATGGAAGACTGCTACTACAGAAGTCTATGAA  
AAAGGTAGAATCAAGAGAAATATACCATATTTCCCTAGCATTGAAATTTTATTGGAAAAGGTT  
ACTTGGTACATGTGGTACATGGTTTATGTATGATTTTGTACCTTCCCAAATGGTATTTTCA  
GTTCAACAATTATCAGTTCCGTTATCAAGGACCAAAATGATTTAGTAAAAGTGGCAGAGTGG  
AACTTACTGTTGGGAGTTTTAGCTGTACTGGGTGTACCAATTGGTGTCTTATCTGTCCGATCG  
TATTGGTTCGTAATAATACGTTGATGTTTTGGTTTCTCTGGGTACATCATCTTTGGTCTAATCA  
TTGGATGTGCGTACGACCAATTGAAAAAAATCACCCCTTGTTTTATTATCTTCTACGCATTC  
ATGAATATGTTAGGTAATGCTGGACCAGGTGATATGCTTGGTGTATTAGTAGTGAAGCGTC  
AGCAACCGCTGTTAGAGGTGTTTTCTATGGTTTATCTGCTGTGACTGGTAAAATCGGTTCTG  
TAGTAGGCGTCGAATGTTTTCCAACCCATTAGGGATAAATTTGGGTGCAAGATGGACTTTTTATT  
ATTGCTGCAATTTGTGGTCTTATTGGTATCATTTATTACATATTTCTTTGTTCCACATTTCTCT  
TGAAAGCGATTTAATGAAGCAAGACGTTGAATTTTCACAACTATTTGGTATCCAATGGCTGGA  
CTGGTAAGATGGGATTTGATGAGACAGATGAAGAATCAATGGTTAGAACTATTGAAGTTGAA  
GAGAATGGTACTAATTGTAGTAAGAAAAACGCAGAAATAATTTTCAAGTCAGACAGGTTCGATCA  
AAGTTGA

>YDR161W 0.81 Cold

ATGAGTGAACCTGAAGCCACAATTAGGCCAAGCCAAAGAAGCCCTGGCTGAAAATAATGCCAA  
AAAGGCGCTCAAAATATTGAAGCCGTTCAAAGTTCACTGAAAAAGAAAACGCAACAATG  
TAATACTGAATGAAGTGTGGCCGATGCATACCTGGATAATGGACAGGTAGAGAAAGCCTAC  
CCAATTTTAGCGCGTGTGCGAATTAGATCCTGAGGGACAAGTTGGCGGACCGGACAAATTT  
TTTTACCATGGGTCAAATCATGGGTGGACAGGATGGTGTATCGATAATAACTCGCGGAATAA  
TGAACATCTCTAATACTGGAGGTGAAATGTTAACCAACGTTCAAGTTGAAAAGATTGTAGGT  
GGACTGCTTTCTGTGATTGAAATTTGGATGACGGATTTATGTATGGAGCCAAATGCAGAAGA  
GCAGTGTGAGGAGTTAATACAAAAGGCGATGGAACCTCACAGAGGGAAAATCTCCTGAAACAT  
GGTCTACCCTGGGTTCTATCAAAATCTCGCAACAAAATTTGGAGAAGCTTATGAAGCATTTC  
TCACAAGCCTGGAATTTCTTTGAGTTGAAAAACAAGAAATTTGGTAGCGGTATAAATGAAA  
TGGTGACACAACCTCAGAAAGCTGGTTTACAGTCAGAGTATGTAGATCTTTTACAACCTCTTT  
TATCTTTAACAAGATGTGCCCTCGAAGTGGGAGCTTACGAAGTCGCATTGAAAGTTATTGCC  
GCAGTAAGAGATATAGATGAGGATAACATAGAGGGTTATTATCTAGAGGGTTTTACTTATTA  
TTTAATGAGTAAATTAGAAATTTTCAAGTTGAACAATCCCGAAGTAAGCCTGCGTCCGGAAA  
ATATATACGAGTTTAACCAACTCATTCAAGAAGTTCTTTGGATTTATCCCACGAACCAATC  
TCCAGTTAATCTATGACTCAAGATTAGCGCTAAGTTTTGCATTGCAAGCAGGTGTCAATGC  
TGACAGCAAAGATGAAATTTGTGCAAGAATTTATGGGCGGTGCTAATGCTTTACTCCAAGAAA  
TTGGTGGTCTCTAGATCCAAGTGAGTTAACACAAATCAAGAAGGGTGATTTAGTGAATGAG  
AATGAAGACTTGGAAGAGTTGGACATAGAGGAAGAATATCTGACTAA

>YLR085C 0.75 Cold

ATGGAACACCACCCATTGTGATTGATAATGGCTCATAACGAAATCAAGTTTGGTCCCTCCAC  
GAATAAGAAACCGTTCCGAGCTTTAAATGCATTTGGCCAAAGATAAATTTGGGACATCGTATT  
TATCAAATCATATCAAAAACATCAAAGATATTTTCATCTATCACCTTCAGGAGGCCACATGAA  
CTAGGACAGCTCACATTATGGGAATTAGAGAGTTGTATATGGGATTATTGCCTTTTCAATCC  
TTCAGAGTTTGTATGGGTTTGTATCTGAAAGAGGGAAAGGGTCATCATTTGGTTGCTAGCGAGA  
GCTGTATGACTTTACCAGAATTAAGTAAGCATGCCGACCAGGTGATATTTGAAGAATATGAA  
TTCGACAGTCTTTTCAAGTCTCTGTAGCAGTCTTTGTACCATTTACCAAGTCATATAAGGG  
TGAAATGAGAACAATTTCAAGTAAGGACGAAGATATCGATATTGTCCGTGGCAACTCAGACA

GTACAAATTCACATCAAGCGAGTCCAAGAATGCGCAGGATTCAGGTAGCGATTATCATGAT  
 TTCCAATTAGTTATTGATTCCGGGTTAATTGTACTTGGATAATTCCTGTCCTGAAGGGAAT  
 ACCGTACTATAAAGCGGTAAAAAATTGGACATTGGAGGCCGTTTCCTAACTGGGCTACTAA  
 AGGAACTCTATCATTAGACACTACAATATGATGGATGAAACCATACTTGTAAACAATATC  
 AAGGAACAATGCTTGTTCGTTAGCCCGGTGCTTATTTTGTATAGTTTCAAACGAAGGATAA  
 GCATGCACTAGAATATGACTTCCGACTTCCAAACAAGCTTCTTGGTTACGTAAGAAACC  
 CCAGAAAAGAAAATGTACCGTTACCTGAAGATGCGCAGATCATAAACTGACAGATGAGCTT  
 TTCACAATACCAGAACTTTTTTCCATCCAGAAATTTGCAAATTAATAACCAGGCATTTGT  
 GGAGGCCATCCTAGAGAGCCTTTCATGTTGCCCGAAATAGTGCACCTCTTATGGTAGGAA  
 ACATTGTATGTACAGGAGGAACTTTAATCTGCCCAATTTGCCCCAACGGCTTGCAGCAGAA  
 CTACAAAGGCAATTACCCACAGATTGGACTTGTATGTTTCGGTGCCCGAAGGTGACTGTGC  
 TCTGTTTGGGTGGGAAGTGTATGTCACAGTTTGCAAAGACAGATTCCTACCGAAAAGCGAGGG  
 TCACAAGAGAAGAATACTATGAGCATGGTCCCGATTGGTGTACGAAGCACAGGTTTGGTTAC  
 CAGAATTGGATATAA

>YDR365C 0.75 Cold

ATGGCTGGAGAGAACCCAAAGAAGGAAGGTGTAGATGCTAGGTTTGCCGGGATCTACAGCGA  
 TCCATAATTTAAGAACACGAAAACCAAAGATCATAAGATCAAGTTAGATTCTAGGTTAGTA  
 AGAAGGATCTGGAGGTCCAGCATAAATCTAAGGTTGACAAGTATGGTAGAAAAGATCAAAAAT  
 GCGCAGAATAACAGGGAATTGGAAGATTTGACAAATATTTGAAAAGGAAGCAGAAAATGA  
 TGAAGATTCAGAAGTTAATGCGAAAACAGTAGTGGACCGTGCCCGTGGTGAAGTTCTGATG  
 ATTATGTTAGCTCTTCTGATGAATTCCTTCTGATTCTGAATCGTCCGGAGAAAAGTGAA  
 GTTGAAAGCGAAGAAGAAAATGAAGTAGAAAATGAAAATGCCAAACCAGAATCTGGTGACAT  
 CTCTAAGAATTTGGCCGTCGTAAATTTAGATTGGGACCATGTTAAATCTGAGGATTTGATGA  
 TTACCTTTTCCAGTTTTCGTTCCATAAGGTGGTAAAATGAAAGAGTTGCTATTTATCCAAGT  
 GAATTTGGTAAAAGAAAATGCAACGCGAGGAAGTTGAAGGACCTCCAAAGGAACTTTTCCA  
 AAAGAAAATAAGAACAAAACCTCCAAAAGAAGAAAACCTGATGACTCTGATTCTGATATGG  
 ACATCGGTATTAAGGATCTTTATGAAGAGGGAGATGCTGACAAGGACGTGGATTCCAGAGCT  
 TTACGTCAATACCAGTTGGACAGATTAAGATATTTATACGCAATAGTTTATTGTAGTGATAC  
 AACACCTCCAAAGCTATCTATGATAACTGTGATGGTACCGAATATGAGTCAACCGCTAATA  
 TGTTCGATTTAAGGTATGTTCCCTGATGGTATGACTTTTGGATGATGATGTAAGAGATGAATGC  
 AGTATATTGCCTAAGAACTATAGGCCACACCAGTTTAGCACAGATGCTCTACAACATTCAG  
 CGTCAAATTTGACCTGGGATGAAACGCCAGCTGATAGGGTCAAGTTGCTAAGAGGGCCTTTA  
 CCCAAAAGGAAATGATGATATGGACTTTAAGGCTTACTTGGCGTCAGATAGTATGATGAATCG  
 GATGGGCAGGTCGATGAAGAGGCGAAAATAAATAAAGTTCGTTGGTTGGTACTTTGGGTT  
 TAATTTCAAGAAAGAAACCCCTAACGATGAAGATGAAGAAGTTGATATGAAATTACATTTA  
 CTCCAGCCTTTGGAAGGAGGAAACGAGAAATCGTCGGAAGACAAAGAAGAAACGACTATAGAG  
 AAAATAAGAAGAAAAGAGAAGGAACGTCGTAAAGCAAGAAAGCAGAAAGTAAAGGAATTGAA  
 ACAGCAGTCGGAGAAGGATAAGAAAAGCAAGTTGAAATCTGTTAATAAAAAGCATACTAACG  
 ATGAAGAGGAGATCGAAAAGAAATGCCAAATCAAAGGCTGAATTGGAGCTTTTAAATGGATGAT  
 GATGATGATACCGAAACTCAGGGCACAATAAATAACAAAGCACATTTCAACATGAACGAAAT  
 CTTAAGATCAGAAAAGAAAACACAAGAAAGGCCGGTATCAAAGAAAGAGAGAATTGTTG  
 AAGACACCTTTACACCTGATTTAGAAGATCCTAGATTTAAAGAAGTCTTCGAAGATCACGAT  
 TTTGCTATCGACCCGACCCAGCCTGAATTCAAAGGTACACAAGCTATGAGTAAAATCCTAAA  
 AGAACGTAGTAAACGTGTTAAGAATAAGAAAAGAAAACCTTGGCCGGTAGTGAAAACAATATGA  
 CCAATAACGCAGATGATAATGAAGATATTGGTAACTTGGTAAACAAGTTGAAAAGAAAAGC  
 AAATCATCCAAGAAGGTAAAGGTTTAA

>YGR113W 0.76 Cold

ATGAGCGAAGATAAAGCTAAATTAGGGACCACAAGGTCTGCCACGGAATATCGTTTATCCAT  
 TGGTAGCGCTCCGACTTCAAGAAGGTCGTCTATGGGTGAATCCTCATCCCTGATGAAATTTG  
 CTGATCAAGAGGGATTAACGAGTTCCGTTGGCGAATATAACGAGAATACCATAACAACAGCTT  
 CTGTTGCCTAAAATAAGAGAACTGAGCGATTCAATCATTACTTTAGATTCCAATTTACGCG  
 CTTAAATTTTATCCACGAGAGTTTAGCTGATCTTAATGAATCCCTAGGTTGCTTGTGTACG  
 GTATTATGAGCAATTCATGGTGCCTAGAATTCACAGGCGCCTCATGATATTCAGACGAT  
 TTGATCGCTATTAACAATGAAATCGTTGGAAGATGAGAAAATAAATACTTAGTAATGGAAC  
 CTCCAATATGGAACGCGGGATTAAGAAGAAAAGACGAACAAGGTGAAAATGATTTGGCCA

AGGCATCTCAGAACAAACAGTTTAACCAGCCGCTATTTCCCTCCTCACAAGTAAGAAAATAC  
 AGGTCATATGACAACAGAGACAAGAGGAAGCCCTCCAAGATAGGCAACAACCTTACAAGTAGA  
 GAATGAGGAGGACTATGAAGACGATACTAGTAGTGAAGCTTCTTTTGTCTAAATCCAACAA  
 ATATCGGTATGTCCAAATCATCTCAAGGTCACGTGACTAAAACCACGCGTTTGAATAATAAT  
 ACCAACAGTAAACTGAGAAGAAAGTCCATCTTACATAACAATCAGAAATAGCATTGCTCCGG  
 CGCTGATTTACCCATCGAAAACGACAATGTTGTTAATTTGGGAGATCTGCATCCAAATAATC  
 GAATATCACTCGGAAGTGGTGCTGCAAGAGTGGTCAATGGGCCCGTTACGAAGAACAGAAAT  
 TCAATGTTCTCAGGACGTGCTGAAAGGAAACCCACAGAAAGCAGACATTCCTGTTGCAAAGAA  
 AACTGAAAAAAAATAAATACAAGGCCCCCTTCAGATGA

>YAR002W 0.71 Cold

ATGCATCGTAAATCATTGAGGAGGGCTAGCGCTACTGTGCCCTCCGCTCCCTATCGAAAGCA  
 GATTATTAGCAATGCACACAATAAACCAAGCCTTTTCTCTAAAATTAACCTTTCTTTACCC  
 AAAAAGATTAGCCAGAGTGAGTCCAAGGAATAATGTTGCTAATAAACAACCACGCAATGAG  
 TCTTTTAACAGAAGAATCTCAAGTATGCCTGGAGGTTATTTCCATTCTGAGATATCCCCAGA  
 TTCTACTGTAAACCGTTCCGTAGTTGTTTCTGCAGTGGGTGAAGCCAGAAACGACATTGAGA  
 AATAAGAAGAGGAGTATGATGAAACACATGAAACTAACATCTCCAATGCAAAGCTTGCAAAC  
 TTTTTTAGTAAAAAAGGTAATGAGCCTTTATCAGAAATTGAAATAGAGGGTGTGATGTCATT  
 GTTACAAAAATCAAGCAAATCCATGATAACTTCGGAAGGAGAACAAAAATCAGCCGAAGGTA  
 ATAATATCGACCAGTCGCTTATCTTGAAGGAGTCAGGAAGTACACCAATCAGCATATCTAAT  
 GCGCCGACCTTCAACCCAAAATATGATACTTCAAATGCGTCAATGAATACGACTTTGGGAAG  
 CATTGGTTCAAGAAAATACAGTTTCAATTATTCTAGCCTGCCCTCACCATACAAAACAACCG  
 TTTATAGATATAGTGCAGCGAAAAAGATCCCCGATACATACACAGCCAACACATCTGCTCAA  
 AGTATAGCATCTGCTAAATCGGTAAGAAGTGGTGTTCAAAAGTCAGCTCCTAGTAAGAAAAT  
 AAGTAATACAGCTGCGGCATTGGTCTCACTATTAGATGAAAATGACAGTAAGAAGAATAATG  
 CAGCTTCAGAACTTGCTAATCCATACTCCTCATATGTAAGCCAAATACGCAAACATAAGAGA  
 GTTCTCCAAATGCTGCACCAAGGCAAGAGATCAGTGAAGAAGAACTACTGTTAAGCCATT  
 ATTTCAAACCGTTCCTGAACAAGGCGAAGAACCAATGAAACAACCTGAACGCCACCAAAAATTT  
 CACCATCTGCGCCAAGCAAAGATTCTTTTACTAAATACAAACCTGCAAGTCCCTCATCCTTA  
 CGCTCAAATGTCGTCTAGCTGAAACCTCACCTGAAAAGAAGGATGGTGGAGATAAACCTCC  
 ATCCTCTGCTTTTAACCTTCTCGTTTAATACTTCAAGAAACGTTGAACCTACTGAGAATGCTT  
 ATAAGAGCGAGAACGCACCATCTGCATCATCAAAGGAATCAATTTTACCAACCTACAGGCG  
 AAGCCGTTAGTTGGAAGCCAAAAACCGAACTTACAAAGGCGATTCTACTCCCGTCCAACC  
 AGATCTTTTCGGTTACTCCTCAAAAAAGTTTCATCGAAAGGCTTTGTTTTTAATAGTGTTCAAA  
 AGAAATCACGGTCCAATCTTTCACAAGAAAACGATAATGAAGGTAACATATCAGCGCCTCA  
 ATTGATAACGACTTTTTCAGAGGAAAAGGCGGAAGAGTTTGATTTCAATGTTCCCGTGGTGT  
 TAAGCAGCTAGGAAATGGCTTGGTTGATGAAAATAAAGTTGAGGCTTTCAAGTCCCTATATA  
 CCTTTTGA

>YJR108W 0.76 Cold

ATGCTTGGAGGACTCTATCTTGACCGTAGATGGAAGCTTTAAAATTTTCATCCCTTGGGA  
 AATATTCCTCACGTGGAATTTTGGAGCGCTGCATGGCTAAATTCTACCGAATCCAATACGT  
 ATATCCACTACTCAACATGTTGGGGCACAAGTGATTACACACTTAATATCTCTGTCATAGAA  
 GCTACTACAGAGAAATTGGTTGACACTAGATTATTAACAACACTCGAGAATGCAACCGCTTG  
 GATTAACCTCAAATCTATTGATGAAGACGAAGATGATATGCCTCATGCCACTAACGTAGCAG  
 ACCGGCTTGATGGGTTATCCCTTAGCAAGCGCGTATATAGCATCTGTCACTACGAATTTAG

>YOR115C 0.77 Cold

ATGTCCTTACACATAGTAATAATGTAGGACATCCCCAATCTTCTCCACAAGGTCCACTAAC  
 GGAACAACAAAGAGCACAACAGCAATATCAAATTTTTGAGAATTCATTACCAAAAGTAAGTC  
 AATCTGTGTATCAGATGCTGTTGAACGAGATGGTTCCTCTAGCTATGGGCATTGAGAGGCAA  
 ATATCAGGCGATGTTATCAGTCTGATAGCAATGTAACCTCCGAAAATGGTAACATCAACAA  
 TATGATAAAGAGACTGAAGATAGAGGAACATCATAACAGTAGATATCATAACGTTCTCATACT  
 TGATACATGAGCTGTATAAGGCGGATGAAGAGGAAAAAGAAAAGGTTTTAGCAAGACTGAGG  
 AATATTGGGTTTTCAAATCGGATTGAAGCTGTCAGAGTTATTGATATTTCTAACAACCCAAA  
 TTTAAAATTCAGGAAATGGACCTTCTATTAATAATGAAGTTCAATTTGTAGGGATGTCTGGA  
 AACAAATATTTGGTAAACAGATCGATAATTTAAAACAAACCCACAGAGGAACCTTTTACCTT

CTTGATTATGACTATCGACCTATTCAATCATTTTCTTTGGAGGAAGATGCAAAAAACGAGGA  
 GTTAAAAATGATAGAACCGTTTTTGGAGATACCTGTGGGAATTATTAGAGGCGTGTGTCTT  
 CCTTAGGTTATTTCATCTGAAGAGGTCATTTGCTTGGCGTCTTTTATCGACAGGCCAACAGAT  
 AGGCCTAAAACAGTTTTTCCCAAGGGAGTTAGCTTCCATGTTCAAGTCACAATGCCGCAGTA  
 A

>YBR295W 0.82 Cold

ATGAAGCCGAAAACTCTTCTCCGGTTTAGGTACCAGCGATGGCGAGTATGGAGTGGTAAA  
 TAGCGAGAACATATCAATAGATGCTATGCAAGATAATAGAGGCGAGTGTTCATCGTAGATCCA  
 TAGAAATGCATGCTAATGACAATCTGGGATTGGTCTCCAGCGAGACTGTACCAATCGGCC  
 AAAATTACTCCTCAGGAATGTTTGAGTGAGACTGAGCAGATATGCCATCATGGCGAGAATAG  
 GACTAAGGCTGGGTAGATGTAGACGATGCTGAAACCGGTGGTGATCACACCAATGAATCCC  
 GTGTAGATGAATGTTGTGCTGAGAAAGTGAACGACACTGAGACTGGCTTGGATGTGGACAGC  
 TGTTCGGCGATGCTCAAACAGGTGGTGACCACCAATGAATCCTGTGTGATGGATGCTG  
 CGTTAGAGATTCTTCAGTGATGGTCGAGGAAGTTACAGGCAGCTGCGAAGCTGTATCTTCTA  
 AAGAACAATTGCTGACCAGCTTGAAGTTGTTCCAAGCAAATCTGAAGGTCTGCAATCTATT  
 CATGATATTAGAGAGACAACCTCGCTGCAATACCAATTCCAACCAACACACAGGGAAAGGGTAG  
 GCTTTCATCGAATCAAGTGACTCTACACTCAAGAAAAGAAGTTGTAAAGTTAGCAGACAGA  
 AAAATTGAGGTTTCCAGTAAGCCTGAGTGCTGCAACATTTTCATGTGTTGAGCGGATTGCATCT  
 CGTAGCTGTGAAAAGAGGACTTTTAAAGGTAGCACCATGTTGGAATTTCTGGGAGTAGCTC  
 TACCGACAGTTTAAAGCGAGAAGTTCTTCAGCGAACAGTACTCTAGAATGTACAATCGTTACT  
 CCTCAATTTTGA AAAATTTAGGTTGTATCTGTAAC TATTTGCGTACTTTGGGAAAAGAATCT  
 TGTGTCTCCCAAAGGTGCGTTTTTGTAGCGGGAGGGTGCTTCTAAAAAGACAAAATACTC  
 CTACCGCAACAGTTCGGATGTTTAAACAAAAGAAAAGACCCATGGAGACAAAGAAAGGTTGA  
 GCAATGACAATGGCCATGCTGATTTTTGTTTCTTAAAGTTGTTGCACTAAAATGAAGGAT  
 TGTGCTGTTACCTCAACTATTTCTGGAACCTCTTCGAGTGAAATTTCAAGAATCGTATCAAT  
 GGAACCAATTGAAAATCATCTTAATCTTGAGGCAGGATCTACCGGTACCGAGCACATTGTTT  
 TTAGTGTTTTCAGGAATGTCCTGTACTGGTTGTGAATCAAACTTAAGAAATCATTTGGCGG  
 CTCAAATGTGTTACGGTTTTGAAGACCAGTTAATATTATCGCAAGCTGAATTTAATCTGGA  
 TCTTGCTCAGGGATCTGTCAAGGATGTTATCAAGCACTTGAGCAAACTACTGAATTCAGT  
 ACGAACAGATTTCAAATCATGTTCAACTATAGATGTTGTTGTTCTTATGCAGCAAAAAGAT  
 TTTATTAATGAGGAATGGCCACAAGGTGTCACAGAGCTGAAAATTGTTGAGAGAAATATCAT  
 TCGTATTTACTTTGACCCAAAGGTTATAGGTGCCAGAGATCTTGTCAATGAAGGATGGAGCG  
 TGCCGTGTTAGTATTGCTCCATTCAGTTGTCATCCAACCATTGAAGTGGGAAGGAAGCATTTA  
 GTTCGTGTAGGCTGCACGACCGTTTTATCCATAATATTGACGATCCCGATTTCTCGTGATGGC  
 TTGGGCTCCACAGCTTCGTGAAAAAATTTCCACTATCTCCGCGTCAATGGTGCTAGCAACTA  
 TTATTTCAATTTGTTATTGTCAGGACCGTTTTACTTAAATGCCTTGAAGAGTTTGATATTTTCC  
 AGGCTCATTGAAATGGATCTACTAATAGTTTTAAGCACTAGCGCTGCCTACATATTTTCGAT  
 TGTATCATTTGGATATTTTCGTTGTTGGACGCCCGTTATCTACGGAGCAGTTTTTTGAAACCA  
 GCTCTTTGCTTGTAACTCTCATGTTGTTGGTTCGCTTTGTGAGTGAAGTACTAGCTAGACATAGG  
 GCTGTAAAGTCAATATCAGTACGTTTCCCTTACAGGCCTCTTCTGCTATTCTGGTGGATAAAAC  
 TGGTAAAGAGACGGAAATTAATATTAGACTTCTCCAATATGGCGATATTTTAAAGGTTTAC  
 CTGATTCAGAATCCCAACTGATGGAACAGTCATTTCTGGGTCTTCTGAAGTCGACGAAGCG  
 TTAATCACAGGTGAATCTATGCCAGTCCCGAAAAAGTGTCAATCAATTGTTGTTGCAGGATC  
 GGTGAATGGCACTGGTACTTTGTTTGTGAAGCTGAGCAAGCTTCCAGGGAACAATACTATTA  
 GTACCATAGCCACGATGGTTGATGAAGCAAAATTAAGCAAGCAAGATCCAAAATATCGCT  
 GATAAAATTGCAAGTTATTTTCGTGCCAACTATCATTGGAATCACTGTGCTCACTTTTGCGT  
 TTGGATAGCGGTTGGAATCCGTGTGGAAAAGCAATCCCGCTCCGATGCCGTAATTCAGGCCA  
 TTATATATGCCATTACGGTACTTATCGTTTTCGTGTCCCTGCGTGATTGGACTTGCCGTTCCCT  
 ATCGTATTTGTTATTGCAAGTGGCGTCGCTGCGAAAAGAGGGGTAATCTTCAAATCAGCAGA  
 GAGTATAGAAGTTGCTCACAACTTCGCATGTTGTCTTCGATAAAAACGGGTACCCTAACTG  
 AAGGAAAACCTTACTGTAGTACATGAACTGTTAGGGGTGATCGTCATAATTTCTCAATCTTTG  
 TTGCTTGGATTAACGAAGGAATAAAACACCCAGTTTCCATGGCAATAGCATCCTATCTCAA  
 AGAAAAGGTGTTTCTGCTCAAAATGTTTCTAATACAAAAGCTGTGACTGGTAAGCGGGTAG  
 AAGGAACATCATACTCTGGTTGAAGTTACAAGGAGGGAACGTGTCGTTGGCTTGGTCATAAC  
 AATGATCCTGACGTTTCGAAAAGCCCTTGAACAAGGATATTCGTATTCTGTTTTAGTGTTAA  
 TGGTTCAGTCACTGCAGTTTATGCATTAGAGGACTCTTACGGGCAGATGCTGTCTCCACTA

TTAACTTGTTACGCCAAAGAGGGATTTCACTACACATTTTATCAGGGGATGACGATGGAGCC  
 GTTCGTTCTATGGCAGCCCGTCTTGGAAATTGAAAGCTCCAATATTCGTTCTCACGCAACGCC  
 TGCAGAAAAGAGTGAATATATTAAGGATATTGTCGAAGGAAGAAATTGCGATAGTTCTTCGC  
 AGTCAAAAAGACCGGTTGTTGTTTTTTGCGGTGACGGAACAAACGACGCAATTGGTTGACT  
 CAAGCAACGATTGGAGTTCATATCAATGAGGGAAGTGAGGTTGCCAAGCTAGCTGCTGATGT  
 AGTTATGTTAAAGCCAAAGCTCAACAATATTTGACTATGATAACTGTAAGTCAAAAGGCCA  
 TGTTTAGGGTCAAATTGAATTTCTTATGGAGTTTTACTTACAACCTATTTGCTATCCTTTTG  
 GCGGCTGGTGCCTTTGTGACTTTCATATTCACCAGAGTATGCGGGTTTAGGGGAACTAGT  
 TAGTATCCTCCCTGTAATTTTTGTAGCTATACTTCTGCGTTATGCAAAGATTTAG

>YMR226C 0.79 Cold

ATGTCCCAAGGTAGAAAAGCTGCAGAAAAGATTGGCTAAGAAGACTGTCTCATTACAGGTGC  
 ATCTGCTGGTATTGGTAAGGCGACCGCATTAGAGTACTTGGAGGCATCCAATGGTGATATGA  
 AACTGATCTTGGCTGCTAGAAGATTAGAAAAGCTCGAGGAATTGAAGAAGACCATTGATCAA  
 GAGTTTCCAAACGCAAAGTTCATGTGGCCAGCTGGATATCACTCAAGCAGAAAAAATCAA  
 GCCCTTCATTGAAAACCTTGCCACAAGAGTTCAGGATATTGACATTCTGGTGAACAATGCCG  
 GAAAGGCTCTTGGCAGTGACCGTGTGGGCCAGATCGCAACGGAGGATATCCAGGACGTGTTT  
 GACACCAACGTCACGGCTTTAATCAATATCACACAAGCTGTACTGCCCATATTTCCAAGCCAA  
 GAATTCAGGAGATATTGTAATTTGGGTTCAATCGCTGGCAGAGACGCATACCCAACAGGTT  
 CTATCTATTGTGCCCTCTAAGTTTGGCGTGGGGCGTTCACTGATAGTTTGAGAAAGGAGCTC  
 ATCAACACTAAAAATTAGAGTCATTTCTAATTGCACCAGGGCTAGTCGAGACTGAATTTTCACT  
 AGTTAGATACAGAGGTAACGAGGAACAAGCCAAGAATGTTTACAAGGATACTACCCCATTTGA  
 TGGCTGATGACGTGGCTGATCTGATCGTCTATGCAACTTCCAGAAAACAAAATACTGTAATT  
 GCAGACACTTTAATCTTTCCAACAAACCAAGCGTCACCTCATCATATCTTCCGTGGATAA

>YJL221C 0.79 Cold

ATGACTATTTCTTCTGCACATCCAGAAACAGAACC CAAGTGGTGAAAGAGGCCACAATTTA  
 TCAAATTTATCCCGCAAGTTTCAAAGACTCCAACAACGATGGTTGGGGTGATATGAAGGGTA  
 TTGCCCTCAAAGTTGGAGTACATCAAAGAGCTTGGTACCGATGCCATTTGGATCTCGCCATTT  
 TACGACTCGCCACAAGATGATATGGGTTACGATATTGCCAACTACGAAAAGGTCTGGCCAAC  
 CTACGGTACGAACGAGGACTGCTTTGCCCTTGATCGAAAAGACACATAAAGCTTGGTATGAAAT  
 TTATCACCGACTTAGTCATCAACCATTGCTCCAGCGAACATGAATGGTTCAAAGAGAGCAGA  
 TCCTCAAACCAATCCAAAACGTGACTGGTTCTTCTGGAGACCTCCTAAGGGTTATGACGC  
 CGAAGGCAAGCCAATTCCTCAAACAATTGGAGGTCTTACTTCGGTGGTTCTGCATGGACGT  
 TCGATGAAAAGACACAAGAGTTTTACTTGCCTTTGTTTTGCTCCACCCAACCTGATCTAAC  
 TGGGAGAACGAAGACTGCAGAAAAGGCAATCTACGAAAGTGCCGTTGGATACTGGTTAGACCA  
 TGGTGTAGACGGCTTTAGAATTGATGTGGGAAGCTTGTACTCCAAGGTTGCTGGTCTACCAG  
 ACGCTCCTGTGATTGACGAAAACCTCAAAGTGGAACCTCAGTGATCCTTTCACAATGAACGGA  
 CCACGTATCCATGAGTTTTCATCAAGAAATGAACAAGTTCATCAGAAACAGAGTGAAGGATGG  
 CAGAGAAATTATGACAGTTGGTGAATGCGACATGCTACTGATGAGACCAAGAGGTTGTATA  
 CAAGTGCCTCAAGACACGAACTTAGTGAGTTATTCAACTTTTCCACACTGATGTCTGGGACT  
 TCGCCCAAGTTCCGTCAAATTTGATACCATATGAACTAAAGGATTGGAAGGTTGCCCTTGC  
 TGAATTTTTCAGATACGTTAACGGAACCTGATGTTGGTCAACAATTTATCTGAAAAATCACG  
 ACCAACCTCGTTCAATTACCAGATTTGGTGACGATTCTCCAAAAACCGTGTATTCTTCTGGT  
 AAGTTGTTGTCTGTGTTGTTGGTGTCACTGAGCGGTACTCTATATGTGTACCAAGGACAGGA  
 ACTGGGTGAAATCAATTTCAAGAACTGGCCTATCGAAAAATACGAGGATGTCGAAGTTAGAA  
 ATAACATATGATGCGATCAAGGAAGAGCATGGAGAAAACCTCGAAGGAGATGAAGAGGTTTTTG  
 GAAGCAATTGCCCTTATTTCCAGAGACCATGCTAGAACACCTATGCAATGGTCTCGTGAGGA  
 GCCAAATGCTGGTTTTTCTGGTCCATGCTAAACCATGGTTTTACTTGAACGAGTCTTTCA  
 GGGAAAGGAATTAACGCTGAAGACGAATCCAAGGACCCCAACTCGGTTTTGAACTTCTGGAAG  
 GAGGCCTTGAGATTTAGAAAAGGCACACAAGGATATTACTGTGTATGGATATGATTTTGAGTT  
 TATTGATTTGGACAATAAGAACTGTTTCAAGCTTCCAAAAGAAATACGACAACAAAACATTTGT  
 TTGCTGCTTTGAACTTTCAGCTCTGATTTCGATCGACTTTCACGATTCCAAACAATAGCTCATCG  
 TTTAAGTTGGAATTCGGAAACTACCCAAGAAGTGAAGTTGATGCGTCTTCCAGAACATTTGAA  
 GCCATGGGAGGGCAGAATTTACATATCTGAATGA

>YBL053W 0.8 Cold



ATGTTACATGTATATGCTTATATCCAATATATACCCATCGCCGCTTATTCTTCGTCATCCTC  
TATTAGAGTTATTTTTCTTCTTTTTCTGACTCTCTCCTTCCTTATGTGGCTTTCTATATCGT  
TTTCATCCTGCTCTTGTCTTTTTCTTCCATCCTCATCATCACTGTCTTCTTCATAT  
GTGTCTTCCCTCCTCATCATTTTTCTTCTGATATTTGCTCATCCTCAATGTCATCATCAAGGGT  
AAAGTCTTCGTCTTCGTCTTCATCTTCTTTGGCGTTTTACCTACATATAATTCAGTATCTA  
CATCGTTTTCTACTTCATCCTGCTCTAAACTTGATATTCAGTATCGTTTTCTCCTAGCTGCA  
TGA

>YOR264W 0.71 Cold

ATGCCAAGAAAGTTTTTGGGCAATAAAATTGAAAAGAATGTTGATGCAGTCAGACCATCTTC  
GCTAACATTAACAGCTGATGACTTGAAGTATATTCCACCGATACCACAAGATTTTGAAGATG  
AAGATGATAAGGTTTTACGTACCAGCAACGGTGGTAACAGGTTGTCTAAAAGATTTGGGGGT  
ACACTGAACTGAAGAAACGGTTAGAGTCTGTTCCAGAATTGTTCTTACATGATTTCAAGAA  
GAGGCCACGCTCCCAACTTGAGGTGATTAGAGAGAAAAAATTTACTGACATGCAAGTCCCA  
AGGGACCAGTTTGTCTCCTCAAAGCACGATTCTACCATTACGAGAAAGAAAAGGTAATAATCA  
CTACCAATTCAAAAGAAAAAGTTTACGTAGGCCGACGCTGTCAAAGCCTGCAGTAGTACAATC  
TTTAGGGCATAAGACACATTCGGATCATATTTATTGATAAAAGTGTGTTGTCTCTCGCCCGGCC  
CAATTGTAATGCCTGTAAAAGCCCTTACTCCTATTAATCCGGTCTCCCTAATGCAACACAG  
ACACAAGATTGCTGTAGAAAAATAAGTATGGCAAAAGCGGTAGTGAAATATTGTTTGACGA  
AATTCATCAGCCTATGAAAACGTTTTCTACAAGCGATTCTACTGCCCTAAATTCAGAAATTG  
ACAGAATTATCGATATATGCGCTTCAAACAAATAGCTAAAAAAAATGAGGCATTTTCAGGTA  
CCATATGTCGTCTGCCCTGACGACACAGAGACTTTGTTTTCGTCAACAACACCAAAAGTTGAA  
ACCTGTCAATTCTAACACATTAACGATGTCATTTCTAGCCAGAATACACCACGTCTGGAT  
GCAGTACATACTCTGACCAATCGAATTCAGATGAGGAATTGTCCGAAGTAGAAAGTATAGTA  
TGGAACACGAATAAGAGGACAATGAGATCATCCATTGTGTCTGAAAGCACTAGTGAGGAAGG  
CTATTGCACTGCTGCGGAGACTTTGCCCTCAACAGTATCAGTGGAAGATCTGGATATACATA  
ACAAGCTTCCAAAAGTTGCACAAACATCATCGTGCAATACGCTTTTTGAATAAACTCTCTATA  
AGAAAATTAAAAAAAGTAATTCATCGATCCGCCTAAAATAATGCATGTCATGACTTTTTGACGA  
TGACAGTGATGATGGAGATGACAACGATGACGAGGATAGGGCTTTGAATATTTCTTCAAAAAA  
AAATTGACTGCATTTGAAATAGCAAGTTGCAGCAGTAGCATTACAGCGAATAA

>YIL008W 0.8Cold

ATGGTAAACGTGAAAGTGGAGTTTCTAGGTGGACTTGATGCTATTTTTTGAAAACAAAGAGT  
ACATAAAATTAAGATGGACAAAGAAGATCCTGTACAGTGGGCGATTTGATTGACCACATTG  
TATCTACTATGATCAATAACCCTAATGACGTTAGTATCTTCATCGAAGATGATTCTATAAGA  
CCCGGTATCATCACATTAATCAACGACACCGATTGGGAGCTCGAAGGCGAAAAAGACTACAT  
ATTGGAAGACGGTGACATCATCTTTTTACTTCAACATTACATGGTGGTTAA

>YJL001W 0.72 Cold

ATGAATGGAATTCAAGTGGACATCAATCGTTTTGAAAAGGGCGAAGTCAGTTTAGGTACCTC  
AATTATGGCCGTGACATTTAAGGATGGTGTGATACTAGGTGCTGATTCACGTACCACCCTG  
GTGCGTACATAGCTAACCCTGTGACAGATAAATTAACGAGAGTACATGACAAAATTTGGTGT  
TGTAGGTCCGGTCTGACGACAGACACGACGAGCGATTGCCGACATTGTTTCAGTACCATTGGA  
ATTATATACTTCTCAATATGGTACCCCTCCACAGAGACTGCTGCCCTCGGTGTTCAAAGAAT  
TATGTTACGAAAATAAAGATAACCTTACTGCTGGTATAAATGTGGCTGGTTATGATGACAAA  
AACAAAGGGGAAGTATATACTATTCCATTGGGTGGCTCCGTCCATAAGCTGCCTTATGCGAT  
AGCAGGATCTGGCTCTACTTTCATATATGGGTATTGTGATAAAAACCTTTAGAGAAAATATGT  
CAAAGGAAGAAACCGTAGATTTCATAAAGCATTCGCTATCGCAAGCCATTAAATGGGACGGA  
TCTTCCGGTGGTGTATAAGAATGGTTGTTTTGACAGCTGCTGGTGTGGAACGTTTGATATT  
CTACCCTGATGAATATGAACAACATAA

>YKL174C 0.76 Cold

ATGCCAGAGTATACGCTACTGGCTGATAATATAAGGGAGAATATCGTTCATTTTCGATCCGAA  
TGGTTTGTGATAAATTGCACACCATTGTTTCATGAAGATGACAGTCAAGAGAACGAGGAGG  
CCGAGCATTTCATTTATGATCAGGTGTTGGATAAATCGTTATTGTCAAGAGGTTCTATTGTC  
GGTCTCGGTTTAGGACTAATGAGTCCCGTTTTAGGAATGTGCACTAGTATGGCCATTGGGCT  
AATTAATGGTGGTCCGTTAACTATAATGCTAGGTTTTTAATCAGTGGAGTGTGTATATGGT

TTTCGTCGCTTTCTCTTGGTGAGATTGTTTCAAATTTCCGATGGAACGTCATGTTGGGAGT  
 GCCATGTTGGCCCCGAGAAATTGAAATTAGTATGTTTCGTGGTACACTGGCTGGTTAATGCT  
 CATAGGGAATTGGACTATGAGTACCAGTATTACTTTTTGCAGGCGCTCAACTTACCATTTCTT  
 TGATTCTGATGACGAACCTCAACCTAATATCCGAGGCACACTTGATTTTTTACACAGTCATT  
 GTATTTTACTTAGTTGTGACTGTTGTAGGCCTCGTGAATTTGAAATTTGCAAGATTTATGGA  
 AACATAAACAAAAGTCTGTGTTTATTGGATCATATATGCCATTATATTTATTGATATTCCTC  
 TACTAGTATTCACAAAGGTAAATTTTCGATCTTTGAAGTACGCGCTATTTCACTTTGATAAT  
 AATCTATCAGGGTATAAAAGCGCATTTCTTTCCTTCATCATTTGGATTCCAACAGTCTAATTT  
 CACGTTACAAGGTTTCAGTATGTTACCTGCTTTAGCTGACGAAGTCAAAGTTCCTGAGAAGG  
 ATATTCACGTTGGTATGTGCAATGCGGTATTGTTATCCGCGTTCTCTGGAGTCATTTTTCTT  
 ATACCAATAATGTTAATCCTGCCAGATAATGATTTGCTTTTTTACCAATCATAAGGTTCTACC  
 AATAGTGAACATTTTTACAAAATCGACTGATTCGGTGGTCTTGTCTTTTTTTTTTAGTGCTCC  
 TAATTTTAGGAACTTACTGTTTTCCGGAATTGGCTCGATTACTACATCTTCTCGTGCGGTA  
 TATAGTTTTAGTCGTGACCAGGCTATACCATACTACGATAAATGGACCTACGTCGAACCGGA  
 TTCTCAGTCAAAGTCCCCAAGAATTCTGTTGTATTGAGTATGATAATATCATACTTTTTAG  
 GTCTGCTAGCTTTGATTTCAACGGCCGCATTTAATGCTTTTTATAGGCGCTGCAGTGCTCTGT  
 CTTTGTCTGCGACTTTTCATTCGGTTAGTCTTGGTGCTGTTTACGAGAAGAAGAGCTATCCG  
 AAGCGCGCCAGTAAAAATCAGGTATAAGTTTGGTTGGTTCATCAACATTGTTTTCTATTGTGT  
 GGCTCTTGTATCTATGGTTTTCTGTTTGCTACCAACGCAAGTGCCTGTAACTTTTCAAACA  
 ATGAATTATGCTTTAATGGTGTACGTATTCTGCATTTTAGTTATCACTGGTCTTTATTTCAA  
 ATGGGGGAAGTATAATTTTAGATTACCCTTGGCAGATGACATCAAGGCTCCAATTTCCAGTG  
 ATGCGGAAGAACTGTTTTTGAAGTAGAGGATAGCAATGTTGAACATACTCTAAACTCGGGA  
 ACCACAGTGAAGAGTCTGTAGAAAATAATTTCTGAAGAAAGTTTCATCAAGGTGCATCCTAA  
 AAGTAGTACAGAAAATCCCTTTGAGGAAAATGAGGAAAACGTGATAACCGATTATGGTGATG  
 AGCACCATACAGCAGAACAAGAATTTGATCTTGCCGATGATCGTAGATATGATATATGA

>YPL269W 0.81 Cold

ATGGATAATGATGGACCCAGATCTATGACCATTGGGGATGACTTCCAAGAGAACTTTTGTGA  
 ACGTTTAGAAAAGAAATTCACAATACATTACATTCAATAAACGATTGCAACTCATTGAATGAGA  
 GTACCACAAGTATATCAGAGACATTGTTAGTTCAATTTTTATGATGATTTGGAGAACGTTGCC  
 TCGGTAATTTCCGACTTAGTCAACAAGAAAAGACTGGGAAAAGACGATATTTTTGTTGTTTAT  
 GGACTGGTTATTATTGAAAAAATATATGCTATATCAATTTATTAGTGACGTTTCATAATATTG  
 AGGAAGTTTTGCTCATTGTTGGATTTACTAGAGGATGAATTTCTCGAAGGACGATCAGGAT  
 AGCGACAAATACAATCGATTTAGCCCGATGTTTACGTCATAGAAGAATCTACACAAATTA  
 GACTCAGTTGGAGCCATGGCTTACTAAGGAATTATTGGATACGTCATTGGAATTTA  
 ACGAAATTTCAAAGGATCATATGGATACATTACATAAAAATCATTAAATAGCAATATATCGTAT  
 TGTCTGGAAATTCAGGAAGAAAGGTTTCGCGTCCCCGATACGGCATACTCCATCATTTACCCT  
 AGAACAACTAGTCAAGTTATTAGGAACGCATACGGAGACAACCTGAGCCAAAGGTACCAAAT  
 TTTCTCCGGCAGAAGATATTTTATCAAGAAAGTTCTTGAACCTAAAAAAAATATCCCTCCA  
 ATTGAAAAAGTTTGACTGATATCCTACCTCAAAGAATTGTGCAATTTGGGCACCGGAATAT  
 AACAAACATAACTACTTTGCAACAATCTTGCAAAAAAAATACGAGCTGATAATGAAAGATT  
 ATAGATTTATGAATTCAGAGTTTAGGGAATTGAAAGTCGAACTAATCGACAAACGTTGGAAT  
 ATACTCTTTATTAATTTAAATCATGAACATTATACATTTCTTGATGAGATAGAAAGGTTGCA  
 GTCGAAATTTACTGACAACAAAGTATACCAAAGATATCACTATAAGGCTCGAGAGGCAATTTGG  
 AGAGAAAATCAAAAACCTGTTTCTAAGACATTCAATATTATTTACAGAGCATTGGAATTTCTCA  
 CTTTTGGACGCTGGCGTCGCATCGAAGACAAATGAATTAGCTCAAAGATGGCTGAATATCAA  
 GCCTACAGCGGATAAAAATTTCTAATCAAATCCTCCGCTTCAAACAAAATAGCTACTAGCAAGA  
 AGAAGATTTCAAACCGAAATCATTAGGCTTTGGGCGACCGAATAGTGTATTGGAACCTATA  
 ACCCAGGATTTCCAGGAGAGAGTCGCCATTAATGAAGGTGACAGTAATAAAACACCGGAAAA  
 TTCAACTACAGTGGCTTTGAAAGGTAAAAAGCTTGGTAAAGCGTTACTGCAGAAGATGAATA  
 TTAAACCTGCAACAAGCCCAAATTCATCAAATGCGATTAATCCATTTTTTGATCCGGAGTCG  
 CCAAACAAGGAAAACCTGATACTAAGTAGTGTTCCTCCCTTACCTTATGACGAAACCGATGA  
 AACCACCCTCCGTGTTTCTCGTGGGAAAAATGAAAAGTCAACAGACTCCTTACATTACATCTC  
 GGCATGAAAAATAAGTACAGATTACAGAAAATCCTTTGATGGCAAAGAATAAGTCTGTGCTT  
 GACATCGAAAAAGATAAATGGAATCATTACCGGTCCTTGCCCTCTAGGATCCCTATATACAA  
 GGATAAAGTGGTGAAGTCAACCGTAGAAAACACACCGATAGCAAAGGTTTTCCAGACTCCGC  
 CAACAAAATCACGACACCTAATAGTCAAGTTGGGTCCCTTCGACAAGAAGAAGAACCGGA

TTGAGGCCTCCCACCCCCTTATCACAGTTACTTTACCAAGAGAAGGGCGTTTAGATAAAAC  
CCCAACTTATTGA

>YOR017W 0.75 Cold

ATGGGGTTCTACAACGTAGATTCCTGTCCAGACGTCTATCTGTTGAGCCTTGCAGAATAGG  
TAGCGCCGCTAAAAGCTATCAACAGCGATCGATTTATCACTTTGGCGCTGCTCTCACAATG  
CCCCTAGTGGAAGAGAAACACCAGACAAGCTACGTTCTGACCTGCATAGTGCTTTAGAGATG  
GTCGATGAAATATATGACACAAATTCGACTGTAGAGGACATTTGAAACAAGGAAAAGGGAGG  
TCGACAAAAATATACGGAAGAAATGGACAAGGCGATTAATCTACTGAAAACAAATATAAAGA  
AGGAGTATAGACATGATAAGTATTTGGAGCGGACAAAGGTAGGAACGTATCCTGGTAGAAGA  
ACATATCCTGGTAGGAGAACATATCCCGCTAGGAGAACATATCCCGCTAGCAGAACATATTC  
AGATAGCAATTCATACACTTTTTCGGATAAAATGTCCAGAAGATTAGGCACGCATTAGTACGTT  
ACAATCAAGATGGTGTTCAAAAACACAACCAAAAGCCTCCTAGGATTGGTCATGGATTAACG  
AGAGTGTATACCAACCGTTGTTCGCTACAAAAATTGAGAGATAATAGGAGCAGAATGTATAA  
TTTTGACCCTGCAGTGGAAAAATTAATCCAGAGTATTTGGAAAAGAAAAGTAAAAAGATG  
TGAACACAGACTCCTCTGGAGAAGGACAAAGCAAGCCAATATTCATCACACCCACAAAAGAT  
GAATCTCTGTTAAAGGTTGCCAAAGAACATAGAAAAAAGTACATATCTTCATCAAGTCCAT  
GACATCAGTACTTTCTCAGTTGCACTATTTATTTATCCAATTTTCAGAAGATTGAATATCATTG  
ATTCCTCGATATCGAAAAATTTTCCTCAAAAAAAGTCAATTTATTCAGAAAGTGCATATTTT  
CCGTCAGCAGTCATTTCTGAGAAAAGAAGAGAAAATGGCATTGTCTATTGATTAGATAGAAG  
TCTGGATAGGGAGATTGTGCTTTCTGTACTAGGTCATTATCTTGAAGACTTTTTAACGGAAA  
AGTCCCTGAAGAAATAGTTCAAAAAGTAAAAATTATCACTATTCTAGTATAGATGAATTCATT  
GTGAGATCTCAATTGGACGCGTACGACCCAAATCTACCTGGAACGGGTGTATTTGATCTGAA  
GACAAGAGCAGTTTCTGCCATAAGATACGATTTATCACATGTAGAGAGTAATAACAACCAAA  
CTGGATATGAGATAGATAAAGTTTATGGGGAATTTGAGTCTTTGGAAAAGAGAATATTTTGAA  
CTAATCAGGTCTGCCCTTCTAAAGTATTTCTTTGCAAGCTAGAATTGGCAAAATGGACGGTAT  
TTTTGTTGCATACCACAATATTTCTAAGATGTTTGGATTCCAATATCTACCTTTGGACGAAT  
TAGATTATATAATCCATTCTTCGTATAACAGCAAATTCGACAGTTTGTAAAGGAGAAGAAT  
GATATCACAAAAGGATATATGGTGAGGAGGACTACATTCTACACTATGACAGGGACGATAG  
GAAAATTGCTTGGTGGCTAATAGGGAATTTAAGATGTCTATGAATCTGTTTCAGTAATA  
TTTTGAAAACACGTTGAGCAGTTACTTAACTCAAGTAATACGAAATGGGAAAAATGCAAAATA  
ATGCTTAAACCGAAGTTGAAGAAAAACGATCCAAAAGTGGCCGCTTCTTTAACGAACCGGT  
GCTAAATATTGTAGCCCTGCCGTTGTACCTGAGTACGAGGATAAATCTTTATTGGTAAAGG  
ATACTTCGAACGAACAATTAACAGAGGAGCTACTAAACCTCCGCTCATATAACGAAAATCTT  
TTGGAGGAACACCTGAATTCCTTAGTTGGATTAAAGTAAATGTCAAGCATTCTATACCA  
TCATCCTAATACTACACATCTACCTGATTTTGTCTTTAAAAAAGAACGATATTTCTCGACCCG  
AATCCCGTAAATATATTTCTGACATGATGAAACGAGACTGGTACAAAGATATACCATCTACA  
CAGACTCCAAACTTTTTCCACGCTTCCGATGTTTCCACTTGGGAGGTGAACTCTACTTTTAC  
AGATATCAATGACAAACAAATTTTACGAAAACATACTTTAAATATTTGGATGTTAAATTA  
ACGCATTGAAAAATCAAGTAATCACACGTCAGGAACCTGATATGTCTAAAAAGGATGAAATT  
ATGAATCGAATCAAATCACTACAAGCCCGCAATGATCACCGCGATAATGGAAGTAACAAAAG  
ATATTTCTAATTTTGGCCCTACCCGACTGCAAACTAAACTGCGCGCATATGCTAAAAAAGGTG  
CCCTTCGAAGAAAACCTATTAGAAAAGGAGTAACAAGTTCATATCTAG

>YJL050W 0.8 Cold

ATGGATTCTACTGATCTGTTTCGATGTTTTTCGAGGAAACACCTGTTGAGCTTCTACAGATAG  
TAATGGAGAAAAAATGCTGATACAAACGTAGGAGATACTCCAGATCATACCCAGGATAAGA  
AGCATGGCCTTGAAGAAGAAAAAGAAGAGCATGAGGAAAAACAACAGTGAAAATAAAAAAATC  
AAATCCAATAAGAGCAAAACGGAAGATAAAAACAAAAAAGTTGTAGTACCAGTGTGGCAGA  
TTCGTTTCGAACAAGAAGCCTCTAGAGAAGTGGATGCATCGAAAGGACTGACAAATTCAGAAA  
CCTTACAAGTTGAGCAAGACGGTAAAGTCAGATTATCGCATCAGGTCCGCCACCAGGTTGCA  
CTACCACCGAACTATGATTATACGCCTATCGCTGAGCATAAGAGGGTAAATGAGGCTCGTAC  
ATATCCATTACATTAGACCCTTTCCAGGACACTGCAATCTCATGTATAGATAGAGGCGAAT  
CTGTGTTGGTTTCTGCGCACACATCGGCTGGTAAAACAGTTGTGGCTGAATATGCCATCGCA  
CAATCTTTAAAAAATAAGCAAAGAGTCATTTATACCTCTCCAATTAAGGCTCTATCAAACCA  
AAAAACAGAGAACTTTTAGCAGAATTTGGAGATGTCCGTTTGGATGACTGGTATATCACGA  
TCAATCCGGATGCAGGCTGTTTGGTTCATGACCACTGAGATTTTGAGAAGTATGTTATATAGA

GGCAGTGAAGTTATGAGAGAAGTTGCCTGGGTCATCTTTGATGAAGTGCATTACATGAGGGA  
TAAAGAAAGAGGTGTTGTGTGGGAAGAAACGATTATTTTACTGCCAGATAAGGTCCGTTACG  
TGTTTTTATCGGCCACCATTCCAAATGCAATGGAGTTTGCTGAATGGATATGCAAAATTCAT  
TCTCAGCCATGTCATATTGTCTACACAAATTTCCGTCCAACCTTTTACAACATTACCTGTT  
TCCAGCCCATGGAGATGGTATTTATCTGGTGGTTGACGAAAAAAGTACCTTCAGAGAGGAAA  
ATTTCCAAAAAGCAATGGCGTCCATAAGTAACCAGATAGGTGATGATCCAAATTCACTGAT  
TCAAGAGGTAAAAAGGGTCAAACCTATAAAGGTGGCTCCGCTAAGGGTGACGCAAAAGGTGA  
CATTTATAAGATAGTAAAAATGATTTGGAAGAAAAAGTACAATCCAGTGATTGTATTTTCGT  
TCAGTAAACGTGATTGTGAAGAATTAGCATTGAAGATGTCTAAATTAGATTTTAATTCTGAT  
GATGAAAAGGAGGCTTTGACGAAGATTTTAAACAATGCCATTGCACTATTACCAGAGACAGA  
CAGAGAGCTACCCCAAATTA AACACATTTTACCATTATTAAGAAGAGGTATCGGTATTCATC  
ATTCCGGTTTTACTGCCCATTTTGAAGGAAGTCATTGAAATCTGTTTTCAAGAGGGATTTTTG  
AAGGTGTTGTTTGCAACAGAAACATTTTCGATTGGATTAAACATGCCTGCTAAAACCTGTTGT  
CTTTACATCGGTCAGAAAGTGGGATGGTCAACAATTCCGCTGGGTTTCAGGTGGAGAAATA  
TACAAATGTCTGGTCGTGCAGGTCGTCTGGTTAGATGATCGTGGTATTGTTATTATGATG  
ATTGATGAAAAAATGGAACCTCAAGTTGCTAAAGGAATGGTTAAGGGCCAAGCAGATAGGCT  
AGACTCGGCTTTTCACTTAGGATATAATATGATTTTGAACCTTAATGAGAGTTGAAGGTATCT  
CTCCGGAGTTTATGTTGGAGCATTTCTTTCTTCCAATTTCAAACGTTATTTTCAGTACCAGTT  
ATGGAAAAGAAACTTGCTGAACTGAAAAAAGACTTTGATGGCATCGAAGTCGAAGATGAAGA  
AAATGTTAAAGAATACCATGAGATTGAGCAGGCTATCAAAGGTTACCGTGAAGATGTTTCGTC  
AAGTTGTCACCCATCCGGCAAACGCCTTAAGTTTCTTACAACCAGGCAGATTAGTTGAAATC  
TCTGTCAATGGTAAGGATAACTATGGCTGGGGTGTGTTGTCGATTTTGTAAAAGAATTAA  
CAAACGCAACCCCAAGTGCTGTCTATACAGACCATGAATCCTATATTGTCAATGTGGTCTGTC  
ATACCATGTATATAGACTCTCCAGTCAACTTGTGAAACCTTTCAACCTTACCTTACCAGAA  
GGGATTCGCCACGGAAGAAGGTGAAAAAAGCATATGTGCTGTTATTCCATAACTTTGGA  
TTCAATCAAGTCGATTGGTAATTTGAGACTATATATGCCCAAAGATATTAGAGCCAGCGGTC  
AAAAAGAACTGTTGGGAAGTCTTTAAGGGAGGTTAATCGGAGGTTCCCGGATGGTATTCCC  
GTGCTGGATCCTGTTAAAAACATGAAGATCGAAGATGAGGACTTTTTTAAAGCTAATGAAGAA  
GATTGACGTTTTTAAACACAAAGTTATCCTCCAATCCCTTAACCAATTCATGAGACTAGAAG  
AACTATATGGTAAATATAGTAGAAAACACGATTTACATGAAGATATGAAACAATTGAAACGC  
AAAATTTCAGAATCACAAGCCGTAATCCAACCTGGACGATCTTCGTCGCCGTAAAAGAGTTTT  
GCGCCGTTTAGGATTTTTGTACTCCTAATGACATTATTGAACTGAAAGGTAGAGTTGCATGTG  
AAATATCTAGTGGTGAATGAACTGTTACTAACAGAATTGATCTTCAATGGTAATTTCAATGAG  
TTGAAACCGGAACAAGCAGCAGCATTATTATCATGCTTTGCATTTCAAGAACGCTGTAAAGA  
AGCGCCTAGATTGAAACCAGAGCTTGGCCGAACCTTTGAAGGCTATGAGAGAAATTGCAGCAA  
AGATCGCTAAGATAATGAAGGATTCTAAAATTTGAAGTTGTAGAAAAGGACTACGTTGAAAGC  
TTCAGACATGAACTAATGGAAGTTGTTTACGAATGGTGTAGAGGAGCTACTTTTTACGCAAAT  
CTGTAATAATGACCGACGTTTACGAAGTTTCGTTGATCAGAATGTTCAAGAGATTAGAGGAAT  
TGGTGAAGGAGCTGGTAGACGTCGCCAATACCATTGGTAACTCTTCACTTAAGGAGAAGATG  
GAAGCTGTCTTGAATTAATTCATAGAGATATCGTATCTGCTGGTCTTTGTATTTATAG

>YDR351W 0.78 Cold

ATGACAGCACGTCGTTTTGATTAATATAGTTCCTAATACGTCCTAAGCTAGACCCTTTAAAGGA  
GGAGACTCAACGCATCTGAAACAAAATCAACCTAAGAAGTTTTCCACAAAGGAGTTGATGC  
TTTCAGAATATACCGAACGCAAAAGTTGCAGCCTTCCGTTGTCTAAATCCCGATCAGGCAGT  
AGTGCATCCAGTAGCACTACAGGTTCGAACGGAAGAATATTGGAACAAGACGCCCTAGCTC  
CAACCTAGATTTCAATTTTCGCTAGCCAAGATGTTGTTAAAAATGTATTAGGTAATAATAATC  
CACACGTACCCACAGCGAAGTGCATTAGGCCAATATCAGATGATTCTATAGGTACATCGAGC  
ACAGAGATATTTCTTTCATCGCACTCAAATACGACATCTGATTCTTTATGTACATCAGATAT  
AAGCTCAGAAGAGGGTGAATAGCAAACAGTAAGATGGAGGATAACTGCTTCTTCAAAGTA  
TGAGAGAAGCTGACCATAGAAGCAATATTACGCCCTTAAAGAAAAGCCGACCGGGATCAATA  
CTACAGAAAACACGTACAGCAAGTAGCGCTGATAAAACAATCTGCTCAATGAGTACCATAAC  
TACATGCATTTCCATCTCGTCAAATTCGGTGTCAACTCCTAAACTCTCCAGGACAGTAGGGC  
TGCTTGATCGAGCAATACAACCAACAGTATAGCCGCATCACAACCTTCAATCATAAGCGAG  
AATGACTCTCCTCTTAAACATCATTGCATGAGTACCGCAACTATCCAAGAACCAAAACTCAT  
GCCGATCACA AAAACGCCGTATGTGCATTCCAATAGTACTTCTGTAATATTACCATATAAAA  
CAACCAACTTACTCCTTCTCAACGTTACCGTTTAAAGAAAAGAGCAAAATGACCAATCTTTG

CGTAAAGCCATAAAAATGAAAGAAAAATTTTATGAAGATCAAGACGTTAACTTGGAACCTTCA  
 AGAGGGCGATGTCGACGGCTCGTTAATTTGGAACATTCCAATGGCATCTTTATCGACCAGTT  
 CTTTTTTAACATTATCTAAGTTTAATAGAAAAGAAATGAGTTTAGATTCAGCGCGGGGGGAT  
 GAAGAGATATTAATACAGGAGAACAATTGCGAAGGCAACAACACTCATCTTCGGCTCTCTG  
 TGTGGACAAAACCTTCCATCAGGTTTCATAGTACTAGAAAACATACATCAAATTCAGTAACA  
 CTTTAAAAGAATCATGTCTGGACTATAAGGAGCTTCCGCCAACATGCATTCCTGGTATATCT  
 CCTGTGTCTGATTCACAGTACATCCAGGATACAATGAAAAATCTCTCCCAAATATACCTGCA  
 TAGTTCCGAAAAATCTCCAAAAGTATTCTTTCTGGTCTGTTCAAGATCTGTACAGAGTTTAC  
 CACTGGAATTTAAAGAAGCCAGTAGTCAGGGAATGGAAGACCTAATGCTAGTTTCAGAGGAC  
 AAATAAAGGCCGTAAGTCATTTCCGTCCGAGTTGGCTCCCGCCCAAGGATTTCAAAGAGAG  
 GAAATTGCAAGATAAACAAATCTACAAAAATATCGACTTAGCATCAATGGAAGAGTTGCAAA  
 AAAATAAAGAACGTGACGAAAAAGCCAAAAAGAATGAGCAGAATAAGGTCAAATTCAGCAT  
 TTTACTGGACCGAGGCATTACTCGTAACTCGTCATTAAGTGAATTAAGAAAATTTATTTGGGA  
 AACACCTTTGATATCTAAAGTACGGCTTCAAATATATAGTCAACTTCTACAAAGTGACAATT  
 GCTTGATAACAAAATGTTTTATTGAATCATTTGAGGAAGTAATGCAGCTACTCAACAAAATG  
 GATTTTCCCAAAGATAAAGAATTTGAAATAAGACAGCTTATTGAACACGATGTACAGGAAAA  
 GGTTTTTTATAAAAATGGAACAGATAAGCAAGTGGTTTTCTGACTTGATGCTATTACTGCAAC  
 TGAAATCTATATCTCAACAAGGTTTGGTTACTGGTGATGAGATGCTATTCTACCATTTTTTA  
 ACTGATCAATCTTTTGGGACTTTGAAGGAAACATGGGAAATGGTCAACTTGATACAGATGAC  
 GTGCTTCAGTGAAATTTGCAAGGAAAAATACGATTCAAGAATATTAATCCCAGAGGAATTG  
 TTGCCCATCTTTTACGAAAAGATGAGTTCAAAAATGAATTCATGGCGGATGTTTGAATAGC  
 AATACATGGTGGAACATATTGCAAAGAATGGACCATAAACTTTTTATGTGGGTAATGGATGT  
 AATTATCGTTCATAATGGCCAAAACCTTTGCAAACCTACCCCGTAAAAATGGAATATTCAAAG  
 ACAAGTATGGGAATACTATAGATCTAAGAAGGTTATTGTAAATTATAAGATTTTTGGTTTCA  
 CTAACAGTTAACGTATTGTTAAACTACCACTTCGGATATGATAATCTGAAACATTTATCAGA  
 TTTGGATGATAAGCATTTTTGTATTCCACTGTATACGGAGGATAGTATCGAAGAGGAAAACC  
 TCAATAATATTTTCACAAAGTGGTGGTTGCCTACTACCGAAAATTACGTTAG

>YBL105C 0.82 Cold

ATGAGTTTTTTCACAATTGGAGCAGAACATTAATAAAGATAGCCGTCGAAGAAAATATTAT  
 TCGGGGAGCTTCTGCCCTCAAGAAAAGACTAGCAATGTTATGGTCATTCAGAAATGTAATA  
 CGAATATTAGAGAGGCACGTCAAATCTTGAGTACTTGGAGGATAGCTTAAAAAATTACGG  
 TTGAAGACCGCTCAACAAAGTCAGGGTGAAAATGGCAGCGAAGATAATGAGCGATTCAATTC  
 GAAGGAATACGGTTTTCTTTCTACCAAATCGCCAAATGAACACATATTTTCTCGTTTTGATT  
 TAGTAAAATATGATTGCCCTTCTTTGGCGCAAAGAATCCAATACATGTTGCAACAATTAGAA  
 TTCAAATTACAGGTGGAAGCAATACCAAGAAGCCAATACTAAATTGACTAAATTGTATCA  
 AATTGACGGTGATCAACGTAGTAGTCTGCGGCAGAAGGGGGTGCTATGGAATCCAAATACA  
 GGATTCAAATGCTTAACAAAGCTTTGAAGAAAATACCAAGCTATTAACGTTGACTTTGATCAA  
 TTTAAACACCAACCCAATGACATAATGGATAATCAACAACCGAAATTCGGAAGAAAACAAC  
 GACTGGCGTTCTAACAATTGGAATAACTGCTGCTAGAGATGTTGACCATATACAATCACCGA  
 TGTTTGCCAGGAAGCCAGAGACTACGTTACTATAAAAAATCGATGATACGATCAAAGCCAGA  
 ACGAAGCCTTCTAGAAATGACAGGTGGAGTGAAGATTTTCAAATTCAGTTGAAAAAGGGAA  
 TGAATCGAGATTACTGTATATGATAAGGTGAACGACTCGCTCATTCCAGTGGCTATAATGT  
 GGTACTGCTTTCCGATATCGCTGAAGAAATTCGTAAGAAGAAAGCCGGACAAACAAATGAA  
 CAACAAGGATGGGTCAACGCTTCAAACATTAATGGTGGTCTTCTCTCGCTAGCGAAGAGGG  
 AAGCACATTGACTTCTACATACTCAAACCTCAGCCATTCAGTCTACTTCAGCAAAGAATGTGC  
 AAGGCCAAAATACATCAACTAGTCAAATCAGTACGAATTCATGGTTTTGCTTTAGAACCATCC  
 GGCAGATTTTGTAACTAGGATTCACAAAGTCTTCTCAAATAGAAAGGAAGCAGTTGAT  
 GGGTGGACTACATCGTCATGGTGCTATTATCAATAGGAAAGAAGAGATATTCGAACAGCATG  
 GCCACCACTTTGTACAAAAATCATTTTACAACATTATGTGCTGTGCATATTGTGGTGATTT  
 CTTCCGGTATACTGGGTTCCAATGTCAAGATTGTAATTTTTATGTACAAAAAATGTTACAC  
 CAATGTTGTTACTAAGTGTATTGCTAAAACCTTCTACTGATACGGATCCGGACGAGGCAAAGT  
 TGAACCACCGTATTCCTCATAGATTCCTGCCTACTTCAAACCGTGGTACTAAATGGTGTGT  
 CACTGTGGTTATTTTTACCATGGGGTAGACATAAAGTACGCAAATGTCTGAATGTGGTAT  
 AATGTGTCATGCTCAATGTGCTCATTTGGTTCCCGATTTCTGTGGCATGTCCGATGGAAATGG  
 CTAATAAAATTTGAAAACGATTCAGACACAAAACGTAATCAAGAGAAAAAGAAGAGGACA  
 GTTCCGTCCGCACAGTTGGGGTCATCTATTGGTACTGCCAATGGTAGTGATCTTTCCCATC

CAAATTAGCTGAAAGGGCAAACGCTCCTTTGCCTCCTCAGCCAAGAAAACATGATAAAACTC  
 CTTGCGCTCAGAAGGTAGGAAGAGATTCTCCAACCTAAGCAGCATGATCCTATTATTGATAAA  
 AAAATTTACTACAAACGCACGGGCGTGAGAACTAAATAAATTTATCGATGAAAATGAGGC  
 CTATTTAAATTTTACAGAAGGTGCACAACAAACCGCCGAATTTTCATCACCAGAGAAAACAC  
 TGGATCCAACGTCGAATAGACGTTCCCTTGGGACTCACTGATTTATCTATTGAGCATAGTCAA  
 ACTTGGGAATCTAAAGATGATTTAATGAGAGATGAACTTGAAGTGTGGAAAGCACAACGTGA  
 GGAAATGGAAGTTGAAATAAAACAAGATAGTGGGGAAATCCAAGAGGATCTAGAAGTTGATC  
 ACATTGATTTAGAGACCAAACAGAACTAGACTGGGAGAACAAAAATGATTTCCGTGAAGCT  
 GATTTGACAATAGATTCCACACACAAATCCATTCCGCGATATGAATAGTGAACCTTTCA  
 AATTGAACAAGACCATGCTTCAAAGGAAGTACTACAAGAAACAGTGTCTTGGCTCCTACAA  
 GTACTCATCCCTCCAGAACCCTGATCAACAATCTCCGCAGAAATCACAAACCAGCACAAAGC  
 GCAAAGCATAAAAAGAGAGCGGCTAAACGTCGTAAGGTTTCATTAGATAATTTTCGTATTACT  
 CAAAGTTCTTGGTAAAGGTAATTTTGGTAAAGTTATTTTATCTAAATCAAAGAATACTGACA  
 GGCTTTGTGCCATAAAAGTTCTGAAGAAAGATAATATTATCAAATCATGACATCGAGAGT  
 GCAAGAGCAGAAAAGAAAGTATTTTGTAGCCACAAAACTAAACACCCATTCTTAACCAA  
 TCTATACTGCTCTTTTCAAACGAAAACCGTATATATTTTGTATGGAGTTTATTGGGGGCG  
 GTGACTTAATGTGGCATGTTCAAACCAAAGACTATCTGTAAGAAGGGCCAAATTTTATGCC  
 GCCGAGGTCTTACTGGCTCTGAAATATTTTCATGATAATGGTGTAAATATACCGTGATTTGAA  
 GTTGGAAAACATTTCTATTAACCTCAGAAGGTCATATAAAAAATTGCCGATTATGGTTTTGTGTA  
 AAGATGAAATGTGGTATGGTAATAGAAGTTCTACATTTTGTGGCACACCAGAATTTATGGCT  
 CCAGAAATTTTAAAAGAGCAAGAATATACCAAAGCTGTTCGATTGGTGGGCATTTGGGGTGCT  
 GCTATATCAAATGCTACTGTGCCAATCTCCATTCTCAGGAGATGACGAAGATGAAGTTTTTA  
 ACGCTATCCTTACCGATGAACCTTTATACCCAATAGATATGGCAGGTGAGATTGTACAAATA  
 TTCCAAGGCCTATTAACAAAAGATCCTGAAAAGAGGTTGGGTGCTGGTCCAGGGACGCAGA  
 CGAAGTTATGGAAAGAACCTTTCTTCCGTAACATCAACTTTGACGATATCTTAAACCTTCGCG  
 TGAACACCCTTACATCCAGAAATTAATCTCCGGAAGATACATCATATTTTCAGCAAGAA  
 TTCACCTCTGCGCCACCCACACTTACACCTCTGCCCTCTGTTTTGACAACGAGCCAGCAAGA  
 AGAGTTTAGAGGATTTTCTTTATGCCAGATGATTTGGATTTATGA

>YGL014W 0.78 Cold

ATGCTACAAAAGTTTTGAAAGAAGAAATCGATGATGTACCATCAGTAGACCCTGTGCTTTC  
 AGAACAGTCAATTCTGCTTTAGAGCAGTTGCAACTAGATGATCCAGAGGAAAACGCCACCT  
 CTAATGCATTTGCGAATAAAGTTTCTCAAGATTCTCAATTCGCTAATGGCCCTCCGTCGCAA  
 ATGTTTCCACATCCACAAATGATGGGTGGAATGGGCTTCATGCCCTACTCTCAAATGATGCA  
 GGTTCCTCATAATCCTTGTCCATTTTTTCCGCCCTGATTTAATGATCCAACAGCACCAT  
 TGAGTAGCTCGCCCTTGAATGCAGGCGGTCCACCAATGTTATTCAAGAATGACTCACTTCCA  
 TTTCAAATGCTGTCTTCCGGGTGCTGCGGTAGCAACTCAAGGTGGACAAAATCTAAACCCATT  
 GATAAATGACAATTCAATGAAGGTATTGCCAATCGCATCGGCTGATCCGTTATGGACTCATT  
 CAAACGTACCAGGATCAGCATCTGTAGCCATTGAAGAAACCACCGCTACTCTACAAGAAAGC  
 CTACCATCTAAGGGCAGGGAGTCTAATAATAAGGCTAGTTCGTTTCAAGACAAACTTTTCA  
 TGCTTTATCACCAACTGACCTTATCAATGCGGCCAACAATGTAACCTTGTCAAAGGACTTCC  
 AATCTGACATGCAGAATTTTTCTAAGGCTAAGAAACCGTCTGTAGGAGCTAACAACTACTGCA  
 AAAACCAGAACTCAATCCATATCTTTTGGATAAATACTCCCTCCTCAACGTCATTTATACCCC  
 AACCAATAGTGTCTTGAGAAATATCCGATTTCAAATAGAAACCTCGAAGGAGGATTTGA  
 TTAATAAAACTGCACCAGCTAAAAAAGAGAGTCTTACAACCTTATGGTGCAGCATATCCATAT  
 GGGGGACCTTTACTTCAACCAAATCCTATTATGCCAGGCCACCCACATAATATATCCTCCCC  
 TATCTATGGTATTAGATCACCTTTTCTAATTTCTTATGAAATGGGCGCGCAATTTCAACCTT  
 TCTCTCCGATTTTAAATCCTACGAGTCATTTACTAAATGCAAATTTCTCCAATTTCTCTAACCC  
 CAATCGCCAATTCATCTTGCACCAGTTTTAAACCCTAGTTCAAATTTCTGTTGCCTTTTTCA  
 TATGAAGAATGATGGTGGTAAGCCCACCACCGATAACGACAAGGCGGGTCCAAATGTTAGGA  
 TGGATTTAATAAATCCTAATCTTGGGCCATCAATGCAACCTTTCCACATATTACCTCCCCAG  
 CAAAACACCCCCCTCCTCCCTGGCTTTATAGCACTCCACCTCCCTTCAACGCAATGGTTCC  
 GCCTCATTTGTTGGCTCAAAATCATATGCCGTTAATGAATAGCGCCAATAATAACATCATG  
 GTCGTAATAACAATAGCATGTCAAGTCATAATGACAATGACAACATTGGTAATTCTAATTAC  
 AACATAAAGACACAGGTGCTTCAACGTTGGTAAATGAAAAATATGAAAAACAGTTATCA  
 TGGCTACTATAATAACAATAATAATAATAATAATAACAATAATAATAACAGTAATG  
 CTACCAACAGCAACAGCGCGGAAAAACAACGTAAAATTGAGGAGTCGTCGAGATTTGCGGAC

GCAGTTTTAGACCAATATATCGGAAGTATTCCTCATTGTGTAAAGACCAACATGGTTGTCTG  
TTTTCTGCAAAAAGCAGTTGGATATTCTCGGCAGTAAGGCGGCGGACGCAATTTTTGAAGAAA  
CTAAGGATTATACGGTTGAATTGATGACTGATTCATTTCGGTAATTATTTGATCCAGAAGCTA  
TTGGAAGAGGTTACCACAGAACAAGAATCGTACTCACAAAAATATCTTCCCCTCATTTTGT  
CGAAATTTCTTAAACCCTCATGGTACTAGGGCATTACAAAAACTCATTGAATGCATCAAAA  
CAGATGAAGAAGCACAGATTGTTGTTGATTCTTTACGCCCTTATACTGTCCAGTTGAGTAAG  
GATTTAAATGGTAATCATGTTATTCAAAAAATGTTTGC AAAAGGTTGAAGCCGAAAACTCCA  
GTTTATCTTTGACGCAATCTCTGATAGCTGTATTGATATTGCTACTCATAGACACGGGTGTT  
GCGTTTTGCAACGTTGTCTAGATCATGGGACTACAGAACAATGTGACAATCTGTGTGATAAG  
TTGCTAGCCCTTGTGATAAAATAACTTTGGATCCATTTGGCAACTATGTGGTGAATATAT  
AATTACCAAAGAGGCTGAGAAGAACAATATGATTATACGCATAAAAATTGTCCACCTGTTGA  
AACCAAGAGCCATCGAACTTTCTATCCATAAAATTTGGATCAAATGTGATTGAAAAATCTTG  
AAGACAGCTATTGTTTCGGAGCCAATGATTCTGGAAATTTTAAATAATGGTGGCGAGACGGG  
TATTC AATCATTGTTGAATGATAGCTACGGAAATTACGTTTTACAGACAGCATTAGACATTT  
CTCATAAGCAAAAATGACTATCTCTATAAAAAGACTATCAGAGATTGTGGCGCCTTTACTGGTG  
GGCCCCATAAGAAAATACACCTCATGGTAAAAGAATCATCGGAATGTTACATTTAGATTCATA  
G

>YNL314W 0.8Cold

ATGGATGAATCGGTGGATCCTGTGGAGCTGCTTCTACGACTACTGATACGGCACAAAACCTCA  
TCTGAAACCATATGCCTACAGACAAGATAGCTGGCAAAGGGTGCTCGATGAGTACAACAGAC  
AGACTGGGTCAAGATATAGACAATCAAGGACGTTAAAAACCAAATTTTCGTCGACTGAAGGAC  
CTCTTCAGCGCAGATCGAGCCCAATTCTCTCCTTCCCAGTTGAAGCTGATGGGAGCACTCTT  
GGACGAAGCACCAGAACATCCAAGACCAAGAACTAAATTCGGAAATGAATCATCTTCATCCT  
TATCATCATCTTCTTTTCATTA AAAAGTCATCCGGGGCCTGATCCGTTTTCAACAATTATCATCC  
GCTGAACATCCGAATAACCACAGCTCCGACGATGAGCATT CAGGCTCACAAACCCTGCCCT  
GGATTCAATAACGATTGGAATTCGCGCTACTCTTCACACAATCCCCATGATTCTGTCTAAGG  
ATAACGACGTCGGGAAAGTCATCAAAGCCCTAAGATAAAACAAGGGTACAAATAGGTT CAGC  
GAGACAGTACTGCCTCCACAAATGGCTGCTGAGCAATCGTGGTTCGGACTCTAATATGGAATT  
GGAAATATGTCTAGATTATCTTCACAACGAACCTCGAGGTGATAAAGAAAAGGCAAGAAGATT  
TTGAGTGTAAGTTTTTAAACAAGCTCAACATAATTGAGGCTCTCCTTTCACAGATGAGACCA  
CCCAGCCAAGGAGATAAAAATATAA

>YIL016W 0.8Cold

ATGTCGCACAACGCAATGGAACATTGGAAGAGCAAGCTGAGCAAAAACAAGTACCTCGACGTA  
CGTCTCTTTGGCCGTGATTGCTGTTGTATTTTTGGTTACAATCAGAAGACCCAATGGCAGCA  
AGGGAAAAAGCAGTAAAAAGAGGGCTTCTAAAAAGAACAAGAAAGGTAAGAATCAGTTTGAA  
AAAGCGCCGGTTCTCTGACTCTAGAAGAACA AATTGACAATGTGTCTGTTGAGATACGGCAA  
CGAGTTGGAAGGTCGTAGCAAGGATCTAATAAACAGATTTGATGTGGAAGATGAAAAGGACA  
TCTACGAGCGTAAC TATTGCAACGAAATGCTTTTGAAGTTGCTGATTGAGTTAGACAGTATC  
GATTTGATTAACGTGGATGAGTCCTTAAGAAGGCCGTTGAAGGAAAAAAGGAAAGGCGTCAT  
AAAGGAAATTCAGGCTATGTTAAAAAGTTTGGACTCTCTTAAATAA

>YNL182C 0.68 Cold

ATGGATGAGCAAGTTATTTTTACAACAAATACCTCAGGAACAATAGCTTCTGTACACTCATT  
TGAACAGATAAAATTTGAGGCAATGCTCCACTCAATCAAGAAATAGCTGTGTTCAAGTAGGAA  
ATAAATACCTTTTTATTGCTCAAGCACAAAAGCATTAAATCAATGTCTACAATCTGTCAGGT  
TCTTTCAAAGAGAATCTGTTGAACAGCGCTTACCATTACCTGAAATCCTAAAATGTCTGGA  
AGTAGTTGAAAATGATGGTGTGCAGTATGATAGAATTC AAGGTGTCAATCATAATTTACCAG  
ACTTCAATCTTCCGTACCTTTTACTTGGCTCCACCGAATCGGGTAAATGTACATATGGGAG  
TTAAATTCAGGGATTTTATTGAACGTGAAGCCATGGCTCATTACCAAAGTATCACC AAGAT  
TAAGTCCATTTTAAACGGCAAGTATATTATTACTTCTGGTAACGATTTCGAGAGTTATTATAT  
GGCAAAC TGTGACTTGGTATCAGCGTCCAATGATGATCCTAAGCCTTTATGTATCCTTCAC  
GATCATACTCTACCCGTGACAGATTTCCAAGTTTCTTCTAGTCAAGGAAAATTTTTATCATG  
TACTGATACGAAACTCTTACAGTATCTCAAGATGCTACCATTAGATGCTATGATTTGAGTT  
TAATAGGCAGCAAAAAGAAGCAGAAGGCAAAACGAAAATGACGTTAGTATTTGGTAAGACCCCA  
GTATTGCTTGGCACATTTACAACCTTATCTATCAAATCCATTGTACTGGATCCTGCTGA

CAGAGCATGCTATATTTGGTACTGCGGAAGGTTGTTTTTCATTGAATTTATTTTATAAACTAA  
 AGGGTAATGCTATCGTTAATCTGCTACAGTCCGCCGGAGTAAACACAGTTCAAAAAGGTAGG  
 GTTTTTTCCCTAGTGCAACGTAACCTACTAACGGCGGCGAAAATGAAGATTTGGATGCACT  
 ATATGCAATGGGCCAACTTGTCTGTGAGAATGTCCTAAATTCAAATGTGTCATGCCTAGAAA  
 TATCAATGGATGGTACATTATTATTGATCGGTGATACGGAGGGGAAAAGTTTCTATTGCGGAA  
 ATTTACTCAAAAACAATCATTAGAACTATCCAACTTTAACTACATCACAGGATTCAGTTGG  
 AGAAGTGACCAATCTCTTAACCAACCCTTACAGACTCGAACGTGGAAATTTACTTTTTGAAG  
 GAGAATCCAAAGGCAAACAACCTAGTAATAATAATGGTCACAATTTTATGAAGATACCAAAC  
 TTACAAAGAGTTATCTTTGATGGTAAAAACAAAGGCCATTTACACGATATTTGGTATCAGAT  
 AGGAGAACCAGAAGCAGAGACAGATCCTAACCTCGCATTACCACTTAACGACTTTAATGCCT  
 ATTTGGAGCAGGTCAAAACGCAAGAATCGATATTTTACATATCGGTAAGGTGTCAAGCAAT  
 GTAAAAGTGATTGACAATAAAAATCGACGCCACTTCATCTTTAGACAGCAATGCCGCTAAAGA  
 TGAGGAAATTACAGAACTTAAGACCAACATAGAAGCATTAACTCATGCCTACAAGGAGTTAC  
 GTGACATGCACGAAAAGCTGTACGAGGAACACCAACAGATGCTTGACAAGCAATAA

>YNR023W 0.7 Cold

ATGTCCAAAGTAATGAAACCCAGCAACGGAAAAGGTTCTAGAAAAGAGTTCAAAAGCAGCCAC  
 ACCTGATACTAAAAATTTCTTTCATGCAAAAGAAAAGGATCCGGTGAACCAAGATAAAGCAA  
 ATAATGCTTCTCAAATTACGCCAACAGTGCCACATTTCTCATCCATCAGATATGGTTATCCCT  
 GACCATTTAGCCGAATTGATTCCTGAGCTGTATTCTTTCCAACAACCTGGTGGATTCCGAGAA  
 AAGATTAGATCATTTTTATTTCATCTGCGAAACTTACATATGAAGCGAATGGTTGCGCAGTGGG  
 AGAGGTCAAAGCTATCCCAAGAGTTTCTTTATCCTCATTTAAATTTTCCAATGTAAAAATTT  
 CTCCGAATCTTCATTTCAAATGTTAGTGAAAACCAACCCTGGCAAATGGACACAAACAATGA  
 GGCTGACCTTATGGCACTGGAGAATGCCACTTGGACGATGAGAATCGAAGGTGATTTATGG  
 ACAATGTGCAAGCTAATGATCCAGCAAGAGAAAAATTTAGCTCATTCATAGAATCGATAGTG  
 GTAGACTTCAAAAATAAGGAAAACGATAATGTGCCATCGACTAAATTTAATGCGGCCCTGA  
 AGAAAATGCCACCGAAGGACCCAGTGATAAAGAAATGAACTTAACTTACCGTTACAATTTT  
 CACTGCCGAATGGTGACAACCTCTACTACGACTAATACCGACCAAAATAATGCCACGATGGG  
 GAGGAGACTGCCAAAAGGATATGAGTTCTACAACCTCAAAAACCTAGAATCAGTGAAATGGCA  
 GTATGACCCGAATAATCCTGTAGACTTCGATGGTCTCGATATTAAGAGGGTAGGGTCTGAAA  
 ATGTAGAATGCACTATAAGCATCCTGCGAAAATCATCCCCAGAAGAGCCATTTATGAGCTAC  
 TCTCCACAACCTAACCGCAATAATAGGATTGAAGAGCGGTACATCACATGATGCAATATTTTC  
 CATATATAAATACATCCATTTAAATGAATTGCTTACCAATGATGAGTCTGCATTGCAAAAATT  
 TGATGGGCAACAGGAACAATCACAATAGCAACACCAGTACTAGTAAGATGCTTGATGCAGCC  
 TCCAGTCAAGTTTCTATTGTAAAATTAGACACTCAGCTTATTACCTTATTACCCAGCAGTCT  
 TAAAGAATCTTCTCCAGATACAATGAAATTAACGGATTTACTGTCCCTTATTAATAGTACTC  
 ACCTGCTCCCATTACAGCCAATTGAAATTGATTACACAGTACGCGTTGATAAAGCTTCCACT  
 TATGGTGAGTTGGTTCTTGATATTGAAGTACCTGATGTCAACGCTCTAAAATTCATAAATAC  
 ACAAGAGAAAAGTCAAATTGGGGCTGCTGAATTGAATGAAAATGCCAGGGAATTGGAACAAA  
 TCAAACCAAGATAGCTTTACAGGACAAAGAAAATAACGTCCGTTCTCTCGAATCTACACGAG  
 AGCAACAACGATACCGTTTCTTCAAGAAAATTAGTGAGGACCCAGTTAAAGCATTAAATGA  
 ATGCATTGCTTCTACCTCGAATGCTTTGAAAGTTTTATCGGGAGATGAGGGCTATAATGAAG  
 ATATGGTAAGGCGGGCTAACTTTTACAAGGAAAATGAAGCTATGTTGCGCGAGAATATAGAA  
 GTCATATTATCAAATGGACGAATGTAG

>YDR083W 0.76 Cold

ATGGCCTTATTTAACGTAGAAGGTTGGTCTATTAAGACAAAAACCGTCGTTTTTGATAACAA  
 GACTAATAAGTCTTCAAAAGATAAAAAAAAAAATAATAGAAAAAATGGCAAACCTTACAAGAG  
 AACAGAAGTTGAAAGAAGAGACAGAGGCTGAGTTGAAGGAACAAGTGGAAGACATTCCTTCC  
 GAAGGATCAGTAGCCAAAGACATCCCAAAAAAAAAACCAAGAGAAAAGTGATCAAAATGAAAC  
 GAGCAAGAAACGCAAGCACGATGAAGAAGCCCCTCTGATGCAAGTAAAAGAAAATATTGAAA  
 AACCTACAAAGAAGCAACTAACCCCTTTACAACAAAAGATGATGGCTAAACTGACTGGTTCT  
 AGATTTAGATGGATCAATGAACAACCTGTATACAATTAGCTCTGATGAAGCTTTGAAATTAAT  
 AAAAGAACAACCACAATTATTTGACGAATATCATGATGGTTTTAGATCACAAAGTGAAGCAT  
 GGCCGAAAATCCAGTTGATGTTTTTGTGACCAAAATTCGTTATAGATGCATGAAACCTGTG  
 AATGCTCCAGGTGGGTTACCAGGCTTAAAGGATAGTAAAGAAAATAGTTATTGCTGATATGGG  
 GTGTGGTGAAGCTCAATTAGCATTAGAAATCAACAATTTTTTCAAAAATTACAATAAGAAAAG



CGAAGAAATATTTGAAAAGACGCCATAAAGTCCACAGTTTTGATTTGAAGAAAGCTAACGAA  
 AGAATAACTGTGGCAGATATTAGAAATGTGCCGCTACCAGATGAGTCTGTACTATAGTGGT  
 CTTCTGCCTGGCTCTAATGGGTACAAATTTCTCGATTTTATAAAAAGAAGCTTATAGGATTT  
 TAGCGCCAAGGGTGAATTATGGATCGCAGAAATTAATCAAGGTTTGTAGTACGGCAAAAGGT  
 AATGAATTTGTAGACGCTTTGAAGCTGATGGGATTTTTTTCACAAAAGACCTTCGACGAGAA  
 TAAGATGTTTACAAGATTTCGAATTTTTTCAAGCCACCTGCGGAGATTATTGAAGAGAGAAGGC  
 AGAAATTGAAAAGAAGACAAAAGTTTTATTGAAGTTGAAACTGAGAAGGAAGAATTAGAAAAG  
 AAAAGACGGAAAATTGCCGAAGGAAAATGGCTCTTGAAGCCCTGTATTTATAAAAAGAAGATA  
 A

>YJR003C 0.78 Cold

ATGTTACGCTCTCTTCATTCTGCGGCTACGTTATCTAACAAAGAGGTTTTACTCTCTCATATC  
 TCATTTCAAATAGAAAGAACATAATCAAAAAGCTTCTACGTCACCCTTCTTTCGATCCAATTC  
 GTCATCATTTGCTGAAGATATAACCACCATTGACCATACTCTCTATCGCAGAATGTTATC  
 GAAAGTTTTAAACAAATTAGAGGTTCTTAAAAAGGATGCGGCCATGGTACACAATATGATGAT  
 AGAAAACCTTAAGTGATCTTGACTACGGCGTTGCAACAATTCACTCAAATAATTTGCGTGATC  
 TTGATTTAAAACCTTCACTTCCCGCCATCAAACAATTTATTAGGAATAATCCAGGAAGAGTA  
 CAAAGCTCTTGGGAACCTTTTTACACAATACAAGGCCTCAATGGAAAATGTTCTGATGAACT  
 GATGGAAGTGGTCTTAGAAAAAATTATCAAGTTTGACAAGGCAGAAAAGGTTGATGGAAAAA  
 AGAGTCTGACTTATCAAGACCTCGTTAGATGCTTTTATTTAATCAACCATTTTTCTTCAAAT  
 TATAATTTGCCTTCAGAGCTCGTGGAACCTATCCTTATTTACATAGTGGACAACGGAAATTC  
 CAATGTTTTAGGTTCTGTACTCAAATATAAAAATACCGCTGAGCTTTTTTGGATAAGTATGTCA  
 GTGAAATGACACAATACCAAATTTGTGAACTTTATGATTTTTTATTCGCTTGATAATATAGTA  
 GCTGATCCATTAGTACTACACAAGTGTCTAACTGTTCTGGGCGAAAACGAGAAAATTCAGCA  
 AACTGAAGAAGAAAAGAAATTTATTAGCAAGTTGGAGGAAGAAATAGATATTTGTTAAATCAC  
 AATGTCATGATAATTGGAGCCTCGAATTTCCGAATTGGAGTGTACGCAAAACTGCAACTTCA  
 TTCGAAGAATTTATTTTAGAGATCCAAAAAAGAAACATAGACAAGAAGGATTTTCGAATTAGC  
 TCACAAGCTGTTAAGATTAATTGGCGCTTTCAAAGGTAAAGTTTTCTCTATTTTTTAAATTTAT  
 ACGACGAATATCTCTTAAAATTCAAAATAATGAGGACGACTTAATGTTTGAAGCGTTTTTA  
 ACGCTCTGCTGCCAGGGTTATAAAGCAGTAATGAAAAAATGCTACAATACGCTGAAGCTTT  
 TATTAAGAAGACTTTGATTCCAACTAGAGAGTAAAATTCAAAGTGTGTTAATTGTTGCTA  
 ACGCGAAAGCAAATATTGATCTATCTCTCAAATTTACAATTCCTAATATATCTACTGCTAAA  
 CGAGAGAAAGATAAGTACACAGATCTTGCTGAAAGTGACGTATTAAGTGAATCGCTCATTTT  
 AGCATTTCTTATCCAGAGATGATGCTGATTTTGGCAGGGTCATCTTTGATGGCGCACTAGGAG  
 AAAAGCTGATATCAGGGCCGACTGCTGCAAAAAAATAAAAAATCTCTTAGCCAGTATGGA  
 GAAGCGTTAGAAACAAAACAAGCAAACAAGTTATGCAGACTAAGATAGAACATTATATGGA  
 AAGCATATAA

>YER041W 0.74 Cold

ATGGGTGTCTCACAAATATGGGAATTTTTGAAGCCATATCTGCAAGATTCAGAATTCGGTT  
 GAGAAAGTTTGTATAGACTTTAATAAATCGCAAAAAGAGCTCCAAGAATCGCGATTGACG  
 CATATGGATGGCTATTTGAGTGTGGATTTATCCAAAATATAGATATAAGCCCCAGATCTAGA  
 TCAAGATCAAGGAGTCTTACCCGTTCTCCGCGTGATAGTATCGACAGTAGTCAAGAATA  
 TTATGGTAGCAGAAGTTATACAACTACAGGAAAAGCTGTGATAAACTTCATATCTCGATTAA  
 AAGAACTACTGAGTTTAAACGTCGAATTTCTTGCTTGTATTTGACGGAGTTATGAAACCTCT  
 TTCAAAGGAAAATTTAACCACGAACAGAACGCTACTACTTGTGATGATGAGAAAGAGTACTA  
 TTCAAGCTGGGAACAGCATGTTAAGAATCATGAAGTTTATGGCAATTGTAAAGGATTGCTAG  
 CGCCATCTGACCCTGAGTTCATCAGTCTTGTACGGAAATTTATTAGACTTGATGAACATTTCA  
 TATGTAATCGCATGTGGGGAGGGAGAAGCCAGTGTGTTGGCTGCAAGTTTCTGGGGCTGT  
 AGATTTTCAATTTAAGTAACGATTCAGATACTCTCGTATTTGGGGGAGAAAAAATCCTGAAA  
 ATTACTCGAAATTTACGATGATTTTGGCCCAAGTTCAATAACTTCCCACAGTCCCAGTAGA  
 CATCATGATAGTAAAGAATCTTTTGTACTGTTATAGATCTACCCAAAATTAATAAAGTAGC  
 AGGGAAGAAGTTGATCGCCTGTCTCTCTTATTTTTTTCAGCGTGCTATTAGGTGCCGATTACA  
 ATCGTGGAGTCAAGGGTTTTGGGTAAAAACAATCTTTGCAGTTGGCTCAATGCGAAGATCCT  
 AACTTTTCCATGGAATTTTATGACATTTTCAAAGATTTCAATTTAGAAGATTTGACATCAGA  
 AAGTCTGAGGAAGTCTCGGTATAGATTGTTTCAAAAAGATTTATATTTTACTGCAAGGATC  
 ATCTGTGCGAGCTATTTGGAAGAAATTTATCCTGTTTTATTGAATCAAGGTTTCAATTTGAAGGC

TGGCCATCAACTGTCGCAATCATGCACTATTTTCACCCCATTTGTCCAACCATATTTTGTATGA  
 AGAAGTTCTCAGTGATAAAATACATAAAATATGGCTGGAAACGGACACTACAGAACTTAAATT  
 TCAATGAACTGAAATATTTTTTACAAAGTTTGAATTTGCCTCAAATTTCTAGCTTCGACAAG  
 TGGTTTCATGATTCATATGCACGAGATGTTTCTATTAAGAGAATTTTTATCAATTGATGAGTC  
 CGATAATATAGGTAAAGGTAATATGAGGATTACCGAAGAAAAAATTATGAACATAGATGGTG  
 GAAAGTTCCAAATACCATGTTTTAAAATACGGTATACAACATTCTTGCCTAATATAACCCATT  
 TCTTCTCAATCTCCTTTGAAGCGCAGTAATTCCTCCAGTAGAAGCAAGAGTCCACACGACG  
 TCAGATGGATATAATGGAACACCCAAATAGTCTTTGGTTACCCAAATACTTGATACCTCAAT  
 CGCATCCATTAGTAATTCATAATTATGAGACACAGCAACTTATACAGAAAAGAAAAGAGAAG  
 AAAGGTAAAAATCGAATAAGTCTCGGCTACCACAGAAGAATAACTTGGATGAGTTTTTAAG  
 AAAGCATACTTCGCCGATTAAGTATCGGAAAGGTAGGCGAGTCGAGAAAGGAAATCCTGG  
 AACCTGTGAGAAAAGGCTTTTTGTAGATACAGACGAAGATACTAGTCTGGAAGAAATACCG  
 GCTCCACAAGACTGACCACCGTCGATGAACACAGCGATAATGACGATGATTCGTTGATTTT  
 TGTAGATGAGATTACAAACAGCCAAAGCGTTTTAGATAGTTCACCCGGTAAAAGAATTCGGG  
 ATCTTACACAGGACGAACAGGTTGACGTTTGAAGGACGTAATAGAAATATCACCATAAAA  
 AAGTCAAGAACTACTAATGCTGAGAAAAATCCGCCTGAGTCTGGTTTTAAAATCAGCTCAAG  
 CATCACAATCAATGCTCGCCTTCAAGGTACTAAGATGTTGCCTCCAAACTTGACTGCTCCAA  
 GGTAGAAAAGAGAACACTCCTCTGTCCTTGACCAACTTGTACAGACGCACAAGATACAGTC  
 GACCGTTTTGTAGCCTGTGACAGTGATAGCAGTAGCACTATTGAATGA

>YLR143W 0.82 Cold

ATGAAGTTTATAGCATTAAATATCAGGTGGGAAGGACTCGTTCTACAATATTTTTCACTGCCT  
 GAAGAACAACCATGAATTGATTGCCCTGGGAAATATATACCCAAAAGAATCAGAAGAGCAAG  
 AATTAGACTCTTTCATGTTCCAAACAGTAGGACATGACTTAATAGACTATTATTCTAAATGT  
 ATTGGTGTTCCTACTATTTAGACGCTCAATATTACGGAACACTTCTAACAACGTCGAGTTGAA  
 TTATACTGCTACTCAGGATGATGAAATTGAAGAACTATTTGAACTTCTAAGAACTGTCAAAG  
 ATAAAATTCAGATTTAGAAGCTGTTAGTGTAGGTGCCATCTTATCGTCTTACCAGAGGACC  
 AGAGTGGAAAATGTTTGTTCAGATTGGGTCTAGTAGTGCTAAGCTATTTATGGCAAAGGGA  
 TCAAGCCGAACTAATGGGTGAAATGTGCCTTATGTCCAAGGATGTTAACAATGTTGAAAACG  
 ATACTAATTCAGGAAATAAATTTGACGCCAGGATAATCAAGGTGGCAGCAATTTGGATTGAAC  
 GAGAAACATTTAGGAATGTCCCTTGCCATGATGCAACCGGTGTTACAGAACTTAACCAACT  
 TTATCAAGTTCATATCTGTGGAGAGGGTGGGGAGTTTGAGACAATGGTCTTGGATGCCCTT  
 TTTTCCAACATGGATACTTGGAAATTAATTGATATTGTCAAATGTAGCGATGGTGAAGTTCAC  
 AATGCAAGGTTAAAGGTAATAATTTCAACCGCTAATTTGAGCAAAGTTTTTTACTCAACCA  
 ATTAGATCAATTACCTGTACCTTCGATTTTTGGTAATAAATTGGCAAGATTTAACCCAAAATT  
 TGCCAAAGCAACAAGCTAAAACAGGAGAACAAAGATTTGAAAATCACATGTCGAATGCTCTA  
 CCACAAACGACAATCAATAAAACCAATGATAAGTTGTACATCTCTAACCTACAATCACGTAA  
 AAGTGAGACGGTCGAGAAGCAAAGTGAAGATATTTTTACTGAGCTAGCCGACATTCTGCATT  
 CCAACCAGATTCACGGAATCATATTTTTATCTGCGTCATTATTAATTAGAGATATGTCTAAT  
 TTCGAAAAATCAACAAAATATACAATGAATTTTTAGATTTGTCAAATAACGGACCTTTGCC  
 ACCATCAAGAGCATGCGTAGGTTGCAAGTGTGTCGAGAAGATTGTCACGTACAGTTATCAG  
 TTGTTGTTGATGTAAAAAATACAGGCAAAGAAAAAATCAACAAGAATAAGGGCGGACTACAT  
 GTTCAAGGCCGTTTCAATTTGGGCTCCATGTAATATCGGACCATATTTCCAAAGTACTTGGTT  
 AAACGATGATGCAAACCAAGTCAGTTTTATCAGTGGGCAAATCGGACTAGTACCGCAGTCAA  
 TGGAATATTAGGAACACCTCTCACTGACCAAATAGTTTTGGCATTACAACATTTTGATACT  
 TTGTGTGAAACAATAGGAGCTCAAGAAAAGTTACTCATGACATGCTATATTTTACAGACGAATC  
 GGTCTCGACTCTGTTCATCAAAACATGGGCGTTTTATTGTTCAAATATGAATCATAGATCAG  
 ATCTATGGATGGACAAATCTGATGATGTTGAAAAATGCCTAGTTCTTGTAAAGATTTCTGAA  
 TTACCTAGAGGCGTGTGTCAGAATTTGGTGGTGTACTTGTAAAGATTAATAGTGGACGA  
 TAATGATTCGACAAGAAAGAAAGGGAAGAGAATGATGATGTTTCAACCGTATTCCAGAAAT  
 TGAATTTGAATATTGAAGGTTTTTCATAACACTACAGTTAGTGCCTTTGGATATAATAGAAAC  
 TTTATTACGGGATTTGTAGATAGTAGAGAGGAGTTAGAACTTATCTTGGAAAAAACCCCAA  
 ATCAGCCCAGATTACCCTCTATTATAATCCCAAAGAAATCATCACTTTCCACCATCACATTG  
 GATACTATCCGGTGGAGAACTTTTTGATTACCGTGGTAAAGAACACCGCTTTGGGTTGCAT  
 ATTCGTTCTCTAA

>YOR386W 0.73 Cold

ATGAAAAGAACGGTAATATCTTCCTCGAACGCATATGCTAGTAAGAGATCTCGGCTGGATAT  
 AGAACATGATTTTGAACAATACCACTCGTTGAACAAAAAATATTATCCAAGCCAATTACTA  
 GGACAGGCGCAAATCAATTCAATAATAAGTCTCGGGCTAAACCAATGGAGATTGTGGAAAAA  
 CTGCAAAAAGAAGCAAAAAACGTCGTTTGGAGAATGTTAGCACTGTCATGCACTGGTTTTCGAAA  
 TGATCTACGTTTATATGATAATGTGGGACTGTACAAAAGTGTTCGCTCTTCCAGCAATTGA  
 GGCAAAAAACGCAAAAGCCAAATTATATGCTGTTTATGTCATCAATGAAGATGATTGGAGA  
 GCCCATATGGATAGCGGATGGAAATTGATGTTTATAATGGGGGCGTTAAAAAATTTGCAGCA  
 GTCTTAGCCGAATTACACATACCTCTTCTTCTGTGGGAATTCACACTCCAAAAAGTACCT  
 TATCTAATTCAAAAGAGTTCGTGGAGTTTTTCAAAGAAAAATGTATGAATGTAAGTTCAGGA  
 ACAGGTACGATAATCACTGCTAATATAGAATACCAAACAGATGAACTGTACCGTGATATTAG  
 GCTGTTAGAAAAATGAAGACCATAGATTGCAATTGAAATACTACCACGACTCTTGCATTGTTG  
 CTCTGGATTGATCACTACTGACAGAGGCCAACCTATTCTGTGTTTACTCCATGGTACAAA  
 AAATGGGTGCTATATGTAATAATTACAAAAAGAGTACCTCTGAAATTTGTCATTTGCATAT  
 AATCGAACCATTAAAGTACAACGAAACTTTTGAAGTGAAGCCATTCCAATATTCATTACCGG  
 ATGAATTCCTTCAATATATACCTAAATCAAAAATGGTGCTTGCCAGACGTTTCTGAAGAAGCA  
 GCTTTATCCAGATTAAAAGATTTCTCTCGGTACAAAAAGTTCTAAGTACAACAATGAAAAAGA  
 CATGCTATATTTGGGTGGAACCTCTGGGCTAAGTGTATATATAACTACTGGTAGGATAAGCA  
 CAAGACTTATAGTCAACCAGGCATTTCAATCATGCAACGGACAATAATGTCAAAAAGCACTG  
 AAAGATAATTCGTCCACCCAAAAATTTCAATCAAAGAAGTTGCATGGAGAGATTTTTACAGACA  
 TTGTATGTGCAACTGGCCATATACCTCAATGGGAATGCCATTATCGATTGGACACTTTAGATA  
 TAAAATGGGAGAATAACCCTGTAGCATTTGAAAAGTGGTGTACTGGTAATACAGGCATTCCC  
 ATAGTCGATGCCATAATGAGAAAATTAAGTGTACACAGGCTATATTAATAACAGATCTAGAAT  
 GATCACAGCTTCTTTTCTTTCTAAAACTTATTAATAGATTGGAGATGGGGGGAACGCTGGT  
 TTATGAAACACTTGATAGACGGTGATTTCGTCTTCAAATGTTGGTGGCTGGGGTTTTTGTCT  
 AGTACAGGAATTGATGCCCAACCATATTTTAGAGTTTTTAATATGGATATACAAGCAAAAAA  
 ATATGACCCACAAATGATATTCGTCAAACAATGGGTTCCCGAATTGATTTCTTCCGAAAATA  
 AGCGTCCAGAAAACCTATCCAAAACCTTTAGTTGATTTAAAGCATAGTAGGGAGCGTGCTTTG  
 AAAGTTTATAAAGACGCAATGTGA

>YPL237W 0.82 Cold

ATGTCCTCCGATTTAGCTGCTGAGTTAGGATTGCACCCTGCCTAAAGAAGAAAAAGAAGAC  
 TAAGAAGGTGATCCCAGATGATTTTGATGCTGCCGTAAACGGCAAAGAAAATGGTTCAGGAG  
 ATGATTTTATTTGCCGGATTAAAAAAGAAAAAGAAGAAGTCCAAGAGCGTTTCTGCCGATGCT  
 GAAGCTGAAAAAGAGCCTACTGACGACATAGCAGAAGCCTTGGGTGAACTATCCTTGAAGAA  
 GAAAAAGAAAAAGACAAAGGACAGCAGTGTAGACGCGTTTGGAAAGAAGTACTAAAGCTG  
 GTCTAGATAATGTGGATGCTGAAAGCAAAGAAGGCACTCCAAGTGTAAATCCAGCATTCAA  
 CAAGAAGTTGGCCTACCTTATTCAGAGTTAATTATCTAGATTTTTTCAATATTCCTAAGAACTAA  
 CAATCCAGAAGTTCGTGGTGATAGAAGTGGTCCAAAGTTCAGAATTCCTCCTCCTGTTTGT  
 TGCGTGATGGTAAGAAGACTATTTTCTCGAATATCCAAGATATCGCCGAAAAAATTGCATAGA  
 TCTCCGGAACATTTGATTCAATATCTCTTCGAGAATTAGGTACGTCCGTTCTGTTGACGG  
 TCAGAAAAGATTAGTCATTAAGGGTAAGTTTCAATCCAAACAATGGAGAATGTCTTAAGAA  
 GATACATTTTGGAGTATGTCACCTGTAAGTGTAAAGTGTAAAGTGTGGTTCTACCAGATCCGTCTC  
 TTCTATTAACCGGTTTCCAAGCTACCGTTGGTAAGAGAAGGAGAATGTGA

>YDR020C 0.79 Cold

ATGGACAGAAAAGCTGTCGAAGAAAAAGAATTGTTATTTCTATCGGTGGAGGGCATGCTAC  
 TGGTGTTGGAGCAATTGCACTGGATTTACAAAATACTTTCAAAGCCTATATAACTCTATCA  
 ATATAAGGGTAATAAACCTAGATAAATATGATAGAAGGGAACATCAAGAGCTACAATAATAAC  
 GACTATGATTTTGAATAATATCCTTAATTTGGTATATGAAAAGCAGCTGTAACCTCTCAAAA  
 TGACATGATTC AACATGATTACGAGGACCCGATAGATTTGATAATAGTATGTGGCTGTTATG  
 CGCTATACGATAAACGCATCAACGAAATATCTCAATTAAGTATTCTTGGATAGTGATGCA  
 GATAAAAGATTAATTAGTCTAATCAAGAAGAAGCAGTAGGGAGCAATGAACAACCTAGCCCA  
 GTTGATCACTGAGTATATGGACCATCTGCGCCGGAGATGCAACAATATATAGAGCCCACTA  
 GAACTTTTGCAGATTTGATCATTCCTTCTACAAATGAAAATCTAGGGCGCGCAGTCTCTCGTG  
 GACGGTATAGTTAAAGCAATCGAAGATACCAAAGCCAAATAGAAGGCAACAATACGAACAA

CAAAATACGCCACGTTTATGGGATTTCGAAGCTGAAACAATGGACTTGGAGAAAGATAGAT  
ATTACGATCTGTCATGA

>YOR015W 0.79 Cold

ATGCCACATTTCAAAGAGCAGCAGTATATGAAGAGCAAAAAGAACTGGTAAATGGGGTCA  
ACTTGTGAAGAAACCAAAGATAGAATCCCCGAATATTCGAACAAAACCTATAGCAAAGATAA  
GCCACTTGACAATGGTTGTTGTGGCCTGAGATAAAGGTCCTTTTTCTCATCATTTGAGC  
ATACTTCAATCGATGTGTCTTCATTTTATTATTTCTATACTTTTCTCAAATATATCTTCGT  
TTTTCTTTTCGCTTTCCTTCTTCCTTCTGCCTTTCCTCTATTTATTTTGCACCTCCACTCTTT  
TCCGTAAACCTTGCCTATCTATTTATTGGATTTTTGAAAACCTAAAGTATAA

>YOR128C 0.82 Cold

ATGGATTCTAGAACAGTTGGTATATTAGGAGGGGGACAATTGGGACGTATGATTGTTGAGGC  
AGCAAACAGGCTCAACATTAAGACGGTAATACTAGATGCTGAAAATTCCTGCCAAACAAA  
TAAGCAACTCCAATGACCACGTTAATGGCTCCTTTTCCAATCCTCTTGATATCGAAAACTA  
GCTGAAAATGTGATGTGCTAACGATTGAGATTGAGCATGTTGATGTTCTTACACTAAAGAA  
TCTTCAAGTAAAACATCCCAAATTAATAATTTACCCTTCTCCAGAAAACAATCAGATTGATAC  
AAGACAAATATATTTCAAAGAGCATTAAATCAAAAATGGTATAGCAGTTACCCAAAGTGTT  
CCTGTGGAACAAGCCAGTGAGACGTCCTTATTGAATGTTGGAAGAGATTTGGGTTTTCCATT  
CGTCTTGAAGTCGAGGACTTTGGCATAACGATGGAAGAGGTAACCTTCGTTGTAAAGAATAAGG  
AAATGATTCCGGAAGCTTTGGAAGTACTGAAGGATCGTCTTTGTACGCCGAAAATGGGCA  
CCATTTACTAAAAGATTAGCAGTCATGATTGTGAGATCTGTTAACGGTTTTAGTGTTCCTTA  
CCCAATTGTAGAGACTATCCACAAGGACAATATTTGTGACTTATGTTATGCGCCTGCTAGAG  
TTCCGGACTCCGTTCAACTTAAGGCGAAGTTGTTGGCAGAAAATGCAATCAAATCTTTTCCC  
GGTTGTGGTATATTTGGTGTGGAATGTTCTATTTAGAAACAGGGGAATTGCTTATTAACGA  
AATTGCCCAAGGCCTCACAACTCTGGACATTATACCATTGATGCTTGCCTCACTTCTCAAT  
TTGAAGCTCATTTGAGATCAATATTGGATTTGCCAATGCCAAAGAATTTACATCTTTCTCC  
ACCATTACAACGAACGCCATTATGCTAAATGTTCTTGGAGACAAACATACAAAAGATAAAGA  
GCTAGAAACTTGCAGAAAGAGCATTTGGCGACTCCAGGTTCTCAGTGTACTTATATGGAAAAG  
AGTCTAGACCTAACAGAAAAGTAGGTCACATAAATATTATTGCCTCCAGTATGGCGGAATGT  
GAACAAAGGCTGAACCTACATTACAGGTAGAACTGATATTCCAATCAAATCTCTGTGCTCA  
AAAGTTGGACTTGAAGCAATGGTCAAACCATTTGGTTGGAATCATCATGGGATCAGACTCTG  
ACTTGCCGGTAATGTCTGCCGCATGTGCGGTTTTAAAAGATTTTGGCGTTCCATTTGAAGTG  
ACAATAGTCTCTGCTCATAGAACTCCACATAGGATGTCAGCATATGCTATTTCCGCAAGCAA  
GCGTGAATTAACAATATTCGCTGGAGCTGGTGGGGCTGCTCACTTGCCAGGTATGGTGG  
CTGCAATGACACCCTTCTGTCTCATCGGTGTGCCCGTAAAAGGTTCTTGTCTAGATGGAGTA  
GATTCCTTTACATTCATTTGTGCAAATGCCTAGAGGTGTTCCAGTAGCTACCGTCGCTATTA  
TAATAGTACGAACGCTGCGCTGTTGGCTGTCAGACTGCTTGGCGCTTATGATTCAAGTTATA  
CAACGAAAATGGAACAGTTTTTTATTAAGCAAGAAGAAGATTCTTGTCAAAGCACAAAAG  
TTAGAACTGTGCGTTACGAAGCTTATCTAGAAAACAAGTAA

>YEL014C 0.78 Cold

ATGACAGCACTATTCTGCCTTGAATTGAGAATAATATATTTCTAATAATGAATGATTGTAT  
TATTATCAATTACTGGAAAGGGTTCATTTTTTCTTTCCACTCGTATTTTTTCTTTTCGTT  
TTGAGTCCCTTAAGGGCTCATTACCCGGGAAAGAGAAATTAATCAGATTTTTTCTGTATA  
CCGTTACCTTATTATATAGATGTTTCGCAGTTTTTCATATTTGTGAGAGCCAACACATTATGC  
ATTACCGCTACAGATCCCACTTCCTTACCGTATGCTTATACGTATGTATCCAGTTTAG

>YPL009C 0.81 Cold

ATGAAGCAAAGAATTAGTGCCCTAGATTTACTGCTGTTGGCTAGAGAGCTGAAACAGGATTT  
GGAAGGCTACCGATTGAGTAATATATATAACATTTGCCGATTCCTCAAACAATTTTTGCTGA  
AATTTAATAAAACAGATTCTAACTCAATGTTGTTGTGCGATTGTGGCTTAAGAATTTACTTA  
ACTGAATTTAGTAGGCCAATACCTCCAACCTCCTCCGGCTTTGTTGTCAAACCTAAGGAAGCA  
TCTTAAAGCTAAACGGTTAACAGCTTTAAAGCAAGTAGACCAGGATAGAATTTCTTGTCTAC  
AATTTGCTGATGGCCACTTCTATTTAGTTTTGGAATTTTTTCAGTGCAGGGAATGTCATCTT  
CTAGATGAGAACAGAAGAATTATGGCTTTGCAAAGAGTCGTTCTAGAGCATGAAAATAAGGT  
CGGACAAATTTATGAAATGTTGACGAATCACTTTTTTACCACAATAACGAGTCTGCTGATG

AATCCATAGAAAAAACAGAAAGGCAGAATACACCTCTGAACTAGTCAACGAGTGGATAAAA  
 GCAGTTC AAGCCAAGTATGAATCAGACATTACTGTTATTAAGCAACTTAACATTCAAGGGAA  
 GGAGGGCGCTAAAAAAGTGAAGTACCTTCCATCCATAAACTGCTGCTTTCGAAAG  
 TCCCTCATTTGTCTTCAGATTTATTATCAAAGAACCTTAAGGTATTCAATATCGACCCTTCA  
 GAGTCTTGTAAATCTTTTGGAGGAAACAGACTCACTCGCCGAATTGCTAAACAGTACTCA  
 GTTAGAATATAATCAACTTTTAACTACCACCGATAGAAAGGGTTACATTTTGGCCAAAAGAA  
 ATGAAAATTATATCTCTGAAAAAGATACTGCCGATTTGGAATTTATTTATGATACATCCAT  
 CCCTTTAAGCCATATATAAATGGGGGAGACACTGACTCTTCTTGTATCATTTGAAGTTGAAGG  
 TCCTTACAATAGGACGCTAGACAAATTTTCTCAACAATAGAATCCTCTAAGTATGCTCTAC  
 GTATACAAAATCAGGAATCGCAAGCGCAAAAAGAAAATCGATGATGCTCGTGCCGAAAATGAT  
 AGAAAAATACAAGCTTTATTAGACGTCCAAGAATAAATGAAAGGAAAGGCCATCTCATAAT  
 TGAAAATGCACCCTTAATAGAGGAAGTTAAGCTTGCTGTTTCAGGGTCTAATCGATCAACAAA  
 TGGACTGGAACACTATTGAGAACTAATTTAAAAGTGAACAAAAAAGGCCAACAGAATTGCT  
 CAGCTTTTGAACCTGCTTTGAACTTGAACAGAACAAAAATAGCGTCAAGCTTGATCTCTC  
 TAGCAAGGAACTCAACACTTCTTCAGACGAGGACAATGAATCAGAAGGCAATACTACTGATA  
 GTTCTAGTGACTCAGACTCAGAAGACATGGAGAGTTTGAAGGAGAGGAGTACAAAAAGTATG  
 AAAAGAAAATCTAATGAAAAGATAAACGTTACAATTGACCTTGGTTTATCAGCTTATGCCAA  
 TGCCACTGAATATTTCAATATCAAAAAACAAGTGCTCAAAAAGCAGAAAAAAGTCGAAAAGA  
 ATGTCGGCAAGGCTATGAAGAATATTGAAGTCAAAATTGATCAACAATTGAAAAAAGCTA  
 AAAGATTCTCACAGTGTCTTAAAAAAGATCCGCACTCCTTACTTTTTTAAAAATATAGTTG  
 GTTTATTTCAAGTGAAGGATTTTGGTTCATGATGGGTAAAAGTCCGGCTGAGACAGATCAAA  
 TCTATTTCAAAATATATTGAAGATGATGATATTTATATGTCCAATAGTTTTAACTCTCATGTA  
 TGGATCAAAAATCCAGAAAAACAGAAGTTCACCGAACACTTTTGATGCAAGCGGGTATACT  
 ATGCATGTCTCAAGCGAGGCTTGGTTCGAAAGAATATCTTCTTCTCCATGGTGGTGGCTTTG  
 CAAAGAATGTTAGTAAATTCGATGGCTCTGATAACTCCATTCTGCCAGAAGGTGCCTTTCCG  
 TTGAAAAATGAGAATGATCAAAAACATTTACCCCTGCTCAACTTGTGATGGGTTTTGGATT  
 TTTATGAAAAGTGAAAACCAGTGAAATGAGGATAATGGTGATGATGACGAAGAAGAAGAAG  
 AAGAAGAAGAGGAAGAAGAAGAAGAAGAAGAAGAAGAAGAAGAAGAAGAAGAAGAAGAAAA  
 GAAGAAGAAGAAAAAGAAGAAGAGCAACAGCAAGATGAAGACGATAGTAACGAGGTCAATGG  
 GTTAGAGAAGGGTGGAGATTCAAACGATAGCACGAAAAACAACAGTTTTGAACACGATAATC  
 TTGAAAAAGACATCGAAAAGCATTGCACCATATCATCCGATACCGACTCTGATTCTGGAAT  
 GCTAAAGCCAAAAATGACAATAGCAGTACGCAGCGTATCCTTGATGAACCAGGTGTTCCGAT  
 ATCTTTAATCGAAAACATAAACAGTAACGTCCGTGGTAAAAGAGGAAAAATTGAAGAAAAATC  
 AAAAGAAATACGCCGACCAGGATGAAACTGAACGTCTCTTGCCTTTGGAGGCCCTTGGGTACT  
 TTGAAGGGTATCGAAAAGCAGCAACAAAGGAAGAAGAAGAATAATGAAGCGAGAAGTTAG  
 AGAAGATAGAAAAGAATAAACCGCGAGAAACAAAGAAGACTACAGGCTTTAAAATTCACCAAAA  
 AAGAGAAAGCAAGAGTGAACATATGATAAACACAAGTCCGAATTTAAACCATCTCTCGATAAG  
 GCGATGTGGTTGATGATATTATACCAGTATTTGCCCCCTGGCCTGCGCTTTTGAATATAA  
 ATACAAAGTCAAAAATACAACCGGAAGTGCGAAGAAAACCTAAGACTTTAACTGAAATTTTAC  
 ATTATTTCAAGAGTAGACCCTAGACGGTCTTCAACTGACAACGAAATGGATTGGCCCCAA  
 GAACATGAAATGATTAAGGCTTGAAGGAACAGGACTTGGTCTTCTGCTCTGTGTGCGACAA  
 GTTAAAAGTAAACAATCGCTGGGCAGAAATCCACCAAGAACGGTGGTAACTCTTCGAAGAAGG  
 GCAAAAAAACGCTAA

>YCL069W 0.74 Cold

ATGAATATGCTCATTGTCGGTAGAGTTGTTGCTAGTGTGGGGGAAGCGGACTTCAAACGCT  
 TTGCTTTGTTATTGGTTGTACGATGGTTGGTGAAGGTCACGTCCATTGGTGATTTCCATCC  
 TAAGTTGTGCATTTGCTGTAGCTGCTATCGTTGGTCCATAATCGGAGGTGCCTTTACAACC  
 CATGTTACCTGGAGGTGGTGTCTTATATCAATCTTCTATCGGTGGTCTTGCCATTATTAT  
 GTTTTACTCACATATAAGGCCGAGAATAAGGGTATACTTCAACAAATTAAGATGCTATAG  
 GAACAATCTCGAGCTTTACTTTTAGTAAGTTCAGACACCAAGTTAATTTTAAAAGACTTATG  
 AATGGCATAATCTTCAAGTTTGACTTCTTTGGTTTTGCCCTCTGCTCTGCAGGGCTGGTCTT  
 TTTCTACTGGGGCTAACCTTTGGTGGTAATAAATATAGTTGGAACCTTGCCCAAGTCATCG  
 CATATTTGGTTTTGGGTGTCTTACTTTTTATTTTTTTCATTGGTGTACGATTTCTTCTTATTC  
 GATAAATTC AACCCGGAACCTGATAATATATCCTACAGGCCCTCCTTCTAAGAAGATTGGT  
 AGCAAACCCAGCCATAATAATAAACATGGTAACATTTCTATTATGTACCGTTACAATG  
 GGCAAATGATATACTCTGTCCAGTTTTTCCAACCTTATATTTGCGTTCGAGTGCATGGAAAGCC

GGTCTTCACTTGATAACCAATCGTTATTACCAACGTTATTGCGGCCATTGCAAGTGGTGTGAT  
TACCAAAAAGCTCGGTTTAGTTAAACCACTCTTAATATTTGGAGGCGTCTTGGGGTAATTG  
GAGCAGGGCTTATGACACTTATGACAAATACGTCCACGAAGTCAACTCAAATTTGGTGTTTTG  
CTATTACCGGGGTTTTCCCTTGGATTTGCTCTACAAGCATCGCTCATGAGTGCACAGCTTCA  
AATTACCAAAGATCGTCCAGAAGCTGCTATGGACTTTATTGAAGTAACAGCTTTCAATACAT  
TCATGAAGTCATTAGGTACAACCTCTTGGTGGTGTGCTTTCAACCACTGTTTTTTCCGCCCTC  
TTTCACAACAAAAGTATCACGAGCTCATCTAGAGCCTTACGAAGGAAAAACGGTTGATGACAT  
GATTTTGTATCGTCTTCAAAACTACGACGGTCTCATTTCGACTATTGGAAACATTTTAAGCG  
ACTCCATTAAGAACGTATTTTGGATGGATCTAGGGTTTTATGCCTTAGGATTTTTGTTTTGT  
AGTTTTTCATCCAATAAGAAATTAATCATAACAAAAAAGGACGAGACACCAGAAGATAATTT  
AGAAGACAAGTAG

>YNL005C 0.78 Cold

ATGTGGAATCCTATTTTACTAGATACTTCTAGTTTTTTCATTCCAAAAACATGTGTCTGGTGT  
GTTCCCTTCAAGTGCCTAATGCCACCAAAAGGGCTGCGGGCTCGAGAACAAGTATGAAGGATT  
CTGCAGGAAGAAGGTTAGGACCAAAAAAATATGAAGGCCAGGATGTTTCCACAGGTGAAATT  
ATTATGAGGCAAAGAGGAACAAAAGTTTTATCCTGGAGAAAACGTTGGTATAGGGAAAAGATCA  
TTCCATATTTCGCTTAGAACCTGGTGTGTTGTTTCGTTACTATCTTGATCCTTTTTCATCTAAA  
GAAAATTCATTGGTGTGCTTGGAGCGTGATTTGAAACTGCCATCTCCTCATTTTGAGCCT  
ACCGTAAGGAGGTTTGGCCGTTTTGAGTTAACAAATAAAAAGGGCAGCATATAAGGAAGAAAA  
TTCTATTTCTAGAAAAGACTATCTCGCAAAACCTAATATTTTGAAGCAGTTAGAGGTCAGGG  
AATCTAAAAGAAAGGAGTTACAAGACAAGTTGAGTAAGGTTCTTCGGGATGAACTTAAAGTTA  
GATATAAAAAGACATCGAATTGGCAACGTCATACTTAATTCGTGTAAGGGCTTCCCTGAAGAA  
TGGATACCCCATAGAAGATGCAAGGTTCAATAGTAGATATTATTTAAAAGAAGAAGAGCGTT  
TGAAGGCAAGGAGAGAAAGCTGGACGAATGAGAAATTGTCGGAGAGTCTATCCAAGATTGAT  
GAGTGTAGTGATCTTTTGAACCTCATCTACATCTTTCAATAACAAGCTAGAGCTACACCAGTA  
TATTTCCGAACAAGAAAAACAAGCTTTGAAGGCAAAACTATTAGAGGACCTAGAAAAATCCC  
AACACTTAGAAACCAAAAAAGACAAGAATTATATTAAGGCGTTTTTCAAGGACGCTTGTAAT  
TTTTTGACTTTTATCTGAAGAAGTACATTTGCGTAGGAAATACTTAAAGTCGGTCTTCCCGA  
AACAGATAGTACGGTTGAAACCAAAAGCGGGAAGAAGTCAATTGTGTCTAGACGTTTTGATT  
ACACCAAAAATAAAGTTGAAGTCATTGCTAGAAGTAGGCGGGCTTTTTTGGAGCAAGCTTTGA

>YNL182C 0.68 Cold

ATGGATGAGCAAGTTATTTTTACAACAAATACCTCAGGAACAATAGCTTCTGTACACTCATT  
TGAACAGATAAAATTTGAGGCAATGCTCCACTCAATCAAGAAATAGCTGTGTTCAAGTAGGAA  
ATAAATACCTTTTTTATTGCTCAAGCACAAAAAGCATTAAATCAATGTCTACAATCTGTGAGG  
TCTTTCAAAGAGAATCTGTTGAACAGCGCTTACCATTACCTGAAATCCTAAAATGTCTGGA  
AGTAGTTGAAAATGATGGTGTGCAGTATGATAGAATTCAGGTTGTCATCATAATTTACCAG  
ACTTCAATCTTCCGTACCTTTTACTTGGCTCCACCGAATCGGGTAAATTTGACATATGGGAG  
TTAAATTCAGGGATTTTTATTGAACGTGAAGCCTATGGCTCATTACCAAAGTATCACCAAGAT  
TAAGTCCATTTTAAACGGCAAGTATATTACTTCTGGTAACGATTTCGAGAGTTATTATAT  
GGCAAACCTGTTGACTTGGTATCAGCGTCCAATGATGATCCTAAGCCTTTATGTATCCTTCAC  
GATCATACTCTACCCGTGACAGATTTCCAAGTTTCTTCTAGTCAAGGAAAATTTTTATCATG  
TACTGATACGAACTCTTACAGTATCTCAAGATGCTACCATTAGATGCTATGATTTGAGTT  
TAATAGGCAGCAAAAAGAAGCAGAAGGCAAACGAAAATGACGTTAGTATTGGTAAGACCCCA  
GTATTGCTTGCAGACATTTACAACCTCTTATCTATCAAATCCATTGTACTGGATCCTGCTGA  
CAGAGCATGCTATATTGGTACTGCGGAAGGTTGTTTTTTCATTGAATTTATTTATAAACTAA  
AGGGTAATGCTATCGTTAATCTGCTACAGTCCGCCGGAGTAAACACAGTTCAAAAAGGTAGG  
GTTTTTTCCCTAGTGCACGTAACCTACTAACCTGGCGGCGAAAATGAAGATTTGGATGCACT  
ATATGCAATGGGCCAACTTGTCTGTGAGAATGTCCTAAATTCAAATGTGTCTATGCCTAGAAA  
TATCAATGGATGGTACATTATTATTGATCGGTGATACGGAGGGGAAAAGTTCTATTGCGGAA  
ATTTACTCAAAACAAATCATTAGAATATCCAACTTTAACTACATCACAGGATTCAGTTGG  
AGAAGTGACCAATCTCTTAAACCAACCCTTACAGACTCGAACGTGGAAAATTTACTTTTTGAAG  
GAGAATCCAAAGGCAAACAACCTAGTAATAATAATGGTCACAATTTTATGAAGATACCAAAC  
TTACAAAGAGTTATCTTTGATGGTAAAAACAAAGGCCATTTACACGATATTTGGTATCAGAT  
AGGAGAACCAGAAGCAGAGACAGATCCTAACCTCGCATTACCACTTAAACGACTTTAATGCCT  
ATTTGGAGCAGGTCAAAACGCAAGAATCGATATTTTACATATCGGTAAGGTGTCAAGCAAT

GTAAAAGTGATTGACAATAAAAATCGACGCCACTTCATCTTTAGACAGCAATGCCGCTAAAGA  
 TGAGGAAATTACAGAACTTAAGACCAACATAGAAGCATTAACTCATGCCTACAAGGAGTTAC  
 GTGACATGCACGAAAAGCTGTACGAGGAACACCAACAGATGCTTGACAAGCAATAA

>YNL182C 0.68 Cold

ATGGATGAGCAAGTTATTTTTACAACAAATACCTCAGGAACAATAGCTTCTGTACTCATT  
 TGAACAGATAAAATTTGAGGCAATGCTCCACTCAATCAAGAAATAGCTGTGTTCAAGTAGGAA  
 ATAAATACCTTTTTATTGCTCAAGCACAAAAAGCATTAAATCAATGTCTACAATCTGTCAGGT  
 TCTTTCAAAGAGAATCTGTTGAACAGCGCTTACCATTACCTGAAATCCTAAAATGTCTGGA  
 AGTAGTTGAAAATGATGGTGTGCAGTATGATAGAATTCAGGTGTCAATCATAATTTACCAG  
 ACTTCAATCTTCCGTACCTTTTACTTGGCTCCACCGAATCGGGTAAATGTACATATGGGAG  
 TTAATTCAGGGATTTTTATTGAACGTGAAGCCTATGGCTCATTACCAAAGTATACCAAGAT  
 TAAGTCCATTTTTAAACGGCAAGTATATTATTACTTCTGGTAACGATTTCGAGAGTTATTATAT  
 GGCAAATGTTGACTTGGTATCAGCGTCCAATGATGATCCTAAGCCTTTATGTATCCTTCAC  
 GATCATACTCTACCCGTGACAGATTTCCAAGTTTCTTCTAGTCAAGGAAAATTTTTATCATG  
 TACTGATACGAAACTCTTACAGTATCTCAAGATGCTACCATTAGATGCTATGATTTGAGTT  
 TAATAGGCAGCAAAAAGAAGCAGAAGGCAAAACGAAAATGACGTTAGTATTGGTAAGACCCCA  
 GTATTGCTTGCGACATTTACAACCTCTTATTTCTATCAAATCCATTGTAAGTACTGGATCCTGCTGA  
 CAGAGCATGCTATATTGGTACTGCGGAAGGTTGTTTTTCAATTGAATTTATTTTTATAAACTAA  
 AGGGTAATGCTATCGTTAATCTGCTACAGTCCGCCGGAGTAAACACAGTTCAAAAAGGTAGG  
 GTTTTTTCCCTAGTGCAACGTAACCTACTAAGTGGCGGCGAAAATGAAGATTTGGATGCACCT  
 ATATGCAATGGGCCAACTTGTCTGTGAGAATGTCTAAAATCAAATGTGTTCATGCCTAGAAA  
 TATCAATGGATGGTACATTATTATTGATCGGTGATACGGAGGGGAAAAGTTTCTATTGCGGAA  
 ATTTACTCAAAAACAATCATTAGAATATCCAACCTTTAACTACATCACAGGATTCAGTTGG  
 AGAAGTGACCAATCTCTTAACCAACCCTTACAGACTCGAACGTGGAAAATTTACTTTTTGAAG  
 GAGAATCCAAAGGCAAACAACCTAGTAATAATAATGGTCACAATTTTTATGAAGATACCAAAC  
 TTACAAAGAGTTATCTTTGATGGTAAAAACAAAGGCCATTTACACGATATTTGGTATCAGAT  
 AGGAGAACCAGAAGCAGAGACAGATCCTAACCTCGCATTACCCTTAACGACTTTAATGCCT  
 ATTTGGAGCAGGTCAAACCGCAAGAATCGATATTTTACATATCGGTAAGGTGTCAAGCAAT  
 GTAAAAGTGATTGACAATAAAAATCGACGCCACTTCATCTTTAGACAGCAATGCCGCTAAAGA  
 TGAGGAAATTACAGAACTTAAGACCAACATAGAAGCATTAACTCATGCCTACAAGGAGTTAC  
 GTGACATGCACGAAAAGCTGTACGAGGAACACCAACAGATGCTTGACAAGCAATAA

>YDR325W 0.75 Cold

ATGCAAGATCCTGATGGTATTGACATTAATACGAAAATCTTTAACTCAGTTGCTGAAGTATT  
 TCAAAAGGCACAGGGTTCTTATGCAGGACACAGGAAGCATATAGCAGTTTTGAAGAAAATTC  
 AGTCAAAGGCTGTTGAGCAAGGCTATGAAGATGCTTTTAACTTTTGGTTCGATAAATTAGTT  
 ACTAAGATCCTTCTCTGAAAAAGAATGAGATTATCGGAGACAGGATAGTAAAGTTAGTAGC  
 TGCATTTATAGCTTCTTTAGAAAAGGGAGTTGATATTGGCCAAAAAACAAAACATAAGCTCA  
 CGAATGATGAAGAAGGGATATTCTCAAGGTTCTGTCGATCAGTTCATAAGACATGTTTTGCGT  
 GGTGTGGAAGCCCTGACAAGAAGCTCAGATTTAGAGTTTACAGTTATTAGCCGTTATAAT  
 GGATAATATAGGGGAAATCGATGAATCACTTTTCAATTTATTAATATTGTCTTTAAATAAGA  
 GGATTTATGATAGAGAACCAACGGTTAGGATACAGGCTGTGTTTTGTTAACTAAATTCAG  
 GATGAAGAGCAAACCTGAACATTTAACTGAGCTTTCTGATAATGAAGAAAATTTTGAAGCTAC  
 GAGAATCTAGTTGCTTCTATCCAGAAGATCCGTCAGCTGAAGTACGGAGGGCTGCAATGC  
 TGAATTTGATCAATGATAATAATACTAGACCGTATATCTTGGAGAGGGCTAGAGATGTAAC  
 ATCGTTAATAGAAGGCTCGTGTATTTCGAGAATTTTGAATCAATGGGAAGAAAGTGTTCGA  
 TGATATTGAGCCGCATATTTTTGATCAATTGATTGAGTGGGGTTTGAAGATAGGGAAATTA  
 CAGTGAGAAATGCGTGTAAGAGACTCATTGCTCATGATTGGTTAAATGCTCTGGATGGCGAT  
 TTGATAGAATTACTAGAAAAATGGATGTCTCAAGATCCTCAGTGTGTGTTAAGGCTATAGA  
 AGCACTTTTTCAATCAAGGCCAGATATATTATCTAAAATCAAATTTCTGAAAGTATTTGGA  
 AAGACTTTACCGTAGAAATGCTTCTCTTTCCGGCTATTTATTTGTACTGTTTGGATAAT  
 AATATAACAGAAATGCTGGAAGAAAACCTTCCAGAAGCCTCAAATTTATCCGAGCATTTAAA  
 CCATTTATTTCTTCTCAGATATCATCACAACGACATTTCTAATGACTCTCAGTCGCATTTTG  
 ATTATAACACTTTAGAGTTTATTATTGAGCAACTATCGATTGCCGCCGAAAGGTATGATTAT  
 AGCGATGAGGTTGGAAGGAGATCGATGCTTACAGTGGTACGAAATATGCTGGCCTTAACTAC  
 ACTCTCCGAACCTCTTATTTAAATTTGGTATTCGTGTAATGAAAAGTCTGTCCATAAATGAAA

AAGATTTTGTAAACAATGGCAATAGAAATCATTAATGATATTAGAGACGACGATATTGAAAA  
CAAGAACAAGAAGAGAAAATAAAAAGCAAGAAGATTAATCGCAGAAATGAGACTTCCGTCGA  
TGAAGAGGACGAAAACGGCACACATAATGACGAAGTTAACGAGGATGAAGAAGACGACAATA  
TTTCATCCTTCCATTCTGCTGTAGAAAACCTTAGTGCAGGGAAACGGCAACGTATCTGAGAGT  
GACATAATAAATAATCTCCCACCCGAAAAGGAAGCGTCCTCAGCAACAATTTGTTCTCTGTCT  
TACAAGGTCATCATATATGCTAGAACTAGTTAACACACCGTTAACAGAAAACATTTTAATTG  
CGTCGTTGATGGACACTTTGATCACACCAGCGGTTAGAAAATACCGCGCCAAATATTAGGGAG  
CTTGGTGTCAAGAACCTTGGTTTATGTTGTCTCTTGGATGTGAAGTTGGCTATTGATAACAT  
GTACATCTTAGGTATGTGCGTTTCGAAAGGTAATGCATCATTAAGTATATTGCGTTACAAG  
TCATTGTAGATATTTTTTCCGTACATGGGAACACTGTGGTAGACGGAGAAGGCAAAGTTGAC  
TCAATCTCGTTGCACAAAATATTTTACAAGGTTTTAAAGAATAACGGTTTACCGGAATGTCA  
GGTGATAGCAGCGGAGGGTTTTATGCAAACTATTTTTGGCAGACGTGTTCACTGATGATGATT  
TGTTTTGAAACGTTGGTTTTGTTCATATTTTTCGCCGATAAAATTCCTCAAACGAAGCGCTGGTA  
CAGGCATTTGCCCTTCTGCATTCCAGTCTATTGTTTTTACATCCTGCTCATCAACAACGTAT  
GTCTAGGACGGCTGCGGACATACTCTTAAGACTATGTGTTCTTTGGGACGATTTACAGAGCT  
CTGTAATACCTGAGGTAGACCGTGAAGCTATGCTAAAGCCTAACATAATATTTCAACAGTTG  
CTATTTTGGACTGATCCACGTAACCTTAGTTAACCAGACAGGTTCAACAAAAAAGATACAGT  
GCAGCTTACATTCCTTGATCGATGTGCTCAAAATATACGCTCAAATTTGAGAAGAAAGAAATAA  
AGAAGATGATCATCACTAATATAAACGCTATATTTCTTTCTTCTGAACAAGATTATTCTACT  
TTGAAAGAACTTCTTGAGTATTCTGACGATATTGCAGAAAATGATAATTTAGACAATGTTAG  
CAAAAATGCTCTGGACAAGCTAAGGAATAATTTGAATTCGCTGATTGAAGAGATCAATGAAA  
GGTCAGAACTCAGACAAAAGATGAGAACAACACTGCGAATGACCAATACTCGTCTATTTTTG  
GGGAATTCATTCAATAAATCTTCAAATGACACCATAGAACACGCTGCTGATATAACTGATGG  
AAATAACACAGAAATTGACTAAAACAACCTGTTAATATTTTCGGCAGTTGACAATACAACAGAGC  
AAAGTAACTCAAGGAAAAGAACGAGATCAGAAGCGGAGCAAATTTGACACATCCAAAAACCTG  
GAAAACATGAGTATTC AAGACACGTCAACTGTAGCAAAAAATGTAAGTTTTGTTTTACCTGA  
CGAGAAATCAGATGCAATGTCCATAGATGAAGAAGATAAGGATTCAGAGTCTTTCAGCGAGG  
TCTGTTAA
